# Supplementary material for: Integrated Analysis of Omics Data Reveal AP-1 as a Potential Regulation Hub in the Inflammation-Induced Hyperalgesia Rat Model
Source: PubMed Central journal article supplement (PMC8194263; doi:10.3389/fimmu.2021.672498), 2021-05-28

# Supplementary Figure 1

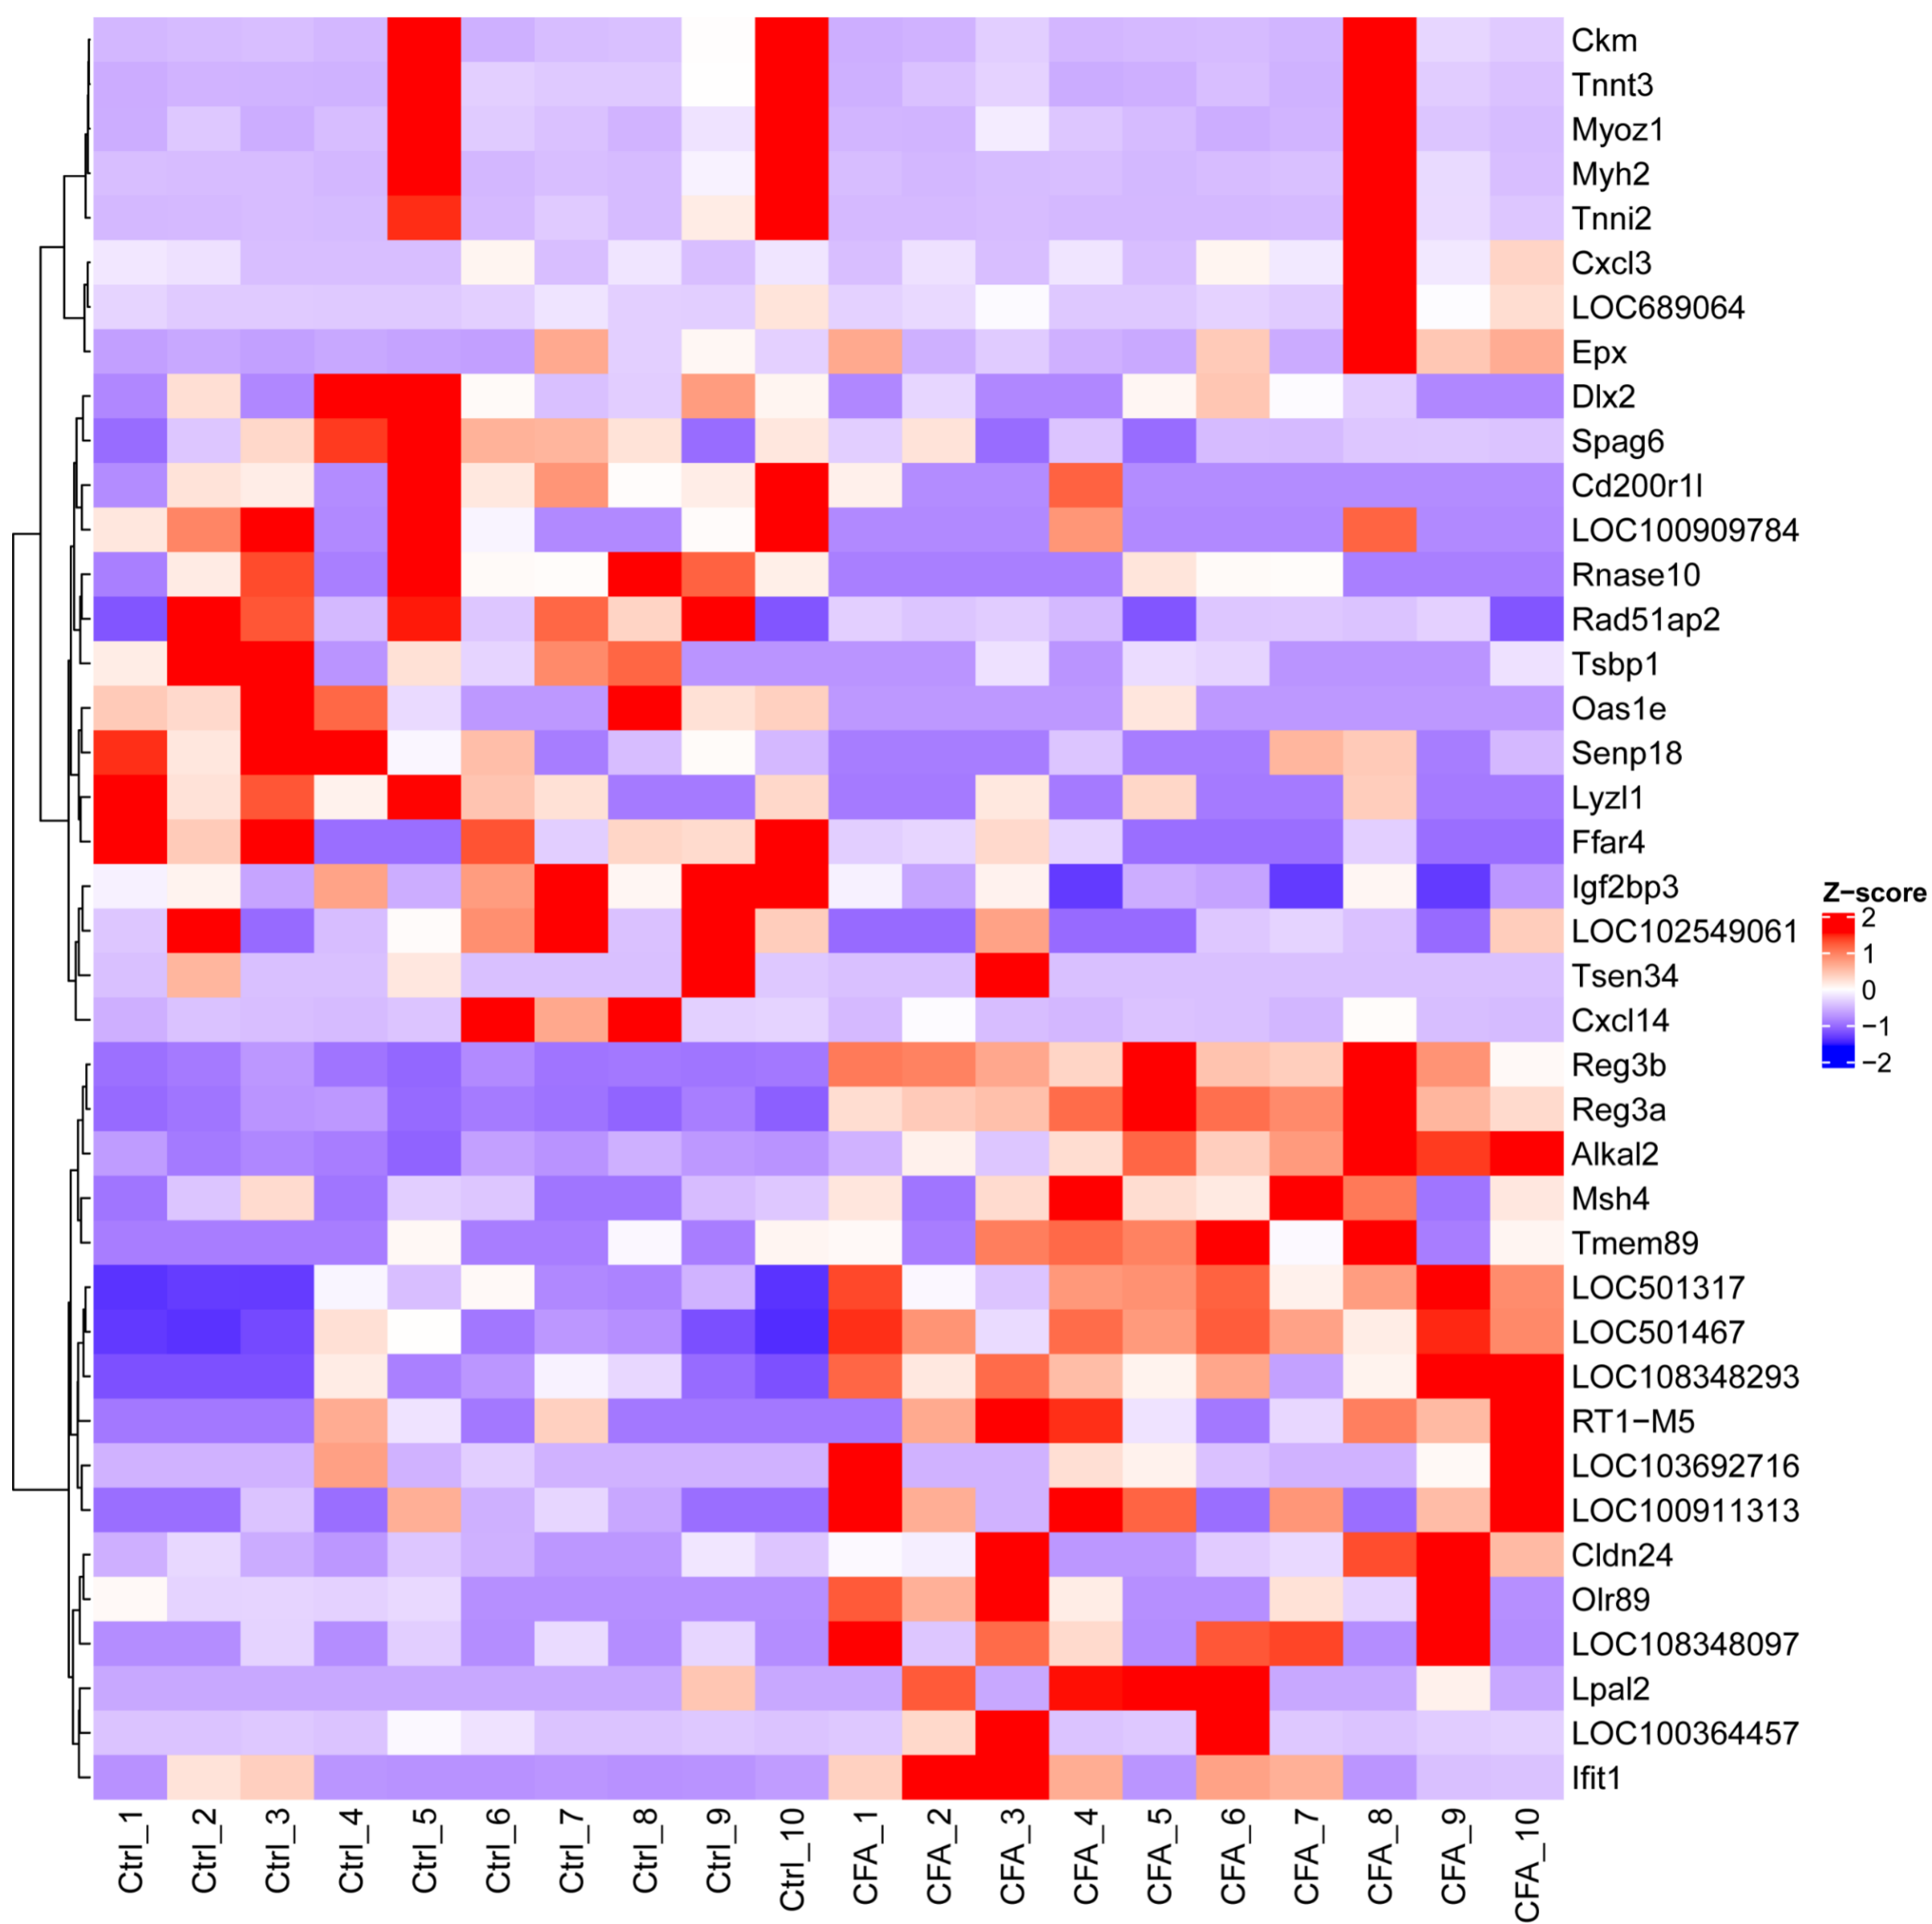

# Supplementary Figure 2

## a Egr1 expression

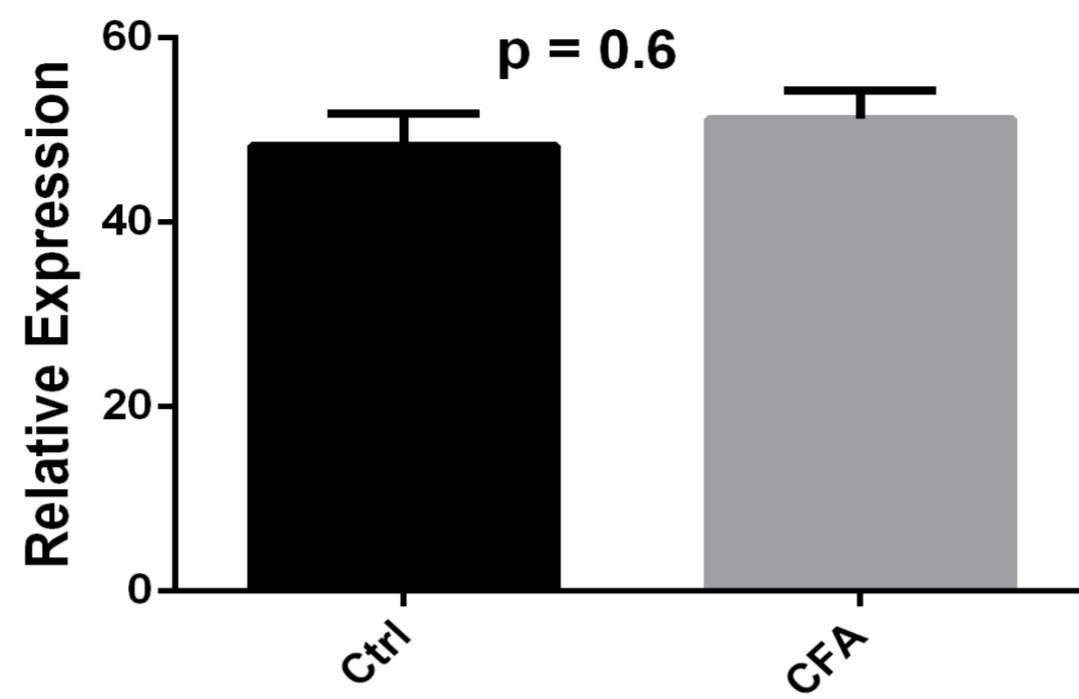

## b

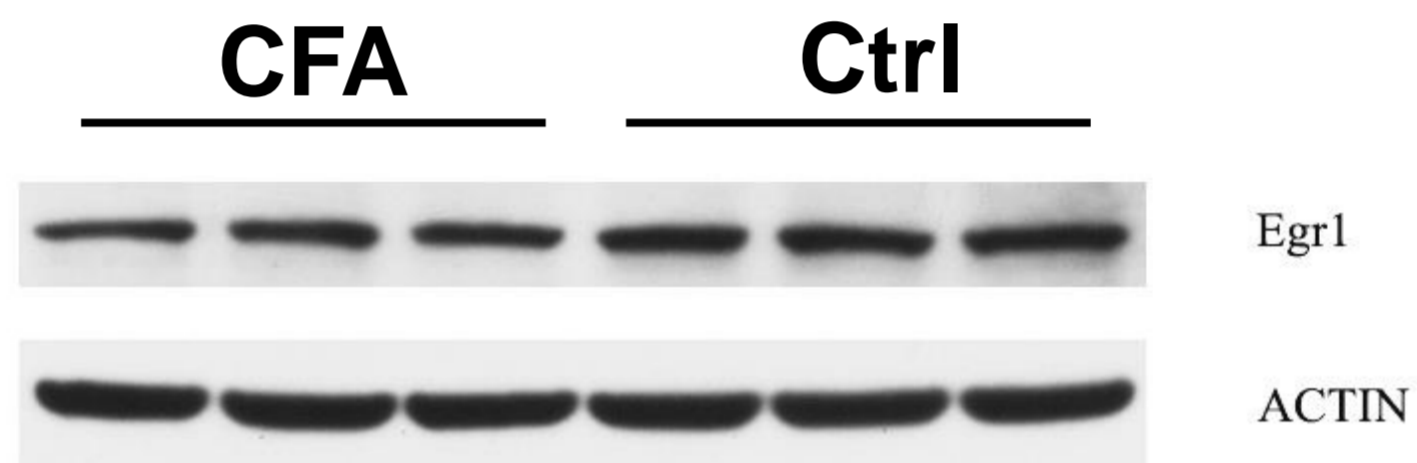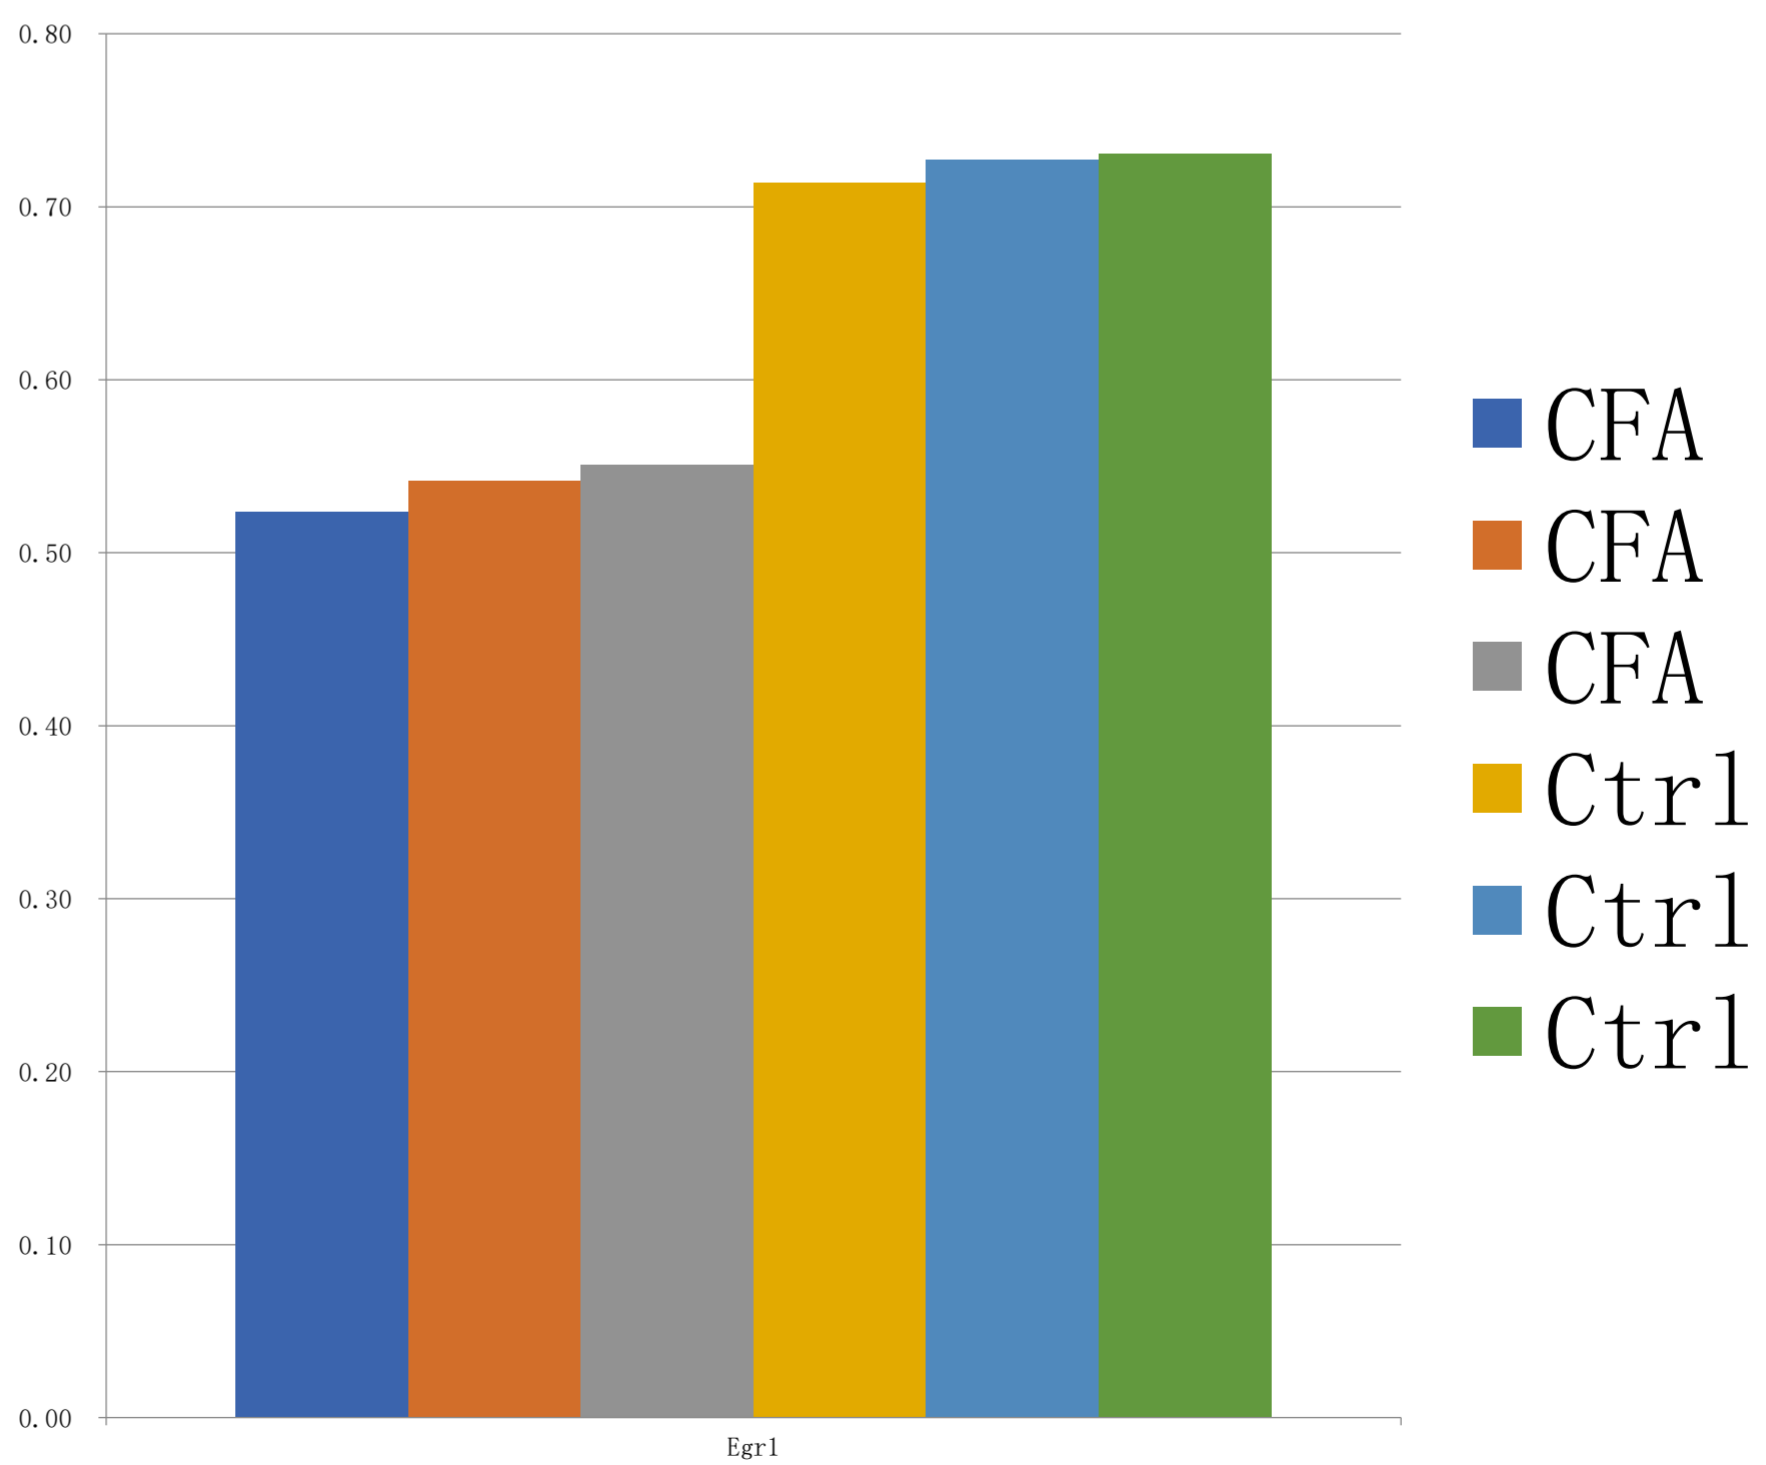

# Supplementary Figure 3

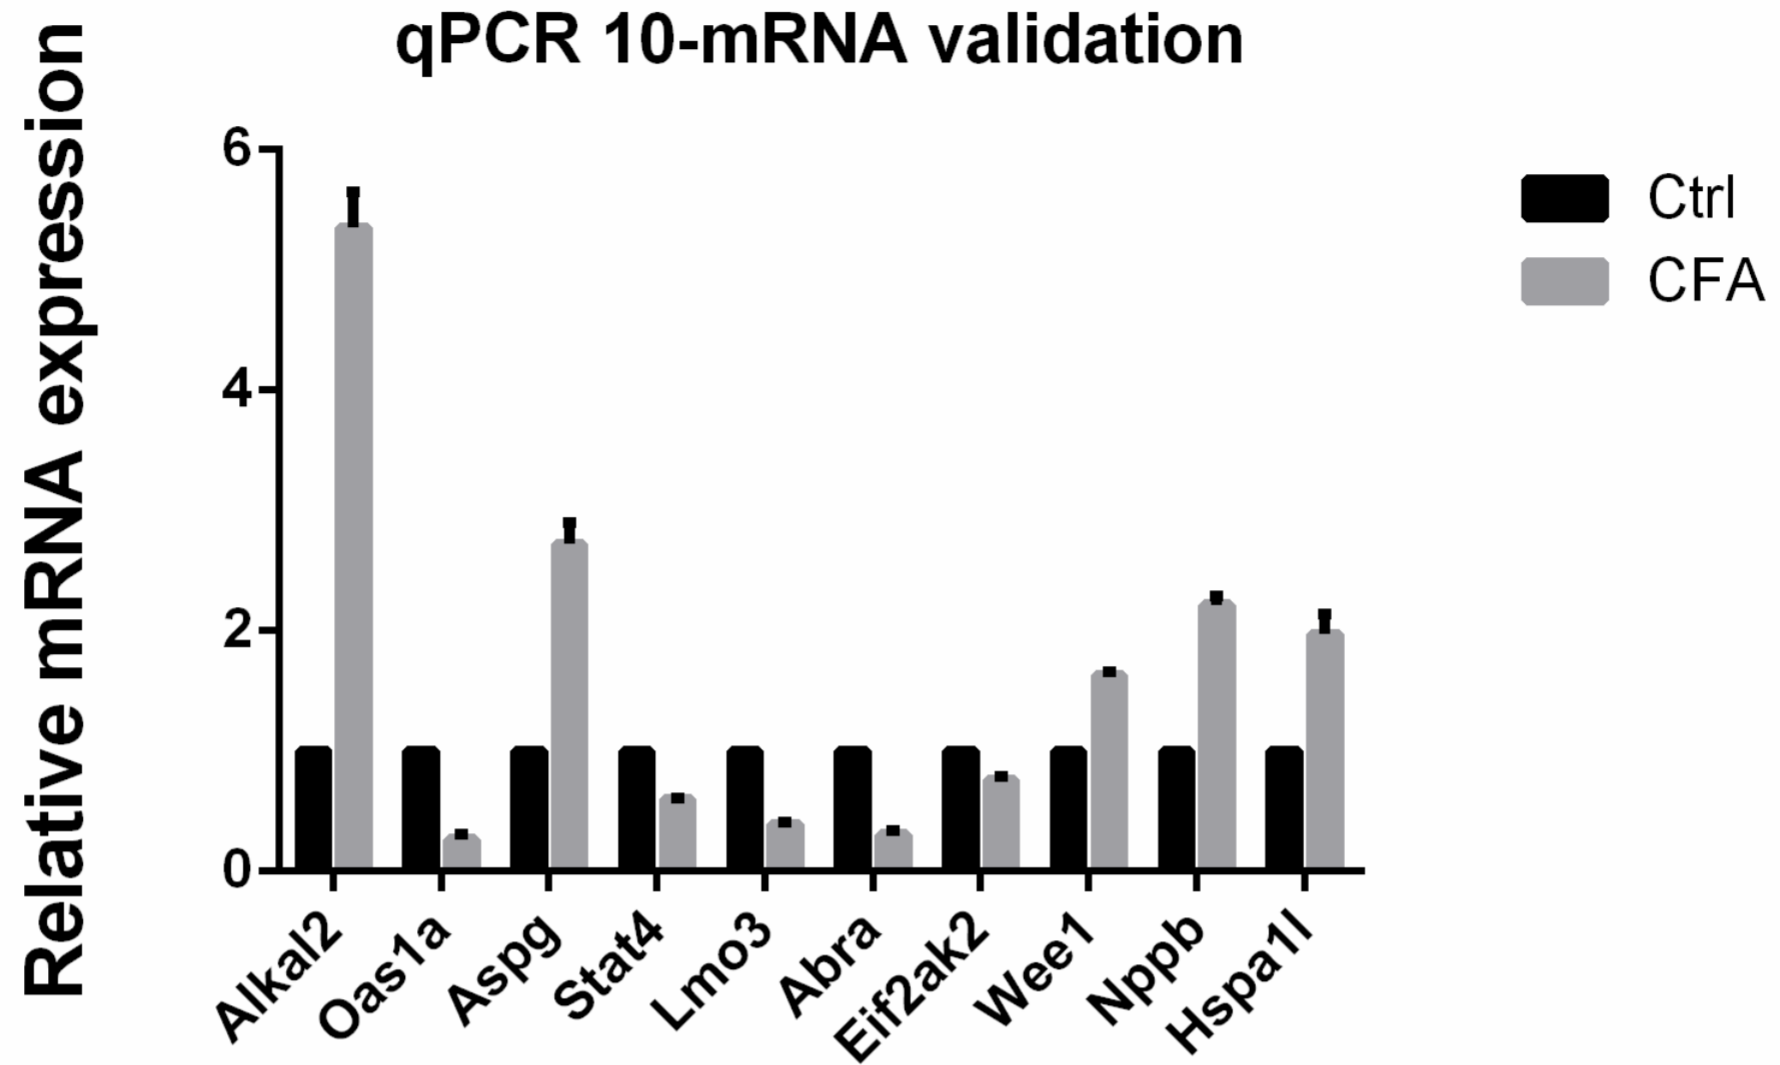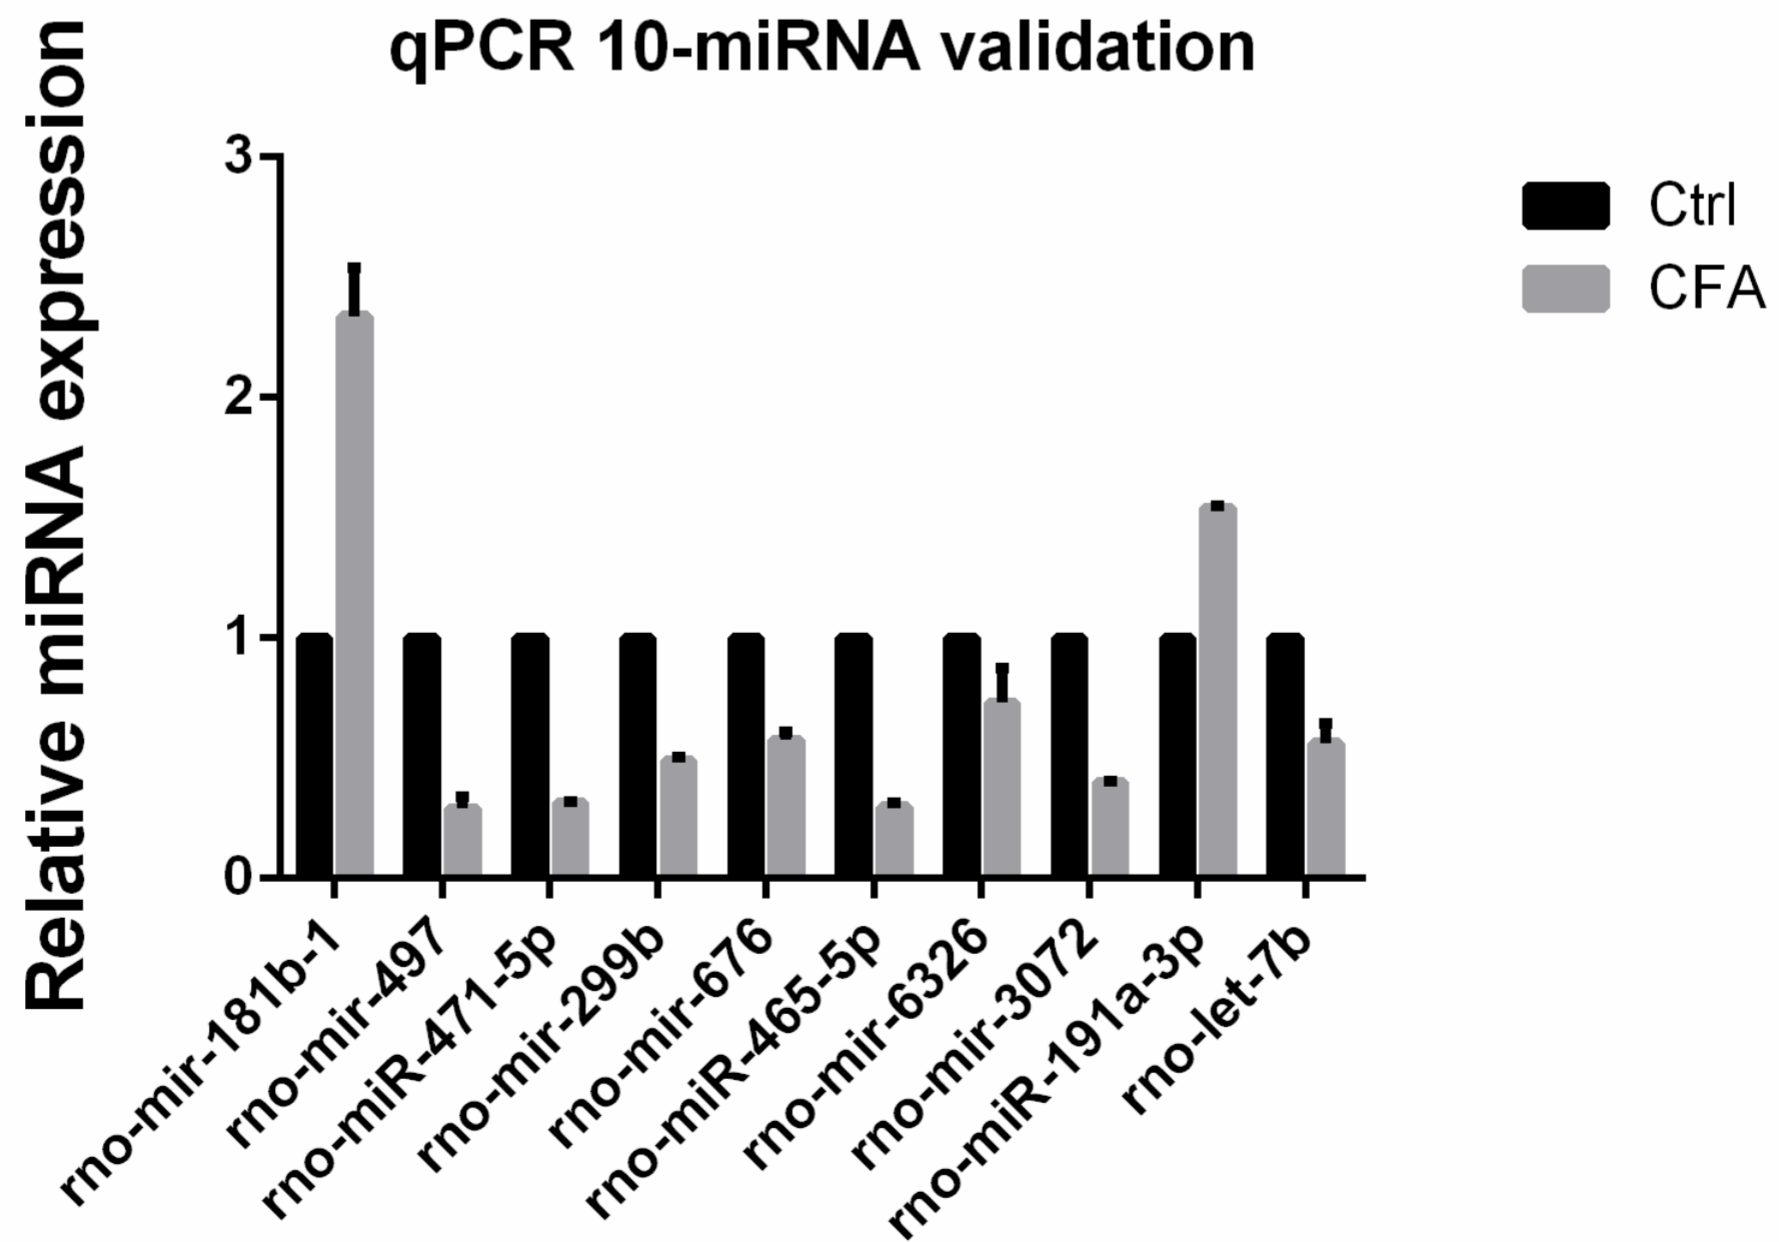

Supplement: Image_1.pdf [file Image_1.pdf]
