# Supplementary material for: Integrated Analysis of Omics Data Reveal AP-1 as a Potential Regulation Hub in the Inflammation-Induced Hyperalgesia Rat Model
Source: Front Immunol. 2021 May 28;12:672498. doi: 10.3389/fimmu.2021.672498 (PMC8194263; doi:10.3389/fimmu.2021.672498)
Supplement: Supplementary file 2 [file Table_1.xlsx]

## Sheet: Sheet1
Ensembl.id
