# Supplementary material for: Integrated Analysis of Omics Data Reveal AP-1 as a Potential Regulation Hub in the Inflammation-Induced Hyperalgesia Rat Model
Source: Front Immunol. 2021 May 28;12:672498. doi: 10.3389/fimmu.2021.672498 (PMC8194263; doi:10.3389/fimmu.2021.672498)
Supplement: Supplementary file 5 [file Table_4.xlsx]

## Sheet: Sheet1
chr	start	end	meth_diff	CpG number	pvalue	fdr	Annotation	Detailed Annotation	Distance to TSS	Nearest PromoterID	Gene Name
chr1	2262273	2262486	0.104501	10	0.0045572	0.0111608	exon (NM_001106217, exon 3 of 8)	-exon (NM_001106217, exon 3 of 8)	6488	NM_001106217	Lrp11
chr1	2421096	2421586	0.184892	11	0.00027108	0.00135751	intron (NM_001004217, intron 5 of 10)	-intron (NM_001004217, intron 5 of 10)	26394	NM_001004217	Katna1
chr1	2511197	2511459	-0.12714	12	0.0020487	0.00608453	intron (NM_001107469, intron 1 of 5)	-intron (NM_001107469, intron 1 of 5)	3963	NM_001107469	Zc3h12d
chr1	3494591	3495344	0.147857	11	0.00019275	0.00108447	Intergenic	Intergenic	-336737	NM_001108458	Ust
chr1	6211723	6212211	-0.207625	11	5.6999e-05	0.00048104	Intergenic	Intergenic	160421	NM_001276762	Epm2a
chr1	7882517	7882807	-0.165824	32	4.6074e-14	2.58907e-11	promoter-TSS (NM_012760)	-promoter-TSS (NM_012760)	-12	NM_012760	Plagl1
chr1	8091230	8091625	0.138759	10	0.00051649	0.00216162	intron (NM_214458, intron 1 of 11)	-intron (NM_214458, intron 1 of 11)	11239	NM_214458	Phactr2
chr1	9567810	9568015	0.161161	10	0.0018374	0.00559351	promoter-TSS (NM_001197092)	-promoter-TSS (NM_001197092)	-355	NM_001197092	Gje1
chr1	13247909	13248107	0.147759	10	0.0069351	0.0154424	Intergenic	Intergenic	36192	NM_001037789	Ccdc28a
chr1	13386757	13387093	-0.127987	10	0.0019309	0.00581606	Intergenic	Intergenic	-102725	NM_001037789	Ccdc28a
chr1	14794246	14794425	0.104602	10	0.021492	0.0372386	Intergenic	Intergenic	-52033	NM_053783	Ifngr1
chr1	15418900	15419074	0.109883	14	0.00024021	0.0012615	promoter-TSS (NM_001198638)	-promoter-TSS (NM_001198638)	-536	NM_001198638	Map7
chr1	16480748	16480952	-0.308621	10	4.5553e-11	7.8412e-09	Intergenic	Intergenic	148049	NM_001002277	Ahi1
chr1	17332362	17332513	0.195154	10	1.7127e-09	1.70145e-07	exon (NM_001029902, exon 11 of 12)	-exon (NM_001029902, exon 11 of 12)	419762	NM_001029902	Ptprk
chr1	20182333	20182388	0.272427	10	1.4833e-06	3.76142e-05	Intergenic	Intergenic	-120076	NM_001195606	Smlr1
chr1	20447743	20447824	0.15011	10	5.7623e-06	0.00010148	Intergenic	Intergenic	-125431	NM_001001801	Akap7
chr1	20697238	20697808	0.215154	12	6.8538e-06	0.000114392	intron (NM_001001801, intron 7 of 7)	-intron (NM_001001801, intron 7 of 7)	124308	NM_001001801	Akap7
chr1	21567602	21568107	0.197661	10	1.7982e-07	7.36493e-06	Intergenic	Intergenic	194169	NM_021869	Stx7
chr1	21951115	21951256	-0.10818	10	0.0055085	0.012868	Intergenic	Intergenic	5443	NM_001009975	Taar7c
chr1	21951336	21951724	0.111291	10	0.0011162	0.00382508	Intergenic	Intergenic	5099	NM_001009975	Taar7c
chr1	29966126	29966335	-0.394916	14	4.0634e-14	2.58907e-11	intron (NM_012654, intron 1 of 16)	-intron (NM_012654, intron 1 of 16)	7455	NM_012654	Slc9a3
chr1	30464383	30464565	-0.182052	13	5.7176e-14	2.73609e-11	exon (NM_053423, exon 2 of 16)	-exon (NM_053423, exon 2 of 16)	1468	NM_053423	Tert
chr1	30525627	30525923	-0.153766	10	0.00042219	0.0018716	intron (NM_012694, intron 10 of 14)	-intron (NM_012694, intron 10 of 14)	31765	NM_012694	Slc6a3
chr1	31559954	31560209	-0.104877	10	0.0015292	0.00486129	Intergenic	Intergenic	-935935	NM_001100735	Lpcat1
chr1	32128720	32129456	-0.151318	10	0.0036703	0.00946017	Intergenic	Intergenic	-1504941	NM_001100735	Lpcat1
chr1	32828056	32828446	0.137347	10	0.00015998	0.000963482	Intergenic	Intergenic	-1176521	NM_133425	Ppp1r14c
chr1	33758932	33759153	0.121423	10	2.2917e-05	0.000259793	Intergenic	Intergenic	-245729	NM_133425	Ppp1r14c
chr1	33897567	33897756	-0.12469	12	0.012645	0.0244578	Intergenic	Intergenic	-107110	NM_133425	Ppp1r14c
chr1	35001872	35001981	0.200685	21	4.5297e-14	2.58907e-11	intron (NM_057103, intron 1 of 3)	-intron (NM_057103, intron 1 of 3)	22888	NM_057103	Akap12
chr1	35261146	35261409	0.14284	10	8.3985e-07	2.4624e-05	Intergenic	Intergenic	117560	NM_001017447	Armt1
chr1	35465913	35466077	0.25314	13	5.9527e-07	1.87638e-05	Intergenic	Intergenic	-57685	NM_012689	Esr1
chr1	35982920	35983087	-0.127389	12	0.00063563	0.0025113	Intergenic	Intergenic	-331331	NM_001106207	Myct1
chr1	40816250	40816514	0.119284	12	0.0061613	0.0140089	exon (NM_032071, exon 25 of 26)	-exon (NM_032071, exon 25 of 26)	-42615	NM_001126088	Gtf2h5
chr1	41091656	41092388	-0.124591	12	0.0026398	0.00734922	intron (NM_001130939, intron 16 of 16)	-intron (NM_001130939, intron 16 of 16)	11975	NM_031318	Dynlt1
chr1	41220292	41220361	0.217448	10	5.1009e-10	6.28825e-08	intron (NM_019357, intron 1 of 12)	-intron (NM_019357, intron 1 of 12)	1408	NM_019357	Ezr
chr1	41858286	41858469	0.266414	10	3.9119e-10	5.0561e-08	Intergenic	Intergenic	11949	NM_017051	Sod2
chr1	41953890	41954403	0.101356	12	0.012579	0.0243611	Intergenic	Intergenic	32127	NM_001006995	Acat2
chr1	41968703	41968870	-0.11568	18	0.00054826	0.00225915	Intergenic	Intergenic	46767	NM_001006995	Acat2
chr1	42006720	42006906	-0.158712	12	8.0178e-06	0.000128316	Intergenic	Intergenic	84793	NM_001006995	Acat2
chr1	42030959	42031036	-0.119034	12	8.3932e-05	0.000621799	Intergenic	Intergenic	80224	NM_012670	Tcp1
chr1	42076691	42076910	-0.142579	16	8.107e-07	2.39384e-05	Intergenic	Intergenic	34421	NM_012670	Tcp1
chr1	42252888	42253001	0.293572	10	0.0013133	0.00433234	promoter-TSS (NM_012756)	-promoter-TSS (NM_012756)	-328	NM_012756	Igf2r
chr1	42978413	42978752	0.101023	10	0.00061337	0.00245855	exon (NM_001107456, exon 24 of 24)	-exon (NM_001107456, exon 24 of 24)	87411	NM_001107456	Map3k4
chr1	44724321	44724535	-0.133158	10	0.0063007	0.0142645	intron (NM_001077677, intron 4 of 4)	-intron (NM_001077677, intron 4 of 4)	-197730	NM_001115021	Qk
chr1	44731346	44731577	0.128002	10	4.6386e-05	0.000416604	intron (NM_001077677, intron 4 of 4)	-intron (NM_001077677, intron 4 of 4)	-190696	NM_001115021	Qk
chr1	45590849	45591010	0.104648	10	0.0045922	0.0112259	exon (NM_001106208, exon 1 of 1)	-exon (NM_001106208, exon 1 of 1)	504	NM_001106208	Pabpc6
chr1	46893962	46894047	-0.155153	10	6.5425e-06	0.00011068	Intergenic	Intergenic	50983	NM_001106209	T
chr1	46904280	46904357	0.136972	10	0.00078039	0.00292376	Intergenic	Intergenic	40669	NM_001106209	T
chr1	46904825	46904916	0.180354	12	1.8329e-05	0.000225657	Intergenic	Intergenic	40117	NM_001106209	T
chr1	46963986	46964683	0.170039	10	0.00067694	0.00263174	intron (NM_001161835, intron 7 of 10)	-intron (NM_001161835, intron 7 of 10)	-19347	NM_001106209	T
chr1	47293836	47294261	0.104543	10	0.0029199	0.0079385	Intergenic	Intergenic	66558	NM_001106210	Rnaset2
chr1	53123668	53124087	-0.129559	10	0.00034417	0.00160537	Intergenic	Intergenic	-30847	NM_001107464	Dact2
chr1	53560005	53560436	0.174984	10	0.0005405	0.00223382	Intergenic	Intergenic	53431	NM_001169138	Thbs2
chr1	64350725	64351062	-0.103338	11	0.0011052	0.00380134	Intergenic	Intergenic	-27916	NM_001025639	LOC292543
chr1	66152381	66152601	-0.138531	11	1.3675e-05	0.000184405	exon (NM_001169143, exon 2 of 4)	-exon (NM_001169143, exon 2 of 4)	10215	NM_001169143	Zfp444
chr1	66204626	66204754	0.120244	10	0.00047142	0.00202193	exon (NM_001108904, exon 2 of 2)	-exon (NM_001108904, exon 2 of 2)	11537	NM_001108904	Zfp787
chr1	66204961	66205017	0.129948	10	0.00036061	0.00166356	exon (NM_001108904, exon 2 of 2)	-exon (NM_001108904, exon 2 of 2)	11836	NM_001108904	Zfp787
chr1	67723014	67723135	-0.181677	12	2.7861e-06	5.94109e-05	intron (NM_001145175, intron 4 of 5)	-intron (NM_001145175, intron 4 of 5)	12549	NM_001145175	Shisa7
chr1	68024713	68024844	0.142675	10	5.9508e-14	2.73609e-11	intron (NM_001271115, intron 8 of 12)	-intron (NM_001271115, intron 8 of 12)	-3419	NM_017144	Tnni3
chr1	68029605	68029776	0.10632	10	0.016204	0.0296235	exon (NM_017144, exon 5 of 8)	-exon (NM_017144, exon 5 of 8)	1493	NM_017144	Tnni3
chr1	69449663	69449886	-0.142978	12	4.9257e-08	2.65497e-06	exon (NM_001108469, exon 1 of 1)	-exon (NM_001108469, exon 1 of 1)	363	NM_001108469	Cdc42ep5
chr1	72914430	72914623	0.109901	10	0.00025444	0.00129678	exon (NM_001107478, exon 2 of 3)	-exon (NM_001107478, exon 2 of 3)	2323	NM_001107478	Zbtb45
chr1	76260435	76260504	-0.104699	10	6.8506e-06	0.00011439	Intergenic	Intergenic	-5528	NM_013027	Sepw1
chr1	76448852	76449213	0.112567	11	0.00054586	0.00225099	exon (NM_080585, exon 3 of 11)	-exon (NM_080585, exon 3 of 11)	10417	NM_080585	Napa
chr1	77222108	77222613	-0.180804	10	0.00041065	0.00183258	intron (NM_139185, intron 3 of 4)	-intron (NM_139185, intron 3 of 4)	1060	NM_139185	Gng8
chr1	77244626	77244756	-0.130607	10	0.00029613	0.00143785	TTS (NM_012518)	-TTS (NM_012518)	8026	NM_012518	Calm3
chr1	77244985	77245231	0.223968	10	1.6612e-07	6.94081e-06	TTS (NM_012518)	-TTS (NM_012518)	7609	NM_012518	Calm3
chr1	78276171	78276615	0.101768	10	0.0036134	0.00935287	Intergenic	Intergenic	-15044	NM_001106229	Ccdc61
chr1	78312174	78312723	-0.183158	10	0.00065902	0.00257736	Intergenic	Intergenic	-28656	NM_001108908	Nanos2
chr1	78449267	78449740	-0.163375	18	9.016e-06	0.000139509	Intergenic	Intergenic	-31410	NM_001025642	Fbxo46
chr1	78478678	78478734	-0.112015	10	0.0022199	0.00648065	Intergenic	Intergenic	-2208	NM_001025642	Fbxo46
chr1	78860219	78860405	-0.176535	10	0.00029894	0.00144773	Intergenic	Intergenic	-1895	NM_001109410	Trappc6a
chr1	79004086	79004248	0.126561	17	0.0029301	0.00796449	exon (NM_001270684, exon 4 of 4)	-exon (NM_001270683, exon 4 of 4)	2098	NM_001270684	Apoe
chr1	79067534	79068272	0.224711	10	0.00021413	0.00116476	intron (NM_031752, intron 14 of 14)	-intron (NM_031752, intron 14 of 14)	-8217	NM_001012064	Pvrl2
chr1	79575996	79576235	0.148677	16	0.00012285	0.000802802	exon (NM_001106233, exon 1 of 1)	-exon (NM_001106233, exon 1 of 1)	410	NM_001106233	Tescl
chr1	79612720	79613151	0.116251	10	6.4046e-05	0.00051804	promoter-TSS (NM_001270701)	-promoter-TSS (NM_023021)	-800	NM_023021	Kcnn4
chr1	79784630	79784846	0.110925	14	0.00013994	0.000883268	intron (NM_001047107, intron 2 of 7)	-intron (NM_001047107, intron 2 of 7)	766	NM_001047107	Cadm4
chr1	79784863	79784963	0.174951	12	2.3432e-06	5.23478e-05	intron (NM_001047107, intron 3 of 7)	-intron (NM_001047107, intron 3 of 7)	941	NM_001047107	Cadm4
chr1	79785263	79785392	0.145835	12	0.00019133	0.00107859	exon (NM_001047107, exon 4 of 8)	-exon (NM_001047107, exon 4 of 8)	1356	NM_001047107	Cadm4
chr1	80302301	80302752	0.102397	10	0.001069	0.00370859	intron (NM_012506, intron 4 of 22)	-intron (NM_012506, intron 4 of 22)	7307	NM_012506	Atp1a3
chr1	80440008	80440413	-0.123957	10	0.00018884	0.00106842	intron (NM_001271204, intron 1 of 14)	-intron (NM_001271204, intron 1 of 14)	2464	NM_001271204	Pou2f2
chr1	80521649	80521890	-0.167627	13	5.9119e-05	0.000492588	exon (NM_001170335, exon 3 of 4)	-exon (NM_001170335, exon 3 of 4)	5372	NM_001170335	Erf
chr1	80600092	80600497	-0.110145	10	0.0031612	0.00844879	intron (NM_053628, intron 1 of 41)	-intron (NM_053628, intron 1 of 41)	8833	NM_053628	Megf8
chr1	80669415	80669660	-0.101523	11	0.0086197	0.0181497	intron (NM_012859, intron 2 of 9)	-intron (NM_012859, intron 2 of 9)	12942	NM_012859	Lipe
chr1	80713559	80713758	0.136938	10	0.0091967	0.0191112	Intergenic	Intergenic	-18761	NM_001107491	Cxcl17
chr1	80911565	80911965	-0.294455	10	4.0685e-08	2.26822e-06	TTS (NM_021578)	-TTS (NM_021578)	13392	NM_001106235	Ccdc97
chr1	81314152	81314330	0.174297	10	2.4459e-05	0.000270862	Intergenic	Intergenic	-31184	NM_001198676	Cyp2b2
chr1	82351565	82351759	0.138348	10	0.00041065	0.00183258	exon (NM_001033888, exon 8 of 10)	-exon (NM_001033888, exon 8 of 10)	17858	NM_001033888	Numbl
chr1	83154412	83155009	-0.174651	14	2.953e-07	1.0846e-05	intron (NM_057122, intron 6 of 10)	-intron (NM_057122, intron 6 of 10)	4753	NM_057122	Psmc4
chr1	83369241	83369559	0.155517	10	8.7191e-07	2.52222e-05	intron (NM_001166396, intron 1 of 5)	-intron (NM_001166396, intron 1 of 5)	825	NM_001166396	Selv
chr1	83477593	83477918	-0.186358	13	1.46e-05	0.000192988	intron (NM_001134972, intron 8 of 18)	-intron (NM_001134972, intron 8 of 18)	4843	NM_001134972	Plekhg2
chr1	83565879	83566024	-0.117329	10	3.4867e-05	0.000346011	Intergenic	Intergenic	-1104	NM_001108910	Lrfn1
chr1	83686991	83687858	-0.114705	11	0.0094009	0.0194619	intron (NM_001106238, intron 1 of 9)	-intron (NM_001106238, intron 1 of 9)	22645	NM_001106238	Pak4
chr1	83904359	83905334	-0.111094	14	0.016724	0.0304134	exon (NM_001106241, exon 8 of 12)	-exon (NM_001106241, exon 8 of 12)	8436	NM_001106241	Rinl
chr1	83964204	83964530	0.22672	10	1.1552e-05	0.0001652	Intergenic	Intergenic	-3896	NM_022582	Lgals7
chr1	84489979	84490150	-0.112841	12	0.0032245	0.0085897	exon (NM_001013066, exon 2 of 10)	-exon (NM_001013066, exon 2 of 10)	3512	NM_001013066	Sipa1l3
chr1	84508171	84508327	-0.1504	10	0.0021839	0.00639304	Intergenic	Intergenic	-14672	NM_001013066	Sipa1l3
chr1	84945140	84945365	-0.167006	10	3.4867e-05	0.000346011	Intergenic	Intergenic	32953	NM_001271339	Zfp74
chr1	85280114	85280324	-0.202953	13	3.6734e-09	3.23614e-07	intron (NM_001098240, intron 4 of 9)	-intron (NM_001098240, intron 4 of 9)	-11477	NM_001177687	RGD1562079
chr1	85408093	85408201	0.170969	10	4.3065e-06	8.18706e-05	exon (NM_001271398, exon 9 of 15)	-exon (NM_001271398, exon 9 of 15)	4203	NM_001271398	Kirrel2
chr1	85521651	85521788	0.141202	10	0.0051083	0.0121768	exon (NM_017118, exon 3 of 9)	-exon (NM_017118, exon 3 of 9)	2152	NM_017118	Capns1
chr1	85552345	85552487	-0.118115	10	0.030027	0.0489221	exon (NM_001038588, exon 7 of 10)	-exon (NM_001038588, exon 7 of 10)	6402	NM_001038588	Prodh2
chr1	85911535	85911651	-0.217224	10	9.6332e-05	0.000678922	exon (NM_001108912, exon 2 of 2)	-exon (NM_001108912, exon 2 of 2)	986	NM_001108912	Ffar3
chr1	85990628	85991174	0.110273	10	3.2705e-05	0.000329992	intron (NM_031139, intron 7 of 10)	-intron (NM_031139, intron 7 of 10)	2445	NM_031139	Usf2
chr1	86008335	86008690	0.147129	13	0.021962	0.0378581	intron (NM_032616, intron 1 of 9)	-intron (NM_032616, intron 1 of 9)	869	NM_032616	Lsr
chr1	86095554	86095750	0.111388	10	0.018994	0.0337704	promoter-TSS (NM_022008)	-promoter-TSS (NM_022008)	-607	NM_022008	Fxyd7
chr1	86100212	86100649	0.200725	10	9.2799e-07	2.64605e-05	Intergenic	Intergenic	-1063	NM_031648	Fxyd1
chr1	86150395	86150528	0.105719	14	1.1343e-05	0.000163211	exon (NM_017112, exon 5 of 12)	-exon (NM_017112, exon 5 of 12)	10629	NM_017112	Hpn
chr1	86291624	86292203	0.107082	10	0.005719	0.013238	Intergenic	Intergenic	38015	NM_001170400	LOC292801
chr1	86586728	86587297	0.125931	11	2.3773e-05	0.000266185	Intergenic	Intergenic	40309	NM_001100859	Scgb1b30
chr1	86689233	86689322	-0.194634	10	1.6136e-05	0.000206839	Intergenic	Intergenic	-2566	NM_207592	Gpi
chr1	86796027	86796492	0.10062	10	0.010595	0.021338	exon (NM_001127552, exon 10 of 10)	-exon (NM_001127552, exon 10 of 10)	43746	NM_001127552	Lsm14a
chr1	87016065	87016573	-0.191682	10	0.00018884	0.00106842	Intergenic	Intergenic	114371	NM_001109141	Kctd15
chr1	87085105	87085371	-0.106894	10	0.0027833	0.00765571	Intergenic	Intergenic	45452	NM_001109141	Kctd15
chr1	87553561	87553855	-0.151673	13	1.46e-05	0.000192988	exon (NM_012831, exon 2 of 2)	-exon (NM_012831, exon 2 of 2)	5739	NM_012831	Cebpg
chr1	87630023	87630865	0.102403	10	0.0012162	0.00408348	Intergenic	Intergenic	4324	NM_001287579	Cebpa
chr1	90861397	90861786	-0.14116	10	0.00034096	0.00159338	Intergenic	Intergenic	12072	NM_001108913	LOC365238
chr1	93609245	93609412	0.14932	17	1.6569e-09	1.6682e-07	Intergenic	Intergenic	-125526	NM_001106249	Siglec5
chr1	94212111	94212277	-0.139453	10	0.00087505	0.00319915	intron (NM_001004100, intron 2 of 4)	-intron (NM_001004100, intron 2 of 4)	1270	NM_001004100	Klk10
chr1	94893452	94893933	0.192228	10	5.7623e-06	0.00010148	Intergenic	Intergenic	26886	NM_019122	Syt3
chr1	95312615	95312748	0.127512	10	4.1752e-05	0.000389112	TTS (NM_001106258)	-TTS (NM_001106258)	8962	NM_001106258	Tbc1d17
chr1	95339353	95340088	-0.136699	12	0.00071353	0.00273853	exon (NM_001008304, exon 5 of 12)	-exon (NM_001008304, exon 5 of 12)	2723	NM_001008304	Ptov1
chr1	95371577	95371777	0.13374	10	0.00099745	0.00351887	exon (NM_001037646, exon 7 of 11)	-exon (NM_001037646, exon 7 of 11)	3261	NM_001037646	Fuz
chr1	95562773	95562847	-0.115125	10	0.00022253	0.00119479	exon (NM_001008694, exon 3 of 8)	-exon (NM_001008694, exon 3 of 8)	3228	NM_001008694	Rcn3
chr1	95649123	95649259	0.164334	10	5.6564e-05	0.000477585	intron (NM_053859, intron 9 of 11)	-intron (NM_053859, intron 9 of 11)	8441	NM_053859	Slc17a7
chr1	95887869	95888007	-0.115859	10	0.00014217	0.000892367	exon (NM_013184, exon 3 of 3)	-exon (NM_013184, exon 3 of 3)	2361	NM_013184	Ntf4
chr1	96271186	96271346	0.162291	10	1.3065e-05	0.000178892	Intergenic	Intergenic	-9594	NM_001039665	Sult2b1
chr1	96296577	96296824	0.136198	14	0.00029034	0.00141869	intron (NM_170718, intron 1 of 2)	-intron (NM_170718, intron 1 of 2)	1046	NM_170718	Kcnj14
chr1	96556106	96556260	-0.147539	12	1.1671e-12	3.22362e-10	intron (NM_001108484, intron 15 of 30)	-intron (NM_001108484, intron 15 of 30)	27508	NM_001108484	Nomo1
chr1	97109037	97109673	-0.100078	12	0.0064096	0.0144672	Intergenic	Intergenic	98196	NM_001100634	Tph1
chr1	97729885	97730185	-0.111188	10	0.0032885	0.00871915	exon (NM_145787, exon 2 of 2)	-exon (NM_145787, exon 2 of 2)	27115	NM_145787	Mrgprx3
chr1	99215118	99215623	0.124255	17	1.2738e-08	8.8935e-07	intron (NM_138529, intron 5 of 37)	-intron (NM_138529, intron 5 of 37)	174327	NM_138529	Nav2
chr1	99445629	99446179	-0.105606	10	0.0068843	0.0153513	Intergenic	Intergenic	-4285	NM_001009644	Dbx1
chr1	118407048	118407227	0.176224	10	6.8834e-05	0.000542209	Intergenic	Intergenic	-8200	NM_001109147	Klf13
chr1	120357960	120358422	-0.102797	14	0.0077824	0.0168146	intron (NM_012999, intron 5 of 18)	-intron (NM_012999, intron 5 of 18)	33348	NM_012999	Pcsk6
chr1	120973432	120974026	0.134023	11	0.00026229	0.00132644	Intergenic	Intergenic	-91846	NM_153300	Aldh1a3
chr1	121091515	121091606	0.138148	10	0.00057586	0.00234468	Intergenic	Intergenic	51212	NM_001108915	Asb7
chr1	121455855	121456413	0.160588	11	0.00092959	0.00335201	Intergenic	Intergenic	262141	NM_001127561	Cers3
chr1	122999830	123000273	0.118731	10	0.00015998	0.000963482	Intergenic	Intergenic	295078	NM_052807	Igf1r
chr1	124467080	124467509	0.159414	11	0.00012595	0.000815923	Intergenic	Intergenic	819634	NM_080778	Nr2f2
chr1	125211471	125211711	-0.119767	13	4.8212e-05	0.000429186	Intergenic	Intergenic	75338	NM_080778	Nr2f2
chr1	128971249	128971614	-0.11646	10	0.007682	0.016648	Intergenic	Intergenic	-187284	NM_057156	St8sia2
chr1	131146256	131146543	0.20371	10	0.0044536	0.0109625	intron (NM_001106271, intron 2 of 38)	-intron (NM_001106271, intron 2 of 38)	93726	NM_001106271	Akap13
chr1	136207600	136208004	0.122716	10	0.00042219	0.0018716	exon (NM_001108488, exon 3 of 19)	-exon (NM_001108488, exon 3 of 19)	957	NM_001108488	Fes
chr1	137513151	137513521	0.113005	10	0.019244	0.0341175	intron (NM_198767, intron 9 of 21)	-intron (NM_198767, intron 9 of 21)	41483	NM_017152	Rps17
chr1	137831574	137831844	0.167242	14	2.1209e-07	8.40106e-06	exon (NM_053309, exon 7 of 10)	-exon (NM_053309, exon 7 of 10)	45895	NM_001130728	Whamm
chr1	139604731	139604873	0.128224	10	0.0018993	0.0057366	Intergenic	Intergenic	-237772	NM_001170432	Tmc3
chr1	140158325	140158497	0.107974	18	1.3009e-06	3.38153e-05	exon (NM_001013149, exon 1 of 1)	-exon (NM_001013149, exon 1 of 1)	966	NM_001013149	Mesdc1
chr1	140219101	140219551	0.105617	17	3.9148e-06	7.63601e-05	Intergenic	Intergenic	51475	NM_001008345	Mesdc2
chr1	153966313	153966341	0.110411	10	1.2038e-06	3.17329e-05	intron (NM_001191628, intron 5 of 31)	-intron (NM_001191628, intron 5 of 31)	-249807	NM_001034921	Nars2
chr1	155354877	155355000	0.10697	10	0.0031863	0.00850188	intron (NM_153473, intron 2 of 48)	-intron (NM_153473, intron 2 of 48)	7759	NM_153473	Myo7a
chr1	155730069	155730485	-0.12857	11	2.0439e-05	0.000242267	intron (NM_130737, intron 9 of 20)	-intron (NM_130737, intron 9 of 20)	16812	NM_130737	Gucy2d
chr1	156141143	156141672	0.110368	10	0.001915	0.00577375	TTS (NM_001109336)	-TTS (NM_001109336)	1265	NM_001109336	RGD1561870
chr1	156174193	156174437	-0.138616	16	2.9606e-11	5.47462e-09	Intergenic	Intergenic	-31642	NM_001109336	RGD1561870
chr1	156915752	156916182	-0.163197	10	0.00010547	0.000722071	intron (NM_012910, intron 1 of 15)	-intron (NM_012910, intron 1 of 15)	28454	NR_031773	Mir326
chr1	156988740	156989258	0.109895	11	0.011637	0.0228729	Intergenic	Intergenic	39888	NM_080786	Slco2b1
chr1	156989921	156990264	0.30696	10	1.953e-10	2.88342e-08	Intergenic	Intergenic	38794	NM_080786	Slco2b1
chr1	157275292	157275429	0.222378	10	2.8431e-07	1.05881e-05	Intergenic	Intergenic	-57961	NM_001191601	Spcs2
chr1	158096077	158096255	0.122747	10	0.00039941	0.00179252	promoter-TSS (NM_172033)	-promoter-TSS (NM_172033)	31	NM_172033	Plekhb1
chr1	158372885	158373086	0.117667	10	0.00046712	0.00200809	Intergenic	Intergenic	33797	NM_057124	P2ry6
chr1	158961190	158961556	0.17885	10	8.975e-05	0.000649948	intron (NM_031079, intron 1 of 29)	-intron (NM_001270604, intron 1 of 30)	9615	NM_031079	Pde2a
chr1	159452837	159453615	0.128002	10	0.0053451	0.0125783	intron (NM_001100691, intron 13 of 23)	-intron (NM_001100691, intron 13 of 23)	20502	NM_053374	Il18bp
chr1	159592987	159593098	-0.180342	15	9.0433e-09	6.7424e-07	exon (NM_022639, exon 4 of 5)	-exon (NM_022639, exon 4 of 5)	2058	NM_022639	Chrna10
chr1	161099329	161099783	0.148445	14	2.034e-06	4.72782e-05	exon (NM_001001023, exon 1 of 1)	-exon (NM_001001023, exon 1 of 1)	418	NM_001001023	Olr94
chr1	163505881	163506017	-0.181182	12	1.1474e-11	2.36789e-09	exon (NM_001107544, exon 10 of 20)	-exon (NM_001107544, exon 10 of 20)	-9432	NM_031357	Tpp1
chr1	166369178	166369943	-0.108009	17	2.8862e-06	6.11158e-05	Intergenic	Intergenic	38229	NM_001277302	Eif3f
chr1	168379242	168379504	-0.112174	12	0.010506	0.0212044	promoter-TSS (NM_012715)	-promoter-TSS (NM_012715)	-882	NM_012715	Adm
chr1	170701181	170701477	-0.145403	12	2.5671e-06	5.58793e-05	Intergenic	Intergenic	219444	NM_001198589	Tead1
chr1	171811161	171811491	0.115775	12	0.0013732	0.00448484	intron (NM_172067, intron 2 of 14)	-intron (NM_172067, intron 2 of 14)	110831	NM_172067	Spon1
chr1	175179892	175180165	-0.153315	10	0.0002162	0.00117277	exon (NM_031563_1, exon 1 of 1)	-exon (NM_031563_1, exon 1 of 1)	494	NM_031563_1	Ybx1
chr1	179083248	179083389	-0.150775	10	0.00048899	0.0020789	Intergenic	Intergenic	110380	NM_001106293	Abca15
chr1	180111277	180111531	-0.193279	10	1.5099e-05	0.000197249	Intergenic	Intergenic	-91387	NM_181370	Hs3st2
chr1	184665462	184665938	0.196647	10	5.5979e-05	0.000473716	promoter-TSS (NM_001012469)	-promoter-TSS (NM_001012469)	-37	NM_001012469	Il21r
chr1	184977590	184978196	0.121749	12	0.00014205	0.000892367	Intergenic	Intergenic	180070	NM_001134574	LOC361646
chr1	185096123	185096844	-0.125249	10	0.0098738	0.0202602	Intergenic	Intergenic	173104	NM_001011935	Xpo6
chr1	185363293	185363407	0.129276	13	0.00044545	0.0019499	exon (NM_147135, exon 4 of 4)	-exon (NM_147135, exon 4 of 4)	19083	NM_147135	Sbk1
chr1	185363479	185363611	0.15543	11	0.0097545	0.020065	exon (NM_147135, exon 4 of 4)	-exon (NM_147135, exon 4 of 4)	19278	NM_147135	Sbk1
chr1	186008300	186008688	0.156913	12	4.4361e-05	0.000405833	TTS (NM_001109155)	-TTS (NM_001106296)	1239	NM_001109155	RGD1563217
chr1	186029857	186030261	0.117204	10	0.00026938	0.00135062	TTS (NM_001013900)	-TTS (NM_001013900)	2238	NM_022937	Doc2a
chr1	186202541	186202900	-0.111854	10	0.00019821	0.00110355	intron (NM_001110319, intron 3 of 4)	-intron (NM_001110319, intron 3 of 4)	1643	NM_001110319	Maz
chr1	186311663	186312234	-0.112336	10	0.0016082	0.00505266	Intergenic	Intergenic	-8785	NM_134409	Zg16
chr1	187095886	187096378	0.110029	15	8.0253e-10	9.02919e-08	intron (NM_012700, intron 6 of 9)	-intron (NM_012700, intron 6 of 9)	10324	NM_139329	Hsd3b7
chr1	187107451	187108015	0.179292	10	0.0007943	0.00296458	intron (NM_012700, intron 1 of 9)	-intron (NM_012700, intron 1 of 9)	748	NM_012700	Stx1b
chr1	189040379	189040637	0.10387	10	0.0015164	0.00482882	Intergenic	Intergenic	521918	NM_001191631	Ppapdc1a
chr1	189382571	189382838	-0.234609	13	2.209e-08	1.37652e-06	Intergenic	Intergenic	206574	NM_012712	Fgfr2
chr1	190013244	190013586	-0.183915	10	2.4083e-06	5.33188e-05	intron (NM_001004415, intron 6 of 21)	-intron (NM_001004415, intron 6 of 21)	-80225	NM_001017464	Btbd16
chr1	190075866	190076219	-0.149785	10	0.0017337	0.00534535	intron (NM_001004415, intron 18 of 21)	-intron (NM_001004415, intron 18 of 21)	-17597	NM_001017464	Btbd16
chr1	190300639	190300936	0.20716	11	5.326e-07	1.72393e-05	intron (NM_031721, intron 3 of 8)	-intron (NM_031721, intron 3 of 8)	42889	NM_031721	Htra1
chr1	192544058	192544522	-0.101953	10	0.0044879	0.0110251	Intergenic	Intergenic	-51355	NM_053335	Ctbp2
chr1	192636365	192636707	-0.118076	10	0.010595	0.021338	Intergenic	Intergenic	-143601	NM_053335	Ctbp2
chr1	193864477	193864702	-0.204079	34	4.7184e-14	2.58907e-11	Intergenic	Intergenic	-15328	NM_001163214	LOC100302465
chr1	194542685	194542940	-0.150022	10	1.4443e-05	0.00019158	exon (NM_001143803, exon 2 of 4)	-exon (NM_001143803, exon 2 of 4)	20283	NM_001143803	Fam196a
chr1	195289363	195289599	0.127617	10	0.0065382	0.0147015	intron (NM_053767, intron 10 of 18)	-intron (NM_053767, intron 10 of 18)	25992	NM_053767	Ptpre
chr1	196309473	196309759	0.18147	11	3.2546e-06	6.66497e-05	Intergenic	Intergenic	-319750	NM_012861	Mgmt
chr1	196859790	196859919	0.142976	10	0.011602	0.0228149	intron (NM_012861, intron 3 of 4)	-intron (NM_012861, intron 3 of 4)	185577	NM_001108506	Ebf3
chr1	196932395	196932484	-0.115355	10	2.4002e-07	9.27142e-06	intron (NM_001108506, intron 15 of 16)	-intron (NM_001108506, intron 15 of 16)	112992	NM_001108506	Ebf3
chr1	197032392	197032616	0.128324	10	0.0015292	0.00486129	intron (NM_001108506, intron 7 of 16)	-intron (NM_001108506, intron 7 of 16)	12928	NM_001108506	Ebf3
chr1	197046975	197047368	-0.10779	10	6.9297e-06	0.000115196	Intergenic	Intergenic	-1740	NM_001108506	Ebf3
chr1	197050018	197050509	-0.135683	27	2.005e-07	8.0185e-06	Intergenic	Intergenic	-4832	NM_001108506	Ebf3
chr1	197051364	197051842	-0.125735	10	0.002487	0.007027	Intergenic	Intergenic	-6171	NM_001108506	Ebf3
chr1	198901335	198901759	0.121036	10	0.0081404	0.017381	intron (NM_001108922, intron 2 of 11)	-intron (NM_001108922, intron 2 of 11)	35513	NM_012933	Dpysl4
chr1	199560099	199560279	0.307414	12	4.1633e-14	2.58907e-11	Intergenic	Intergenic	-161288	NM_001107558	Nkx6-2
chr1	200190200	200191263	0.111703	14	0.00035612	0.0016506	Intergenic	Intergenic	-29214	NM_001000767	Olr289
chr1	201110431	201110588	0.236913	10	1.0007e-07	4.63761e-06	Intergenic	Intergenic	24751	NM_134375	Nlrp6
chr1	201134632	201135156	0.225348	10	1.9221e-10	2.86041e-08	intron (NM_030833, intron 1 of 1)	-intron (NM_030833, intron 1 of 1)	643	NM_030833	Ifitm2
chr1	201173436	201173704	-0.241677	11	6.5445e-09	5.14646e-07	Intergenic	Intergenic	19076	NM_001106314	Ifitm1
chr1	201199215	201199722	0.117549	10	0.00041447	0.0018446	exon (NM_001136124, exon 1 of 2)	-exon (NM_001136124, exon 1 of 2)	299	NM_001136124	Ifitm3
chr1	201323431	201323845	-0.115513	10	0.030027	0.0489221	Intergenic	Intergenic	-7148	NM_001106316	Ptdss2
chr1	201451950	201452357	-0.228382	12	2.7665e-09	2.57057e-07	exon (NM_139093, exon 13 of 17)	-exon (NM_139093, exon 13 of 17)	7602	NM_001033691	Irf7
chr1	201584869	201585184	-0.103078	11	0.004531	0.0111083	intron (NM_031811, intron 1 of 7)	-intron (NM_031811, intron 1 of 7)	2171	NM_031811	Taldo1
chr1	201596483	201597121	-0.102011	10	0.0098738	0.0202602	intron (NM_001107563, intron 7 of 7)	-intron (NM_001107563, intron 7 of 7)	4920	NM_001107563	Pddc1
chr1	201797809	201797966	-0.1214	10	3.066e-11	5.61394e-09	exon (NM_031008, exon 10 of 22)	-exon (NM_031008, exon 10 of 22)	56303	NM_031008	Ap2a2
chr1	202123294	202123972	-0.117438	10	0.0014055	0.00456717	Intergenic	Intergenic	71899	NM_001109159	Mob2
chr1	202587266	202587523	0.156901	11	6.2691e-10	7.41043e-08	Intergenic	Intergenic	44150	NM_134334	Ctsd
chr1	202592190	202592271	0.112314	10	0.00022685	0.00121137	Intergenic	Intergenic	39314	NM_134334	Ctsd
chr1	202732915	202733219	0.13963	12	0.00022986	0.0012229	intron (NM_001025420, intron 3 of 10)	-intron (NM_001025420, intron 3 of 10)	-12082	NM_001270673	Tnnt3
chr1	202824796	202825240	0.140093	12	1.8952e-05	0.000229866	promoter-TSS (NR_032754)	-promoter-TSS (NR_032754)	-433	NR_032754	Mir675
chr1	202848608	202848732	-0.168545	10	3.9604e-05	0.000376037	Intergenic	Intergenic	-23069	NR_027324	H19
chr1	203751683	203752010	0.258952	15	6.7507e-09	5.26078e-07	intron (NM_032073, intron 14 of 14)	-intron (NM_032073, intron 14 of 14)	85996	NM_001033757	Cdkn1c
chr1	204103352	204104184	0.103432	10	0.0045922	0.0112259	intron (NM_001015024, intron 1 of 21)	-intron (NM_001015024, intron 1 of 21)	16677	NM_001015024	Osbpl5
chr1	204319576	204319807	0.177375	10	9.6452e-06	0.000145508	Intergenic	Intergenic	74130	NM_022389	Dhcr7
chr1	204541679	204542177	0.188367	10	0.00010869	0.000735222	intron (NM_201350, intron 9 of 21)	-intron (NM_201350, intron 9 of 21)	-44435	NM_133441	Shank2
chr1	204633571	204634000	-0.124388	10	0.015152	0.0281257	intron (NM_133441, intron 4 of 15)	-intron (NM_201350, intron 12 of 21)	47423	NM_133441	Shank2
chr1	204745749	204746064	0.318382	10	1.3741e-10	2.12974e-08	intron (NM_001004133, intron 2 of 9)	-intron (NM_001004133, intron 2 of 9)	22967	NM_001004133	Shank2
chr1	204836279	204836595	0.104672	11	0.00064826	0.00254759	exon (NM_201350, exon 18 of 22)	-exon (NM_001004133, exon 6 of 10)	64784	NM_021868	Cttn
chr1	205623004	205623216	0.114903	10	0.0030384	0.00819565	Intergenic	Intergenic	35294	NM_145088	Rmt1
chr1	207705781	207706070	0.123382	10	0.00069531	0.0026836	promoter-TSS (NM_001107570)	-promoter-TSS (NM_001107570)	-288	NM_001107570	Tmem151a
chr1	208279625	208279846	0.14725	21	7.9288e-09	6.03186e-07	exon (NM_001004089, exon 7 of 15)	-exon (NM_001004089, exon 7 of 15)	5903	NM_001004089	Sipa1
chr1	209158590	209158743	-0.115781	10	0.01455	0.0272247	exon (NM_001110793, exon 13 of 13)	-exon (NM_001110793, exon 13 of 13)	-8034	NM_012638	Pygm
chr1	209323020	209323461	-0.162737	10	0.0018993	0.0057366	intron (NM_001034943, intron 6 of 9)	-intron (NM_001034943, intron 6 of 9)	4677	NM_001034943	Slc22a12
chr1	209327294	209327456	0.170482	12	8.8073e-07	2.54431e-05	exon (NM_001034943, exon 1 of 10)	-exon (NM_001034943, exon 1 of 10)	543	NM_001034943	Slc22a12
chr1	209743155	209743459	-0.114524	11	0.00068973	0.00266845	intron (NM_139337, intron 3 of 10)	-intron (NM_139337, intron 3 of 10)	12400	NM_139337	Macrod1
chr1	211338094	211338660	-0.124291	10	0.00017132	0.00100824	Intergenic	Intergenic	-13361	NM_080773	Chrm1
chr1	211497723	211498023	0.217574	10	7.9819e-09	6.05992e-07	exon (NM_001305220, exon 11 of 14)	-exon (NM_001305220, exon 11 of 14)	10282	NM_001305220	Hnrnpul2
chr1	212462785	212463150	0.106234	10	0.00018164	0.00104132	Intergenic	Intergenic	-11668	NM_134411	Rab3il1
chr1	212771340	212771908	-0.14677	11	0.0012541	0.00418283	intron (NM_001005886, intron 1 of 19)	-intron (NM_001005886, intron 1 of 19)	18630	NM_001005886	Dagla
chr1	213210154	213210613	-0.16871	10	0.00023798	0.00125378	TTS (NM_001107463)	-TTS (NM_001107463)	23893	NM_019295	Cd5
chr1	213329264	213329640	-0.12501	11	2.3997e-05	0.00026773	intron (NM_175577, intron 1 of 12)	-intron (NM_175577, intron 1 of 12)	142	NM_175577	Cd6
chr1	213341396	213341492	-0.119438	10	7.5952e-06	0.000122869	exon (NM_139341, exon 1 of 8)	-exon (NM_139341, exon 1 of 8)	122	NM_139341	Slc15a3
chr1	213542246	213542357	-0.235794	10	7.7432e-08	3.76294e-06	Intergenic	Intergenic	16575	NR_102351	LOC100910973
chr1	215475582	215476019	-0.141688	10	2.951e-06	6.20392e-05	Intergenic	Intergenic	-58922	NM_001047855	Dtx4
chr1	225865617	225865636	0.199531	10	0.0012693	0.00421816	intron (NM_001191562, intron 1 of 24)	-intron (NM_001191562, intron 1 of 24)	-147367	NR_031919	Mir204
chr1	227035736	227036011	0.140694	11	0.00016984	0.00100414	intron (NM_001105760, intron 2 of 6)	-intron (NM_001105760, intron 2 of 6)	11185	NM_001105760	Ptar1
chr1	227269376	227269550	0.26246	12	4.5297e-14	2.58907e-11	intron (NM_031779, intron 2 of 12)	-intron (NM_031779, intron 2 of 12)	162635	NM_031779	Apba1
chr1	227522136	227522416	-0.206088	10	8.5128e-08	4.08188e-06	intron (NM_053773, intron 1 of 30)	-intron (NM_053773, intron 1 of 30)	52181	NM_053773	Tjp2
chr1	228829314	228829838	-0.103573	11	0.00055017	0.00226368	intron (NM_001037197, intron 2 of 12)	-intron (NM_001037197, intron 2 of 12)	81455	NM_001037197	Kank1
chr1	230835690	230835832	-0.131636	10	7.8685e-10	8.87952e-08	exon (NM_001106370, exon 1 of 2)	-exon (NM_001106370, exon 1 of 2)	878	NM_001106370	Kcnv2
chr1	233762570	233762837	-0.137792	10	0.00013666	0.000866813	Intergenic	Intergenic	-15019	NM_001107585	Uhrf2
chr1	238602195	238602423	0.114338	10	0.0039981	0.0100899	Intergenic	Intergenic	-6861	NM_020096	Ifit1
chr1	240979521	240979863	-0.132833	11	0.00089502	0.00325559	Intergenic	Intergenic	17195	NM_001012072	Ppp1r3c
chr1	241737879	241738060	-0.111305	10	0.00083744	0.00308947	intron (NM_024385, intron 1 of 3)	-intron (NM_024385, intron 1 of 3)	1428	NM_024385	Hhex
chr1	245356775	245357072	0.209954	12	8.2803e-09	6.24836e-07	exon (NM_017365, exon 5 of 7)	-exon (NM_017365, exon 5 of 7)	-27493	NM_138512	Cyp2c22
chr1	245500538	245501036	0.193241	10	6.0821e-05	0.000501955	Intergenic	Intergenic	-101253	NM_017365	Pdlim1
chr1	245512157	245512661	-0.161813	10	0.00020209	0.00111882	Intergenic	Intergenic	-112875	NM_017365	Pdlim1
chr1	245704478	245704614	0.398939	10	4.4409e-14	2.58907e-11	intron (NM_001108524, intron 7 of 18)	-intron (NM_001108524, intron 7 of 18)	13652	NM_001108524	Aldh18a1
chr1	246186510	246186829	0.129773	13	0.00066317	0.00259115	Intergenic	Intergenic	-13186	NM_001012461	Dntt
chr1	246539266	246539663	-0.160286	10	0.00011657	0.0007745	intron (NM_001106368_1, intron 1 of 14)	-intron (NM_001106368_1, intron 1 of 14)	70183	NM_001106368_1	Pik3ap1
chr1	248517472	248517632	0.153166	10	1.4443e-05	0.00019158	intron (NM_134401, intron 2 of 14)	-intron (NM_134401, intron 2 of 14)	-57018	NR_037323	Mir3085
chr1	248531966	248532240	-0.104647	12	0.021226	0.0368753	intron (NM_134401, intron 3 of 14)	-intron (NM_134401, intron 3 of 14)	-42467	NR_037323	Mir3085
chr1	249417365	249417609	-0.133447	18	0.0016096	0.00505536	Intergenic	Intergenic	53973	NM_139192	Scd1
chr1	249723045	249723453	-0.104653	10	0.012263	0.0238647	Intergenic	Intergenic	-80806	NM_001106361	Pax2
chr1	250191750	250192190	0.118834	14	0.0020866	0.00617492	intron (NM_001033064, intron 2 of 4)	-intron (NM_001033064, intron 2 of 4)	2029	NM_001033064	Kazald1
chr1	250393072	250393483	-0.13128	10	0.00047142	0.00202193	Intergenic	Intergenic	9624	NM_001047108	Lbx1
chr1	250750474	250751097	-0.1026	10	0.00070153	0.00270203	intron (NM_001107600, intron 6 of 8)	-intron (NM_001107600, intron 6 of 8)	23799	NM_001013905	Dpcd
chr1	251530729	251530921	-0.1319	12	0.00014098	0.000886984	exon (NM_134370, exon 13 of 18)	-exon (NM_134370, exon 13 of 18)	9266	NM_001008349	Nfkb2
chr1	251602719	251603295	-0.121252	11	0.0065704	0.0147695	exon (NM_001106364, exon 2 of 11)	-exon (NM_001106364, exon 2 of 11)	8090	NM_001106364	Actr1a
chr1	251757302	251757663	0.14219	10	6.4676e-06	0.0001097	intron (NM_022700, intron 4 of 4)	-intron (NM_022700, intron 4 of 4)	32593	NM_001128083	Trim8
chr1	251932268	251932630	0.181271	12	1.3307e-05	0.000181275	intron (NM_001127484, intron 1 of 3)	-intron (NM_001127484, intron 1 of 3)	30889	NM_001127484	Wbp1l
chr1	251957673	251957831	0.110909	10	1.2777e-05	0.000176241	exon (NM_001127484, exon 4 of 4)	-exon (NM_001127484, exon 4 of 4)	13697	NM_012753	Cyp17a1
chr1	252783060	252783340	-0.176929	10	1.4604e-05	0.000192988	intron (NM_001107606, intron 1 of 13)	-intron (NM_001107606, intron 1 of 13)	13576	NM_001107606	Sh3pxd2a
chr1	252824741	252825639	0.109353	12	0.0039952	0.0100899	Intergenic	Intergenic	-28414	NM_001107606	Sh3pxd2a
chr1	252937336	252937427	-0.266166	10	9.9893e-12	2.10808e-09	Intergenic	Intergenic	-17132	NM_019349	Slk
chr1	253196313	253196594	-0.115695	10	0.00061891	0.00247491	Intergenic	Intergenic	-32093	NM_001007602	Gsto1
chr1	253286669	253286943	0.106046	10	0.0080236	0.0171948	Intergenic	Intergenic	20762	NR_037378	Mir3584
chr1	253334495	253334719	0.258648	10	0.00014644	0.000909086	Intergenic	Intergenic	-27039	NR_037378	Mir3584
chr1	253335598	253335743	-0.100626	12	4.2981e-08	2.382e-06	Intergenic	Intergenic	-28103	NR_037378	Mir3584
chr1	259150531	259150788	0.110755	11	0.0008231	0.00304589	Intergenic	Intergenic	-10979	NM_131913	Xpnpep1
chr1	259324852	259325168	0.277777	10	1.2777e-05	0.000176241	Intergenic	Intergenic	-65031	NM_013160_1	Mxi1
chr1	260002357	260002529	-0.11555	10	0.00015998	0.000963482	intron (NM_001107611, intron 1 of 13)	-intron (NM_001107611, intron 1 of 13)	96898	NM_001107611	Rbm20
chr1	260072673	260072776	-0.192596	10	7.5131e-10	8.52999e-08	intron (NM_001107611, intron 1 of 13)	-intron (NM_001107611, intron 1 of 13)	-110923	NM_022265	Pdcd4
chr1	261482648	261482949	0.118414	14	0.0038144	0.00973852	promoter-TSS (NM_001106200)	-promoter-TSS (NM_001106200)	-195	NM_001106200	Tectb
chr1	262064006	262064436	0.154483	12	6.49e-05	0.000522572	intron (NM_001191052, intron 4 of 14)	-intron (NM_001191052, intron 4 of 14)	32398	NM_001191052	Tcf7l2
chr1	262307094	262307678	0.120787	17	5.8547e-09	4.74383e-07	Intergenic	Intergenic	-249060	NM_001001505	Habp2
chr1	263119735	263119840	0.115028	14	3.9739e-06	7.71904e-05	Intergenic	Intergenic	-11189	NM_001106202	Tdrd1
chr1	264499502	264499621	0.258823	10	9.3561e-08	4.36303e-06	Intergenic	Intergenic	375924	NM_012959	Gfra1
chr1	264750035	264750563	0.172659	13	2.6764e-05	0.000289102	intron (NM_012959, intron 4 of 9)	-intron (NM_012959, intron 4 of 9)	125187	NM_012959	Gfra1
chr1	264938240	264938718	-0.106758	14	0.0041887	0.0104593	intron (NM_001014169, intron 1 of 8)	-intron (NM_001014169, intron 1 of 8)	180	NM_001014169	Ccdc172
chr1	266188449	266188554	0.102087	12	0.016366	0.0298817	Intergenic	Intergenic	184245	NM_001109169	Emx2
chr10	2344573	2344666	-0.335473	14	4.6629e-14	2.58907e-11	Intergenic	Intergenic	555866	NM_001270415	Parn
chr10	4264521	4264570	0.147995	10	0.0014911	0.00476287	intron (NM_001003978, intron 4 of 14)	-intron (NM_001003978, intron 4 of 14)	15350	NM_001003978	Gspt1
chr10	4886061	4886309	0.135025	11	0.00032987	0.00155498	Intergenic	Intergenic	66848	NM_145879	Socs1
chr10	5820892	5821198	0.183255	11	3.7568e-06	7.405e-05	intron (NM_012573, intron 4 of 13)	-intron (NM_012573, intron 4 of 13)	232816	NM_012573	Grin2a
chr10	6746342	6746643	-0.150956	10	0.00047576	0.0020354	Intergenic	Intergenic	63629	NM_001106972	RGD1309748
chr10	6988163	6988857	0.122395	10	0.0026526	0.00737825	intron (NM_152790, intron 1 of 3)	-intron (NM_152790, intron 1 of 3)	1927	NM_152790	Carhsp1
chr10	11057289	11057453	-0.174649	10	0.0063007	0.0142645	intron (NM_001109382, intron 1 of 1)	-intron (NM_001191639, intron 9 of 27)	220	NM_001109382	Vasn
chr10	11200258	11200506	-0.115776	10	1.1682e-05	0.000165852	Intergenic	Intergenic	56325	NM_001108267	Tfap4
chr10	13287949	13288394	0.22883	15	1.1265e-08	8.01314e-07	promoter-TSS (NM_182949)	-promoter-TSS (NM_182949)	-809	NM_182949	Prss27
chr10	13827022	13827851	0.131297	10	9.7309e-05	0.000683873	exon (NM_001257352, exon 15 of 46)	-exon (NM_001257352, exon 15 of 46)	25992	NM_001257352	Pkd1
chr10	13971224	13971321	0.23827	10	1.0825e-12	3.0402e-10	exon (NM_001106987, exon 4 of 4)	-exon (NM_001106987, exon 4 of 4)	1761	NM_001106987	Rnf151
chr10	14645234	14645542	0.190728	12	5.4565e-05	0.000469299	intron (NM_153814, intron 1 of 33)	-intron (NM_153814, intron 1 of 33)	27777	NM_175593	Tpsg1
chr10	14742239	14742575	0.103108	10	0.012606	0.0243887	intron (NM_012882, intron 1 of 1)	-intron (NM_012882, intron 1 of 1)	4662	NM_012882	Sstr5
chr10	15031384	15031624	0.101446	10	0.018746	0.0334042	Intergenic	Intergenic	-8681	NM_031658	Msln
chr10	15208061	15208352	0.105638	10	8.4168e-06	0.000132823	Intergenic	Intergenic	-3915	NM_001007607	Pigq
chr10	15233173	15233447	0.132256	12	0.0021535	0.00632487	intron (NM_001106990, intron 1 of 11)	-intron (NM_001106990, intron 1 of 11)	11807	NM_001106990	Capn15
chr10	15549877	15550301	-0.13199	10	5.5979e-05	0.000473716	TTS (NM_001024269)	-TTS (NM_001024269)	9454	NM_001013853	LOC287167
chr10	15764186	15764616	0.25505	10	2.4083e-06	5.33188e-05	Intergenic	Intergenic	85608	NM_017021	Il9r
chr10	16833426	16833919	0.249183	10	1.0905e-06	2.94104e-05	Intergenic	Intergenic	-69094	NM_053578	Atp6v0e1
chr10	16848603	16848977	0.176764	10	0.00025444	0.00129678	Intergenic	Intergenic	-84211	NM_053578	Atp6v0e1
chr10	17022696	17023005	-0.103545	13	0.0073199	0.0160731	intron (NM_001142652, intron 3 of 4)	-intron (NM_001142652, intron 3 of 4)	25397	NM_001142652	Neurl1b
chr10	17030382	17030488	-0.139574	14	4.7104e-05	0.00042133	exon (NM_001142652, exon 2 of 5)	-exon (NM_001142652, exon 2 of 5)	17813	NM_001142652	Neurl1b
chr10	17199611	17199791	-0.125456	10	0.00067091	0.00261346	Intergenic	Intergenic	-151453	NM_001142652	Neurl1b
chr10	17263972	17264290	0.132533	10	0.00033464	0.00157112	Intergenic	Intergenic	109479	NM_001191091	Efcab9
chr10	17886795	17887346	-0.114371	10	0.0023691	0.006792	Intergenic	Intergenic	175643	NM_012992	Npm1
chr10	20023909	20024207	0.107457	10	0.010669	0.0214523	intron (NM_031321, intron 2 of 36)	-intron (NM_031321, intron 2 of 36)	40892	NM_031321	Slit3
chr10	20325957	20326195	0.126437	10	0.0012372	0.00413318	intron (NM_031321, intron 5 of 36)	-intron (NM_031321, intron 5 of 36)	-161356	NR_031930	Mir218-2
chr10	20576235	20576390	-0.142003	13	5.3856e-08	2.84505e-06	exon (NM_031321, exon 37 of 37)	-exon (NM_031321, exon 37 of 37)	88881	NR_031930	Mir218-2
chr10	20738568	20738777	0.105511	10	0.02054	0.0358821	intron (NM_001105777, intron 3 of 17)	-intron (NM_001105777, intron 3 of 17)	6811	NM_001105777	Rars
chr10	21745390	21745569	0.186443	10	3.7399e-06	7.37574e-05	intron (NM_020088, intron 3 of 29)	-intron (NM_020088, intron 3 of 29)	350080	NM_020088	Tenm2
chr10	21860752	21861028	0.153083	12	1.8624e-06	4.45081e-05	intron (NM_020088, intron 2 of 29)	-intron (NM_020088, intron 2 of 29)	234670	NM_020088	Tenm2
chr10	29772705	29773134	-0.104318	10	0.025053	0.0421458	intron (NM_053820, intron 2 of 15)	-intron (NM_053820, intron 2 of 15)	3131	NM_053820	Ebf1
chr10	31328629	31328904	0.174852	12	8.3285e-05	0.000618232	intron (NM_001106996, intron 27 of 29)	-intron (NM_001106996, intron 27 of 29)	-28470	NM_001106995	Nipal4
chr10	34304083	34304624	0.128531	10	0.01838	0.0328413	exon (NM_214834, exon 1 of 1)	-exon (NM_214834, exon 1 of 1)	432	NM_214834	Olr1386
chr10	35422824	35423216	0.119781	10	0.0030626	0.00824723	intron (NM_001108273, intron 1 of 13)	-intron (NM_001108273, intron 1 of 13)	19781	NM_001108273	Rasgef1c
chr10	35452043	35452352	0.106144	10	0.024426	0.0412526	intron (NM_001108273, intron 6 of 13)	-intron (NM_001108273, intron 6 of 13)	48959	NM_001108273	Rasgef1c
chr10	35702579	35702867	-0.104813	11	8.6608e-05	0.000633954	exon (NM_001108274, exon 8 of 22)	-exon (NM_001108274, exon 8 of 22)	15970	NM_001108274	Tbc1d9b
chr10	36111263	36111672	0.130079	10	0.0025072	0.00706111	Intergenic	Intergenic	-57187	NM_001137622	Adamts2
chr10	36694525	36694691	-0.112863	21	0.0081496	0.017393	Intergenic	Intergenic	40202	NM_052798	Zfp354a
chr10	37117768	37117949	-0.102533	12	0.00038278	0.00173984	TTS (NM_001128196)	-TTS (NM_001128196)	5318	NM_031330	Hnrnpab
chr10	37377795	37377991	-0.109391	10	0.013409	0.025646	intron (NM_001106998, intron 1 of 11)	-intron (NM_001106998, intron 1 of 11)	2038	NM_001106998	Jade2
chr10	40744653	40745280	0.121968	10	0.0044196	0.0108924	intron (NM_022954, intron 1 of 22)	-intron (NM_022954, intron 1 of 22)	4442	NM_022954	Fat2
chr10	41213679	41214066	-0.153597	10	9.8295e-05	0.0006886	Intergenic	Intergenic	-192106	NM_013133	Glra1
chr10	43256177	43256425	-0.113887	10	0.016642	0.0302761	intron (NM_130742, intron 1 of 11)	-intron (NM_130742, intron 1 of 11)	18890	NM_130742	Galnt10
chr10	43746415	43746750	0.20374	11	1.4084e-07	6.13862e-06	intron (NM_001008382, intron 5 of 7)	-intron (NM_001008382, intron 5 of 7)	7693	NM_001008382	Cnot8
chr10	44911439	44912255	0.129745	10	0.0025072	0.00706111	exon (NM_001000774, exon 1 of 1)	-exon (NM_001000774, exon 1 of 1)	563	NM_001000774	Olr1450
chr10	45144916	45144935	0.294455	10	6.3248e-09	5.04808e-07	Intergenic	Intergenic	37085	NM_001000022	Olr1461
chr10	45170845	45171266	-0.118752	10	0.0013703	0.00447655	exon (NM_001107004, exon 5 of 5)	-exon (NM_001107004, exon 5 of 5)	21106	NM_001107004	Zfp39
chr10	45204016	45204208	-0.105864	10	0.00021208	0.00115703	Intergenic	Intergenic	-11950	NM_001107004	Zfp39
chr10	45334057	45334566	0.15125	10	0.00061891	0.00247491	Intergenic	Intergenic	63729	NM_001108276	Trim11
chr10	45846836	45847162	-0.105394	10	0.025532	0.0428185	Intergenic	Intergenic	-3225	NM_001191642	Nlrp3
chr10	46184493	46185202	0.136572	12	0.00044369	0.00194521	intron (NM_001105785, intron 2 of 4)	-intron (NM_001105785, intron 2 of 4)	10042	NM_001105785	Nt5m
chr10	46862255	46862668	0.104273	10	0.00075993	0.00286521	exon (NM_001008279, exon 22 of 30)	-exon (NM_001008279, exon 22 of 30)	11734	NM_001008279	Flii
chr10	47703651	47703899	-0.157543	11	2.3129e-06	5.1857e-05	exon (NM_001033914, exon 3 of 10)	-exon (NM_001305628, exon 4 of 11)	2665	NM_021852	Epn2
chr10	47832583	47832752	-0.18267	10	2.4966e-06	5.48525e-05	exon (NM_001107007, exon 12 of 15)	-exon (NM_001107007, exon 12 of 15)	20306	NM_001025749	Grap
chr10	47843228	47843391	-0.124212	14	2.1877e-06	4.98275e-05	intron (NM_001107007, intron 9 of 14)	-intron (NM_001107007, intron 9 of 14)	30948	NM_001025749	Grap
chr10	48413720	48414073	0.187192	10	5.313e-06	9.61048e-05	Intergenic	Intergenic	-7698	NM_017161	Adora2b
chr10	48704825	48705194	-0.18597	10	0.0042529	0.0105786	Intergenic	Intergenic	-33492	NM_138895	Ubb
chr10	48751248	48751526	-0.196834	14	4.4187e-14	2.58907e-11	Intergenic	Intergenic	12885	NM_138895	Ubb
chr10	49142959	49143279	-0.142069	16	1.1195e-07	5.11206e-06	Intergenic	Intergenic	82456	NM_001107568_1	Tvp23b
chr10	54501293	54501466	0.296814	10	1.8756e-12	4.90761e-10	Intergenic	Intergenic	-14320	NM_021848	Glp2r
chr10	55241482	55241942	-0.142389	11	0.00047728	0.00204143	exon (NM_001191923, exon 6 of 18)	-exon (NM_001191923, exon 6 of 18)	13840	NM_001191923	Pik3r5
chr10	55661628	55662014	0.121648	10	0.0059367	0.0136254	promoter-TSS (NM_001304534)	-promoter-TSS (NM_001304534)	-336	NM_001304534	Rpl26
chr10	55823136	55823707	0.127075	10	0.00089835	0.00326389	Intergenic	Intergenic	-2438	NM_001109648	Tmem107
chr10	56026851	56027091	-0.117325	14	1.7094e-05	0.000215714	intron (NM_024380, intron 1 of 19)	-intron (NM_024380, intron 1 of 19)	319	NM_024380	Gucy2e
chr10	56194958	56195474	-0.123643	13	2.9284e-07	1.07768e-05	exon (NM_001108829, exon 15 of 18)	-exon (NM_001108829, exon 15 of 18)	-2486	NM_001128155	Tmem88
chr10	56249164	56249651	0.203637	10	0.00058109	0.00236211	Intergenic	Intergenic	-47269	NM_001108829	Kdm6b
chr10	56522524	56523028	-0.135845	10	0.00041831	0.00185726	Intergenic	Intergenic	-9723	NM_001001513	Tnfsf12
chr10	56811776	56811932	0.111658	10	0.0044879	0.0110251	intron (NM_031702, intron 2 of 4)	-intron (NM_031702, intron 2 of 4)	907	NM_031702	Cldn7
chr10	57355494	57355639	-0.201481	10	2.5621e-07	9.76552e-06	exon (NM_001107015, exon 4 of 5)	-exon (NM_001107015, exon 4 of 5)	3755	NM_001191823	Vmo1
chr10	58827954	58828160	0.135545	10	0.011442	0.0225764	Intergenic	Intergenic	62436	NM_021590	Aipl1
chr10	59340766	59341057	0.108961	10	6.0821e-05	0.000501955	exon (NM_001144991, exon 8 of 14)	-exon (NM_001144991, exon 8 of 14)	15264	NM_031668	Mybbp1a
chr10	59852740	59853129	0.118336	12	1.6026e-05	0.000205782	promoter-TSS (NM_012914)	-promoter-TSS (NM_012914)	-428	NM_012914	Atp2a3
chr10	59870732	59871080	-0.116814	10	0.0006245	0.00247711	intron (NM_012914, intron 12 of 20)	-intron (NM_012914, intron 12 of 20)	17543	NM_012914	Atp2a3
chr10	60091903	60092504	0.128561	10	0.0061163	0.0139332	intron (NM_001033682, intron 5 of 6)	-intron (NM_001033682, intron 5 of 6)	16343	NM_001033682	Shpk
chr10	60979032	60979279	-0.109088	10	3.207e-06	6.58555e-05	Intergenic	Intergenic	-13167	NM_001000716	Olr1496
chr10	61306962	61307277	-0.122622	10	8.8845e-05	0.000644143	exon (NM_001000033, exon 1 of 1)	-exon (NM_001000033, exon 1 of 1)	543	NM_001000033	Olr1507
chr10	63240289	63240494	0.225933	10	2.4966e-06	5.48525e-05	intron (NM_133591, intron 3 of 8)	-intron (NM_133591, intron 3 of 8)	25176	NM_133591	Rph3al
chr10	63383404	63383686	-0.223059	12	7.3335e-10	8.42856e-08	TTS (NM_001007611)	-TTS (NM_001007611)	7134	NM_001007611	Fam101b
chr10	63390962	63391589	0.108112	10	0.018994	0.0337704	promoter-TSS (NM_001007611)	-promoter-TSS (NM_001007611)	-597	NM_001007611	Fam101b
chr10	65101159	65101568	0.145926	11	6.3811e-09	5.0789e-07	Intergenic	Intergenic	-22678	NM_012976	Lgals5
chr10	65218154	65218883	0.178096	11	1.449e-05	0.000192135	intron (NM_001108284, intron 3 of 17)	-intron (NM_001108284, intron 3 of 17)	-66467	NM_012977	Lgals9
chr10	65378362	65378387	-0.263197	10	2.812e-10	3.91928e-08	Intergenic	Intergenic	52450	NM_001025664	Wsb1
chr10	65914677	65915056	-0.148481	10	0.00010131	0.000703258	promoter-TSS (NR_031952)	-promoter-TSS (NR_031952)	-81	NR_031952	Mir365
chr10	66788762	66789324	0.137495	19	1.3461e-06	3.47724e-05	Intergenic	Intergenic	-67343	NM_001107024	Ssh2
chr10	67439552	67439603	0.135816	12	0.00013375	0.000853555	intron (NM_053584, intron 8 of 8)	-intron (NM_053584, intron 8 of 8)	32375	NM_053584	Gosr1
chr10	67501823	67502346	-0.107733	10	0.0042203	0.010515	promoter-TSS (NM_001039163)	-promoter-TSS (NM_001039163)	99	NM_001039163	Tusc5
chr10	72764569	72765098	-0.107832	10	3.8291e-06	7.50411e-05	intron (NM_053720, intron 5 of 12)	-intron (NM_053720, intron 5 of 12)	29661	NM_053720	Aatf
chr10	72921046	72921362	-0.107201	10	0.002131	0.00627013	Intergenic	Intergenic	-115405	NM_145880	Lhx1
chr10	73031845	73032063	0.113496	10	0.0015683	0.00495816	Intergenic	Intergenic	68062	NM_001108832	Mrm1
chr10	73065179	73065436	-0.118244	10	8.6182e-05	0.000632361	Intergenic	Intergenic	34708	NM_001108832	Mrm1
chr10	73105117	73105253	-0.178805	16	2.9119e-08	1.71559e-06	intron (NM_001014119, intron 2 of 6)	-intron (NM_001014119, intron 2 of 6)	-5169	NM_001108832	Mrm1
chr10	74081357	74081524	-0.112127	13	0.00031944	0.00151865	Intergenic	Intergenic	-3762	NM_001107033	Tbx2
chr10	74082436	74082702	0.123123	10	0.0015422	0.0048918	Intergenic	Intergenic	-2634	NM_001107033	Tbx2
chr10	74088071	74088621	-0.155326	10	2.0776e-05	0.000244655	intron (NM_001107033, intron 3 of 6)	-intron (NM_001107033, intron 3 of 6)	3143	NM_001107033	Tbx2
chr10	74138439	74138680	0.151134	12	0.00017507	0.00102145	intron (NM_001107034, intron 1 of 8)	-intron (NM_001107034, intron 1 of 8)	2144	NM_001107034	Tbx4
chr10	74200142	74200255	0.203752	11	0.0016445	0.00513991	Intergenic	Intergenic	63783	NM_001107034	Tbx4
chr10	74412869	74413045	0.146786	10	0.00068301	0.0026501	Intergenic	Intergenic	73047	NM_001100630	Ints2
chr10	75907228	75907325	0.147226	16	1.063e-06	2.89193e-05	TTS (NM_001105827)	-TTS (NM_001105827)	23752	NM_001105827	Mtmr4
chr10	75907345	75907433	0.286985	12	1.9899e-12	5.09101e-10	TTS (NM_001105827)	-TTS (NM_001105827)	23864	NM_001105827	Mtmr4
chr10	76070363	76070523	0.103161	10	0.0060709	0.0138619	Intergenic	Intergenic	-15429	NM_001107036	Mpo
chr10	76294815	76295085	0.116793	12	1.8453e-06	4.42565e-05	Intergenic	Intergenic	-23042	NM_080697	Dynll2
chr10	76317454	76318168	-0.109083	14	0.0002444	0.00127041	Intergenic	Intergenic	-22853	NM_001109552	Srsf1
chr10	76488954	76489126	0.198808	10	0.0001275	0.00082254	TTS (NM_001013971)	-TTS (NM_001013971)	-11581	NM_001108289	Mrps23
chr10	76529771	76529843	-0.117677	10	0.0045922	0.0112259	Intergenic	Intergenic	29186	NM_001108289	Mrps23
chr10	76530712	76531069	0.115608	12	0.00031591	0.00150746	Intergenic	Intergenic	30270	NM_001108289	Mrps23
chr10	79065187	79065486	-0.118506	12	0.00032975	0.00155461	intron (NM_001253859, intron 7 of 15)	-intron (NM_001253859, intron 7 of 15)	24694	NM_001253859	Tom1l1
chr10	82198013	82198172	0.110945	11	0.0016445	0.00513991	Intergenic	Intergenic	344572	NM_001135039	Utp18
chr10	82585363	82586148	0.13853	12	4.1272e-05	0.00038667	intron (NM_031833, intron 2 of 4)	-intron (NM_031833, intron 2 of 4)	2513	NM_031833	Nme2
chr10	83031178	83031596	-0.144056	10	0.0033407	0.0088331	promoter-TSS (NM_080581)	-promoter-TSS (NM_080581)	-588	NM_080581	Abcc3
chr10	83353982	83354414	0.134592	13	1.9958e-05	0.0002381	Intergenic	Intergenic	-42910	NM_022296	Xylt2
chr10	83636686	83636960	0.267206	15	1.1491e-09	1.23887e-07	exon (NM_053304, exon 48 of 51)	-exon (NM_053304, exon 48 of 51)	14385	NM_053304	Col1a1
chr10	83641533	83642302	-0.109154	13	0.00021593	0.00117277	Intergenic	Intergenic	-10205	NM_001109565	Hils1
chr10	83643029	83643330	-0.13328	10	0.00053562	0.0022198	Intergenic	Intergenic	-8943	NM_001109565	Hils1
chr10	83652654	83652868	-0.134491	15	1.0211e-05	0.000151972	exon (NM_001109565, exon 1 of 1)	-exon (NM_001109565, exon 1 of 1)	638	NM_001109565	Hils1
chr10	83804001	83804287	-0.126244	10	0.0041237	0.0103301	intron (NM_001105832, intron 2 of 2)	-intron (NM_001105832, intron 2 of 2)	1975	NM_001105832	Dlx3
chr10	84290087	84290478	-0.20239	10	0.00015534	0.00094195	Intergenic	Intergenic	-9277	NM_012610	Ngfr
chr10	84453593	84453831	-0.126387	14	5.7269e-05	0.000482556	exon (NM_001080207, exon 1 of 5)	-exon (NM_001080207, exon 1 of 5)	828	NM_001080207	Zfp652
chr10	85087147	85088010	-0.111884	12	0.0018883	0.0057103	Intergenic	Intergenic	11051	NM_001107042	Hoxb3
chr10	85088015	85088292	-0.112974	13	3.9043e-07	1.35537e-05	Intergenic	Intergenic	11626	NM_001107042	Hoxb3
chr10	86084109	86084308	-0.123397	10	2.2424e-05	0.000257328	Intergenic	Intergenic	37668	NM_001105834	Mrpl45
chr10	86190519	86191042	-0.187033	12	1.246e-07	5.59397e-06	Intergenic	Intergenic	129893	NM_019378	Srcin1
chr10	86247076	86247166	-0.134299	18	4.1171e-07	1.41088e-05	Intergenic	Intergenic	73553	NM_019378	Srcin1
chr10	87698566	87699031	0.120994	12	0.00084433	0.00311216	TTS (NM_001108298)	-TTS (NM_001108298)	14306	NM_001108298	Cdc6
chr10	87749702	87750187	-0.213081	17	2.9078e-09	2.67525e-07	intron (NM_031528, intron 4 of 7)	-intron (NM_031528, intron 4 of 7)	9466	NM_031528	Rara
chr10	87762140	87762276	0.139506	10	0.00098882	0.00349635	Intergenic	Intergenic	21729	NM_031528	Rara
chr10	87841196	87841351	-0.172169	10	0.0015552	0.00492717	Intergenic	Intergenic	18845	NM_001004274	Igfbp4
chr10	87903152	87903644	-0.206762	15	1.2974e-07	5.76926e-06	Intergenic	Intergenic	32927	NM_199489	Ccr7
chr10	88240611	88240898	0.106916	12	0.00061848	0.00247491	promoter-TSS (NM_001008823)	-promoter-TSS (NM_001008823)	-56	NM_001008823	Krt26
chr10	88274284	88274493	-0.11914	11	0.000258	0.00130992	exon (NM_001008760, exon 5 of 7)	-exon (NM_001008760, exon 5 of 7)	3904	NM_001008760	Krt28
chr10	88278271	88278400	0.195563	10	3.6099e-06	7.1915e-05	promoter-TSS (NM_001008760)	-promoter-TSS (NM_001008760)	-43	NM_001008760	Krt28
chr10	89030929	89031296	0.188531	10	2.0327e-05	0.000241423	TTS (NM_001008820)	-TTS (NM_001008820)	3573	NM_001008820	Krt35
chr10	89194904	89195557	0.122619	13	0.0073924	0.0161952	intron (NM_001008816, intron 4 of 7)	-intron (NM_001008816, intron 4 of 7)	4496	NM_001008816	Krt42
chr10	89520852	89521066	-0.13361	14	4.5441e-13	1.42635e-10	exon (NM_012809, exon 2 of 4)	-exon (NM_012809, exon 2 of 4)	1540	NM_012809	Cnp
chr10	89524906	89525506	-0.113256	10	4.8406e-06	8.96435e-05	exon (NM_012809, exon 4 of 4)	-exon (NM_012809, exon 4 of 4)	5787	NM_012809	Cnp
chr10	89647254	89647581	-0.129351	10	0.0020964	0.00619124	intron (NM_001107050, intron 6 of 17)	-intron (NM_001107050, intron 6 of 17)	2535	NM_001107050	Kat2a
chr10	89814177	89814595	0.113375	10	0.0038161	0.00973852	intron (NM_017064, intron 13 of 18)	-intron (NM_017064, intron 13 of 18)	18982	NM_017064	Stat5a
chr10	90185332	90185468	-0.152898	15	2.5523e-09	2.40692e-07	exon (NM_001037202, exon 11 of 13)	-exon (NM_001037202, exon 11 of 13)	6705	NM_001037202	Plekhh3
chr10	90186089	90186435	-0.104219	10	0.0007667	0.00288317	intron (NM_001037202, intron 8 of 12)	-intron (NM_001037202, intron 8 of 12)	5843	NM_001037202	Plekhh3
chr10	90201260	90201833	-0.105877	10	0.013501	0.025785	intron (NM_032061, intron 6 of 21)	-intron (NM_032061, intron 6 of 21)	3357	NM_032061	Cntnap1
chr10	91065538	91065747	-0.445052	17	4.7296e-14	2.58907e-11	intron (NM_053668, intron 15 of 18)	-intron (NM_053668, intron 15 of 18)	20594	NM_053668	Mpp3
chr10	91065922	91066045	-0.163307	11	2.3773e-05	0.000266185	intron (NM_053668, intron 15 of 18)	-intron (NM_053668, intron 15 of 18)	20253	NM_053668	Mpp3
chr10	91541598	91542147	0.139651	10	0.002131	0.00627013	exon (NM_017113, exon 13 of 13)	-exon (NM_017113, exon 13 of 13)	5738	NM_001145842	Grn
chr10	91780013	91780122	0.176046	12	0.00018034	0.00103682	Intergenic	Intergenic	33297	NM_001100728	Ccdc43
chr10	92239004	92239409	-0.103896	10	0.016753	0.0304454	exon (NM_001105845, exon 9 of 15)	-exon (NM_001105845, exon 9 of 15)	36226	NM_001105845	Plcd3
chr10	92378879	92379063	0.1514	10	0.0029199	0.0079385	exon (NM_001105846, exon 13 of 25)	-exon (NM_001105846, exon 13 of 25)	25854	NM_001005531	Spata32
chr10	92387631	92388575	-0.120901	13	0.0019839	0.00594073	Intergenic	Intergenic	16722	NM_001005531	Spata32
chr10	92884711	92885087	-0.103469	14	0.0008018	0.0029866	exon (NM_001107055, exon 3 of 4)	-exon (NM_001107055, exon 3 of 4)	16742	NM_001107055	Wnt9b
chr10	92962901	92963201	-0.138073	27	2.6659e-12	6.68318e-10	exon (NM_001105715, exon 3 of 5)	-exon (NM_001105715, exon 3 of 5)	37446	NM_001105715	Wnt3
chr10	92964170	92964612	-0.193643	26	1.543e-11	3.03346e-09	intron (NM_001105715, intron 4 of 4)	-intron (NM_001105715, intron 4 of 4)	38786	NM_001105715	Wnt3
chr10	94868538	94869290	0.154066	10	0.0010061	0.00354302	Intergenic	Intergenic	-13137	NM_001013973	March10
chr10	94925548	94925853	0.151239	10	6.813e-05	0.000538595	Intergenic	Intergenic	-66406	NM_001191653	Tanc2
chr10	95574151	95574424	0.10068	10	0.0022934	0.00661662	intron (NM_182820, intron 2 of 10)	-intron (NM_182820, intron 2 of 10)	12504	NM_182820	Strada
chr10	96323703	96324283	-0.176485	14	1.3077e-06	3.39394e-05	Intergenic	Intergenic	30383	NM_053483	Kpna2
chr10	97106731	97107142	-0.120294	10	0.0017193	0.00530796	intron (NM_019255, intron 2 of 3)	-intron (NM_019255, intron 2 of 3)	11463	NM_019255	Cacng1
chr10	97200329	97200441	-0.103195	10	0.016422	0.0299546	intron (NM_080692, intron 1 of 3)	-intron (NM_080692, intron 1 of 3)	14059	NM_080692	Cacng4
chr10	98315277	98315364	0.12724	10	7.0464e-07	2.1451e-05	exon (NM_024355, exon 7 of 11)	-exon (NM_024355, exon 7 of 11)	20855	NM_024355	Axin2
chr10	98539125	98539375	-0.107293	11	0.005377	0.0126447	Intergenic	Intergenic	113630	NM_019224	Rgs9
chr10	98593452	98593562	0.306818	10	3.5053e-10	4.6762e-08	Intergenic	Intergenic	59373	NM_019224	Rgs9
chr10	98593594	98593732	-0.111744	15	0.00093578	0.0033694	Intergenic	Intergenic	59217	NM_019224	Rgs9
chr10	101173428	101173645	0.189181	13	7.5299e-06	0.000122342	Intergenic	Intergenic	598552	NM_017296	Kcnj2
chr10	102388210	102388320	-0.21315	10	3.4423e-11	6.15216e-09	intron (NM_080403, intron 1 of 1)	-intron (NM_080403, intron 1 of 1)	794	NM_080403	Sox9
chr10	102650352	102650773	-0.116773	10	0.0008674	0.00317834	Intergenic	Intergenic	150787	NR_031941	Mir297
chr10	102681660	102681906	0.119805	10	0.0010783	0.00373149	Intergenic	Intergenic	119567	NR_031941	Mir297
chr10	104052545	104052855	-0.117554	10	0.0063948	0.014439	Intergenic	Intergenic	-492944	NM_001077592	Rpl38
chr10	104517899	104518189	-0.124539	11	0.0060436	0.0138139	Intergenic	Intergenic	-27600	NM_001077592	Rpl38
chr10	105312649	105312851	0.115545	10	0.012263	0.0238647	intron (NM_001191655, intron 9 of 9)	-intron (NM_001191655, intron 9 of 9)	28226	NM_012575	Grin2c
chr10	105501918	105502059	-0.144908	12	0.0028749	0.00784872	Intergenic	Intergenic	-2576	NM_019383_1	Atp5h
chr10	105520591	105520703	0.122933	10	0.00044209	0.00194047	Intergenic	Intergenic	-21234	NM_019383_1	Atp5h
chr10	105527570	105527650	-0.205154	10	1.7513e-07	7.24433e-06	Intergenic	Intergenic	-16246	NM_001109568	Slc16a5
chr10	105900212	105900683	0.110527	10	0.0036418	0.00939968	TTS (NM_001107065)	-TTS (NM_001107065)	2675	NR_037369	Mir3577
chr10	105911681	105912340	-0.113036	12	0.0035911	0.00931387	intron (NM_001107065, intron 2 of 19)	-intron (NM_001107065, intron 2 of 19)	3307	NM_001107065	Caskin2
chr10	105990512	105990700	-0.163776	10	0.0012693	0.00421816	Intergenic	Intergenic	-17065	NM_001277479	Smim5
chr10	106060312	106060673	-0.153839	10	0.0020793	0.00615534	intron (NM_001108305, intron 4 of 10)	-intron (NM_001108305, intron 4 of 10)	-19959	NM_013180	Itgb4
chr10	106115624	106115873	0.112492	10	0.00057586	0.00234468	intron (NM_013180, intron 38 of 40)	-intron (NM_013180, intron 38 of 40)	5202	NM_001008282	Galk1
chr10	106223282	106223478	-0.189818	10	1.3212e-05	0.000180047	Intergenic	Intergenic	-7644	NM_001109585	Trim47
chr10	106253564	106253996	-0.117608	10	0.0080236	0.0171948	Intergenic	Intergenic	-8278	NM_001009369	Mrpl38
chr10	106338408	106339004	0.239605	16	2.0616e-11	3.99e-09	exon (NM_001107066, exon 22 of 22)	-exon (NM_001107066, exon 22 of 22)	14511	NM_001107066	Evpl
chr10	106339051	106339228	-0.16026	10	3.4432e-06	6.93658e-05	exon (NM_001107066, exon 22 of 22)	-exon (NM_001107066, exon 22 of 22)	14077	NM_001107066	Evpl
chr10	106369227	106369424	0.176808	10	5.2516e-06	9.541e-05	intron (NM_001108840, intron 8 of 15)	-intron (NM_001108840, intron 8 of 15)	-16109	NM_001107066	Evpl
chr10	106618197	106618584	0.167117	12	7.185e-05	0.000558314	Intergenic	Intergenic	-14319	NM_022545	Prpsap1
chr10	106659083	106659433	-0.116417	10	0.0048073	0.0116292	Intergenic	Intergenic	17784	NM_133386	Sphk1
chr10	106721365	106721851	0.119674	10	0.0056763	0.0131677	intron (NM_001107067, intron 6 of 18)	-intron (NM_001107067, intron 6 of 18)	12237	NM_012818	Aanat
chr10	106722109	106722353	-0.122364	12	0.011809	0.0231367	intron (NM_001107067, intron 5 of 18)	-intron (NM_001107067, intron 5 of 18)	12860	NM_012818	Aanat
chr10	106761384	106761994	0.142894	13	0.00070861	0.00272238	intron (NM_130744, intron 3 of 3)	-intron (NM_130744, intron 3 of 3)	7962	NM_130744	Cygb
chr10	106796992	106797085	-0.130947	10	1.6496e-05	0.000209512	intron (NM_001031652, intron 6 of 8)	-intron (NM_001031652, intron 6 of 8)	14307	NM_001031652	St6galnac2
chr10	107055259	107055473	0.130835	13	0.00011129	0.000749147	intron (NM_001107068, intron 9 of 17)	-intron (NM_001107068, intron 9 of 17)	35497	NM_001107068	Mgat5b
chr10	107228390	107228941	0.109052	10	0.00034096	0.00159338	intron (NM_001108309, intron 2 of 16)	-intron (NM_001108309, intron 2 of 16)	7932	NM_001108309	Sec14l1
chr10	107234762	107235132	-0.117223	12	0.0051328	0.0122297	intron (NM_001108309, intron 2 of 16)	-intron (NM_001108309, intron 2 of 16)	14213	NM_001108309	Sec14l1
chr10	107307961	107308376	-0.118028	10	0.0050698	0.0121105	Intergenic	Intergenic	-35503	NM_176856	Sept9
chr10	107440343	107440649	0.30144	10	1.1302e-13	4.44383e-11	intron (NM_031837, intron 2 of 10)	-intron (NM_031837, intron 2 of 10)	-4822	NM_001113497	Sept9
chr10	107470503	107471199	-0.163957	10	2.6959e-05	0.00029062	intron (NM_001113497, intron 5 of 9)	-intron (NM_031837, intron 6 of 10)	25533	NM_001113497	Sept9
chr10	107582519	107582848	-0.101035	13	0.0028936	0.00789199	Intergenic	Intergenic	137366	NM_001113497	Sept9
chr10	107638335	107638779	0.122056	10	0.0052255	0.0123905	Intergenic	Intergenic	193239	NM_001113497	Sept9
chr10	108062770	108062897	0.156924	10	5.966e-09	4.81313e-07	Intergenic	Intergenic	-103504	NM_053565	Socs3
chr10	108259853	108260555	0.119232	13	0.0058191	0.013424	Intergenic	Intergenic	-6785	NM_053910	Cyth1
chr10	108269663	108269716	-0.176863	13	0.00028853	0.00141159	intron (NM_001107069, intron 16 of 19)	-intron (NM_001107069, intron 16 of 19)	-16271	NM_053910	Cyth1
chr10	108309097	108309215	-0.403867	10	3.169e-08	1.83807e-06	Intergenic	Intergenic	-12772	NM_001107069	Usp36
chr10	108426961	108427243	0.125301	10	0.025693	0.0430402	Intergenic	Intergenic	-4882	NM_001007675	C1qtnf1
chr10	108442337	108442833	0.171094	10	9.7419e-08	4.53162e-06	intron (NM_001007675, intron 1 of 3)	-intron (NM_001007675, intron 1 of 3)	10601	NM_001007675	C1qtnf1
chr10	108446966	108447031	-0.323658	10	4.1744e-14	2.58907e-11	intron (NM_001007675, intron 1 of 3)	-intron (NM_001007675, intron 1 of 3)	15015	NM_001007675	C1qtnf1
chr10	108516848	108517139	-0.102269	12	0.001065	0.00370159	promoter-TSS (NM_001134498)	-promoter-TSS (NM_001134498)	13	NM_001134498	Rbfox3
chr10	109451253	109451862	0.108725	10	0.022338	0.0383487	intron (NM_001168703, intron 1 of 14)	-intron (NM_001168703, intron 1 of 14)	4624	NM_001168703	Aatk
chr10	109603343	109604024	-0.100786	10	0.012095	0.0235857	Intergenic	Intergenic	93053	NM_001195482	LOC690871
chr10	109604764	109604924	-0.110097	13	0.0002571	0.00130606	Intergenic	Intergenic	94213	NM_001195482	LOC690871
chr10	109605160	109605328	0.109866	10	0.012869	0.0248024	Intergenic	Intergenic	94613	NM_001195482	LOC690871
chr10	109647049	109647322	-0.111887	21	7.0663e-06	0.000116688	Intergenic	Intergenic	129148	NM_001127449	Actg1
chr10	110051445	110051640	-0.112464	10	0.010745	0.0215714	intron (NM_001013975, intron 4 of 11)	-intron (NM_001013975, intron 4 of 11)	2563	NM_001013975	Notum
chr10	110093501	110094017	0.147813	10	0.00089835	0.00326389	Intergenic	Intergenic	-39653	NM_001013975	Notum
chr10	110433170	110433446	0.126381	10	0.0029905	0.00809216	intron (NM_001013976, intron 2 of 8)	-intron (NM_001013976, intron 2 of 8)	3501	NM_001013976	Ogfod3
chr11	3859427	3860214	-0.101689	14	0.0023143	0.00666971	Intergenic	Intergenic	643287	NM_001047102	Cadm2
chr11	23957152	23957189	-0.182578	10	1.0677e-05	0.000157015	Intergenic	Intergenic	-353533	NM_001034004	Jam2
chr11	25440201	25440506	0.11424	10	0.00095499	0.00342011	exon (NM_024400, exon 2 of 9)	-exon (NM_024400, exon 2 of 9)	2790	NM_024400	Adamts1
chr11	29785723	29786048	0.131887	10	2.6383e-05	0.000286062	exon (NM_001037347, exon 10 of 20)	-exon (NM_001037347, exon 10 of 20)	30456	NM_017050	Sod1
chr11	29921657	29922051	0.303364	12	5.4263e-12	1.22365e-09	Intergenic	Intergenic	-105512	NM_017050	Sod1
chr11	29984065	29984480	-0.109413	12	0.00073311	0.00279268	Intergenic	Intergenic	-139479	NM_001100558	Tiam1
chr11	30190215	30190525	0.121244	10	0.0095299	0.0196767	intron (NM_001100558, intron 9 of 24)	-intron (NM_001100558, intron 9 of 24)	66618	NM_001100558	Tiam1
chr11	30246632	30246808	0.102651	10	0.00050717	0.00213337	intron (NM_001100558, intron 23 of 24)	-intron (NM_001100558, intron 23 of 24)	122968	NM_001100558	Tiam1
chr11	30720509	30720889	-0.163128	13	6.7041e-06	0.000112548	promoter-TSS (NM_001135834)	-promoter-TSS (NM_001135834)	-84	NM_001135834	Mrap
chr11	31422744	31423313	-0.252707	10	2.7344e-07	1.02651e-05	Intergenic	Intergenic	-31760	NM_001271316	Ifnar1
chr11	31487810	31487953	-0.117865	10	7.4344e-08	3.70705e-06	Intergenic	Intergenic	-20839	NM_001108313	Ifngr2
chr11	32718336	32718438	-0.116215	12	0.0059553	0.0136631	exon (NM_017325, exon 2 of 6)	-exon (NM_017325, exon 2 of 6)	7017	NM_017325	Runx1
chr11	32718448	32718608	-0.404012	12	4.1078e-14	2.58907e-11	intron (NM_017325, intron 1 of 5)	-intron (NM_017325, intron 1 of 5)	6876	NM_017325	Runx1
chr11	34278979	34279259	-0.105549	10	0.0060709	0.0138619	Intergenic	Intergenic	-57095	NM_001107108	Sim2
chr11	36753755	36754116	0.123698	10	0.0042858	0.0106434	intron (NM_001006990, intron 8 of 8)	-intron (NM_001006990, intron 8 of 8)	55051	NM_001006990	Igsf5
chr11	43763953	43764122	-0.122097	18	0.0007974	0.00297496	promoter-TSS (NM_001013866)	-promoter-TSS (NM_001013866)	50	NM_001013866	Cmss1
chr11	43825137	43825188	-0.168706	10	7.0635e-10	8.16851e-08	intron (NM_001013866, intron 1 of 9)	-intron (NM_001013866, intron 1 of 9)	61175	NM_001013866	Cmss1
chr11	53935503	53935831	-0.148854	24	1.3423e-13	5.06454e-11	Intergenic	Intergenic	-282265	NM_001172090	Morc1
chr11	56502703	56503151	-0.12995	10	0.00098882	0.00349635	Intergenic	Intergenic	-65830	NM_001123352	Abhd10
chr11	58399095	58399336	0.125709	10	0.00092223	0.00332831	intron (NM_001305153, intron 5 of 7)	-intron (NM_001305153, intron 5 of 7)	12780	NM_001305153	Qtrtd1
chr11	58736324	58736864	0.104924	14	0.0029793	0.00807179	intron (NM_001105880, intron 7 of 12)	-intron (NM_001105880, intron 7 of 12)	-92560	NR_032745	Mir568
chr11	63509943	63510407	0.12426	10	0.0020454	0.00607859	intron (NM_001013120, intron 4 of 6)	-intron (NM_001013120, intron 4 of 6)	130266	NM_001013120	Igsf11
chr11	63856250	63856437	-0.325353	10	7.1376e-08	3.5883e-06	intron (NM_001105879, intron 1 of 11)	-intron (NM_001105879, intron 1 of 11)	41428	NM_001105879	Arhgap31
chr11	63857122	63857401	-0.150967	14	9.9663e-06	0.000149563	intron (NM_001105879, intron 1 of 11)	-intron (NM_001105879, intron 1 of 11)	42346	NM_001105879	Arhgap31
chr11	64151127	64151288	-0.288244	23	4.5963e-14	2.58907e-11	Intergenic	Intergenic	19074	NM_199113	Popdc2
chr11	66183588	66184111	0.139359	10	0.00021004	0.0011492	Intergenic	Intergenic	-30558	NM_016996	Casr
chr11	66873980	66874200	0.109534	10	0.0042529	0.0105786	intron (NM_001012017, intron 3 of 8)	-intron (NM_001012017, intron 3 of 8)	44375	NM_001012017	Dirc2
chr11	68547776	68548108	0.134667	12	1.7138e-06	4.17584e-05	intron (NM_032062, intron 37 of 59)	-intron (NM_032062, intron 37 of 59)	-71893	NM_001025402	Umps
chr11	68573515	68574111	-0.111302	12	0.00073311	0.00279268	exon (NM_032062, exon 49 of 60)	-exon (NM_032062, exon 49 of 60)	-46022	NM_001025402	Umps
chr11	68687408	68687742	0.153164	10	8.7191e-07	2.52222e-05	intron (NM_147139, intron 8 of 14)	-intron (NM_147139, intron 8 of 14)	67740	NM_001025402	Umps
chr11	69483207	69483735	0.231502	10	1.5609e-05	0.000201885	exon (NM_001108843, exon 17 of 17)	-exon (NM_001108843, exon 17 of 17)	63662	NM_001108843	Lmln
chr11	69846149	69846353	-0.155103	10	0.00078039	0.00292376	Intergenic	Intergenic	37976	NM_001107089	Muc20
chr11	69937256	69938139	0.12296	10	0.0052651	0.0124583	intron (NM_001008336, intron 9 of 14)	-intron (NM_001008336, intron 9 of 14)	29156	NM_001008336	Tnk2
chr11	70064249	70064492	0.162245	10	0.00018884	0.00106842	Intergenic	Intergenic	40926	NM_001039259	Zdhhc19
chr11	70101587	70101844	0.134775	10	0.0016082	0.00505266	intron (NM_001039259, intron 6 of 8)	-intron (NM_001039259, intron 6 of 8)	3581	NM_001039259	Zdhhc19
chr11	70103981	70104188	0.15233	10	0.00052597	0.00219025	intron (NM_001039259, intron 2 of 8)	-intron (NM_001039259, intron 2 of 8)	1212	NM_001039259	Zdhhc19
chr11	70487677	70487887	-0.137498	10	0.0031863	0.00850188	Intergenic	Intergenic	21120	NM_138865	Cep19
chr11	71017411	71017740	-0.137708	10	0.0013022	0.00430528	Intergenic	Intergenic	-87202	NM_012788	Dlg1
chr11	71047930	71048250	-0.169563	10	0.00052597	0.00219025	Intergenic	Intergenic	117605	NM_053995	Bdh1
chr11	71418563	71418859	0.127838	10	0.0018527	0.0056277	intron (NM_001034006, intron 1 of 23)	-intron (NM_001034006, intron 1 of 23)	7005	NM_001034006	Acap2
chr11	72447030	72447539	0.191511	10	3.4432e-06	6.93658e-05	Intergenic	Intergenic	62966	NM_001107085	Cpn2
chr11	73159151	73159616	-0.108203	14	0.0032941	0.00873214	intron (NM_001191658, intron 1 of 29)	-intron (NM_001191658, intron 1 of 29)	44570	NM_001191658	Atp13a4
chr11	73475850	73476112	-0.122027	10	0.0058052	0.013396	Intergenic	Intergenic	-36647	NM_001105871	Hrasls
chr11	78185879	78186135	-0.200404	12	3.9965e-05	0.00037907	intron (NM_001013864, intron 5 of 10)	-intron (NM_001013864, intron 5 of 10)	230865	NM_001013864	Lpp
chr11	80736222	80736448	0.156469	10	0.0048073	0.0116292	intron (NM_013126, intron 21 of 25)	-intron (NM_013126, intron 21 of 25)	-109951	NM_001107082	Etv5
chr11	81895770	81895920	-0.265306	10	2.9971e-08	1.76023e-06	Intergenic	Intergenic	150487	NM_001105868	Ephb3
chr11	82205333	82205698	-0.122779	11	0.0041828	0.0104557	Intergenic	Intergenic	-159184	NM_001105868	Ephb3
chr11	84369535	84369752	0.146871	18	0.0011607	0.00393999	promoter-TSS (NM_053930)	-promoter-TSS (NM_053930)	-151	NM_053930	Gp1bb
chr11	84606330	84606415	-0.139324	10	3.6099e-06	7.1915e-05	intron (NM_001131013, intron 2 of 17)	-intron (NM_001131013, intron 2 of 17)	33501	NM_001131013	Arvcf
chr11	86961984	86962357	-0.179204	44	4.3854e-14	2.58907e-11	Intergenic	Intergenic	27261	NM_001105860	Mzt2b
chr12	2551313	2551657	-0.136214	12	2.3647e-06	5.26079e-05	exon (NM_001144840, exon 12 of 18)	-exon (NM_001144840, exon 12 of 18)	17793	NM_139109	Xab2
chr12	2687239	2687427	0.13346	20	1.7097e-13	6.02476e-11	exon (NM_001109059, exon 1 of 7)	-exon (NM_001109059, exon 1 of 7)	420	NM_001109059	RGD1563425
chr12	2709055	2709594	-0.155574	10	0.00089052	0.00324072	exon (NM_001105902, exon 5 of 5)	-exon (NM_001105902, exon 5 of 5)	6564	NM_001105902	Pex11g
chr12	2935869	2936113	0.134552	10	0.027874	0.0459884	intron (NM_017071, intron 1 of 21)	-intron (NM_017071, intron 1 of 21)	1024	NM_017071	Insr
chr12	3672104	3672372	0.196151	12	1.6734e-09	1.67578e-07	exon (NM_001109060, exon 6 of 14)	-exon (NM_001109060, exon 6 of 14)	100133	NM_031336	Kl
chr12	4414410	4414632	0.13867	10	0.00010337	0.000713316	Intergenic	Intergenic	-90828	NM_031542	Brca2
chr12	4417368	4417843	-0.112647	10	0.0035853	0.00930141	Intergenic	Intergenic	-93913	NM_031542	Brca2
chr12	6048325	6048434	-0.187217	10	0.00027454	0.00136768	Intergenic	Intergenic	47795	NM_001134603	Tex26
chr12	7053425	7053697	-0.131728	10	0.0012372	0.00413318	intron (NM_001015030, intron 1 of 4)	-intron (NM_001015030, intron 1 of 4)	34076	NM_001015030	Ubl3
chr12	7316688	7317052	0.12885	13	0.0034696	0.00906928	Intergenic	Intergenic	-15276	NM_001100989	Mtus2
chr12	7607698	7607839	0.113857	10	0.010014	0.0204871	Intergenic	Intergenic	49556	NM_022861	Unc13a
chr12	7630685	7630950	0.146056	10	0.00063581	0.0025113	Intergenic	Intergenic	-68071	NM_001024968	Slc46a3
chr12	7768086	7768386	0.162147	10	8.6182e-05	0.000632361	Intergenic	Intergenic	-35692	NM_001100942	Pomp
chr12	7770923	7771190	-0.129413	10	0.0014662	0.00472088	Intergenic	Intergenic	-38513	NM_001100942	Pomp
chr12	7771455	7771547	0.11966	10	0.0042203	0.010515	Intergenic	Intergenic	-38957	NM_001100942	Pomp
chr12	8262521	8262739	0.328202	12	4.3876e-13	1.3889e-10	intron (NM_001100822, intron 20 of 23)	-intron (NM_001100822, intron 20 of 23)	-33473	NM_023963	Cdx2
chr12	8508091	8508469	0.157141	10	0.0023691	0.006792	Intergenic	Intergenic	-42870	NM_001191663	Gsx1
chr12	9115318	9115496	0.132804	10	0.00035727	0.00165264	intron (NM_145782, intron 2 of 12)	-intron (NM_145782, intron 2 of 12)	21199	NM_145782	Cyp3a18
chr12	9717384	9717599	0.11069	10	3.0582e-06	6.3498e-05	intron (NM_001107119, intron 1 of 5)	-intron (NM_001107119, intron 1 of 5)	1281	NM_001107119	Zkscan5
chr12	10038269	10038489	-0.114589	10	4.5661e-06	8.59552e-05	intron (NM_001109598, intron 17 of 17)	-intron (NM_001109598, intron 17 of 17)	88075	NM_001109598	Smurf1
chr12	10668338	10668540	-0.15109	10	0.00021004	0.0011492	exon (NM_001034140, exon 14 of 14)	-exon (NM_001034140, exon 14 of 14)	10266	NM_001009604	Bri3
chr12	10995697	10995874	0.127254	13	0.016698	0.0303735	intron (NM_001013867, intron 3 of 16)	-intron (NM_001013867, intron 3 of 16)	7069	NM_001013867	Rsph10b
chr12	11164421	11164605	-0.103485	13	4.4282e-05	0.000405408	exon (NM_001105909, exon 14 of 17)	-exon (NM_001105909, exon 14 of 17)	12979	NM_001105909	Usp42
chr12	11186943	11187539	0.113872	14	0.011995	0.0234446	intron (NM_053912, intron 4 of 11)	-intron (NM_053912, intron 4 of 11)	10904	NM_053912	Cyth3
chr12	11633712	11634001	-0.102877	10	0.0010238	0.00358979	Intergenic	Intergenic	-26400	NM_001107121	Zfp316
chr12	12185055	12185472	-0.111616	10	0.012869	0.0248024	intron (NM_001107123, intron 5 of 34)	-intron (NM_001107123, intron 5 of 34)	42669	NM_001107123	Tnrc18
chr12	12319652	12319828	0.184612	10	0.0002798	0.00138484	intron (NM_001007615, intron 2 of 11)	-intron (NM_001007615, intron 2 of 11)	15253	NM_001007615	Wipi2
chr12	12522545	12522652	-0.220469	10	1.5267e-05	0.000198908	exon (NM_001037219, exon 3 of 9)	-exon (NM_001037219, exon 3 of 9)	-16978	NM_001037220	Ap5z1
chr12	14415846	14416483	0.110014	16	0.00039186	0.00177391	Intergenic	Intergenic	-35843	NM_001047092	Amz1
chr12	14516101	14516573	0.195203	10	0.0009467	0.00339563	Intergenic	Intergenic	-10614	NM_133393	Lfng
chr12	14928584	14928855	-0.116532	13	1.2946e-05	0.000177915	intron (NM_001109387, intron 10 of 17)	-intron (NM_001109387, intron 10 of 17)	134821	NM_001109387	Mad1l1
chr12	15138142	15138425	0.109974	22	3.2488e-11	5.89089e-09	exon (NM_001105913, exon 2 of 2)	-exon (NM_001105913, exon 2 of 2)	63083	NM_001105913	Elfn1
chr12	15179364	15179763	0.143233	10	0.010447	0.0210968	intron (NM_001105913, intron 1 of 1)	-intron (NM_001105913, intron 1 of 1)	21803	NM_001105913	Elfn1
chr12	15301338	15301732	-0.168773	10	0.00016475	0.000984625	promoter-TSS (NM_001025413)	-promoter-TSS (NM_001025413)	-12	NM_001025413	Tmem184a
chr12	15702013	15702743	0.212277	18	2.2133e-10	3.22326e-08	intron (NM_001025033, intron 2 of 4)	-intron (NM_001025033, intron 2 of 4)	15964	NM_001025033	LOC498154
chr12	15706761	15707163	-0.102183	10	0.00033779	0.00158332	intron (NM_001025033, intron 2 of 4)	-intron (NM_001025033, intron 2 of 4)	12931	NM_133573	Gper1
chr12	16039163	16039474	0.270257	12	2.555e-09	2.40692e-07	intron (NM_001033679, intron 3 of 9)	-intron (NM_001033679, intron 3 of 9)	13452	NM_001033679	Prkar1b
chr12	16192348	16192830	0.163843	22	1.3838e-07	6.05259e-06	Intergenic	Intergenic	41544	NM_012801	Pdgfa
chr12	16819102	16819184	0.144058	10	1.4744e-07	6.35216e-06	exon (NM_001127246, exon 5 of 5)	-exon (NM_001127246, exon 5 of 5)	-1957	NM_144759	Asmt
chr12	16821291	16821371	0.127903	10	0.0011258	0.0038481	exon (NM_001127246, exon 2 of 5)	-exon (NM_001127246, exon 2 of 5)	766	NM_001127246	Akap17a
chr12	16824050	16824613	-0.249534	10	4.4069e-07	1.49104e-05	intron (NM_001105915, intron 2 of 6)	-intron (NM_001105915, intron 2 of 6)	1300	NM_001105915	Asmtl
chr12	19675647	19675946	-0.121473	10	0.0007667	0.00288317	intron (NM_019237, intron 3 of 8)	-intron (NM_019237, intron 3 of 8)	3024	NM_019237	Pcolce
chr12	19676372	19676805	0.129857	13	1.507e-07	6.43372e-06	exon (NM_019237, exon 3 of 9)	-exon (NM_019237, exon 3 of 9)	2232	NM_019237	Pcolce
chr12	19703707	19703987	0.103407	10	0.0013819	0.00450688	intron (NM_001127551, intron 16 of 17)	-intron (NM_001127551, intron 16 of 17)	7432	NM_032074	Irs3
chr12	21729391	21729590	0.152418	11	5.1147e-05	0.000447108	intron (NM_001109020, intron 1 of 5)	-intron (NM_001109020, intron 1 of 5)	2070	NM_001109020	Upk3bl
chr12	22396025	22396287	-0.125905	10	1.4443e-05	0.00019158	intron (NM_001100475, intron 13 of 30)	-intron (NM_001100475, intron 13 of 30)	-35224	NM_053622	Pom121
chr12	22717734	22718388	0.106256	11	0.021417	0.0371518	Intergenic	Intergenic	6465	NM_001109024	Dnajc30
chr12	22734568	22735304	0.111925	10	0.0089377	0.0186863	intron (NM_001135743, intron 10 of 11)	-intron (NM_001135743, intron 10 of 11)	10248	NM_001135743	Wbscr22
chr12	22735422	22735677	-0.115241	10	2.2779e-07	8.87241e-06	exon (NM_001135743, exon 12 of 12)	-exon (NM_001135743, exon 12 of 12)	10862	NM_001135743	Wbscr22
chr12	22746295	22747092	0.139351	10	0.0031363	0.00839726	intron (NM_053788, intron 6 of 9)	-intron (NM_053788, intron 6 of 9)	18370	NM_053788	Stx1a
chr12	23169136	23169534	-0.139264	10	6.3389e-05	0.000515117	Intergenic	Intergenic	-5219	NM_173840	Lat2
chr12	23349034	23349238	0.103819	10	3.022e-06	6.30267e-05	intron (NM_001001504, intron 1 of 26)	-intron (NM_001001504, intron 1 of 26)	29763	NM_001001504	Gtf2ird1
chr12	25801493	25801767	0.270827	10	4.6457e-10	5.80371e-08	Intergenic	Intergenic	-492650	NM_001025112	Wbscr17
chr12	25923096	25923305	-0.222361	10	1.0654e-08	7.71238e-07	Intergenic	Intergenic	-371079	NM_001025112	Wbscr17
chr12	26324090	26324427	0.152013	10	4.6386e-05	0.000416604	intron (NM_001025112, intron 1 of 9)	-intron (NM_001025112, intron 1 of 9)	29979	NM_001025112	Wbscr17
chr12	27103250	27103292	0.110642	12	0.0001176	0.000779915	intron (NM_001077201, intron 2 of 5)	-intron (NM_001077201, intron 2 of 5)	184232	NM_001077201	Caln1
chr12	27574344	27574982	-0.156703	10	3.2705e-05	0.000329992	Intergenic	Intergenic	-1291	NM_001128194	Kctd7
chr12	27698801	27698937	0.370045	10	5.0626e-14	2.58907e-11	intron (NM_053670, intron 1 of 5)	-intron (NM_053670, intron 1 of 5)	3872	NM_053670	Crcp
chr12	27966911	27967212	-0.247675	10	8.3337e-11	1.3653e-08	intron (NM_001017486, intron 10 of 10)	-intron (NM_001017486, intron 10 of 10)	17256	NM_001009679	Psph
chr12	28616626	28616881	0.19124	10	5.4729e-07	1.75175e-05	Intergenic	Intergenic	123167	NM_053439	Ran
chr12	28766860	28767084	-0.102328	12	0.0049582	0.0118789	intron (NM_012748, intron 4 of 9)	-intron (NM_012748, intron 4 of 9)	15381	NM_012748	Stx2
chr12	28948600	28948802	0.219216	10	2.4374e-06	5.37768e-05	intron (NM_001100488, intron 3 of 22)	-intron (NM_001100488, intron 3 of 22)	87790	NM_001108853	Piwil1
chr12	28987084	28987289	0.109814	12	6.7494e-05	0.000535039	intron (NM_001100488, intron 15 of 22)	-intron (NM_001100488, intron 15 of 22)	49304	NM_001108853	Piwil1
chr12	29881744	29881991	0.122014	12	0.0014181	0.00459692	intron (NM_198727, intron 3 of 8)	-intron (NM_198727, intron 3 of 8)	-229995	NM_144758	Slc15a4
chr12	32486017	32486244	0.11141	13	7.8536e-08	3.79994e-06	Intergenic	Intergenic	-76662	NM_001108334	Ncor2
chr12	32576712	32576999	-0.139414	10	4.088e-05	0.000384439	intron (NM_001108334, intron 1 of 46)	-intron (NM_001108334, intron 1 of 46)	14063	NM_001108334	Ncor2
chr12	32584586	32585220	0.103026	12	0.0088877	0.0186005	intron (NM_001108334, intron 1 of 46)	-intron (NM_001108334, intron 1 of 46)	22110	NM_001108334	Ncor2
chr12	32606256	32607103	-0.101155	12	0.0022353	0.00652	intron (NM_001108334, intron 1 of 46)	-intron (NM_001108334, intron 1 of 46)	43887	NM_001108334	Ncor2
chr12	32635306	32635516	0.13052	10	1.3212e-05	0.000180047	intron (NM_001108334, intron 5 of 46)	-intron (NM_001108334, intron 5 of 46)	72618	NM_001108334	Ncor2
chr12	32681435	32681776	-0.154668	10	0.00043804	0.00192586	intron (NM_001108334, intron 17 of 46)	-intron (NM_001108334, intron 17 of 46)	58074	NM_001109547	Fam101a
chr12	33379256	33379737	-0.122594	12	3.8551e-06	7.54715e-05	intron (NM_001109065, intron 2 of 2)	-intron (NM_001109065, intron 2 of 2)	11874	NM_001109065	RGD1563482
chr12	33497947	33498383	0.17274	10	0.00014358	0.000898625	intron (NM_001107139, intron 1 of 22)	-intron (NM_001107139, intron 1 of 22)	1463	NM_001107139	Pitpnm2
chr12	33842712	33842793	0.179036	10	0.00069531	0.0026836	Intergenic	Intergenic	-5233	NM_001145334	Gpr81
chr12	34208304	34209215	0.147599	16	5.5396e-08	2.90211e-06	TTS (NM_001105938)	-TTS (NM_001105938)	2303	NM_001105938	B3gnt4
chr12	34595410	34595497	-0.129739	10	1.6612e-07	6.94081e-06	Intergenic	Intergenic	22575	NM_001271309	Tmem120b
chr12	34630339	34630553	-0.136442	10	0.0017775	0.00545383	TTS (NM_001013982)	-TTS (NM_001013982)	-12417	NM_001271309	Tmem120b
chr12	35079601	35080112	-0.120443	14	0.0066079	0.0148288	exon (NM_019256, exon 12 of 13)	-exon (NM_019256, exon 12 of 13)	37295	NM_019256	P2rx7
chr12	35234158	35234563	0.246701	10	2.7251e-05	0.000292838	Intergenic	Intergenic	-32239	NM_001110139	Atp2a2
chr12	35455965	35456123	0.176173	10	0.0022199	0.00648065	intron (NM_001107141, intron 2 of 5)	-intron (NM_001107141, intron 2 of 5)	27627	NM_001107141	Pptc7
chr12	35698285	35698433	0.110982	10	0.014949	0.0278235	Intergenic	Intergenic	-26125	NM_001271380	Cux2
chr12	35791220	35791571	0.137955	10	0.0082588	0.0175758	intron (NM_001271380, intron 2 of 22)	-intron (NM_001271380, intron 2 of 22)	66912	NM_001271380	Cux2
chr12	35795972	35796285	0.111591	16	6.4512e-06	0.000109632	intron (NM_001271380, intron 2 of 22)	-intron (NM_001271380, intron 2 of 22)	71645	NM_001271380	Cux2
chr12	35842277	35842531	-0.230661	10	6.9583e-07	2.12479e-05	intron (NM_001271380, intron 2 of 22)	-intron (NM_001271380, intron 2 of 22)	-112275	NM_031621	Sh2b3
chr12	36117724	36117989	0.147902	11	0.0017051	0.00527589	Intergenic	Intergenic	-10681	NM_001164043	Mapkapk5
chr12	36312640	36313462	0.174431	12	0.0015814	0.00498807	intron (NM_053760, intron 8 of 11)	-intron (NM_053760, intron 8 of 11)	11227	NM_053760	Trafd1
chr12	36428097	36428422	0.189026	10	0.0058487	0.0134698	Intergenic	Intergenic	59160	NM_053971	Rpl6
chr12	36689875	36690408	0.149577	14	2.2422e-05	0.000257328	intron (NM_133518, intron 2 of 21)	-intron (NM_133518, intron 2 of 21)	11529	NM_133518	Rph3a
chr12	37046476	37046722	0.112782	13	0.00067529	0.00262943	Intergenic	Intergenic	33530	NM_001108335	Rasal1
chr12	37099344	37099600	-0.232955	10	1.9718e-07	7.91964e-06	Intergenic	Intergenic	18053	NM_001191548	Ddx54
chr12	37230180	37230596	0.104448	12	0.017391	0.0313895	exon (NM_001017488, exon 15 of 16)	-exon (NM_001017488, exon 15 of 16)	20310	NM_001017488	Slc8b1
chr12	37248682	37248992	0.125038	10	0.0016629	0.00517317	exon (NM_001017488, exon 2 of 16)	-exon (NM_001017488, exon 2 of 16)	1861	NM_001017488	Slc8b1
chr12	37283493	37283751	-0.139976	13	3.3023e-05	0.000332376	exon (NM_053962, exon 7 of 9)	-exon (NM_053962, exon 7 of 9)	4781	NM_053962	Sds
chr12	37605380	37606196	0.1623	15	1.4998e-07	6.41719e-06	Intergenic	Intergenic	-273531	NM_139036	Lhx5
chr12	38611388	38611638	0.21328	14	1.8814e-10	2.82233e-08	Intergenic	Intergenic	-444843	NM_181638	Tbx3
chr12	39100815	39101179	0.153835	10	2.3934e-05	0.000267187	Intergenic	Intergenic	360718	NM_001109066	RGD1562310
chr12	39293903	39294249	-0.130348	10	0.0010238	0.00358979	Intergenic	Intergenic	167639	NM_001109066	RGD1562310
chr12	39714626	39714908	-0.207947	10	0.00024491	0.00127041	Intergenic	Intergenic	39125	NM_001108338	Fbxo21
chr12	39894504	39894792	0.122581	10	0.00029613	0.00143785	Intergenic	Intergenic	-25164	NM_052799	Nos1
chr12	40050705	40050904	0.258437	10	6.3505e-14	2.73609e-11	Intergenic	Intergenic	-181321	NM_052799	Nos1
chr12	40276923	40277231	-0.163201	12	4.5077e-05	0.000409375	Intergenic	Intergenic	-118865	NM_001107146	Rfc5
chr12	40579611	40580008	-0.197625	11	6.7464e-06	0.000113105	intron (NM_001024254, intron 2 of 19)	-intron (NM_001024254, intron 2 of 19)	71783	NM_001024254	Taok3
chr12	41311506	41311654	0.221514	10	6.2478e-06	0.000106954	Intergenic	Intergenic	-95586	NM_053612	Hspb8
chr12	41954767	41955026	0.110263	10	0.005719	0.013238	exon (NM_001029911, exon 9 of 47)	-exon (NM_001029911, exon 9 of 47)	64704	NM_001029911	Cit
chr12	42323508	42324227	-0.110749	25	1.9544e-06	4.5856e-05	exon (NM_001012147, exon 10 of 10)	-exon (NM_001012147, exon 10 of 10)	-4836	NM_022402	Rplp0
chr12	42357206	42357581	0.160309	10	1.3212e-05	0.000180047	intron (NM_001012147, intron 1 of 9)	-intron (NM_001012147, intron 1 of 9)	13113	NM_001012147	Pxn
chr12	42362605	42363029	0.137451	12	0.0042871	0.0106452	intron (NM_001012147, intron 1 of 9)	-intron (NM_001012147, intron 1 of 9)	7690	NM_001012147	Pxn
chr12	42396488	42396828	0.117575	15	1.9395e-08	1.24122e-06	exon (NM_001107147, exon 2 of 5)	-exon (NM_001107147, exon 2 of 5)	2122	NM_001107147	Sirt4
chr12	43001117	43001219	0.25185	10	3.2611e-09	2.94232e-07	intron (NM_001009682, intron 4 of 5)	-intron (NM_001009682, intron 4 of 5)	8170	NM_001009682	Oasl2
chr12	43097455	43097551	-0.149305	10	0.00015688	0.000948824	intron (NM_001012148, intron 6 of 14)	-intron (NM_001012148, intron 6 of 14)	18374	NM_001012148	Ankrd13a
chr12	43098482	43098911	-0.24407	10	6.6682e-08	3.40735e-06	intron (NM_001012148, intron 6 of 14)	-intron (NM_001012148, intron 6 of 14)	17180	NM_001012148	Ankrd13a
chr12	43150626	43150964	0.129899	10	0.0038161	0.00973852	exon (NM_001005553, exon 16 of 20)	-exon (NM_001005553, exon 16 of 20)	29897	NM_001191666	Tchp
chr12	43380230	43380451	-0.131925	10	5.5979e-05	0.000473716	exon (NM_001105935, exon 9 of 10)	-exon (NM_001105935, exon 9 of 10)	7754	NM_001105935	Foxn4
chr12	43521001	43521253	-0.113127	10	0.029843	0.0487014	exon (NM_001013124, exon 6 of 6)	-exon (NM_001013124, exon 6 of 6)	7746	NM_001013124	Ung
chr12	43789904	43790339	0.126798	10	0.0051862	0.0123185	intron (NM_001109327, intron 2 of 10)	-intron (NM_001109327, intron 2 of 10)	42934	NM_001109327	Coro1c
chr12	43818695	43819145	-0.149504	11	6.3481e-05	0.000515704	exon (NM_001109327, exon 11 of 11)	-exon (NM_001109327, exon 11 of 11)	-23348	NM_001013230	Selplg
chr12	44027842	44028094	-0.107489	10	0.0043522	0.0107768	Intergenic	Intergenic	-28559	NM_022218	Cmklr1
chr12	44184293	44184565	-0.133323	10	0.0072468	0.0159417	Intergenic	Intergenic	-71716	NM_001271178	Wscd2
chr12	44262525	44262914	0.105469	10	0.0031612	0.00844879	Intergenic	Intergenic	-67092	NM_001105937	Sgsm1
chr12	44316308	44316464	-0.368393	10	0.0011552	0.00392346	Intergenic	Intergenic	-13426	NM_001105937	Sgsm1
chr12	44339848	44340070	0.118973	10	0.020407	0.0356915	intron (NM_001105937, intron 2 of 24)	-intron (NM_001105937, intron 2 of 24)	10147	NM_001105937	Sgsm1
chr12	44424612	44425135	-0.13245	13	0.0028015	0.00769841	Intergenic	Intergenic	95062	NM_001105937	Sgsm1
chr12	44441222	44441544	0.20318	12	5.0986e-07	1.66913e-05	Intergenic	Intergenic	111571	NM_001105937	Sgsm1
chr12	44459770	44460308	0.113799	10	0.021771	0.0375808	Intergenic	Intergenic	130227	NM_001105937	Sgsm1
chr12	44498732	44499023	0.117309	10	0.0028737	0.00784716	Intergenic	Intergenic	169066	NM_001105937	Sgsm1
chr12	44505945	44506053	-0.134035	14	0.0023256	0.00669969	Intergenic	Intergenic	176187	NM_001105937	Sgsm1
chr12	44525800	44526339	-0.124346	12	0.0089362	0.0186863	Intergenic	Intergenic	196258	NM_001105937	Sgsm1
chr12	44554572	44554688	0.118909	13	0.0016963	0.00525607	Intergenic	Intergenic	224818	NM_001105937	Sgsm1
chr12	45185820	45186063	-0.350765	10	1.8385e-13	6.30032e-11	Intergenic	Intergenic	169173	NM_001191928	Mn1
chr12	45208954	45209334	-0.167815	16	2.0339e-07	8.11082e-06	Intergenic	Intergenic	145971	NM_001191928	Mn1
chr12	45352164	45352315	0.215718	10	9.0361e-10	9.98596e-08	exon (NM_001191928, exon 1 of 2)	-exon (NM_001191928, exon 1 of 2)	2875	NM_001191928	Mn1
chr12	45592248	45592601	0.108162	10	0.027529	0.0456126	Intergenic	Intergenic	-157681	NM_053742	Pitpnb
chr12	45933871	45933996	-0.145913	10	2.3507e-11	4.45714e-09	TTS (NM_053677)	-TTS (NM_053677)	31493	NM_053677	Chek2
chr12	46392374	46392677	-0.106188	19	1.193e-05	0.000168018	Intergenic	Intergenic	90854	NM_001270418	Lrcol1
chr12	46392802	46393184	-0.223747	10	9.6332e-05	0.000678922	Intergenic	Intergenic	90387	NM_001270418	Lrcol1
chr12	46709770	46709915	-0.261035	12	1.0896e-08	7.8176e-07	Intergenic	Intergenic	-12288	NM_001135840	Gtpbp6
chr12	46775143	46775243	0.232816	10	4.045e-05	0.00038174	Intergenic	Intergenic	53062	NM_001135840	Gtpbp6
chr13	8267698	8268234	0.196842	15	1.4361e-07	6.23752e-06	intron (NM_001047873, intron 11 of 23)	-intron (NM_001047873, intron 11 of 23)	553399	NM_001047873	Cntnap5b
chr13	19917512	19918038	0.122711	11	0.0041828	0.0104557	Intergenic	Intergenic	525198	NM_001305281	Dsel
chr13	21696909	21697198	0.155133	11	1.4032e-08	9.56455e-07	Intergenic	Intergenic	-1159176	NM_001047866	Cntnap5c
chr13	24866033	24866404	-0.143864	10	0.0018993	0.0057366	Intergenic	Intergenic	2009989	NM_001047866	Cntnap5c
chr13	30432104	30432453	0.129699	10	0.0013937	0.00453672	Intergenic	Intergenic	495813	NM_021762	Tsn
chr13	31715629	31716189	0.11512	10	0.011442	0.0225764	Intergenic	Intergenic	-108645	NM_001107169	Gli2
chr13	32173648	32174666	-0.104692	10	0.0041557	0.0103929	intron (NM_080771, intron 1 of 1)	-intron (NM_080771, intron 1 of 1)	2532	NM_080771	Inhbb
chr13	32632495	32632643	0.235963	10	0.00027454	0.00136768	Intergenic	Intergenic	-21406	NM_001100479	Ptpn4
chr13	33546162	33546428	0.138321	12	0.00012977	0.000833585	intron (NM_024395, intron 1 of 1)	-intron (NM_024395, intron 1 of 1)	11755	NM_024395	Htr5b
chr13	40660011	40660180	0.173308	10	4.3094e-05	0.000397946	Intergenic	Intergenic	-45612	NR_106676	Mir3473
chr13	40660397	40660562	-0.230238	17	5.6843e-14	2.73609e-11	Intergenic	Intergenic	-45228	NR_106676	Mir3473
chr13	40660705	40660858	-0.133956	11	0.00019767	0.00110355	Intergenic	Intergenic	-44926	NR_106676	Mir3473
chr13	42128505	42128524	-0.411491	10	4.774e-14	2.58907e-11	Intergenic	Intergenic	-202913	NM_001191669	Thsd7b
chr13	43351464	43351627	-0.129976	10	0.0011162	0.00382508	Intergenic	Intergenic	-3212	NM_022269	Cd55
chr13	43591376	43591424	0.215782	10	1.025e-06	2.81314e-05	Intergenic	Intergenic	-2835	NM_012516	C4bpa
chr13	44777057	44777366	0.164312	10	0.00098882	0.00349635	intron (NM_001108855, intron 2 of 2)	-intron (NM_001108855, intron 2 of 2)	10506	NM_001108855	Slc41a1
chr13	47697709	47697871	-0.109146	10	0.01505	0.0279808	exon (NM_012665, exon 8 of 8)	-exon (NM_012665, exon 8 of 8)	7272	NM_012665	Syt2
chr13	48104784	48105315	-0.122363	11	0.0017934	0.00548594	exon (NM_145683, exon 10 of 10)	-exon (NM_145683, exon 10 of 10)	-3192	NM_001109071	Arl8a
chr13	48111827	48112228	-0.129776	10	0.0007943	0.00296458	intron (NM_001109071, intron 1 of 6)	-intron (NM_001109071, intron 1 of 6)	3786	NM_001109071	Arl8a
chr13	48591531	48591878	0.215506	10	2.3258e-10	3.36727e-08	Intergenic	Intergenic	-157778	NM_001107180	Ipo9
chr13	48851122	48851491	-0.135059	10	0.0027391	0.00756086	intron (NM_001107942, intron 1 of 9)	-intron (NM_001107942, intron 1 of 9)	1047	NM_001107942	Lad1
chr13	48859472	48859654	-0.133955	10	0.0043522	0.0107768	exon (NM_001107942, exon 3 of 10)	-exon (NM_001107942, exon 3 of 10)	9303	NM_001107942	Lad1
chr13	49172365	49172477	0.12715	11	1.9361e-06	4.55425e-05	exon (NM_001105990, exon 13 of 37)	-exon (NM_001105990, exon 13 of 37)	10091	NM_001105990	Kif21b
chr13	49250417	49250774	-0.163255	10	4.0809e-07	1.40103e-05	intron (NM_001134502, intron 9 of 9)	-intron (NM_001134502, intron 9 of 9)	-3557	NM_001047926	LOC498236
chr13	49917825	49917924	-0.231462	12	2.9957e-06	6.26431e-05	Intergenic	Intergenic	130881	NM_021742	Nr5a2
chr13	52149243	52149411	-0.15152	10	3.1673e-05	0.000325291	intron (NM_181367, intron 5 of 6)	-intron (NM_181367, intron 5 of 6)	11595	NM_181367	Lhx9
chr13	57771477	57771959	0.140839	11	5.8034e-05	0.000487681	intron (NM_001012149, intron 12 of 12)	-intron (NM_001012149, intron 12 of 12)	122734	NM_053453	Rgs2
chr13	58659494	58659579	0.153913	10	2.5957e-07	9.85337e-06	Intergenic	Intergenic	-29940	NM_001047084	Rgs18
chr13	66075395	66075487	-0.119705	10	2.1902e-07	8.6298e-06	Intergenic	Intergenic	-152800	NM_001047085	Ivns1abp
chr13	66765263	66765697	-0.119806	18	2.8608e-05	0.00030427	Intergenic	Intergenic	111549	NM_001191671	Edem3
chr13	67562809	67563130	0.126207	10	0.0058926	0.0135467	intron (NM_001105957, intron 3 of 19)	-intron (NM_001105957, intron 3 of 19)	-174959	NM_001017492	Apobec4
chr13	68904353	68904439	-0.43551	10	4.6506e-12	1.09254e-09	Intergenic	Intergenic	4293	NM_198790	Rgsl2h
chr13	70018386	70018841	0.106438	10	0.0036418	0.00939968	Intergenic	Intergenic	42296	NM_001025137	Ier5
chr13	72061147	72061276	-0.174448	16	3.8862e-06	7.59609e-05	intron (NM_001100680, intron 7 of 10)	-intron (NM_001100680, intron 7 of 10)	22014	NM_001109383	Angptl1
chr13	72329034	72329435	-0.173057	10	0.00014078	0.000886622	Intergenic	Intergenic	204967	NM_001107188	Rasal2
chr13	72941508	72942046	0.112463	10	9.5365e-05	0.000673633	Intergenic	Intergenic	153955	NM_053571	Sec16b
chr13	79030962	79031044	0.153831	10	3.7265e-09	3.24466e-07	Intergenic	Intergenic	-2122	NM_153821	Prrx1
chr13	81515248	81515757	-0.216446	10	1.3065e-05	0.000178892	exon (NM_170789, exon 1 of 8)	-exon (NM_170789, exon 1 of 8)	120	NM_170789	Cd247
chr13	81600107	81600416	0.169484	11	7.0206e-06	0.000116238	Intergenic	Intergenic	84879	NM_170789	Cd247
chr13	83607067	83607271	0.102215	10	0.0017337	0.00534535	Intergenic	Intergenic	252646	NM_001105967	Lmx1a
chr13	85926046	85926421	0.171915	10	1.6178e-07	6.79069e-06	Intergenic	Intergenic	60903	NM_001191930	Uap1
chr13	86732556	86732617	-0.1085	10	0.00034417	0.00160537	Intergenic	Intergenic	13599	NM_022248	Dusp12
chr13	86911613	86911969	0.14834	12	9.7819e-06	0.000146976	promoter-TSS (NM_053843)	-promoter-TSS (NM_053843)	-48	NM_053843	Fcgr2a
chr13	86954430	86954646	0.168661	13	9.0883e-08	4.26832e-06	Intergenic	Intergenic	-23511	NM_001135992	LOC498276
chr13	87533851	87533915	-0.208314	10	1.3593e-08	9.33344e-07	Intergenic	Intergenic	20470	NM_022259	Cd244
chr13	87965974	87966053	0.152038	10	7.4097e-07	2.21243e-05	intron (NM_001105969, intron 8 of 8)	-intron (NM_001105969, intron 8 of 8)	22350	NM_001105969	Vangl2
chr13	88315535	88315606	0.131498	10	0.001963	0.00589042	exon (NM_053834, exon 3 of 5)	-exon (NM_053834, exon 3 of 5)	3304	NM_053834	Kcnj9
chr13	88489336	88489689	0.114367	10	0.0064901	0.0146127	intron (NM_001107197, intron 2 of 20)	-intron (NM_001107197, intron 2 of 20)	2274	NM_001107197	Igsf9
chr13	91072035	91072309	-0.10146	10	0.011205	0.0222014	intron (NM_019343, intron 2 of 17)	-intron (NM_019343, intron 2 of 17)	139348	NM_019343	Rgs7
chr13	93557169	93557702	-0.156859	10	8.0644e-08	3.89689e-06	Intergenic	Intergenic	-97280	NM_001109549	LOC689766
chr13	96682533	96682920	0.101051	12	0.0083692	0.0177561	intron (NM_001134496, intron 5 of 22)	-intron (NM_001134496, intron 5 of 22)	11200	NM_001134496	Tmem63a
chr13	97547132	97547233	-0.140011	10	1.3448e-06	3.47724e-05	Intergenic	Intergenic	153303	NM_001166578	Cnih3
chr13	100693013	100693297	-0.142256	10	1.4282e-09	1.45758e-07	Intergenic	Intergenic	-1497	NM_001077674	Hlx
chr13	100798799	100799038	-0.114531	10	6.5425e-06	0.00011068	exon (NM_001100811, exon 3 of 7)	-exon (NM_001100811, exon 3 of 7)	7339	NM_001100811	Marc1
chr13	101734642	101734949	-0.117967	12	0.00030046	0.00145339	Intergenic	Intergenic	259929	NM_001105985	Slc30a10
chr13	102977469	102977840	-0.109587	10	0.0080236	0.0171948	Intergenic	Intergenic	-105503	NM_001108858	Ddx3y
chr13	103082965	103083197	-0.120729	12	0.00043447	0.00191445	promoter-TSS (NM_001108858)	-promoter-TSS (NM_001108858)	-77	NM_001108858	Ddx3y
chr13	104423614	104423683	0.157401	10	0.020943	0.0364786	Intergenic	Intergenic	-58158	NM_001302219	Ush2a
chr13	105294226	105294436	0.308859	10	8.368e-10	9.35838e-08	Intergenic	Intergenic	-138626	NM_001107199	Kctd3
chr13	105574490	105574713	0.12414	10	0.00063013	0.00249388	promoter-TSS (NM_172041)	-promoter-TSS (NM_172041)	-364	NM_172041	Kcnk2
chr13	107233695	107233873	-0.103004	11	0.0066977	0.0150015	Intergenic	Intergenic	-9940	NM_012912	Atf3
chr13	107316880	107317145	0.125503	12	1.8176e-05	0.000224588	Intergenic	Intergenic	60288	NM_001002851	Nenf
chr13	108188842	108188983	0.102162	10	6.0195e-05	0.000499215	intron (NM_031742, intron 5 of 10)	-intron (NM_031742, intron 5 of 10)	59292	NM_031742	Kcnh1
chr13	109031337	109031530	-0.126293	15	3.0765e-05	0.000319213	exon (NM_001014132, exon 2 of 15)	-exon (NM_001014132, exon 2 of 15)	2831	NM_001014132	Traf3ip3
chr14	1552118	1552562	0.114839	10	1.6358e-08	1.09111e-06	exon (NM_199114, exon 5 of 6)	-exon (NM_199114, exon 5 of 6)	10613	NM_199114	Fgfrl1
chr14	1585083	1585649	-0.113146	10	0.0012911	0.00427767	exon (NM_022287, exon 3 of 3)	-exon (NM_022287, exon 3 of 3)	2180	NM_001172084	Idua
chr14	2431522	2431667	0.10427	10	6.7723e-06	0.000113387	intron (NM_001271410, intron 1 of 17)	-intron (NM_001271410, intron 1 of 17)	2167	NM_001271410	Evi5
chr14	2849262	2849792	-0.25098	11	2.3616e-06	5.26016e-05	Intergenic	Intergenic	-20015	NM_001109563	LOC689986
chr14	3028760	3029226	-0.218588	17	5.8547e-09	4.74383e-07	Intergenic	Intergenic	-21507	NM_001012031	Brdt
chr14	4321147	4321603	0.104067	10	0.0080818	0.0172918	Intergenic	Intergenic	433222	NM_022956	Barhl2
chr14	4479749	4479935	-0.14214	12	2.0421e-06	4.73486e-05	Intergenic	Intergenic	591689	NM_022956	Barhl2
chr14	4566059	4566953	0.101375	10	0.017091	0.0309482	Intergenic	Intergenic	553532	NM_001008338	Lrrc8d
chr14	5206304	5206596	0.150745	10	0.0011552	0.00392346	Intergenic	Intergenic	-86412	NM_001008338	Lrrc8d
chr14	5254258	5254363	-0.194363	10	1.5609e-05	0.000201885	Intergenic	Intergenic	-134273	NM_001008338	Lrrc8d
chr14	5374438	5375016	-0.117128	12	0.0055939	0.0130178	intron (NM_001037179, intron 1 of 3)	-intron (NM_001037179, intron 1 of 3)	19093	NM_001037179	Lrrc8c
chr14	5559765	5560190	0.181331	18	6.0244e-10	7.21248e-08	Intergenic	Intergenic	53590	NM_001037205	Abcg3l4
chr14	5951107	5951316	-0.328803	10	3.8639e-11	6.8402e-09	intron (NM_001107205, intron 1 of 15)	-intron (NM_001107205, intron 1 of 15)	270	NM_001107205	Abcg3l3
chr14	7326652	7326861	0.181293	10	8.6182e-05	0.000632361	intron (NM_001100789, intron 34 of 46)	-intron (NM_001100789, intron 34 of 46)	56062	NM_198049	Slc10a6
chr14	8600163	8600322	0.21767	10	8.7191e-07	2.52222e-05	Intergenic	Intergenic	-259622	NM_001170551	Wdfy3
chr14	9044309	9044485	-0.116979	10	0.0076263	0.0165571	exon (NM_001170551, exon 56 of 69)	-exon (NM_001170551, exon 56 of 69)	90994	NM_031242	Cds1
chr14	9076512	9077113	0.177788	10	3.4132e-05	0.000340527	intron (NM_031242, intron 12 of 12)	-intron (NM_031242, intron 12 of 12)	58578	NM_031242	Cds1
chr14	9100052	9100268	0.139627	10	0.00015688	0.000948824	intron (NM_031242, intron 4 of 12)	-intron (NM_031242, intron 4 of 12)	35231	NM_031242	Cds1
chr14	9998631	9999106	0.109046	10	0.0039672	0.0100357	exon (NM_001025670, exon 12 of 12)	-exon (NM_001025670, exon 12 of 12)	51285	NM_001025670	Agpat9
chr14	10183637	10183830	-0.183406	10	0.00015842	0.000957208	exon (NM_022605, exon 5 of 5)	-exon (NM_022605, exon 5 of 5)	-5831	NM_001044255	Coq2
chr14	11388729	11389089	0.237619	10	1.4125e-05	0.000188905	Intergenic	Intergenic	471235	NM_001082539	Hnrnpd
chr14	13796265	13796498	0.218258	10	2.8815e-06	6.10763e-05	Intergenic	Intergenic	-119061	NM_001012033	Paqr3
chr14	15618162	15618419	0.117687	10	2.2408e-06	5.06356e-05	Intergenic	Intergenic	201994	NM_001109329	RGD1561226
chr14	16495737	16496164	0.101977	15	0.0094771	0.0195936	intron (NM_001107208, intron 2 of 10)	-intron (NM_001107208, intron 2 of 10)	53149	NM_001107208	Sept11
chr14	16822490	16822718	0.195439	10	1.0847e-07	4.97139e-06	intron (NM_001100889, intron 2 of 10)	-intron (NM_001100889, intron 2 of 10)	132047	NM_001100889	Shroom3
chr14	21088215	21088706	0.118537	11	0.0077496	0.0167615	Intergenic	Intergenic	9152	NM_001012036	Utp3
chr14	23905256	23905321	-0.230134	10	0.00025933	0.00131488	Intergenic	Intergenic	133713	NM_001004098	Cenpc
chr14	25821595	25821668	0.112594	10	5.54e-05	0.000470935	intron (NM_001169137, intron 8 of 18)	-intron (NM_001169137, intron 8 of 18)	297462	NM_024367	Epha5
chr14	28803155	28803473	-0.138424	10	0.00097177	0.00344912	intron (NM_130822, intron 2 of 24)	-intron (NM_130822, intron 2 of 24)	51363	NM_130822	Adgrl3
chr14	33294247	33294443	-0.103627	10	0.012179	0.0237309	Intergenic	Intergenic	49162	NM_001008870	Spink2
chr14	33528315	33528661	0.122152	14	1.4366e-05	0.000191192	exon (NM_057198, exon 3 of 11)	-exon (NM_057198, exon 3 of 11)	-19099	NM_080910	Paics
chr14	33591823	33592223	-0.169548	14	0.00044297	0.00194273	Intergenic	Intergenic	-82634	NM_080910	Paics
chr14	33623221	33623807	0.12904	10	0.00099745	0.00351887	Intergenic	Intergenic	-114125	NM_080910	Paics
chr14	34398132	34398458	-0.182901	10	4.4477e-05	0.000406099	Intergenic	Intergenic	-64882	NM_001013990	Srd5a3
chr14	34830868	34831009	0.206947	10	5.4378e-06	9.77469e-05	Intergenic	Intergenic	153880	NM_022264	Kit
chr14	34839141	34839383	0.150968	10	7.7709e-06	0.000125115	Intergenic	Intergenic	145557	NM_022264	Kit
chr14	35012318	35012527	-0.149625	10	0.00030752	0.00147835	Intergenic	Intergenic	-27604	NM_022264	Kit
chr14	35893667	35894070	-0.14533	10	0.0012585	0.00418898	intron (NM_001108358, intron 1 of 10)	-intron (NM_001108358, intron 1 of 10)	5167	NM_001108358	Lnx1
chr14	37407854	37408139	-0.135053	10	4.8974e-06	9.04711e-05	Intergenic	Intergenic	-89304	NM_001013874	Ociad1
chr14	37452572	37452878	-0.105788	10	0.025856	0.0432725	Intergenic	Intergenic	-134032	NM_001013874	Ociad1
chr14	38229891	38230342	0.103466	10	0.0022748	0.00657311	intron (NM_182473, intron 5 of 20)	-intron (NM_182473, intron 5 of 20)	120185	NM_182473	Corin
chr14	42585518	42585605	-0.147402	10	0.0089377	0.0186863	Intergenic	Intergenic	142941	NM_001191935	Grxcr1
chr14	43544575	43544831	0.10855	10	0.0043189	0.0107078	Intergenic	Intergenic	-27757	NM_001034198	Tmem33
chr14	44020108	44020618	0.129663	10	0.015357	0.0284327	intron (NM_001191678, intron 1 of 26)	-intron (NM_001191678, intron 1 of 26)	29192	NM_001191678	Limch1
chr14	45707281	45707327	0.144589	10	0.00011657	0.0007745	intron (NM_053547, intron 6 of 24)	-intron (NM_053547, intron 6 of 24)	41587	NM_053547	Rfc1
chr14	49116252	49116461	-0.102449	10	0.025532	0.0428185	Intergenic	Intergenic	571782	NM_001271306	Wdr82
chr14	49206508	49206581	0.20699	10	7.5131e-10	8.52999e-08	Intergenic	Intergenic	661970	NM_001271306	Wdr82
chr14	67875443	67875899	-0.114	12	9.279e-05	0.0006617	intron (NM_022632, intron 4 of 36)	-intron (NM_022632, intron 4 of 36)	16169	NM_022632	Slit2
chr14	72183623	72183887	0.119278	10	0.008874	0.0185781	intron (NM_021751, intron 4 of 26)	-intron (NM_021751, intron 4 of 26)	51537	NM_001110137	Prom1
chr14	72959583	72959953	-0.114728	12	0.0019856	0.00594326	Intergenic	Intergenic	-314684	NM_001107221	C1qtnf7
chr14	78890234	78890289	0.111856	15	1.7068e-06	4.16966e-05	Intergenic	Intergenic	128154	NM_001106012	Evc2
chr14	80289815	80290069	0.133907	10	0.012012	0.0234459	intron (NM_001107225, intron 6 of 26)	-intron (NM_001107225, intron 6 of 26)	-145639	NM_001144850	Psapl1
chr14	80371835	80372064	0.128435	11	0.0018325	0.00558224	intron (NM_080900, intron 11 of 17)	-intron (NM_080900, intron 11 of 17)	76274	NM_080900	Afap1
chr14	80568917	80569189	0.114967	10	0.0019309	0.00581606	intron (NM_001177695, intron 6 of 19)	-intron (NM_001177695, intron 6 of 19)	55055	NM_001001514	Ablim2
chr14	80664141	80664462	-0.105484	10	0.010301	0.0208662	intron (NM_001107226, intron 8 of 16)	-intron (NM_001107226, intron 8 of 16)	9492	NM_001107226	Sh3tc1
chr14	80880227	80880612	-0.135811	12	3.1091e-05	0.000320901	exon (NM_031766, exon 11 of 11)	-exon (NM_031766, exon 11 of 11)	23049	NM_031766	Cpz
chr14	80936506	80936675	-0.204941	10	0.00019254	0.00108443	Intergenic	Intergenic	62575	NM_001108363	Hmx1
chr14	80960395	80960575	0.115748	10	0.00018521	0.00105588	Intergenic	Intergenic	38681	NM_001108363	Hmx1
chr14	81316330	81316469	0.177506	10	3.4498e-05	0.000343262	exon (NM_001130062, exon 6 of 9)	-exon (NM_001130062, exon 6 of 9)	23458	NM_001130062	Dok7
chr14	81405751	81406103	-0.15246	10	0.00088275	0.00322131	intron (NM_019339, intron 2 of 15)	-intron (NM_019339, intron 2 of 15)	30267	NM_019339	Rgs12
chr14	82723458	82723731	0.123974	10	0.0053855	0.0126447	Intergenic	Intergenic	-26366	NM_053429	Fgfr3
chr14	82833905	82834337	-0.155105	11	0.00014204	0.000892367	Intergenic	Intergenic	47335	NM_001107228	Fam53a
chr14	83477578	83478070	-0.100741	10	0.0029668	0.00804143	Intergenic	Intergenic	-20046	NM_013052	Ywhah
chr14	83746345	83746571	-0.150783	10	0.00075323	0.00284714	intron (NM_001191682, intron 26 of 32)	-intron (NM_001191682, intron 26 of 32)	53829	NM_001191682	Sfi1
chr14	83746630	83746851	-0.153001	14	1.6566e-06	4.08982e-05	exon (NM_001191682, exon 26 of 33)	-exon (NM_001191682, exon 26 of 33)	53546	NM_001191682	Sfi1
chr14	83998086	83998239	0.129221	10	0.0065867	0.0147883	intron (NM_024135, intron 2 of 15)	-intron (NM_024135, intron 2 of 15)	39055	NM_024135	Limk2
chr14	84015770	84016104	0.113674	10	0.013594	0.0259255	intron (NM_024135, intron 2 of 15)	-intron (NM_024135, intron 2 of 15)	21281	NM_024135	Limk2
chr14	84134954	84135198	-0.131932	13	7.085e-05	0.000553884	exon (NM_133562, exon 2 of 13)	-exon (NM_133562, exon 2 of 13)	1831	NM_133562	Inpp5j
chr14	84255888	84255999	0.15791	10	0.00011774	0.000779915	Intergenic	Intergenic	35039	NR_130147	Tug1
chr14	84520255	84520612	-0.180824	10	0.0054262	0.012707	Intergenic	Intergenic	-8707	NM_001107232	Osbp2
chr14	84778564	84779040	0.173711	10	1.9456e-05	0.000233378	Intergenic	Intergenic	-7270	NM_001107235	Sf3a1
chr14	84859899	84860121	0.128054	10	0.002467	0.00699111	TTS (NM_001006961)	-TTS (NM_001006961)	2778	NM_001006961	Osm
chr14	84945035	84945487	-0.184949	10	0.0012585	0.00418898	Intergenic	Intergenic	57405	NM_022196	Lif
chr14	86083002	86083377	0.160584	10	0.0047708	0.0115634	Intergenic	Intergenic	-68701	NM_001004210	Xbp1
chr14	86236228	86236623	0.131874	11	0.011088	0.0220597	Intergenic	Intergenic	-65509	NM_001017502	Ccdc117
chr14	87419508	87419794	-0.172376	10	0.00013398	0.000853583	intron (NM_020100, intron 1 of 2)	-intron (NM_020100, intron 1 of 2)	2361	NM_020100	Ramp3
chr14	89379223	89379523	-0.109312	10	0.00064732	0.0025447	Intergenic	Intergenic	163357	NM_001109092	Hus1
chr14	89532391	89533046	0.136112	10	1.6156e-06	4.02317e-05	intron (NM_001109092, intron 7 of 8)	-intron (NM_001109092, intron 7 of 8)	10011	NM_001109092	Hus1
chr14	89591515	89591910	-0.142236	10	0.0001275	0.00082254	intron (NM_001135915, intron 1 of 6)	-intron (NM_001135915, intron 1 of 6)	3949	NM_001135915	LOC688553
chr14	92911472	92911810	0.130744	16	0.00025073	0.00128488	promoter-TSS (NM_001109093)	-promoter-TSS (NM_001109093)	-199	NM_001109093	Grb10
chr14	95467576	95467637	0.104587	13	3.8684e-06	7.56922e-05	Intergenic	Intergenic	1862082	NM_001135020	Sec61g
chr14	102732635	102732817	0.102591	10	0.014649	0.0273743	intron (NM_001305130, intron 21 of 22)	-intron (NM_001305130, intron 21 of 22)	-7978	NM_013109	Otx1
chr14	102765056	102765342	-0.154195	14	2.1719e-06	4.95281e-05	intron (NM_001305130, intron 19 of 22)	-intron (NM_001305130, intron 19 of 22)	-40451	NM_013109	Otx1
chr14	103600178	103600392	-0.214183	10	6.2118e-07	1.94492e-05	intron (NM_001115022, intron 2 of 2)	-intron (NM_001115022, intron 2 of 2)	-57595	NM_001017504	Zrsr1
chr14	104467162	104467255	-0.110449	10	0.0060709	0.0138619	intron (NM_001100971, intron 21 of 21)	-intron (NM_001100971, intron 21 of 21)	-20656	NM_001109582	LOC690352
chr14	105080973	105081380	0.14875	10	0.0046629	0.0113638	intron (NM_001191683, intron 2 of 3)	-intron (NM_001191683, intron 2 of 3)	78433	NM_001191683	Bcl11a
chr14	105250889	105250920	-0.13856	10	0.00059703	0.00241247	Intergenic	Intergenic	248161	NM_001191683	Bcl11a
chr14	107294270	107294704	0.148853	14	1.3876e-06	3.56717e-05	exon (NM_001108366, exon 8 of 10)	-exon (NM_001108366, exon 8 of 10)	83039	NM_001191684	Fancl
chr14	111228712	111229065	-0.174177	13	0.0025549	0.00716842	exon (NM_001013130, exon 27 of 37)	-exon (NM_001013130, exon 27 of 37)	152148	NM_001013130	Sptbn1
chr14	111241784	111242099	-0.106412	10	0.0013587	0.00445267	intron (NM_001013130, intron 33 of 36)	-intron (NM_001013130, intron 33 of 36)	165201	NM_001013130	Sptbn1
chr15	3275	3389	-0.154119	10	1.8585e-08	1.19897e-06	Intergenic	Intergenic	-318957	NM_031828	Kcnma1
chr15	2355296	2355429	0.142498	12	2.431e-05	0.000270287	exon (NM_001107250, exon 2 of 2)	-exon (NM_001107250, exon 2 of 2)	2452	NM_001107250	Zfp503
chr15	2355633	2355873	0.132552	19	3.0622e-07	1.11793e-05	exon (NM_001107250, exon 2 of 2)	-exon (NM_001107250, exon 2 of 2)	2842	NM_001107250	Zfp503
chr15	2511694	2511775	-0.229966	10	4.6067e-08	2.52679e-06	promoter-TSS (NM_001107249)	-promoter-TSS (NM_001107249)	-469	NM_001107249	Comtd1
chr15	2932394	2932627	0.144388	10	0.00019821	0.00110355	Intergenic	Intergenic	283809	NM_001108368	Dupd1
chr15	3160604	3160891	0.28904	10	6.2737e-05	0.000511774	intron (NM_012895, intron 7 of 10)	-intron (NM_012895, intron 7 of 10)	298143	NM_012895	Adk
chr15	3772552	3772983	-0.140349	11	0.00047728	0.00204143	intron (NM_133605, intron 13 of 19)	-intron (NM_133605, intron 13 of 19)	-15471	NM_001105740	Ndst2
chr15	4125461	4125733	0.138021	10	4.8406e-06	8.96435e-05	Intergenic	Intergenic	-21663	NM_001109518	Mrps16
chr15	5712859	5713343	-0.136142	12	0.00065321	0.00256027	intron (NM_134459, intron 6 of 12)	-intron (NM_001009969_2, intron 3 of 4)	39437	NM_134459	Cd99l2
chr15	5976928	5977137	-0.212605	10	1.1317e-06	3.03245e-05	intron (NM_001011698_1, intron 2 of 3)	-intron (NM_001011698_1, intron 2 of 3)	-34142	NM_001009976	Spetex-2A
chr15	8550199	8550536	0.203296	10	3.6527e-06	7.24133e-05	Intergenic	Intergenic	-4495	NM_001108371	Ube2e2
chr15	9309265	9309724	0.109154	10	0.0019792	0.00592855	intron (NM_012672, intron 5 of 10)	-intron (NM_012672, intron 5 of 10)	227305	NM_139114	Rpl15
chr15	10636399	10636531	-0.270811	10	5.258e-13	1.62316e-10	Intergenic	Intergenic	114099	NM_001014136	Ngly1
chr15	11408643	11409078	0.199056	10	0.00010547	0.000722071	Intergenic	Intergenic	647251	NM_001100508	Oxsm
chr15	14313220	14313284	-0.289731	10	1.9567e-11	3.8067e-09	intron (NM_013219, intron 26 of 28)	-intron (NM_013219, intron 26 of 28)	-37544	NM_001107251	Fezf2
chr15	14314074	14314517	-0.142448	12	4.5825e-07	1.54486e-05	intron (NM_013219, intron 26 of 28)	-intron (NM_013219, intron 26 of 28)	-36500	NM_001107251	Fezf2
chr15	14516248	14516410	-0.126009	10	0.0084392	0.0178509	intron (NM_134356, intron 13 of 31)	-intron (NM_134356, intron 13 of 31)	-104213	NM_001106026	RGD1306063
chr15	14785939	14786140	0.197477	10	0.00060788	0.00244336	intron (NM_134356, intron 3 of 31)	-intron (NM_134356, intron 3 of 31)	344720	NM_134356	Ptprg
chr15	18379007	18379192	0.146147	12	0.0071297	0.0158117	intron (NM_001014137, intron 11 of 13)	-intron (NM_001014137, intron 11 of 13)	-141314	NM_001106027	Fam3d
chr15	21091550	21091763	-0.1553	10	0.00018701	0.00106145	Intergenic	Intergenic	-7343	NM_001134541	Gpr137c
chr15	21184519	21184683	0.153271	10	0.00025933	0.00131488	intron (NM_138528, intron 7 of 16)	-intron (NM_138528, intron 7 of 16)	20935	NM_138528	Ero1a
chr15	21454225	21454593	-0.16697	10	2.4002e-07	9.27142e-06	Intergenic	Intergenic	-27145	NM_001011915	Fermt2
chr15	21562609	21564026	-0.150018	16	2.2081e-06	5.02003e-05	intron (NM_001033066, intron 1 of 11)	-intron (NM_001033066, intron 1 of 11)	5978	NM_001033066	Ddhd1
chr15	22911025	22911283	-0.103495	12	0.00013175	0.00084297	exon (NM_001107254, exon 4 of 12)	-exon (NM_001107254, exon 4 of 12)	63453	NM_001107254	Samd4a
chr15	23871407	23871737	0.105388	14	1.1114e-05	0.00016097	Intergenic	Intergenic	-328549	NM_001107258	Atg14
chr15	24147510	24148081	-0.252376	10	3.9737e-10	5.10067e-08	Intergenic	Intergenic	-79938	NM_001107259	Peli2
chr15	24162127	24162262	-0.354409	10	4.5075e-14	2.58907e-11	Intergenic	Intergenic	-65539	NM_001107259	Peli2
chr15	24243954	24244178	0.13552	10	0.00050717	0.00213337	intron (NM_001107259, intron 1 of 6)	-intron (NM_001107259, intron 1 of 6)	16332	NM_001107259	Peli2
chr15	24311902	24312242	-0.265433	10	5.1098e-11	8.67574e-09	intron (NM_001107259, intron 2 of 6)	-intron (NM_001107259, intron 2 of 6)	84338	NM_001107259	Peli2
chr15	24504733	24504870	0.100187	14	5.9836e-05	0.000497674	Intergenic	Intergenic	66119	NM_001170475	Tmem260
chr15	27051422	27051853	0.144672	10	0.00027716	0.00137615	exon (NM_001000503, exon 1 of 1)	-exon (NM_001000503, exon 1 of 1)	603	NM_001000503	Olr1637
chr15	27437091	27437231	0.1391	11	0.0010101	0.00355614	exon (NM_001007681, exon 2 of 4)	-exon (NM_001007681, exon 2 of 4)	612	NM_001007681	Zfp219
chr15	27898229	27898741	0.111001	10	0.01105	0.0219993	Intergenic	Intergenic	-10597	NM_001000832	Olr1642
chr15	29102153	29102584	0.104044	10	0.0044196	0.0108924	Intergenic	Intergenic	-1132628	NM_001000102	Olr1645
chr15	32430638	32430837	-0.107236	10	0.0039062	0.00991629	exon (NM_001168583, exon 10 of 10)	-exon (NM_001168583, exon 10 of 10)	7389	NM_001168583	Oxa1l
chr15	33038279	33038781	-0.228016	10	1.0654e-08	7.71238e-07	promoter-TSS (NM_001106034)	-promoter-TSS (NM_001106034)	-482	NM_001106034	Cmtm5
chr15	33943255	33943535	-0.140949	10	0.002548	0.00715228	intron (NM_019285, intron 4 of 25)	-intron (NM_019285, intron 4 of 25)	2957	NM_019285	Adcy4
chr15	34062894	34063549	0.147325	10	0.00057068	0.00232663	Intergenic	Intergenic	-17873	NM_001108378	Sdr39u1
chr15	36053509	36053642	0.128005	13	2.3987e-05	0.000267698	exon (NM_024376, exon 2 of 2)	-exon (NM_024376, exon 2 of 2)	24425	NM_024376	Gja3
chr15	36552186	36552444	0.116142	10	5.5428e-07	1.76806e-05	intron (NM_001107266, intron 24 of 25)	-intron (NM_001107266, intron 24 of 25)	49922	NM_001134990	N6amt2
chr15	36582876	36582970	0.159144	10	0.016422	0.0299546	Intergenic	Intergenic	19314	NM_001134990	N6amt2
chr15	37312000	37312859	-0.151924	27	5.6387e-12	1.26121e-09	Intergenic	Intergenic	197362	NM_012952	Fgf9
chr15	39124161	39124429	0.114077	13	0.0065308	0.0146946	Intergenic	Intergenic	225780	NM_139091	Nupl1
chr15	39777501	39778005	-0.104924	10	0.0062541	0.0141745	intron (NM_001191686, intron 1 of 12)	-intron (NM_001191686, intron 1 of 12)	55284	NM_001191686	Spata13
chr15	39778506	39778737	0.243667	10	1.6963e-06	4.15313e-05	exon (NM_001191686, exon 2 of 13)	-exon (NM_001191686, exon 2 of 13)	56153	NM_001191686	Spata13
chr15	39778781	39778911	-0.144778	10	7.2459e-05	0.000560945	exon (NM_001191686, exon 2 of 13)	-exon (NM_001191686, exon 2 of 13)	56377	NM_001191686	Spata13
chr15	39778920	39779978	0.150116	12	0.00011671	0.000775017	exon (NM_001191686, exon 2 of 13)	-exon (NM_001191686, exon 2 of 13)	56980	NM_001191686	Spata13
chr15	39904738	39904839	0.144687	15	1.1633e-07	5.27339e-06	intron (NM_031052, intron 7 of 18)	-intron (NM_031052, intron 7 of 18)	33476	NM_031052	Mipep
chr15	40720262	40720341	-0.119968	13	0.00014553	0.00090645	Intergenic	Intergenic	-16335	NM_001009635	Spryd7
chr15	42615012	42615347	0.151346	13	5.0212e-06	9.23471e-05	Intergenic	Intergenic	67613	NM_001025751	Blk
chr15	43721342	43722048	-0.161249	13	3.7103e-09	3.24466e-07	intron (NM_053307, intron 1 of 4)	-intron (NM_053307, intron 1 of 4)	34588	NM_053307	Msra
chr15	44409078	44409466	-0.145013	11	0.004873	0.0117615	intron (NM_020097, intron 2 of 4)	-intron (NM_020097, intron 2 of 4)	15312	NM_020097	Extl3
chr15	44794221	44794658	-0.187555	10	0.00093032	0.00335201	Intergenic	Intergenic	-11860	NM_001107271	Zfp395
chr15	49577585	49578189	-0.100386	12	0.00016012	0.000964049	TTS (NM_031123)	-TTS (NM_031123)	11002	NM_031123	Stc1
chr15	50336483	50336662	-0.12006	12	0.019225	0.0341162	Intergenic	Intergenic	-140880	NM_017086	Egr3
chr15	50732345	50732382	-0.124994	10	0.0064901	0.0146127	intron (NM_001107275, intron 1 of 9)	-intron (NM_001107275, intron 1 of 9)	17280	NM_001107275	Slc39a14
chr15	56203449	56203585	0.192275	10	4.9915e-05	0.00044015	exon (NM_001170471, exon 12 of 19)	-exon (NM_001170471, exon 12 of 19)	48379	NM_001170471	Zc3h13
chr15	57501323	57501898	0.217506	15	3.4456e-09	3.07168e-07	exon (NM_001109912, exon 3 of 3)	-exon (NM_001109912, exon 3 of 3)	2037	NM_013043	Tsc22d1
chr15	58956744	58957094	0.299181	10	1.9979e-07	7.99867e-06	Intergenic	Intergenic	-19066	NM_001106050	Dnajc15
chr15	64773691	64773872	0.165146	13	2.1902e-07	8.6298e-06	Intergenic	Intergenic	-611031	NM_017326	Calm2
chr15	86044277	86044602	0.18119	10	0.003237	0.00861256	Intergenic	Intergenic	333465	NM_001001515	Lmo7
chr15	87328189	87328778	-0.120973	13	0.010274	0.0208662	intron (NM_001106055, intron 3 of 84)	-intron (NM_001106055, intron 3 of 84)	36696	NM_001106055	Mycbp2
chr15	89261271	89261783	-0.138677	12	7.6103e-06	0.000122953	Intergenic	Intergenic	-16735	NM_001277160	Rbm26
chr15	89396521	89396616	-0.15866	10	7.2106e-09	5.57635e-07	Intergenic	Intergenic	80179	NM_001108390	Ndfip2
chr15	101069794	101069929	0.143695	10	8.7091e-06	0.000136342	intron (NM_001107285, intron 7 of 7)	-intron (NM_001107285, intron 7 of 7)	1152588	NM_001107285	Gpc5
chr15	102831638	102831802	-0.118567	13	3.2316e-05	0.000329992	Intergenic	Intergenic	95756	NM_001107286	Tgds
chr15	102950021	102950465	0.168607	10	0.00024963	0.00127977	intron (NM_001006994, intron 6 of 8)	-intron (NM_001006994, intron 6 of 8)	18530	NM_001006994	Gpr180
chr15	103558851	103559133	0.153068	11	0.0006584	0.00257736	intron (NM_133411_1, intron 3 of 19)	-intron (NM_133411_1, intron 3 of 19)	52246	NM_133411_1	Abcc4
chr15	103559185	103559375	-0.193626	10	9.5365e-05	0.000673633	intron (NM_133411_1, intron 3 of 19)	-intron (NM_133411_1, intron 3 of 19)	51958	NM_133411_1	Abcc4
chr15	103863452	103863554	0.155632	10	0.00029894	0.00144773	Intergenic	Intergenic	-18131	NM_022232	Dnajc3
chr15	106336785	106337156	-0.200737	10	2.8758e-05	0.000305256	Intergenic	Intergenic	-29837	NM_001127494	Stk24
chr15	106439716	106440097	0.117693	15	0.00085879	0.00315546	Intergenic	Intergenic	112629	NM_001079838	Slc15a1
chr15	107095883	107096017	0.113346	10	0.0076263	0.0165571	intron (NM_001034937, intron 7 of 8)	-intron (NM_001034937, intron 7 of 8)	-28063	NM_001109386	Gpr183
chr16	2300945	2301217	-0.219498	14	6.4111e-12	1.40867e-09	intron (NM_001191937, intron 1 of 12)	-intron (NM_001191937, intron 1 of 12)	9243	NM_001191937	Il17rd
chr16	2929086	2929288	-0.191044	10	3.4867e-05	0.000346011	Intergenic	Intergenic	-3594	NM_170787	Erc2
chr16	3177342	3177696	0.175095	10	0.00040688	0.0018184	exon (NM_170787, exon 4 of 17)	-exon (NM_170787, exon 4 of 17)	244738	NM_170787	Erc2
chr16	3899227	3899486	-0.212968	10	3.0819e-08	1.80436e-06	Intergenic	Intergenic	117332	NM_022631	Wnt5a
chr16	4878758	4879092	0.108658	11	0.0032123	0.00856025	intron (NM_175595, intron 2 of 36)	-intron (NM_175595, intron 2 of 36)	180649	NM_175595	Cacna2d3
chr16	5895695	5895826	-0.21113	10	7.4097e-07	2.21243e-05	Intergenic	Intergenic	-12998	NM_022592	Tkt
chr16	6075795	6076155	-0.101802	10	0.025532	0.0428185	intron (NM_001135866, intron 6 of 12)	-intron (NM_001135866, intron 6 of 12)	17051	NM_001135866	Rft1
chr16	6311934	6312623	-0.137889	10	0.00047142	0.00202193	intron (NM_181368, intron 1 of 2)	-intron (NM_181368, intron 1 of 2)	301	NM_181368	Mustn1
chr16	6566137	6566575	-0.184602	17	1.7498e-09	1.72911e-07	intron (NM_001009271, intron 10 of 13)	-intron (NM_001009271, intron 10 of 13)	6737	NM_001009271	Nt5dc2
chr16	6596013	6596335	0.162153	10	0.0031363	0.00839726	Intergenic	Intergenic	36555	NM_001009271	Nt5dc2
chr16	6655450	6655753	-0.221529	10	5.2682e-07	1.7067e-05	intron (NM_001100882, intron 7 of 15)	-intron (NM_001100882, intron 7 of 15)	4236	NM_001100882	Sema3g
chr16	6870889	6871704	0.134087	16	1.6967e-06	4.15313e-05	intron (NM_054011, intron 2 of 9)	-intron (NM_054011, intron 2 of 9)	17625	NM_054011	Sh3bp5
chr16	6951068	6951164	-0.158481	10	0.00083744	0.00308947	exon (NM_001107293, exon 6 of 6)	-exon (NM_001107293, exon 6 of 6)	-11554	NM_001007623	Mettl6
chr16	7480586	7481766	0.13064	17	0.00034255	0.00160041	Intergenic	Intergenic	-65192	NM_001107295	Oxnad1
chr16	7532188	7532475	0.260941	11	1.3955e-06	3.58255e-05	Intergenic	Intergenic	-14036	NM_001107295	Oxnad1
chr16	7676953	7677085	-0.216162	10	1.0206e-05	0.000151972	intron (NM_019352, intron 4 of 6)	-intron (NM_019352, intron 4 of 6)	12214	NM_019352	Timm23
chr16	7837055	7837392	-0.123055	10	0.00053562	0.0022198	promoter-TSS (NM_001106062)	-promoter-TSS (NM_001106062)	26	NM_001106062	Ogdhl
chr16	7848080	7848436	-0.155492	12	0.00028571	0.00140073	intron (NM_001106062, intron 7 of 21)	-intron (NM_001106062, intron 7 of 21)	11060	NM_001106062	Ogdhl
chr16	7857793	7857932	0.100242	10	0.00041831	0.00185726	exon (NM_001106062, exon 20 of 22)	-exon (NM_001106062, exon 20 of 22)	20665	NM_001106062	Ogdhl
chr16	8168586	8169109	-0.103502	12	0.011685	0.0229335	Intergenic	Intergenic	57999	NM_145767	Drgx
chr16	8600653	8600775	0.109901	13	1.6827e-06	4.13512e-05	Intergenic	Intergenic	71031	NM_001013999	Lrrc18
chr16	8909851	8910137	-0.160694	10	0.0033671	0.0088397	exon (NM_001107297, exon 5 of 6)	-exon (NM_001107297, exon 5 of 6)	46457	NM_001107297	Arhgap22
chr16	10801147	10802020	-0.151907	11	0.0019685	0.00590588	intron (NM_024378, intron 4 of 12)	-intron (NM_024378, intron 4 of 12)	248099	NR_031790	Mir346
chr16	16514334	16514393	-0.154773	10	5.4646e-09	4.47843e-07	Intergenic	Intergenic	811427	NM_001170349	Sh2d4b
chr16	17359497	17359552	0.119075	10	4.0685e-08	2.26822e-06	intron (NM_001169127, intron 2 of 8)	-intron (NM_001169127, intron 2 of 8)	-33734	NM_001170349	Sh2d4b
chr16	18336041	18336339	0.139675	22	1.5264e-06	3.85501e-05	Intergenic	Intergenic	70857	NM_153731	Zfp709
chr16	18566542	18566695	0.102684	10	0.00027195	0.00135913	Intergenic	Intergenic	8556	NM_001006964	Babam1
chr16	18632891	18633112	0.282542	10	7.8601e-06	0.000126388	exon (NM_001107301, exon 2 of 5)	-exon (NM_001107301, exon 2 of 5)	1873	NM_001107301	Abhd8
chr16	18717714	18718217	-0.116122	10	0.00016315	0.000977408	Intergenic	Intergenic	-8979	NM_199375	Mvb12a
chr16	18784085	18784216	0.110864	10	0.00088275	0.00322131	intron (NM_053580, intron 8 of 12)	-intron (NM_053580, intron 8 of 12)	-7090	NM_001106066	Pgls
chr16	18904928	18905123	0.194365	15	0.00029999	0.00145206	exon (NM_001106069, exon 28 of 28)	-exon (NM_001106069, exon 28 of 28)	-3118	NM_001106068	B3gnt3
chr16	18905248	18905343	0.112687	10	0.00075993	0.00286521	exon (NM_001106069, exon 27 of 28)	-exon (NM_001106069, exon 27 of 28)	-3388	NM_001106068	B3gnt3
chr16	18905816	18905986	0.117671	13	9.8506e-05	0.000689819	exon (NM_001106069, exon 25 of 28)	-exon (NM_001106069, exon 25 of 28)	-3993	NM_001106068	B3gnt3
chr16	19110518	19110734	-0.174708	10	0.00036739	0.00168962	intron (NM_001107303, intron 5 of 7)	-intron (NM_001107303, intron 5 of 7)	2282	NM_001107303	Arrdc2
chr16	19159502	19159785	0.135172	10	0.0031612	0.00844879	intron (NM_001134796, intron 7 of 25)	-intron (NM_001134796, intron 7 of 25)	4398	NM_001134796	Mast3
chr16	19166954	19167737	0.231704	10	1.9744e-12	5.08619e-10	intron (NM_001134796, intron 25 of 25)	-intron (NM_001134796, intron 25 of 25)	-3755	NM_022185	Pik3r2
chr16	19172999	19173714	0.122394	10	0.0086853	0.0182567	intron (NM_022185, intron 2 of 15)	-intron (NM_022185, intron 2 of 15)	2256	NM_022185	Pik3r2
chr16	19313257	19313353	0.188124	10	0.017434	0.0314352	exon (NM_019216, exon 2 of 2)	-exon (NM_019216, exon 2 of 2)	2423	NM_019216	Gdf15
chr16	19344764	19344953	-0.138618	21	1.0108e-10	1.60666e-08	TTS (NM_001013880)	-TTS (NM_001013880)	3282	NM_001013880	Isyna1
chr16	19346809	19347067	0.342946	10	2.6819e-10	3.78026e-08	intron (NM_001013880, intron 5 of 10)	-intron (NM_001013880, intron 5 of 10)	1203	NM_001013880	Isyna1
chr16	19405017	19405442	-0.108846	10	6.5335e-07	2.01358e-05	intron (NM_001037180, intron 3 of 7)	-intron (NM_001037180, intron 3 of 7)	1958	NM_001037180	Fkbp8
chr16	19429543	19429753	0.147842	16	9.9289e-05	0.000693107	exon (NM_001107305, exon 3 of 4)	-exon (NM_001107305, exon 3 of 4)	844	NM_001107305	RGD1566239
chr16	19480095	19480283	-0.12211	10	0.018623	0.033212	exon (NM_001106075, exon 3 of 3)	-exon (NM_001106075, exon 3 of 3)	-14391	NM_001047115	Crtc1
chr16	19484614	19485030	0.161604	10	0.0001003	0.000697414	Intergenic	Intergenic	-9758	NM_001047115	Crtc1
chr16	19789125	19789838	0.136223	10	0.0031115	0.00834222	intron (NM_031653, intron 1 of 14)	-intron (NM_031653, intron 1 of 14)	4307	NM_031653	Ncan
chr16	19827756	19827974	-0.120328	10	0.00070781	0.00272004	exon (NM_001127654, exon 10 of 10)	-exon (NM_001127654, exon 10 of 10)	-3359	NM_001108398	Hapln4
chr16	19834613	19834783	0.252402	13	4.6629e-14	2.58907e-11	promoter-TSS (NM_001127654)	-promoter-TSS (NM_001127654)	-5	NM_001127654	Tm6sf2
chr16	20299944	20300073	-0.11612	10	3.8774e-05	0.000370795	Intergenic	Intergenic	48396	NM_001009538	Zfp868
chr16	22188058	22188228	0.130537	10	0.0038161	0.00973852	Intergenic	Intergenic	-54994	NM_153470	Lzts1
chr16	27217889	27218558	0.213782	10	8.8087e-06	0.000137211	Intergenic	Intergenic	469632	NM_013128	Cpe
chr16	27316962	27318181	0.119556	10	0.0027391	0.00756086	Intergenic	Intergenic	568980	NM_013128	Cpe
chr16	27419295	27420433	-0.109448	12	0.0057556	0.0133104	Intergenic	Intergenic	671272	NM_013128	Cpe
chr16	27439631	27440311	0.126113	10	0.0028967	0.00789199	Intergenic	Intergenic	691379	NM_013128	Cpe
chr16	27496005	27497343	-0.116687	12	0.0147	0.0274627	Intergenic	Intergenic	748082	NM_013128	Cpe
chr16	27586867	27587556	0.146414	13	0.00020364	0.00112533	Intergenic	Intergenic	838620	NM_013128	Cpe
chr16	27636644	27637258	-0.110845	12	0.0082779	0.0176125	Intergenic	Intergenic	-796155	NM_001106081	Tll1
chr16	27641080	27641810	-0.141032	10	0.0015164	0.00482882	Intergenic	Intergenic	-791661	NM_001106081	Tll1
chr16	27855253	27855580	0.159026	12	1.3456e-06	3.47724e-05	Intergenic	Intergenic	-577689	NM_001106081	Tll1
chr16	27950498	27951247	0.106148	10	0.0063948	0.014439	Intergenic	Intergenic	-482233	NM_001106081	Tll1
chr16	30553959	30554389	-0.111058	11	0.0050692	0.0121105	Intergenic	Intergenic	-158968	NM_001109110	Anxa10
chr16	31896642	31896708	0.118759	10	0.010595	0.021338	Intergenic	Intergenic	60880	NM_182672	Cbr4
chr16	32657657	32657926	-0.101142	10	0.00031042	0.00148808	Intergenic	Intergenic	108686	NM_001012049	Mfap3l
chr16	37772408	37772704	0.186233	10	6.7004e-07	2.05484e-05	intron (NM_053724_1, intron 1 of 4)	-intron (NM_053724_1, intron 1 of 4)	31364	NM_053724_1	Glra3
chr16	41758648	41759113	0.183555	11	2.5399e-06	5.56113e-05	Intergenic	Intergenic	-363487	NM_001031641	Aga
chr16	45837743	45837960	-0.171829	12	0.00042244	0.00187226	Intergenic	Intergenic	-810919	NM_001169133	Tenm3
chr16	46928995	46929128	0.18428	10	0.0079657	0.0170972	intron (NM_001169133, intron 2 of 29)	-intron (NM_001169133, intron 2 of 29)	280291	NM_001169133	Tenm3
chr16	49766058	49766223	0.102038	10	2.6383e-05	0.000286062	intron (NM_053770, intron 11 of 21)	-intron (NM_053770, intron 11 of 21)	-97339	NM_053650	Pdlim3
chr16	50411096	50411595	-0.140853	13	9.1967e-06	0.000141368	Intergenic	Intergenic	47239	NM_053676	Mtnr1a
chr16	50488531	50488732	-0.159394	10	5.0128e-06	9.2329e-05	exon (NM_031819, exon 17 of 27)	-exon (NM_031819, exon 17 of 27)	-30047	NM_053676	Mtnr1a
chr16	54777855	54777971	0.223814	10	3.445e-08	1.97667e-06	intron (NM_022619, intron 1 of 11)	-intron (NM_001134686, intron 1 of 11)	27493	NM_001134686	Slc7a2
chr16	59176943	59177399	0.180557	10	9.0663e-05	0.00065522	Intergenic	Intergenic	-135759	NM_001127446	Dlc1
chr16	59338734	59338955	0.130962	10	8.7949e-05	0.000639883	intron (NM_001127446, intron 4 of 13)	-intron (NM_001127446, intron 4 of 13)	25915	NM_001127446	Dlc1
chr16	61159721	61160227	0.11808	11	0.0010254	0.00359506	Intergenic	Intergenic	-39993	NM_022199	Dusp4
chr16	62617703	62617983	0.100233	10	0.0056339	0.0130921	Intergenic	Intergenic	-82205	NM_001191554	Purg
chr16	62681229	62681512	-0.103005	12	0.023066	0.0393382	Intergenic	Intergenic	-145733	NM_001191554	Purg
chr16	69122216	69122786	0.103163	10	4.3094e-05	0.000397946	intron (NM_053857, intron 1 of 2)	-intron (NM_053857, intron 1 of 2)	1394	NM_053857	Eif4ebp1
chr16	69714515	69714570	-0.131677	10	0.027187	0.045134	Intergenic	Intergenic	-305406	NM_001109425	Zfp703
chr16	71159479	71159621	0.123515	12	0.00022653	0.00121122	Intergenic	Intergenic	-82207	NM_001004107	Tacc1
chr16	71299881	71300128	0.109663	17	0.0007516	0.00284558	exon (NM_001004107, exon 13 of 13)	-exon (NM_001004107, exon 13 of 13)	58248	NM_001004107	Tacc1
chr16	73064460	73064813	-0.184746	10	7.7047e-05	0.000585463	intron (NM_001276712, intron 1 of 3)	-intron (NM_001276712, intron 1 of 3)	2398	NM_001276712	Sfrp1
chr16	73496150	73496952	0.109655	10	0.0079082	0.0170021	Intergenic	Intergenic	-58712	NM_001107322	Ank1
chr16	73954690	73954990	0.256261	10	0.01378	0.0262053	intron (NM_017223, intron 7 of 8)	-intron (NM_017223, intron 7 of 8)	31890	NM_031355	Vdac3
chr16	74273240	74273478	-0.199668	10	1.0771e-06	2.91332e-05	Intergenic	Intergenic	-3327	NM_001106091	Mrps31
chr16	74297372	74297842	-0.192737	10	7.2459e-05	0.000560945	exon (NM_001047880, exon 5 of 8)	-exon (NM_001047880, exon 5 of 8)	16780	NM_001047880	Slc25a15
chr16	74425501	74425727	0.158861	10	2.3934e-05	0.000267187	exon (NM_001108878, exon 5 of 5)	-exon (NM_001108878, exon 5 of 5)	-21439	NM_001108877	Tpte2
chr16	74629567	74629851	0.240623	10	3.7164e-05	0.000360794	intron (NM_012511, intron 1 of 20)	-intron (NM_012511, intron 1 of 20)	21721	NM_012511	Atp7b
chr16	75978360	75978433	0.162148	14	0.00013745	0.000871084	Intergenic	Intergenic	86640	NM_134454	Angpt2
chr16	79410846	79411142	0.13113	16	3.6599e-05	0.000357407	Intergenic	Intergenic	-8305	NM_001169141	Myom2
chr16	79472027	79472512	-0.173459	10	6.5335e-07	2.01358e-05	Intergenic	Intergenic	-39407	NM_001107326	Kbtbd11
chr16	79489411	79489884	0.146701	13	1.5618e-05	0.000201931	Intergenic	Intergenic	-56785	NM_001107326	Kbtbd11
chr16	79636822	79637221	-0.125775	10	0.0058052	0.013396	intron (NM_053901, intron 10 of 15)	-intron (NM_053901, intron 10 of 15)	-57386	NM_001007686	Cln8
chr16	79787265	79787553	-0.16939	11	9.4555e-05	0.000669219	intron (NM_053901, intron 4 of 15)	-intron (NM_053901, intron 4 of 15)	-207773	NM_001007686	Cln8
chr16	80770479	80770773	-0.180814	10	0.0086232	0.0181497	intron (NM_031574, intron 2 of 23)	-intron (NM_031574, intron 2 of 23)	-59708	NM_001037182	LOC290876
chr16	80927367	80927505	0.462333	10	8.28e-13	2.39754e-10	intron (NM_057100, intron 12 of 14)	-intron (NM_057100, intron 12 of 14)	12091	NM_001106094	Tmem255b
chr16	80988497	80988715	-0.11833	10	3.8385e-09	3.32667e-07	intron (NM_031096, intron 1 of 6)	-intron (NM_031096, intron 1 of 6)	3190	NM_031096	Grk1
chr16	81458346	81458657	0.182456	14	1.6707e-08	1.10648e-06	intron (NM_053951, intron 1 of 30)	-intron (NM_053951, intron 1 of 30)	11264	NM_053951	Mcf2l
chr16	81458794	81459107	0.137834	10	8.5311e-05	0.000627535	intron (NM_053951, intron 1 of 30)	-intron (NM_053951, intron 1 of 30)	10815	NM_053951	Mcf2l
chr16	81555727	81555800	0.150574	10	3.3231e-06	6.78682e-05	intron (NM_001107324, intron 10 of 28)	-intron (NM_001107324, intron 10 of 28)	69097	NM_001107324	Atp11a
chr16	81967200	81967365	-0.113097	10	0.00064732	0.0025447	Intergenic	Intergenic	258242	NM_001107323	Tubgcp3
chr16	82094052	82094405	-0.11203	10	2.439e-10	3.504e-08	Intergenic	Intergenic	385188	NM_001107323	Tubgcp3
chr16	82096180	82096481	0.129093	10	0.013969	0.0264959	Intergenic	Intergenic	387290	NM_001107323	Tubgcp3
chr16	82529497	82529732	-0.144248	10	0.008874	0.0185781	intron (NM_001113522, intron 17 of 19)	-intron (NM_001113522, intron 17 of 19)	-15296	NM_001017508	Tex29
chr16	82832005	82832460	-0.168221	17	1.2046e-12	3.28434e-10	intron (NM_001177684, intron 8 of 13)	-intron (NM_001177684, intron 8 of 13)	24438	NM_001108402	Carkd
chr16	82910441	82910573	0.154264	10	3.4842e-06	6.99706e-05	Intergenic	Intergenic	39505	NM_001109535	Rab20
chr16	82999493	82999782	-0.267017	10	1.0859e-09	1.17912e-07	Intergenic	Intergenic	-45545	NM_001135009	Col4a1
chr16	83092900	83093265	0.296286	10	2.2329e-08	1.3786e-06	intron (NM_001135009, intron 2 of 51)	-intron (NM_001135009, intron 2 of 51)	47900	NM_001135009	Col4a1
chr16	83544295	83544774	0.226379	10	7.4233e-06	0.000121031	Intergenic	Intergenic	-135178	NM_001047978	LOC689713
chr16	83702662	83703193	-0.21045	10	4.6875e-05	0.000419684	intron (NM_001047978, intron 8 of 10)	-intron (NM_001047978, intron 8 of 10)	23215	NM_001047978	LOC689713
chr16	84902642	84902859	-0.129208	10	1.5959e-05	0.000205204	Intergenic	Intergenic	20871	NM_001106095	Lig4
chr16	84974779	84974942	-0.208522	12	1.2587e-07	5.64326e-06	Intergenic	Intergenic	92981	NM_001106095	Lig4
chr17	385870	386096	0.103794	10	0.00084484	0.00311216	Intergenic	Intergenic	-269800	NM_001107330	Irx4
chr17	1040558	1040777	-0.126032	10	0.0018993	0.0057366	Intergenic	Intergenic	-291716	NM_001039505	Irx2
chr17	4281644	4281756	-0.114111	10	0.0061619	0.0140089	Intergenic	Intergenic	-261790	NM_031007	Adcy2
chr17	4324551	4324648	-0.114475	10	0.00021004	0.0011492	Intergenic	Intergenic	-218890	NM_031007	Adcy2
chr17	6180135	6180218	0.276703	10	4.6457e-10	5.80371e-08	Intergenic	Intergenic	47782	NM_001025752	Cdk20
chr17	6408753	6409195	-0.128501	10	0.020943	0.0364786	intron (NM_001108404, intron 4 of 14)	-intron (NM_001108404, intron 4 of 14)	37770	NM_001108404	Cdc14b
chr17	7001877	7002568	-0.110792	10	0.0019956	0.00596095	Intergenic	Intergenic	-86011	NM_053566	Ptch1
chr17	7144481	7144635	-0.142774	10	0.0010149	0.00356762	Intergenic	Intergenic	56324	NM_053566	Ptch1
chr17	9950383	9950628	0.154786	10	0.0012585	0.00418898	Intergenic	Intergenic	-171049	NM_001107335	Dapk1
chr17	10199729	10199893	0.129074	10	5.4827e-05	0.000470794	Intergenic	Intergenic	-420354	NM_001107335	Dapk1
chr17	11128736	11128879	-0.224356	10	1.1284e-08	8.01314e-07	intron (NM_001106100, intron 21 of 26)	-intron (NM_001106100, intron 21 of 26)	88469	NM_001106100	Agtpbp1
chr17	11175674	11175900	0.147221	12	0.0001531	0.000931999	Intergenic	Intergenic	135448	NM_001106100	Agtpbp1
chr17	11386734	11387047	-0.105629	10	0.0058926	0.0135467	Intergenic	Intergenic	346552	NM_001106100	Agtpbp1
chr17	11963340	11963625	0.283706	10	0.013227	0.025368	Intergenic	Intergenic	-28692	NM_080908	Slc28a3
chr17	12437104	12437212	-0.11261	10	0.0030626	0.00824723	Intergenic	Intergenic	-3327	NM_001037362	Idnk
chr17	13913051	13913261	0.102495	10	0.00010441	0.00071784	intron (NM_053802, intron 9 of 17)	-intron (NM_053802, intron 9 of 17)	21954	NM_053802	Tgfbi
chr17	13976857	13977193	-0.248005	10	5.0969e-05	0.000446179	Intergenic	Intergenic	-18009	NM_001108405	Lect2
chr17	14178258	14178428	-0.169243	10	1.668e-05	0.000211274	Intergenic	Intergenic	-48486	NM_001113788	RGD1562024
chr17	14178568	14178702	0.208074	10	1.8621e-05	0.000228424	Intergenic	Intergenic	-48778	NM_001113788	RGD1562024
chr17	14537441	14537598	-0.158644	10	0.00045445	0.00196334	Intergenic	Intergenic	80213	NM_017182	H2afy
chr17	14824705	14824929	0.124293	12	0.0032052	0.0085456	Intergenic	Intergenic	-9327	NM_053624	Pitx1
chr17	14839680	14839778	-0.109608	10	0.0010598	0.00368626	exon (NM_053624, exon 3 of 3)	-exon (NM_053624, exon 3 of 3)	5585	NM_053624	Pitx1
chr17	15230018	15230393	0.175356	10	0.00064732	0.0025447	intron (NM_001112712, intron 8 of 15)	-intron (NM_001112713, intron 8 of 15)	6411	NM_001112712	Grk6
chr17	15511848	15512072	0.152686	13	2.0404e-07	8.11662e-06	TTS (NM_001109904)	-TTS (NM_001109904)	15388	NM_001109904	Fgfr4
chr17	15660448	15660833	0.11354	13	0.013112	0.0252018	exon (NM_022179, exon 10 of 19)	-exon (NM_022179, exon 10 of 19)	8688	NM_022179	Hk3
chr17	15931186	15932070	-0.105683	10	0.0013358	0.00439304	Intergenic	Intergenic	24130	NM_080777	Sncb
chr17	16361495	16361989	0.114565	11	0.0091715	0.0190727	Intergenic	Intergenic	-38804	NM_053878	Cplx2
chr17	19906835	19907168	-0.190323	16	8.208e-07	2.41984e-05	Intergenic	Intergenic	20147	NM_001170429	Nxnl2
chr17	21433193	21433403	0.195615	10	6.1052e-06	0.0001057	Intergenic	Intergenic	-13826	NM_012867	Ninj1
chr17	25010739	25010914	-0.119283	10	0.00011892	0.000785781	intron (NM_012726, intron 6 of 7)	-intron (NM_012726, intron 6 of 7)	174558	NM_057188	Gmpr
chr17	26998686	26998793	0.406746	11	4.5852e-14	2.58907e-11	Intergenic	Intergenic	33718	NM_001305178	Mcur1
chr17	27025092	27025246	0.25259	10	1.5959e-05	0.000205204	Intergenic	Intergenic	60147	NM_001305178	Mcur1
chr17	27977754	27978053	0.100586	11	0.024067	0.0407791	Intergenic	Intergenic	-93777	NM_214457	Phactr1
chr17	28487049	28487425	0.153052	10	5.8353e-05	0.000489506	intron (NM_001105751, intron 3 of 11)	-intron (NM_001105751, intron 3 of 11)	89369	NM_001105751	Hivep1
chr17	28951623	28952009	0.12059	10	0.00023572	0.00124503	Intergenic	Intergenic	-82311	NM_001177820	LOC100362172
chr17	29526008	29526237	0.121057	11	0.0025035	0.00706111	intron (NM_001109118, intron 6 of 8)	-intron (NM_001109118, intron 6 of 8)	33774	NM_001109118	Elovl2
chr17	29807770	29808103	0.112466	10	0.00093848	0.0033736	exon (NM_001001511_1, exon 1 of 3)	-exon (NM_001001511_1, exon 1 of 3)	1067	NM_001001511_1	Gcnt2
chr17	30515126	30515317	0.145011	10	3.7782e-07	1.32018e-05	Intergenic	Intergenic	497642	NM_001107345	Tfap2a
chr17	30538877	30539187	-0.164671	10	0.0017193	0.00530796	Intergenic	Intergenic	521452	NM_001107345	Tfap2a
chr17	33142738	33142876	0.209159	10	2.214e-06	5.02733e-05	exon (NM_001107348, exon 11 of 13)	-exon (NM_001107348, exon 11 of 13)	80832	NM_001008891	Ssr1
chr17	33503539	33503773	0.114601	10	0.0021136	0.00623071	Intergenic	Intergenic	75940	NR_110686	LOC100909970
chr17	37085863	37086046	-0.166555	10	0.0012802	0.00424947	Intergenic	Intergenic	-1967	NM_001013886	Tubb2b
chr17	38585456	38585824	-0.231624	12	2.7033e-10	3.78454e-08	intron (NM_001039606, intron 4 of 10)	-intron (NM_001039606, intron 4 of 10)	123907	NM_001039606	Gmds
chr17	39024752	39024891	-0.155007	10	0.0010598	0.00368626	Intergenic	Intergenic	5349	NM_134338	Foxc1
chr17	39036252	39036321	0.106365	10	0.0092625	0.0192255	Intergenic	Intergenic	-6116	NM_134338	Foxc1
chr17	39225602	39226133	0.14248	12	0.0015122	0.00482161	Intergenic	Intergenic	109161	NM_022858	Foxq1
chr17	40987746	40987982	-0.138687	13	1.5044e-05	0.000197102	Intergenic	Intergenic	-91482	NM_001137626	E2f3
chr17	46914869	46915285	0.14391	14	9.4839e-07	2.68574e-05	intron (NM_001106110, intron 8 of 9)	-intron (NM_001106110, intron 8 of 9)	55115	NM_001106109	Nrsn1
chr17	49018987	49019190	-0.199286	10	4.4636e-07	1.50886e-05	Intergenic	Intergenic	41040	NM_001135084	Zfp322a
chr17	49602482	49603311	0.152035	10	0.00083744	0.00308947	Intergenic	Intergenic	-510602	NM_022686	Hist1h4b
chr17	49623038	49623327	0.222372	10	1.292e-05	0.000177623	Intergenic	Intergenic	-490316	NM_022686	Hist1h4b
chr17	59921107	59921483	0.102972	12	0.0065925	0.0147969	Intergenic	Intergenic	123788	NM_001107357	Arhgap12
chr17	60682913	60683823	-0.132124	10	7.3388e-06	0.000119915	intron (NM_001107358, intron 1 of 4)	-intron (NM_001107358, intron 1 of 4)	13435	NM_001107358	Zfp438
chr17	64161791	64161924	0.141758	11	0.0013702	0.00447655	intron (NM_001100575, intron 1 of 15)	-intron (NM_001100575, intron 1 of 15)	42926	NM_001100575	Mpp7
chr17	77701062	77701458	0.11223	10	0.00038487	0.00174806	Intergenic	Intergenic	76500	NM_001108420	Asb13
chr17	77921959	77922076	-0.109276	19	5.3769e-09	4.44344e-07	Intergenic	Intergenic	21849	NM_001033698	Ankrd16
chr17	78870430	78870597	-0.113887	10	0.0024274	0.00691351	Intergenic	Intergenic	-239452	NM_001276721	Prkcq
chr17	79476401	79476592	-0.153175	10	0.004881	0.011774	Intergenic	Intergenic	-97731	NM_001107364	Sfmbt2
chr17	82708286	82708948	-0.111465	16	1.1826e-11	2.41386e-09	exon (NM_001083586, exon 1 of 13)	-exon (NM_017197, exon 1 of 13)	263	NM_017197	Celf2
chr17	83134264	83134833	0.101196	10	0.004844	0.011698	exon (NM_001106120, exon 15 of 15)	-exon (NM_001106120, exon 15 of 15)	121934	NM_001106120	Usp6nl
chr17	83219190	83219551	-0.167447	13	4.5738e-09	3.87404e-07	intron (NM_001106120, intron 2 of 14)	-intron (NM_001106120, intron 2 of 14)	37112	NM_001106120	Usp6nl
chr17	83229416	83229692	-0.177309	11	0.00020961	0.0011492	intron (NM_001106120, intron 2 of 14)	-intron (NM_001106120, intron 2 of 14)	26929	NM_001106120	Usp6nl
chr17	83654224	83654285	0.292154	10	4.5408e-14	2.58907e-11	intron (NM_001107365, intron 2 of 9)	-intron (NM_001107365, intron 2 of 9)	4535	NM_001107365	Camk1d
chr17	84057930	84058520	-0.265112	10	4.0364e-10	5.16341e-08	exon (NM_001107365, exon 10 of 10)	-exon (NM_001107365, exon 10 of 10)	-248743	NM_145081	Optn
chr17	84790319	84790463	0.127066	10	0.0024078	0.00687288	exon (NM_001191821, exon 21 of 23)	-exon (NM_001191821, exon 21 of 23)	49112	NM_138523	Prpf18
chr17	84790601	84790776	-0.101995	12	0.0047338	0.0114951	exon (NM_001191821, exon 21 of 23)	-exon (NM_001191821, exon 21 of 23)	49410	NM_138523	Prpf18
chr17	86229478	86229677	-0.151444	10	2.667e-05	0.000288254	Intergenic	Intergenic	-149335	NM_207590	Nmt2
chr17	87017149	87017891	0.170072	14	0.0014164	0.00459577	Intergenic	Intergenic	-195239	NM_022224	Pter
chr17	92019511	92019774	0.114857	10	0.022338	0.0383487	Intergenic	Intergenic	-226823	NM_001012162	Mllt10
chr17	92118784	92119042	-0.107915	11	0.00069509	0.0026836	Intergenic	Intergenic	-127553	NM_001012162	Mllt10
chr17	93100939	93101435	-0.13425	10	0.0045572	0.0111608	intron (NM_053926, intron 1 of 5)	-intron (NM_053926, intron 1 of 5)	10757	NM_053926	Pip4k2a
chr17	94993012	94993353	0.125729	12	0.00036427	0.00167755	Intergenic	Intergenic	-52095	NM_001191693	Arhgap21
chr17	95265500	95265552	0.236001	10	1.1542e-09	1.23887e-07	Intergenic	Intergenic	-57603	NM_001170326	Gpr158
chr17	96952169	96952290	0.277697	15	7.1602e-12	1.56406e-09	Intergenic	Intergenic	193596	NM_053682	Yme1l1
chr18	155363	155573	0.102598	10	2.5542e-05	0.000279295	intron (NM_183331, intron 18 of 24)	-intron (NM_183331, intron 18 of 24)	34334	NM_183331	F8
chr18	2156869	2156920	0.251748	11	4.0967e-14	2.58907e-11	intron (NM_001107405, intron 7 of 21)	-intron (NM_001107405, intron 7 of 21)	-32302	NR_037376	Mir3582
chr18	3472827	3473029	-0.12791	10	0.00021004	0.0011492	intron (NM_001107404, intron 2 of 8)	-intron (NM_001107404, intron 2 of 8)	47038	NM_001107404	Cables1
chr18	3801177	3801355	-0.129511	13	0.00018582	0.00105823	intron (NM_001190372, intron 6 of 9)	-intron (NM_001190372, intron 6 of 9)	-23464	NM_153624	Npc1
chr18	4553499	4553640	0.119382	14	6.6118e-05	0.000528166	Intergenic	Intergenic	277899	NM_131909	Hrh4
chr18	4917306	4917432	-0.116586	20	4.8739e-14	2.58907e-11	Intergenic	Intergenic	231116	NM_001107403	Zfp521
chr18	11865208	11865344	0.252902	11	2.0087e-09	1.95903e-07	promoter-TSS (NM_001107402)	-promoter-TSS (NM_001107402)	-169	NM_001107402	Dsc3
chr18	12570188	12570926	-0.105878	10	0.0042858	0.0106434	Intergenic	Intergenic	81804	NM_001106160	Trappc8
chr18	14611493	14611524	0.205981	10	0.013687	0.0260616	intron (NM_001107401, intron 2 of 9)	-intron (NM_001107401, intron 2 of 9)	107333	NM_001107401	Nol4
chr18	16400409	16400437	0.185	10	0.0042203	0.010515	intron (NM_001034145, intron 17 of 21)	-intron (NM_001034145, intron 17 of 21)	-20080	NM_001108425	Mocos
chr18	22710142	22710482	0.10658	10	0.01378	0.0262053	Intergenic	Intergenic	215115	NM_022958	Pik3c3
chr18	23137739	23138441	0.108537	10	0.00072052	0.00275613	Intergenic	Intergenic	544837	NM_001013060	Rit2
chr18	23920549	23920801	-0.109893	10	1.2491e-06	3.27882e-05	Intergenic	Intergenic	97220	NM_001100515	Slc25a46
chr18	23920803	23920840	-0.16999	10	6.3248e-09	5.04808e-07	Intergenic	Intergenic	97073	NM_001100515	Slc25a46
chr18	24872581	24872838	-0.14601	15	4.6004e-07	1.54704e-05	exon (NM_053959, exon 19 of 19)	-exon (NM_053959, exon 19 of 19)	59303	NM_053959	Bin1
chr18	25851540	25851744	-0.15725	14	4.6766e-06	8.75764e-05	intron (NM_178096, intron 1 of 2)	-intron (NM_178096, intron 1 of 2)	16577	NM_178096	Nrep
chr18	26271793	26271982	-0.156181	10	6.0821e-05	0.000501955	exon (NM_001107397, exon 16 of 18)	-exon (NM_001107397, exon 16 of 18)	79052	NM_001107397	Epb41l4a
chr18	26349266	26349561	-0.163048	10	1.336e-05	0.0001816	intron (NM_001107397, intron 1 of 17)	-intron (NM_001107397, intron 1 of 17)	1526	NM_001107397	Epb41l4a
chr18	27011913	27012034	0.254081	10	2.2645e-08	1.39351e-06	exon (NM_001106155, exon 6 of 6)	-exon (NM_001106155, exon 6 of 6)	4818	NM_001106155	Wnt8a
chr18	27465908	27466077	-0.104644	13	3.0199e-06	6.30267e-05	Intergenic	Intergenic	-28907	NM_001100658	Hspa9
chr18	28349570	28349789	-0.18845	10	0.0032885	0.00871915	Intergenic	Intergenic	7488	NM_001109122	Tmem173
chr18	29358157	29358465	-0.204105	10	1.1682e-05	0.000165852	Intergenic	Intergenic	17879	NM_021744	Cd14
chr18	29704688	29704945	-0.110416	10	0.018259	0.0326752	exon (NM_199507, exon 1 of 4)	-exon (NM_199507, exon 1 of 4)	786	NM_199507	Pcdha7
chr18	30171316	30171437	0.129825	10	9.5367e-06	0.000144766	exon (NM_001014779, exon 1 of 1)	-exon (NM_001014779, exon 1 of 1)	1609	NM_001014779	Pcdhb8
chr18	30252090	30252313	0.100698	10	0.00035727	0.00165264	Intergenic	Intergenic	8307	NM_173099	Pcdhb12
chr18	30576009	30576482	0.136908	10	4.7845e-06	8.90461e-05	exon (NM_001037139, exon 1 of 3)	-exon (NM_001037139, exon 1 of 3)	1140	NM_001037139	Pcdhga2
chr18	30601585	30601739	0.123617	10	0.00045029	0.00196125	exon (NM_001037137, exon 1 of 4)	-exon (NM_001037137, exon 1 of 4)	804	NM_001037137	Pcdhga5
chr18	31197503	31197871	-0.18172	10	9.9291e-05	0.000693107	exon (NM_053944, exon 4 of 4)	-exon (NM_053944, exon 4 of 4)	15182	NM_053944	Pcdh12
chr18	31343181	31343280	0.174813	10	0.00017132	0.00100824	Intergenic	Intergenic	-8307	NM_001013059	Ndfip1
chr18	31648802	31649444	-0.149909	10	6.1052e-06	0.0001057	Intergenic	Intergenic	-101537	NM_001106150	Spry4
chr18	31880133	31880300	0.310169	10	3.3051e-13	1.07353e-10	Intergenic	Intergenic	-54536	NM_001107389	Arhgap26
chr18	36318518	36319078	-0.121098	10	0.021216	0.0368682	promoter-TSS (NM_022209)	-promoter-TSS (NM_022209)	-434	NM_022209	Ppp2r2b
chr18	38730951	38731470	0.113288	10	0.020674	0.036079	Intergenic	Intergenic	-154978	NM_001170534	Mcc
chr18	38734237	38734535	0.163243	10	0.000498	0.00210833	Intergenic	Intergenic	-158153	NM_001170534	Mcc
chr18	40763182	40763279	-0.164464	10	0.0027391	0.00756086	Intergenic	Intergenic	-22783	NM_001106932	Fem1c
chr18	40791670	40792302	-0.102483	15	0.008203	0.017474	intron (NM_001108890, intron 1 of 2)	-intron (NM_001108890, intron 1 of 2)	1798	NM_001108890	Ticam2
chr18	44298235	44298357	-0.126007	10	0.004844	0.011698	Intergenic	Intergenic	420190	NM_001108431	Dtwd2
chr18	47999856	48000094	0.111476	10	1.514e-07	6.43372e-06	exon (NM_001107380, exon 4 of 4)	-exon (NM_001107380, exon 4 of 4)	-7216	NM_001109125	RGD1564428
chr18	49142056	49142191	0.171863	16	1.2514e-09	1.31672e-07	Intergenic	Intergenic	112898	NM_001191697	Cep120
chr18	49142288	49142461	0.159263	15	1.1265e-08	8.01314e-07	Intergenic	Intergenic	112647	NM_001191697	Cep120
chr18	49142818	49143025	-0.122678	21	9.4239e-10	1.03838e-07	Intergenic	Intergenic	112100	NM_001191697	Cep120
chr18	49143430	49143511	0.106687	10	0.00065902	0.00257736	Intergenic	Intergenic	111551	NM_001191697	Cep120
chr18	49143564	49143655	-0.184772	10	7.8937e-14	3.27615e-11	Intergenic	Intergenic	111412	NM_001191697	Cep120
chr18	52756614	52757581	0.134995	10	0.0027172	0.00751708	Intergenic	Intergenic	-23524	NM_001131003	LOC100174910
chr18	53041854	53042131	0.125791	10	0.00057586	0.00234468	exon (NM_001100657, exon 19 of 24)	-exon (NM_001100657, exon 19 of 24)	-69778	NM_001033887	Prrc1
chr18	56701856	56701911	0.207264	10	7.4097e-07	2.21243e-05	Intergenic	Intergenic	-24053	NM_024361	Ndst1
chr18	57690978	57691557	0.136167	12	0.0011828	0.00399865	TTS (NM_001109513)	-TTS (NM_001109513)	-6194	NM_001134542	Pcyox1l
chr18	58175693	58176026	-0.112496	10	0.00014078	0.000886622	exon (NM_012492, exon 1 of 1)	-exon (NM_012492, exon 1 of 1)	1140	NM_012492	Adrb2
chr18	61191046	61191302	0.221308	10	0.00016475	0.000984625	intron (NM_001008300, intron 1 of 30)	-intron (NM_001008300, intron 1 of 30)	56932	NM_001008300	Nedd4l
chr18	61918124	61918285	-0.148448	10	0.0083787	0.0177561	exon (NM_001107382, exon 3 of 10)	-exon (NM_001107382, exon 3 of 10)	49224	NM_001107382	Zfp532
chr18	61930938	61931153	0.10011	10	0.00031931	0.00151842	intron (NM_001107382, intron 3 of 9)	-intron (NM_001107382, intron 3 of 9)	-54644	NM_001106139	Oacyl
chr18	61974808	61975022	0.156854	10	3.4498e-05	0.000343262	exon (NM_001107382, exon 10 of 10)	-exon (NM_001107382, exon 10 of 10)	-10775	NM_001106139	Oacyl
chr18	65011027	65011197	0.124275	17	0.00078854	0.00294809	Intergenic	Intergenic	-56470	NM_001271365	Ldlrad4
chr18	65820517	65820775	0.219581	10	8.4448e-05	0.000623766	Intergenic	Intergenic	-315217	NM_053369	Tcf4
chr18	65907583	65907844	0.115197	10	0.00074658	0.00282858	Intergenic	Intergenic	-228149	NM_053369	Tcf4
chr18	67223459	67223707	-0.150736	10	5.9054e-07	1.86462e-05	intron (NM_001106137, intron 4 of 9)	-intron (NM_001106137, intron 4 of 9)	6997	NM_001106137	Poli
chr18	67288607	67289022	-0.103087	10	1.8216e-05	0.000224784	intron (NM_001115025, intron 2 of 7)	-intron (NM_001115025, intron 2 of 7)	7375	NM_001115025	Mbd2
chr18	67566043	67566237	0.132521	19	4.7194e-07	1.57537e-05	Intergenic	Intergenic	284700	NM_001115025	Mbd2
chr18	70754264	70754614	0.176261	10	3.1002e-05	0.000320692	intron (NM_019319, intron 1 of 4)	-intron (NM_019319, intron 1 of 4)	682	NM_019319	Mapk4
chr18	72068537	72068708	-0.150501	15	1.8119e-13	6.26666e-11	intron (NM_001106133, intron 13 of 17)	-intron (NM_001106133, intron 13 of 17)	179570	NM_001106133	Dym
chr18	72091480	72091752	-0.269944	10	3.169e-08	1.83807e-06	intron (NM_001106133, intron 13 of 17)	-intron (NM_001106133, intron 13 of 17)	202563	NM_001106133	Dym
chr18	72359140	72359672	0.176778	11	1.8399e-10	2.7712e-08	Intergenic	Intergenic	64603	NM_030858	Smad7
chr18	73332412	73332842	0.145689	10	0.00083011	0.00306758	Intergenic	Intergenic	152208	NM_019191	Smad2
chr18	74224605	74224717	0.139395	10	2.1097e-06	4.85543e-05	exon (NM_213628, exon 7 of 7)	-exon (NM_213628, exon 7 of 7)	-21123	NM_001106132	Loxhd1
chr18	76977286	76977601	0.198991	10	4.8974e-06	9.04711e-05	intron (NM_001100973, intron 2 of 2)	-intron (NM_001100973, intron 2 of 2)	35159	NM_001100973	Pard6g
chr18	76991088	76991873	-0.132069	22	0.0018508	0.0056277	intron (NM_001100973, intron 2 of 2)	-intron (NM_001100973, intron 2 of 2)	49196	NM_001100973	Pard6g
chr18	77000207	77000363	0.300318	10	1.1514e-10	1.81469e-08	intron (NM_001100973, intron 2 of 2)	-intron (NM_001100973, intron 2 of 2)	41285	NM_001127373	Adnp2
chr18	77086074	77086318	-0.101562	10	0.0032885	0.00871915	exon (NM_001107373, exon 6 of 6)	-exon (NM_001107373, exon 6 of 6)	8673	NM_001107373	Rbfa
chr18	77440182	77440603	-0.106524	10	0.0011552	0.00392346	Intergenic	Intergenic	-74498	NM_001106131	Ctdp1
chr18	77531984	77532289	-0.128284	12	0.0021401	0.00629393	exon (NM_001244933, exon 5 of 6)	-exon (NM_001244933, exon 5 of 6)	61718	NM_001244933	Nfatc1
chr18	77532317	77532966	0.181464	14	7.4679e-06	0.000121507	intron (NM_001244933, intron 4 of 5)	-intron (NM_001244933, intron 4 of 5)	61213	NM_001244933	Nfatc1
chr18	77543989	77544212	-0.1586	10	0.0013133	0.00433234	intron (NM_001244933, intron 4 of 5)	-intron (NM_001244933, intron 4 of 5)	49754	NM_001244933	Nfatc1
chr18	77551834	77552078	0.109841	11	5.9839e-06	0.000104252	intron (NM_001244933, intron 2 of 5)	-intron (NM_001244933, intron 2 of 5)	41899	NM_001244933	Nfatc1
chr18	78148425	78148691	-0.131416	12	0.0021535	0.00632487	Intergenic	Intergenic	-289905	NM_001108892	Sall3
chr18	78939791	78940133	0.162983	10	0.00060788	0.00244336	Intergenic	Intergenic	-3646	NM_001025289	Mbp
chr18	78948299	78948537	0.12236	10	0.0066846	0.0149757	intron (NM_001025289, intron 1 of 3)	-intron (NM_001025289, intron 1 of 3)	4810	NM_001025289	Mbp
chr18	79025211	79025565	-0.108037	16	5.0071e-14	2.58907e-11	promoter-TSS (NM_001025291)	-promoter-TSS (NM_001025293)	-201	NM_001025291	Mbp
chr18	79899276	79899823	0.136567	10	0.0017775	0.00545383	Intergenic	Intergenic	453944	NM_001191695	Zfp516
chr18	80537495	80537727	-0.112121	10	8.2166e-09	6.21285e-07	Intergenic	Intergenic	-76346	NM_001106129	Zadh2
chr18	81295278	81295486	-0.116461	18	7.288e-06	0.000119451	Intergenic	Intergenic	-62433	NM_001010920	Cndp2
chr19	2750107	2750210	0.209506	10	1.608e-12	4.29026e-10	Intergenic	Intergenic	524950	NM_053392	Cdh11
chr19	10128801	10129077	-0.167259	14	1.541e-13	5.53471e-11	exon (NM_001106168, exon 4 of 10)	-exon (NM_001106168, exon 4 of 10)	14914	NM_001106168	Mmp15
chr19	10245153	10245677	-0.167355	10	1.4124e-06	3.61848e-05	intron (NM_031809, intron 27 of 33)	-intron (NM_031809, intron 27 of 33)	58999	NM_031809	Cngb1
chr19	10292722	10292907	-0.110195	10	0.00083744	0.00308947	Intergenic	Intergenic	-42974	NM_001103352	Kifc3
chr19	10543856	10544018	-0.163196	10	1.4598e-08	9.93222e-07	exon (NM_001108437, exon 2 of 8)	-exon (NM_001108437, exon 2 of 8)	3701	NM_001108437	Ccdc102a
chr19	11284263	11284707	-0.125869	12	0.014474	0.0272247	TTS (NM_053968)	-TTS (NM_053968)	1917	NM_053968	Mt3
chr19	13843247	13843354	0.110598	15	1.1737e-12	3.22362e-10	Intergenic	Intergenic	-6618	NM_001107412	Hmgxb4
chr19	14103627	14103950	-0.10653	10	0.016532	0.0301101	exon (NM_133568, exon 3 of 3)	-exon (NM_133568, exon 3 of 3)	10519	NM_133568	Rasd2
chr19	14264537	14265049	0.179179	10	0.00015688	0.000948824	intron (NM_001008508, intron 1 of 6)	-intron (NM_001008508, intron 1 of 6)	6218	NM_001008508	Tpst2
chr19	14271679	14272053	0.109088	10	0.012012	0.0234459	intron (NM_001008508, intron 1 of 6)	-intron (NM_001008508, intron 1 of 6)	13291	NM_001008508	Tpst2
chr19	14440859	14441507	-0.192507	10	6.471e-05	0.000521379	intron (NM_001134538, intron 8 of 16)	-intron (NM_001134538, intron 8 of 16)	-67847	NM_001009716	Asphd2
chr19	14484400	14484944	0.183692	12	3.1628e-06	6.51987e-05	intron (NM_001134538, intron 1 of 16)	-intron (NM_001134538, intron 1 of 16)	70114	NM_001134538	Sez6l
chr19	15816014	15816143	0.192886	12	5.7256e-07	1.81706e-05	Intergenic	Intergenic	-65665	NM_001030044	Irx5
chr19	16645860	16646122	0.120646	10	0.010745	0.0215714	intron (NM_001039713, intron 8 of 8)	-intron (NM_001039713, intron 8 of 8)	212809	NM_001039713	Fto
chr19	17311329	17311416	0.184395	12	4.1855e-14	2.58907e-11	Intergenic	Intergenic	-218776	NM_031094	Rbl2
chr19	17944732	17945083	0.158284	11	0.0048091	0.0116328	promoter-TSS (NM_001106171)	-promoter-TSS (NM_001106171)	-642	NM_001106171	Tox3
chr19	19166672	19166761	0.101667	10	0.005305	0.0125163	Intergenic	Intergenic	-112166	NM_001107415	Sall1
chr19	19899390	19899525	-0.120601	13	0.00028125	0.00139146	Intergenic	Intergenic	-66357	NM_001271381	Nkd1
chr19	20086430	20086930	0.306661	12	4.89e-12	1.1416e-09	Intergenic	Intergenic	-12819	NM_053396	Adcy7
chr19	20274440	20274697	0.160191	10	0.00051181	0.00214684	Intergenic	Intergenic	-15006	NM_001106173	Cnep1r1
chr19	20484231	20484544	-0.116645	11	0.010756	0.0215924	intron (NM_053583, intron 1 of 6)	-intron (NM_053583, intron 1 of 6)	8523	NM_053583	Zfp423
chr19	20657139	20657387	0.127265	11	0.011992	0.0234399	intron (NM_053583, intron 4 of 6)	-intron (NM_053583, intron 4 of 6)	181398	NM_053583	Zfp423
chr19	21696172	21696340	0.117981	12	0.0019486	0.00585473	Intergenic	Intergenic	-20885	NM_080905	Siah1
chr19	22929904	22930637	-0.145185	10	2.3934e-05	0.000267187	Intergenic	Intergenic	-14718	NM_001012057	Gpt2
chr19	24839227	24839542	0.206392	10	1.1682e-05	0.000165852	exon (NM_017169, exon 5 of 6)	-exon (NM_017169, exon 5 of 6)	1992	NM_017169	Prdx2
chr19	25032119	25032398	0.12978	10	0.0024078	0.00687288	intron (NM_030866, intron 1 of 9)	-intron (NM_030866, intron 1 of 9)	13907	NM_030866	Nfix
chr19	25033706	25033779	-0.196975	10	4.2955e-07	1.45863e-05	intron (NM_030866, intron 1 of 9)	-intron (NM_030866, intron 1 of 9)	15391	NM_030866	Nfix
chr19	25046890	25047201	0.109585	10	0.00014789	0.000916413	intron (NM_030866, intron 2 of 9)	-intron (NM_030866, intron 2 of 9)	28694	NM_030866	Nfix
chr19	25404224	25404431	0.148641	10	0.00027716	0.00137615	intron (NM_012918, intron 1 of 47)	-intron (NM_012918, intron 1 of 47)	20167	NM_012918	Cacna1a
chr19	26495671	26495835	0.208107	10	4.9396e-05	0.000436191	promoter-TSS (NM_001025666)	-promoter-TSS (NM_001025666)	29	NM_001025666	Mgat4d
chr19	26766673	26766933	-0.115515	10	0.0061163	0.0139332	intron (NM_001191093, intron 6 of 6)	-intron (NM_001191093, intron 6 of 6)	-94328	NM_001134539	Tbc1d9
chr19	27358675	27358703	0.122283	10	0.0071415	0.0158237	Intergenic	Intergenic	-128579	NM_013129	Il15
chr19	28593061	28593580	0.108994	18	1.3481e-06	3.48e-05	Intergenic	Intergenic	-113344	NM_053917	Inpp4b
chr19	29361803	29362336	-0.120912	10	0.017784	0.0319476	Intergenic	Intergenic	-144289	NM_001191699	Frem3
chr19	31646280	31646796	-0.121493	10	0.010157	0.0207104	intron (NM_001013890, intron 4 of 12)	-intron (NM_001013890, intron 4 of 12)	19462	NM_001013890	Ttc29
chr19	31764272	31764556	0.111311	10	0.0008674	0.00317834	Intergenic	Intergenic	-98414	NM_001013890	Ttc29
chr19	31808419	31808645	0.16459	10	0.00034417	0.00160537	Intergenic	Intergenic	-142532	NM_001013890	Ttc29
chr19	35083842	35083973	-0.1534	13	0.00015552	0.000942736	exon (NM_001109128, exon 3 of 3)	-exon (NM_001109128, exon 3 of 3)	-1624	NM_001106177	Hsf4
chr19	35527227	35527504	0.120563	10	0.00017988	0.00103466	Intergenic	Intergenic	5883	NM_001037193	Acd
chr19	36621384	36621943	0.171186	11	3.1174e-05	0.00032158	Intergenic	Intergenic	-96492	NM_172319	Has3
chr19	38386036	38386542	-0.118281	17	7.5174e-05	0.000576231	Intergenic	Intergenic	-926849	NM_001107426	Psmd7
chr19	38733850	38734110	-0.150514	11	0.00014824	0.000917402	Intergenic	Intergenic	-628536	NM_134393	Pmfbp1
chr19	38782886	38783168	-0.110391	29	6.3722e-06	0.000108537	Intergenic	Intergenic	-579489	NM_134393	Pmfbp1
chr19	39426854	39427124	-0.101792	10	9.4407e-05	0.000668509	intron (NM_001106185, intron 8 of 26)	-intron (NM_001106185, intron 8 of 26)	6541	NM_001106185	Dhx38
chr19	39868842	39869033	0.206225	12	7.21e-07	2.17365e-05	Intergenic	Intergenic	14775	NM_012668	Tat
chr19	40107345	40107573	0.141729	11	0.0054122	0.0127018	exon (NM_001106186, exon 2 of 2)	-exon (NM_001106186, exon 2 of 2)	5172	NM_001106186	Cmtr2
chr19	40701534	40701911	0.105516	10	0.017434	0.0314352	Intergenic	Intergenic	-25089	NM_001025766	Il34
chr19	45025886	45026282	-0.173624	12	2.9957e-06	6.26431e-05	Intergenic	Intergenic	509693	NM_001106188	Wwox
chr19	46877704	46878046	-0.144505	10	5.0439e-05	0.000443305	Intergenic	Intergenic	-143969	NM_001106189_1	Cdyl2
chr19	47400203	47400518	-0.226607	10	2.055e-05	0.00024283	intron (NM_001163273, intron 1 of 20)	-intron (NM_001163273, intron 1 of 20)	35866	NM_001163273	Cmip
chr19	47400620	47400933	0.119223	10	0.0035296	0.0091869	intron (NM_001163273, intron 1 of 20)	-intron (NM_001163273, intron 1 of 20)	36282	NM_001163273	Cmip
chr19	47582217	47582582	-0.11059	12	0.0018298	0.00557583	Intergenic	Intergenic	-28463	NM_017168	Plcg2
chr19	47640433	47640578	0.197376	10	2.6959e-05	0.00029062	intron (NM_017168, intron 2 of 6)	-intron (NM_017168, intron 2 of 6)	29643	NM_017168	Plcg2
chr19	47673624	47674079	0.106062	10	0.01937	0.034305	intron (NM_017168, intron 2 of 6)	-intron (NM_017168, intron 2 of 6)	62989	NM_017168	Plcg2
chr19	48245364	48245475	0.149761	10	0.00034096	0.00159338	Intergenic	Intergenic	-261753	NM_138889	Cdh13
chr19	49292477	49292684	-0.100235	10	0.00030177	0.00145859	intron (NM_138889, intron 5 of 13)	-intron (NM_138889, intron 5 of 13)	-296920	NM_173119	Hsbp1
chr19	49526285	49526376	-0.105376	10	6.9545e-05	0.000545853	intron (NM_138889, intron 10 of 13)	-intron (NM_138889, intron 10 of 13)	-63170	NM_173119	Hsbp1
chr19	49713174	49713389	-0.101252	11	5.0229e-05	0.000442292	intron (NM_133415, intron 8 of 12)	-intron (NM_133415, intron 8 of 12)	21815	NM_133415	Necab2
chr19	49737494	49738301	-0.235189	10	4.5422e-05	0.00041168	intron (NM_001192009, intron 3 of 9)	-intron (NM_001192009, intron 3 of 9)	6351	NM_001192009	Slc38a8
chr19	49889980	49890141	-0.118744	12	6.3652e-07	1.98133e-05	exon (NM_001107435, exon 2 of 3)	-exon (NM_001107435, exon 2 of 3)	2506	NM_001107435	Kcng4
chr19	49923279	49923613	-0.228543	10	3.4082e-07	1.21708e-05	promoter-TSS (NM_133581)	-promoter-TSS (NM_133581)	-993	NM_133581	Wfdc1
chr19	50039793	50039946	0.144646	10	0.00027454	0.00136768	Intergenic	Intergenic	90383	NM_001108452	Cotl1
chr19	50039957	50040096	0.395725	13	4.0301e-14	2.58907e-11	Intergenic	Intergenic	90226	NM_001108452	Cotl1
chr19	50114006	50114280	-0.123645	14	0.015614	0.028766	intron (NM_001108452, intron 2 of 3)	-intron (NM_001108452, intron 2 of 3)	16110	NM_001108452	Cotl1
chr19	50168689	50169112	-0.123837	13	0.021772	0.0375808	Intergenic	Intergenic	23066	NM_001017511	Klhl36
chr19	50312780	50313055	0.157452	12	0.00034415	0.00160537	promoter-TSS (NM_138518)	-promoter-TSS (NM_138518)	-792	NM_138518	Crispld2
chr19	50321856	50322293	0.134294	10	0.00089835	0.00326389	intron (NM_138518, intron 5 of 13)	-intron (NM_138518, intron 5 of 13)	8365	NM_138518	Crispld2
chr19	50375514	50375709	0.21997	10	0.00026683	0.00134252	exon (NM_138518, exon 14 of 14)	-exon (NM_138518, exon 14 of 14)	47608	NM_133394	Zdhhc7
chr19	50564616	50565053	0.182122	10	7.8637e-05	0.000592442	Intergenic	Intergenic	99281	NM_001107436	RGD1304884
chr19	50582171	50582442	-0.123616	10	0.0044196	0.0108924	Intergenic	Intergenic	116753	NM_001107436	RGD1304884
chr19	50641075	50641279	0.128203	12	1.1612e-05	0.000165804	Intergenic	Intergenic	175623	NM_001107436	RGD1304884
chr19	50718340	50718508	0.102186	10	0.00060243	0.00242668	Intergenic	Intergenic	209244	NM_001106190	Gins2
chr19	50735087	50735202	0.21442	10	1.4357e-07	6.23752e-06	Intergenic	Intergenic	192523	NM_001106190	Gins2
chr19	50870199	50870491	-0.107957	14	0.002515	0.0070804	Intergenic	Intergenic	57323	NM_001106190	Gins2
chr19	51035675	51036147	0.122961	10	0.00087505	0.00319915	Intergenic	Intergenic	11951	NM_017202	Cox4i1
chr19	51261041	51261370	0.127572	10	0.0063476	0.0143489	Intergenic	Intergenic	161118	NM_001008722	Irf8
chr19	51276386	51276693	-0.101423	15	0.0076708	0.016647	Intergenic	Intergenic	176452	NM_001008722	Irf8
chr19	51963050	51963315	0.118734	10	0.0072468	0.0159417	Intergenic	Intergenic	-12294	NM_001107437	Jph3
chr19	52362308	52362609	-0.169385	12	9.5013e-07	2.68662e-05	Intergenic	Intergenic	-164255	NM_001242627	Zfpm1
chr19	52420766	52421037	0.186163	10	4.4947e-05	0.000408592	Intergenic	Intergenic	-105812	NM_001242627	Zfpm1
chr19	52477534	52477864	0.105829	15	1.7077e-07	7.09541e-06	Intergenic	Intergenic	-49015	NM_001242627	Zfpm1
chr19	52509696	52509893	-0.144291	12	0.0004468	0.00195128	Intergenic	Intergenic	-16919	NM_001242627	Zfpm1
chr19	52535251	52535400	-0.125073	10	0.00021004	0.0011492	intron (NM_001242627, intron 1 of 7)	-intron (NM_001242627, intron 1 of 7)	8612	NM_001242627	Zfpm1
chr19	52571996	52572266	0.123569	11	0.00017868	0.00103077	intron (NM_001242627, intron 4 of 7)	-intron (NM_001242627, intron 4 of 7)	45417	NM_001242627	Zfpm1
chr19	52586235	52586304	0.104447	10	0.002331	0.0067049	exon (NM_001242627, exon 6 of 8)	-exon (NM_001242627, exon 6 of 8)	41538	NM_181364	Trhr2
chr19	52774364	52774688	0.11978	12	0.0084614	0.0178847	exon (NM_001077200, exon 43 of 51)	-exon (NM_001077200, exon 43 of 51)	8740	NM_001037094	Ctu2
chr19	52781537	52781730	-0.204264	10	1.4474e-06	3.68539e-05	intron (NM_001077200, intron 23 of 50)	-intron (NM_001077200, intron 23 of 50)	15848	NM_001037094	Ctu2
chr19	52850722	52850921	0.125158	11	0.0090027	0.0187938	exon (NM_001106192, exon 5 of 10)	-exon (NM_001106192, exon 5 of 10)	2263	NM_001106192	Cdt1
chr19	53274450	53274708	0.15885	10	0.00029613	0.00143785	Intergenic	Intergenic	92045	NM_207613	Cdh15
chr19	53438771	53439131	0.108359	10	0.0060259	0.0137802	intron (NM_031101, intron 4 of 5)	-intron (NM_031101, intron 4 of 5)	1318	NM_031101	Rpl13
chr19	53974613	53975141	0.154147	10	0.0057619	0.0133109	Intergenic	Intergenic	-16245	NM_013019	Rab4a
chr19	53981683	53981998	0.281202	10	2.4202e-09	2.3003e-07	Intergenic	Intergenic	-9281	NM_013019	Rab4a
chr19	54362739	54362897	-0.198847	12	4.6086e-06	8.66356e-05	Intergenic	Intergenic	35984	NR_037621	Cox6c-ps1
chr19	54443909	54444369	0.14765	15	2.7172e-08	1.62e-06	Intergenic	Intergenic	-35822	NM_001106196	Galnt2
chr19	54448093	54448470	-0.177546	13	9.3385e-06	0.000142784	Intergenic	Intergenic	-31679	NM_001106196	Galnt2
chr19	54467301	54467716	-0.145495	12	4.8105e-07	1.60006e-05	Intergenic	Intergenic	-12452	NM_001106196	Galnt2
chr19	54500660	54501409	0.158291	15	0.00015998	0.000963482	intron (NM_001106196, intron 2 of 13)	-intron (NM_001106196, intron 2 of 13)	21074	NM_001106196	Galnt2
chr19	54548995	54549513	0.117476	10	0.0029199	0.0079385	intron (NM_001106198, intron 4 of 6)	-intron (NM_001106198, intron 4 of 6)	59257	NM_001106198	Pgbd5
chr19	54562571	54562925	-0.153026	10	0.0027833	0.00765571	intron (NM_001106198, intron 1 of 6)	-intron (NM_001106198, intron 1 of 6)	45763	NM_001106198	Pgbd5
chr19	54616296	54616793	0.110844	11	0.0081999	0.0174704	Intergenic	Intergenic	-8034	NM_001106198	Pgbd5
chr19	54829917	54830398	-0.171158	12	7.7765e-10	8.80229e-08	intron (NM_001109134, intron 1 of 3)	-intron (NM_001109134, intron 1 of 3)	9380	NM_001109134	RGD1559896
chr19	54860128	54860363	0.194225	10	1.4652e-06	3.72057e-05	intron (NM_001136162, intron 13 of 20)	-intron (NM_001136162, intron 13 of 20)	-20708	NM_001109134	RGD1559896
chr19	54915993	54916244	-0.122162	10	0.0052651	0.0124583	intron (NM_001106197, intron 5 of 5)	-intron (NM_001106197, intron 5 of 5)	11398	NM_001106197	Arv1
chr19	55312385	55312793	0.152875	14	0.00036423	0.00167755	intron (NM_175596, intron 5 of 11)	-intron (NM_175596, intron 5 of 11)	47465	NM_175596	Disc1
chr19	55474131	55474356	0.113816	12	0.0034649	0.00905826	Intergenic	Intergenic	209120	NM_175596	Disc1
chr19	56002970	56003188	0.12895	11	0.00042693	0.00188723	Intergenic	Intergenic	64034	NM_001134573	Ntpcr
chr19	56641597	56641897	0.188359	11	4.8881e-05	0.000433488	Intergenic	Intergenic	221420	NM_152935	Tomm20
chr19	56766553	56766803	0.123108	10	0.028755	0.0471951	Intergenic	Intergenic	96489	NM_152935	Tomm20
chr2	505603	505803	-0.104372	10	0.0016491	0.00514512	Intergenic	Intergenic	-948175	NM_030836	Erap1
chr2	614716	614788	-0.101753	10	0.00032232	0.00152942	Intergenic	Intergenic	-839126	NM_030836	Erap1
chr2	848073	848215	0.147099	13	7.9129e-05	0.000595428	Intergenic	Intergenic	-605734	NM_030836	Erap1
chr2	990985	991128	-0.102538	10	0.00049348	0.00209346	Intergenic	Intergenic	-462821	NM_030836	Erap1
chr2	5808596	5808698	-0.101154	10	0.00033779	0.00158332	Intergenic	Intergenic	-14543	NM_031130	Nr2f1
chr2	6606636	6606687	0.183339	11	5.6272e-07	1.79192e-05	Intergenic	Intergenic	-812558	NM_031130	Nr2f1
chr2	14113716	14113971	0.100488	10	0.018994	0.0337704	Intergenic	Intergenic	-66050	NM_052981	Ccnh
chr2	23355335	23355464	0.114521	10	0.016532	0.0301101	Intergenic	Intergenic	116023	NM_001008372	Papd4
chr2	24523805	24524065	0.125452	10	0.0099439	0.0203727	intron (NM_001100636, intron 3 of 8)	-intron (NM_001100636, intron 3 of 8)	62934	NM_001100636	Scamp1
chr2	25023238	25023386	0.163176	10	1.967e-05	0.000235416	Intergenic	Intergenic	-153287	NM_001100523	Otp
chr2	25740616	25741051	-0.126494	10	0.0081994	0.0174703	Intergenic	Intergenic	48113	NM_001025729	Zbed3
chr2	27137858	27138098	-0.14747	10	0.000112	0.000752705	intron (NM_013134, intron 6 of 19)	-intron (NM_013134, intron 6 of 19)	11602	NM_013134	Hmgcr
chr2	27703697	27703813	0.125669	10	3.3057e-05	0.000332376	intron (NM_001003401, intron 1 of 4)	-intron (NM_001003401, intron 1 of 4)	-31524	NM_001011946	Hexb
chr2	28522847	28523085	-0.145725	10	0.004881	0.011774	intron (NM_001108542, intron 35 of 35)	-intron (NM_001108542, intron 35 of 35)	244601	NM_001108542	Arhgef28
chr2	29021496	29021803	0.112794	10	0.0092625	0.0192255	Intergenic	Intergenic	77945	NM_134337	Foxd1
chr2	29222848	29223134	-0.127455	15	0.0033919	0.0089014	Intergenic	Intergenic	36367	NM_001024298	Tmem174
chr2	31419199	31419280	-0.108436	10	0.0056763	0.0131677	exon (NM_001108936, exon 2 of 7)	-exon (NM_001108936, exon 2 of 7)	5154	NM_001108936	Marveld2
chr2	32602513	32602923	-0.197157	14	2.3343e-11	4.44863e-09	TTS (NM_013005)	-TTS (NM_013005)	72632	NM_013005	Pik3r1
chr2	33482980	33483119	-0.145814	16	4.1936e-05	0.000390572	Intergenic	Intergenic	-125984	NM_001106405	Cd180
chr2	33483246	33483333	-0.110013	10	0.013227	0.025368	Intergenic	Intergenic	-125744	NM_001106405	Cd180
chr2	34663134	34663403	0.139706	11	5.1463e-06	9.39539e-05	Intergenic	Intergenic	-27727	NM_020092	Srek1
chr2	38762806	38762978	0.121657	10	3.2452e-06	6.64937e-05	Intergenic	Intergenic	-499089	NM_001277209	Smim15
chr2	41654116	41654645	0.122818	10	0.0031363	0.00839726	intron (NM_133536, intron 1 of 4)	-intron (NM_133536, intron 1 of 4)	18178	NM_133536	Rab3c
chr2	43303098	43303481	0.134333	10	0.0014055	0.00456717	Intergenic	Intergenic	-177350	NM_053887	Map3k1
chr2	43307396	43307708	-0.128894	10	0.0006245	0.00247711	Intergenic	Intergenic	-181612	NM_053887	Map3k1
chr2	45563180	45563518	0.160788	10	1.3661e-05	0.000184283	Intergenic	Intergenic	339142	NM_001007634	Pelo
chr2	51711834	51712045	0.129221	12	3.0986e-09	2.82298e-07	exon (NM_053700, exon 3 of 3)	-exon (NM_053700, exon 3 of 3)	23646	NM_053700	Ccl28
chr2	51990291	51990465	0.103404	10	0.0013472	0.00442196	Intergenic	Intergenic	-145744	NM_001100698	Zfp131
chr2	57462841	57462993	-0.196224	10	4.2969e-10	5.44075e-08	intron (NM_001013909, intron 17 of 17)	-intron (NM_001013909, intron 17 of 17)	63605	NM_019139	Gdnf
chr2	58050890	58050929	0.175906	10	0.00029059	0.00141869	Intergenic	Intergenic	296761	NM_019225	Slc1a3
chr2	58299273	58299562	0.119322	11	0.00058578	0.00237784	intron (NM_001289941, intron 2 of 8)	-intron (NM_019225, intron 3 of 9)	48253	NM_019225	Slc1a3
chr2	60290655	60291159	0.102705	10	6.3389e-05	0.000515117	Intergenic	Intergenic	-12354	NM_001134436	C1qtnf3
chr2	78751520	78751664	-0.138358	10	0.00020014	0.00110983	Intergenic	Intergenic	-141427	NM_001108545	Fbxl7
chr2	80114082	80114433	-0.126036	10	0.0032627	0.0086627	Intergenic	Intergenic	71062	NM_053976	Krt18
chr2	83370529	83370751	-0.114968	12	0.001222	0.0040989	exon (NM_001191565, exon 4 of 4)	-exon (NM_001191565, exon 4 of 4)	75982	NM_001191565	Ankrd33b
chr2	93333866	93334348	0.156861	10	3.1673e-05	0.000325291	intron (NM_001017466, intron 2 of 4)	-intron (NM_001017466, intron 2 of 4)	48045	NM_001017466	Chmp4c
chr2	94369551	94370139	0.145663	10	0.0020623	0.00611714	Intergenic	Intergenic	199191	NM_024489	Zbtb10
chr2	94880419	94880656	-0.111445	10	0.02054	0.0358821	exon (NM_001106421, exon 6 of 6)	-exon (NM_001106421, exon 6 of 6)	30335	NM_001106421	Tpd52
chr2	96278556	96278950	0.219216	10	8.0892e-07	2.39237e-05	Intergenic	Intergenic	-77330	NM_013110	Il7
chr2	97813360	97813459	-0.112097	10	0.0085001	0.0179371	Intergenic	Intergenic	-548481	NM_017234	Pex2
chr2	104465978	104466193	-0.134358	10	0.00066494	0.00259427	Intergenic	Intergenic	-36266	NM_031080	Pde7a
chr2	105348601	105348726	-0.135907	10	0.0039062	0.00991629	Intergenic	Intergenic	-43732	NM_031043	Gyg1
chr2	105353597	105353695	0.101538	10	4.8009e-08	2.60651e-06	Intergenic	Intergenic	-48714	NM_031043	Gyg1
chr2	112294081	112294188	0.124235	10	3.8774e-05	0.000370795	Intergenic	Intergenic	-345990	NM_053868	Nlgn1
chr2	113222703	113222922	-0.120178	10	0.0066355	0.0148836	Intergenic	Intergenic	18509	NM_145681	Tnfsf10
chr2	113269209	113269463	0.145793	10	3.8516e-12	9.22236e-10	promoter-TSS (NM_032075)	-promoter-TSS (NM_032075)	-287	NM_032075	Ghsr
chr2	114397489	114397738	-0.131082	12	0.0025289	0.00710936	Intergenic	Intergenic	301736	NR_032312	Mir551b
chr2	114973567	114973684	0.165202	13	0.0025689	0.00719473	Intergenic	Intergenic	-90950	NM_001106423_1	Mecom
chr2	118528842	118529231	-0.127568	16	2.8827e-06	6.10763e-05	intron (NM_022548, intron 2 of 3)	-intron (NM_022548, intron 2 of 3)	2047	NM_022548	Zmat3
chr2	118593758	118593892	0.252935	10	1.2907e-07	5.74631e-06	Intergenic	Intergenic	-46452	NM_133399_1	Pik3ca
chr2	120215023	120215343	0.207639	13	5.4672e-09	4.47843e-07	Intergenic	Intergenic	-60225	NM_001107667	Ccdc39
chr2	120231368	120232170	0.112758	10	0.010085	0.0205917	Intergenic	Intergenic	-76811	NM_001107667	Ccdc39
chr2	120871552	120872130	-0.105213	10	0.010157	0.0207104	Intergenic	Intergenic	-97180	NM_001109181	Sox2
chr2	121079626	121079703	0.121495	10	0.00555	0.0129398	Intergenic	Intergenic	110644	NM_001109181	Sox2
chr2	121095029	121095320	0.104651	10	0.0098738	0.0202602	Intergenic	Intergenic	126154	NM_001109181	Sox2
chr2	122938405	122938585	0.134969	10	1.3256e-07	5.87368e-06	Intergenic	Intergenic	41262	NM_013132	Anxa5
chr2	123599183	123599268	-0.106306	10	0.010521	0.0212084	promoter-TSS (NM_001006977)	-promoter-TSS (NM_001006977)	91	NM_001006977	Adad1
chr2	125055616	125055823	0.15398	10	7.1356e-07	2.15642e-05	Intergenic	Intergenic	351916	NM_001191606	Ankrd50
chr2	140032324	140032713	0.157499	10	7.9443e-05	0.000596298	Intergenic	Intergenic	-87791	NM_138526	Noct
chr2	140449429	140449684	-0.255131	11	3.3404e-07	1.19515e-05	intron (NM_001109558, intron 1 of 7)	-intron (NM_001109558, intron 1 of 7)	7022	NM_001109558	Setd7
chr2	140536881	140537412	-0.114633	10	0.0027611	0.00760754	Intergenic	Intergenic	-9792	NM_001106430	Mgst2
chr2	142551322	142551682	0.112878	10	0.024581	0.041475	intron (NM_001245978, intron 2 of 23)	-intron (NM_001245978, intron 2 of 23)	52805	NM_001245978	Frem2
chr2	146734698	146735013	-0.102051	10	0.0019469	0.00585434	exon (NM_001024869, exon 4 of 7)	-exon (NM_001024869, exon 4 of 7)	66003	NM_053785	Tm4sf4
chr2	147789194	147789231	-0.270492	10	2.8524e-09	2.63675e-07	intron (NM_001191960, intron 2 of 3)	-intron (NM_001191960, intron 2 of 3)	35183	NM_001191960	Tsc22d2
chr2	155796551	155796586	0.14655	10	0.00036061	0.00166356	Intergenic	Intergenic	-26936	NM_053662	Ccnl1
chr2	158738090	158738608	0.12027	10	0.022772	0.0389256	Intergenic	Intergenic	28088	NM_053390	Il12a
chr2	165896291	165896816	0.161604	10	0.010973	0.0218868	Intergenic	Intergenic	108066	NM_001029922	Zbbx
chr2	170423618	170423695	-0.225618	12	1.1015e-08	7.86698e-07	Intergenic	Intergenic	164330	NM_001107684	Rapgef2
chr2	170476586	170476688	0.11843	10	0.0002162	0.00117277	exon (NM_001107684, exon 20 of 21)	-exon (NM_001107684, exon 20 of 21)	111350	NM_001107684	Rapgef2
chr2	171370243	171370489	-0.141495	10	5.8353e-05	0.000489506	exon (NM_199105, exon 2 of 5)	-exon (NM_199105, exon 2 of 5)	2081	NM_199105	Fam198b
chr2	175487699	175488281	0.172667	13	0.0010176	0.00357543	Intergenic	Intergenic	8670	NM_001100700	Sfrp2
chr2	175941313	175941475	-0.104228	13	3.7048e-05	0.000360379	exon (NM_001108552, exon 6 of 16)	-exon (NM_001108552, exon 6 of 16)	33315	NM_001108552	Trim2
chr2	177762589	177762749	-0.176893	10	0.0025894	0.00723905	Intergenic	Intergenic	-120867	NM_001134592	Fam160a1
chr2	179864401	179864834	-0.104215	21	1.7364e-06	4.21774e-05	intron (NM_022212, intron 6 of 21)	-intron (NM_022212, intron 6 of 21)	7429	NM_022212	Insrr
chr2	181219264	181219453	-0.10346	10	9.1139e-06	0.000140442	exon (NM_012624, exon 8 of 11)	-exon (NM_012624, exon 8 of 11)	4506	NM_012624	Pklr
chr2	181264567	181264724	0.100291	10	0.0029905	0.00809216	TTS (NM_031724)	-TTS (NM_031724)	462	NM_001107690	Fam189b
chr2	181857575	181857843	-0.128271	20	0.0058409	0.0134668	intron (NM_019315, intron 7 of 7)	-intron (NM_019315, intron 7 of 7)	-77537	NM_031006	Adar
chr2	182513526	182513925	-0.170357	10	5.0128e-06	9.2329e-05	Intergenic	Intergenic	16964	NM_001033895	Crtc2
chr2	182518155	182518353	-0.240028	10	6.4178e-09	5.0789e-07	Intergenic	Intergenic	-18871	NM_001024888	Gatad2b
chr2	182812274	182812941	-0.123899	10	0.0014175	0.00459577	exon (NM_001108557, exon 3 of 3)	-exon (NM_001108557, exon 3 of 3)	5044	NM_001108557	S100a16
chr2	186533525	186533613	0.164906	10	0.0013937	0.00453672	Intergenic	Intergenic	-86791	NM_001004095	S100a11
chr2	190203850	190204157	-0.132316	12	2.4673e-07	9.46212e-06	exon (NM_001025118, exon 6 of 9)	-exon (NM_001025118, exon 6 of 9)	5189	NM_001025118	Fam63a
chr2	190469233	190469387	0.174285	10	5.0723e-08	2.71441e-06	intron (NM_001108949, intron 1 of 14)	-intron (NM_001108949, intron 1 of 14)	201	NM_001108949	Hormad1
chr2	190765651	190766094	0.111388	10	1.4767e-05	0.000194291	Intergenic	Intergenic	30184	NM_001025119	Plekho1
chr2	191156901	191157537	-0.116024	10	0.0018681	0.00566251	Intergenic	Intergenic	-53277	NM_001100836	Fcgr1a
chr2	191292406	191292527	0.106863	10	0.0003743	0.00171381	Intergenic	Intergenic	-37177	NM_001012080	Hfe2
chr2	192803268	192803398	0.104927	11	0.0053419	0.0125783	Intergenic	Intergenic	-51954	NM_024358	Notch2
chr2	193075739	193075824	-0.14798	12	4.3308e-05	0.000399823	intron (NM_001004096, intron 4 of 4)	-intron (NM_001004096, intron 4 of 4)	9355	NM_001004096	Reg4
chr2	193075827	193075974	0.166649	16	1.3002e-06	3.38153e-05	intron (NM_001004096, intron 4 of 4)	-intron (NM_001004096, intron 4 of 4)	9474	NM_001004096	Reg4
chr2	193918692	193918938	-0.249254	10	5.9008e-13	1.79197e-10	Intergenic	Intergenic	-97087	NM_001106451	Tbx15
chr2	193932155	193932400	0.210827	10	2.4961e-07	9.54318e-06	Intergenic	Intergenic	-83624	NM_001106451	Tbx15
chr2	195131887	195132554	-0.157871	11	0.00034353	0.00160459	intron (NM_001013201, intron 3 of 13)	-intron (NM_001013201, intron 3 of 13)	15511	NM_001013201	Gdap2
chr2	198223209	198223324	-0.226696	10	5.5654e-06	9.92762e-05	Intergenic	Intergenic	-2864	NM_001012182	Sike1
chr2	203496249	203496572	0.120763	10	0.006734	0.0150683	intron (NM_031154, intron 2 of 7)	-intron (NM_031154, intron 2 of 7)	401	NM_031154	Gstm7
chr2	203981424	203981531	-0.129074	10	0.00021413	0.00116476	exon (NM_001191110, exon 1 of 34)	-exon (NM_001191110, exon 1 of 34)	1655	NM_001191110	Celsr2
chr2	204598317	204598412	0.333987	10	1.6122e-09	1.63199e-07	intron (NM_001163568, intron 2 of 10)	-intron (NM_001163568, intron 2 of 10)	24829	NM_001163568	Fam102b
chr2	205501645	205501804	-0.160883	11	0.020362	0.0356578	intron (NM_001106465, intron 5 of 7)	-intron (NM_001106465, intron 5 of 7)	304524	NM_001106465	Ntng1
chr2	215738295	215738864	-0.114343	10	0.0024471	0.00695689	intron (NM_031027, intron 19 of 21)	-intron (NM_031027, intron 19 of 21)	510596	NM_001005555	Ptbp2
chr2	217792687	217792806	0.181401	10	0.0013819	0.00450688	Intergenic	Intergenic	32769	NM_001135879	Tmem56
chr2	219119044	219119237	-0.141325	11	0.00052895	0.00220094	intron (NM_001107722, intron 3 of 11)	-intron (NM_001107722, intron 3 of 11)	43935	NM_001107722	Bcar3
chr2	219811447	219812033	0.170821	14	0.0025273	0.00710649	intron (NM_001191963, intron 4 of 4)	-intron (NM_001191963, intron 4 of 4)	-82564	NM_001106469	Myoz2
chr2	224497373	224497562	-0.102271	10	0.0098041	0.0201437	Intergenic	Intergenic	318322	NM_001044290	Larp7
chr2	224870343	224870445	0.169364	12	1.4653e-07	6.33488e-06	Intergenic	Intergenic	-54604	NM_001044290	Larp7
chr2	224991953	224992080	-0.124148	14	0.0094606	0.0195676	Intergenic	Intergenic	-75678	NM_001014044	Tifa
chr2	227058975	227059407	-0.137215	11	0.00054586	0.00225099	Intergenic	Intergenic	112618	NM_134383	Elovl6
chr2	227123629	227123870	-0.10658	10	0.0001747	0.00102026	exon (NM_012842, exon 21 of 23)	-exon (NM_012842, exon 21 of 23)	71312	NM_012842	Egf
chr2	227231227	227231543	-0.14346	12	0.00023667	0.00124934	Intergenic	Intergenic	35512	NM_001107726	Rrh
chr2	228940535	228940942	0.203081	10	3.8365e-05	0.000368203	Intergenic	Intergenic	-65060	NM_001106471	Papss1
chr2	229152350	229152535	0.230638	10	9.7985e-11	1.56412e-08	Intergenic	Intergenic	146644	NM_001106471	Papss1
chr2	229383972	229384409	-0.183148	10	3.1336e-05	0.000322539	Intergenic	Intergenic	-158012	NM_001106472	Dkk2
chr2	233113756	233113864	0.253514	12	5.0986e-07	1.66913e-05	exon (NM_001276711, exon 13 of 25)	-exon (NM_001276711, exon 13 of 25)	97381	NM_001276711	Nfkb1
chr2	237458980	237459123	0.116251	10	0.0057619	0.0133109	Intergenic	Intergenic	665565	NM_001100993	Stpg2
chr2	242260575	242261257	0.105449	12	0.021226	0.0368753	Intergenic	Intergenic	-237158	NM_001009708	Lmo4
chr2	242501658	242502223	-0.132745	10	9.0663e-05	0.00065522	intron (NM_001009708, intron 2 of 4)	-intron (NM_001009708, intron 2 of 4)	3867	NM_001009708	Lmo4
chr2	244508955	244509338	0.144831	12	0.0081875	0.0174703	intron (NM_023969, intron 1 of 1)	-intron (NM_023969, intron 1 of 1)	77358	NM_023969	Lpar3
chr2	250650286	250650640	0.127546	18	1.1542e-09	1.23887e-07	Intergenic	Intergenic	-2477	NM_001037210	Gipc2
chr2	250820376	250820492	-0.106313	14	4.9305e-07	1.63126e-05	Intergenic	Intergenic	-36669	NM_139230	Nexn
chr2	251004053	251004324	0.10254	11	0.00079222	0.00296096	intron (NM_001011953, intron 6 of 7)	-intron (NM_001011953, intron 6 of 7)	28080	NM_001011953	Pigk
chr2	251410646	251410998	0.156561	10	6.4178e-09	5.0789e-07	intron (NM_019123, intron 3 of 4)	-intron (NM_019123, intron 3 of 4)	290728	NM_019123	St6galnac3
chr2	251602460	251602721	0.10007	10	2.2953e-06	5.15552e-05	intron (NM_019123, intron 1 of 4)	-intron (NM_019123, intron 1 of 4)	98959	NM_019123	St6galnac3
chr20	1819400	1819475	0.129115	10	0.0011355	0.00387274	Intergenic	Intergenic	-8157	NM_001011665	Trim26
chr20	2645411	2645579	0.169564	10	1.4549e-07	6.30451e-06	Intergenic	Intergenic	-3513	NM_001044283	Snx3
chr20	2645955	2646248	0.113613	12	7.2413e-05	0.000560945	Intergenic	Intergenic	-2906	NM_001044283	Snx3
chr20	3007136	3007571	0.123744	10	0.00044617	0.0019499	exon (NM_213610, exon 2 of 6)	-exon (NM_213610, exon 2 of 6)	1741	NM_213610	RGD1302996
chr20	3451943	3452115	0.229301	10	0.0025686	0.00719443	Intergenic	Intergenic	-16573	NM_001008833	RT1-CE10
chr20	3782099	3782530	-0.108247	10	0.014354	0.0270681	TTS (NM_212531)	-TTS (NM_212531)	-5053	NM_198739	Ly6g5c
chr20	4072610	4073048	0.112275	10	0.0064901	0.0146127	TTS (NM_172222)	-TTS (NM_172222)	705	NM_212466	Cfb
chr20	4266680	4267027	-0.152151	10	0.00025202	0.00128778	intron (NM_001002827, intron 25 of 29)	-intron (NM_031504, intron 32 of 40)	-5110	NM_001003974	Gpsm3
chr20	4279200	4279439	-0.15307	12	7.7238e-13	2.25396e-10	exon (NM_001002827, exon 10 of 30)	-exon (NM_001002827, exon 10 of 30)	7992	NM_001002827	Notch4
chr20	4692398	4692658	0.14605	10	0.012693	0.0245265	Intergenic	Intergenic	-5443	NM_001008831	RT1-Ba
chr20	4782799	4783136	0.144646	13	3.1435e-06	6.48366e-05	intron (NM_032056, intron 3 of 11)	-intron (NM_032056, intron 3 of 11)	1520	NM_032056	Tap2
chr20	4790472	4790706	-0.125563	10	0.0020287	0.00603905	exon (NM_032055, exon 11 of 11)	-exon (NM_032055, exon 11 of 11)	-1366	NM_080767	Psmb8
chr20	4802821	4803042	0.142693	10	1.351e-05	0.000183106	exon (NM_012708, exon 2 of 6)	-exon (NM_012708, exon 2 of 6)	1745	NM_012708	Psmb9
chr20	4837509	4837790	-0.185686	10	6.3389e-05	0.000515117	promoter-TSS (NM_198740)	-promoter-TSS (NM_198740)	-878	NM_198740	RT1-DMb
chr20	4913419	4913842	0.163557	10	6.7433e-05	0.000535039	Intergenic	Intergenic	-5864	NM_001008848	RT1-Ha
chr20	4938139	4938484	0.147388	10	0.00069531	0.0026836	intron (NM_212528, intron 22 of 61)	-intron (NM_212528, intron 22 of 61)	14998	NM_212528	Col11a2
chr20	4940166	4940513	-0.1007	10	0.0074073	0.0162028	exon (NM_212528, exon 17 of 62)	-exon (NM_212528, exon 17 of 62)	12970	NM_212528	Col11a2
chr20	4955752	4956055	-0.112676	10	0.00053077	0.00220581	intron (NM_206849, intron 7 of 9)	-intron (NM_206849, intron 7 of 9)	-2594	NM_212528	Col11a2
chr20	5094772	5094993	0.104608	10	9.2309e-08	4.32082e-06	exon (NM_212491, exon 7 of 15)	-exon (NM_212491, exon 7 of 15)	2500	NM_212491	Wdr46
chr20	5354318	5354715	0.191095	10	1.5099e-05	0.000197249	intron (NM_013138, intron 55 of 58)	-intron (NM_013138, intron 55 of 58)	15211	NM_001108528	Uqcc2
chr20	5429644	5429876	-0.126625	10	0.0011355	0.00387274	intron (NM_001039032, intron 4 of 6)	-intron (NM_001039032, intron 4 of 6)	7096	NM_001039032	Lemd2
chr20	5430699	5431114	-0.121588	10	0.0046986	0.0114334	intron (NM_001039032, intron 3 of 6)	-intron (NM_001039032, intron 3 of 6)	5949	NM_001039032	Lemd2
chr20	5460042	5460276	0.249486	10	3.4027e-06	6.92272e-05	Intergenic	Intergenic	-8407	NM_001110056	Mln
chr20	5511375	5512365	-0.117884	14	0.0040163	0.0101324	Intergenic	Intergenic	-60118	NM_001110056	Mln
chr20	5536918	5537004	0.122972	11	0.0017805	0.00546124	Intergenic	Intergenic	-85209	NM_001110056	Mln
chr20	5587644	5588123	-0.127175	10	0.015988	0.029309	Intergenic	Intergenic	-136132	NM_001110056	Mln
chr20	5815127	5815395	0.182735	10	7.8601e-06	0.000126388	intron (NM_001024243, intron 1 of 4)	-intron (NM_001024243, intron 1 of 4)	26372	NM_001024243	Nudt3
chr20	5849223	5849721	-0.121139	12	0.003186	0.00850188	intron (NM_031109, intron 5 of 5)	-intron (NM_031109, intron 5 of 5)	4422	NM_031109	Rps10
chr20	5927783	5928191	-0.184938	10	2.2483e-07	8.7981e-06	exon (NM_001109530, exon 7 of 7)	-exon (NM_001109530, exon 7 of 7)	14104	NM_001109530	Spdef
chr20	5986664	5987049	-0.161327	12	9.0671e-05	0.00065522	intron (NM_001047939, intron 12 of 14)	-intron (NM_001047939, intron 12 of 14)	21936	NM_001047939	LOC499407
chr20	5988679	5988919	-0.20799	10	8.3985e-08	4.03744e-06	intron (NM_001047939, intron 12 of 14)	-intron (NM_001047939, intron 12 of 14)	23878	NM_001047939	LOC499407
chr20	6095168	6095547	0.108152	10	7.172e-05	0.000557884	Intergenic	Intergenic	24155	NM_001008350	Taf11
chr20	6238099	6238434	-0.211152	10	1.4652e-06	3.72057e-05	intron (NM_001107613, intron 11 of 23)	-intron (NM_001107613, intron 11 of 23)	55145	NM_001007695	Tcp11
chr20	6256034	6256285	-0.126592	10	0.00021829	0.00118042	intron (NM_001107613, intron 12 of 23)	-intron (NM_001107613, intron 12 of 23)	37252	NM_001007695	Tcp11
chr20	6256761	6257203	-0.152756	12	1.4362e-05	0.000191192	exon (NM_001107613, exon 13 of 24)	-exon (NM_001107613, exon 13 of 24)	36430	NM_001007695	Tcp11
chr20	6282883	6283594	0.118612	17	0.0099452	0.0203742	TTS (NM_001007695)	-TTS (NM_001007695)	10173	NM_001007695	Tcp11
chr20	6440506	6440639	0.179657	10	0.00051181	0.00214684	exon (NM_001134755, exon 10 of 14)	-exon (NM_001134755, exon 10 of 14)	-8025	NM_001191717	Def6
chr20	6514927	6515513	0.136279	13	0.0026396	0.00734922	intron (NM_013141, intron 2 of 7)	-intron (NM_013141, intron 2 of 7)	36112	NM_013141	Ppard
chr20	6638772	6639200	0.144528	10	0.00058109	0.00236211	exon (NM_001012174, exon 11 of 11)	-exon (NM_001012174, exon 11 of 11)	-34637	NM_001107642	Tulp1
chr20	6805946	6806063	0.178138	10	2.2953e-06	5.15552e-05	Intergenic	Intergenic	-1417	NM_013139	Clps
chr20	7185210	7185359	-0.232784	10	3.6961e-06	7.31252e-05	Intergenic	Intergenic	45901	NM_001191841	Pnpla1
chr20	7358210	7358389	0.114962	10	0.0070376	0.0156315	Intergenic	Intergenic	-18025	NM_080782	Cdkn1a
chr20	7616745	7617163	-0.106538	10	0.0012059	0.00405759	Intergenic	Intergenic	-19328	NM_001170481	Pi16
chr20	7707716	7707909	-0.114003	16	7.4356e-06	0.000121179	Intergenic	Intergenic	23049	NM_001107617	Fgd2
chr20	8450370	8450674	-0.149343	12	0.0003092	0.00148585	intron (NM_001012175, intron 1 of 4)	-intron (NM_001012175, intron 1 of 4)	66690	NM_001012175	Zfand3
chr20	8533148	8533330	0.114847	10	1.0206e-05	0.000151972	intron (NM_001013073, intron 7 of 7)	-intron (NM_001013073, intron 7 of 7)	149407	NM_001012175	Zfand3
chr20	8652692	8652984	0.24066	12	3.7335e-07	1.30767e-05	intron (NM_001013073, intron 3 of 7)	-intron (NM_001013073, intron 3 of 7)	224377	NM_001013073	Btbd9
chr20	9235418	9235567	0.126603	10	5.2296e-09	4.35058e-07	intron (NM_012728, intron 3 of 11)	-intron (NM_012728, intron 3 of 11)	9612	NM_012728	Glp1r
chr20	9709085	9709604	-0.145328	12	0.027297	0.0453006	intron (NM_001011944, intron 3 of 19)	-intron (NM_001011944, intron 3 of 19)	19684	NM_001011944	Slc37a1
chr20	9956989	9957187	0.148159	10	1.8694e-06	4.46469e-05	exon (NM_022607, exon 3 of 4)	-exon (NM_022607, exon 3 of 4)	5979	NM_022607	Ndufv3
chr20	10060495	10060620	-0.182685	15	1.8483e-07	7.52065e-06	intron (NM_012522, intron 5 of 15)	-intron (NM_012522, intron 5 of 15)	14962	NM_012522	Cbs
chr20	10259105	10259492	0.235885	12	1.3377e-07	5.90628e-06	Intergenic	Intergenic	32436	NM_021693	Sik1
chr20	10308421	10308604	0.139197	10	1.8922e-06	4.48758e-05	Intergenic	Intergenic	-16778	NM_021693	Sik1
chr20	10424887	10425023	0.133763	10	0.0095299	0.0196767	intron (NM_001127683, intron 5 of 8)	-intron (NM_001127683, intron 5 of 8)	27311	NM_001127683	Hsf2bp
chr20	10699300	10699752	-0.140172	10	0.0012585	0.00418898	Intergenic	Intergenic	-20518	NM_001106378	Agpat3
chr20	10708789	10709100	-0.113987	12	0.00010411	0.00071784	Intergenic	Intergenic	-11099	NM_001106378	Agpat3
chr20	10727518	10727941	-0.103903	10	0.0059812	0.0137048	intron (NM_001106378, intron 1 of 8)	-intron (NM_001106378, intron 1 of 8)	7686	NM_001106378	Agpat3
chr20	10819368	10819621	-0.149201	10	0.00019068	0.00107558	intron (NM_001173528, intron 14 of 22)	-intron (NM_001173528, intron 14 of 22)	-16599	NM_001168653	Pwp2
chr20	10859116	10859326	-0.102071	12	9.5981e-10	1.05137e-07	exon (NM_001004225, exon 7 of 7)	-exon (NM_001004225, exon 7 of 7)	7666	NM_001004225	RGD1303003
chr20	11037889	11038129	0.168784	10	9.8295e-05	0.0006886	intron (NM_001008351, intron 3 of 6)	-intron (NM_001008351, intron 3 of 6)	2910	NM_001008351	RGD1309594
chr20	11086849	11087063	0.112351	10	0.00040688	0.0018184	intron (NM_001011559, intron 20 of 31)	-intron (NM_001011559, intron 20 of 31)	-20189	NM_145679	Lrrc3
chr20	11424156	11424532	-0.125369	12	0.01045	0.0210994	exon (NM_001013238, exon 3 of 6)	-exon (NM_001013238, exon 3 of 6)	7595	NM_001013238	Pttg1ip
chr20	11688033	11688544	0.135469	10	0.0015815	0.00498807	intron (NM_012894, intron 2 of 10)	-intron (NM_001111057, intron 2 of 10)	71571	NM_001111056	Adarb1
chr20	11922193	11922620	-0.107778	12	0.0037659	0.00964865	intron (NM_053489, intron 2 of 40)	-intron (NM_053489, intron 2 of 40)	49948	NM_053489	Col18a1
chr20	11938075	11938185	0.136065	10	0.00078731	0.00294408	exon (NM_053489, exon 3 of 41)	-exon (NM_053489, exon 3 of 41)	63162	NM_017299	Slc19a1
chr20	11977373	11977594	-0.120606	10	0.012781	0.0246583	intron (NM_053489, intron 36 of 40)	-intron (NM_053489, intron 36 of 40)	23808	NM_017299	Slc19a1
chr20	12335737	12335908	-0.145501	10	0.0007943	0.00296458	Intergenic	Intergenic	-100960	NM_001100741	Col6a2
chr20	12678474	12678719	0.113781	10	0.010669	0.0214523	Intergenic	Intergenic	-21740	NM_001191564	Dip2a
chr20	18028657	18028823	-0.171067	10	0.0038459	0.00979917	Intergenic	Intergenic	-11947	NM_001108530	Ube2d1
chr20	18092438	18092868	-0.104091	11	0.0078971	0.0169969	Intergenic	Intergenic	-7976	NM_031326	Tfam
chr20	18415380	18415895	0.112445	12	0.0052222	0.0123905	intron (NM_001108531, intron 2 of 19)	-intron (NM_001108531, intron 2 of 19)	127559	NM_001108531	Bicc1
chr20	18735399	18735926	0.111344	12	8.8458e-09	6.60834e-07	Intergenic	Intergenic	-80047	NM_001012076	Phyhipl
chr20	18848400	18848658	0.101941	10	0.00035727	0.00165264	exon (NM_001012076, exon 5 of 5)	-exon (NM_001012076, exon 5 of 5)	32819	NM_001012076	Phyhipl
chr20	19129746	19130265	-0.11486	10	0.0008523	0.00313439	Intergenic	Intergenic	16515	NM_001304741	Mrln
chr20	19243595	19243868	0.127753	10	1.2777e-05	0.000176241	Intergenic	Intergenic	-97211	NM_001304741	Mrln
chr20	20190081	20190276	-0.142563	10	7.4785e-13	2.19956e-10	Intergenic	Intergenic	-24110	NM_001107622	Rhobtb1
chr20	21345448	21345606	-0.160207	10	2.5339e-08	1.53402e-06	Intergenic	Intergenic	88633	NM_001107625	Rtkn2
chr20	27400749	27401069	0.119132	10	4.3065e-06	8.18706e-05	intron (NM_001108533, intron 3 of 11)	-intron (NM_001108533, intron 3 of 11)	3082	NM_001108533	Spock2
chr20	27499057	27499428	-0.2256	12	4.7296e-14	2.58907e-11	Intergenic	Intergenic	-16253	NM_053408	Chst3
chr20	27889047	27889220	0.287662	13	7.3985e-13	2.1933e-10	intron (NM_053644, intron 6 of 66)	-intron (NM_053644, intron 6 of 66)	127011	NM_053644	Cdh23
chr20	28320314	28320545	0.24614	14	6.7096e-09	5.24317e-07	Intergenic	Intergenic	-128250	NM_001007601	Pcbd1
chr20	28733138	28733747	0.17053	19	4.7194e-07	1.57537e-05	Intergenic	Intergenic	-14761	NM_001034128	Pald1
chr20	29621920	29622241	-0.123588	10	0.00040313	0.00180524	Intergenic	Intergenic	-42872	NM_001033069	Eif4ebp2
chr20	31402763	31403570	0.100006	12	0.00012215	0.000800468	Intergenic	Intergenic	-218706	NM_001109338	Slc35f1
chr20	32327311	32327516	0.110532	10	5.8961e-05	0.000492368	Intergenic	Intergenic	65790	NM_001106389	Asf1a
chr20	36932644	36933048	0.197374	10	2.0832e-09	2.02114e-07	Intergenic	Intergenic	110930	NM_001005539	Smpdl3a
chr20	37106744	37107520	0.125174	10	0.0080236	0.0171948	Intergenic	Intergenic	-28402	NM_001191899	Edar
chr20	38287142	38287876	0.125955	10	0.00087505	0.00319915	Intergenic	Intergenic	-334779	NM_001013033	Tspyl1
chr20	39741806	39741855	-0.399176	10	3.7265e-09	3.24466e-07	Intergenic	Intergenic	859783	NM_024368	Frk
chr20	43486672	43486912	-0.222084	14	5.1868e-11	8.76663e-09	Intergenic	Intergenic	-15061	NM_012755	Fyn
chr20	43674893	43675254	-0.109668	10	0.015152	0.0281257	intron (NM_012755, intron 12 of 13)	-intron (NM_012755, intron 12 of 13)	-72548	NM_001044248	Traf3ip2
chr20	43791657	43791866	0.123677	15	0.0002706	0.0013562	intron (NM_001044248, intron 8 of 8)	-intron (NM_001044248, intron 8 of 8)	44140	NM_001044248	Traf3ip2
chr20	44171168	44171541	-0.102914	10	0.015357	0.0284327	intron (NM_176080, intron 1 of 3)	-intron (NM_176080, intron 1 of 3)	4953	NM_176080	Naglt1
chr20	44180589	44180894	0.245062	10	1.3613e-07	5.98924e-06	Intergenic	Intergenic	-4434	NM_176080	Naglt1
chr20	44787528	44787643	-0.129914	10	0.00097177	0.00344912	TTS (NM_001109465)	-TTS (NM_001109465)	20661	NM_001109465	Ddo
chr20	44938077	44938504	-0.197241	10	5.6303e-06	0.000100004	intron (NM_001025038, intron 4 of 4)	-intron (NM_001025038, intron 4 of 4)	36296	NM_001108538_1	Cdc40
chr20	44955754	44956139	-0.155713	10	1.6315e-05	0.000208347	intron (NM_001108538_1, intron 10 of 12)	-intron (NM_001108538_1, intron 10 of 12)	18640	NM_001108538_1	Cdc40
chr20	45220199	45220296	0.214491	18	8.5154e-14	3.49534e-11	intron (NM_001047096, intron 3 of 22)	-intron (NM_001047096, intron 3 of 22)	28547	NM_001047096	Fig4
chr20	45220673	45220840	0.112065	21	1.8072e-06	4.34951e-05	intron (NM_001047096, intron 3 of 22)	-intron (NM_001047096, intron 3 of 22)	28038	NM_001047096	Fig4
chr20	45912280	45912548	-0.136332	10	0.0037572	0.00963098	Intergenic	Intergenic	86121	NM_001047940	LOC499469
chr20	45912557	45912744	0.108091	10	0.021771	0.0375808	Intergenic	Intergenic	86358	NM_001047940	LOC499469
chr20	46190091	46190372	0.13161	10	0.00064154	0.00252726	intron (NM_001106395, intron 2 of 3)	-intron (NM_001106395, intron 2 of 3)	72586	NM_001106395	Foxo3
chr20	46250484	46250711	-0.138512	10	0.00037083	0.00170209	intron (NM_001106395, intron 2 of 3)	-intron (NM_001106395, intron 2 of 3)	12220	NM_001106395	Foxo3
chr20	46705399	46705488	0.184114	13	9.4976e-10	1.04342e-07	intron (NM_001107637, intron 7 of 19)	-intron (NM_001107637, intron 7 of 19)	36319	NM_001107637	Sec63
chr20	46705521	46705640	0.132943	14	9.8985e-06	0.000148609	intron (NM_001107637, intron 7 of 19)	-intron (NM_001107637, intron 7 of 19)	36456	NM_001107637	Sec63
chr20	46983649	46983846	-0.106177	10	0.0004261	0.00188379	intron (NM_001104640, intron 4 of 7)	-intron (NM_001104640, intron 4 of 7)	96075	NM_001104640	Sobp
chr20	46994512	46994607	0.121097	15	3.5703e-06	7.13926e-05	intron (NM_001104640, intron 4 of 7)	-intron (NM_001104640, intron 4 of 7)	85263	NM_001104640	Sobp
chr20	46995193	46995555	-0.133939	10	0.00021208	0.00115703	intron (NM_001104640, intron 4 of 7)	-intron (NM_001104640, intron 4 of 7)	84449	NM_001104640	Sobp
chr20	47315093	47315176	0.110728	11	0.013591	0.0259255	intron (NM_001014249, intron 2 of 3)	-intron (NM_001014249, intron 2 of 3)	186785	NM_001014249	Pdss2
chr20	47330726	47330872	-0.166234	12	9.3231e-07	2.65548e-05	intron (NM_001014249, intron 3 of 3)	-intron (NM_001014249, intron 3 of 3)	-171555	NM_012752	Cd24
chr20	47804199	47804339	0.677714	10	4.3299e-14	2.58907e-11	exon (NM_001014034, exon 5 of 11)	-exon (NM_001014034, exon 5 of 11)	14082	NM_001014034	Qrsl1
chr20	48412393	48412722	0.196859	10	7.2459e-05	0.000560945	Intergenic	Intergenic	47290	NM_001107639	Prdm1
chr20	48477934	48478430	-0.163211	10	3.8365e-05	0.000368203	Intergenic	Intergenic	-18334	NM_001107639	Prdm1
chr20	49062916	49063518	-0.100274	10	0.0045224	0.0110887	intron (NM_031324, intron 6 of 14)	-intron (NM_031324, intron 6 of 14)	38300	NM_031324	Prep
chr20	54735023	54735368	0.138145	10	0.00089835	0.00326389	intron (NM_001277057, intron 22 of 42)	-intron (NM_001277057, intron 22 of 42)	153543	NM_001277057	Ascc3
chr3	551748	552146	0.100195	12	0.0042871	0.0106452	Intergenic	Intergenic	727990	NM_001024308	LOC499742
chr3	555815	555977	0.117194	23	0.00011692	0.000776273	Intergenic	Intergenic	724041	NM_001024308	LOC499742
chr3	556176	556252	-0.147781	10	1.2907e-07	5.74631e-06	Intergenic	Intergenic	723723	NM_001024308	LOC499742
chr3	802300	802956	0.187345	13	2.4095e-06	5.33188e-05	Intergenic	Intergenic	477309	NM_001024308	LOC499742
chr3	2667758	2667904	-0.114825	10	2.5267e-05	0.000277099	Intergenic	Intergenic	44913	NM_001134881	Psd4
chr3	3007707	3008484	0.181311	14	0.00028216	0.00139376	intron (NM_001195199, intron 6 of 46)	-intron (NM_147141, intron 6 of 45)	31569	NM_001195199	Cacna1b
chr3	3308338	3308607	-0.200445	10	1.2802e-06	3.33236e-05	Intergenic	Intergenic	-33452	NM_001143750	Nrarp
chr3	3539113	3539615	0.109362	14	0.0029085	0.00792076	intron (NM_001109418, intron 1 of 5)	-intron (NM_001109418, intron 1 of 5)	887	NM_001109418	Sapcd2
chr3	3602045	3603135	-0.169248	10	0.0017482	0.00537807	exon (NM_024396, exon 9 of 48)	-exon (NM_024396, exon 9 of 48)	7167	NM_024396	Abca2
chr3	3612290	3612530	-0.111103	11	1.9866e-05	0.000237405	exon (NM_024396, exon 40 of 48)	-exon (NM_024396, exon 40 of 48)	-10484	NM_001013080	Clic3
chr3	3671099	3671188	-0.11975	11	0.0099969	0.0204723	TTS (NM_001106555)	-TTS (NM_001106555)	-2774	NM_001025730	Fbxw5
chr3	3748695	3748780	0.124339	10	3.2014e-05	0.000327981	Intergenic	Intergenic	-2392	NM_001106558	Phpt1
chr3	3900971	3901270	0.107481	10	0.025371	0.0426155	Intergenic	Intergenic	-14495	NM_001135809	Lcn11
chr3	3995551	3995932	-0.111446	10	0.022772	0.0389256	promoter-TSS (NM_001106560)	-promoter-TSS (NM_001106560)	-754	NM_001106560	Lcn9
chr3	4114187	4114270	0.122257	10	2.8451e-05	0.000302686	intron (NM_001168549, intron 9 of 17)	-intron (NM_001168549, intron 9 of 17)	45362	NM_001168549	Camsap1
chr3	4220525	4220672	0.126485	10	0.010745	0.0215714	Intergenic	Intergenic	-19053	NM_001007742	Ubac1
chr3	4247618	4248029	-0.117857	10	0.00044617	0.0019499	intron (NM_001100533, intron 2 of 5)	-intron (NM_001100533, intron 2 of 5)	-46278	NM_001007742	Ubac1
chr3	4319482	4319617	-0.125572	13	2.1804e-05	0.000253169	exon (NM_001126295, exon 2 of 2)	-exon (NM_001126295, exon 2 of 2)	1746	NM_001126295	RGD1564379
chr3	4339843	4340145	-0.157525	10	0.0010598	0.00368626	Intergenic	Intergenic	-18698	NM_001126295	RGD1564379
chr3	4827042	4827258	-0.155498	10	1.5609e-05	0.000201885	Intergenic	Intergenic	17862	NM_001014178	Fam69b
chr3	5895564	5895893	0.170736	12	0.00016374	0.000980314	Intergenic	Intergenic	-9749	NM_001106561	Cacfd1
chr3	5997611	5997764	0.16047	10	8.108e-05	0.000605353	Intergenic	Intergenic	-30759	NM_001134517	Tmem8c
chr3	6096903	6097229	0.14145	10	0.00085982	0.00315552	intron (NM_053664, intron 15 of 18)	-intron (NM_053664, intron 15 of 18)	44360	NM_013158	Dbh
chr3	6217480	6217839	-0.162911	11	2.8939e-05	0.000306705	intron (NM_001106563, intron 3 of 27)	-intron (NM_001106563, intron 3 of 27)	-75095	NM_053664	Sardh
chr3	6288850	6289185	-0.103045	10	0.00047142	0.00202193	intron (NM_001106563, intron 1 of 27)	-intron (NM_001106563, intron 1 of 27)	58658	NM_001106563	Vav2
chr3	6420915	6421565	-0.102161	21	0.007845	0.0169066	Intergenic	Intergenic	-11639	NM_001039034	Wdr5
chr3	6971117	6971299	0.17455	10	0.00037779	0.00172366	TTS (NM_134452)	-TTS (NM_134452)	48158	NM_053634	Fcnb
chr3	7071640	7072188	0.115075	10	0.023213	0.0395527	Intergenic	Intergenic	-52548	NM_053634	Fcnb
chr3	7204033	7204366	0.216319	10	0.00010978	0.000740319	Intergenic	Intergenic	33779	NM_053573	Olfm1
chr3	7268611	7269029	-0.159323	11	0.00011256	0.000756197	Intergenic	Intergenic	98399	NM_053573	Olfm1
chr3	7915074	7915713	0.105791	10	0.0031363	0.00839726	Intergenic	Intergenic	9770	NM_057109	Barhl1
chr3	7950187	7950301	-0.157854	10	7.3959e-05	0.00056902	intron (NM_001127563, intron 5 of 5)	-intron (NM_001127563, intron 5 of 5)	-25080	NM_057109	Barhl1
chr3	7954535	7954672	0.171726	10	2.8136e-06	5.98499e-05	intron (NM_001127563, intron 5 of 5)	-intron (NM_001127563, intron 5 of 5)	-29440	NM_057109	Barhl1
chr3	8833968	8834132	-0.117157	12	0.00022986	0.0012229	promoter-TSS (NR_031933)	-promoter-TSS (NR_031933)	-50	NR_031933	Mir219-2
chr3	8846211	8846539	-0.103758	10	0.0036703	0.00946017	Intergenic	Intergenic	-8399	NM_001011962	Cercam
chr3	8913823	8914571	-0.170358	10	9.8295e-05	0.0006886	Intergenic	Intergenic	-10586	NM_001025731	Gle1
chr3	9305486	9305836	0.152507	10	0.00022468	0.00120288	exon (NM_001024782, exon 4 of 4)	-exon (NM_001024782, exon 4 of 4)	-4852	NM_001013081	Phyhd1
chr3	9552820	9554082	0.116779	18	0.00016391	0.000981175	Intergenic	Intergenic	-35913	NM_001025041	Ier5l
chr3	9594834	9595011	0.104288	17	2.0293e-06	4.71983e-05	Intergenic	Intergenic	-77385	NM_001025041	Ier5l
chr3	10196727	10197303	-0.162512	10	1.1947e-05	0.000168018	intron (NM_138914, intron 1 of 15)	-intron (NM_138914, intron 1 of 15)	5184	NM_138914	Fnbp1
chr3	10368725	10368858	0.279787	10	1.8707e-07	7.57877e-06	Intergenic	Intergenic	63590	NM_024366	Ncs1
chr3	10434639	10435116	0.196859	10	3.9267e-07	1.35935e-05	Intergenic	Intergenic	129676	NM_024366	Ncs1
chr3	10558060	10558690	-0.145409	15	7.9657e-05	0.000597356	Intergenic	Intergenic	-22406	NM_013157	Ass1
chr3	10591986	10592435	0.12857	10	0.00026181	0.00132458	intron (NM_013157, intron 5 of 13)	-intron (NM_013157, intron 5 of 13)	11430	NM_013157	Ass1
chr3	10597439	10597739	-0.113973	15	3.1889e-12	7.78529e-10	intron (NM_013157, intron 7 of 13)	-intron (NM_013157, intron 7 of 13)	16808	NM_013157	Ass1
chr3	10762478	10763167	0.232409	10	9.8753e-07	2.76516e-05	Intergenic	Intergenic	-24162	NM_001108952	Exosc2
chr3	10856411	10856450	-0.17851	10	3.3974e-08	1.95236e-06	intron (NM_001100850, intron 1 of 10)	-intron (NM_001100850, intron 1 of 10)	52525	NM_001100850	Abl1
chr3	10856639	10856802	-0.130492	12	4.6914e-05	0.000419832	intron (NM_001100850, intron 1 of 10)	-intron (NM_001100850, intron 1 of 10)	52815	NM_001100850	Abl1
chr3	10912144	10912338	0.110069	10	0.00053077	0.00220581	TTS (NM_198200)	-TTS (NM_198200)	274	NM_198200	Qrfp
chr3	10942942	10943224	-0.109899	11	0.0024687	0.00699434	exon (NM_001107829, exon 2 of 7)	-exon (NM_001107829, exon 2 of 7)	7406	NM_001107829	Fibcd1
chr3	11266479	11266694	-0.155721	10	0.01252	0.0242575	Intergenic	Intergenic	56989	NM_001012349	Ppapdc3
chr3	11292550	11292787	0.142041	10	6.4046e-05	0.00051804	Intergenic	Intergenic	-56117	NM_053406	Pomt1
chr3	11324605	11324837	-0.172261	13	2.1266e-08	1.33729e-06	Intergenic	Intergenic	-24065	NM_053406	Pomt1
chr3	11326636	11326785	-0.138691	11	1.0125e-06	2.80355e-05	Intergenic	Intergenic	-22075	NM_053406	Pomt1
chr3	11326793	11327367	-0.106603	29	3.1514e-12	7.78529e-10	Intergenic	Intergenic	-21706	NM_053406	Pomt1
chr3	11332889	11333186	0.101769	13	6.5497e-06	0.000110702	Intergenic	Intergenic	-15748	NM_053406	Pomt1
chr3	11473744	11473914	-0.139849	10	0.00012253	0.000800991	intron (NM_080689, intron 1 of 21)	-intron (NM_080689, intron 1 of 21)	4623	NM_080689	Dnm1
chr3	11718416	11718536	-0.108995	12	1.2118e-05	0.000169657	intron (NM_001108579, intron 3 of 11)	-intron (NM_001108579, intron 3 of 11)	-15474	NM_001007744	Tor2a
chr3	11940044	11940392	0.134342	10	0.0019956	0.00596095	exon (NM_001107833, exon 10 of 26)	-exon (NM_001107833, exon 10 of 26)	11588	NM_001107833	Lrsam1
chr3	12341114	12341563	0.104665	10	0.00030752	0.00147835	Intergenic	Intergenic	114824	NM_133569	Angptl2
chr3	12816171	12816427	-0.12048	10	1.0507e-06	2.86892e-05	intron (NM_001271232, intron 7 of 9)	-intron (NM_001271232, intron 7 of 9)	89362	NM_001271232	Mvb12b
chr3	12831985	12832171	0.102907	10	0.0044879	0.0110251	intron (NM_001271232, intron 6 of 9)	-intron (NM_001271232, intron 6 of 9)	73583	NM_001271232	Mvb12b
chr3	12993676	12993867	-0.135664	10	1.2635e-05	0.000175196	Intergenic	Intergenic	-88111	NM_001271232	Mvb12b
chr3	14302131	14302249	-0.101744	24	0.00014355	0.000898625	Intergenic	Intergenic	-46206	NM_053589	Rab14
chr3	14422715	14422872	0.159753	10	2.2669e-05	0.000258648	Intergenic	Intergenic	-7506	NM_001011965	Stom
chr3	17527933	17528101	0.14506	10	0.0018072	0.00551912	Intergenic	Intergenic	-11271	NM_001135761	Crb2
chr3	17538919	17539127	-0.122355	10	0.0075161	0.016374	promoter-TSS (NM_001135761)	-promoter-TSS (NM_001135761)	-265	NM_001135761	Crb2
chr3	18323851	18324459	-0.135359	18	0.0004859	0.00207072	intron (NM_001277232, intron 1 of 9)	-intron (NM_001277232, intron 1 of 9)	621	NM_001277232	Nek6
chr3	18477832	18478025	-0.111262	12	0.0023488	0.00674864	Intergenic	Intergenic	-26721	NM_053532	Psmb7
chr3	31957175	31957645	-0.10269	10	0.004092	0.0102689	Intergenic	Intergenic	161375	NM_001007641	Rnd3
chr3	34188357	34188564	0.133272	10	2.1941e-05	0.000254443	Intergenic	Intergenic	70914	NM_001012085	Stam2
chr3	38869963	38870209	0.133787	13	1.5363e-08	1.03771e-06	intron (NM_019328, intron 2 of 6)	-intron (NM_019328, intron 2 of 6)	1592	NM_019328	Nr4a2
chr3	41518730	41518891	-0.107009	10	0.00072052	0.00275613	intron (NM_001002854, intron 12 of 25)	-intron (NM_001002854, intron 12 of 25)	84106	NM_001014179	Wdsub1
chr3	41542927	41543501	0.16554	13	5.584e-10	6.77205e-08	intron (NM_001002854, intron 18 of 25)	-intron (NM_001002854, intron 18 of 25)	59703	NM_001014179	Wdsub1
chr3	41562507	41562790	0.317198	12	4.8406e-14	2.58907e-11	exon (NM_001002854, exon 26 of 26)	-exon (NM_001002854, exon 26 of 26)	40268	NM_001014179	Wdsub1
chr3	41562808	41563208	0.122863	10	1.5609e-05	0.000201885	exon (NM_001002854, exon 26 of 26)	-exon (NM_001002854, exon 26 of 26)	39909	NM_001014179	Wdsub1
chr3	42485358	42485726	0.129185	10	0.0020121	0.00599968	intron (NM_001012184, intron 2 of 13)	-intron (NM_001012184, intron 2 of 13)	-124749	NM_001004263	Itgb6
chr3	43484235	43484549	-0.104179	10	0.0098041	0.0201437	Intergenic	Intergenic	73798	NM_145788	Tank
chr3	44526069	44526969	0.116726	13	0.0010915	0.00376879	promoter-TSS (NM_138850)	-promoter-TSS (NM_138850)	-917	NM_138850	Fap
chr3	51815596	51815885	-0.125345	12	0.00034661	0.00161594	promoter-TSS (NM_057191)	-promoter-TSS (NM_057191)	-275	NM_057191	Klhl41
chr3	54458601	54459046	0.115052	12	0.00031818	0.00151478	Intergenic	Intergenic	166748	NM_053826	Pdk1
chr3	54665036	54665650	0.123525	15	2.6335e-06	5.69595e-05	Intergenic	Intergenic	-283150	NM_001025693	Cdca7
chr3	54951904	54952478	-0.111748	10	0.0047346	0.0114951	intron (NM_001025693, intron 2 of 8)	-intron (NM_001025693, intron 2 of 8)	3698	NM_001025693	Cdca7
chr3	55324618	55324897	0.189201	10	4.4477e-05	0.000406099	Intergenic	Intergenic	376265	NM_001025693	Cdca7
chr3	55544962	55545395	0.104885	15	3.1381e-06	6.47968e-05	Intergenic	Intergenic	170389	NM_001033927	Ola1
chr3	55675531	55675782	-0.110009	10	0.0031612	0.00844879	intron (NM_001033927, intron 4 of 10)	-intron (NM_001033927, intron 4 of 10)	39911	NM_001033927	Ola1
chr3	55857690	55857966	0.125621	11	0.0087277	0.0183397	exon (NM_001107811, exon 12 of 16)	-exon (NM_001107811, exon 12 of 16)	39024	NM_001013162	Scrn3
chr3	55952554	55952702	-0.10769	10	0.014257	0.0269287	exon (NM_057192, exon 5 of 8)	-exon (NM_057192, exon 5 of 8)	50682	NM_057192	Wipf1
chr3	57123367	57123584	-0.106113	12	0.030285	0.0492956	Intergenic	Intergenic	75342	NM_001077429	Lnp
chr3	57129396	57129515	0.143832	10	9.9987e-07	2.78095e-05	Intergenic	Intergenic	69362	NM_001077429	Lnp
chr3	57342598	57342954	-0.208841	10	2.0102e-06	4.68415e-05	intron (NM_001105885, intron 5 of 5)	-intron (NM_001105885, intron 5 of 5)	1923	NR_031815	Mir10b
chr3	57349485	57349784	0.124568	12	0.0001176	0.000779915	Intergenic	Intergenic	-1485	NM_001271038	Hoxd3
chr3	57350775	57350972	-0.102643	10	0.0039981	0.0100899	promoter-TSS (NM_001271038)	-promoter-TSS (NM_001271038)	-246	NM_001271038	Hoxd3
chr3	57361707	57361828	-0.101159	10	3.8291e-06	7.50411e-05	exon (NM_001271038, exon 3 of 3)	-exon (NM_001271038, exon 3 of 3)	10648	NM_001271038	Hoxd3
chr3	57656084	57656560	0.142555	10	0.00069531	0.0026836	Intergenic	Intergenic	195422	NM_001008286	Mtx2
chr3	57912350	57912809	0.113623	16	0.013602	0.0259381	Intergenic	Intergenic	-439441	NM_001111294	Hnrnpa3
chr3	61085710	61086136	0.100897	10	0.00050717	0.00213337	Intergenic	Intergenic	-317928	NM_001126290	RGD1564319
chr3	62748386	62748893	-0.12373	10	0.00015383	0.000935071	intron (NM_030871, intron 2 of 14)	-intron (NM_030871, intron 2 of 14)	179847	NM_030871	Pde1a
chr3	63204878	63204959	0.220212	10	4.7962e-14	2.58907e-11	intron (NM_031618, intron 27 of 28)	-intron (NM_031618, intron 27 of 28)	59903	NM_001106486	Dnajc10
chr3	67645735	67646397	0.106814	11	0.0032566	0.0086573	intron (NM_012717, intron 1 of 15)	-intron (NM_012717, intron 1 of 15)	811	NM_012717	Calcrl
chr3	67868445	67868542	-0.19898	12	4.7629e-14	2.58907e-11	Intergenic	Intergenic	-8207	NM_001107740	Ctnnd1
chr3	68287475	68287806	0.111297	12	0.0054674	0.012788	Intergenic	Intergenic	14694	NM_031121	Ssrp1
chr3	74900756	74900997	0.134951	10	0.0070894	0.0157301	intron (NM_017269, intron 1 of 19)	-intron (NM_017269, intron 1 of 19)	34733	NM_017269	Ptprj
chr3	74904472	74904868	-0.125959	10	0.00051181	0.00214684	intron (NM_017269, intron 1 of 19)	-intron (NM_017269, intron 1 of 19)	30940	NM_017269	Ptprj
chr3	75553722	75554509	0.153668	10	0.0015164	0.00482882	Intergenic	Intergenic	-3323	NM_031627	Nr1h3
chr3	75777169	75777562	-0.110014	12	0.00060591	0.00243912	intron (NM_001013918, intron 2 of 8)	-intron (NM_001013918, intron 2 of 8)	28891	NM_001013918	RGD1309540
chr3	78061326	78061446	0.100101	11	1.303e-05	0.000178892	intron (NM_001106553, intron 1 of 3)	-intron (NM_001106553, intron 1 of 3)	3670	NM_001106553	Alx4
chr3	78084809	78085134	-0.100823	10	0.00021413	0.00116476	intron (NM_001106553, intron 2 of 3)	-intron (NM_001106553, intron 2 of 3)	27256	NM_001106553	Alx4
chr3	87187755	87188129	-0.169921	12	1.2645e-05	0.000175196	Intergenic	Intergenic	146741	NM_001033692	Commd9
chr3	89160177	89160280	-0.138155	10	9.4407e-05	0.000668509	Intergenic	Intergenic	-67136	NM_001012185	Caprin1
chr3	89571438	89571941	-0.142621	12	0.0003092	0.00148585	Intergenic	Intergenic	-92040	NM_001109606	Fbxo3
chr3	90202060	90202238	-0.154813	12	1.0844e-06	2.92936e-05	Intergenic	Intergenic	-3495	NM_001109203	Prrg4
chr3	91639221	91639830	-0.135182	11	0.0031469	0.00842081	Intergenic	Intergenic	-76883	NM_001114621	Dcdc5
chr3	93841634	93841763	-0.248447	10	2.8803e-07	1.06734e-05	Intergenic	Intergenic	981408	NM_001024981	Mettl15
chr3	99560974	99561116	0.206506	10	5.8972e-06	0.000102934	exon (NM_001135238, exon 1 of 4)	-exon (NM_001135238, exon 1 of 4)	134	NM_001135238	Twf2
chr3	105199219	105199344	-0.254139	12	6.0944e-05	0.000502748	Intergenic	Intergenic	24060	NM_053478	Plcb2
chr3	105781339	105781662	0.204104	10	2.3291e-08	1.4309e-06	Intergenic	Intergenic	14268	NM_138542	Rhov
chr3	106265348	106265573	-0.134433	10	0.00045029	0.00196125	TTS (NM_001107763)	-TTS (NM_001107763)	7661	NM_001107763	Ltk
chr3	106988941	106989392	0.168863	10	9.3457e-05	0.000665313	intron (NM_017117, intron 13 of 23)	-intron (NM_017117, intron 13 of 23)	42286	NM_017117	Capn3
chr3	109606184	109606361	-0.186473	10	5.1309e-06	9.37186e-05	Intergenic	Intergenic	-3625	NM_001008518	MGC105649
chr3	113121389	113121734	-0.123951	10	0.0036418	0.00939968	Intergenic	Intergenic	-29134	NM_001168527	Secisbp2l
chr3	113468565	113468953	-0.11374	14	9.5659e-06	0.000145014	exon (NM_022182, exon 1 of 3)	-exon (NM_022182, exon 1 of 3)	332	NM_022182	Fgf7
chr3	115466679	115467158	0.14155	11	1.8236e-05	0.000224957	intron (NM_001106508, intron 11 of 19)	-intron (NM_001106508, intron 11 of 19)	101640	NM_001106508	Acoxl
chr3	115688667	115688888	-0.134459	10	0.0027172	0.00751708	promoter-TSS (NM_171988)	-promoter-TSS (NM_171988)	-885	NM_171988	Bcl2l11
chr3	115720835	115721096	-0.120675	10	0.00020209	0.00111882	intron (NM_171989, intron 2 of 2)	-intron (NM_022612, intron 3 of 3)	28643	NM_171989	Bcl2l11
chr3	115832993	115833804	-0.209688	11	2.4675e-08	1.50112e-06	Intergenic	Intergenic	141076	NM_171989	Bcl2l11
chr3	116018087	116018482	-0.291919	10	3.8512e-10	5.02986e-08	Intergenic	Intergenic	137439	NR_110721	LOC102550367
chr3	116173922	116174001	-0.173185	10	0.0014911	0.00476287	Intergenic	Intergenic	-18238	NR_110721	LOC102550367
chr3	116348490	116348730	0.159936	11	0.0014744	0.00474238	intron (NM_022943, intron 4 of 18)	-intron (NM_022943, intron 4 of 18)	40223	NM_022943	Mertk
chr3	116575834	116575952	0.115912	12	0.0033029	0.0087536	exon (NM_001107772, exon 1 of 12)	-exon (NM_001107772, exon 1 of 12)	249	NM_001107772	Zc3h6
chr3	116890017	116890096	-0.10946	12	1.692e-13	6.01917e-11	Intergenic	Intergenic	34057	NM_017019	Il1a
chr3	117555580	117555839	0.140093	10	0.00065902	0.00257736	Intergenic	Intergenic	-67017	NM_001108959	Tgm3
chr3	118266171	118266337	0.122885	10	0.00060243	0.00242668	exon (NM_172022, exon 3 of 5)	-exon (NM_172022, exon 3 of 5)	2109	NM_172022	Lzts3
chr3	118849981	118850058	-0.151995	12	0.0011447	0.00389868	exon (NM_001107778, exon 13 of 13)	-exon (NM_001107778, exon 13 of 13)	15491	NM_001025691	RGD1311739
chr3	119167539	119167667	-0.102672	15	2.3262e-06	5.20614e-05	Intergenic	Intergenic	-72773	NM_001134854	Smox
chr3	120064212	120064886	0.129837	10	0.0026103	0.00728011	TTS (NM_053643)	-TTS (NM_053643)	39094	NM_053643	Cds2
chr3	121373365	121373733	-0.103713	10	0.0037866	0.00968906	intron (NM_017178, intron 1 of 3)	-intron (NM_017178, intron 1 of 3)	857	NM_017178	Bmp2
chr3	130266847	130266918	-0.175613	15	7.5042e-10	8.52999e-08	Intergenic	Intergenic	983519	NM_001107783	Kif16b
chr3	134672152	134672574	0.14316	10	5.7623e-06	0.00010148	Intergenic	Intergenic	-117693	NM_053797	Crnkl1
chr3	135467743	135467897	-0.155558	10	0.00019068	0.00107558	Intergenic	Intergenic	-183239	NM_001108596	Xrn2
chr3	135835087	135835396	0.101548	11	0.0041272	0.0103361	Intergenic	Intergenic	4721	NM_001191904	Nkx2-2
chr3	135837206	135837549	0.190808	10	5.2017e-07	1.68956e-05	TTS (NM_001191904)	-TTS (NM_001191904)	2585	NM_001191904	Nkx2-2
chr3	136110712	136110929	-0.120581	10	6.6058e-05	0.000527913	Intergenic	Intergenic	104317	NM_001107787	Pax1
chr3	139121919	139122339	-0.144074	10	0.007571	0.01646	Intergenic	Intergenic	154695	NM_001108961	Cst5
chr3	140990309	140990426	0.169812	10	0.00029613	0.00143785	Intergenic	Intergenic	-198074	NM_001106523	Cst7
chr3	142011428	142011625	0.112695	10	0.0079082	0.0170021	Intergenic	Intergenic	-49830	NM_001106525	Snph
chr3	142011673	142011989	0.234753	13	1.4383e-05	0.000191192	Intergenic	Intergenic	-50134	NM_001106525	Snph
chr3	143137599	143137960	-0.2077	10	2.7702e-07	1.03683e-05	intron (NM_001033671, intron 1 of 1)	-intron (NM_001033671, intron 1 of 1)	34432	NM_053472	Cox4i2
chr3	143575516	143575866	0.148132	10	0.010745	0.0215714	exon (NM_001106527, exon 1 of 1)	-exon (NM_001106527, exon 1 of 1)	593	NM_001106527	Tspy26
chr3	145310203	145310724	-0.240826	17	4.8242e-10	5.96683e-08	intron (NM_001011958, intron 2 of 6)	-intron (NM_001011958, intron 2 of 6)	34632	NM_001011958	Raly
chr3	145881891	145882094	0.139025	10	0.00083744	0.00308947	intron (NM_001270947, intron 2 of 3)	-intron (NM_001270947, intron 2 of 3)	-2752	NR_106708	Mir6334
chr3	146303868	146304300	0.178609	10	6.8506e-06	0.00011439	Intergenic	Intergenic	35517	NM_001025733	Procr
chr3	146400288	146400571	0.180617	10	6.8506e-06	0.00011439	Intergenic	Intergenic	-16169	NM_001106533	Ergic3
chr3	146934497	146934780	-0.190097	10	2.7547e-05	0.000295255	intron (NM_172090, intron 18 of 21)	-intron (NM_172090, intron 18 of 21)	-27963	NM_001106535	Aar2
chr3	147641582	147641916	-0.135048	11	0.0084601	0.0178847	Intergenic	Intergenic	-54781	NM_001025768	Dsn1
chr3	148146566	148146893	0.158336	10	0.00070781	0.00272004	Intergenic	Intergenic	-10526	NM_031977	Src
chr3	148165360	148165629	-0.147521	16	1.9059e-07	7.68802e-06	intron (NM_031977, intron 6 of 11)	-intron (NM_031977, intron 6 of 11)	8239	NM_031977	Src
chr3	148167648	148168303	-0.139428	12	0.0058547	0.0134778	intron (NM_031977, intron 8 of 11)	-intron (NM_031977, intron 8 of 11)	10720	NM_031977	Src
chr3	148384718	148384839	-0.340877	21	4.2077e-14	2.58907e-11	Intergenic	Intergenic	-55978	NM_001024870	Ctnnbl1
chr3	148832075	148832193	-0.329107	10	3.1691e-11	5.77441e-09	TTS (NM_019386)	-TTS (NM_019386)	30251	NM_019386	Tgm2
chr3	148892971	148893399	-0.128382	12	0.027689	0.0458655	Intergenic	Intergenic	-30800	NM_019386	Tgm2
chr3	148982275	148982621	-0.250934	10	9.4293e-06	0.00014361	intron (NM_001004079, intron 7 of 14)	-intron (NM_001004079, intron 7 of 14)	11483	NM_001004079	Bpi
chr3	149416588	149416779	0.241302	10	1.5609e-05	0.000201885	intron (NM_001191072, intron 1 of 10)	-intron (NM_001191072, intron 1 of 10)	12022	NM_001191072	Ppp1r16b
chr3	151410020	151410238	0.115923	10	2.9069e-05	0.000306987	Intergenic	Intergenic	-18802	NM_022615	Top1
chr3	152228610	152228981	0.104895	10	0.0032116	0.008559	Intergenic	Intergenic	-304128	NM_001107797	Chd6
chr3	152862809	152862992	-0.214728	10	5.2855e-08	2.80508e-06	intron (NM_001108603, intron 4 of 25)	-intron (NM_001108603, intron 4 of 25)	309175	NM_001108603	Ptprt
chr3	153838672	153838861	-0.189547	10	2.8146e-05	0.000300296	Intergenic	Intergenic	-11058	NM_134463	Sgk2
chr3	154267978	154268045	0.152133	10	2.3512e-06	5.24346e-05	exon (NM_001037974, exon 2 of 5)	-exon (NM_001037974, exon 2 of 5)	21244	NM_001037974	Jph2
chr3	154941631	154941808	-0.168738	10	2.1004e-05	0.000246408	exon (NM_019377, exon 2 of 6)	-exon (NM_019377, exon 2 of 6)	15695	NM_019377	Ywhab
chr3	155163555	155163779	0.217625	14	1.1711e-10	1.83799e-08	Intergenic	Intergenic	-3429	NM_001009179	Wfdc15b
chr3	155436526	155436972	-0.105816	10	0.00031931	0.00151842	exon (NM_001108604, exon 12 of 12)	-exon (NM_001108604, exon 12 of 12)	-10143	NM_001106539	Matn4
chr3	155987950	155988279	0.12088	10	0.014848	0.0276824	intron (NM_031055, intron 6 of 12)	-intron (NM_031055, intron 6 of 12)	2642	NM_031055	Mmp9
chr3	156931947	156932076	0.151368	11	1.8411e-05	0.000226218	intron (NM_001100838, intron 2 of 21)	-intron (NM_001100838, intron 2 of 21)	25736	NM_001100838	Zmynd8
chr3	156932188	156932305	-0.10904	10	0.022627	0.0387309	intron (NM_001100838, intron 2 of 21)	-intron (NM_001100838, intron 2 of 21)	25501	NM_001100838	Zmynd8
chr3	156954417	156954880	-0.163581	10	0.0024274	0.00691351	intron (NM_001100838, intron 1 of 21)	-intron (NM_001100838, intron 1 of 21)	3099	NM_001100838	Zmynd8
chr3	156971895	156972703	-0.122037	22	6.7608e-06	0.000113288	Intergenic	Intergenic	-14551	NM_001100838	Zmynd8
chr3	157721352	157721485	0.282783	10	0.00017988	0.00103466	exon (NM_001135718, exon 16 of 40)	-exon (NM_001135718, exon 16 of 40)	142524	NM_001135718	Prex1
chr3	157738095	157738503	-0.163923	10	0.0039366	0.00997507	intron (NM_001135718, intron 10 of 39)	-intron (NM_001135718, intron 10 of 39)	125644	NM_001135718	Prex1
chr3	157762520	157762896	-0.239725	13	0.00017982	0.00103466	intron (NM_001135718, intron 7 of 39)	-intron (NM_001135718, intron 7 of 39)	101235	NM_001135718	Prex1
chr3	157815576	157816017	0.130493	11	0.0034865	0.00910453	intron (NM_001135718, intron 1 of 39)	-intron (NM_001135718, intron 1 of 39)	48146	NM_001135718	Prex1
chr3	157825992	157826180	-0.164001	11	0.0016091	0.00505421	intron (NM_001135718, intron 1 of 39)	-intron (NM_001135718, intron 1 of 39)	37857	NM_001135718	Prex1
chr3	158340972	158341260	0.183381	10	0.00010337	0.000713316	intron (NM_013186, intron 1 of 25)	-intron (NM_013186, intron 1 of 25)	1307	NM_013186	Kcnb1
chr3	158342209	158342349	0.115732	19	3.8046e-07	1.32816e-05	exon (NM_013186, exon 1 of 26)	-exon (NM_013186, exon 1 of 26)	144	NM_013186	Kcnb1
chr3	158423523	158424172	-0.108511	11	0.007093	0.0157349	Intergenic	Intergenic	25573	NM_001108608	B4galt5
chr3	158677788	158678173	0.112733	15	4.4187e-14	2.58907e-11	intron (NM_053805, intron 2 of 2)	-intron (NM_053805, intron 2 of 2)	1001	NM_053805	Snai1
chr3	158786862	158787628	-0.173404	12	2.907e-08	1.71541e-06	intron (NM_001113752, intron 1 of 4)	-intron (NM_001113752, intron 1 of 4)	3009	NM_001113752	Tmem189
chr3	158899925	158900440	0.253367	10	1.3796e-07	6.04129e-06	Intergenic	Intergenic	73766	NM_001301715	Cebpb
chr3	158903817	158904065	0.105243	10	0.0035296	0.0091869	Intergenic	Intergenic	77524	NM_001301715	Cebpb
chr3	158913571	158913917	-0.245869	14	3.0301e-11	5.57553e-09	Intergenic	Intergenic	87327	NM_001301715	Cebpb
chr3	159245153	159245655	-0.241874	10	4.045e-05	0.00038174	intron (NM_001108609, intron 2 of 2)	-intron (NM_001108609, intron 2 of 2)	14731	NM_001108609	Pard6b
chr3	159248966	159249217	-0.285362	10	2.2645e-08	1.39351e-06	exon (NM_001108609, exon 3 of 3)	-exon (NM_001108609, exon 3 of 3)	18419	NM_001108609	Pard6b
chr3	159394525	159394615	-0.100808	10	0.0040292	0.0101513	exon (NM_001107804, exon 1 of 1)	-exon (NM_001107804, exon 1 of 1)	925	NM_001107804	Mocs3
chr3	159514556	159514848	-0.144759	10	0.00059703	0.00241247	Intergenic	Intergenic	-67468	NM_001106545	Kcng1
chr3	159680644	159681007	-0.215931	12	1.9324e-06	4.55113e-05	exon (NM_001107805, exon 9 of 10)	-exon (NM_001107805, exon 9 of 10)	92817	NM_001107805	Nfatc2
chr3	159694012	159694383	0.107754	10	0.00026181	0.00132458	intron (NM_001107805, intron 6 of 9)	-intron (NM_001107805, intron 6 of 9)	79445	NM_001107805	Nfatc2
chr3	160138037	160138243	0.113345	10	0.0099439	0.0203727	Intergenic	Intergenic	-93500	NM_001012093	Zfp64
chr3	160475382	160475451	-0.136527	10	0.00013666	0.000866813	Intergenic	Intergenic	-430777	NM_001012093	Zfp64
chr3	160513640	160513836	0.141479	11	0.00080444	0.00299584	Intergenic	Intergenic	-469098	NM_001012093	Zfp64
chr3	160906488	160906578	-0.123209	10	9.4407e-05	0.000668509	Intergenic	Intergenic	254645	NM_001107813	Zfp217
chr3	161116199	161116316	-0.147896	13	1.7857e-07	7.33787e-06	Intergenic	Intergenic	44920	NM_001107813	Zfp217
chr3	161149675	161150195	0.215815	11	3.9535e-06	7.69943e-05	TTS (NM_001107813)	-TTS (NM_001107813)	11243	NM_001107813	Zfp217
chr3	161358924	161359081	-0.129463	10	1.2355e-05	0.000172264	Intergenic	Intergenic	116652	NM_145670	Bcas1
chr3	162502555	162503045	-0.128566	10	8.5132e-06	0.000133769	Intergenic	Intergenic	418842	NM_001109210	Cbln4
chr3	162558962	162559255	-0.13684	10	0.00013398	0.000853583	Intergenic	Intergenic	362533	NM_001109210	Cbln4
chr3	163088297	163088667	-0.192724	10	4.7369e-05	0.000422992	Intergenic	Intergenic	-70294	NM_001025270	Mc3r
chr3	163403894	163404284	0.107801	10	0.00095499	0.00342011	Intergenic	Intergenic	21985	NM_001106548	Fam209a
chr3	163463843	163464178	0.159756	10	5.7384e-08	2.99785e-06	intron (NM_201420, intron 5 of 6)	-intron (NM_201420, intron 5 of 6)	4728	NM_201420	Tfap2c
chr3	163610920	163611579	0.145045	12	0.007579	0.0164745	Intergenic	Intergenic	151967	NM_201420	Tfap2c
chr3	163963256	163963430	-0.112789	10	0.0017482	0.00537807	Intergenic	Intergenic	-49067	NM_198780	Pck1
chr3	164098380	164098615	-0.176923	15	7.713e-08	3.76114e-06	exon (NM_001107807, exon 3 of 3)	-exon (NM_001107807, exon 3 of 3)	6414	NM_001107807	Pmepa1
chr3	164130149	164130578	0.108516	10	0.004844	0.011698	Intergenic	Intergenic	-25452	NM_001107807	Pmepa1
chr3	164153756	164154077	-0.168996	10	0.00037083	0.00170209	Intergenic	Intergenic	-49005	NM_001107807	Pmepa1
chr3	164299076	164299571	0.18757	10	1.0798e-05	0.000158358	Intergenic	Intergenic	-108071	NM_001109542	LOC689618
chr3	164350993	164351061	0.143275	14	3.646e-07	1.28602e-05	Intergenic	Intergenic	-56368	NM_001109542	LOC689618
chr3	164391454	164391599	0.256772	10	4.336e-11	7.53314e-09	Intergenic	Intergenic	-15868	NM_001109542	LOC689618
chr3	164392400	164392624	-0.256611	12	1.6514e-06	4.08907e-05	Intergenic	Intergenic	-14883	NM_001109542	LOC689618
chr3	164429513	164429614	0.2064	10	8.2272e-06	0.00013045	Intergenic	Intergenic	22169	NM_001109542	LOC689618
chr3	164503077	164504010	-0.156198	12	0.00025267	0.00129075	Intergenic	Intergenic	-53075	NM_001108966	Rab22a
chr3	165044821	165045056	-0.160565	16	1.5991e-08	1.07237e-06	intron (NM_001107806, intron 6 of 10)	-intron (NM_001107806, intron 6 of 10)	9053	NM_001107806	Npepl1
chr3	165214634	165214860	-0.11756	12	3.1091e-05	0.000320901	TTS (NM_001159653)	-TTS (NM_001159653)	1348	NM_001159653	Gnas
chr3	167502095	167502217	-0.222476	12	5.5254e-08	2.89874e-06	promoter-TSS (NM_130735)	-promoter-TSS (NM_130735)	-73	NM_130735	Sycp2
chr3	168979910	168980418	0.162782	10	8.0258e-05	0.000600416	Intergenic	Intergenic	126985	NM_001008217	Psma7
chr3	169265432	169265628	-0.13098	10	0.0083787	0.0177561	intron (NM_001191609, intron 5 of 78)	-intron (NM_001191609, intron 5 of 78)	16880	NM_001191609	Lama5
chr3	169752054	169752166	-0.130816	10	1.4941e-07	6.40013e-06	Intergenic	Intergenic	-55218	NM_198743	Gid8
chr3	170377151	170377332	0.115848	10	1.336e-05	0.0001816	exon (NM_001305276, exon 7 of 19)	-exon (NM_001305276, exon 7 of 19)	5919	NM_001305276	Helz2
chr3	170567856	170568653	0.139589	12	0.0025759	0.00721163	promoter-TSS (NM_001107808)	-promoter-TSS (NM_001107808)	-500	NM_001107808	Zbtb46
chr3	170628118	170628296	-0.10185	10	8.0258e-05	0.000600416	exon (NM_001014052, exon 1 of 1)	-exon (NM_001014052, exon 1 of 1)	354	NM_001014052	Abhd16b
chr4	575093	575480	-0.114004	10	1.6496e-05	0.000209512	intron (NM_001166307, intron 3 of 10)	-intron (NM_001166307, intron 3 of 10)	-113911	NM_012589	Il6
chr4	2526439	2526815	-0.101461	12	0.00065321	0.00256027	Intergenic	Intergenic	-50898	NM_001109214	En2
chr4	2631747	2632245	-0.259386	10	1.0507e-06	2.86892e-05	Intergenic	Intergenic	-46314	NM_022392	Insig1
chr4	2809117	2809222	-0.193566	10	1.8749e-09	1.84298e-07	intron (NM_001107844, intron 5 of 19)	-intron (NM_001107844, intron 5 of 19)	18638	NM_001107844	Paxip1
chr4	3669755	3670297	-0.167012	10	0.00084484	0.00311216	Intergenic	Intergenic	-104360	NM_022850	Dpp6
chr4	5452546	5452737	0.167049	10	2.0106e-05	0.000239407	Intergenic	Intergenic	-118776	NM_001025148	Galntl5
chr4	5635330	5635630	0.187177	10	0.00010337	0.000713316	intron (NM_184051, intron 1 of 11)	-intron (NM_184051, intron 1 of 11)	14488	NM_184051	Prkag2
chr4	5817133	5817547	-0.102153	12	0.00018714	0.0010617	exon (NM_001110489, exon 4 of 5)	-exon (NM_001110489, exon 4 of 5)	5307	NM_001110489	Wdr86
chr4	5937383	5937662	0.116571	10	0.01105	0.0219993	intron (NM_001011966, intron 2 of 13)	-intron (NM_001011966, intron 2 of 13)	9308	NM_001011966	Smarcd3
chr4	6608763	6608820	0.333773	10	1.1682e-05	0.000165852	Intergenic	Intergenic	51606	NR_110709	LOC100909675
chr4	7036029	7036313	-0.144392	10	0.0087478	0.0183633	intron (NM_001106575, intron 14 of 14)	-intron (NM_001106575, intron 14 of 14)	75789	NM_001100851	Kmt2e
chr4	8967761	8968044	0.192506	11	0.00087485	0.00319915	intron (NM_001025155, intron 2 of 3)	-intron (NM_001025155, intron 2 of 3)	24205	NM_001025155	Lrrc17
chr4	9025857	9025951	0.215081	10	1.7982e-07	7.36493e-06	intron (NM_001103355, intron 13 of 13)	-intron (NM_001103355, intron 13 of 13)	-33796	NM_001025155	Lrrc17
chr4	9032246	9032457	-0.119752	10	0.026514	0.0441955	Intergenic	Intergenic	-40244	NM_001025155	Lrrc17
chr4	9236551	9236870	0.124144	10	0.0056763	0.0131677	intron (NM_001025044, intron 1 of 16)	-intron (NM_001025044, intron 1 of 16)	868	NM_001025044	Ccdc146
chr4	13993016	13993314	0.122874	10	1.6758e-06	4.12507e-05	Intergenic	Intergenic	-78529	NM_001106578	Sema3c
chr4	19845146	19845301	0.237644	10	6.1456e-10	7.28929e-08	Intergenic	Intergenic	-900200	NM_001105712	Grm3
chr4	25471409	25471648	0.127489	11	4.9326e-05	0.000436191	intron (NM_001108617, intron 2 of 12)	-intron (NM_001108617, intron 2 of 12)	119249	NM_001108617	Cdk14
chr4	25746291	25746913	-0.179852	10	1.0557e-05	0.000155679	intron (NM_001108617, intron 8 of 12)	-intron (NM_001108617, intron 8 of 12)	-247821	NM_021266	Fzd1
chr4	26268505	26268897	0.229929	13	1.6017e-06	4.00189e-05	Intergenic	Intergenic	274278	NM_021266	Fzd1
chr4	27803489	27803672	-0.111875	10	2.1708e-08	1.3605e-06	Intergenic	Intergenic	-185575	NM_001191861	Cdk6
chr4	29590879	29591058	0.158445	11	3.3196e-10	4.47643e-08	Intergenic	Intergenic	-65669	NM_053473	Ppp1r9a
chr4	33978136	33978544	0.11605	11	0.0043248	0.0107203	Intergenic	Intergenic	-45718	NM_012994	Nxph1
chr4	52168211	52168440	0.158418	10	0.00065315	0.00256027	intron (NM_057201, intron 1 of 1)	-intron (NM_057201, intron 1 of 1)	20657	NM_057201	Gpr37
chr4	55934301	55934452	-0.105102	12	0.0064822	0.0146127	Intergenic	Intergenic	-9453	NM_013076	Lep
chr4	56377176	56377382	0.106061	10	0.00073344	0.00279268	Intergenic	Intergenic	30095	NM_053884	Atp6v1f
chr4	57457461	57457761	-0.101609	13	0.014709	0.0274768	intron (NM_001013083, intron 4 of 10)	-intron (NM_001013083, intron 4 of 10)	5500	NM_001013083	Cpa2
chr4	58345911	58346109	0.137756	10	0.0012372	0.00413318	Intergenic	Intergenic	-129692	NM_031359	Mkln1
chr4	59006092	59006210	0.113379	10	8.8845e-05	0.000644143	Intergenic	Intergenic	-347553	NM_138848	Podxl
chr4	59879945	59880142	-0.155913	10	0.00031336	0.00149871	Intergenic	Intergenic	290859	NM_001106588	Chchd3
chr4	61233426	61233978	0.11459	10	0.0069351	0.0154424	intron (NM_053875, intron 17 of 17)	-intron (NM_053875, intron 17 of 17)	-114497	NM_001106589	Lrguk
chr4	61307243	61307439	0.13589	17	7.2444e-05	0.000560945	Intergenic	Intergenic	-40858	NM_001106589	Lrguk
chr4	62076573	62076601	-0.218996	10	0.00024258	0.00126945	Intergenic	Intergenic	-10777	NM_013146	Cald1
chr4	62402880	62403007	0.128579	10	0.0067838	0.0151625	Intergenic	Intergenic	-8681	NM_001270038	RGD1565367
chr4	62968461	62968685	0.105357	10	0.0035296	0.0091869	Intergenic	Intergenic	-44398	NM_024374	Mtpn
chr4	64163386	64163855	0.155927	10	2.1703e-05	0.000252075	Intergenic	Intergenic	-3486	NM_017066	Ptn
chr4	65622086	65622306	-0.12644	10	5.7154e-05	0.000481695	intron (NM_001106591, intron 8 of 19)	-intron (NM_001106591, intron 8 of 19)	48954	NM_001106591	Atp6v0a4
chr4	65659812	65660040	0.107434	10	0.014848	0.0276824	intron (NM_001106591, intron 1 of 19)	-intron (NM_001106591, intron 1 of 19)	11224	NM_001106591	Atp6v0a4
chr4	66164432	66164609	-0.103974	12	0.0011598	0.00393729	intron (NM_001107853, intron 4 of 8)	-intron (NM_001107853, intron 4 of 8)	43037	NM_001107853	Luc7l2
chr4	75840117	75840289	0.14856	10	0.00035727	0.00165264	Intergenic	Intergenic	-66924	NM_001134979	Ezh2
chr4	76523208	76523329	-0.133807	10	1.5267e-05	0.000198908	exon (NM_001024327, exon 4 of 4)	-exon (NM_001024327, exon 4 of 4)	5201	NM_001024327	Zfp467
chr4	77226603	77227096	0.101193	10	0.00015083	0.000927094	Intergenic	Intergenic	24633	NM_001106593	Malsu1
chr4	79675791	79675982	-0.107392	10	0.0028737	0.00784716	intron (NM_001305047, intron 1 of 3)	-intron (NM_001305047, intron 1 of 3)	7818	NM_001305047	Nfe2l3
chr4	80468982	80469118	-0.107934	13	1.1469e-12	3.19703e-10	Intergenic	Intergenic	-4123	NM_012581	Hoxa2
chr4	80480034	80480206	0.199623	10	4.1314e-05	0.00038667	Intergenic	Intergenic	-15193	NM_012581	Hoxa2
chr4	80518177	80518847	0.11531	16	3.3465e-05	0.000335665	promoter-TSS (NM_001109233)	-promoter-TSS (NM_001109233)	-991	NM_001109233	Hoxa9
chr4	80529461	80529536	0.130488	10	2.2483e-07	8.7981e-06	TTS (NR_031946)	-TTS (NR_031946)	964	NR_031946	Mir196b
chr4	80543773	80543942	0.158574	11	1.5092e-07	6.43372e-06	exon (NM_001129878, exon 2 of 2)	-exon (NM_001129878, exon 2 of 2)	-1536	NM_001109234	RGD1564419
chr4	80548989	80549226	-0.134255	10	7.7709e-06	0.000125115	intron (NM_001109234, intron 3 of 3)	-intron (NM_001109234, intron 3 of 3)	-3029	NM_001129878	Hoxa11
chr4	83416906	83417013	-0.202426	10	1.9153e-06	4.51941e-05	exon (NM_001109236, exon 4 of 12)	-exon (NM_001109236, exon 4 of 12)	32247	NM_001109236	Nod1
chr4	86171595	86171910	0.155331	12	8.8597e-05	0.00064397	promoter-TSS (NM_001009519)	-promoter-TSS (NM_001009519)	-864	NM_001009519	Vom1r70
chr4	88359343	88359407	0.154443	10	0.007194	0.0158489	Intergenic	Intergenic	-427925	NM_001100862	Fam13a
chr4	94074080	94074320	-0.137237	10	0.00036061	0.00166356	Intergenic	Intergenic	-35450	NM_001109238	Atoh1
chr4	95749601	95749802	0.137206	15	0.0002414	0.00126661	Intergenic	Intergenic	95309	NM_001109269	Lin28a
chr4	104954518	104954898	-0.109732	10	0.018501	0.0330275	Intergenic	Intergenic	-28217	NM_001108633	Reep1
chr4	105121241	105121304	-0.190506	12	2.4919e-05	0.000274572	intron (NM_001034928, intron 1 of 13)	-intron (NM_001034928, intron 1 of 13)	3303	NM_001034928	Immt
chr4	105290474	105290775	-0.125649	10	7.8489e-08	3.79994e-06	Intergenic	Intergenic	-82760	NM_031337	St3gal5
chr4	105541594	105541880	0.161707	12	5.0298e-08	2.69553e-06	Intergenic	Intergenic	-9619	NM_001109241	Atoh8
chr4	106689024	106689166	-0.1397	10	5.071e-07	1.66301e-05	Intergenic	Intergenic	107854	NM_001109242	RGD1562515
chr4	112101283	112101685	-0.149834	10	0.019883	0.0350656	Intergenic	Intergenic	-179002	NM_001106598_1	Ctnna2
chr4	117298226	117298593	0.190337	10	0.0032627	0.0086627	intron (NM_001109244, intron 1 of 1)	-intron (NM_001109244, intron 1 of 1)	449	NM_001109244	Lbx2
chr4	117331401	117331929	-0.106078	10	0.00025933	0.00131488	TTS (NM_031749)	-TTS (NM_031749)	1888	NM_001106600	Wbp1
chr4	117579291	117579409	-0.22672	10	1.8066e-08	1.17659e-06	Intergenic	Intergenic	16813	NM_001106601	Bola3
chr4	117675348	117675651	-0.134377	10	0.0016629	0.00517317	Intergenic	Intergenic	49883	NM_001106602	Dguok
chr4	117738843	117739164	0.135052	11	5.3926e-08	2.84505e-06	intron (NM_012893, intron 5 of 7)	-intron (NM_012893, intron 5 of 7)	8002	NM_012893	Actg2
chr4	117792197	117792270	0.1334	10	0.024581	0.041475	promoter-TSS (NM_138531)	-promoter-TSS (NM_138531)	-835	NM_138531	Stambp
chr4	117815034	117815203	0.233109	10	0.0020454	0.00607859	Intergenic	Intergenic	-23720	NM_138531	Stambp
chr4	118577447	118578080	0.112123	10	0.0056763	0.0131677	Intergenic	Intergenic	173842	NM_181087	Cyp26b1
chr4	119732964	119733136	-0.282477	11	1.4948e-10	2.30724e-08	exon (NM_001107871, exon 5 of 12)	-exon (NM_001107871, exon 5 of 12)	7110	NM_001107871	Fbxo41
chr4	119771066	119771567	0.108337	10	0.00013532	0.000860212	Intergenic	Intergenic	-3705	NM_019137	Egr4
chr4	119985046	119985471	-0.131446	12	0.0003774	0.00172366	intron (NM_080884, intron 1 of 1)	-intron (NM_080884, intron 1 of 1)	16796	NM_022635	Nat8
chr4	120803332	120803553	0.125056	10	0.0041557	0.0103929	exon (NM_001100749, exon 6 of 6)	-exon (NM_001100749, exon 6 of 6)	18903	NM_001100749	Mxd1
chr4	121985195	121985620	0.120173	10	0.023965	0.0406265	intron (NM_001024331, intron 1 of 2)	-intron (NM_001024331, intron 1 of 2)	14020	NM_001024331	Rab43
chr4	122272115	122272243	0.100532	12	0.013185	0.0253187	Intergenic	Intergenic	-7574	NM_033442	Gata2
chr4	122282077	122282614	-0.112476	17	1.6475e-05	0.000209512	exon (NM_033442, exon 4 of 7)	-exon (NM_033442, exon 4 of 7)	2593	NM_033442	Gata2
chr4	122309765	122309924	0.119123	10	0.0017482	0.00537807	Intergenic	Intergenic	7133	NM_001109248	Dnajb8
chr4	123104121	123104284	-0.278858	10	1.5961e-06	3.99057e-05	Intergenic	Intergenic	108881	NM_053534	Tpra1
chr4	124571937	124572007	0.104278	12	0.0060919	0.0139022	exon (NM_001191974, exon 3 of 3)	-exon (NM_001191974, exon 3 of 3)	7379	NM_001109489	LOC685964
chr4	125326503	125327033	-0.113957	10	0.004092	0.0102689	intron (NM_001106610, intron 1 of 9)	-intron (NM_001106610, intron 1 of 9)	624	NM_001106610	Hdac11
chr4	127453685	127453782	-0.124916	11	0.0015517	0.00491942	Intergenic	Intergenic	-254825	NM_001107877	Adamts9
chr4	128472358	128472876	-0.140496	10	0.0017775	0.00545383	intron (NM_001030045, intron 1 of 17)	-intron (NM_001030045, intron 1 of 17)	124502	NM_001030045	Magi1
chr4	129062212	129062673	-0.181884	10	0.0016768	0.00520713	Intergenic	Intergenic	-9011	NM_001134996	LOC687056
chr4	132711712	132712106	-0.22184	12	2.3593e-09	2.25966e-07	intron (NM_001191089, intron 2 of 9)	-intron (NM_001191089, intron 2 of 9)	177593	NM_001191089	Mitf
chr4	135291722	135291802	-0.166734	10	1.514e-07	6.43372e-06	Intergenic	Intergenic	-138335	NM_001107879	Rybp
chr4	146037279	146037416	-0.114497	17	0.00053474	0.0022191	Intergenic	Intergenic	-295230	NM_031040	Grm7
chr4	149953652	149953749	-0.117032	12	0.0018413	0.00560265	intron (NM_012508, intron 1 of 20)	-intron (NM_012508, intron 1 of 20)	21839	NM_012508	Atp2b2
chr4	150818358	150818657	-0.121361	10	3.8365e-05	0.000368203	exon (NM_001012097, exon 3 of 18)	-exon (NM_001012097, exon 3 of 18)	3802	NM_001012097	Atg7
chr4	150937480	150937870	-0.139317	10	4.4477e-05	0.000406099	intron (NM_001012097, intron 17 of 17)	-intron (NM_001012097, intron 17 of 17)	118061	NM_001015004	Vgll4
chr4	151019976	151020219	0.175227	10	1.6865e-05	0.000212968	intron (NM_001015004, intron 2 of 4)	-intron (NM_001015004, intron 2 of 4)	35638	NM_001015004	Vgll4
chr4	151959805	151960053	0.113902	12	0.00291	0.00792196	Intergenic	Intergenic	-14917	NM_013226	Rpl32
chr4	154029775	154030082	0.104743	10	0.0008674	0.00317834	Intergenic	Intergenic	-99040	NM_001134908	Zfp637
chr4	154474029	154474412	0.171791	16	1.9925e-05	0.000237782	intron (NM_001110099, intron 3 of 18)	-intron (NM_012643, intron 3 of 19)	16882	NM_001110099	Ret
chr4	155847526	155847863	-0.12444	11	0.012283	0.0238999	Intergenic	Intergenic	22895	NM_001271276	Fbxl14
chr4	157304962	157305544	-0.158553	10	0.0011258	0.0038481	intron (NM_022684, intron 1 of 5)	-intron (NM_022684, intron 1 of 5)	13228	NM_022684	Bid
chr4	157368479	157368696	0.104578	13	8.6048e-08	4.10492e-06	intron (NM_001191085, intron 23 of 32)	-intron (NM_001191085, intron 23 of 32)	-50107	NM_022684	Bid
chr4	157511957	157512318	-0.143303	10	0.00013666	0.000866813	intron (NM_001191085, intron 2 of 32)	-intron (NM_001191085, intron 2 of 32)	7788	NM_001191085	Mical3
chr4	157940033	157940351	0.12047	10	8.7949e-05	0.000639883	Intergenic	Intergenic	-36153	NM_207617	Iqsec3
chr4	159067500	159067623	0.109463	10	0.0012911	0.00427767	exon (NM_001109671, exon 1 of 2)	-exon (NM_001109671, exon 1 of 2)	292	NM_001109671	Gdf3
chr4	161350483	161351598	-0.123056	10	0.012693	0.0245265	TTS (NM_001024335)	-TTS (NM_001024335)	-1039	NM_001106622	Tapbpl
chr4	161404838	161405086	0.138954	10	8.7628e-10	9.71267e-08	intron (NM_001040008, intron 1 of 4)	-intron (NM_001040008, intron 1 of 4)	104	NM_001040008	Tuba3a
chr4	162179763	162180340	0.17414	13	0.00012067	0.000794253	intron (NM_013091, intron 2 of 9)	-intron (NM_013091, intron 2 of 9)	7489	NM_013091	Tnfrsf1a
chr4	162200461	162200924	0.166199	12	0.0063377	0.0143394	Intergenic	Intergenic	28130	NM_013091	Tnfrsf1a
chr4	162299010	162299545	-0.169983	12	0.00077899	0.00292262	intron (NM_053018, intron 1 of 7)	-intron (NM_053018, intron 1 of 7)	13611	NM_053018	Cd9
chr4	162308113	162308706	-0.144351	10	0.0001747	0.00102026	intron (NM_053018, intron 1 of 7)	-intron (NM_053018, intron 1 of 7)	4479	NM_053018	Cd9
chr4	162313114	162313331	-0.154167	10	0.0024078	0.00687288	promoter-TSS (NM_053018)	-promoter-TSS (NM_053018)	-334	NM_053018	Cd9
chr4	163304001	163304030	-0.165532	10	1.4443e-05	0.00019158	Intergenic	Intergenic	17838	NM_001079711	Rad51ap1
chr4	164130478	164130792	-0.125754	10	0.0031863	0.00850188	Intergenic	Intergenic	86883	NM_001271385	Prmt8
chr4	164188684	164189016	0.182106	10	0.00012253	0.000800991	intron (NM_001271385, intron 1 of 8)	-intron (NM_001271385, intron 1 of 8)	28668	NM_001271385	Prmt8
chr4	164433850	164434005	-0.25459	10	2.2177e-10	3.22326e-08	intron (NM_001107890, intron 1 of 6)	-intron (NM_001107890, intron 1 of 6)	56827	NM_001107890	Tspan9
chr4	164456962	164457400	0.165051	14	2.7517e-07	1.03197e-05	intron (NM_001107890, intron 1 of 6)	-intron (NM_001107890, intron 1 of 6)	33574	NM_001107890	Tspan9
chr4	164842337	164842630	0.141539	10	0.00087505	0.00319915	Intergenic	Intergenic	-103783	NM_001002833	Senp17
chr4	165760835	165760953	0.196937	10	4.8674e-08	2.63114e-06	intron (NM_001024337, intron 1 of 6)	-intron (NM_001024337, intron 1 of 6)	636	NM_001024337	LOC500331
chr4	167133705	167133875	0.172907	10	6.4516e-07	1.99823e-05	intron (NM_139187, intron 3 of 6)	-intron (NM_139187, intron 3 of 6)	7192	NM_139187	Klrh1
chr4	171133455	171133943	0.119198	10	0.0055085	0.012868	intron (NM_001037353, intron 5 of 7)	-intron (NM_001037353, intron 5 of 7)	-149407	NM_001024338	Bcl2l14
chr4	171877587	171877661	-0.260963	10	1.0965e-08	7.84628e-07	Intergenic	Intergenic	-27180	NM_001003403	Apold1
chr4	173661984	173662202	-0.113149	12	0.0023343	0.00671284	intron (NM_001013927, intron 1 of 10)	-intron (NM_001013927, intron 1 of 10)	5666	NM_001013927	Plbd1
chr4	173782143	173782342	-0.185202	13	6.862e-06	0.000114478	intron (NM_013170_1, intron 2 of 14)	-intron (NM_013170_1, intron 2 of 14)	8873	NM_013170_1	Gucy2c
chr4	173997164	173997450	0.124539	10	3.9187e-05	0.000372835	Intergenic	Intergenic	-10813	NM_001009600	Arhgdib
chr4	174263744	174263866	0.102752	10	2.9383e-05	0.000309415	Intergenic	Intergenic	-112591	NM_017336	Ptpro
chr4	174263968	174264252	0.137742	11	1.1766e-06	3.11699e-05	Intergenic	Intergenic	-112286	NM_017336	Ptpro
chr4	174921689	174921907	0.152844	10	0.00028786	0.00140868	Intergenic	Intergenic	58296	NM_001011969	Strap
chr4	174930829	174931271	-0.286936	10	3.5916e-08	2.04508e-06	Intergenic	Intergenic	67548	NM_001011969	Strap
chr4	175368814	175368866	-0.118691	10	0.023662	0.0401968	Intergenic	Intergenic	120186	NM_134349	Mgst1
chr4	177092368	177092484	0.241258	10	2.5879e-06	5.61684e-05	Intergenic	Intergenic	69683	NM_001012234	Plcz1
chr4	177437525	177437700	0.255898	12	4.7629e-14	2.58907e-11	Intergenic	Intergenic	-178337	NM_139340	Plekha5
chr4	177893733	177894206	0.128598	13	6.2517e-05	0.000511544	Intergenic	Intergenic	72755	NM_001106626	Aebp2
chr4	178769898	178770111	0.108556	10	0.00057068	0.00232663	intron (NM_017337, intron 1 of 15)	-intron (NM_017337, intron 1 of 15)	111109	NM_017337	Pde3a
chr4	179962869	179963418	0.1346	10	0.012012	0.0234459	exon (NM_001113783, exon 5 of 5)	-exon (NM_001113783, exon 5 of 5)	11115	NM_001113783	Golt1b
chr4	180144879	180145181	-0.115923	14	5.3654e-07	1.73368e-05	exon (NM_017099, exon 3 of 3)	-exon (NM_017099, exon 3 of 3)	4905	NM_017099	Kcnj8
chr4	180881937	180882134	0.154333	10	0.00030463	0.00146748	intron (NM_001271267, intron 8 of 14)	-intron (NM_001271267, intron 8 of 14)	-29148	NM_012813	St8sia1
chr4	181513850	181514166	0.149475	10	1.4932e-05	0.000195841	intron (NM_001271267, intron 8 of 14)	-intron (NM_001271267, intron 8 of 14)	345609	NM_001271267	Sox5
chr4	182388738	182389147	-0.155355	15	0.00045462	0.00196385	Intergenic	Intergenic	303974	NM_017253	Bcat1
chr4	182453573	182453922	0.191096	12	0.0042372	0.0105536	Intergenic	Intergenic	239169	NM_017253	Bcat1
chr4	182600319	182600468	-0.238415	10	7.9504e-06	0.00012751	Intergenic	Intergenic	92523	NM_017253	Bcat1
chr4	182822335	182822710	0.1375	12	6.9151e-10	8.04672e-08	TTS (NM_001106627)	-TTS (NM_001106627)	37043	NM_001106627	Casc1
chr4	182963004	182963528	0.13881	11	0.0010888	0.00376051	Intergenic	Intergenic	-68160	NM_031515	Kras
chr4	183617565	183617833	-0.197388	10	1.7381e-06	4.21774e-05	Intergenic	Intergenic	71547	NM_001109255	Sspn
chr4	183621213	183621616	0.1028	12	0.0043631	0.010798	Intergenic	Intergenic	75263	NM_001109255	Sspn
chr4	184500710	184501014	-0.105151	14	0.029575	0.0483422	Intergenic	Intergenic	-20245	NM_001107896	Ppfibp1
chr4	185138465	185138701	0.140703	12	0.00058147	0.00236263	intron (NM_001014061, intron 1 of 9)	-intron (NM_001014061, intron 1 of 9)	35309	NM_001014061	Ccdc91
chr4	186537424	186537800	-0.114872	11	5.3512e-05	0.000462586	Intergenic	Intergenic	-33138	NM_198772	Mettl20
chr4	187114913	187115448	0.196667	10	2.97e-05	0.00031124	Intergenic	Intergenic	193121	NM_001108653	Bicd1
chr5	521819	521972	0.174406	10	6.1443e-08	3.17439e-06	Intergenic	Intergenic	-29727	NM_001106917	Pi15
chr5	2182658	2183112	-0.123655	10	0.0028967	0.00789199	TTS (NM_001007149)	-TTS (NM_001007149)	98554	NM_001007149	Stau2
chr5	5571233	5571585	0.116256	20	0.00086565	0.00317442	exon (NM_001107898, exon 9 of 9)	-exon (NM_001107898, exon 9 of 9)	124812	NM_001107898	Slco5a1
chr5	22762081	22762448	-0.107869	10	0.002331	0.0067049	Intergenic	Intergenic	119174	NR_126574	Lnc056
chr5	22849657	22849916	0.10948	10	9.2517e-05	0.000660131	Intergenic	Intergenic	31652	NR_126574	Lnc056
chr5	23008293	23008895	0.112721	10	0.016865	0.0306028	Intergenic	Intergenic	-127155	NR_126574	Lnc056
chr5	23720234	23720520	0.115228	10	6.8834e-05	0.000542209	Intergenic	Intergenic	-18798	NM_001013038	Gdf6
chr5	25308683	25308720	-0.125991	10	1.2494e-05	0.000173684	Intergenic	Intergenic	-79523	NM_001127564	Esrp1
chr5	49895174	49895452	-0.23415	11	4.4032e-08	2.43303e-06	Intergenic	Intergenic	290163	NM_001107923	Rngtt
chr5	50966378	50966456	-0.250133	12	2.2179e-06	5.0312e-05	Intergenic	Intergenic	-186518	NM_001039914	Akirin2
chr5	51534131	51534467	0.121684	10	0.0010971	0.0037773	Intergenic	Intergenic	-3920	NM_053918	Cga
chr5	57731105	57731269	0.168256	13	2.3843e-09	2.27196e-07	Intergenic	Intergenic	-43885	NM_001106646	Ndufb6
chr5	58304446	58304550	0.136741	12	8.0887e-11	1.331e-08	Intergenic	Intergenic	-9807	NM_001008871	Spink4
chr5	58919573	58919748	0.143862	15	1.6518e-10	2.50812e-08	exon (NM_001108971, exon 3 of 3)	-exon (NM_001108971, exon 3 of 3)	3590	NM_001108971	RGD1309821
chr5	60129656	60130144	-0.121706	12	0.010339	0.0209364	exon (NM_001173555, exon 2 of 7)	-exon (NM_001173555, exon 2 of 7)	374	NM_001173555	Spag8
chr5	60140992	60141220	-0.111837	10	0.0058926	0.0135467	intron (NM_001013934, intron 3 of 6)	-intron (NM_001013934, intron 3 of 6)	4641	NM_001013934	Fam221b
chr5	60528896	60528943	-0.176798	10	1.5872e-10	2.41986e-08	intron (NM_053765, intron 2 of 11)	-intron (NM_053765, intron 2 of 11)	7483	NM_053765	Gne
chr5	60528951	60529107	-0.154895	11	0.0011302	0.00386031	intron (NM_053765, intron 2 of 11)	-intron (NM_053765, intron 2 of 11)	7374	NM_053765	Gne
chr5	60916436	60916619	-0.134145	10	0.00016156	0.000970061	Intergenic	Intergenic	129405	NM_001108662	Melk
chr5	60993290	60993556	0.18946	12	4.3656e-05	0.000401359	Intergenic	Intergenic	137892	NM_001109261	Pax5
chr5	61756553	61757203	-0.112872	10	0.0028282	0.00774727	Intergenic	Intergenic	-106086	NM_001013090	Trmt10b
chr5	62669578	62669688	0.182454	10	4.1576e-06	8.00097e-05	TTS (NM_013044)	-TTS (NM_013044)	21328	NM_001108663	Tstd2
chr5	62759532	62759723	0.141057	10	2.5879e-06	5.61684e-05	Intergenic	Intergenic	-8857	NM_001106656	Xpa
chr5	63210399	63210681	0.121865	10	4.5901e-05	0.00041444	intron (NM_001107933, intron 1 of 10)	-intron (NM_001107933, intron 1 of 10)	14705	NM_001107933	Tbc1d2
chr5	63490153	63490512	0.137462	12	4.2962e-05	0.000397218	intron (NM_031802, intron 2 of 19)	-intron (NM_031802, intron 2 of 19)	121574	NM_031802	Gabbr2
chr5	70424986	70425242	-0.137234	13	0.00048876	0.0020789	promoter-TSS (NM_001161846)	-promoter-TSS (NM_001161846)	75	NM_001161846	Nipsnap3a
chr5	70852620	70853003	0.135431	11	0.0015744	0.00497492	Intergenic	Intergenic	-24741	NM_053492	Slc44a1
chr5	71424573	71424787	-0.169993	10	7.6389e-08	3.73476e-06	Intergenic	Intergenic	148861	NM_001014191	Tmem38b
chr5	73453284	73453500	0.164366	13	1.2187e-05	0.000170367	Intergenic	Intergenic	-2106	NM_053713	Klf4
chr5	73662814	73663193	-0.102706	14	0.0035877	0.00930634	Intergenic	Intergenic	-211718	NM_053713	Klf4
chr5	75643201	75643439	-0.119937	10	0.0013703	0.00447655	intron (NM_001305995, intron 5 of 5)	-intron (NM_001305995, intron 5 of 5)	124487	NM_001305995	Palm2
chr5	78051878	78052054	0.13497	12	1.5912e-06	3.98632e-05	exon (NM_001106652, exon 1 of 4)	-exon (NM_001106652, exon 1 of 4)	646	NM_001106652	Slc46a2
chr5	80408473	80408763	-0.103604	10	0.011602	0.0228149	intron (NM_181088, intron 3 of 12)	-intron (NM_181088, intron 3 of 12)	-40557	NM_001108668	Akna
chr5	99792528	99792614	0.141093	10	4.7073e-14	2.58907e-11	Intergenic	Intergenic	192997	NM_001025022	Lurap1l
chr5	101404095	101404922	-0.1451	10	3.6383e-05	0.000356603	intron (NM_031566, intron 1 of 10)	-intron (NM_031566, intron 1 of 10)	5398	NM_031566	Nfib
chr5	101753964	101754492	0.196077	11	4.9776e-05	0.000439132	Intergenic	Intergenic	5223	NM_001115031	Cer1
chr5	104051338	104051399	0.227404	10	8.458e-09	6.33392e-07	Intergenic	Intergenic	-77905	NM_053935	Sh3gl2
chr5	115282617	115282698	0.2025	10	4.2188e-14	2.58907e-11	Intergenic	Intergenic	-58451	NM_001039345	Eqtn
chr5	117959934	117960585	-0.12415	10	3.8956e-09	3.36834e-07	Intergenic	Intergenic	-204981	NM_012988	Nfia
chr5	118087228	118087557	-0.123443	11	0.0017424	0.00536863	Intergenic	Intergenic	-77848	NM_012988	Nfia
chr5	121685398	121685574	-0.159518	10	2.9827e-09	2.73742e-07	Intergenic	Intergenic	-39087	NM_001191867	Raver2
chr5	121802252	121802428	-0.100237	10	0.00041831	0.00185726	exon (NM_001191867, exon 12 of 12)	-exon (NM_001191867, exon 12 of 12)	77767	NM_001191867	Raver2
chr5	127596422	127596463	-0.111108	10	0.0034475	0.00901782	Intergenic	Intergenic	-40995	NM_001080148	Dhcr24
chr5	128616504	128616664	-0.185693	10	0.00017641	0.00102352	Intergenic	Intergenic	146820	NM_001025023	Ndc1
chr5	129125345	129125382	-0.141853	10	0.0013703	0.00447655	Intergenic	Intergenic	50253	NM_001108973	Slc1a7
chr5	130290906	130291036	0.120273	10	0.0043189	0.0107078	Intergenic	Intergenic	-55009	NM_012993	Nrd1
chr5	134736991	134737130	0.15919	10	7.2459e-05	0.000560945	Intergenic	Intergenic	549487	NM_134339	Foxe3
chr5	135265406	135265741	0.14346	11	3.7354e-07	1.30767e-05	Intergenic	Intergenic	20974	NM_134339	Foxe3
chr5	135274513	135274570	-0.121013	10	0.0001003	0.000697414	Intergenic	Intergenic	12006	NM_134339	Foxe3
chr5	135437454	135437756	-0.147871	10	0.0080818	0.0172918	intron (NM_001107958, intron 4 of 5)	-intron (NM_001107958, intron 4 of 5)	6186	NM_001107958	Tal1
chr5	137443334	137443483	-0.118067	10	5.0264e-11	8.57311e-09	TTS (NM_022187)	-TTS (NM_022187)	5306	NM_022187	Plk3
chr5	138409922	138410139	-0.133405	10	0.0020287	0.00603905	intron (NM_031697, intron 9 of 11)	-intron (NM_031697, intron 9 of 11)	-15781	NM_053397	Artn
chr5	138480543	138480794	0.130657	10	0.00023572	0.00124503	intron (NM_031697, intron 4 of 11)	-intron (NM_031697, intron 4 of 11)	-86419	NM_053397	Artn
chr5	138622948	138623302	-0.160382	10	7.6264e-05	0.000581721	intron (NM_001107966, intron 10 of 20)	-intron (NM_001107966, intron 10 of 20)	-23838	NM_031697	St3gal3
chr5	138651088	138652017	-0.113141	14	0.0033098	0.00877064	Intergenic	Intergenic	-3030	NM_001107966	Kdm4a
chr5	139039340	139039467	0.123723	12	0.021647	0.037417	Intergenic	Intergenic	30165	NM_001107967	Tmem125
chr5	139652193	139652553	0.201603	10	0.025212	0.0423732	Intergenic	Intergenic	-38431	NM_138827	Slc2a1
chr5	140609043	140609174	-0.194695	10	4.2563e-06	8.1281e-05	Intergenic	Intergenic	-40036	NM_001107972	Hivep3
chr5	140743876	140744501	-0.125166	10	0.0012372	0.00413318	intron (NM_012549, intron 2 of 4)	-intron (NM_012549, intron 2 of 4)	1503	NM_012549	Edn2
chr5	141308213	141308508	0.172655	10	1.7432e-05	0.000218247	Intergenic	Intergenic	49797	NM_053699	Cited4
chr5	142661132	142661258	-0.124663	12	3.7168e-05	0.000360794	exon (NM_001135758, exon 98 of 98)	-exon (NM_001135758, exon 98 of 98)	-7413	NM_001109432	Bmp8a
chr5	142962893	142963362	0.115564	10	0.0055918	0.0130162	intron (NM_001135758, intron 1 of 97)	-intron (NM_001135758, intron 1 of 97)	23904	NM_001135758	Macf1
chr5	143458508	143458760	0.144943	12	9.3507e-05	0.000665542	Intergenic	Intergenic	7024	NR_126576	Lnc081
chr5	144031031	144031173	0.105212	10	0.0011752	0.00397476	exon (NM_001107979, exon 2 of 6)	-exon (NM_001107979, exon 2 of 6)	4658	NM_001107979	Fhl3
chr5	144138060	144138249	0.165687	10	0.00080135	0.00298522	exon (NM_001108677, exon 2 of 11)	-exon (NM_001108677, exon 2 of 11)	2481	NM_001108677	Mtf1
chr5	144414065	144414273	-0.138646	12	2.5542e-05	0.000279295	exon (NM_001014069, exon 3 of 4)	-exon (NM_001014069, exon 3 of 4)	5091	NM_001014069	Snip1
chr5	144844750	144844994	0.102375	10	2.7251e-05	0.000292838	intron (NM_181373, intron 1 of 15)	-intron (NM_181373, intron 1 of 15)	2498	NM_181373	Grik3
chr5	145150284	145150748	-0.254124	10	2.3676e-05	0.000265497	Intergenic	Intergenic	-224080	NM_001106685	Csf3r
chr5	145336828	145337107	-0.108439	10	1.8417e-05	0.000226218	Intergenic	Intergenic	-37628	NM_001106685	Csf3r
chr5	145520684	145520979	-0.137796	12	0.0020874	0.00617492	promoter-TSS (NM_001162535)	-promoter-TSS (NM_001162535)	-756	NM_001162535	Sh3d21
chr5	145658957	145659193	0.103468	10	0.00031632	0.00150746	Intergenic	Intergenic	28630	NM_001008376	Trappc3
chr5	146659500	146659885	0.172034	10	0.00056555	0.00231127	intron (NM_173138, intron 6 of 10)	-intron (NM_173138, intron 6 of 10)	21023	NM_001276304	Dlgap3
chr5	146770321	146770605	0.128938	15	9.1952e-06	0.000141368	Intergenic	Intergenic	2153	NM_019240	Gjb3
chr5	146805042	146805340	-0.116357	10	0.00052121	0.00217625	Intergenic	Intergenic	-1527	NM_019241	Gjb5
chr5	147158328	147158414	0.103782	10	1.5099e-05	0.000197249	Intergenic	Intergenic	328812	NM_001109463	Hmgb4
chr5	147790443	147791054	0.136871	10	0.0018072	0.00551912	Intergenic	Intergenic	54318	NM_001108682	Tlr12
chr5	147842337	147842679	-0.119196	10	0.002548	0.00715228	exon (NM_001108682, exon 1 of 1)	-exon (NM_001108682, exon 1 of 1)	2559	NM_001108682	Tlr12
chr5	148589553	148589873	0.205214	12	1.473e-05	0.000194283	exon (NM_001109265, exon 1 of 3)	-exon (NM_001109265, exon 1 of 3)	533	NM_001109265	Zbtb8b
chr5	149014861	149015303	-0.132763	10	0.0019792	0.00592855	intron (NM_001107914, intron 1 of 28)	-intron (NM_001107914, intron 1 of 28)	1029	NM_001107914	Adgrb2
chr5	150001977	150002214	0.125948	10	0.0093287	0.0193382	Intergenic	Intergenic	196452	NM_001006979	Matn1
chr5	151005061	151005144	-0.109964	10	0.0044536	0.0109625	intron (NM_012617, intron 1 of 2)	-intron (NM_012617, intron 1 of 2)	8963	NM_012617	Oprd1
chr5	151047844	151047986	0.106276	10	0.00088275	0.00322131	Intergenic	Intergenic	-33849	NM_012617	Oprd1
chr5	151478311	151478767	0.172291	10	0.00041831	0.00185726	Intergenic	Intergenic	18820	NM_001270959	Gpn2
chr5	151863404	151863934	-0.10299	10	0.027357	0.0453759	intron (NM_001025651, intron 1 of 13)	-intron (NM_001025651, intron 1 of 13)	759	NM_001025651	Sytl1
chr5	151869819	151870089	0.160715	10	0.00029335	0.00142843	intron (NM_001025651, intron 10 of 13)	-intron (NM_001025651, intron 10 of 13)	7044	NM_001025651	Sytl1
chr5	151874940	151875111	0.178298	10	0.0004261	0.00188379	intron (NM_001107909, intron 24 of 28)	-intron (NM_001107909, intron 24 of 28)	10457	NM_001107909	Map3k6
chr5	152025893	152026105	0.181352	10	1.4125e-05	0.000188905	Intergenic	Intergenic	75967	NM_001134956	Ahdc1
chr5	152142747	152143175	-0.167159	10	0.00036061	0.00166356	intron (NM_024145, intron 1 of 12)	-intron (NM_024145, intron 1 of 12)	4096	NM_024145	Fgr
chr5	152707508	152707837	-0.12499	12	0.00032276	0.00153073	Intergenic	Intergenic	7854	NM_001025624	Hmgn2
chr5	152846334	152846631	-0.236526	11	2.4415e-09	2.31465e-07	Intergenic	Intergenic	-1940	NM_053983	Cd52
chr5	153264308	153264443	0.303235	10	1.2862e-12	3.48141e-10	TTS (NM_001034081)	-TTS (NM_001034081)	944	NM_001034081	Paqr7
chr5	153424790	153425248	0.102889	15	0.020696	0.0361158	intron (NM_001108687, intron 1 of 11)	-intron (NM_001108687, intron 1 of 11)	34767	NM_001108687	Man1c1
chr5	153505296	153505906	-0.194353	19	5.0039e-08	2.6855e-06	exon (NM_001109271, exon 9 of 9)	-exon (NM_001109271, exon 9 of 9)	21922	NM_001109271	Ldlrap1
chr5	153521932	153522462	0.157576	10	4.7369e-05	0.000422992	intron (NM_001109271, intron 1 of 8)	-intron (NM_001109271, intron 1 of 8)	5326	NM_001109271	Ldlrap1
chr5	153543889	153544106	-0.12608	10	0.0020454	0.00607859	Intergenic	Intergenic	-16475	NM_001109271	Ldlrap1
chr5	153741838	153742155	-0.124868	13	0.0014641	0.0047186	Intergenic	Intergenic	34343	NM_133417	Syf2
chr5	153763162	153763342	-0.100626	10	0.021216	0.0368682	Intergenic	Intergenic	55598	NM_133417	Syf2
chr5	153778588	153778801	-0.11974	10	0.0071415	0.0158237	Intergenic	Intergenic	71041	NM_133417	Syf2
chr5	153948935	153949243	0.163039	11	3.1447e-08	1.83251e-06	Intergenic	Intergenic	-1027	NM_130425	Runx3
chr5	154172494	154172667	0.209851	10	7.1356e-07	2.15642e-05	promoter-TSS (NM_001253918)	-promoter-TSS (NM_001253918)	85	NM_001253918	Ncmap
chr5	154209038	154209227	0.286199	16	4.563e-14	2.58907e-11	TTS (NM_001012746)	-TTS (NM_001012746)	8235	NM_001012746	Rcan3
chr5	154750755	154751058	-0.11675	10	0.0043522	0.0107768	TTS (NM_080783)	-TTS (NM_080783)	4122	NM_031342	Lypla2
chr5	154948848	154949025	0.152359	10	0.014452	0.0272172	Intergenic	Intergenic	14799	NM_013058	Id3
chr5	155518299	155518654	-0.102107	12	3.4518e-07	1.22934e-05	intron (NM_001127319, intron 3 of 15)	-intron (NM_001127319, intron 3 of 15)	86907	NM_001127319	Ephb2
chr5	155524603	155525539	-0.111479	12	0.0073717	0.0161527	intron (NM_001127319, intron 3 of 15)	-intron (NM_001127319, intron 3 of 15)	80313	NM_001127319	Ephb2
chr5	155556567	155556991	0.104103	11	0.00019767	0.00110355	intron (NM_001127319, intron 1 of 15)	-intron (NM_001127319, intron 1 of 15)	48605	NM_001127319	Ephb2
chr5	155701790	155702729	0.103199	13	4.2432e-05	0.000394466	Intergenic	Intergenic	-37080	NM_001008515	C1qa
chr5	155854889	155855535	0.164031	21	3.9008e-10	5.0561e-08	Intergenic	Intergenic	-41882	NM_001191871	Zbtb40
chr5	155908505	155908751	0.181721	10	4.1752e-05	0.000389112	Intergenic	Intergenic	-95298	NM_001191871	Zbtb40
chr5	156087801	156088100	-0.101061	10	0.0093287	0.0193382	Intergenic	Intergenic	23580	NM_053402	Wnt4
chr5	156479969	156480328	-0.163018	10	2.1468e-05	0.000250248	intron (NM_001100713, intron 15 of 25)	-intron (NM_001100713, intron 15 of 25)	37689	NM_001100713	Rap1gap
chr5	156664585	156665873	0.115015	20	1.7444e-05	0.000218287	intron (NM_053596, intron 1 of 18)	-intron (NM_053596, intron 1 of 18)	29573	NM_053596	Ece1
[truncated: 671 more rows]
