# Supplementary material for: Integrated Analysis of Omics Data Reveal AP-1 as a Potential Regulation Hub in the Inflammation-Induced Hyperalgesia Rat Model
Source: Front Immunol. 2021 May 28;12:672498. doi: 10.3389/fimmu.2021.672498 (PMC8194263; doi:10.3389/fimmu.2021.672498)
Supplement: Supplementary file 6 [file Table_5.xlsx]

## Sheet: Sheet1
mature_mirna_acc	mature_mirna_id	target_symbol	target_entrez	target_ensembl	elmmo	microcosm	miranda	mirdb	mirecords	mirtarbase	tarbase	predicted.sum	validated.sum	all.sum
MIMAT0001538	rno-miR-429	Rps6kb1	83840	ENSRNOG00000003919	1	1	1	1	0	0	0	4	0	4
MIMAT0001538	rno-miR-429	Spryd7	290303	ENSRNOG00000015095	1	1	1	1	0	0	0	4	0	4
MIMAT0005280	rno-miR-743b-3p	Ggnbp2	360584	ENSRNOG00000027860	1	1	2	1	0	0	0	4	0	4
MIMAT0001538	rno-miR-429	Fhl1	25177	ENSRNOG00000000875	1	1	0	2	0	0	0	3	0	3
MIMAT0001538	rno-miR-429	Fn1	25661	ENSRNOG00000014288	0	1	2	1	0	0	0	3	0	3
MIMAT0001538	rno-miR-429	Gpm6a	306439	ENSRNOG00000010731	3	0	2	1	0	0	0	3	0	3
MIMAT0001538	rno-miR-429	Igsf10	310448	ENSRNOG00000013917	1	0	1	1	0	0	0	3	0	3
MIMAT0001538	rno-miR-429	Jun	24516	ENSRNOG00000026293	1	0	1	1	0	0	0	3	0	3
MIMAT0001538	rno-miR-429	Lrp4	83469	ENSRNOG00000015285	1	0	1	1	0	0	0	3	0	3
MIMAT0001538	rno-miR-429	Mdm4	304798	ENSRNOG00000009696	2	2	0	1	0	0	0	3	0	3
MIMAT0001538	rno-miR-429	Nfya	29508	ENSRNOG00000012702	1	0	1	1	0	0	0	3	0	3
MIMAT0001538	rno-miR-429	Ntf3	81737	ENSRNOG00000019716	2	1	1	0	0	0	0	3	0	3
MIMAT0001538	rno-miR-429	Pdik1l	313609	ENSRNOG00000016536	1	1	0	1	0	0	0	3	0	3
MIMAT0001538	rno-miR-429	Slc6a1	79212	ENSRNOG00000006527	1	0	1	1	0	0	0	3	0	3
MIMAT0001538	rno-miR-429	Sulf1	171396	ENSRNOG00000009037	1	1	0	1	0	0	0	3	0	3
MIMAT0001538	rno-miR-429	Tmem41b	361626	ENSRNOG00000010752	2	0	1	1	0	0	0	3	0	3
MIMAT0001538	rno-miR-429	Tob1	170842	ENSRNOG00000002828	1	0	1	1	0	0	0	3	0	3
MIMAT0001538	rno-miR-429	Zeb1	25705	ENSRNOG00000017863	0	1	0	0	1	1	0	1	2	3
MIMAT0005280	rno-miR-743b-3p	Mmp16	65205	ENSRNOG00000005708	1	1	0	1	0	0	0	3	0	3
MIMAT0005280	rno-miR-743b-3p	Slc39a9	314275	ENSRNOG00000005052	0	1	1	1	0	0	0	3	0	3
MIMAT0012850	rno-miR-465-5p	Gosr1	94189	ENSRNOG00000003971	1	0	1	1	0	0	0	3	0	3
MIMAT0012850	rno-miR-465-5p	Gpr85	64020	ENSRNOG00000024636	1	0	1	1	0	0	0	3	0	3
MIMAT0012850	rno-miR-465-5p	Jam3	315509	ENSRNOG00000009149	1	0	1	1	0	0	0	3	0	3
MIMAT0012850	rno-miR-465-5p	Kitlg	60427	ENSRNOG00000005386	3	0	1	1	0	0	0	3	0	3
MIMAT0012850	rno-miR-465-5p	Mogs	78947	ENSRNOG00000008648	1	0	1	1	0	0	0	3	0	3
MIMAT0012850	rno-miR-465-5p	Pak1	29431	ENSRNOG00000029784	1	0	1	1	0	0	0	3	0	3
MIMAT0012850	rno-miR-465-5p	Ptp4a1	29463	ENSRNOG00000011771	1	0	2	1	0	0	0	3	0	3
MIMAT0012850	rno-miR-465-5p	Strap	297699	ENSRNOG00000007134	1	0	1	1	0	0	0	3	0	3
MIMAT0000599	rno-miR-349	B4galt3	494342	ENSRNOG00000003551	0	1	0	1	0	0	0	2	0	2
MIMAT0000599	rno-miR-349	Dbn1	81653	ENSRNOG00000014170	0	0	1	1	0	0	0	2	0	2
MIMAT0000599	rno-miR-349	Dynlt3	363448	ENSRNOG00000003611	0	0	1	1	0	0	0	2	0	2
MIMAT0000599	rno-miR-349	Pard6b	362279	ENSRNOG00000010883	0	1	0	1	0	0	0	2	0	2
MIMAT0000599	rno-miR-349	Pigu	353304	ENSRNOG00000025181	0	2	0	1	0	0	0	2	0	2
MIMAT0000599	rno-miR-349	Smndc1	287768	ENSRNOG00000014833	0	0	1	1	0	0	0	2	0	2
MIMAT0000599	rno-miR-349	Zfp518a	309478	ENSRNOG00000036592	0	0	1	1	0	0	0	2	0	2
MIMAT0000861	rno-miR-184	Abcc12	291923	ENSRNOG00000015666	0	1	1	0	0	0	0	2	0	2
MIMAT0000899	rno-miR-297	Acox2	252898	ENSRNOG00000007378	0	1	1	0	0	0	0	2	0	2
MIMAT0000899	rno-miR-297	Ano4	299714	ENSRNOG00000006841	0	1	0	1	0	0	0	2	0	2
MIMAT0000899	rno-miR-297	Aqp3	65133	ENSRNOG00000009797	0	0	1	1	0	0	0	2	0	2
MIMAT0000899	rno-miR-297	Azin1	58961	ENSRNOG00000005333	0	0	1	1	0	0	0	2	0	2
MIMAT0000899	rno-miR-297	Chic1	363484	ENSRNOG00000037919	0	1	0	1	0	0	0	2	0	2
MIMAT0000899	rno-miR-297	Cntn3	54279	ENSRNOG00000006144	0	1	0	1	0	0	0	2	0	2
MIMAT0000899	rno-miR-297	Cops2	261736	ENSRNOG00000008744	0	0	1	1	0	0	0	2	0	2
MIMAT0000899	rno-miR-297	E2f8	308607	ENSRNOG00000022537	0	3	0	1	0	0	0	2	0	2
MIMAT0000899	rno-miR-297	Eif4enif1	305468	ENSRNOG00000018475	0	1	0	1	0	0	0	2	0	2
MIMAT0000899	rno-miR-297	Elavl4	286973	ENSRNOG00000023601	0	2	1	0	0	0	0	2	0	2
MIMAT0000899	rno-miR-297	Fbxo9	300849	ENSRNOG00000008214	0	2	0	1	0	0	0	2	0	2
MIMAT0000899	rno-miR-297	Fech	361338	ENSRNOG00000018053	0	1	0	1	0	0	0	2	0	2
MIMAT0000899	rno-miR-297	Iars	306804	ENSRNOG00000014616	0	1	0	1	0	0	0	2	0	2
MIMAT0000899	rno-miR-297	Igsf6	171064	ENSRNOG00000017277	0	1	0	1	0	0	0	2	0	2
MIMAT0000899	rno-miR-297	Lamp2	24944	ENSRNOG00000000164	0	0	1	1	0	0	0	2	0	2
MIMAT0000899	rno-miR-297	Lsg1	288029	ENSRNOG00000001727	0	3	1	0	0	0	0	2	0	2
MIMAT0000899	rno-miR-297	Mnat1	266713	ENSRNOG00000007267	0	1	1	0	0	0	0	2	0	2
MIMAT0000899	rno-miR-297	Ncam2	288280	ENSRNOG00000002126	0	0	1	1	0	0	0	2	0	2
MIMAT0000899	rno-miR-297	Nefl	83613	ENSRNOG00000013658	0	1	1	0	0	0	0	2	0	2
MIMAT0000899	rno-miR-297	Ntrk3	29613	ENSRNOG00000018674	0	2	1	0	0	0	0	2	0	2
MIMAT0000899	rno-miR-297	Pon3	312086	ENSRNOG00000009096	0	1	1	0	0	0	0	2	0	2
MIMAT0000899	rno-miR-297	Ppp1r12b	304813	ENSRNOG00000051440	0	1	0	1	0	0	0	2	0	2
MIMAT0000899	rno-miR-297	Ppp2r2d	246255	ENSRNOG00000016940	0	1	1	0	0	0	0	2	0	2
MIMAT0000899	rno-miR-297	Sigmar1	29336	ENSRNOG00000014604	0	1	0	1	0	0	0	2	0	2
MIMAT0000899	rno-miR-297	Sit1	500449	ENSRNOG00000021546	0	1	1	0	0	0	0	2	0	2
MIMAT0000899	rno-miR-297	Wsb1	303336	ENSRNOG00000012929	0	0	1	1	0	0	0	2	0	2
MIMAT0000899	rno-miR-297	Ypel5	298792	ENSRNOG00000026742	0	0	1	1	0	0	0	2	0	2
MIMAT0001538	rno-miR-429	Actc1	29275	ENSRNOG00000008536	0	1	1	0	0	0	0	2	0	2
MIMAT0001538	rno-miR-429	Adrb2	24176	ENSRNOG00000019217	1	0	1	0	0	0	0	2	0	2
MIMAT0001538	rno-miR-429	Agfg1	363266	ENSRNOG00000015619	1	0	0	1	0	0	0	2	0	2
MIMAT0001538	rno-miR-429	Ap1s2	302671	ENSRNOG00000038686	1	0	0	1	0	0	0	2	0	2
MIMAT0001538	rno-miR-429	Arid4b	84481	ENSRNOG00000016391	1	0	1	0	0	0	0	2	0	2
MIMAT0001538	rno-miR-429	Arih1	300756	ENSRNOG00000009887	1	0	0	1	0	0	0	2	0	2
MIMAT0001538	rno-miR-429	Atp6v0e1	94170	ENSRNOG00000003269	1	0	1	0	0	0	0	2	0	2
MIMAT0001538	rno-miR-429	Atxn1	25049	ENSRNOG00000016998	1	0	1	0	0	0	0	2	0	2
MIMAT0001538	rno-miR-429	Bag6	94342	ENSRNOG00000000851	1	0	1	0	0	0	0	2	0	2
MIMAT0001538	rno-miR-429	Cacna1c	24239	ENSRNOG00000007090	1	0	1	0	0	0	0	2	0	2
MIMAT0001538	rno-miR-429	Cbx3	297093	ENSRNOG00000011814	1	0	1	0	0	0	0	2	0	2
MIMAT0001538	rno-miR-429	Cdh11	84407	ENSRNOG00000013481	1	0	0	1	0	0	0	2	0	2
MIMAT0001538	rno-miR-429	Cdk17	314743	ENSRNOG00000004148	1	0	0	1	0	0	0	2	0	2
MIMAT0001538	rno-miR-429	Cep41	500069	ENSRNOG00000010950	1	0	1	0	0	0	0	2	0	2
MIMAT0001538	rno-miR-429	Chrdl1	363455	ENSRNOG00000004330	1	0	1	0	0	0	0	2	0	2
MIMAT0001538	rno-miR-429	Cited2	114490	ENSRNOG00000056940	1	0	1	0	0	0	0	2	0	2
MIMAT0001538	rno-miR-429	Ckap4	362859	ENSRNOG00000008016	1	0	0	1	0	0	0	2	0	2
MIMAT0001538	rno-miR-429	Cnep1r1	291914	ENSRNOG00000015534	2	0	0	1	0	0	0	2	0	2
MIMAT0001538	rno-miR-429	Cnn3	54321	ENSRNOG00000011559	1	0	1	0	0	0	0	2	0	2
MIMAT0001538	rno-miR-429	Cops8	363283	ENSRNOG00000019635	1	0	1	0	0	0	0	2	0	2
MIMAT0001538	rno-miR-429	Crh	81648	ENSRNOG00000012703	1	0	1	0	0	0	0	2	0	2
MIMAT0001538	rno-miR-429	Crhbp	29625	ENSRNOG00000017890	1	1	0	0	0	0	0	2	0	2
MIMAT0001538	rno-miR-429	Dennd5a	308942	ENSRNOG00000012206	1	0	0	1	0	0	0	2	0	2
MIMAT0001538	rno-miR-429	Desi2	289277	ENSRNOG00000004524	1	0	0	1	0	0	0	2	0	2
MIMAT0001538	rno-miR-429	Dgat2	252900	ENSRNOG00000016573	1	0	1	0	0	0	0	2	0	2
MIMAT0001538	rno-miR-429	Dnajb5	313811	ENSRNOG00000000130	1	0	0	1	0	0	0	2	0	2
MIMAT0001538	rno-miR-429	Dnajc5	79130	ENSRNOG00000015202	1	1	0	0	0	0	0	2	0	2
MIMAT0001538	rno-miR-429	Dpy19l1	315496	ENSRNOG00000026589	2	0	0	1	0	0	0	2	0	2
MIMAT0001538	rno-miR-429	Dusp1	114856	ENSRNOG00000003977	1	0	0	1	0	0	0	2	0	2
MIMAT0001538	rno-miR-429	Efna1	94268	ENSRNOG00000020573	1	0	1	0	0	0	0	2	0	2
MIMAT0001538	rno-miR-429	Eif2s1	54318	ENSRNOG00000009432	1	0	1	0	0	0	0	2	0	2
MIMAT0001538	rno-miR-429	Elf2	361944	ENSRNOG00000010815	1	0	1	0	0	0	0	2	0	2
MIMAT0001538	rno-miR-429	Elmod2	688581	ENSRNOG00000028176	2	0	0	1	0	0	0	2	0	2
MIMAT0001538	rno-miR-429	Eps8	312812	ENSRNOG00000007047	2	0	0	1	0	0	0	2	0	2
MIMAT0001538	rno-miR-429	Ermp1	373544	ENSRNOG00000010915	1	0	0	1	0	0	0	2	0	2
MIMAT0001538	rno-miR-429	Ets1	24356	ENSRNOG00000008941	2	0	1	0	0	0	0	2	0	2
MIMAT0001538	rno-miR-429	Fam118b	315549	ENSRNOG00000011543	1	0	1	0	0	0	0	2	0	2
MIMAT0001538	rno-miR-429	Fat3	191571	ENSRNOG00000011585	1	0	1	0	0	0	0	2	0	2
MIMAT0001538	rno-miR-429	Fbxo33	314157	ENSRNOG00000005285	1	0	0	1	0	0	0	2	0	2
MIMAT0001538	rno-miR-429	Flt1	100911280	ENSRNOG00000000940	1	1	0	0	0	0	0	2	0	2
MIMAT0001538	rno-miR-429	Foxg1	24370	ENSRNOG00000047891	2	0	1	0	0	0	0	2	0	2
MIMAT0001538	rno-miR-429	Foxn2	301676	ENSRNOG00000040110	1	0	0	1	0	0	0	2	0	2
MIMAT0001538	rno-miR-429	Gata4	54254	ENSRNOG00000010708	1	0	1	0	0	0	0	2	0	2
MIMAT0001538	rno-miR-429	Git2	304546	ENSRNOG00000001190	1	0	0	1	0	0	0	2	0	2
MIMAT0001538	rno-miR-429	Golga7	361171	ENSRNOG00000017956	1	0	0	1	0	0	0	2	0	2
MIMAT0001538	rno-miR-429	Gpr158	291352	ENSRNOG00000024832	1	0	0	1	0	0	0	2	0	2
MIMAT0001538	rno-miR-429	Gprasp1	171407	ENSRNOG00000049985	1	0	1	0	0	0	0	2	0	2
MIMAT0001538	rno-miR-429	Grid2	79220	ENSRNOG00000006174	1	0	1	0	0	0	0	2	0	2
MIMAT0001538	rno-miR-429	Gtf2b	81673	ENSRNOG00000011135	0	1	1	0	0	0	0	2	0	2
MIMAT0001538	rno-miR-429	Hmgb3	305373	ENSRNOG00000011096	1	0	0	1	0	0	0	2	0	2
MIMAT0001538	rno-miR-429	Hnrpd	79256	ENSRNOG00000002292	1	0	1	0	0	0	0	2	0	2
MIMAT0001538	rno-miR-429	Iah1	298917	ENSRNOG00000060853	1	1	0	0	0	0	0	2	0	2
MIMAT0001538	rno-miR-429	Inpp4a	80849	ENSRNOG00000017660	1	0	1	0	0	0	0	2	0	2
MIMAT0001538	rno-miR-429	Itpr1	25262	ENSRNOG00000007104	1	0	2	0	0	0	0	2	0	2
MIMAT0001538	rno-miR-429	Jazf1	685879	ENSRNOG00000027026	1	0	0	1	0	0	0	2	0	2
MIMAT0001538	rno-miR-429	Kcnd2	65180	ENSRNOG00000029610	1	0	1	0	0	0	0	2	0	2
MIMAT0001538	rno-miR-429	Kctd15	499129	ENSRNOG00000021137	1	0	0	1	0	0	0	2	0	2
MIMAT0001538	rno-miR-429	Khdrbs1	117268	ENSRNOG00000046794	1	0	0	1	0	0	0	2	0	2
MIMAT0001538	rno-miR-429	Klf4	114505	ENSRNOG00000016299	1	0	1	0	0	0	0	2	0	2
MIMAT0001538	rno-miR-429	Lhfp	499615	ENSRNOG00000014153	2	0	0	1	0	0	0	2	0	2
MIMAT0001538	rno-miR-429	LOC100125362	100125362	ENSRNOG00000025463	2	0	0	1	0	0	0	2	0	2
MIMAT0001538	rno-miR-429	LOC100360260	297093	ENSRNOG00000011814	1	0	1	0	0	0	0	2	0	2
MIMAT0001538	rno-miR-429	LOC100360453	297093	ENSRNOG00000011814	1	0	1	0	0	0	0	2	0	2
MIMAT0001538	rno-miR-429	LOC100910831	361712	ENSRNOG00000020950	1	1	0	0	0	0	0	2	0	2
MIMAT0001538	rno-miR-429	LOC100911280	100911280	ENSRNOG00000000940	1	1	0	0	0	0	0	2	0	2
MIMAT0001538	rno-miR-429	LOC100912163	84481	ENSRNOG00000016391	1	0	1	0	0	0	0	2	0	2
MIMAT0001538	rno-miR-429	LOC364561	298696	ENSRNOG00000020474	1	1	0	0	0	0	0	2	0	2
MIMAT0001538	rno-miR-429	LOC498350	498350	ENSRNOG00000002085	0	1	1	0	0	0	0	2	0	2
MIMAT0001538	rno-miR-429	LOC498369	303554	ENSRNOG00000020730	1	0	1	0	0	0	0	2	0	2
MIMAT0001538	rno-miR-429	Lpar1	116744	ENSRNOG00000013656	2	0	0	1	0	0	0	2	0	2
MIMAT0001538	rno-miR-429	Mapk9	50658	ENSRNOG00000002823	1	0	2	0	0	0	0	2	0	2
MIMAT0001538	rno-miR-429	Matr3	29150	ENSRNOG00000019875	1	0	1	0	0	0	0	2	0	2
MIMAT0001538	rno-miR-429	Mboat2	313997	ENSRNOG00000061050	1	0	0	1	0	0	0	2	0	2
MIMAT0001538	rno-miR-429	Mgat2	94273	ENSRNOG00000004234	2	0	0	1	0	0	0	2	0	2
MIMAT0001538	rno-miR-429	Mgp	25333	ENSRNOG00000005695	0	1	1	0	0	0	0	2	0	2
MIMAT0001538	rno-miR-429	Mmd	303439	ENSRNOG00000002436	1	0	0	1	0	0	0	2	0	2
MIMAT0001538	rno-miR-429	Mmgt1	302864	ENSRNOG00000000881	1	0	0	1	0	0	0	2	0	2
MIMAT0001538	rno-miR-429	Mobp	25037	ENSRNOG00000018700	0	1	4	0	0	0	0	2	0	2
MIMAT0001538	rno-miR-429	Mospd2	363463	ENSRNOG00000003350	1	0	0	1	0	0	0	2	0	2
MIMAT0001538	rno-miR-429	Mprip	116504	ENSRNOG00000003226	1	0	0	1	0	0	0	2	0	2
MIMAT0001538	rno-miR-429	Mxd3	252915	ENSRNOG00000016539	1	1	0	0	0	0	0	2	0	2
MIMAT0001538	rno-miR-429	Nap1l5	688843	ENSRNOG00000007808	1	0	0	1	0	0	0	2	0	2
MIMAT0001538	rno-miR-429	Nbr1	303554	ENSRNOG00000020730	1	0	1	0	0	0	0	2	0	2
MIMAT0001538	rno-miR-429	Ndn	308690	ENSRNOG00000010146	1	0	1	0	0	0	0	2	0	2
MIMAT0001538	rno-miR-429	Ndst1	29633	ENSRNOG00000019014	1	0	0	1	0	0	0	2	0	2
MIMAT0001538	rno-miR-429	Nog	25495	ENSRNOG00000023683	1	1	0	0	0	0	0	2	0	2
MIMAT0001538	rno-miR-429	Nptx1	266777	ENSRNOG00000003741	1	0	1	0	0	0	0	2	0	2
MIMAT0001538	rno-miR-429	Nr3c1		ENSRNOG00000014096	2	0	0	1	0	0	0	2	0	2
MIMAT0001538	rno-miR-429	Nrg1	112400	ENSRNOG00000010392	2	0	6	0	0	0	0	2	0	2
MIMAT0001538	rno-miR-429	Nudt4	94267	ENSRNOG00000009094	1	0	1	0	0	0	0	2	0	2
MIMAT0001538	rno-miR-429	Nup107	116555	ENSRNOG00000006541	1	0	0	1	0	0	0	2	0	2
MIMAT0001538	rno-miR-429	Nxph1	25501	ENSRNOG00000008939	1	0	1	0	0	0	0	2	0	2
MIMAT0001538	rno-miR-429	Osbpl11	303888	ENSRNOG00000001782	1	0	0	1	0	0	0	2	0	2
MIMAT0001538	rno-miR-429	Paqr3	305203	ENSRNOG00000002035	1	1	0	0	0	0	0	2	0	2
MIMAT0001538	rno-miR-429	Pcdh7	360942	ENSRNOG00000012367	0	1	1	0	0	0	0	2	0	2
MIMAT0001538	rno-miR-429	Pdcd10	494345	ENSRNOG00000010147	1	1	0	0	0	0	0	2	0	2
MIMAT0001538	rno-miR-429	Pin1	298696	ENSRNOG00000020474	1	1	0	0	0	0	0	2	0	2
MIMAT0001538	rno-miR-429	Plac1	317316	ENSRNOG00000002379	0	1	1	0	0	0	0	2	0	2
MIMAT0001538	rno-miR-429	Plcl1	84587	ENSRNOG00000032659	0	0	1	1	0	0	0	2	0	2
MIMAT0001538	rno-miR-429	Plk2	83722	ENSRNOG00000011951	1	0	1	0	0	0	0	2	0	2
MIMAT0001538	rno-miR-429	Polk	171525	ENSRNOG00000060626	2	2	0	0	0	0	0	2	0	2
MIMAT0001538	rno-miR-429	Ppap2b	192270	ENSRNOG00000008116	1	0	2	0	0	0	0	2	0	2
MIMAT0001538	rno-miR-429	Ppp1r9b	84686	ENSRNOG00000052113	1	0	0	1	0	0	0	2	0	2
MIMAT0001538	rno-miR-429	Ppp4r2	297486	ENSRNOG00000024647	1	0	0	1	0	0	0	2	0	2
MIMAT0001538	rno-miR-429	Psip1	313323	ENSRNOG00000011498	1	0	1	0	0	0	0	2	0	2
MIMAT0001538	rno-miR-429	Ptpn13	498331	ENSRNOG00000002061	2	0	0	1	0	0	0	2	0	2
MIMAT0001538	rno-miR-429	Rab21	299799	ENSRNOG00000003923	1	0	1	0	0	0	0	2	0	2
MIMAT0001538	rno-miR-429	Rap2c	302495	ENSRNOG00000002529	2	0	0	1	0	0	0	2	0	2
MIMAT0001538	rno-miR-429	Rbfox1	302920	ENSRNOG00000002827	1	0	0	1	0	0	0	2	0	2
MIMAT0001538	rno-miR-429	Reln	24718	ENSRNOG00000021441	2	1	0	0	0	0	0	2	0	2
MIMAT0001538	rno-miR-429	RGD1304810	306504	ENSRNOG00000011253	1	0	0	1	0	0	0	2	0	2
MIMAT0001538	rno-miR-429	RGD1306227	310377	ENSRNOG00000017581	0	1	1	0	0	0	0	2	0	2
MIMAT0001538	rno-miR-429	RGD1560108	499309	ENSRNOG00000032042	1	1	0	0	0	0	0	2	0	2
MIMAT0001538	rno-miR-429	RGD1562161	501559	ENSRNOG00000005135	1	0	0	1	0	0	0	2	0	2
MIMAT0001538	rno-miR-429	Robo2	84409	ENSRNOG00000029598	1	0	0	1	0	0	0	2	0	2
MIMAT0001538	rno-miR-429	Rtcd1	295395	ENSRNOG00000014575	0	1	1	0	0	0	0	2	0	2
MIMAT0001538	rno-miR-429	Sec24a	287275	ENSRNOG00000004563	1	0	0	1	0	0	0	2	0	2
MIMAT0001538	rno-miR-429	Sesn1	294518	ENSRNOG00000000302	1	0	0	1	0	0	0	2	0	2
MIMAT0001538	rno-miR-429	Skp2	294790	ENSRNOG00000059059	1	0	0	1	0	0	0	2	0	2
MIMAT0001538	rno-miR-429	Slit2	360272	ENSRNOG00000003840	2	0	0	1	0	0	0	2	0	2
MIMAT0001538	rno-miR-429	Slitrk1	306147	ENSRNOG00000009209	1	0	0	1	0	0	0	2	0	2
MIMAT0001538	rno-miR-429	Smarcad1	312398	ENSRNOG00000006391	1	0	0	1	0	0	0	2	0	2
MIMAT0001538	rno-miR-429	Spats2l	316426	ENSRNOG00000016012	1	1	0	0	0	0	0	2	0	2
MIMAT0001538	rno-miR-429	Srsf1	689890	ENSRNOG00000050323	2	0	0	1	0	0	0	2	0	2
MIMAT0001538	rno-miR-429	St3gal2	64442	ENSRNOG00000017932	1	0	1	0	0	0	0	2	0	2
MIMAT0001538	rno-miR-429	St3gal6	304023	ENSRNOG00000001653	1	0	1	0	0	0	0	2	0	2
MIMAT0001538	rno-miR-429	Supt20	361946	ENSRNOG00000059480	2	1	0	0	0	0	0	2	0	2
MIMAT0001538	rno-miR-429	Syvn1	361712	ENSRNOG00000020950	1	1	0	0	0	0	0	2	0	2
MIMAT0001538	rno-miR-429	Tbk1	299827	ENSRNOG00000005528	1	0	0	1	0	0	0	2	0	2
MIMAT0001538	rno-miR-429	Tceb1	64525	ENSRNOG00000031730	0	0	1	1	0	0	0	2	0	2
MIMAT0001538	rno-miR-429	Tfap2a	306862	ENSRNOG00000015522	1	0	0	1	0	0	0	2	0	2
MIMAT0001538	rno-miR-429	Tnfrsf11b	25341	ENSRNOG00000008336	1	0	1	0	0	0	0	2	0	2
MIMAT0001538	rno-miR-429	Trim33	365894	ENSRNOG00000018946	1	0	0	1	0	0	0	2	0	2
MIMAT0001538	rno-miR-429	Tsc22d2	499624	ENSRNOG00000038044	1	0	0	1	0	0	0	2	0	2
MIMAT0001538	rno-miR-429	Twistnb	362728	ENSRNOG00000010750	2	0	0	1	0	0	0	2	0	2
MIMAT0001538	rno-miR-429	Ube2i	25573	ENSRNOG00000017907	1	0	1	0	0	0	0	2	0	2
MIMAT0001538	rno-miR-429	Vldlr	25696	ENSRNOG00000027491	1	1	0	0	0	0	0	2	0	2
MIMAT0001538	rno-miR-429	Wdfy3	305164	ENSRNOG00000061121	1	0	0	1	0	0	0	2	0	2
MIMAT0001538	rno-miR-429	Xkr4	297801	ENSRNOG00000027276	1	0	1	0	0	0	0	2	0	2
MIMAT0001538	rno-miR-429	Zc3h4	678741	ENSRNOG00000015229	1	1	0	0	0	0	0	2	0	2
MIMAT0001538	rno-miR-429	Zcchc24	361104	ENSRNOG00000040205	1	0	0	1	0	0	0	2	0	2
MIMAT0001538	rno-miR-429	Zeb2	311071	ENSRNOG00000004677	0	0	0	0	1	1	0	0	2	2
MIMAT0001538	rno-miR-429	Zfand6	293067	ENSRNOG00000013506	2	0	1	0	0	0	0	2	0	2
MIMAT0001538	rno-miR-429	Zfp532	307362	ENSRNOG00000017116	2	0	0	1	0	0	0	2	0	2
MIMAT0005280	rno-miR-743b-3p	Apln	58812	ENSRNOG00000003984	0	0	1	1	0	0	0	2	0	2
MIMAT0005280	rno-miR-743b-3p	B4galt6	65196	ENSRNOG00000015895	0	0	1	1	0	0	0	2	0	2
MIMAT0005280	rno-miR-743b-3p	Bax	24887	ENSRNOG00000020876	0	1	1	0	0	0	0	2	0	2
MIMAT0005280	rno-miR-743b-3p	Brinp3	286901	ENSRNOG00000002811	0	0	1	1	0	0	0	2	0	2
MIMAT0005280	rno-miR-743b-3p	Btrc	361765	ENSRNOG00000016280	0	1	1	0	0	0	0	2	0	2
MIMAT0005280	rno-miR-743b-3p	Cast	25403	ENSRNOG00000010286	0	0	1	1	0	0	0	2	0	2
MIMAT0005280	rno-miR-743b-3p	Chic2	83835	ENSRNOG00000002267	1	1	0	0	0	0	0	2	0	2
MIMAT0005280	rno-miR-743b-3p	Cldnd1	288182	ENSRNOG00000001657	0	0	1	1	0	0	0	2	0	2
MIMAT0005280	rno-miR-743b-3p	Clta	83800	ENSRNOG00000014635	0	0	2	1	0	0	0	2	0	2
MIMAT0005280	rno-miR-743b-3p	Cxcl1	81503	ENSRNOG00000002802	0	1	1	0	0	0	0	2	0	2
MIMAT0005280	rno-miR-743b-3p	Dek	306817	ENSRNOG00000016152	0	0	1	1	0	0	0	2	0	2
MIMAT0005280	rno-miR-743b-3p	Dr1	289881	ENSRNOG00000048308	0	0	1	1	0	0	0	2	0	2
MIMAT0005280	rno-miR-743b-3p	Dync1li2	81655	ENSRNOG00000025791	0	0	1	1	0	0	0	2	0	2
MIMAT0005280	rno-miR-743b-3p	Ebf1	116543	ENSRNOG00000028845	0	0	1	1	0	0	0	2	0	2
MIMAT0005280	rno-miR-743b-3p	Errfi1	313729	ENSRNOG00000058186	0	0	1	1	0	0	0	2	0	2
MIMAT0005280	rno-miR-743b-3p	Glra2	24397	ENSRNOG00000003313	0	0	1	1	0	0	0	2	0	2
MIMAT0005280	rno-miR-743b-3p	Grk5	59075	ENSRNOG00000011439	0	0	1	1	0	0	0	2	0	2
MIMAT0005280	rno-miR-743b-3p	Igf1	24482	ENSRNOG00000004517	0	0	3	2	0	0	0	2	0	2
MIMAT0005280	rno-miR-743b-3p	Il13ra1	252963	ENSRNOG00000013170	0	0	1	1	0	0	0	2	0	2
MIMAT0005280	rno-miR-743b-3p	Insig2	288985	ENSRNOG00000002478	0	1	1	0	0	0	0	2	0	2
MIMAT0005280	rno-miR-743b-3p	Ispd	493574	ENSRNOG00000006199	0	1	0	1	0	0	0	2	0	2
MIMAT0005280	rno-miR-743b-3p	LOC100360218	252963	ENSRNOG00000013170	0	0	1	1	0	0	0	2	0	2
MIMAT0005280	rno-miR-743b-3p	LOC680385	81783	ENSRNOG00000011606	0	1	2	0	0	0	0	2	0	2
MIMAT0005280	rno-miR-743b-3p	Map2k1	170851	ENSRNOG00000010176	0	0	1	1	0	0	0	2	0	2
MIMAT0005280	rno-miR-743b-3p	Mapre3	298848	ENSRNOG00000008961	0	0	1	1	0	0	0	2	0	2
MIMAT0005280	rno-miR-743b-3p	Mier1	313418	ENSRNOG00000007175	1	0	0	1	0	0	0	2	0	2
MIMAT0005280	rno-miR-743b-3p	Pip5k1b	309419	ENSRNOG00000015232	0	0	1	1	0	0	0	2	0	2
MIMAT0005280	rno-miR-743b-3p	Prl7a3	64361	ENSRNOG00000016616	0	1	1	0	0	0	0	2	0	2
MIMAT0005280	rno-miR-743b-3p	Prl7a4	306929	ENSRNOG00000029126	0	1	2	0	0	0	0	2	0	2
MIMAT0005280	rno-miR-743b-3p	Prpf4b	291078	ENSRNOG00000016705	1	0	1	0	0	0	0	2	0	2
MIMAT0005280	rno-miR-743b-3p	Sec31a	93646	ENSRNOG00000002251	0	2	2	0	0	0	0	2	0	2
MIMAT0005280	rno-miR-743b-3p	Slc35g2	315957	ENSRNOG00000015370	0	1	1	0	0	0	0	2	0	2
MIMAT0005280	rno-miR-743b-3p	Ssb	81783	ENSRNOG00000007998	0	2	2	0	0	0	0	2	0	2
MIMAT0005280	rno-miR-743b-3p	Stx7	60466	ENSRNOG00000015670	0	0	1	1	0	0	0	2	0	2
MIMAT0005280	rno-miR-743b-3p	Tmem168	312135	ENSRNOG00000057290	0	0	1	1	0	0	0	2	0	2
MIMAT0005280	rno-miR-743b-3p	Tmem55a	362490	ENSRNOG00000006697	0	0	1	1	0	0	0	2	0	2
MIMAT0005280	rno-miR-743b-3p	Ube2j2	298689	ENSRNOG00000019749	0	1	0	1	0	0	0	2	0	2
MIMAT0005289	rno-miR-881-3p	Bhmt	81508	ENSRNOG00000011200	0	0	1	1	0	0	0	2	0	2
MIMAT0005289	rno-miR-881-3p	Cry1	299691	ENSRNOG00000006622	0	2	1	0	0	0	0	2	0	2
MIMAT0005289	rno-miR-881-3p	Csn3	29188	ENSRNOG00000001951	0	1	1	0	0	0	0	2	0	2
MIMAT0005289	rno-miR-881-3p	Galk2	296117	ENSRNOG00000009289	0	1	1	0	0	0	0	2	0	2
MIMAT0005289	rno-miR-881-3p	Polr1c	301246	ENSRNOG00000019079	0	1	1	0	0	0	0	2	0	2
MIMAT0005289	rno-miR-881-3p	Zscan21	304342	ENSRNOG00000039234	0	1	1	0	0	0	0	2	0	2
MIMAT0005318	rno-miR-471-5p	Apool	317191	ENSRNOG00000004512	0	1	1	0	0	0	0	2	0	2
MIMAT0005318	rno-miR-471-5p	Cyb5a	64001	ENSRNOG00000015205	0	1	1	0	0	0	0	2	0	2
MIMAT0012835	rno-miR-615	Ngfr	24596	ENSRNOG00000005392	0	0	1	1	0	0	0	2	0	2
MIMAT0012850	rno-miR-465-5p	Adnp	64622	ENSRNOG00000010975	1	0	1	0	0	0	0	2	0	2
MIMAT0012850	rno-miR-465-5p	Batf	299206	ENSRNOG00000008588	1	0	0	1	0	0	0	2	0	2
MIMAT0012850	rno-miR-465-5p	Bloc1s2	293938	ENSRNOG00000012684	1	0	1	0	0	0	0	2	0	2
MIMAT0012850	rno-miR-465-5p	Cbfb	361391	ENSRNOG00000014647	1	0	1	0	0	0	0	2	0	2
MIMAT0012850	rno-miR-465-5p	Cbx8	303731	ENSRNOG00000048113	1	0	1	0	0	0	0	2	0	2
MIMAT0012850	rno-miR-465-5p	Cfap20	307642	ENSRNOG00000042179	1	0	1	0	0	0	0	2	0	2
MIMAT0012850	rno-miR-465-5p	Cltc	54241	ENSRNOG00000004291	1	0	1	0	0	0	0	2	0	2
MIMAT0012850	rno-miR-465-5p	Cpne8	362988	ENSRNOG00000026128	1	0	0	1	0	0	0	2	0	2
MIMAT0012850	rno-miR-465-5p	Cyp26a1	154985	ENSRNOG00000016750	1	0	1	0	0	0	0	2	0	2
MIMAT0012850	rno-miR-465-5p	Dazap2	300235	ENSRNOG00000004628	1	0	1	0	0	0	0	2	0	2
MIMAT0012850	rno-miR-465-5p	Depdc7	295971	ENSRNOG00000012262	1	0	1	0	0	0	0	2	0	2
MIMAT0012850	rno-miR-465-5p	Dgkb	54248	ENSRNOG00000030771	1	0	0	1	0	0	0	2	0	2
MIMAT0012850	rno-miR-465-5p	Eif2ak3	29702	ENSRNOG00000006069	1	0	1	0	0	0	0	2	0	2
MIMAT0012850	rno-miR-465-5p	Fam122a	309420	ENSRNOG00000051051	1	0	1	0	0	0	0	2	0	2
MIMAT0012850	rno-miR-465-5p	Far1	293173	ENSRNOG00000013176	1	0	1	0	0	0	0	2	0	2
MIMAT0012850	rno-miR-465-5p	Gabrb3	24922	ENSRNOG00000014938	1	0	1	0	0	0	0	2	0	2
MIMAT0012850	rno-miR-465-5p	Grik1	29559	ENSRNOG00000001575	1	0	1	0	0	0	0	2	0	2
MIMAT0012850	rno-miR-465-5p	H2afz	58940	ENSRNOG00000010306	1	0	1	0	0	0	0	2	0	2
MIMAT0012850	rno-miR-465-5p	Hopx	171160	ENSRNOG00000024689	1	0	1	0	0	0	0	2	0	2
MIMAT0012850	rno-miR-465-5p	Hspa4	266759	ENSRNOG00000016596	1	0	1	0	0	0	0	2	0	2
MIMAT0012850	rno-miR-465-5p	Ints5	309200	ENSRNOG00000026005	1	0	0	1	0	0	0	2	0	2
MIMAT0012850	rno-miR-465-5p	Khdrbs2	170843	ENSRNOG00000012284	1	0	1	0	0	0	0	2	0	2
MIMAT0012850	rno-miR-465-5p	LOC100909709	89821	ENSRNOG00000054902	1	0	1	0	0	0	0	2	0	2
MIMAT0012850	rno-miR-465-5p	Lyn	81515	ENSRNOG00000008180	1	0	0	1	0	0	0	2	0	2
MIMAT0012850	rno-miR-465-5p	Mark3	170577	ENSRNOG00000010330	1	0	1	0	0	0	0	2	0	2
MIMAT0012850	rno-miR-465-5p	Mdh1	24551	ENSRNOG00000008103	1	0	1	0	0	0	0	2	0	2
MIMAT0012850	rno-miR-465-5p	Mfsd6	301388	ENSRNOG00000012663	1	0	0	1	0	0	0	2	0	2
MIMAT0012850	rno-miR-465-5p	Morf4l2	317413	ENSRNOG00000002389	1	0	3	0	0	0	0	2	0	2
MIMAT0012850	rno-miR-465-5p	Msl3	317464	ENSRNOG00000004016	2	0	2	0	0	0	0	2	0	2
MIMAT0012850	rno-miR-465-5p	Naa30	498489	ENSRNOG00000014192	1	0	0	1	0	0	0	2	0	2
MIMAT0012850	rno-miR-465-5p	Nup205	362335	ENSRNOG00000010852	1	0	0	1	0	0	0	2	0	2
MIMAT0012850	rno-miR-465-5p	Oaz1	25502	ENSRNOG00000019459	1	0	1	0	0	0	0	2	0	2
MIMAT0012850	rno-miR-465-5p	Os9	362891	ENSRNOG00000025570	1	0	1	0	0	0	0	2	0	2
MIMAT0012850	rno-miR-465-5p	Pnrc1	286988	ENSRNOG00000007793	2	0	1	0	0	0	0	2	0	2
MIMAT0012850	rno-miR-465-5p	Ptbp3	83515	ENSRNOG00000016334	0	0	1	1	0	0	0	2	0	2
MIMAT0012850	rno-miR-465-5p	Rarres1	310486	ENSRNOG00000037853	1	0	0	1	0	0	0	2	0	2
MIMAT0012850	rno-miR-465-5p	Rev3l	309812	ENSRNOG00000000593	1	0	0	1	0	0	0	2	0	2
MIMAT0012850	rno-miR-465-5p	Rraga	117044	ENSRNOG00000007051	1	0	1	0	0	0	0	2	0	2
MIMAT0012850	rno-miR-465-5p	Rras2	365355	ENSRNOG00000012258	1	0	1	0	0	0	0	2	0	2
MIMAT0012850	rno-miR-465-5p	Rsbn1	310749	ENSRNOG00000019671	2	0	0	1	0	0	0	2	0	2
MIMAT0012850	rno-miR-465-5p	Scn9a	78956	ENSRNOG00000006639	1	0	0	1	0	0	0	2	0	2
MIMAT0012850	rno-miR-465-5p	Slc30a1	58976	ENSRNOG00000004749	1	0	1	0	0	0	0	2	0	2
MIMAT0012850	rno-miR-465-5p	Slc39a6	291733	ENSRNOG00000028703	1	0	1	0	0	0	0	2	0	2
MIMAT0012850	rno-miR-465-5p	Sp4	25162	ENSRNOG00000005472	0	0	1	1	0	0	0	2	0	2
MIMAT0012850	rno-miR-465-5p	Srrm1	313620	ENSRNOG00000018194	1	0	0	1	0	0	0	2	0	2
MIMAT0012850	rno-miR-465-5p	Srsf10	362630	ENSRNOG00000007992	1	0	1	0	0	0	0	2	0	2
MIMAT0012850	rno-miR-465-5p	Stag2	313304	ENSRNOG00000029885	3	0	0	1	0	0	0	2	0	2
MIMAT0012850	rno-miR-465-5p	Tacc2	309025	ENSRNOG00000020457	1	0	0	1	0	0	0	2	0	2
MIMAT0012850	rno-miR-465-5p	Thoc2	313308	ENSRNOG00000007315	1	0	0	1	0	0	0	2	0	2
MIMAT0012850	rno-miR-465-5p	Tjp1	292994	ENSRNOG00000011077	1	0	0	1	0	0	0	2	0	2
MIMAT0012850	rno-miR-465-5p	Tmtc3	314785	ENSRNOG00000006749	2	0	0	1	0	0	0	2	0	2
MIMAT0012850	rno-miR-465-5p	Tra2b	117259	ENSRNOG00000001783	0	0	1	1	0	0	0	2	0	2
MIMAT0012850	rno-miR-465-5p	Trak2	171086	ENSRNOG00000010881	1	0	0	1	0	0	0	2	0	2
MIMAT0012850	rno-miR-465-5p	Trpc1	89821	ENSRNOG00000054902	1	0	1	0	0	0	0	2	0	2
MIMAT0012850	rno-miR-465-5p	Twist1	85489	ENSRNOG00000011101	1	0	1	0	0	0	0	2	0	2
MIMAT0012850	rno-miR-465-5p	Ube2s	292588	ENSRNOG00000016930	1	0	0	1	0	0	0	2	0	2
MIMAT0012850	rno-miR-465-5p	Vta1	292640	ENSRNOG00000011540	1	0	0	1	0	0	0	2	0	2
MIMAT0012850	rno-miR-465-5p	Vwc2	501231	ENSRNOG00000049076	1	0	0	1	0	0	0	2	0	2
MIMAT0012850	rno-miR-465-5p	Wdr45	302559	ENSRNOG00000009749	1	0	1	0	0	0	0	2	0	2
MIMAT0012850	rno-miR-465-5p	Zbtb20	288105	ENSRNOG00000056716	1	0	0	1	0	0	0	2	0	2
MIMAT0012850	rno-miR-465-5p	Zfp655	360764	ENSRNOG00000060129	1	0	1	0	0	0	0	2	0	2
MIMAT0012850	rno-miR-465-5p	Zmiz1	361103	ENSRNOG00000010488	1	0	0	1	0	0	0	2	0	2
MIMAT0017162	rno-miR-218a-1-3p	Acvr2a	29263	ENSRNOG00000005334	1	0	0	1	0	0	0	2	0	2
MIMAT0017162	rno-miR-218a-1-3p	Nup153	25281	ENSRNOG00000001456	1	0	0	1	0	0	0	2	0	2
MIMAT0017162	rno-miR-218a-1-3p	Rfx7	315804	ENSRNOG00000060367	1	0	0	1	0	0	0	2	0	2
MIMAT0017162	rno-miR-218a-1-3p	Srsf11	502603	ENSRNOG00000029592	1	0	0	1	0	0	0	2	0	2
MIMAT0017162	rno-miR-218a-1-3p	Tacc1	306562	ENSRNOG00000016423	1	0	0	1	0	0	0	2	0	2
MIMAT0017795	rno-miR-3541	Atp8b2	685152	ENSRNOG00000020822	1	0	0	1	0	0	0	2	0	2
MIMAT0017795	rno-miR-3541	Brd2	100909544	ENSRNOG00000000461	1	0	0	1	0	0	0	2	0	2
MIMAT0017795	rno-miR-3541	Cdc37l1	293886	ENSRNOG00000010967	1	0	0	1	0	0	0	2	0	2
MIMAT0017795	rno-miR-3541	Cyr61	83476	ENSRNOG00000014350	1	0	0	1	0	0	0	2	0	2
MIMAT0017795	rno-miR-3541	Dlg4	29495	ENSRNOG00000018526	1	0	0	1	0	0	0	2	0	2
MIMAT0017795	rno-miR-3541	Eif3j	691947	ENSRNOG00000016459	1	0	0	1	0	0	0	2	0	2
MIMAT0017795	rno-miR-3541	Gabarapl1	689161	ENSRNOG00000053362	1	0	0	1	0	0	0	2	0	2
MIMAT0017795	rno-miR-3541	Has3	266805	ENSRNOG00000059362	1	0	0	1	0	0	0	2	0	2
MIMAT0017795	rno-miR-3541	Ilk	170922	ENSRNOG00000018993	1	0	0	1	0	0	0	2	0	2
MIMAT0017795	rno-miR-3541	Lin54	305171	ENSRNOG00000002203	1	0	0	1	0	0	0	2	0	2
MIMAT0017795	rno-miR-3541	Med1	497991	ENSRNOG00000005606	1	0	0	1	0	0	0	2	0	2
MIMAT0017795	rno-miR-3541	Pde7a	81744	ENSRNOG00000013048	1	0	0	1	0	0	0	2	0	2
MIMAT0017795	rno-miR-3541	Pdzd4	293856	ENSRNOG00000056174	1	0	0	1	0	0	0	2	0	2
MIMAT0017795	rno-miR-3541	Sorbs3	282843	ENSRNOG00000008829	1	0	0	1	0	0	0	2	0	2
MIMAT0017795	rno-miR-3541	Suco	360863	ENSRNOG00000026542	1	0	0	1	0	0	0	2	0	2
MIMAT0017795	rno-miR-3541	Tcf20	366964	ENSRNOG00000009585	2	0	0	1	0	0	0	2	0	2
MIMAT0017795	rno-miR-3541	Tnpo2	304670	ENSRNOG00000003970	1	0	0	1	0	0	0	2	0	2
MIMAT0017795	rno-miR-3541	Tnrc6b	192178	ENSRNOG00000024907	1	0	0	1	0	0	0	2	0	2
MIMAT0017795	rno-miR-3541	Vav2	296603	ENSRNOG00000007422	1	0	0	1	0	0	0	2	0	2
MIMAT0017795	rno-miR-3541	Wt1	24883	ENSRNOG00000013074	1	0	0	1	0	0	0	2	0	2
MIMAT0017822	rno-miR-291b	Acsl4	113976	ENSRNOG00000019180	1	0	0	1	0	0	0	2	0	2
MIMAT0017822	rno-miR-291b	Ago1	313594	ENSRNOG00000055915	1	0	0	1	0	0	0	2	0	2
MIMAT0017822	rno-miR-291b	Ankib1	368062	ENSRNOG00000005502	1	0	0	1	0	0	0	2	0	2
MIMAT0017822	rno-miR-291b	Arhgap1	311193	ENSRNOG00000016610	1	0	0	1	0	0	0	2	0	2
MIMAT0017822	rno-miR-291b	Arhgap12	307016	ENSRNOG00000017791	1	0	0	1	0	0	0	2	0	2
MIMAT0017822	rno-miR-291b	Arhgap24	305156	ENSRNOG00000056944	1	0	0	1	0	0	0	2	0	2
MIMAT0017822	rno-miR-291b	Atg16l1	363278	ENSRNOG00000017913	1	0	0	1	0	0	0	2	0	2
MIMAT0017822	rno-miR-291b	Atrn	83526	ENSRNOG00000021240	1	0	0	1	0	0	0	2	0	2
MIMAT0017822	rno-miR-291b	Blcap	171113	ENSRNOG00000024437	1	0	0	1	0	0	0	2	0	2
MIMAT0017822	rno-miR-291b	Bmpr2	140590	ENSRNOG00000022196	1	0	0	1	0	0	0	2	0	2
MIMAT0017822	rno-miR-291b	Btf3l4	366434	ENSRNOG00000008512	1	0	0	2	0	0	0	2	0	2
MIMAT0017822	rno-miR-291b	Btg3	54230	ENSRNOG00000001555	1	0	0	1	0	0	0	2	0	2
MIMAT0017822	rno-miR-291b	Cdk2	362817	ENSRNOG00000006469	1	0	0	1	0	0	0	2	0	2
MIMAT0017822	rno-miR-291b	Clcn4	60586	ENSRNOG00000003533	1	0	0	1	0	0	0	2	0	2
MIMAT0017822	rno-miR-291b	Cmpk1	298410	ENSRNOG00000007775	1	0	0	1	0	0	0	2	0	2
MIMAT0017822	rno-miR-291b	Cnot6l	360917	ENSRNOG00000002075	1	0	0	1	0	0	0	2	0	2
MIMAT0017822	rno-miR-291b	Cnot7	306492	ENSRNOG00000012263	1	0	0	1	0	0	0	2	0	2
MIMAT0017822	rno-miR-291b	Cpeb1	293056	ENSRNOG00000019161	1	0	0	1	0	0	0	2	0	2
MIMAT0017822	rno-miR-291b	Cul3	301555	ENSRNOG00000015633	1	0	0	1	0	0	0	2	0	2
MIMAT0017822	rno-miR-291b	Dnajb9	24908	ENSRNOG00000004006	1	0	0	1	0	0	0	2	0	2
MIMAT0017822	rno-miR-291b	Eea1	314764	ENSRNOG00000021681	1	0	0	1	0	0	0	2	0	2
MIMAT0017822	rno-miR-291b	Elk4	304786	ENSRNOG00000007887	3	0	0	1	0	0	0	2	0	2
MIMAT0017822	rno-miR-291b	Emx2	499380	ENSRNOG00000009482	1	0	0	1	0	0	0	2	0	2
MIMAT0017822	rno-miR-291b	Epha4	316539	ENSRNOG00000013213	1	0	0	1	0	0	0	2	0	2
MIMAT0017822	rno-miR-291b	Epha5	79208	ENSRNOG00000002024	1	0	0	1	0	0	0	2	0	2
MIMAT0017822	rno-miR-291b	Fam73b	296623	ENSRNOG00000017513	2	0	0	1	0	0	0	2	0	2
MIMAT0017822	rno-miR-291b	Fbxl5	305424	ENSRNOG00000005261	1	0	0	1	0	0	0	2	0	2
MIMAT0017822	rno-miR-291b	Fbxo48	364205	ENSRNOG00000023026	1	0	0	1	0	0	0	2	0	2
MIMAT0017822	rno-miR-291b	Fcho2	309129	ENSRNOG00000015334	1	0	0	1	0	0	0	2	0	2
MIMAT0017822	rno-miR-291b	Fibin	499856	ENSRNOG00000004699	1	0	0	1	0	0	0	2	0	2
MIMAT0017822	rno-miR-291b	Gca	295647	ENSRNOG00000007359	1	0	0	1	0	0	0	2	0	2
MIMAT0017822	rno-miR-291b	Hivep2	29721	ENSRNOG00000011015	1	0	0	1	0	0	0	2	0	2
MIMAT0017822	rno-miR-291b	Jakmip1	305434	ENSRNOG00000004998	1	0	0	1	0	0	0	2	0	2
MIMAT0017822	rno-miR-291b	Kbtbd2	312372	ENSRNOG00000013809	1	0	0	1	0	0	0	2	0	2
MIMAT0017822	rno-miR-291b	Kdm2a	361700	ENSRNOG00000019145	2	0	0	1	0	0	0	2	0	2
MIMAT0017822	rno-miR-291b	Kif23	315740	ENSRNOG00000014080	1	0	0	1	0	0	0	2	0	2
MIMAT0017822	rno-miR-291b	Klhl20	304920	ENSRNOG00000002875	1	0	0	1	0	0	0	2	0	2
MIMAT0017822	rno-miR-291b	Laptm4a	298875	ENSRNOG00000006865	1	0	0	1	0	0	0	2	0	2
MIMAT0017822	rno-miR-291b	Lmx1a	289201	ENSRNOG00000004642	1	0	0	1	0	0	0	2	0	2
MIMAT0017822	rno-miR-291b	Lpgat1	679692	ENSRNOG00000004402	1	0	0	1	0	0	0	2	0	2
MIMAT0017822	rno-miR-291b	Lzic	366507	ENSRNOG00000016200	1	0	0	1	0	0	0	2	0	2
MIMAT0017822	rno-miR-291b	Map3k12	25579	ENSRNOG00000015134	2	0	0	1	0	0	0	2	0	2
MIMAT0017822	rno-miR-291b	Map3k2	171492	ENSRNOG00000014089	1	0	0	1	0	0	0	2	0	2
MIMAT0017822	rno-miR-291b	Map3k8	116596	ENSRNOG00000016378	1	0	0	1	0	0	0	2	0	2
MIMAT0017822	rno-miR-291b	Mapre1	114764	ENSRNOG00000011798	1	0	0	1	0	0	0	2	0	2
MIMAT0017822	rno-miR-291b	Mtmr4	287607	ENSRNOG00000007496	2	0	0	1	0	0	0	2	0	2
MIMAT0017822	rno-miR-291b	Myocd	246297	ENSRNOG00000003669	1	0	0	1	0	0	0	2	0	2
MIMAT0017822	rno-miR-291b	Ndel1	170845	ENSRNOG00000004139	1	0	0	1	0	0	0	2	0	2
MIMAT0017822	rno-miR-291b	Pdgfra	25267	ENSRNOG00000002244	1	0	0	1	0	0	0	2	0	2
MIMAT0017822	rno-miR-291b	Pkia	114906	ENSRNOG00000012095	1	0	0	1	0	0	0	2	0	2
MIMAT0017822	rno-miR-291b	Polq	288079	ENSRNOG00000002471	2	0	0	1	0	0	0	2	0	2
MIMAT0017822	rno-miR-291b	Psd	171381	ENSRNOG00000019435	1	0	0	1	0	0	0	2	0	2
MIMAT0017822	rno-miR-291b	Pxk	306203	ENSRNOG00000008024	1	0	0	1	0	0	0	2	0	2
MIMAT0017822	rno-miR-291b	R3hdm1	304763	ENSRNOG00000004099	1	0	0	1	0	0	0	2	0	2
MIMAT0017822	rno-miR-291b	Rab10	50993	ENSRNOG00000047088	1	0	0	1	0	0	0	2	0	2
MIMAT0017822	rno-miR-291b	Rasl11b	305302	ENSRNOG00000002097	1	0	0	1	0	0	0	2	0	2
MIMAT0017822	rno-miR-291b	Rb1	24708	ENSRNOG00000016029	1	0	0	1	0	0	0	2	0	2
MIMAT0017822	rno-miR-291b	Sall3	364910	ENSRNOG00000026116	1	0	0	1	0	0	0	2	0	2
MIMAT0017822	rno-miR-291b	Sept2	117515	ENSRNOG00000017952	1	0	0	1	0	0	0	2	0	2
MIMAT0017822	rno-miR-291b	Slain1	361087	ENSRNOG00000024125	1	0	0	1	0	0	0	2	0	2
MIMAT0017822	rno-miR-291b	Slc25a10	170943	ENSRNOG00000036693	1	0	0	1	0	0	0	2	0	2
MIMAT0017822	rno-miR-291b	Slc40a1	170840	ENSRNOG00000003872	2	0	0	1	0	0	0	2	0	2
MIMAT0017822	rno-miR-291b	Smoc2	292401	ENSRNOG00000014166	1	0	0	1	0	0	0	2	0	2
MIMAT0017822	rno-miR-291b	Sos1	313845	ENSRNOG00000007106	1	0	0	1	0	0	0	2	0	2
MIMAT0017822	rno-miR-291b	Stk17b	170904	ENSRNOG00000012502	1	0	0	1	0	0	0	2	0	2
MIMAT0017822	rno-miR-291b	Stx6	60562	ENSRNOG00000003402	1	0	0	1	0	0	0	2	0	2
MIMAT0017822	rno-miR-291b	Sumf1	362409	ENSRNOG00000006813	1	0	0	1	0	0	0	2	0	2
MIMAT0017822	rno-miR-291b	Synm	308709	ENSRNOG00000014030	1	0	0	1	0	0	0	2	0	2
MIMAT0017822	rno-miR-291b	Tesk2	170908	ENSRNOG00000017282	1	0	0	1	0	0	0	2	0	2
MIMAT0017822	rno-miR-291b	Tnfrsf21	316256	ENSRNOG00000011517	1	0	0	1	0	0	0	2	0	2
MIMAT0017822	rno-miR-291b	Tp63	246334	ENSRNOG00000001924	1	0	0	1	0	0	0	2	0	2
MIMAT0017822	rno-miR-291b	Trim3	83616	ENSRNOG00000018356	1	0	0	1	0	0	0	2	0	2
MIMAT0017822	rno-miR-291b	Ube3a	361585	ENSRNOG00000015734	1	0	0	1	0	0	0	2	0	2
MIMAT0017822	rno-miR-291b	Usp3	363084	ENSRNOG00000017714	1	0	0	1	0	0	0	2	0	2
MIMAT0017822	rno-miR-291b	Usp32	303394	ENSRNOG00000027711	1	0	0	1	0	0	0	2	0	2
MIMAT0017822	rno-miR-291b	Wdr20	314453	ENSRNOG00000007333	1	0	0	1	0	0	0	2	0	2
MIMAT0017822	rno-miR-291b	Zfhx4	310250	ENSRNOG00000008765	1	0	0	1	0	0	0	2	0	2
MIMAT0017822	rno-miR-291b	Zfyve9	313477	ENSRNOG00000027183	1	0	0	1	0	0	0	2	0	2
MIMAT0017843	rno-miR-126b	Acap2	619382	ENSRNOG00000001730	1	0	0	1	0	0	0	2	0	2
MIMAT0017843	rno-miR-126b	Aff4	303132	ENSRNOG00000006965	2	0	0	1	0	0	0	2	0	2
MIMAT0017843	rno-miR-126b	Akap10	360540	ENSRNOG00000002899	1	0	0	1	0	0	0	2	0	2
MIMAT0017843	rno-miR-126b	Akirin2	297968	ENSRNOG00000008288	1	0	0	1	0	0	0	2	0	2
MIMAT0017843	rno-miR-126b	Ano1	309135	ENSRNOG00000020865	1	0	0	1	0	0	0	2	0	2
MIMAT0017843	rno-miR-126b	Ap1ar	362037	ENSRNOG00000024492	1	0	0	1	0	0	0	2	0	2
MIMAT0017843	rno-miR-126b	Arap2	305367	ENSRNOG00000056826	2	0	0	1	0	0	0	2	0	2
MIMAT0017843	rno-miR-126b	Ash1l	310638	ENSRNOG00000020386	1	0	0	1	0	0	0	2	0	2
MIMAT0017843	rno-miR-126b	B3galnt2	291212	ENSRNOG00000016855	1	0	0	1	0	0	0	2	0	2
MIMAT0017843	rno-miR-126b	Chd4	117535	ENSRNOG00000018309	1	0	0	1	0	0	0	2	0	2
MIMAT0017843	rno-miR-126b	Chsy1	292999	ENSRNOG00000012698	1	0	0	1	0	0	0	2	0	2
MIMAT0017843	rno-miR-126b	Cpne4	367160	ENSRNOG00000026577	1	0	0	1	0	0	0	2	0	2
MIMAT0017843	rno-miR-126b	Ctbp1	29382	ENSRNOG00000005428	1	0	0	1	0	0	0	2	0	2
MIMAT0017843	rno-miR-126b	Dynll2	140734	ENSRNOG00000008921	1	0	0	1	0	0	0	2	0	2
MIMAT0017843	rno-miR-126b	Eif5	295660	ENSRNOG00000010218	2	0	0	1	0	0	0	2	0	2
MIMAT0017843	rno-miR-126b	Etv5	303828	ENSRNOG00000001785	1	0	0	1	0	0	0	2	0	2
MIMAT0017843	rno-miR-126b	Fam168a	361614	ENSRNOG00000018873	1	0	0	1	0	0	0	2	0	2
MIMAT0017843	rno-miR-126b	Fam210a	307343	ENSRNOG00000016740	1	0	0	1	0	0	0	2	0	2
MIMAT0017843	rno-miR-126b	Gcc2	309798	ENSRNOG00000000823	1	0	0	1	0	0	0	2	0	2
MIMAT0017843	rno-miR-126b	Herc1	315771	ENSRNOG00000051671	2	0	0	1	0	0	0	2	0	2
MIMAT0017843	rno-miR-126b	Hmgn1	360704	ENSRNOG00000050978	1	0	0	1	0	0	0	2	0	2
MIMAT0017843	rno-miR-126b	Hmx3	293537	ENSRNOG00000020637	1	0	0	1	0	0	0	2	0	2
MIMAT0017843	rno-miR-126b	Hnrnpf	64200	ENSRNOG00000014562	1	0	0	1	0	0	0	2	0	2
MIMAT0017843	rno-miR-126b	Hnrnpul1	361522	ENSRNOG00000020683	1	0	0	1	0	0	0	2	0	2
MIMAT0017843	rno-miR-126b	Jmjd1c	171120	ENSRNOG00000000648	2	0	0	1	0	0	0	2	0	2
MIMAT0017843	rno-miR-126b	Jup	81679	ENSRNOG00000015380	1	0	0	1	0	0	0	2	0	2
MIMAT0017843	rno-miR-126b	Kdm5b	304809	ENSRNOG00000060544	1	0	0	1	0	0	0	2	0	2
MIMAT0017843	rno-miR-126b	Krit1	362317	ENSRNOG00000007937	1	0	0	1	0	0	0	2	0	2
MIMAT0017843	rno-miR-126b	LOC100911295	360704	ENSRNOG00000050978	1	0	0	1	0	0	0	2	0	2
MIMAT0017843	rno-miR-126b	Luc7l3	360602	ENSRNOG00000002835	1	0	0	1	0	0	0	2	0	2
MIMAT0017843	rno-miR-126b	Lurap1l	362535	ENSRNOG00000033740	1	0	0	1	0	0	0	2	0	2
MIMAT0017843	rno-miR-126b	Mbnl2	680445	ENSRNOG00000010737	1	0	0	1	0	0	0	2	0	2
MIMAT0017843	rno-miR-126b	Nfkbia	25493	ENSRNOG00000007390	1	0	0	1	0	0	0	2	0	2
MIMAT0017843	rno-miR-126b	Nfyb	25336	ENSRNOG00000010309	1	0	0	1	0	0	0	2	0	2
MIMAT0017843	rno-miR-126b	Pax6	25509	ENSRNOG00000004410	2	0	0	1	0	0	0	2	0	2
MIMAT0017843	rno-miR-126b	Plekha1	361659	ENSRNOG00000020497	2	0	0	1	0	0	0	2	0	2
MIMAT0017843	rno-miR-126b	Rab30	308821	ENSRNOG00000010224	1	0	0	1	0	0	0	2	0	2
MIMAT0017843	rno-miR-126b	Rab6b	363123	ENSRNOG00000009198	1	0	0	1	0	0	0	2	0	2
MIMAT0017843	rno-miR-126b	Rap1gds1	310909	ENSRNOG00000015987	1	0	0	1	0	0	0	2	0	2
MIMAT0017843	rno-miR-126b	RGD1559896	498967	ENSRNOG00000018836	1	0	0	1	0	0	0	2	0	2
MIMAT0017843	rno-miR-126b	Rnf6	304271	ENSRNOG00000000968	1	0	0	1	0	0	0	2	0	2
MIMAT0017843	rno-miR-126b	Siah1	140941	ENSRNOG00000015143	1	0	0	1	0	0	0	2	0	2
MIMAT0017843	rno-miR-126b	Slc2a1	24778	ENSRNOG00000007284	1	0	0	1	0	0	0	2	0	2
MIMAT0017843	rno-miR-126b	Slitrk6	290467	ENSRNOG00000022337	1	0	0	1	0	0	0	2	0	2
MIMAT0017843	rno-miR-126b	Spire1	307348	ENSRNOG00000025324	1	0	0	1	0	0	0	2	0	2
MIMAT0017843	rno-miR-126b	Ssh2	303342	ENSRNOG00000014285	1	0	0	1	0	0	0	2	0	2
MIMAT0017843	rno-miR-126b	Tbl1xr1	365755	ENSRNOG00000011216	2	0	0	1	0	0	0	2	0	2
MIMAT0017843	rno-miR-126b	Tmem123	363013	ENSRNOG00000010584	2	0	0	1	0	0	0	2	0	2
MIMAT0017843	rno-miR-126b	Tmem33	59303	ENSRNOG00000002254	1	0	0	1	0	0	0	2	0	2
MIMAT0017843	rno-miR-126b	Tra2a	500116	ENSRNOG00000009156	1	0	0	1	0	0	0	2	0	2
MIMAT0017843	rno-miR-126b	Usp47	308896	ENSRNOG00000026754	1	0	0	1	0	0	0	2	0	2
MIMAT0017843	rno-miR-126b	Wipf1	117538	ENSRNOG00000018406	1	0	0	1	0	0	0	2	0	2
MIMAT0017843	rno-miR-126b	Ywhah	25576	ENSRNOG00000055471	1	0	0	1	0	0	0	2	0	2
MIMAT0017843	rno-miR-126b	Zer1	311842	ENSRNOG00000025832	1	0	0	1	0	0	0	2	0	2
MIMAT0017893	rno-miR-3591	Lmo4	362051	ENSRNOG00000009205	1	0	0	1	0	0	0	2	0	2
MIMAT0017893	rno-miR-3591	Mtf2	360905	ENSRNOG00000000075	1	0	0	1	0	0	0	2	0	2
MIMAT0017893	rno-miR-3591	Phyhipl	309901	ENSRNOG00000000274	1	0	0	1	0	0	0	2	0	2
MIMAT0017893	rno-miR-3591	Strn3	114520	ENSRNOG00000060335	1	0	0	1	0	0	0	2	0	2
MIMAT0017895	rno-miR-3592	Dcx	84394	ENSRNOG00000047712	1	0	0	1	0	0	0	2	0	2
MIMAT0017895	rno-miR-3592	Gfpt2	360518	ENSRNOG00000002810	1	0	0	1	0	0	0	2	0	2
MIMAT0017895	rno-miR-3592	Pla2g4a	24653	ENSRNOG00000002657	1	0	0	1	0	0	0	2	0	2
MIMAT0017895	rno-miR-3592	Ythdf3	361920	ENSRNOG00000010084	1	0	0	1	0	0	0	2	0	2
MIMAT0017895	rno-miR-3592	Zfp687	100363361	ENSRNOG00000021026	1	0	0	1	0	0	0	2	0	2
MIMAT0017900	rno-miR-3120	Abtb2	171440	ENSRNOG00000008510	1	0	0	1	0	0	0	2	0	2
MIMAT0017900	rno-miR-3120	Amd1	81640	ENSRNOG00000000585	1	0	0	1	0	0	0	2	0	2
MIMAT0017900	rno-miR-3120	Ank3	361833	ENSRNOG00000053288	1	0	0	1	0	0	0	2	0	2
MIMAT0017900	rno-miR-3120	Atl2	298757	ENSRNOG00000006523	1	0	0	1	0	0	0	2	0	2
MIMAT0017900	rno-miR-3120	Cbl	500985	ENSRNOG00000008444	1	0	0	1	0	0	0	2	0	2
MIMAT0017900	rno-miR-3120	Cdk19	309804	ENSRNOG00000000583	1	0	0	1	0	0	0	2	0	2
MIMAT0017900	rno-miR-3120	Cnbp	64530	ENSRNOG00000010239	1	0	0	1	0	0	0	2	0	2
MIMAT0017900	rno-miR-3120	Cnih4	289324	ENSRNOG00000003717	1	0	0	1	0	0	0	2	0	2
MIMAT0017900	rno-miR-3120	Cyp26b1	312495	ENSRNOG00000015076	1	0	0	1	0	0	0	2	0	2
MIMAT0017900	rno-miR-3120	Dcun1d4	360928	ENSRNOG00000002152	2	0	0	1	0	0	0	2	0	2
MIMAT0017900	rno-miR-3120	Elfn1	288512	ENSRNOG00000022767	1	0	0	1	0	0	0	2	0	2
MIMAT0017900	rno-miR-3120	Gdap2	362004	ENSRNOG00000019754	1	0	0	1	0	0	0	2	0	2
MIMAT0017900	rno-miR-3120	Hnrnpk	117282	ENSRNOG00000019113	1	0	0	1	0	0	0	2	0	2
MIMAT0017900	rno-miR-3120	Ipo7	308939	ENSRNOG00000010427	1	0	0	1	0	0	0	2	0	2
MIMAT0017900	rno-miR-3120	Klhl13	313445	ENSRNOG00000014029	1	0	0	1	0	0	0	2	0	2
MIMAT0017900	rno-miR-3120	LOC100125364	100125364	ENSRNOG00000015597	1	0	0	1	0	0	0	2	0	2
MIMAT0017900	rno-miR-3120	Mex3c	307271	ENSRNOG00000015777	1	0	0	1	0	0	0	2	0	2
MIMAT0017900	rno-miR-3120	Naa50	288108	ENSRNOG00000039017	1	0	0	1	0	0	0	2	0	2
MIMAT0017900	rno-miR-3120	Pdgfb	24628	ENSRNOG00000017197	1	0	0	1	0	0	0	2	0	2
MIMAT0017900	rno-miR-3120	Pou4f2	171355	ENSRNOG00000012167	2	0	0	1	0	0	0	2	0	2
MIMAT0017900	rno-miR-3120	Rbl2	81758	ENSRNOG00000012153	1	0	0	1	0	0	0	2	0	2
MIMAT0017900	rno-miR-3120	Rsf1	308839	ENSRNOG00000024194	1	0	0	1	0	0	0	2	0	2
MIMAT0017900	rno-miR-3120	Scaf4	245924	ENSRNOG00000002104	1	0	0	1	0	0	0	2	0	2
MIMAT0017900	rno-miR-3120	Serpine2	29366	ENSRNOG00000015461	1	0	0	1	0	0	0	2	0	2
MIMAT0017900	rno-miR-3120	Setd5	297514	ENSRNOG00000007472	1	0	0	1	0	0	0	2	0	2
MIMAT0017900	rno-miR-3120	Smg7	360855	ENSRNOG00000027962	1	0	0	1	0	0	0	2	0	2
MIMAT0017900	rno-miR-3120	Srsf2	494445	ENSRNOG00000000248	1	0	0	1	0	0	0	2	0	2
MIMAT0017900	rno-miR-3120	Tbpl1	689030	ENSRNOG00000011114	1	0	0	1	0	0	0	2	0	2
MIMAT0017900	rno-miR-3120	Unc5c	362049	ENSRNOG00000029071	1	0	0	1	0	0	0	2	0	2
MIMAT0017900	rno-miR-3120	Usp9x	363445	ENSRNOG00000003261	1	0	0	2	0	0	0	2	0	2
MIMAT0017900	rno-miR-3120	Wee1	308937	ENSRNOG00000010017	1	0	0	1	0	0	0	2	0	2
MIMAT0017900	rno-miR-3120	Zfp608	307296	ENSRNOG00000023197	1	0	0	1	0	0	0	2	0	2
	rno-miR-155	AT1R			0	0	0	0	1	0	0	0	1	1
CUSTOM	rno-mir-155	angiotensinIItype1receptor			0	0	0	0	0	0	1	0	1	1
MIMAT0000599	rno-miR-349	A630023P12Rik			0	1	0	0	0	0	0	1	0	1
MIMAT0000599	rno-miR-349	Abcc5	116721	ENSRNOG00000029178	0	0	0	1	0	0	0	1	0	1
MIMAT0000599	rno-miR-349	Abcg3l2	360910		0	0	1	0	0	0	0	1	0	1
MIMAT0000599	rno-miR-349	Acads	64304	ENSRNOG00000001177	0	1	0	0	0	0	0	1	0	1
MIMAT0000599	rno-miR-349	Adcy9_predicted			0	1	0	0	0	0	0	1	0	1
MIMAT0000599	rno-miR-349	Adhfe1	362474	ENSRNOG00000007069	0	1	0	0	0	0	0	1	0	1
MIMAT0000599	rno-miR-349	Adsl	315150	ENSRNOG00000018655	0	1	0	0	0	0	0	1	0	1
MIMAT0000599	rno-miR-349	Akr7a2	171445	ENSRNOG00000017780	0	1	0	0	0	0	0	1	0	1
MIMAT0000599	rno-miR-349	Alox12	287454	ENSRNOG00000027037	0	1	0	0	0	0	0	1	0	1
MIMAT0000599	rno-miR-349	Anapc16	100360936	ENSRNOG00000000576	0	1	0	0	0	0	0	1	0	1
MIMAT0000599	rno-miR-349	Angptl6_predicted			0	1	0	0	0	0	0	1	0	1
MIMAT0000599	rno-miR-349	Ap4s1	366618	ENSRNOG00000005765	0	1	0	0	0	0	0	1	0	1
MIMAT0000599	rno-miR-349	Arhgap35	306400	ENSRNOG00000015852	0	1	0	0	0	0	0	1	0	1
MIMAT0000599	rno-miR-349	Art5	259167	ENSRNOG00000020242	0	1	0	0	0	0	0	1	0	1
MIMAT0000599	rno-miR-349	Atcay	362826	ENSRNOG00000020407	0	1	0	0	0	0	0	1	0	1
MIMAT0000599	rno-miR-349	B3galt5	288161	ENSRNOG00000030983	0	0	0	1	0	0	0	1	0	1
MIMAT0000599	rno-miR-349	Bcar1	25414	ENSRNOG00000019253	0	1	0	0	0	0	0	1	0	1
MIMAT0000599	rno-miR-349	BMCC1_RAT			0	1	0	0	0	0	0	1	0	1
MIMAT0000599	rno-miR-349	Bmp1	83470	ENSRNOG00000010890	0	2	0	0	0	0	0	1	0	1
MIMAT0000599	rno-miR-349	Bpi	296321	ENSRNOG00000034195	0	1	0	0	0	0	0	1	0	1
MIMAT0000599	rno-miR-349	Bsg	25246	ENSRNOG00000008414	0	1	0	0	0	0	0	1	0	1
MIMAT0000599	rno-miR-349	C8b	313421	ENSRNOG00000007639	0	2	0	0	0	0	0	1	0	1
MIMAT0000599	rno-miR-349	Cabp2	499298	ENSRNOG00000018339	0	1	0	0	0	0	0	1	0	1
MIMAT0000599	rno-miR-349	Casp8	64044	ENSRNOG00000012331	0	1	0	0	0	0	0	1	0	1
MIMAT0000599	rno-miR-349	Ccdc153	300663	ENSRNOG00000039086	0	1	0	0	0	0	0	1	0	1
MIMAT0000599	rno-miR-349	Ccdc86	293738	ENSRNOG00000020925	0	1	0	0	0	0	0	1	0	1
MIMAT0000599	rno-miR-349	Ccdc88c	362770	ENSRNOG00000004482	0	1	0	0	0	0	0	1	0	1
MIMAT0000599	rno-miR-349	Cd8b	24931	ENSRNOG00000007129	0	1	0	0	0	0	0	1	0	1
MIMAT0000599	rno-miR-349	Cebpz	362686	ENSRNOG00000005087	0	1	0	0	0	0	0	1	0	1
MIMAT0000599	rno-miR-349	Celf6	300758	ENSRNOG00000052224	0	1	0	0	0	0	0	1	0	1
MIMAT0000599	rno-miR-349	Cep85	362622	ENSRNOG00000016249	0	0	0	1	0	0	0	1	0	1
MIMAT0000599	rno-miR-349	Cip98			0	1	0	0	0	0	0	1	0	1
MIMAT0000599	rno-miR-349	Clasp2	114514	ENSRNOG00000009161	0	0	0	1	0	0	0	1	0	1
MIMAT0000599	rno-miR-349	Clic6	304081	ENSRNOG00000026870	0	1	0	0	0	0	0	1	0	1
MIMAT0000599	rno-miR-349	Clint1	360515	ENSRNOG00000005406	0	1	0	0	0	0	0	1	0	1
MIMAT0000599	rno-miR-349	Clptm1	292696	ENSRNOG00000018255	0	1	0	0	0	0	0	1	0	1
MIMAT0000599	rno-miR-349	Coil	50998	ENSRNOG00000000244	0	1	0	0	0	0	0	1	0	1
MIMAT0000599	rno-miR-349	Col9a2	362584	ENSRNOG00000011502	0	1	0	0	0	0	0	1	0	1
MIMAT0000599	rno-miR-349	Coq10a_predicted			0	1	0	0	0	0	0	1	0	1
MIMAT0000599	rno-miR-349	Crem	25620	ENSRNOG00000014900	0	1	0	0	0	0	0	1	0	1
MIMAT0000599	rno-miR-349	Crip1	691657	ENSRNOG00000027990	0	1	0	0	0	0	0	1	0	1
MIMAT0000599	rno-miR-349	Crygs	689897	ENSRNOG00000038355	0	1	0	0	0	0	0	1	0	1
MIMAT0000599	rno-miR-349	Csrp3	117505	ENSRNOG00000014327	0	1	0	0	0	0	0	1	0	1
MIMAT0000599	rno-miR-349	Ctps2	619580	ENSRNOG00000004257	0	1	0	0	0	0	0	1	0	1
MIMAT0000599	rno-miR-349	Cxcr6	100124593	ENSRNOG00000006319	0	1	0	0	0	0	0	1	0	1
MIMAT0000599	rno-miR-349	Cyp4f18	290623	ENSRNOG00000015751	0	0	1	0	0	0	0	1	0	1
MIMAT0000599	rno-miR-349	Dand5	685719	ENSRNOG00000033368	0	1	0	0	0	0	0	1	0	1
MIMAT0000599	rno-miR-349	Dapk3	64391	ENSRNOG00000020383	0	1	0	0	0	0	0	1	0	1
MIMAT0000599	rno-miR-349	Dbil5	59116	ENSRNOG00000007771	0	1	0	0	0	0	0	1	0	1
MIMAT0000599	rno-miR-349	Dcaf7	303602	ENSRNOG00000042245	0	0	0	1	0	0	0	1	0	1
MIMAT0000599	rno-miR-349	Dcp1a	361109	ENSRNOG00000016015	0	1	0	0	0	0	0	1	0	1
MIMAT0000599	rno-miR-349	Defb50	641639	ENSRNOG00000033972	0	1	0	0	0	0	0	1	0	1
MIMAT0000599	rno-miR-349	Dzip1	364475	ENSRNOG00000010311	0	1	0	0	0	0	0	1	0	1
MIMAT0000599	rno-miR-349	Eif2ak1	27137	ENSRNOG00000001050	0	1	0	0	0	0	0	1	0	1
MIMAT0000599	rno-miR-349	Elmod3	297342	ENSRNOG00000038102	0	0	0	1	0	0	0	1	0	1
MIMAT0000599	rno-miR-349	Epb4.1l3			0	1	0	0	0	0	0	1	0	1
MIMAT0000599	rno-miR-349	Epb41l3	116724	ENSRNOG00000016724	0	1	0	0	0	0	0	1	0	1
MIMAT0000599	rno-miR-349	Esyt1	29579	ENSRNOG00000060753	0	1	0	0	0	0	0	1	0	1
MIMAT0000599	rno-miR-349	F5	304929	ENSRNOG00000002815	0	1	0	0	0	0	0	1	0	1
MIMAT0000599	rno-miR-349	F830021D11Rik			0	1	0	0	0	0	0	1	0	1
MIMAT0000599	rno-miR-349	Fam174b	681398	ENSRNOG00000012369	0	1	0	0	0	0	0	1	0	1
MIMAT0000599	rno-miR-349	Fam3a	501664	ENSRNOG00000060623	0	1	0	0	0	0	0	1	0	1
MIMAT0000599	rno-miR-349	Fam53b	309060	ENSRNOG00000061348	0	0	0	1	0	0	0	1	0	1
MIMAT0000599	rno-miR-349	Fam57a	100360533	ENSRNOG00000007722	0	1	0	0	0	0	0	1	0	1
MIMAT0000599	rno-miR-349	Fam65a	291974	ENSRNOG00000017604	0	0	0	1	0	0	0	1	0	1
MIMAT0000599	rno-miR-349	Fam71b	497888	ENSRNOG00000021425	0	1	0	0	0	0	0	1	0	1
MIMAT0000599	rno-miR-349	Fau	100360647	ENSRNOG00000020982	0	1	0	0	0	0	0	1	0	1
MIMAT0000599	rno-miR-349	Fblim1	362650	ENSRNOG00000011774	0	1	0	0	0	0	0	1	0	1
MIMAT0000599	rno-miR-349	Fbxw2	311881	ENSRNOG00000018687	0	1	0	0	0	0	0	1	0	1
MIMAT0000599	rno-miR-349	Flk			0	1	0	0	0	0	0	1	0	1
MIMAT0000599	rno-miR-349	Foxp3	317382	ENSRNOG00000011702	0	0	0	1	0	0	0	1	0	1
MIMAT0000599	rno-miR-349	Galnt14	313878	ENSRNOG00000007951	0	1	0	0	0	0	0	1	0	1
MIMAT0000599	rno-miR-349	Ganab	293721	ENSRNOG00000019724	0	1	0	0	0	0	0	1	0	1
MIMAT0000599	rno-miR-349	Gart	288259	ENSRNOG00000028292	0	1	0	0	0	0	0	1	0	1
MIMAT0000599	rno-miR-349	Gfra2	25136	ENSRNOG00000014010	0	1	0	0	0	0	0	1	0	1
MIMAT0000599	rno-miR-349	Gins3	307639	ENSRNOG00000011863	0	0	0	1	0	0	0	1	0	1
MIMAT0000599	rno-miR-349	Glb1	316033	ENSRNOG00000010196	0	1	0	0	0	0	0	1	0	1
MIMAT0000599	rno-miR-349	Gmppb	363145	ENSRNOG00000037229	0	1	0	0	0	0	0	1	0	1
MIMAT0000599	rno-miR-349	Gnl3l	100034253	ENSRNOG00000002509	0	1	0	0	0	0	0	1	0	1
MIMAT0000599	rno-miR-349	Gpr179		ENSRNOG00000029245	0	1	0	0	0	0	0	1	0	1
MIMAT0000599	rno-miR-349	Gpr89_predicted			0	1	0	0	0	0	0	1	0	1
MIMAT0000599	rno-miR-349	Gpr89b	362003	ENSRNOG00000000095	0	1	0	0	0	0	0	1	0	1
MIMAT0000599	rno-miR-349	Hnf4a	25735	ENSRNOG00000008895	0	1	0	0	0	0	0	1	0	1
MIMAT0000599	rno-miR-349	Hpd	29531	ENSRNOG00000001338	0	1	0	0	0	0	0	1	0	1
MIMAT0000599	rno-miR-349	Hrct1	100359865	ENSRNOG00000039336	0	1	0	0	0	0	0	1	0	1
MIMAT0000599	rno-miR-349	Hsd17b1	25322	ENSRNOG00000019830	0	1	0	0	0	0	0	1	0	1
MIMAT0000599	rno-miR-349	Ibrdc2_predicted			0	1	0	0	0	0	0	1	0	1
MIMAT0000599	rno-miR-349	Ibsp	24477	ENSRNOG00000002158	0	0	1	0	0	0	0	1	0	1
MIMAT0000599	rno-miR-349	Ier5l	499772	ENSRNOG00000024846	0	0	1	0	0	0	0	1	0	1
MIMAT0000599	rno-miR-349	Ift81	373066	ENSRNOG00000001294	0	0	1	0	0	0	0	1	0	1
MIMAT0000599	rno-miR-349	Inca1	360555	ENSRNOG00000037418	0	1	0	0	0	0	0	1	0	1
MIMAT0000599	rno-miR-349	Ino80	296084	ENSRNOG00000014483	0	0	0	1	0	0	0	1	0	1
MIMAT0000599	rno-miR-349	Itm2b	290364	ENSRNOG00000016271	0	0	1	0	0	0	0	1	0	1
MIMAT0000599	rno-miR-349	Itsn2	313934	ENSRNOG00000046741	0	0	0	1	0	0	0	1	0	1
MIMAT0000599	rno-miR-349	Kcnc3	117101	ENSRNOG00000019959	0	1	0	0	0	0	0	1	0	1
MIMAT0000599	rno-miR-349	Kcnk10	65272	ENSRNOG00000003813	0	0	0	1	0	0	0	1	0	1
MIMAT0000599	rno-miR-349	Kcnn1	54261	ENSRNOG00000029264	0	1	0	0	0	0	0	1	0	1
MIMAT0000599	rno-miR-349	Klf15	85497	ENSRNOG00000017808	0	2	0	0	0	0	0	1	0	1
MIMAT0000599	rno-miR-349	Lasp1	29278	ENSRNOG00000004132	0	1	0	0	0	0	0	1	0	1
MIMAT0000599	rno-miR-349	Lig1	81513	ENSRNOG00000014193	0	1	0	0	0	0	0	1	0	1
MIMAT0000599	rno-miR-349	LOC100360647	100360647	ENSRNOG00000020982	0	1	0	0	0	0	0	1	0	1
MIMAT0000599	rno-miR-349	LOC100361537	100361537	ENSRNOG00000026900	0	1	0	0	0	0	0	1	0	1
MIMAT0000599	rno-miR-349	LOC100910735	100910735	ENSRNOG00000047076	0	1	0	0	0	0	0	1	0	1
MIMAT0000599	rno-miR-349	LOC100911028	100911028	ENSRNOG00000012744	0	1	0	0	0	0	0	1	0	1
MIMAT0000599	rno-miR-349	LOC102546978	360709	ENSRNOG00000001633	0	0	1	0	0	0	0	1	0	1
MIMAT0000599	rno-miR-349	LOC102553078	100360647	ENSRNOG00000020982	0	1	0	0	0	0	0	1	0	1
MIMAT0000599	rno-miR-349	LOC363267			0	2	0	0	0	0	0	1	0	1
MIMAT0000599	rno-miR-349	LOC366345			0	1	0	0	0	0	0	1	0	1
MIMAT0000599	rno-miR-349	LOC367790			0	1	0	0	0	0	0	1	0	1
MIMAT0000599	rno-miR-349	LOC498331			0	1	0	0	0	0	0	1	0	1
MIMAT0000599	rno-miR-349	LOC680678			0	1	0	0	0	0	0	1	0	1
MIMAT0000599	rno-miR-349	LOC689765			0	1	0	0	0	0	0	1	0	1
MIMAT0000599	rno-miR-349	LOC690372			0	1	0	0	0	0	0	1	0	1
MIMAT0000599	rno-miR-349	Lpin2	316737	ENSRNOG00000014876	0	0	0	1	0	0	0	1	0	1
MIMAT0000599	rno-miR-349	Lyc2	25211	ENSRNOG00000005825	0	0	1	0	0	0	0	1	0	1
MIMAT0000599	rno-miR-349	Lyk5			0	1	0	0	0	0	0	1	0	1
MIMAT0000599	rno-miR-349	Lypla2	83510	ENSRNOG00000010067	0	1	0	0	0	0	0	1	0	1
MIMAT0000599	rno-miR-349	Lyz2	25211	ENSRNOG00000005825	0	0	1	0	0	0	0	1	0	1
MIMAT0000599	rno-miR-349	Map2k5	29568	ENSRNOG00000007926	0	1	0	0	0	0	0	1	0	1
MIMAT0000599	rno-miR-349	Mapk8ip1	116457	ENSRNOG00000058478	0	1	0	0	0	0	0	1	0	1
MIMAT0000599	rno-miR-349	Mark2	60328	ENSRNOG00000021184	0	1	0	0	0	0	0	1	0	1
MIMAT0000599	rno-miR-349	Mllt1	301119	ENSRNOG00000048736	0	0	0	1	0	0	0	1	0	1
MIMAT0000599	rno-miR-349	Mtl5	309142	ENSRNOG00000014671	0	1	0	0	0	0	0	1	0	1
MIMAT0000599	rno-miR-349	Naa38	287429	ENSRNOG00000009823	0	1	0	0	0	0	0	1	0	1
MIMAT0000599	rno-miR-349	Naprt1	315085	ENSRNOG00000007939	0	1	0	0	0	0	0	1	0	1
MIMAT0000599	rno-miR-349	Nebl_predicted			0	1	0	0	0	0	0	1	0	1
MIMAT0000599	rno-miR-349	Nlgn3	171297	ENSRNOG00000003812	0	1	0	0	0	0	0	1	0	1
MIMAT0000599	rno-miR-349	Nomo1	361578	ENSRNOG00000021118	0	1	0	0	0	0	0	1	0	1
MIMAT0000599	rno-miR-349	Noxa1	311793	ENSRNOG00000009286	0	1	0	0	0	0	0	1	0	1
MIMAT0000599	rno-miR-349	NP_835194.2			0	1	0	0	0	0	0	1	0	1
MIMAT0000599	rno-miR-349	Oas1i	100910735	ENSRNOG00000047076	0	1	0	0	0	0	0	1	0	1
MIMAT0000599	rno-miR-349	Oas1k	494198	ENSRNOG00000033220	0	1	0	0	0	0	0	1	0	1
MIMAT0000599	rno-miR-349	Olr202	365337	ENSRNOG00000025819	0	1	0	0	0	0	0	1	0	1
MIMAT0000599	rno-miR-349	Opcml	116597	ENSRNOG00000023809	0	1	0	0	0	0	0	1	0	1
MIMAT0000599	rno-miR-349	Ophn1	312108	ENSRNOG00000026573	0	0	0	1	0	0	0	1	0	1
MIMAT0000599	rno-miR-349	Os-9			0	1	0	0	0	0	0	1	0	1
MIMAT0000599	rno-miR-349	Osbp2_predicted			0	1	0	0	0	0	0	1	0	1
MIMAT0000599	rno-miR-349	Osbpl6_predicted			0	1	0	0	0	0	0	1	0	1
MIMAT0000599	rno-miR-349	Pcif1	362269	ENSRNOG00000016870	0	1	0	0	0	0	0	1	0	1
MIMAT0000599	rno-miR-349	Pet112l	361974	ENSRNOG00000037655	0	1	0	0	0	0	0	1	0	1
MIMAT0000599	rno-miR-349	Pex6	100911599	ENSRNOG00000016655	0	1	0	0	0	0	0	1	0	1
MIMAT0000599	rno-miR-349	Phyhd1	296621	ENSRNOG00000016794	0	1	0	0	0	0	0	1	0	1
MIMAT0000599	rno-miR-349	Piezo2	307380	ENSRNOG00000038784	0	0	0	1	0	0	0	1	0	1
MIMAT0000599	rno-miR-349	Pigt	296360	ENSRNOG00000014690	0	1	0	0	0	0	0	1	0	1
MIMAT0000599	rno-miR-349	Pip5k1a	365865	ENSRNOG00000021068	0	1	0	0	0	0	0	1	0	1
MIMAT0000599	rno-miR-349	Plp2	302562	ENSRNOG00000039496	0	1	0	0	0	0	0	1	0	1
MIMAT0000599	rno-miR-349	Plxdc2	361282	ENSRNOG00000000142	0	1	0	0	0	0	0	1	0	1
MIMAT0000599	rno-miR-349	Pola2	85242	ENSRNOG00000020906	0	1	0	0	0	0	0	1	0	1
MIMAT0000599	rno-miR-349	Polr3gl	690254	ENSRNOG00000021209	0	1	0	0	0	0	0	1	0	1
MIMAT0000599	rno-miR-349	Ppil2	100361537	ENSRNOG00000026900	0	1	0	0	0	0	0	1	0	1
MIMAT0000599	rno-miR-349	Prss41	681033	ENSRNOG00000033690	0	1	0	0	0	0	0	1	0	1
MIMAT0000599	rno-miR-349	Q3ZAV2_RAT			0	1	0	0	0	0	0	1	0	1
MIMAT0000599	rno-miR-349	Q6I9N3_RAT			0	1	0	0	0	0	0	1	0	1
MIMAT0000599	rno-miR-349	Q7TP73_RAT			0	1	0	0	0	0	0	1	0	1
MIMAT0000599	rno-miR-349	Q8R4H5_RAT			0	1	0	0	0	0	0	1	0	1
MIMAT0000599	rno-miR-349	Rab40c	359728	ENSRNOG00000020067	0	1	0	0	0	0	0	1	0	1
MIMAT0000599	rno-miR-349	Rad23b	298012	ENSRNOG00000016137	0	0	1	0	0	0	0	1	0	1
MIMAT0000599	rno-miR-349	Rasgrp2	361714	ENSRNOG00000021098	0	1	0	0	0	0	0	1	0	1
MIMAT0000599	rno-miR-349	RGD1304579			0	1	0	0	0	0	0	1	0	1
MIMAT0000599	rno-miR-349	RGD1304587	303180	ENSRNOG00000002944	0	1	0	0	0	0	0	1	0	1
MIMAT0000599	rno-miR-349	RGD1304737_predicted			0	1	0	0	0	0	0	1	0	1
MIMAT0000599	rno-miR-349	RGD1305614_predicted			0	1	0	0	0	0	0	1	0	1
MIMAT0000599	rno-miR-349	RGD1305793			0	1	0	0	0	0	0	1	0	1
MIMAT0000599	rno-miR-349	RGD1306939			0	1	0	0	0	0	0	1	0	1
MIMAT0000599	rno-miR-349	RGD1307155	302998	ENSRNOG00000021615	0	1	0	0	0	0	0	1	0	1
MIMAT0000599	rno-miR-349	RGD1307170_predicted			0	1	0	0	0	0	0	1	0	1
MIMAT0000599	rno-miR-349	RGD1307595	295019	ENSRNOG00000011239	0	1	0	0	0	0	0	1	0	1
MIMAT0000599	rno-miR-349	RGD1307729_predicted			0	1	0	0	0	0	0	1	0	1
MIMAT0000599	rno-miR-349	RGD1309350	100911028	ENSRNOG00000012744	0	1	0	0	0	0	0	1	0	1
MIMAT0000599	rno-miR-349	RGD1310887_predicted			0	1	0	0	0	0	0	1	0	1
MIMAT0000599	rno-miR-349	RGD1311519		ENSRNOG00000011028	0	1	0	0	0	0	0	1	0	1
MIMAT0000599	rno-miR-349	RGD1560572_predicted			0	1	0	0	0	0	0	1	0	1
MIMAT0000599	rno-miR-349	RGD1562339	498107	ENSRNOG00000001767	0	0	0	1	0	0	0	1	0	1
MIMAT0000599	rno-miR-349	RGD1563359_predicted			0	1	0	0	0	0	0	1	0	1
MIMAT0000599	rno-miR-349	RGD1564638_predicted			0	1	0	0	0	0	0	1	0	1
MIMAT0000599	rno-miR-349	RGD1564862_predicted			0	1	0	0	0	0	0	1	0	1
MIMAT0000599	rno-miR-349	RGD1564865	498789	ENSRNOG00000038361	0	1	0	0	0	0	0	1	0	1
MIMAT0000599	rno-miR-349	RGD1565166	287059	ENSRNOG00000021796	0	1	0	0	0	0	0	1	0	1
MIMAT0000599	rno-miR-349	RGD1566141_predicted			0	2	0	0	0	0	0	1	0	1
MIMAT0000599	rno-miR-349	Rimbp2	266780	ENSRNOG00000022893	0	1	0	0	0	0	0	1	0	1
MIMAT0000599	rno-miR-349	Rnf24	362218	ENSRNOG00000021250	0	1	0	0	0	0	0	1	0	1
MIMAT0000599	rno-miR-349	Rpl9	100360449	ENSRNOG00000026716	0	1	0	0	0	0	0	1	0	1
MIMAT0000599	rno-miR-349	Rps15al1		ENSRNOG00000032866	0	1	0	0	0	0	0	1	0	1
MIMAT0000599	rno-miR-349	Rreb1	306873	ENSRNOG00000015701	0	0	0	1	0	0	0	1	0	1
MIMAT0000599	rno-miR-349	Rrp15	360895	ENSRNOG00000002450	0	1	0	0	0	0	0	1	0	1
MIMAT0000599	rno-miR-349	Rrp7a	362967	ENSRNOG00000022896	0	1	0	0	0	0	0	1	0	1
MIMAT0000599	rno-miR-349	Sdf2	287470	ENSRNOG00000012121	0	1	0	0	0	0	0	1	0	1
MIMAT0000599	rno-miR-349	Serhl2	500911	ENSRNOG00000022932	0	1	0	0	0	0	0	1	0	1
MIMAT0000599	rno-miR-349	Serpinb6b	364705	ENSRNOG00000016420	0	2	0	0	0	0	0	1	0	1
MIMAT0000599	rno-miR-349	Sfn	313017	ENSRNOG00000033153	0	1	0	0	0	0	0	1	0	1
MIMAT0000599	rno-miR-349	Slc15a4	246280	ENSRNOG00000000962	0	1	0	0	0	0	0	1	0	1
MIMAT0000599	rno-miR-349	Slc16a3	80878	ENSRNOG00000036677	0	1	0	0	0	0	0	1	0	1
MIMAT0000599	rno-miR-349	Slc24a2	84550	ENSRNOG00000008169	0	0	0	1	0	0	0	1	0	1
MIMAT0000599	rno-miR-349	Slc25a2	291640	ENSRNOG00000027359	0	0	0	1	0	0	0	1	0	1
MIMAT0000599	rno-miR-349	Slc34a3	246234	ENSRNOG00000010451	0	1	0	0	0	0	0	1	0	1
MIMAT0000599	rno-miR-349	Slc38a11	362141	ENSRNOG00000004966	0	1	0	0	0	0	0	1	0	1
MIMAT0000599	rno-miR-349	Slc7a10	114518	ENSRNOG00000010938	0	1	0	0	0	0	0	1	0	1
MIMAT0000599	rno-miR-349	Slco1a1	50572	ENSRNOG00000036984	0	1	0	0	0	0	0	1	0	1
MIMAT0000599	rno-miR-349	Smad2	29357	ENSRNOG00000018140	0	0	0	1	0	0	0	1	0	1
MIMAT0000599	rno-miR-349	Snrp70_predicted			0	1	0	0	0	0	0	1	0	1
MIMAT0000599	rno-miR-349	Snx6	362738	ENSRNOG00000005249	0	1	0	0	0	0	0	1	0	1
MIMAT0000599	rno-miR-349	Soga1	311578	ENSRNOG00000053240	0	0	0	1	0	0	0	1	0	1
MIMAT0000599	rno-miR-349	Sorcs2	305438	ENSRNOG00000007033	0	0	0	1	0	0	0	1	0	1
MIMAT0000599	rno-miR-349	Sp5	296510	ENSRNOG00000054086	0	1	0	0	0	0	0	1	0	1
MIMAT0000599	rno-miR-349	Spire1_predicted			0	1	0	0	0	0	0	1	0	1
MIMAT0000599	rno-miR-349	Spon1	64456	ENSRNOG00000058003	0	1	0	0	0	0	0	1	0	1
MIMAT0000599	rno-miR-349	Stk3	65189	ENSRNOG00000011278	0	0	1	0	0	0	0	1	0	1
MIMAT0000599	rno-miR-349	Stxbp2	81804	ENSRNOG00000000994	0	1	0	0	0	0	0	1	0	1
MIMAT0000599	rno-miR-349	Syt12	191595	ENSRNOG00000019306	0	0	0	1	0	0	0	1	0	1
MIMAT0000599	rno-miR-349	Tac4	282829	ENSRNOG00000004404	0	1	0	0	0	0	0	1	0	1
MIMAT0000599	rno-miR-349	Tfap4	360482	ENSRNOG00000005227	0	1	0	0	0	0	0	1	0	1
MIMAT0000599	rno-miR-349	Tfg	360709	ENSRNOG00000001633	0	0	1	0	0	0	0	1	0	1
MIMAT0000599	rno-miR-349	Thg1l	303067	ENSRNOG00000005539	0	1	0	0	0	0	0	1	0	1
MIMAT0000599	rno-miR-349	Thsd1_predicted			0	1	0	0	0	0	0	1	0	1
MIMAT0000599	rno-miR-349	Tjap1	316233	ENSRNOG00000018980	0	0	0	1	0	0	0	1	0	1
MIMAT0000599	rno-miR-349	Tm9sf4	296279	ENSRNOG00000009406	0	1	0	0	0	0	0	1	0	1
MIMAT0000599	rno-miR-349	Tmem160	292654	ENSRNOG00000015304	0	1	0	0	0	0	0	1	0	1
MIMAT0000599	rno-miR-349	Tmem255a	313453	ENSRNOG00000028085	0	1	0	0	0	0	0	1	0	1
MIMAT0000599	rno-miR-349	Tmem27	57395	ENSRNOG00000003960	0	0	1	0	0	0	0	1	0	1
MIMAT0000599	rno-miR-349	Tmem47	501569	ENSRNOG00000030418	0	0	0	1	0	0	0	1	0	1
MIMAT0000599	rno-miR-349	Tmem8c	296601	ENSRNOG00000006142	0	1	0	0	0	0	0	1	0	1
MIMAT0000599	rno-miR-349	Tnpo3	296954	ENSRNOG00000021758	0	0	0	1	0	0	0	1	0	1
MIMAT0000599	rno-miR-349	Tom1l2_predicted			0	1	0	0	0	0	0	1	0	1
MIMAT0000599	rno-miR-349	Tp53	24842	ENSRNOG00000010756	0	1	0	0	0	0	0	1	0	1
MIMAT0000599	rno-miR-349	TRAV21			0	1	0	0	0	0	0	1	0	1
MIMAT0000599	rno-miR-349	Trpm4	171143	ENSRNOG00000020714	0	1	0	0	0	0	0	1	0	1
MIMAT0000599	rno-miR-349	Trpv1	83810	ENSRNOG00000019486	0	1	0	0	0	0	0	1	0	1
MIMAT0000599	rno-miR-349	Tsga10ip	361707	ENSRNOG00000027564	0	1	0	0	0	0	0	1	0	1
MIMAT0000599	rno-miR-349	Tspear	365546	ENSRNOG00000001219	0	1	0	0	0	0	0	1	0	1
MIMAT0000599	rno-miR-349	Ttyh1_predicted			0	1	0	0	0	0	0	1	0	1
MIMAT0000599	rno-miR-349	U2af2	308335	ENSRNOG00000015914	0	1	0	0	0	0	0	1	0	1
MIMAT0000599	rno-miR-349	Ube3b	687633	ENSRNOG00000047219	0	0	0	1	0	0	0	1	0	1
MIMAT0000599	rno-miR-349	Ubxd5			0	1	0	0	0	0	0	1	0	1
MIMAT0000599	rno-miR-349	Veph1	361954	ENSRNOG00000012427	0	1	0	0	0	0	0	1	0	1
MIMAT0000599	rno-miR-349	Vsig2_predicted			0	1	0	0	0	0	0	1	0	1
MIMAT0000599	rno-miR-349	Vsig8	289236	ENSRNOG00000008668	0	1	0	0	0	0	0	1	0	1
MIMAT0000599	rno-miR-349	Wdr31	298096	ENSRNOG00000014869	0	1	0	0	0	0	0	1	0	1
MIMAT0000599	rno-miR-349	Wnt8b	293990	ENSRNOG00000013817	0	0	0	1	0	0	0	1	0	1
MIMAT0000599	rno-miR-349	Ywhab	56011	ENSRNOG00000010945	0	0	1	0	0	0	0	1	0	1
MIMAT0000599	rno-miR-349	Zc3hc1	296957	ENSRNOG00000010154	0	1	0	0	0	0	0	1	0	1
MIMAT0000599	rno-miR-349	Zfand4	286998	ENSRNOG00000011791	0	1	0	0	0	0	0	1	0	1
MIMAT0000599	rno-miR-349	Zfp187	266792	ENSRNOG00000033114	0	1	0	0	0	0	0	1	0	1
MIMAT0000599	rno-miR-349	Zgpat	296478	ENSRNOG00000014235	0	1	0	0	0	0	0	1	0	1
MIMAT0000599	rno-miR-349	Zmat2	679898	ENSRNOG00000016016	0	1	0	0	0	0	0	1	0	1
MIMAT0000861	rno-miR-184	Aars	292023	ENSRNOG00000018404	0	1	0	0	0	0	0	1	0	1
MIMAT0000861	rno-miR-184	Akap12	83425	ENSRNOG00000019549	0	0	2	0	0	0	0	1	0	1
MIMAT0000861	rno-miR-184	Bcat2	64203	ENSRNOG00000020956	0	1	0	0	0	0	0	1	0	1
MIMAT0000861	rno-miR-184	Cant1	246272	ENSRNOG00000003239	0	1	0	0	0	0	0	1	0	1
MIMAT0000861	rno-miR-184	Cdx2	66019	ENSRNOG00000032759	0	1	0	0	0	0	0	1	0	1
MIMAT0000861	rno-miR-184	Cel	24254	ENSRNOG00000010406	0	1	0	0	0	0	0	1	0	1
MIMAT0000861	rno-miR-184	Chi3l1	89824	ENSRNOG00000053272	0	1	0	0	0	0	0	1	0	1
MIMAT0000861	rno-miR-184	Chp1	64152	ENSRNOG00000004742	0	0	1	0	0	0	0	1	0	1
MIMAT0000861	rno-miR-184	Crispld2	171547	ENSRNOG00000016752	0	0	0	1	0	0	0	1	0	1
MIMAT0000861	rno-miR-184	Crmp1	25415	ENSRNOG00000004781	0	0	1	0	0	0	0	1	0	1
MIMAT0000861	rno-miR-184	Eddm3b	290032	ENSRNOG00000052100	0	1	0	0	0	0	0	1	0	1
MIMAT0000861	rno-miR-184	Ergic3	296306	ENSRNOG00000031085	0	1	0	0	0	0	0	1	0	1
MIMAT0000861	rno-miR-184	F9	24946	ENSRNOG00000003430	0	1	0	0	0	0	0	1	0	1
MIMAT0000861	rno-miR-184	Fam64a	360559	ENSRNOG00000008040	0	1	0	0	0	0	0	1	0	1
MIMAT0000861	rno-miR-184	Frag1			0	1	0	0	0	0	0	1	0	1
MIMAT0000861	rno-miR-184	Gkap1	361202	ENSRNOG00000019272	0	1	0	0	0	0	0	1	0	1
MIMAT0000861	rno-miR-184	Gngt2	690825	ENSRNOG00000006108	0	1	0	0	0	0	0	1	0	1
MIMAT0000861	rno-miR-184	Grm7	81672	ENSRNOG00000005662	0	2	0	0	0	0	0	1	0	1
MIMAT0000861	rno-miR-184	Hdac3	84578	ENSRNOG00000019618	0	1	0	0	0	0	0	1	0	1
MIMAT0000861	rno-miR-184	Hes3	64628	ENSRNOG00000010893	0	1	0	0	0	0	0	1	0	1
MIMAT0000861	rno-miR-184	Igfn1	304823	ENSRNOG00000026087	0	1	0	0	0	0	0	1	0	1
MIMAT0000861	rno-miR-184	Isg20	293052	ENSRNOG00000018151	0	1	0	0	0	0	0	1	0	1
MIMAT0000861	rno-miR-184	Kif1a	363288	ENSRNOG00000023993	0	1	0	0	0	0	0	1	0	1
MIMAT0000861	rno-miR-184	Kif1c	113886	ENSRNOG00000031364	0	1	0	0	0	0	0	1	0	1
MIMAT0000861	rno-miR-184	Lce1d		ENSRNOG00000046788	0	1	0	0	0	0	0	1	0	1
MIMAT0000861	rno-miR-184	Lime1	362289	ENSRNOG00000049336	0	1	0	0	0	0	0	1	0	1
MIMAT0000861	rno-miR-184	LOC100361144	301427	ENSRNOG00000011825	0	1	0	0	0	0	0	1	0	1
MIMAT0000861	rno-miR-184	LOC100362916		ENSRNOG00000030110	0	1	0	0	0	0	0	1	0	1
MIMAT0000861	rno-miR-184	LOC100363782	81754	ENSRNOG00000050510	0	0	1	0	0	0	0	1	0	1
MIMAT0000861	rno-miR-184	LOC100909412	259247	ENSRNOG00000033130	0	0	1	0	0	0	0	1	0	1
MIMAT0000861	rno-miR-184	LOC100910009	100909894	ENSRNOG00000031741	0	1	0	0	0	0	0	1	0	1
MIMAT0000861	rno-miR-184	LOC102555167	81754	ENSRNOG00000050510	0	0	1	0	0	0	0	1	0	1
MIMAT0000861	rno-miR-184	LOC259244	259247	ENSRNOG00000009273	0	0	1	0	0	0	0	1	0	1
MIMAT0000861	rno-miR-184	LOC497901			0	1	0	0	0	0	0	1	0	1
MIMAT0000861	rno-miR-184	LOC680812			0	1	0	0	0	0	0	1	0	1
MIMAT0000861	rno-miR-184	LOC688777			0	1	0	0	0	0	0	1	0	1
MIMAT0000861	rno-miR-184	Mag	29409	ENSRNOG00000021023	0	0	1	0	0	0	0	1	0	1
MIMAT0000861	rno-miR-184	Mif4gd	360659	ENSRNOG00000003837	0	0	1	0	0	0	0	1	0	1
MIMAT0000861	rno-miR-184	Mlh3	314320	ENSRNOG00000006699	0	1	0	0	0	0	0	1	0	1
MIMAT0000861	rno-miR-184	Mrps34	287126	ENSRNOG00000015479	0	1	0	0	0	0	0	1	0	1
MIMAT0000861	rno-miR-184	Mup4	259247	ENSRNOG00000033130	0	0	1	0	0	0	0	1	0	1
MIMAT0000861	rno-miR-184	Mxd1	362391	ENSRNOG00000017720	0	2	0	0	0	0	0	1	0	1
MIMAT0000861	rno-miR-184	Ndufb3	301427	ENSRNOG00000011825	0	1	0	0	0	0	0	1	0	1
MIMAT0000861	rno-miR-184	Nuf2	304951	ENSRNOG00000002711	0	1	0	0	0	0	0	1	0	1
MIMAT0000861	rno-miR-184	Nus1	294400	ENSRNOG00000000411	0	0	0	1	0	0	0	1	0	1
MIMAT0000861	rno-miR-184	Obp3	259247	ENSRNOG00000009273	0	0	1	0	0	0	0	1	0	1
MIMAT0000861	rno-miR-184	Olr1344	301610	ENSRNOG00000033704	0	1	0	0	0	0	0	1	0	1
MIMAT0000861	rno-miR-184	Olr16	100909894	ENSRNOG00000031741	0	1	0	0	0	0	0	1	0	1
MIMAT0000861	rno-miR-184	Olr294	100909894	ENSRNOG00000031741	0	1	0	0	0	0	0	1	0	1
MIMAT0000861	rno-miR-184	P97644_RAT			0	1	0	0	0	0	0	1	0	1
MIMAT0000861	rno-miR-184	Pds5a	305343	ENSRNOG00000002541	0	1	0	0	0	0	0	1	0	1
MIMAT0000861	rno-miR-184	Pgap2	116675	ENSRNOG00000020371	0	1	0	0	0	0	0	1	0	1
MIMAT0000861	rno-miR-184	Pikfyve	316457	ENSRNOG00000015158	0	1	0	0	0	0	0	1	0	1
MIMAT0000861	rno-miR-184	Pkd1	24650	ENSRNOG00000010771	0	1	0	0	0	0	0	1	0	1
MIMAT0000861	rno-miR-184	Pla2g5	29354	ENSRNOG00000016838	0	0	1	0	0	0	0	1	0	1
MIMAT0000861	rno-miR-184	Plcd4	140693	ENSRNOG00000016361	0	1	0	0	0	0	0	1	0	1
MIMAT0000861	rno-miR-184	Pld4	362792	ENSRNOG00000028566	0	1	0	0	0	0	0	1	0	1
MIMAT0000861	rno-miR-184	Ppp1r21	362697	ENSRNOG00000016528	0	2	0	0	0	0	0	1	0	1
MIMAT0000861	rno-miR-184	Prss37	362346	ENSRNOG00000012201	0	1	0	0	0	0	0	1	0	1
MIMAT0000861	rno-miR-184	Ptar1	286972	ENSRNOG00000014891	0	1	0	0	0	0	0	1	0	1
MIMAT0000861	rno-miR-184	Rab1b	81754	ENSRNOG00000050510	0	0	1	0	0	0	0	1	0	1
MIMAT0000861	rno-miR-184	Ret	24716	ENSRNOG00000014751	0	0	1	0	0	0	0	1	0	1
MIMAT0000861	rno-miR-184	RGD1307752	296315	ENSRNOG00000020317	0	1	0	0	0	0	0	1	0	1
MIMAT0000861	rno-miR-184	RGD1311873			0	1	0	0	0	0	0	1	0	1
MIMAT0000861	rno-miR-184	RGD1562359_predicted			0	1	0	0	0	0	0	1	0	1
MIMAT0000861	rno-miR-184	RGD1566134	259247	ENSRNOG00000009273	0	0	1	0	0	0	0	1	0	1
MIMAT0000861	rno-miR-184	Riok1	291061	ENSRNOG00000014049	0	1	0	0	0	0	0	1	0	1
MIMAT0000861	rno-miR-184	Rnf103	84508	ENSRNOG00000007272	0	1	0	0	0	0	0	1	0	1
MIMAT0000861	rno-miR-184	Scrg1	64458	ENSRNOG00000013228	0	1	0	0	0	0	0	1	0	1
MIMAT0000861	rno-miR-184	Sdhc	289217	ENSRNOG00000003163	0	0	1	0	0	0	0	1	0	1
MIMAT0000861	rno-miR-184	Sema5a	310207	ENSRNOG00000011977	0	1	0	0	0	0	0	1	0	1
MIMAT0000861	rno-miR-184	Sf1	117855	ENSRNOG00000021085	0	2	0	0	0	0	0	1	0	1
MIMAT0000861	rno-miR-184	Sf3b4	295270	ENSRNOG00000021181	0	1	0	0	0	0	0	1	0	1
MIMAT0000861	rno-miR-184	Smarca2	361745	ENSRNOG00000011931	0	1	0	0	0	0	0	1	0	1
MIMAT0000861	rno-miR-184	Spag8	362508	ENSRNOG00000032539	0	2	0	0	0	0	0	1	0	1
MIMAT0000861	rno-miR-184	ST7	296911	ENSRNOG00000056243	0	2	0	0	0	0	0	1	0	1
MIMAT0000861	rno-miR-184	Sult5a1	292077	ENSRNOG00000015695	0	1	0	0	0	0	0	1	0	1
MIMAT0000861	rno-miR-184	Timmdc1	303922	ENSRNOG00000002999	0	1	0	0	0	0	0	1	0	1
MIMAT0000861	rno-miR-184	Tpm1	117557	ENSRNOG00000018184	0	0	1	0	0	0	0	1	0	1
MIMAT0000861	rno-miR-184	Tpm3	117557	ENSRNOG00000017441	0	0	1	0	0	0	0	1	0	1
MIMAT0000861	rno-miR-184	Wfdc6a	685153	ENSRNOG00000042526	0	1	0	0	0	0	0	1	0	1
MIMAT0000861	rno-miR-184	Zbtb7a	117107	ENSRNOG00000020161	0	1	0	0	0	0	0	1	0	1
MIMAT0000899	rno-miR-297	2310001H12Rik			0	1	0	0	0	0	0	1	0	1
MIMAT0000899	rno-miR-297	4732418C07Rik			0	1	0	0	0	0	0	1	0	1
MIMAT0000899	rno-miR-297	Aars2	301254	ENSRNOG00000025808	0	2	0	0	0	0	0	1	0	1
MIMAT0000899	rno-miR-297	Abca5	286970	ENSRNOG00000004378	0	0	1	0	0	0	0	1	0	1
MIMAT0000899	rno-miR-297	Abca9_predicted			0	1	0	0	0	0	0	1	0	1
MIMAT0000899	rno-miR-297	Abcb1b	24646	ENSRNOG00000008012	0	1	0	0	0	0	0	1	0	1
MIMAT0000899	rno-miR-297	Abcb8	362302	ENSRNOG00000008557	0	2	0	0	0	0	0	1	0	1
MIMAT0000899	rno-miR-297	Abcd2	84356	ENSRNOG00000015538	0	0	0	1	0	0	0	1	0	1
MIMAT0000899	rno-miR-297	Abhd3	291793	ENSRNOG00000029370	0	1	0	0	0	0	0	1	0	1
MIMAT0000899	rno-miR-297	Ablim2	360958	ENSRNOG00000007882	0	1	0	0	0	0	0	1	0	1
MIMAT0000899	rno-miR-297	Acly	24159	ENSRNOG00000016924	0	0	2	0	0	0	0	1	0	1
MIMAT0000899	rno-miR-297	Adad1	294979	ENSRNOG00000017246	0	1	0	0	0	0	0	1	0	1
MIMAT0000899	rno-miR-297	Adam2	56806	ENSRNOG00000017027	0	1	0	0	0	0	0	1	0	1
MIMAT0000899	rno-miR-297	Adh4	29646	ENSRNOG00000046357	0	1	0	0	0	0	0	1	0	1
MIMAT0000899	rno-miR-297	Adi1	298934	ENSRNOG00000008950	0	1	0	0	0	0	0	1	0	1
MIMAT0000899	rno-miR-297	Agbl2	366124	ENSRNOG00000008467	0	1	0	0	0	0	0	1	0	1
MIMAT0000899	rno-miR-297	Aifm1	83533	ENSRNOG00000006067	0	0	2	0	0	0	0	1	0	1
MIMAT0000899	rno-miR-297	Ammecr1	501539	ENSRNOG00000022166	0	1	0	0	0	0	0	1	0	1
MIMAT0000899	rno-miR-297	Amph	100909679	ENSRNOG00000012490	0	1	0	0	0	0	0	1	0	1
MIMAT0000899	rno-miR-297	Angptl7	102552055	ENSRNOG00000009589	0	1	0	0	0	0	0	1	0	1
MIMAT0000899	rno-miR-297	Ankrd34a	295283	ENSRNOG00000033741	0	0	1	0	0	0	0	1	0	1
MIMAT0000899	rno-miR-297	Ankrd50_predicted			0	1	0	0	0	0	0	1	0	1
MIMAT0000899	rno-miR-297	Apbb1ip	307171	ENSRNOG00000017803	0	1	0	0	0	0	0	1	0	1
MIMAT0000899	rno-miR-297	App	54226	ENSRNOG00000006997	0	1	0	0	0	0	0	1	0	1
MIMAT0000899	rno-miR-297	Arntl	29657	ENSRNOG00000014448	0	0	1	0	0	0	0	1	0	1
MIMAT0000899	rno-miR-297	Art2b	293152	ENSRNOG00000019687	0	0	1	0	0	0	0	1	0	1
MIMAT0000899	rno-miR-297	Ascl3	246301	ENSRNOG00000013702	0	1	0	0	0	0	0	1	0	1
MIMAT0000899	rno-miR-297	Aspm_predicted			0	1	0	0	0	0	0	1	0	1
MIMAT0000899	rno-miR-297	Atf1	315305	ENSRNOG00000061088	0	1	0	0	0	0	0	1	0	1
MIMAT0000899	rno-miR-297	Atg5		ENSRNOG00000000322	0	1	0	0	0	0	0	1	0	1
MIMAT0000899	rno-miR-297	Atp2c1	170699	ENSRNOG00000013305	0	1	0	0	0	0	0	1	0	1
MIMAT0000899	rno-miR-297	Atp5c1	116550	ENSRNOG00000019223	0	1	0	0	0	0	0	1	0	1
MIMAT0000899	rno-miR-297	Atp5j	94271	ENSRNOG00000001551	0	0	1	0	0	0	0	1	0	1
MIMAT0000899	rno-miR-297	Aurkb	114592	ENSRNOG00000005659	0	1	0	0	0	0	0	1	0	1
MIMAT0000899	rno-miR-297	B3galnt1	310508	ENSRNOG00000012019	0	1	0	0	0	0	0	1	0	1
MIMAT0000899	rno-miR-297	Bag5	366734	ENSRNOG00000011527	0	1	0	0	0	0	0	1	0	1
MIMAT0000899	rno-miR-297	Baz2b_predicted			0	1	0	0	0	0	0	1	0	1
MIMAT0000899	rno-miR-297	Bcar3_predicted			0	1	0	0	0	0	0	1	0	1
MIMAT0000899	rno-miR-297	Bfsp1	25394	ENSRNOG00000005707	0	1	0	0	0	0	0	1	0	1
MIMAT0000899	rno-miR-297	Brwd3_predicted			0	1	0	0	0	0	0	1	0	1
MIMAT0000899	rno-miR-297	Btg4	315650	ENSRNOG00000011277	0	1	0	0	0	0	0	1	0	1
MIMAT0000899	rno-miR-297	C1qtnf2	497886	ENSRNOG00000003870	0	1	0	0	0	0	0	1	0	1
MIMAT0000899	rno-miR-297	C3orf6h			0	1	0	0	0	0	0	1	0	1
MIMAT0000899	rno-miR-297	Cacna1g	29717	ENSRNOG00000060528	0	1	0	0	0	0	0	1	0	1
MIMAT0000899	rno-miR-297	Camta1	362665	ENSRNOG00000018602	0	0	0	1	0	0	0	1	0	1
MIMAT0000899	rno-miR-297	Caps2_predicted			0	1	0	0	0	0	0	1	0	1
MIMAT0000899	rno-miR-297	Car8	297814	ENSRNOG00000005669	0	1	0	0	0	0	0	1	0	1
MIMAT0000899	rno-miR-297	Card9	64171	ENSRNOG00000051470	0	1	0	0	0	0	0	1	0	1
MIMAT0000899	rno-miR-297	Ccdc15	367056	ENSRNOG00000032180	0	1	0	0	0	0	0	1	0	1
MIMAT0000899	rno-miR-297	Ccdc39_predicted			0	1	0	0	0	0	0	1	0	1
MIMAT0000899	rno-miR-297	Ccdc51	316008	ENSRNOG00000020688	0	1	0	0	0	0	0	1	0	1
MIMAT0000899	rno-miR-297	Ccnt2	304758	ENSRNOG00000017113	0	0	0	1	0	0	0	1	0	1
MIMAT0000899	rno-miR-297	Cd59	25407	ENSRNOG00000042821	0	0	0	1	0	0	0	1	0	1
MIMAT0000899	rno-miR-297	Cdc14b	361195	ENSRNOG00000018999	0	1	0	0	0	0	0	1	0	1
MIMAT0000899	rno-miR-297	Cdc42bpa	114116	ENSRNOG00000002841	0	0	1	0	0	0	0	1	0	1
MIMAT0000899	rno-miR-297	Cdx4	302400	ENSRNOG00000002974	0	1	0	0	0	0	0	1	0	1
MIMAT0000899	rno-miR-297	Cenph	681185	ENSRNOG00000018615	0	1	0	0	0	0	0	1	0	1
MIMAT0000899	rno-miR-297	Cenpk	294712	ENSRNOG00000039740	0	1	0	0	0	0	0	1	0	1
MIMAT0000899	rno-miR-297	Cenpn	361416	ENSRNOG00000011296	0	1	0	0	0	0	0	1	0	1
MIMAT0000899	rno-miR-297	Cep83	100363642	ENSRNOG00000007859	0	1	0	0	0	0	0	1	0	1
MIMAT0000899	rno-miR-297	Chek2	114212	ENSRNOG00000037509	0	1	0	0	0	0	0	1	0	1
MIMAT0000899	rno-miR-297	Cinp	299334	ENSRNOG00000008035	0	1	0	0	0	0	0	1	0	1
MIMAT0000899	rno-miR-297	Clec2g	362447	ENSRNOG00000026511	0	1	0	0	0	0	0	1	0	1
MIMAT0000899	rno-miR-297	Cln6	315746	ENSRNOG00000007164	0	1	0	0	0	0	0	1	0	1
MIMAT0000899	rno-miR-297	Clpx	300786	ENSRNOG00000030225	0	0	1	0	0	0	0	1	0	1
MIMAT0000899	rno-miR-297	Colec12	361289	ENSRNOG00000016366	0	0	1	0	0	0	0	1	0	1
MIMAT0000899	rno-miR-297	Copg2	301742	ENSRNOG00000011014	0	1	0	0	0	0	0	1	0	1
MIMAT0000899	rno-miR-297	Cox6b1	688869	ENSRNOG00000024309	0	1	0	0	0	0	0	1	0	1
MIMAT0000899	rno-miR-297	Cracr2a	500324	ENSRNOG00000025874	0	1	0	0	0	0	0	1	0	1
MIMAT0000899	rno-miR-297	Crcp	114205	ENSRNOG00000000901	0	1	0	0	0	0	0	1	0	1
MIMAT0000899	rno-miR-297	Creb3l1	362165	ENSRNOG00000005413	0	0	1	0	0	0	0	1	0	1
MIMAT0000899	rno-miR-297	Crls1	366196	ENSRNOG00000021273	0	0	1	0	0	0	0	1	0	1
MIMAT0000899	rno-miR-297	Csmd2	313040	ENSRNOG00000007057	0	1	0	0	0	0	0	1	0	1
MIMAT0000899	rno-miR-297	Ctbs	81652	ENSRNOG00000015573	0	1	0	0	0	0	0	1	0	1
MIMAT0000899	rno-miR-297	Ctnnd2		ENSRNOG00000046408	0	1	0	0	0	0	0	1	0	1
MIMAT0000899	rno-miR-297	Cttnbp2	282587	ENSRNOG00000061845	0	1	0	0	0	0	0	1	0	1
MIMAT0000899	rno-miR-297	Cwc25	360613	ENSRNOG00000004091	0	1	0	0	0	0	0	1	0	1
MIMAT0000899	rno-miR-297	Cwh43	305307	ENSRNOG00000002174	0	1	0	0	0	0	0	1	0	1
MIMAT0000899	rno-miR-297	Dab1	266729	ENSRNOG00000007410	0	1	0	0	0	0	0	1	0	1
MIMAT0000899	rno-miR-297	Dclre1b	310745	ENSRNOG00000019367	0	1	0	0	0	0	0	1	0	1
MIMAT0000899	rno-miR-297	Dcn	29139	ENSRNOG00000004554	0	1	0	0	0	0	0	1	0	1
MIMAT0000899	rno-miR-297	Dennd4a		ENSRNOG00000011739	0	1	0	0	0	0	0	1	0	1
MIMAT0000899	rno-miR-297	Dlg3	58948	ENSRNOG00000002767	0	0	1	0	0	0	0	1	0	1
MIMAT0000899	rno-miR-297	Dnajc2	116456	ENSRNOG00000012392	0	0	1	0	0	0	0	1	0	1
MIMAT0000899	rno-miR-297	Dopey1	315864	ENSRNOG00000022847	0	1	0	0	0	0	0	1	0	1
MIMAT0000899	rno-miR-297	Dsc2	291760	ENSRNOG00000039969	0	1	0	0	0	0	0	1	0	1
MIMAT0000899	rno-miR-297	Dscaml1	315615	ENSRNOG00000016502	0	1	0	0	0	0	0	1	0	1
MIMAT0000899	rno-miR-297	Dusp16	297682	ENSRNOG00000006628	0	1	0	0	0	0	0	1	0	1
MIMAT0000899	rno-miR-297	Dusp7	300980	ENSRNOG00000010789	0	0	0	1	0	0	0	1	0	1
MIMAT0000899	rno-miR-297	Ears2		ENSRNOG00000025353	0	1	0	0	0	0	0	1	0	1
MIMAT0000899	rno-miR-297	Ecel1	60417	ENSRNOG00000019447	0	0	0	1	0	0	0	1	0	1
MIMAT0000899	rno-miR-297	Ecm1	116662	ENSRNOG00000021166	0	1	0	0	0	0	0	1	0	1
MIMAT0000899	rno-miR-297	Eif3e	100365062	ENSRNOG00000027690	0	1	0	0	0	0	0	1	0	1
MIMAT0000899	rno-miR-297	Eif4e2	363275	ENSRNOG00000019634	0	1	0	0	0	0	0	1	0	1
MIMAT0000899	rno-miR-297	Eltd1	64124	ENSRNOG00000033940	0	1	0	0	0	0	0	1	0	1
MIMAT0000899	rno-miR-297	Emc2	362905	ENSRNOG00000005123	0	1	0	0	0	0	0	1	0	1
MIMAT0000899	rno-miR-297	Emd	25437	ENSRNOG00000058882	0	1	0	0	0	0	0	1	0	1
MIMAT0000899	rno-miR-297	Enpp5	316249	ENSRNOG00000010232	0	2	0	0	0	0	0	1	0	1
MIMAT0000899	rno-miR-297	ENSMUSG00000055704			0	1	0	0	0	0	0	1	0	1
MIMAT0000899	rno-miR-297	Epha1	312279	ENSRNOG00000017525	0	1	0	0	0	0	0	1	0	1
MIMAT0000899	rno-miR-297	Epha6		ENSRNOG00000029184	0	1	0	0	0	0	0	1	0	1
MIMAT0000899	rno-miR-297	Epha8	60589	ENSRNOG00000013036	0	1	0	0	0	0	0	1	0	1
MIMAT0000899	rno-miR-297	Ergic2	297728	ENSRNOG00000001852	0	0	1	0	0	0	0	1	0	1
MIMAT0000899	rno-miR-297	Esco1	100910680	ENSRNOG00000014031	0	1	0	0	0	0	0	1	0	1
MIMAT0000899	rno-miR-297	Extl3	102549615	ENSRNOG00000013581	0	1	0	0	0	0	0	1	0	1
MIMAT0000899	rno-miR-297	Fam110b	500400	ENSRNOG00000009114	0	1	0	0	0	0	0	1	0	1
MIMAT0000899	rno-miR-297	Fam83a	500873	ENSRNOG00000006251	0	1	0	0	0	0	0	1	0	1
MIMAT0000899	rno-miR-297	Fbln1	315191	ENSRNOG00000014137	0	1	0	0	0	0	0	1	0	1
MIMAT0000899	rno-miR-297	Fbxo10	362511	ENSRNOG00000012634	0	1	0	0	0	0	0	1	0	1
MIMAT0000899	rno-miR-297	Fbxo43	315034	ENSRNOG00000010459	0	1	0	0	0	0	0	1	0	1
MIMAT0000899	rno-miR-297	Fbxw17	361219	ENSRNOG00000030027	0	1	0	0	0	0	0	1	0	1
MIMAT0000899	rno-miR-297	Fermt2	289992	ENSRNOG00000009102	0	0	1	0	0	0	0	1	0	1
MIMAT0000899	rno-miR-297	Fezf1	500048	ENSRNOG00000007608	0	1	0	0	0	0	0	1	0	1
MIMAT0000899	rno-miR-297	Fgd2_predicted			0	1	0	0	0	0	0	1	0	1
MIMAT0000899	rno-miR-297	Fgd2	309653	ENSRNOG00000000528	0	1	0	0	0	0	0	1	0	1
MIMAT0000899	rno-miR-297	Fgf23	170583	ENSRNOG00000019855	0	1	0	0	0	0	0	1	0	1
MIMAT0000899	rno-miR-297	Fgfbp1	64535	ENSRNOG00000003095	0	1	0	0	0	0	0	1	0	1
MIMAT0000899	rno-miR-297	Fhad1	500577	ENSRNOG00000028064	0	1	0	0	0	0	0	1	0	1
MIMAT0000899	rno-miR-297	Fhod1	291964	ENSRNOG00000054625	0	1	0	0	0	0	0	1	0	1
MIMAT0000899	rno-miR-297	Fkbp4	260321	ENSRNOG00000006444	0	1	0	0	0	0	0	1	0	1
MIMAT0000899	rno-miR-297	Fmc1	500087	ENSRNOG00000005618	0	1	0	0	0	0	0	1	0	1
MIMAT0000899	rno-miR-297	Foxr2	302583	ENSRNOG00000030619	0	1	0	0	0	0	0	1	0	1
MIMAT0000899	rno-miR-297	Gabrb2	25451	ENSRNOG00000003680	0	1	0	0	0	0	0	1	0	1
MIMAT0000899	rno-miR-297	Gbe1	288333	ENSRNOG00000051232	0	1	0	0	0	0	0	1	0	1
MIMAT0000899	rno-miR-297	Gcnt1	64043	ENSRNOG00000050534	0	1	0	0	0	0	0	1	0	1
MIMAT0000899	rno-miR-297	Ghr	25235	ENSRNOG00000015654	0	1	0	0	0	0	0	1	0	1
MIMAT0000899	rno-miR-297	Gimap9	493865	ENSRNOG00000024569	0	1	0	0	0	0	0	1	0	1
MIMAT0000899	rno-miR-297	Gin1	316687	ENSRNOG00000011962	0	1	0	0	0	0	0	1	0	1
MIMAT0000899	rno-miR-297	Ginm1	361448	ENSRNOG00000015239	0	1	0	0	0	0	0	1	0	1
MIMAT0000899	rno-miR-297	Gip	25040	ENSRNOG00000006306	0	1	0	0	0	0	0	1	0	1
MIMAT0000899	rno-miR-297	Gk	79223	ENSRNOG00000034116	0	0	1	0	0	0	0	1	0	1
MIMAT0000899	rno-miR-297	Glb1l	301525	ENSRNOG00000019243	0	1	0	0	0	0	0	1	0	1
MIMAT0000899	rno-miR-297	Glis1	298732	ENSRNOG00000000138	0	1	0	0	0	0	0	1	0	1
MIMAT0000899	rno-miR-297	Gpd1l	363159	ENSRNOG00000026455	0	1	0	0	0	0	0	1	0	1
MIMAT0000899	rno-miR-297	Gpr110	301266	ENSRNOG00000025654	0	1	0	0	0	0	0	1	0	1
MIMAT0000899	rno-miR-297	Gtf2f2	81674	ENSRNOG00000029316	0	1	0	0	0	0	0	1	0	1
MIMAT0000899	rno-miR-297	Gtf2h2_predicted			0	1	0	0	0	0	0	1	0	1
MIMAT0000899	rno-miR-297	Gucy2c	25711	ENSRNOG00000009031	0	1	0	0	0	0	0	1	0	1
MIMAT0000899	rno-miR-297	Gyltl1b	311202	ENSRNOG00000006353	0	2	0	0	0	0	0	1	0	1
MIMAT0000899	rno-miR-297	H1fx	500252	ENSRNOG00000027722	0	1	0	0	0	0	0	1	0	1
MIMAT0000899	rno-miR-297	Has2	25694	ENSRNOG00000004854	0	0	0	1	0	0	0	1	0	1
MIMAT0000899	rno-miR-297	Hdhd1	291585	ENSRNOG00000025422	0	1	0	0	0	0	0	1	0	1
MIMAT0000899	rno-miR-297	Herc4	309758	ENSRNOG00000061040	0	0	1	0	0	0	0	1	0	1
MIMAT0000899	rno-miR-297	Hist1h2ai_predicted			0	1	0	0	0	0	0	1	0	1
MIMAT0000899	rno-miR-297	Hnrnph1	140931	ENSRNOG00000003399	0	0	2	0	0	0	0	1	0	1
MIMAT0000899	rno-miR-297	Hnrph1			0	1	0	0	0	0	0	1	0	1
MIMAT0000899	rno-miR-297	Hoxd10	303991	ENSRNOG00000001581	0	1	0	0	0	0	0	1	0	1
MIMAT0000899	rno-miR-297	Hrasls5	293711	ENSRNOG00000023528	0	1	0	0	0	0	0	1	0	1
MIMAT0000899	rno-miR-297	Hsfy2	316409	ENSRNOG00000038569	0	1	0	0	0	0	0	1	0	1
MIMAT0000899	rno-miR-297	Igf2r	25151	ENSRNOG00000014997	0	1	0	0	0	0	0	1	0	1
MIMAT0000899	rno-miR-297	Igtp	102555634	ENSRNOG00000027008	0	1	0	0	0	0	0	1	0	1
MIMAT0000899	rno-miR-297	Il15ra	690369	ENSRNOG00000018706	0	1	0	0	0	0	0	1	0	1
MIMAT0000899	rno-miR-297	Itch	311567	ENSRNOG00000018099	0	1	0	0	0	0	0	1	0	1
MIMAT0000899	rno-miR-297	Itgb1bp1	298914	ENSRNOG00000059402	0	0	0	1	0	0	0	1	0	1
MIMAT0000899	rno-miR-297	Itgb1bp2	317258	ENSRNOG00000003596	0	1	0	0	0	0	0	1	0	1
MIMAT0000899	rno-miR-297	Izumo3	100362588	ENSRNOG00000022488	0	1	0	0	0	0	0	1	0	1
MIMAT0000899	rno-miR-297	Kalrn	84009	ENSRNOG00000001706	0	1	0	0	0	0	0	1	0	1
MIMAT0000899	rno-miR-297	Kansl1l	367289	ENSRNOG00000028149	0	1	0	0	0	0	0	1	0	1
MIMAT0000899	rno-miR-297	Kat6a	306571	ENSRNOG00000025174	0	1	0	0	0	0	0	1	0	1
MIMAT0000899	rno-miR-297	Kcnmb3	310303	ENSRNOG00000027836	0	1	0	0	0	0	0	1	0	1
MIMAT0000899	rno-miR-297	Kcnv1	60326	ENSRNOG00000004117	0	1	0	0	0	0	0	1	0	1
MIMAT0000899	rno-miR-297	Kdf1	100911383	ENSRNOG00000007572	0	1	0	0	0	0	0	1	0	1
MIMAT0000899	rno-miR-297	Kiss1	289023	ENSRNOG00000047481	0	1	0	0	0	0	0	1	0	1
MIMAT0000899	rno-miR-297	Klrb1a	100190921	ENSRNOG00000049224	0	1	0	0	0	0	0	1	0	1
MIMAT0000899	rno-miR-297	Klrc1	29683	ENSRNOG00000055196	0	1	0	0	0	0	0	1	0	1
MIMAT0000899	rno-miR-297	Klrc3	29683	ENSRNOG00000009477	0	1	0	0	0	0	0	1	0	1
MIMAT0000899	rno-miR-297	Kptn	308107	ENSRNOG00000001493	0	1	0	0	0	0	0	1	0	1
MIMAT0000899	rno-miR-297	Krt7	300242	ENSRNOG00000008057	0	1	0	0	0	0	0	1	0	1
MIMAT0000899	rno-miR-297	Lamc3	102554659	ENSRNOG00000009769	0	1	0	0	0	0	0	1	0	1
MIMAT0000899	rno-miR-297	Lcn10	29552	ENSRNOG00000028074	0	1	0	0	0	0	0	1	0	1
MIMAT0000899	rno-miR-297	Lcn5	29552	ENSRNOG00000028074	0	1	0	0	0	0	0	1	0	1
MIMAT0000899	rno-miR-297	LOC100359550	100359550	ENSRNOG00000037978	0	1	0	0	0	0	0	1	0	1
MIMAT0000899	rno-miR-297	LOC100360604	79449	ENSRNOG00000029410	0	1	0	0	0	0	0	1	0	1
MIMAT0000899	rno-miR-297	LOC100360638	499110	ENSRNOG00000018936	0	1	0	0	0	0	0	1	0	1
MIMAT0000899	rno-miR-297	LOC100361103	79449	ENSRNOG00000029410	0	1	0	0	0	0	0	1	0	1
MIMAT0000899	rno-miR-297	LOC100361642	100361642	ENSRNOG00000029978	0	1	0	0	0	0	0	1	0	1
MIMAT0000899	rno-miR-297	LOC100361811	79449	ENSRNOG00000029410	0	1	0	0	0	0	0	1	0	1
MIMAT0000899	rno-miR-297	LOC100362709		ENSRNOG00000022340	0	1	0	0	0	0	0	1	0	1
MIMAT0000899	rno-miR-297	LOC100363509		ENSRNOG00000006924	0	1	0	0	0	0	0	1	0	1
MIMAT0000899	rno-miR-297	LOC100363943		ENSRNOG00000033056	0	1	0	0	0	0	0	1	0	1
MIMAT0000899	rno-miR-297	LOC100364500	100364500	ENSRNOG00000048951	0	1	0	0	0	0	0	1	0	1
MIMAT0000899	rno-miR-297	LOC100365902	29554	ENSRNOG00000025383	0	0	1	0	0	0	0	1	0	1
MIMAT0000899	rno-miR-297	LOC100909453	100909453	ENSRNOG00000048482	0	1	0	0	0	0	0	1	0	1
MIMAT0000899	rno-miR-297	LOC100909679	100909679	ENSRNOG00000012490	0	1	0	0	0	0	0	1	0	1
MIMAT0000899	rno-miR-297	LOC100909878	100361715	ENSRNOG00000047766	0	1	0	0	0	0	0	1	0	1
MIMAT0000899	rno-miR-297	LOC100910288	170946	ENSRNOG00000050065	0	1	0	0	0	0	0	1	0	1
MIMAT0000899	rno-miR-297	LOC100910625	102551504	ENSRNOG00000050887	0	1	0	0	0	0	0	1	0	1
MIMAT0000899	rno-miR-297	LOC100910792	100909679	ENSRNOG00000012490	0	1	0	0	0	0	0	1	0	1
MIMAT0000899	rno-miR-297	LOC100910893	100910893	ENSRNOG00000047515	0	1	0	0	0	0	0	1	0	1
MIMAT0000899	rno-miR-297	LOC100911104	100911104	ENSRNOG00000023397	0	1	0	0	0	0	0	1	0	1
MIMAT0000899	rno-miR-297	LOC100911318	100911318	ENSRNOG00000030722	0	1	0	0	0	0	0	1	0	1
MIMAT0000899	rno-miR-297	LOC100911380	100911380	ENSRNOG00000046501	0	1	0	0	0	0	0	1	0	1
MIMAT0000899	rno-miR-297	LOC100911383	100911383	ENSRNOG00000007572	0	1	0	0	0	0	0	1	0	1
MIMAT0000899	rno-miR-297	LOC100911646	364137	ENSRNOG00000046442	0	0	1	0	0	0	0	1	0	1
MIMAT0000899	rno-miR-297	LOC100911971	100911971	ENSRNOG00000026175	0	1	0	0	0	0	0	1	0	1
MIMAT0000899	rno-miR-297	LOC102549291	102549291	ENSRNOG00000050230	0	1	0	0	0	0	0	1	0	1
MIMAT0000899	rno-miR-297	LOC102551340		ENSRNOG00000047145	0	0	0	1	0	0	0	1	0	1
MIMAT0000899	rno-miR-297	LOC102552732	100911104	ENSRNOG00000023397	0	1	0	0	0	0	0	1	0	1
MIMAT0000899	rno-miR-297	LOC102552895	102552895	ENSRNOG00000046561	0	2	0	0	0	0	0	1	0	1
MIMAT0000899	rno-miR-297	LOC102555578	102549291	ENSRNOG00000050230	0	1	0	0	0	0	0	1	0	1
MIMAT0000899	rno-miR-297	LOC102557117	102557117	ENSRNOG00000047922	0	2	0	0	0	0	0	1	0	1
MIMAT0000899	rno-miR-297	LOC292017			0	1	0	0	0	0	0	1	0	1
MIMAT0000899	rno-miR-297	LOC300173			0	1	0	0	0	0	0	1	0	1
MIMAT0000899	rno-miR-297	LOC300191			0	1	0	0	0	0	0	1	0	1
MIMAT0000899	rno-miR-297	LOC308240			0	2	0	0	0	0	0	1	0	1
MIMAT0000899	rno-miR-297	LOC317456	317456	ENSRNOG00000003883	0	1	0	0	0	0	0	1	0	1
MIMAT0000899	rno-miR-297	LOC362863	362863	ENSRNOG00000026807	0	1	0	0	0	0	0	1	0	1
MIMAT0000899	rno-miR-297	LOC365238	365238	ENSRNOG00000015168	0	1	0	0	0	0	0	1	0	1
MIMAT0000899	rno-miR-297	LOC365502			0	1	0	0	0	0	0	1	0	1
MIMAT0000899	rno-miR-297	LOC494224	494224	ENSRNOG00000030258	0	1	0	0	0	0	0	1	0	1
MIMAT0000899	rno-miR-297	LOC498152	498152	ENSRNOG00000030354	0	1	0	0	0	0	0	1	0	1
MIMAT0000899	rno-miR-297	LOC498231	498231	ENSRNOG00000029418	0	1	0	0	0	0	0	1	0	1
MIMAT0000899	rno-miR-297	LOC498308	498308	ENSRNOG00000032812	0	1	0	0	0	0	0	1	0	1
MIMAT0000899	rno-miR-297	LOC500598			0	1	0	0	0	0	0	1	0	1
MIMAT0000899	rno-miR-297	LOC500845		ENSRNOG00000029354	0	1	0	0	0	0	0	1	0	1
MIMAT0000899	rno-miR-297	LOC678701			0	1	0	0	0	0	0	1	0	1
MIMAT0000899	rno-miR-297	LOC678740			0	1	0	0	0	0	0	1	0	1
MIMAT0000899	rno-miR-297	LOC678782			0	2	0	0	0	0	0	1	0	1
MIMAT0000899	rno-miR-297	LOC678813	170946	ENSRNOG00000050065	0	1	0	0	0	0	0	1	0	1
MIMAT0000899	rno-miR-297	LOC679552			0	1	0	0	0	0	0	1	0	1
MIMAT0000899	rno-miR-297	LOC679725			0	1	0	0	0	0	0	1	0	1
MIMAT0000899	rno-miR-297	LOC680353	680353	ENSRNOG00000033484	0	1	0	0	0	0	0	1	0	1
MIMAT0000899	rno-miR-297	LOC681198	102549465	ENSRNOG00000040020	0	1	0	0	0	0	0	1	0	1
MIMAT0000899	rno-miR-297	LOC681754	688869	ENSRNOG00000024309	0	1	0	0	0	0	0	1	0	1
MIMAT0000899	rno-miR-297	LOC681963		ENSRNOG00000028804	0	1	0	0	0	0	0	1	0	1
MIMAT0000899	rno-miR-297	LOC682859			0	1	0	0	0	0	0	1	0	1
MIMAT0000899	rno-miR-297	LOC683421			0	2	0	0	0	0	0	1	0	1
MIMAT0000899	rno-miR-297	LOC683549	685680	ENSRNOG00000022136	0	2	0	0	0	0	0	1	0	1
MIMAT0000899	rno-miR-297	LOC684683	295741	ENSRNOG00000033994	0	1	0	0	0	0	0	1	0	1
MIMAT0000899	rno-miR-297	LOC684806		ENSRNOG00000032277	0	1	0	0	0	0	0	1	0	1
MIMAT0000899	rno-miR-297	LOC685513	685513	ENSRNOG00000023899	0	1	0	0	0	0	0	1	0	1
MIMAT0000899	rno-miR-297	LOC685552			0	1	0	0	0	0	0	1	0	1
MIMAT0000899	rno-miR-297	LOC685680	685680	ENSRNOG00000022136	0	2	0	0	0	0	0	1	0	1
MIMAT0000899	rno-miR-297	LOC685888	685888	ENSRNOG00000028087	0	1	0	0	0	0	0	1	0	1
MIMAT0000899	rno-miR-297	LOC686087	317312	ENSRNOG00000002332	0	0	1	0	0	0	0	1	0	1
MIMAT0000899	rno-miR-297	LOC686442	686442	ENSRNOG00000016952	0	1	0	0	0	0	0	1	0	1
MIMAT0000899	rno-miR-297	LOC687401	102557066	ENSRNOG00000029050	0	1	0	0	0	0	0	1	0	1
MIMAT0000899	rno-miR-297	LOC687680	100361715	ENSRNOG00000047766	0	1	0	0	0	0	0	1	0	1
MIMAT0000899	rno-miR-297	LOC687780	100360647	ENSRNOG00000047365	0	1	0	0	0	0	0	1	0	1
MIMAT0000899	rno-miR-297	LOC688684	688684	ENSRNOG00000008516	0	2	0	0	0	0	0	1	0	1
MIMAT0000899	rno-miR-297	LOC688869			0	1	0	0	0	0	0	1	0	1
MIMAT0000899	rno-miR-297	LOC689435		ENSRNOG00000048581	0	1	0	0	0	0	0	1	0	1
MIMAT0000899	rno-miR-297	LOC689657	100911971	ENSRNOG00000026175	0	1	0	0	0	0	0	1	0	1
MIMAT0000899	rno-miR-297	LOC689725	100911971	ENSRNOG00000026175	0	1	0	0	0	0	0	1	0	1
MIMAT0000899	rno-miR-297	LOC690142	690142	ENSRNOG00000025898	0	1	0	0	0	0	0	1	0	1
MIMAT0000899	rno-miR-297	LOC690617	690617	ENSRNOG00000039861	0	1	0	0	0	0	0	1	0	1
MIMAT0000899	rno-miR-297	LOC691195	79449	ENSRNOG00000032803	0	1	0	0	0	0	0	1	0	1
MIMAT0000899	rno-miR-297	LOC691716	100361715	ENSRNOG00000047766	0	1	0	0	0	0	0	1	0	1
MIMAT0000899	rno-miR-297	Lpcat4	296048	ENSRNOG00000005058	0	1	0	0	0	0	0	1	0	1
MIMAT0000899	rno-miR-297	Lpl	24539	ENSRNOG00000012181	0	0	1	0	0	0	0	1	0	1
MIMAT0000899	rno-miR-297	Lrfn4	688721	ENSRNOG00000019356	0	1	0	0	0	0	0	1	0	1
MIMAT0000899	rno-miR-297	Lrfn5	314164	ENSRNOG00000005550	0	1	0	0	0	0	0	1	0	1
MIMAT0000899	rno-miR-297	Lrrfip1	367314	ENSRNOG00000019892	0	1	0	0	0	0	0	1	0	1
MIMAT0000899	rno-miR-297	Ly6c	100911104	ENSRNOG00000023397	0	1	0	0	0	0	0	1	0	1
MIMAT0000899	rno-miR-297	Magi2	113970	ENSRNOG00000013962	0	0	1	0	0	0	0	1	0	1
MIMAT0000899	rno-miR-297	Malsu1	297082	ENSRNOG00000009035	0	1	0	0	0	0	0	1	0	1
MIMAT0000899	rno-miR-297	Marf1	170946	ENSRNOG00000002314	0	1	0	0	0	0	0	1	0	1
MIMAT0000899	rno-miR-297	Marveld3	498950	ENSRNOG00000016291	0	1	0	0	0	0	0	1	0	1
MIMAT0000899	rno-miR-297	MAST1	353118	ENSRNOG00000003469	0	1	0	0	0	0	0	1	0	1
MIMAT0000899	rno-miR-297	Mbd3l1	300389	ENSRNOG00000006363	0	1	0	0	0	0	0	1	0	1
MIMAT0000899	rno-miR-297	Mbtps2	302705	ENSRNOG00000007644	0	1	0	0	0	0	0	1	0	1
MIMAT0000899	rno-miR-297	Mccc1	294972	ENSRNOG00000013293	0	1	0	0	0	0	0	1	0	1
MIMAT0000899	rno-miR-297	Mcee	293829	ENSRNOG00000016327	0	1	0	0	0	0	0	1	0	1
MIMAT0000899	rno-miR-297	Mcf2	102555789	ENSRNOG00000003435	0	1	0	0	0	0	0	1	0	1
MIMAT0000899	rno-miR-297	Mcm3ap_predicted			0	1	0	0	0	0	0	1	0	1
MIMAT0000899	rno-miR-297	Mcmdc2	500392	ENSRNOG00000021702	0	1	0	0	0	0	0	1	0	1
MIMAT0000899	rno-miR-297	Memo1	298787	ENSRNOG00000006340	0	1	0	0	0	0	0	1	0	1
MIMAT0000899	rno-miR-297	Metap2	498869	ENSRNOG00000021881	0	2	0	0	0	0	0	1	0	1
MIMAT0000899	rno-miR-297	Mettl6	290564	ENSRNOG00000057372	0	1	0	0	0	0	0	1	0	1
MIMAT0000899	rno-miR-297	Mfap3	287299	ENSRNOG00000002443	0	0	1	0	0	0	0	1	0	1
MIMAT0000899	rno-miR-297	MGC105567	498873	ENSRNOG00000038955	0	1	0	0	0	0	0	1	0	1
MIMAT0000899	rno-miR-297	Mmp10	117061	ENSRNOG00000032832	0	1	0	0	0	0	0	1	0	1
MIMAT0000899	rno-miR-297	Mmp12	117033	ENSRNOG00000030187	0	1	0	0	0	0	0	1	0	1
MIMAT0000899	rno-miR-297	Mnda	304988	ENSRNOG00000003486	0	1	0	0	0	0	0	1	0	1
MIMAT0000899	rno-miR-297	Morc3_predicted			0	1	0	0	0	0	0	1	0	1
MIMAT0000899	rno-miR-297	Mospd1	317312	ENSRNOG00000002332	0	0	2	0	0	0	0	1	0	1
MIMAT0000899	rno-miR-297	Mreg	501162	ENSRNOG00000015774	0	1	0	0	0	0	0	1	0	1
MIMAT0000899	rno-miR-297	Mrpl19	297372	ENSRNOG00000006968	0	1	0	0	0	0	0	1	0	1
MIMAT0000899	rno-miR-297	Mrps7	113958	ENSRNOG00000003797	0	1	0	0	0	0	0	1	0	1
MIMAT0000899	rno-miR-297	Mrvi1	308899	ENSRNOG00000017767	0	0	0	1	0	0	0	1	0	1
MIMAT0000899	rno-miR-297	Ms4a4c	293746	ENSRNOG00000020997	0	1	0	0	0	0	0	1	0	1
MIMAT0000899	rno-miR-297	Msrb3	680036	ENSRNOG00000042668	0	0	0	1	0	0	0	1	0	1
MIMAT0000899	rno-miR-297	Mtcl1	316764	ENSRNOG00000025527	0	1	0	0	0	0	0	1	0	1
MIMAT0000899	rno-miR-297	Mterfd1	299514	ENSRNOG00000004492	0	1	0	0	0	0	0	1	0	1
MIMAT0000899	rno-miR-297	Mtm1	288762	ENSRNOG00000002516	0	1	0	0	0	0	0	1	0	1
MIMAT0000899	rno-miR-297	Mtnr1b	192646	ENSRNOG00000008972	0	1	0	0	0	0	0	1	0	1
MIMAT0000899	rno-miR-297	Myo1b		ENSRNOG00000015227	0	1	0	0	0	0	0	1	0	1
MIMAT0000899	rno-miR-297	Naa60	363545	ENSRNOG00000007280	0	1	0	0	0	0	0	1	0	1
MIMAT0000899	rno-miR-297	Naalad2	300384	ENSRNOG00000005955	0	1	0	0	0	0	0	1	0	1
MIMAT0000899	rno-miR-297	Ndufs1	301458	ENSRNOG00000011849	0	2	0	0	0	0	0	1	0	1
MIMAT0000899	rno-miR-297	Ndufs2	289218	ENSRNOG00000038372	0	1	0	0	0	0	0	1	0	1
MIMAT0000899	rno-miR-297	Ndufs4	499529	ENSRNOG00000011383	0	0	1	0	0	0	0	1	0	1
MIMAT0000899	rno-miR-297	Neurod2	54276		0	0	1	0	0	0	0	1	0	1
MIMAT0000899	rno-miR-297	Nfatc2_predicted			0	1	0	0	0	0	0	1	0	1
MIMAT0000899	rno-miR-297	Nfe2l3	312331	ENSRNOG00000010886	0	2	0	0	0	0	0	1	0	1
MIMAT0000899	rno-miR-297	Nln	117041	ENSRNOG00000011561	0	0	1	0	0	0	0	1	0	1
MIMAT0000899	rno-miR-297	Nlrp9	292577	ENSRNOG00000021913	0	1	0	0	0	0	0	1	0	1
MIMAT0000899	rno-miR-297	Nme7	171566	ENSRNOG00000002898	0	3	0	0	0	0	0	1	0	1
MIMAT0000899	rno-miR-297	Nmnat1	298653	ENSRNOG00000015962	0	0	0	1	0	0	0	1	0	1
MIMAT0000899	rno-miR-297	Nmnat3	363118	ENSRNOG00000013585	0	1	0	0	0	0	0	1	0	1
MIMAT0000899	rno-miR-297	Noc3l	361753	ENSRNOG00000013965	0	1	0	0	0	0	0	1	0	1
MIMAT0000899	rno-miR-297	Nov	81526	ENSRNOG00000008697	0	0	1	0	0	0	0	1	0	1
MIMAT0000899	rno-miR-297	NP_001000074.1			0	2	0	0	0	0	0	1	0	1
MIMAT0000899	rno-miR-297	NP_001073405.1			0	1	0	0	0	0	0	1	0	1
MIMAT0000899	rno-miR-297	NP_775428.1			0	1	0	0	0	0	0	1	0	1
MIMAT0000899	rno-miR-297	Npuk68			0	1	0	0	0	0	0	1	0	1
MIMAT0000899	rno-miR-297	Nr0b1	58850	ENSRNOG00000003765	0	1	0	0	0	0	0	1	0	1
MIMAT0000899	rno-miR-297	NRAM1_RAT			0	1	0	0	0	0	0	1	0	1
MIMAT0000899	rno-miR-297	Nrip2	689619	ENSRNOG00000042939	0	1	0	0	0	0	0	1	0	1
MIMAT0000899	rno-miR-297	Nrxn1		ENSRNOG00000050220	0	0	0	1	0	0	0	1	0	1
MIMAT0000899	rno-miR-297	Nsdhl	309262	ENSRNOG00000057814	0	0	2	0	0	0	0	1	0	1
MIMAT0000899	rno-miR-297	Nt5dc1	294456	ENSRNOG00000000546	0	1	0	0	0	0	0	1	0	1
MIMAT0000899	rno-miR-297	Obscn	102556059	ENSRNOG00000022790	0	1	0	0	0	0	0	1	0	1
MIMAT0000899	rno-miR-297	Olig2	304103	ENSRNOG00000028658	0	0	0	1	0	0	0	1	0	1
MIMAT0000899	rno-miR-297	Olr104	293243	ENSRNOG00000015876	0	1	0	0	0	0	0	1	0	1
MIMAT0000899	rno-miR-297	Olr1055	288835	ENSRNOG00000030191	0	1	0	0	0	0	0	1	0	1
MIMAT0000899	rno-miR-297	Olr106	293245	ENSRNOG00000015893	0	1	0	0	0	0	0	1	0	1
MIMAT0000899	rno-miR-297	Olr107	293246	ENSRNOG00000015901	0	1	0	0	0	0	0	1	0	1
MIMAT0000899	rno-miR-297	Olr1107_predicted			0	1	0	0	0	0	0	1	0	1
MIMAT0000899	rno-miR-297	Olr1126	405179	ENSRNOG00000030845	0	2	0	0	0	0	0	1	0	1
MIMAT0000899	rno-miR-297	Olr1129	405178	ENSRNOG00000039922	0	1	0	0	0	0	0	1	0	1
MIMAT0000899	rno-miR-297	Olr1156	405171	ENSRNOG00000029802	0	1	0	0	0	0	0	1	0	1
MIMAT0000899	rno-miR-297	Olr1163	405166	ENSRNOG00000030569	0	1	0	0	0	0	0	1	0	1
MIMAT0000899	rno-miR-297	Olr1166	405160	ENSRNOG00000046909	0	1	0	0	0	0	0	1	0	1
MIMAT0000899	rno-miR-297	Olr122	100361642	ENSRNOG00000029978	0	1	0	0	0	0	0	1	0	1
MIMAT0000899	rno-miR-297	Olr1233_predicted			0	1	0	0	0	0	0	1	0	1
MIMAT0000899	rno-miR-297	Olr1244_predicted			0	1	0	0	0	0	0	1	0	1
MIMAT0000899	rno-miR-297	Olr1274_predicted			0	1	0	0	0	0	0	1	0	1
MIMAT0000899	rno-miR-297	Olr1275_predicted			0	1	0	0	0	0	0	1	0	1
MIMAT0000899	rno-miR-297	Olr1389	287240	ENSRNOG00000050601	0	1	0	0	0	0	0	1	0	1
MIMAT0000899	rno-miR-297	Olr141	293280	ENSRNOG00000016946	0	1	0	0	0	0	0	1	0	1
MIMAT0000899	rno-miR-297	Olr1522	404962	ENSRNOG00000030148	0	2	0	0	0	0	0	1	0	1
MIMAT0000899	rno-miR-297	Olr1523	404962	ENSRNOG00000030148	0	2	0	0	0	0	0	1	0	1
MIMAT0000899	rno-miR-297	Olr1609	405328	ENSRNOG00000012526	0	1	0	0	0	0	0	1	0	1
MIMAT0000899	rno-miR-297	Olr167_predicted			0	1	0	0	0	0	0	1	0	1
MIMAT0000899	rno-miR-297	Olr1696	294158	ENSRNOG00000046355	0	1	0	0	0	0	0	1	0	1
MIMAT0000899	rno-miR-297	Olr1734	406018	ENSRNOG00000028849	0	1	0	0	0	0	0	1	0	1
MIMAT0000899	rno-miR-297	Olr1736_predicted			0	1	0	0	0	0	0	1	0	1
MIMAT0000899	rno-miR-297	Olr1765	100911318	ENSRNOG00000030722	0	1	0	0	0	0	0	1	0	1
MIMAT0000899	rno-miR-297	Olr178	293325	ENSRNOG00000017331	0	1	0	0	0	0	0	1	0	1
MIMAT0000899	rno-miR-297	Olr239	293383	ENSRNOG00000030863	0	2	0	0	0	0	0	1	0	1
MIMAT0000899	rno-miR-297	Olr25	404897	ENSRNOG00000046609	0	1	0	0	0	0	0	1	0	1
MIMAT0000899	rno-miR-297	Olr338	293781	ENSRNOG00000048005	0	1	0	0	0	0	0	1	0	1
MIMAT0000899	rno-miR-297	Olr339	405303	ENSRNOG00000012838	0	1	0	0	0	0	0	1	0	1
MIMAT0000899	rno-miR-297	Olr415_predicted			0	1	0	0	0	0	0	1	0	1
MIMAT0000899	rno-miR-297	Olr419	405321	ENSRNOG00000007962	0	1	0	0	0	0	0	1	0	1
MIMAT0000899	rno-miR-297	Olr470	295741	ENSRNOG00000033994	0	1	0	0	0	0	0	1	0	1
MIMAT0000899	rno-miR-297	Olr479	295748	ENSRNOG00000049794	0	1	0	0	0	0	0	1	0	1
MIMAT0000899	rno-miR-297	Olr515	295768	ENSRNOG00000032722	0	2	0	0	0	0	0	1	0	1
MIMAT0000899	rno-miR-297	Olr520_predicted			0	1	0	0	0	0	0	1	0	1
MIMAT0000899	rno-miR-297	Olr569	100911380	ENSRNOG00000046501	0	1	0	0	0	0	0	1	0	1
MIMAT0000899	rno-miR-297	Olr578	366109	ENSRNOG00000050566	0	1	0	0	0	0	0	1	0	1
MIMAT0000899	rno-miR-297	Olr582	404862	ENSRNOG00000046448	0	1	0	0	0	0	0	1	0	1
MIMAT0000899	rno-miR-297	Olr598	100911380	ENSRNOG00000046501	0	1	0	0	0	0	0	1	0	1
MIMAT0000899	rno-miR-297	Olr609	295835	ENSRNOG00000050679	0	1	0	0	0	0	0	1	0	1
MIMAT0000899	rno-miR-297	Olr621_predicted			0	2	0	0	0	0	0	1	0	1
MIMAT0000899	rno-miR-297	Olr621	100910893	ENSRNOG00000047515	0	1	0	0	0	0	0	1	0	1
MIMAT0000899	rno-miR-297	Olr633	404844	ENSRNOG00000049129	0	1	0	0	0	0	0	1	0	1
MIMAT0000899	rno-miR-297	Olr635	100910893	ENSRNOG00000047515	0	1	0	0	0	0	0	1	0	1
MIMAT0000899	rno-miR-297	Olr637	100910893	ENSRNOG00000047515	0	1	0	0	0	0	0	1	0	1
MIMAT0000899	rno-miR-297	Olr640	100910893	ENSRNOG00000047515	0	1	0	0	0	0	0	1	0	1
MIMAT0000899	rno-miR-297	Olr649_predicted			0	1	0	0	0	0	0	1	0	1
MIMAT0000899	rno-miR-297	Olr666	295876	ENSRNOG00000049947	0	1	0	0	0	0	0	1	0	1
MIMAT0000899	rno-miR-297	Olr687	295892	ENSRNOG00000050195	0	1	0	0	0	0	0	1	0	1
MIMAT0000899	rno-miR-297	Olr7	405043	ENSRNOG00000015289	0	2	0	0	0	0	0	1	0	1
MIMAT0000899	rno-miR-297	Olr70	293215	ENSRNOG00000015673	0	1	0	0	0	0	0	1	0	1
MIMAT0000899	rno-miR-297	Olr780	404795	ENSRNOG00000048669	0	1	0	0	0	0	0	1	0	1
MIMAT0000899	rno-miR-297	Olr801	405143	ENSRNOG00000049273	0	2	0	0	0	0	0	1	0	1
MIMAT0000899	rno-miR-297	Olr802_predicted			0	1	0	0	0	0	0	1	0	1
MIMAT0000899	rno-miR-297	Olr803	405143	ENSRNOG00000049273	0	2	0	0	0	0	0	1	0	1
MIMAT0000899	rno-miR-297	Olr898	288811	ENSRNOG00000046110	0	1	0	0	0	0	0	1	0	1
MIMAT0000899	rno-miR-297	Olr956_predicted			0	1	0	0	0	0	0	1	0	1
MIMAT0000899	rno-miR-297	Olr987	366810	ENSRNOG00000050676	0	1	0	0	0	0	0	1	0	1
MIMAT0000899	rno-miR-297	Oosp2	690888	ENSRNOG00000036624	0	1	0	0	0	0	0	1	0	1
MIMAT0000899	rno-miR-297	Oprm1	25601	ENSRNOG00000018191	0	1	0	0	0	0	0	1	0	1
MIMAT0000899	rno-miR-297	Oprs1			0	2	0	0	0	0	0	1	0	1
MIMAT0000899	rno-miR-297	Otof	84573	ENSRNOG00000009967	0	1	0	0	0	0	0	1	0	1
MIMAT0000899	rno-miR-297	Oxgr1	290493	ENSRNOG00000037884	0	1	0	0	0	0	0	1	0	1
MIMAT0000899	rno-miR-297	Oxtr	25342	ENSRNOG00000005806	0	1	0	0	0	0	0	1	0	1
MIMAT0000899	rno-miR-297	P22k15	296229	ENSRNOG00000030184	0	0	1	0	0	0	0	1	0	1
MIMAT0000899	rno-miR-297	P97673_RAT			0	1	0	0	0	0	0	1	0	1
MIMAT0000899	rno-miR-297	Pabpc4l	295010	ENSRNOG00000029749	0	1	0	0	0	0	0	1	0	1
MIMAT0000899	rno-miR-297	Pank3	360511	ENSRNOG00000007419	0	0	0	1	0	0	0	1	0	1
MIMAT0000899	rno-miR-297	Pappa_predicted			0	1	0	0	0	0	0	1	0	1
MIMAT0000899	rno-miR-297	Pard3	81918	ENSRNOG00000032437	0	1	0	0	0	0	0	1	0	1
MIMAT0000899	rno-miR-297	Pbld1	100360692	ENSRNOG00000000386	0	1	0	0	0	0	0	1	0	1
MIMAT0000899	rno-miR-297	Pde1c	81742	ENSRNOG00000012337	0	1	0	0	0	0	0	1	0	1
MIMAT0000899	rno-miR-297	Pde4b	24626	ENSRNOG00000005905	0	1	0	0	0	0	0	1	0	1
MIMAT0000899	rno-miR-297	Pdha1	29554	ENSRNOG00000025383	0	0	1	0	0	0	0	1	0	1
MIMAT0000899	rno-miR-297	Pdha1l1	29554	ENSRNOG00000025383	0	0	1	0	0	0	0	1	0	1
MIMAT0000899	rno-miR-297	Pdp1	54705	ENSRNOG00000016180	0	0	1	0	0	0	0	1	0	1
MIMAT0000899	rno-miR-297	Pex1	500006	ENSRNOG00000025991	0	1	0	0	0	0	0	1	0	1
MIMAT0000899	rno-miR-297	Pex7	308718	ENSRNOG00000012322	0	0	1	0	0	0	0	1	0	1
MIMAT0000899	rno-miR-297	Picalm	89816	ENSRNOG00000018322	0	0	1	0	0	0	0	1	0	1
MIMAT0000899	rno-miR-297	Pign	309051	ENSRNOG00000014866	0	1	0	0	0	0	0	1	0	1
MIMAT0000899	rno-miR-297	Pih1d2	315645	ENSRNOG00000009965	0	1	0	0	0	0	0	1	0	1
MIMAT0000899	rno-miR-297	Pih1d3	315915	ENSRNOG00000054900	0	0	1	0	0	0	0	1	0	1
MIMAT0000899	rno-miR-297	Pkhd1l1	314917	ENSRNOG00000004398	0	1	0	0	0	0	0	1	0	1
MIMAT0000899	rno-miR-297	Pkib	24678	ENSRNOG00000000811	0	0	3	0	0	0	0	1	0	1
MIMAT0000899	rno-miR-297	Plekhb2	301337	ENSRNOG00000014162	0	0	0	1	0	0	0	1	0	1
MIMAT0000899	rno-miR-297	Plscr4	300900	ENSRNOG00000008151	0	0	1	0	0	0	0	1	0	1
MIMAT0000899	rno-miR-297	Pmaip1	492821	ENSRNOG00000018770	0	1	0	0	0	0	0	1	0	1
MIMAT0000899	rno-miR-297	Pmp22	24660	ENSRNOG00000003338	0	0	1	0	0	0	0	1	0	1
MIMAT0000899	rno-miR-297	Pmpcb	64198	ENSRNOG00000012693	0	1	0	0	0	0	0	1	0	1
MIMAT0000899	rno-miR-297	Pnck	29660	ENSRNOG00000058317	0	2	0	0	0	0	0	1	0	1
MIMAT0000899	rno-miR-297	Pnma2	305977	ENSRNOG00000009815	0	1	0	0	0	0	0	1	0	1
MIMAT0000899	rno-miR-297	Podn	102552895	ENSRNOG00000046561	0	2	0	0	0	0	0	1	0	1
MIMAT0000899	rno-miR-297	Podxl2_predicted			0	1	0	0	0	0	0	1	0	1
MIMAT0000899	rno-miR-297	Poln	102555079	ENSRNOG00000027929	0	1	0	0	0	0	0	1	0	1
MIMAT0000899	rno-miR-297	Polr3d	306012	ENSRNOG00000010028	0	1	0	0	0	0	0	1	0	1
MIMAT0000899	rno-miR-297	Porcn	317368	ENSRNOG00000004819	0	0	0	1	0	0	0	1	0	1
MIMAT0000899	rno-miR-297	Ppm1e	360593	ENSRNOG00000024730	0	1	0	0	0	0	0	1	0	1
MIMAT0000899	rno-miR-297	Ppm1n	292690	ENSRNOG00000016599	0	1	0	0	0	0	0	1	0	1
MIMAT0000899	rno-miR-297	Ppp1r36	299153	ENSRNOG00000038480	0	1	0	0	0	0	0	1	0	1
MIMAT0000899	rno-miR-297	Pqlc3	298906	ENSRNOG00000005126	0	1	0	0	0	0	0	1	0	1
MIMAT0000899	rno-miR-297	Prdm4	170820	ENSRNOG00000004962	0	1	0	0	0	0	0	1	0	1
MIMAT0000899	rno-miR-297	Prdm5	689788	ENSRNOG00000023679	0	2	0	0	0	0	0	1	0	1
MIMAT0000899	rno-miR-297	Prmt8	688502	ENSRNOG00000053804	0	1	0	0	0	0	0	1	0	1
MIMAT0000899	rno-miR-297	Prol1	65182	ENSRNOG00000023578	0	2	0	0	0	0	0	1	0	1
MIMAT0000899	rno-miR-297	Prpf4	298095	ENSRNOG00000014777	0	1	0	0	0	0	0	1	0	1
MIMAT0000899	rno-miR-297	Prr27	289530	ENSRNOG00000023342	0	1	0	0	0	0	0	1	0	1
MIMAT0000899	rno-miR-297	Psma5	29672	ENSRNOG00000019868	0	0	1	0	0	0	0	1	0	1
MIMAT0000899	rno-miR-297	Psmd9	161475	ENSRNOG00000001339	0	2	0	0	0	0	0	1	0	1
MIMAT0000899	rno-miR-297	Ptch1	89830	ENSRNOG00000019354	0	1	0	0	0	0	0	1	0	1
MIMAT0000899	rno-miR-297	Ptchd1_predicted			0	1	0	0	0	0	0	1	0	1
MIMAT0000899	rno-miR-297	Ptpru	116680	ENSRNOG00000013515	0	1	0	0	0	0	0	1	0	1
MIMAT0000899	rno-miR-297	Pts	29498	ENSRNOG00000009250	0	1	0	0	0	0	0	1	0	1
MIMAT0000899	rno-miR-297	Q38PG1_RAT			0	1	0	0	0	0	0	1	0	1
MIMAT0000899	rno-miR-297	Q5M928_RAT			0	1	0	0	0	0	0	1	0	1
MIMAT0000899	rno-miR-297	Q63172_RAT			0	1	0	0	0	0	0	1	0	1
MIMAT0000899	rno-miR-297	Q63290_RAT			0	1	0	0	0	0	0	1	0	1
MIMAT0000899	rno-miR-297	Q6QI42_RAT			0	1	0	0	0	0	0	1	0	1
MIMAT0000899	rno-miR-297	Q9D6J0_MOUSE			0	1	0	0	0	0	0	1	0	1
MIMAT0000899	rno-miR-297	Q9Z2B7_RAT			0	1	0	0	0	0	0	1	0	1
MIMAT0000899	rno-miR-297	Rab39a	315668	ENSRNOG00000009008	0	1	0	0	0	0	0	1	0	1
MIMAT0000899	rno-miR-297	Rab3a	25531	ENSRNOG00000019433	0	0	1	0	0	0	0	1	0	1
MIMAT0000899	rno-miR-297	Rab5a	64633	ENSRNOG00000005028	0	0	1	0	0	0	0	1	0	1
MIMAT0000899	rno-miR-297	Rab5al1	64633	ENSRNOG00000005028	0	0	1	0	0	0	0	1	0	1
MIMAT0000899	rno-miR-297	Rab7a	29448	ENSRNOG00000012247	0	0	0	1	0	0	0	1	0	1
MIMAT0000899	rno-miR-297	Rab9b_predicted			0	4	0	0	0	0	0	1	0	1
MIMAT0000899	rno-miR-297	Rab9b	367915	ENSRNOG00000047960	0	0	0	1	0	0	0	1	0	1
MIMAT0000899	rno-miR-297	Rad17	310034	ENSRNOG00000018353	0	0	1	0	0	0	0	1	0	1
MIMAT0000899	rno-miR-297	Rap1a	295347	ENSRNOG00000032463	0	0	1	0	0	0	0	1	0	1
MIMAT0000899	rno-miR-297	Raver1h			0	1	0	0	0	0	0	1	0	1
MIMAT0000899	rno-miR-297	Rbms3	680726	ENSRNOG00000025881	0	2	0	0	0	0	0	1	0	1
MIMAT0000899	rno-miR-297	Rdm1	287726	ENSRNOG00000020751	0	1	0	0	0	0	0	1	0	1
MIMAT0000899	rno-miR-297	Rfwd2	360860	ENSRNOG00000042492	0	1	0	0	0	0	0	1	0	1
MIMAT0000899	rno-miR-297	Rgag4		ENSRNOG00000045779	0	1	0	0	0	0	0	1	0	1
MIMAT0000899	rno-miR-297	RGD1305685			0	1	0	0	0	0	0	1	0	1
MIMAT0000899	rno-miR-297	RGD1306704_predicted			0	1	0	0	0	0	0	1	0	1
MIMAT0000899	rno-miR-297	RGD1307234_predicted			0	1	0	0	0	0	0	1	0	1
MIMAT0000899	rno-miR-297	RGD1307844_predicted			0	1	0	0	0	0	0	1	0	1
MIMAT0000899	rno-miR-297	RGD1308745_predicted			0	1	0	0	0	0	0	1	0	1
MIMAT0000899	rno-miR-297	RGD1309624_predicted			0	1	0	0	0	0	0	1	0	1
MIMAT0000899	rno-miR-297	RGD1310335	360711	ENSRNOG00000039183	0	0	0	1	0	0	0	1	0	1
MIMAT0000899	rno-miR-297	RGD1311045_predicted			0	1	0	0	0	0	0	1	0	1
MIMAT0000899	rno-miR-297	RGD1311595	309307	ENSRNOG00000026942	0	1	0	0	0	0	0	1	0	1
MIMAT0000899	rno-miR-297	RGD1311815			0	1	0	0	0	0	0	1	0	1
MIMAT0000899	rno-miR-297	RGD1359592			0	1	0	0	0	0	0	1	0	1
MIMAT0000899	rno-miR-297	RGD1559864	500446	ENSRNOG00000000129	0	2	0	0	0	0	0	1	0	1
MIMAT0000899	rno-miR-297	RGD1560073	314054	ENSRNOG00000034175	0	1	0	0	0	0	0	1	0	1
MIMAT0000899	rno-miR-297	RGD1560291_predicted			0	1	0	0	0	0	0	1	0	1
MIMAT0000899	rno-miR-297	RGD1560291	299656	ENSRNOG00000009241	0	1	0	0	0	0	0	1	0	1
MIMAT0000899	rno-miR-297	RGD1560341	498869	ENSRNOG00000021881	0	1	0	0	0	0	0	1	0	1
MIMAT0000899	rno-miR-297	RGD1560432_predicted			0	1	0	0	0	0	0	1	0	1
MIMAT0000899	rno-miR-297	RGD1560519_predicted			0	1	0	0	0	0	0	1	0	1
MIMAT0000899	rno-miR-297	RGD1560636_predicted			0	1	0	0	0	0	0	1	0	1
MIMAT0000899	rno-miR-297	RGD1560730	292928	ENSRNOG00000014266	0	1	0	0	0	0	0	1	0	1
MIMAT0000899	rno-miR-297	RGD1561320_predicted			0	1	0	0	0	0	0	1	0	1
MIMAT0000899	rno-miR-297	RGD1561510_predicted			0	1	0	0	0	0	0	1	0	1
MIMAT0000899	rno-miR-297	RGD1561757_predicted			0	2	0	0	0	0	0	1	0	1
MIMAT0000899	rno-miR-297	RGD1561931	302396	ENSRNOG00000021589	0	1	0	0	0	0	0	1	0	1
MIMAT0000899	rno-miR-297	RGD1561958	363490	ENSRNOG00000022411	0	1	0	0	0	0	0	1	0	1
MIMAT0000899	rno-miR-297	RGD1562039_predicted			0	1	0	0	0	0	0	1	0	1
MIMAT0000899	rno-miR-297	RGD1562063	500896	ENSRNOG00000033520	0	1	0	0	0	0	0	1	0	1
MIMAT0000899	rno-miR-297	RGD1562127_predicted			0	1	0	0	0	0	0	1	0	1
MIMAT0000899	rno-miR-297	RGD1562200	363471	ENSRNOG00000026157	0	1	0	0	0	0	0	1	0	1
MIMAT0000899	rno-miR-297	RGD1562235_predicted			0	1	0	0	0	0	0	1	0	1
MIMAT0000899	rno-miR-297	RGD1562469	79449	ENSRNOG00000029410	0	1	0	0	0	0	0	1	0	1
MIMAT0000899	rno-miR-297	RGD1562521_predicted			0	1	0	0	0	0	0	1	0	1
MIMAT0000899	rno-miR-297	RGD1562533_predicted			0	1	0	0	0	0	0	1	0	1
MIMAT0000899	rno-miR-297	RGD1562658_predicted			0	1	0	0	0	0	0	1	0	1
MIMAT0000899	rno-miR-297	RGD1562697_predicted			0	1	0	0	0	0	0	1	0	1
MIMAT0000899	rno-miR-297	RGD1562868_predicted			0	1	0	0	0	0	0	1	0	1
MIMAT0000899	rno-miR-297	RGD1563048_predicted			0	2	0	0	0	0	0	1	0	1
MIMAT0000899	rno-miR-297	RGD1563072	100912566	ENSRNOG00000021609	0	1	0	0	0	0	0	1	0	1
MIMAT0000899	rno-miR-297	RGD1563222	362175	ENSRNOG00000010963	0	1	0	0	0	0	0	1	0	1
MIMAT0000899	rno-miR-297	RGD1564018		ENSRNOG00000022308	0	1	0	0	0	0	0	1	0	1
MIMAT0000899	rno-miR-297	RGD1564110_predicted			0	2	0	0	0	0	0	1	0	1
MIMAT0000899	rno-miR-297	RGD1564947_predicted			0	1	0	0	0	0	0	1	0	1
MIMAT0000899	rno-miR-297	RGD1565131	498143	ENSRNOG00000025212	0	1	0	0	0	0	0	1	0	1
MIMAT0000899	rno-miR-297	RGD1565820_predicted			0	1	0	0	0	0	0	1	0	1
MIMAT0000899	rno-miR-297	RGD1565890_predicted			0	1	0	0	0	0	0	1	0	1
MIMAT0000899	rno-miR-297	RGD1565984_predicted			0	1	0	0	0	0	0	1	0	1
MIMAT0000899	rno-miR-297	RGD1566016_predicted			0	1	0	0	0	0	0	1	0	1
MIMAT0000899	rno-miR-297	RGD1566029	500913	ENSRNOG00000052725	0	0	0	1	0	0	0	1	0	1
MIMAT0000899	rno-miR-297	RGD1566117_predicted			0	1	0	0	0	0	0	1	0	1
MIMAT0000899	rno-miR-297	RGD1566272_predicted			0	1	0	0	0	0	0	1	0	1
MIMAT0000899	rno-miR-297	Rgn	25106	ENSRNOG00000007949	0	0	1	0	0	0	0	1	0	1
MIMAT0000899	rno-miR-297	Rimklb	362428	ENSRNOG00000023814	0	0	0	1	0	0	0	1	0	1
MIMAT0000899	rno-miR-297	Rims2	116839	ENSRNOG00000004201	0	0	2	0	0	0	0	1	0	1
MIMAT0000899	rno-miR-297	Riok3	361293	ENSRNOG00000023376	0	1	0	0	0	0	0	1	0	1
MIMAT0000899	rno-miR-297	Rnf146	308051	ENSRNOG00000011588	0	0	1	0	0	0	0	1	0	1
MIMAT0000899	rno-miR-297	Rock2	25537	ENSRNOG00000004496	0	0	0	1	0	0	0	1	0	1
MIMAT0000899	rno-miR-297	Rpe	501157	ENSRNOG00000038085	0	0	1	0	0	0	0	1	0	1
MIMAT0000899	rno-miR-297	Rpe65	89826	ENSRNOG00000009582	0	1	0	0	0	0	0	1	0	1
MIMAT0000899	rno-miR-297	Rpgrip1l	307724	ENSRNOG00000011829	0	0	0	1	0	0	0	1	0	1
MIMAT0000899	rno-miR-297	Rpl21	79449	ENSRNOG00000029410	0	1	0	0	0	0	0	1	0	1
MIMAT0000899	rno-miR-297	Rpl38	682793	ENSRNOG00000029377	0	1	0	0	0	0	0	1	0	1
MIMAT0000899	rno-miR-297	Rpl39	25347	ENSRNOG00000034237	0	1	0	0	0	0	0	1	0	1
MIMAT0000899	rno-miR-297	Rpl5l1	501206	ENSRNOG00000037220	0	1	0	0	0	0	0	1	0	1
MIMAT0000899	rno-miR-297	Rps15al4	100361715	ENSRNOG00000047766	0	1	0	0	0	0	0	1	0	1
MIMAT0000899	rno-miR-297	Rrad	83521	ENSRNOG00000011901	0	1	0	0	0	0	0	1	0	1
MIMAT0000899	rno-miR-297	Rspo1	313589	ENSRNOG00000009656	0	1	0	0	0	0	0	1	0	1
MIMAT0000899	rno-miR-297	RT1-CE12			0	1	0	0	0	0	0	1	0	1
MIMAT0000899	rno-miR-297	RT1-CE4	414783	ENSRNOG00000039744	0	1	0	0	0	0	0	1	0	1
MIMAT0000899	rno-miR-297	Runx2	367218	ENSRNOG00000020193	0	1	0	0	0	0	0	1	0	1
MIMAT0000899	rno-miR-297	S100a7a	685479	ENSRNOG00000033352	0	1	0	0	0	0	0	1	0	1
MIMAT0000899	rno-miR-297	Sarnp	362819	ENSRNOG00000030520	0	1	0	0	0	0	0	1	0	1
MIMAT0000899	rno-miR-297	Scp2	102552895	ENSRNOG00000046561	0	2	0	0	0	0	0	1	0	1
MIMAT0000899	rno-miR-297	Sec24b	295461	ENSRNOG00000023373	0	1	0	0	0	0	0	1	0	1
MIMAT0000899	rno-miR-297	Selk	290549	ENSRNOG00000014624	0	1	0	0	0	0	0	1	0	1
MIMAT0000899	rno-miR-297	Serpina3c	24794	ENSRNOG00000010410	0	1	0	0	0	0	0	1	0	1
MIMAT0000899	rno-miR-297	Serpina3k			0	1	0	0	0	0	0	1	0	1
MIMAT0000899	rno-miR-297	Serpinb3a	498209	ENSRNOG00000002578	0	1	0	0	0	0	0	1	0	1
MIMAT0000899	rno-miR-297	Serpinh1	29345	ENSRNOG00000016831	0	0	1	0	0	0	0	1	0	1
MIMAT0000899	rno-miR-297	Sfrs12			0	2	0	0	0	0	0	1	0	1
MIMAT0000899	rno-miR-297	Sfxn3	65042	ENSRNOG00000015442	0	1	0	0	0	0	0	1	0	1
MIMAT0000899	rno-miR-297	Sgca_predicted			0	1	0	0	0	0	0	1	0	1
MIMAT0000899	rno-miR-297	Sgtb	294708	ENSRNOG00000011937	0	1	0	0	0	0	0	1	0	1
MIMAT0000899	rno-miR-297	Si	497756	ENSRNOG00000031067	0	1	0	0	0	0	0	1	0	1
MIMAT0000899	rno-miR-297	Siglec8		ENSRNOG00000022640	0	1	0	0	0	0	0	1	0	1
MIMAT0000899	rno-miR-297	Sipa1l2	361442	ENSRNOG00000019791	0	0	1	0	0	0	0	1	0	1
MIMAT0000899	rno-miR-297	Slc10a7	291942	ENSRNOG00000011991	0	1	0	0	0	0	0	1	0	1
MIMAT0000899	rno-miR-297	Slc15a2	60577	ENSRNOG00000002305	0	0	1	0	0	0	0	1	0	1
MIMAT0000899	rno-miR-297	Slc20a2	29502	ENSRNOG00000019490	0	0	0	1	0	0	0	1	0	1
MIMAT0000899	rno-miR-297	Slc24a4_predicted			0	1	0	0	0	0	0	1	0	1
MIMAT0000899	rno-miR-297	Slc26a6	301010	ENSRNOG00000020450	0	1	0	0	0	0	0	1	0	1
MIMAT0000899	rno-miR-297	Slc28a3	140944	ENSRNOG00000018853	0	1	0	0	0	0	0	1	0	1
MIMAT0000899	rno-miR-297	Slc3a1	29484	ENSRNOG00000007006	0	1	0	0	0	0	0	1	0	1
MIMAT0000899	rno-miR-297	Slc43a1	311168	ENSRNOG00000008243	0	1	0	0	0	0	0	1	0	1
MIMAT0000899	rno-miR-297	Slc43a3	311170	ENSRNOG00000061768	0	1	0	0	0	0	0	1	0	1
MIMAT0000899	rno-miR-297	Slc6a19	664630	ENSRNOG00000026501	0	2	0	0	0	0	0	1	0	1
MIMAT0000899	rno-miR-297	Slc6a8	50690	ENSRNOG00000057620	0	0	1	0	0	0	0	1	0	1
MIMAT0000899	rno-miR-297	Slc7a1	25648	ENSRNOG00000000924	0	1	0	0	0	0	0	1	0	1
MIMAT0000899	rno-miR-297	Slc9c2		ENSRNOG00000026797	0	1	0	0	0	0	0	1	0	1
MIMAT0000899	rno-miR-297	Slco1a6	84608	ENSRNOG00000030894	0	0	1	0	0	0	0	1	0	1
MIMAT0000899	rno-miR-297	Slco3a1	140915	ENSRNOG00000032798	0	1	0	0	0	0	0	1	0	1
MIMAT0000899	rno-miR-297	Smco2		ENSRNOG00000026883	0	1	0	0	0	0	0	1	0	1
MIMAT0000899	rno-miR-297	Smp2a			0	1	0	0	0	0	0	1	0	1
MIMAT0000899	rno-miR-297	Smtnl1	311167	ENSRNOG00000007516	0	1	0	0	0	0	0	1	0	1
MIMAT0000899	rno-miR-297	Snai3	307919	ENSRNOG00000013586	0	1	0	0	0	0	0	1	0	1
MIMAT0000899	rno-miR-297	Sorcs3_predicted			0	1	0	0	0	0	0	1	0	1
MIMAT0000899	rno-miR-297	Sox6	293165	ENSRNOG00000020514	0	0	1	0	0	0	0	1	0	1
MIMAT0000899	rno-miR-297	Spg21	300791	ENSRNOG00000015019	0	0	1	0	0	0	0	1	0	1
MIMAT0000899	rno-miR-297	Spg3a			0	1	0	0	0	0	0	1	0	1
MIMAT0000899	rno-miR-297	Spidr	498119	ENSRNOG00000037851	0	2	0	0	0	0	0	1	0	1
MIMAT0000899	rno-miR-297	Spr	29270	ENSRNOG00000015455	0	1	0	0	0	0	0	1	0	1
MIMAT0000899	rno-miR-297	Spry2	306141	ENSRNOG00000010058	0	0	1	0	0	0	0	1	0	1
MIMAT0000899	rno-miR-297	Sptlc3	296188	ENSRNOG00000004443	0	1	0	0	0	0	0	1	0	1
MIMAT0000899	rno-miR-297	Srd5a3	305291	ENSRNOG00000002216	0	2	0	0	0	0	0	1	0	1
MIMAT0000899	rno-miR-297	Srek1	56763	ENSRNOG00000032735	0	1	0	0	0	0	0	1	0	1
MIMAT0000899	rno-miR-297	Ssbp2	361877	ENSRNOG00000016213	0	1	0	0	0	0	0	1	0	1
MIMAT0000899	rno-miR-297	Ssh1	304580	ENSRNOG00000000695	0	1	0	0	0	0	0	1	0	1
MIMAT0000899	rno-miR-297	Sspn	500364	ENSRNOG00000001807	0	1	0	0	0	0	0	1	0	1
MIMAT0000899	rno-miR-297	Ssu72	298681	ENSRNOG00000017829	0	1	0	0	0	0	0	1	0	1
MIMAT0000899	rno-miR-297	Steap4	499991	ENSRNOG00000008602	0	1	0	0	0	0	0	1	0	1
MIMAT0000899	rno-miR-297	Stk4_predicted			0	1	0	0	0	0	0	1	0	1
MIMAT0000899	rno-miR-297	Stno_predicted			0	1	0	0	0	0	0	1	0	1
MIMAT0000899	rno-miR-297	Sts	24800	ENSRNOG00000032487	0	1	0	0	0	0	0	1	0	1
MIMAT0000899	rno-miR-297	Sv2a	117559	ENSRNOG00000021182	0	1	0	0	0	0	0	1	0	1
MIMAT0000899	rno-miR-297	Taf3	116550	ENSRNOG00000019223	0	1	0	0	0	0	0	1	0	1
MIMAT0000899	rno-miR-297	Tagln	25123	ENSRNOG00000017628	0	1	0	0	0	0	0	1	0	1
MIMAT0000899	rno-miR-297	Tas2r140	689869	ENSRNOG00000021329	0	1	0	0	0	0	0	1	0	1
MIMAT0000899	rno-miR-297	Tbck	295446	ENSRNOG00000011454	0	1	0	0	0	0	0	1	0	1
MIMAT0000899	rno-miR-297	Tceal8	367909	ENSRNOG00000028585	0	1	0	0	0	0	0	1	0	1
MIMAT0000899	rno-miR-297	Tf	24825	ENSRNOG00000030625	0	1	0	0	0	0	0	1	0	1
MIMAT0000899	rno-miR-297	Tgif1	316742	ENSRNOG00000015906	0	1	0	0	0	0	0	1	0	1
MIMAT0000899	rno-miR-297	Thap1	306547	ENSRNOG00000056956	0	1	0	0	0	0	0	1	0	1
MIMAT0000899	rno-miR-297	Thnsl2	297332	ENSRNOG00000006508	0	1	0	0	0	0	0	1	0	1
MIMAT0000899	rno-miR-297	Timd2	287222	ENSRNOG00000021345	0	2	0	0	0	0	0	1	0	1
MIMAT0000899	rno-miR-297	Timm10	64464	ENSRNOG00000007883	0	1	0	0	0	0	0	1	0	1
MIMAT0000899	rno-miR-297	Tmc2	296153	ENSRNOG00000007017	0	1	0	0	0	0	0	1	0	1
MIMAT0000899	rno-miR-297	Tmed5	289883	ENSRNOG00000000073	0	1	0	0	0	0	0	1	0	1
MIMAT0000899	rno-miR-297	Tmem165	364137	ENSRNOG00000002199	0	0	2	0	0	0	0	1	0	1
MIMAT0000899	rno-miR-297	Tmod2	58814	ENSRNOG00000010447	0	1	0	0	0	0	0	1	0	1
MIMAT0000899	rno-miR-297	Tmprss11e	305265	ENSRNOG00000022255	0	1	0	0	0	0	0	1	0	1
MIMAT0000899	rno-miR-297	Tmx1	362751	ENSRNOG00000057934	0	0	1	0	0	0	0	1	0	1
MIMAT0000899	rno-miR-297	Tnfrsf13b		ENSRNOG00000002304	0	1	0	0	0	0	0	1	0	1
MIMAT0000899	rno-miR-297	Tnfrsf5			0	1	0	0	0	0	0	1	0	1
MIMAT0000899	rno-miR-297	Tnip3	689756	ENSRNOG00000054524	0	0	0	1	0	0	0	1	0	1
MIMAT0000899	rno-miR-297	Toe1_predicted			0	1	0	0	0	0	0	1	0	1
MIMAT0000899	rno-miR-297	Tomt	308868	ENSRNOG00000023434	0	1	0	0	0	0	0	1	0	1
MIMAT0000899	rno-miR-297	Tram1	312903	ENSRNOG00000007892	0	0	1	0	0	0	0	1	0	1
MIMAT0000899	rno-miR-297	Trappc6b	299075	ENSRNOG00000004103	0	1	0	0	0	0	0	1	0	1
MIMAT0000899	rno-miR-297	Trdn	59299	ENSRNOG00000012609	0	0	2	0	0	0	0	1	0	1
MIMAT0000899	rno-miR-297	Trim27		ENSRNOG00000018622	0	1	0	0	0	0	0	1	0	1
MIMAT0000899	rno-miR-297	Trmt6	311441	ENSRNOG00000021270	0	1	0	0	0	0	0	1	0	1
MIMAT0000899	rno-miR-297	Trp53bp1_predicted			0	1	0	0	0	0	0	1	0	1
MIMAT0000899	rno-miR-297	Trpm6	293874	ENSRNOG00000013053	0	1	0	0	0	0	0	1	0	1
MIMAT0000899	rno-miR-297	Tsc22d3	83514	ENSRNOG00000056135	0	2	0	0	0	0	0	1	0	1
MIMAT0000899	rno-miR-297	Tulp4	499016	ENSRNOG00000018012	0	1	0	0	0	0	0	1	0	1
MIMAT0000899	rno-miR-297	Tyr	308800	ENSRNOG00000016421	0	1	0	0	0	0	0	1	0	1
MIMAT0000899	rno-miR-297	Ubap2l	361984	ENSRNOG00000017990	0	1	0	0	0	0	0	1	0	1
MIMAT0000899	rno-miR-297	Ube2a	298317	ENSRNOG00000039985	0	0	1	0	0	0	0	1	0	1
MIMAT0000899	rno-miR-297	Ube2b	298317	ENSRNOG00000005064	0	0	1	0	0	0	0	1	0	1
MIMAT0000899	rno-miR-297	Ube2g1	64631	ENSRNOG00000010041	0	0	1	0	0	0	0	1	0	1
MIMAT0000899	rno-miR-297	Uchl5	360853	ENSRNOG00000003545	0	1	0	0	0	0	0	1	0	1
MIMAT0000899	rno-miR-297	Uck2	304944	ENSRNOG00000003917	0	1	0	0	0	0	0	1	0	1
MIMAT0000899	rno-miR-297	Ugt2b	24862	ENSRNOG00000046540	0	1	0	0	0	0	0	1	0	1
MIMAT0000899	rno-miR-297	Ugt2b10	305264	ENSRNOG00000029007	0	1	0	0	0	0	0	1	0	1
MIMAT0000899	rno-miR-297	Ugt2b15	24862	ENSRNOG00000046540	0	1	0	0	0	0	0	1	0	1
MIMAT0000899	rno-miR-297	Ulk4	363167	ENSRNOG00000019271	0	1	0	0	0	0	0	1	0	1
MIMAT0000899	rno-miR-297	Upf2_predicted			0	1	0	0	0	0	0	1	0	1
MIMAT0000899	rno-miR-297	Upf2		ENSRNOG00000023593	0	1	0	0	0	0	0	1	0	1
MIMAT0000899	rno-miR-297	Uqcr11	686442	ENSRNOG00000016952	0	1	0	0	0	0	0	1	0	1
MIMAT0000899	rno-miR-297	Usp1	313387	ENSRNOG00000007890	0	0	1	0	0	0	0	1	0	1
MIMAT0000899	rno-miR-297	Usp25	304150	ENSRNOG00000001573	0	0	0	1	0	0	0	1	0	1
MIMAT0000899	rno-miR-297	Usp37	100361658	ENSRNOG00000022720	0	1	0	0	0	0	0	1	0	1
MIMAT0000899	rno-miR-297	Usp42	288482	ENSRNOG00000001059	0	1	0	0	0	0	0	1	0	1
MIMAT0000899	rno-miR-297	Utp23	299900	ENSRNOG00000004387	0	1	0	0	0	0	0	1	0	1
MIMAT0000899	rno-miR-297	Uxs1	246232	ENSRNOG00000045605	0	1	0	0	0	0	0	1	0	1
MIMAT0000899	rno-miR-297	Vcsa1	24867	ENSRNOG00000001942	0	0	1	0	0	0	0	1	0	1
MIMAT0000899	rno-miR-297	Vom1r40	102551504	ENSRNOG00000050887	0	1	0	0	0	0	0	1	0	1
MIMAT0000899	rno-miR-297	Vom1r41	494261	ENSRNOG00000029852	0	1	0	0	0	0	0	1	0	1
MIMAT0000899	rno-miR-297	Vom1r49	102551504	ENSRNOG00000050887	0	1	0	0	0	0	0	1	0	1
MIMAT0000899	rno-miR-297	Vom2r4		ENSRNOG00000029249	0	2	0	0	0	0	0	1	0	1
MIMAT0000899	rno-miR-297	Vom2r58	100909453	ENSRNOG00000048482	0	1	0	0	0	0	0	1	0	1
MIMAT0000899	rno-miR-297	Vom2r65		ENSRNOG00000047177	0	1	0	0	0	0	0	1	0	1
MIMAT0000899	rno-miR-297	Vps13c			0	1	0	0	0	0	0	1	0	1
MIMAT0000899	rno-miR-297	Vps26			0	2	0	0	0	0	0	1	0	1
MIMAT0000899	rno-miR-297	Wdfy1	301549	ENSRNOG00000015080	0	0	1	0	0	0	0	1	0	1
MIMAT0000899	rno-miR-297	Wdr70	294783	ENSRNOG00000013336	0	1	0	0	0	0	0	1	0	1
MIMAT0000899	rno-miR-297	Wdr86	311956	ENSRNOG00000025735	0	1	0	0	0	0	0	1	0	1
MIMAT0000899	rno-miR-297	Wdr90	102555298	ENSRNOG00000020006	0	1	0	0	0	0	0	1	0	1
MIMAT0000899	rno-miR-297	Wrn	290805	ENSRNOG00000015440	0	0	0	1	0	0	0	1	0	1
MIMAT0000899	rno-miR-297	Wscd1	287466	ENSRNOG00000007869	0	2	0	0	0	0	0	1	0	1
MIMAT0000899	rno-miR-297	Xpa_predicted			0	1	0	0	0	0	0	1	0	1
MIMAT0000899	rno-miR-297	XR_008291.1			0	2	0	0	0	0	0	1	0	1
MIMAT0000899	rno-miR-297	Xrcc1	84495	ENSRNOG00000019915	0	1	0	0	0	0	0	1	0	1
MIMAT0000899	rno-miR-297	Yipf1	298312	ENSRNOG00000010512	0	1	0	0	0	0	0	1	0	1
MIMAT0000899	rno-miR-297	Zak	311743	ENSRNOG00000001515	0	1	0	0	0	0	0	1	0	1
MIMAT0000899	rno-miR-297	Zcchc12	313436	ENSRNOG00000013162	0	1	0	0	0	0	0	1	0	1
MIMAT0000899	rno-miR-297	Zfp1	498952	ENSRNOG00000019059	0	1	0	0	0	0	0	1	0	1
MIMAT0000899	rno-miR-297	Zfp354c	78972	ENSRNOG00000029205	0	1	0	0	0	0	0	1	0	1
MIMAT0000899	rno-miR-297	Zfp719	102556967	ENSRNOG00000033729	0	1	0	0	0	0	0	1	0	1
MIMAT0000899	rno-miR-297	Zfp951		ENSRNOG00000043048	0	1	0	0	0	0	0	1	0	1
MIMAT0000899	rno-miR-297	Zfr2	314639	ENSRNOG00000020416	0	1	0	0	0	0	0	1	0	1
MIMAT0000899	rno-miR-297	Zic1	64618	ENSRNOG00000014644	0	1	0	0	0	0	0	1	0	1
MIMAT0000899	rno-miR-297	Zmat4	684961	ENSRNOG00000042690	0	1	0	0	0	0	0	1	0	1
MIMAT0000899	rno-miR-297	Znhit3	497975	ENSRNOG00000027818	0	1	0	0	0	0	0	1	0	1
MIMAT0000899	rno-miR-297	Znrd1as1	499401	ENSRNOG00000000778	0	2	0	0	0	0	0	1	0	1
MIMAT0000899	rno-miR-297	Zswim5	313524	ENSRNOG00000018160	0	1	0	0	0	0	0	1	0	1
MIMAT0001538	rno-miR-429	9930021J17Rik			0	1	0	0	0	0	0	1	0	1
MIMAT0001538	rno-miR-429	Actr1a	294010	ENSRNOG00000019725	1	0	0	0	0	0	0	1	0	1
MIMAT0001538	rno-miR-429	Actr3	362298	ENSRNOG00000003206	1	0	0	0	0	0	0	1	0	1
MIMAT0001538	rno-miR-429	Acyp1	299203	ENSRNOG00000006744	1	0	0	0	0	0	0	1	0	1
MIMAT0001538	rno-miR-429	Adamts9	312566	ENSRNOG00000023257	1	0	0	0	0	0	0	1	0	1
MIMAT0001538	rno-miR-429	Adcy2	81636	ENSRNOG00000032150	1	0	0	0	0	0	0	1	0	1
MIMAT0001538	rno-miR-429	Adcyap1	24166	ENSRNOG00000049882	0	0	1	0	0	0	0	1	0	1
MIMAT0001538	rno-miR-429	Add3	25230	ENSRNOG00000012820	1	0	0	0	0	0	0	1	0	1
MIMAT0001538	rno-miR-429	Adk	25368	ENSRNOG00000012325	0	0	1	0	0	0	0	1	0	1
MIMAT0001538	rno-miR-429	Akap7	361458	ENSRNOG00000013202	0	0	1	0	0	0	0	1	0	1
MIMAT0001538	rno-miR-429	Alcam	79559	ENSRNOG00000001989	1	0	0	0	0	0	0	1	0	1
MIMAT0001538	rno-miR-429	Ambra1	59319	ENSRNOG00000017422	1	0	0	0	0	0	0	1	0	1
MIMAT0001538	rno-miR-429	Ammecr1l	307526	ENSRNOG00000016250	1	0	0	0	0	0	0	1	0	1
MIMAT0001538	rno-miR-429	Amotl2	65157	ENSRNOG00000008487	1	0	0	0	0	0	0	1	0	1
MIMAT0001538	rno-miR-429	Angel2	305035	ENSRNOG00000003795	1	0	0	0	0	0	0	1	0	1
MIMAT0001538	rno-miR-429	Angpt1	89807	ENSRNOG00000005854	0	1	0	0	0	0	0	1	0	1
MIMAT0001538	rno-miR-429	Ank1	306570	ENSRNOG00000018241	1	0	0	0	0	0	0	1	0	1
MIMAT0001538	rno-miR-429	Ankrd12	100910483	ENSRNOG00000012733	1	0	0	0	0	0	0	1	0	1
MIMAT0001538	rno-miR-429	Ankrd28	306264	ENSRNOG00000019697	1	0	0	0	0	0	0	1	0	1
MIMAT0001538	rno-miR-429	Ankrd39	367251	ENSRNOG00000023995	1	0	0	0	0	0	0	1	0	1
MIMAT0001538	rno-miR-429	Ankrd40	690586	ENSRNOG00000002935	1	0	0	0	0	0	0	1	0	1
MIMAT0001538	rno-miR-429	Ankrd44	301415	ENSRNOG00000021384	0	0	0	1	0	0	0	1	0	1
MIMAT0001538	rno-miR-429	Anlnl1	307056	ENSRNOG00000018113	0	1	0	0	0	0	0	1	0	1
MIMAT0001538	rno-miR-429	Ap3s1	302290	ENSRNOG00000003829	1	0	0	0	0	0	0	1	0	1
MIMAT0001538	rno-miR-429	Apbb2	305338	ENSRNOG00000025509	0	1	0	0	0	0	0	1	0	1
MIMAT0001538	rno-miR-429	Apoo	363474	ENSRNOG00000046918	2	0	0	0	0	0	0	1	0	1
MIMAT0001538	rno-miR-429	Arcn1	300674	ENSRNOG00000061108	1	0	0	0	0	0	0	1	0	1
MIMAT0001538	rno-miR-429	Arhgdia	360678	ENSRNOG00000036688	1	0	0	0	0	0	0	1	0	1
MIMAT0001538	rno-miR-429	Arhgef1	60323	ENSRNOG00000020130	1	0	0	0	0	0	0	1	0	1
MIMAT0001538	rno-miR-429	Arhgef15	287418	ENSRNOG00000004566	1	0	0	0	0	0	0	1	0	1
MIMAT0001538	rno-miR-429	Arih2	316005	ENSRNOG00000031827	2	0	0	0	0	0	0	1	0	1
MIMAT0001538	rno-miR-429	Arl2bp	498910	ENSRNOG00000016991	1	0	0	0	0	0	0	1	0	1
MIMAT0001538	rno-miR-429	Arl8b	500282	ENSRNOG00000055860	1	0	0	0	0	0	0	1	0	1
MIMAT0001538	rno-miR-429	Arpc5	360854	ENSRNOG00000028062	0	0	1	0	0	0	0	1	0	1
MIMAT0001538	rno-miR-429	Arpp21	363153	ENSRNOG00000008919	1	0	0	0	0	0	0	1	0	1
MIMAT0001538	rno-miR-429	Asf1a	294408	ENSRNOG00000000415	1	0	0	0	0	0	0	1	0	1
MIMAT0001538	rno-miR-429	Asip	24152	ENSRNOG00000017701	0	1	0	0	0	0	0	1	0	1
MIMAT0001538	rno-miR-429	Atf2	81647	ENSRNOG00000001597	0	1	0	0	0	0	0	1	0	1
MIMAT0001538	rno-miR-429	Atp11a	306600	ENSRNOG00000017154	1	0	0	0	0	0	0	1	0	1
MIMAT0001538	rno-miR-429	Atp11b		ENSRNOG00000012421	0	1	0	0	0	0	0	1	0	1
MIMAT0001538	rno-miR-429	Atp11c	317599	ENSRNOG00000003472	0	0	0	2	0	0	0	1	0	1
MIMAT0001538	rno-miR-429	Atp5l	300677	ENSRNOG00000028884	0	1	0	0	0	0	0	1	0	1
MIMAT0001538	rno-miR-429	B3gnt1	100911750	ENSRNOG00000020110	1	0	0	0	0	0	0	1	0	1
MIMAT0001538	rno-miR-429	B3gnt2	305571	ENSRNOG00000009267	1	0	0	0	0	0	0	1	0	1
MIMAT0001538	rno-miR-429	Bap1	306257	ENSRNOG00000019097	2	0	0	0	0	0	0	1	0	1
MIMAT0001538	rno-miR-429	Bat3			0	1	0	0	0	0	0	1	0	1
MIMAT0001538	rno-miR-429	Bbs5	362142	ENSRNOG00000007127	1	0	0	0	0	0	0	1	0	1
MIMAT0001538	rno-miR-429	BC049702			0	1	0	0	0	0	0	1	0	1
MIMAT0001538	rno-miR-429	Bhlhe22	365748	ENSRNOG00000021745	1	0	0	0	0	0	0	1	0	1
MIMAT0001538	rno-miR-429	Bnip3l	140923	ENSRNOG00000009820	1	0	0	0	0	0	0	1	0	1
MIMAT0001538	rno-miR-429	Brms1l	100910898	ENSRNOG00000008249	1	0	0	0	0	0	0	1	0	1
MIMAT0001538	rno-miR-429	Btbd14a			0	1	0	0	0	0	0	1	0	1
MIMAT0001538	rno-miR-429	C1galt1c1	302499	ENSRNOG00000002536	0	1	0	0	0	0	0	1	0	1
MIMAT0001538	rno-miR-429	Cab39	301574	ENSRNOG00000017297	1	0	0	0	0	0	0	1	0	1
MIMAT0001538	rno-miR-429	Cacnb2	116600	ENSRNOG00000018378	1	0	0	0	0	0	0	1	0	1
MIMAT0001538	rno-miR-429	Calu	64366	ENSRNOG00000006197	1	0	0	0	0	0	0	1	0	1
MIMAT0001538	rno-miR-429	Camsap2	289400	ENSRNOG00000008741	2	0	0	0	0	0	0	1	0	1
MIMAT0001538	rno-miR-429	Capon			0	1	0	0	0	0	0	1	0	1
MIMAT0001538	rno-miR-429	Capza3	29324	ENSRNOG00000008727	0	1	0	0	0	0	0	1	0	1
MIMAT0001538	rno-miR-429	Casc5	311327	ENSRNOG00000060100	1	0	0	0	0	0	0	1	0	1
MIMAT0001538	rno-miR-429	Caskin1	140722	ENSRNOG00000003195	1	0	0	0	0	0	0	1	0	1
MIMAT0001538	rno-miR-429	Casp2	64314	ENSRNOG00000016707	0	1	0	0	0	0	0	1	0	1
MIMAT0001538	rno-miR-429	Ccdc117	498404	ENSRNOG00000010706	1	0	0	0	0	0	0	1	0	1
MIMAT0001538	rno-miR-429	Ccdc53	299707	ENSRNOG00000005102	0	1	0	0	0	0	0	1	0	1
MIMAT0001538	rno-miR-429	Ccdc82	300359	ENSRNOG00000005713	1	0	0	0	0	0	0	1	0	1
MIMAT0001538	rno-miR-429	Ccdc88a	305605	ENSRNOG00000004057	1	0	0	0	0	0	0	1	0	1
MIMAT0001538	rno-miR-429	Ccng2	29157	ENSRNOG00000002089	1	0	0	0	0	0	0	1	0	1
MIMAT0001538	rno-miR-429	Ccnj	100909771	ENSRNOG00000014551	1	0	0	0	0	0	0	1	0	1
MIMAT0001538	rno-miR-429	Ccny	361261	ENSRNOG00000018123	1	0	0	0	0	0	0	1	0	1
MIMAT0001538	rno-miR-429	Ccnyl1	316452	ENSRNOG00000023807	0	0	0	1	0	0	0	1	0	1
MIMAT0001538	rno-miR-429	Cd6	25752	ENSRNOG00000020884	0	2	0	0	0	0	0	1	0	1
MIMAT0001538	rno-miR-429	Cdc40	361859	ENSRNOG00000000581	1	0	0	0	0	0	0	1	0	1
MIMAT0001538	rno-miR-429	Cdh13	192248	ENSRNOG00000014371	1	0	0	0	0	0	0	1	0	1
MIMAT0001538	rno-miR-429	Cdhr1	93662	ENSRNOG00000013330	1	0	0	0	0	0	0	1	0	1
MIMAT0001538	rno-miR-429	Cdk14	362316	ENSRNOG00000007151	1	0	0	0	0	0	0	1	0	1
MIMAT0001538	rno-miR-429	Cdk16	81741	ENSRNOG00000008578	1	0	0	0	0	0	0	1	0	1
MIMAT0001538	rno-miR-429	Cdr2	308958	ENSRNOG00000017260	1	0	0	0	0	0	0	1	0	1
MIMAT0001538	rno-miR-429	Cggbp1	288353	ENSRNOG00000000718	1	0	0	0	0	0	0	1	0	1
MIMAT0001538	rno-miR-429	Cish	83681	ENSRNOG00000029543	1	0	0	0	0	0	0	1	0	1
MIMAT0001538	rno-miR-429	Cks2	498709	ENSRNOG00000014130	0	1	0	0	0	0	0	1	0	1
MIMAT0001538	rno-miR-429	Cldn1	65129	ENSRNOG00000001926	1	0	0	0	0	0	0	1	0	1
MIMAT0001538	rno-miR-429	Clec2d	113937		0	0	1	0	0	0	0	1	0	1
MIMAT0001538	rno-miR-429	Clip2	29264	ENSRNOG00000021611	1	0	0	0	0	0	0	1	0	1
MIMAT0001538	rno-miR-429	Clk4	287269	ENSRNOG00000003714	0	1	0	0	0	0	0	1	0	1
MIMAT0001538	rno-miR-429	Cnot4	312227	ENSRNOG00000010795	1	0	0	0	0	0	0	1	0	1
MIMAT0001538	rno-miR-429	Cnot8	363603	ENSRNOG00000002630	1	0	0	0	0	0	0	1	0	1
MIMAT0001538	rno-miR-429	Cnot9	301513	ENSRNOG00000016034	0	0	0	1	0	0	0	1	0	1
MIMAT0001538	rno-miR-429	Coa4	499214	ENSRNOG00000025385	1	0	0	0	0	0	0	1	0	1
MIMAT0001538	rno-miR-429	Cog7	293456	ENSRNOG00000060008	0	1	0	0	0	0	0	1	0	1
MIMAT0001538	rno-miR-429	Col4a3bp	365652	ENSRNOG00000015686	1	0	0	0	0	0	0	1	0	1
MIMAT0001538	rno-miR-429	Coro1c	501841	ENSRNOG00000000697	1	0	0	0	0	0	0	1	0	1
MIMAT0001538	rno-miR-429	Creb5	500131	ENSRNOG00000008622	1	0	0	0	0	0	0	1	0	1
MIMAT0001538	rno-miR-429	Crebbp	54244	ENSRNOG00000005330	1	0	0	0	0	0	0	1	0	1
MIMAT0001538	rno-miR-429	Crip2	338401	ENSRNOG00000005041	1	0	0	0	0	0	0	1	0	1
MIMAT0001538	rno-miR-429	Csmd3	314942	ENSRNOG00000004937	1	0	0	0	0	0	0	1	0	1
MIMAT0001538	rno-miR-429	Csnk1g3	64823	ENSRNOG00000016677	1	0	0	0	0	0	0	1	0	1
MIMAT0001538	rno-miR-429	Ctag2	501655	ENSRNOG00000012560	0	1	0	0	0	0	0	1	0	1
MIMAT0001538	rno-miR-429	Ctnnal1	298019	ENSRNOG00000010593	1	0	0	0	0	0	0	1	0	1
MIMAT0001538	rno-miR-429	Cyp7b1	25429	ENSRNOG00000009730	1	0	0	0	0	0	0	1	0	1
MIMAT0001538	rno-miR-429	Cyth3	116693	ENSRNOG00000001065	1	0	0	0	0	0	0	1	0	1
MIMAT0001538	rno-miR-429	Dcaf5	314273	ENSRNOG00000004556	1	0	0	0	0	0	0	1	0	1
MIMAT0001538	rno-miR-429	Dcp2		ENSRNOG00000045593	0	1	0	0	0	0	0	1	0	1
MIMAT0001538	rno-miR-429	Ddr2	685781	ENSRNOG00000002881	0	1	0	0	0	0	0	1	0	1
MIMAT0001538	rno-miR-429	Ddx5	287765	ENSRNOG00000030680	0	0	1	0	0	0	0	1	0	1
MIMAT0001538	rno-miR-429	Deadc1			0	2	0	0	0	0	0	1	0	1
MIMAT0001538	rno-miR-429	Dennd2c	295333	ENSRNOG00000018716	1	0	0	0	0	0	0	1	0	1
MIMAT0001538	rno-miR-429	Depdc1b	310074	ENSRNOG00000010701	1	0	0	0	0	0	0	1	0	1
MIMAT0001538	rno-miR-429	Desi1	315160	ENSRNOG00000005577	1	0	0	0	0	0	0	1	0	1
MIMAT0001538	rno-miR-429	Dgka	140866	ENSRNOG00000022943	0	1	0	0	0	0	0	1	0	1
MIMAT0001538	rno-miR-429	Dhx36	310461	ENSRNOG00000014599	1	0	0	0	0	0	0	1	0	1
MIMAT0001538	rno-miR-429	Dlgap1	65040	ENSRNOG00000016196	0	0	1	0	0	0	0	1	0	1
MIMAT0001538	rno-miR-429	Dmp1	25312	ENSRNOG00000002167	0	0	1	0	0	0	0	1	0	1
MIMAT0001538	rno-miR-429	Dnajb12	294513	ENSRNOG00000030408	1	0	0	0	0	0	0	1	0	1
MIMAT0001538	rno-miR-429	Dnmt3a	444984	ENSRNOG00000026649	1	0	0	0	0	0	0	1	0	1
MIMAT0001538	rno-miR-429	Dock9	259237	ENSRNOG00000011969	1	0	0	0	0	0	0	1	0	1
MIMAT0001538	rno-miR-429	Dot1l	362831	ENSRNOG00000032546	1	0	0	0	0	0	0	1	0	1
MIMAT0001538	rno-miR-429	Dph2	298452	ENSRNOG00000019735	0	1	0	0	0	0	0	1	0	1
MIMAT0001538	rno-miR-429	Dpysl2	25416	ENSRNOG00000009625	1	0	0	0	0	0	0	1	0	1
MIMAT0001538	rno-miR-429	Dspp	25254	ENSRNOG00000002168	0	0	2	0	0	0	0	1	0	1
MIMAT0001538	rno-miR-429	Dyrk2	314862	ENSRNOG00000007821	1	0	0	0	0	0	0	1	0	1
MIMAT0001538	rno-miR-429	E2f6	313978	ENSRNOG00000004449	1	0	0	0	0	0	0	1	0	1
MIMAT0001538	rno-miR-429	Eapp	299043	ENSRNOG00000004509	0	1	0	0	0	0	0	1	0	1
MIMAT0001538	rno-miR-429	Ednra	24326	ENSRNOG00000012721	1	0	0	0	0	0	0	1	0	1
MIMAT0001538	rno-miR-429	Egln1	308913	ENSRNOG00000019773	1	0	0	0	0	0	0	1	0	1
MIMAT0001538	rno-miR-429	Ehbp1l1	309169	ENSRNOG00000056038	0	1	0	0	0	0	0	1	0	1
MIMAT0001538	rno-miR-429	Eif2b5	192234	ENSRNOG00000038160	1	0	0	0	0	0	0	1	0	1
MIMAT0001538	rno-miR-429	Eif4e	117045	ENSRNOG00000052343	1	0	0	0	0	0	0	1	0	1
MIMAT0001538	rno-miR-429	Eif5a2	310261	ENSRNOG00000011859	1	0	0	0	0	0	0	1	0	1
MIMAT0001538	rno-miR-429	Eif5b-ps1	308306	ENSRNOG00000023356	1	0	0	0	0	0	0	1	0	1
MIMAT0001538	rno-miR-429	Eif5b	308306	ENSRNOG00000023356	1	0	0	0	0	0	0	1	0	1
MIMAT0001538	rno-miR-429	Elac1	307604	ENSRNOG00000000113	0	1	0	0	0	0	0	1	0	1
MIMAT0001538	rno-miR-429	Elavl2		ENSRNOG00000006853	1	0	0	0	0	0	0	1	0	1
MIMAT0001538	rno-miR-429	Elmod1	315670	ENSRNOG00000009054	2	0	0	0	0	0	0	1	0	1
MIMAT0001538	rno-miR-429	Endod1	363015	ENSRNOG00000024757	1	0	0	0	0	0	0	1	0	1
MIMAT0001538	rno-miR-429	Epm2aip1	316021	ENSRNOG00000043006	0	0	0	1	0	0	0	1	0	1
MIMAT0001538	rno-miR-429	Eps8l2	361674	ENSRNOG00000018336	1	0	0	0	0	0	0	1	0	1
MIMAT0001538	rno-miR-429	Erg	170909	ENSRNOG00000001652	1	0	0	0	0	0	0	1	0	1
MIMAT0001538	rno-miR-429	Eri3	313535	ENSRNOG00000019381	1	0	0	0	0	0	0	1	0	1
MIMAT0001538	rno-miR-429	Esrrg	360896	ENSRNOG00000002593	1	0	0	0	0	0	0	1	0	1
MIMAT0001538	rno-miR-429	Ets2	304063	ENSRNOG00000001647	1	0	0	0	0	0	0	1	0	1
MIMAT0001538	rno-miR-429	Exoc6b	500233	ENSRNOG00000059615	1	0	0	0	0	0	0	1	0	1
MIMAT0001538	rno-miR-429	Extl2	310803	ENSRNOG00000014323	0	1	0	0	0	0	0	1	0	1
MIMAT0001538	rno-miR-429	F2r	25439	ENSRNOG00000048043	0	1	0	0	0	0	0	1	0	1
MIMAT0001538	rno-miR-429	Fam107b	498796	ENSRNOG00000014886	2	0	0	0	0	0	0	1	0	1
MIMAT0001538	rno-miR-429	Fam117b	363236	ENSRNOG00000022066	1	0	0	0	0	0	0	1	0	1
MIMAT0001538	rno-miR-429	FAM120C	317423	ENSRNOG00000002654	1	0	0	0	0	0	0	1	0	1
MIMAT0001538	rno-miR-429	Fam134b	619558	ENSRNOG00000010589	1	0	0	0	0	0	0	1	0	1
MIMAT0001538	rno-miR-429	Fam149a	361153	ENSRNOG00000021693	1	0	0	0	0	0	0	1	0	1
MIMAT0001538	rno-miR-429	Fam169a	310013	ENSRNOG00000016505	1	0	0	0	0	0	0	1	0	1
MIMAT0001538	rno-miR-429	Fam178a	499360	ENSRNOG00000014482	1	0	0	0	0	0	0	1	0	1
MIMAT0001538	rno-miR-429	Fam179b	314169	ENSRNOG00000004415	1	0	0	0	0	0	0	1	0	1
MIMAT0001538	rno-miR-429	Fam209a	296411	ENSRNOG00000005235	0	1	0	0	0	0	0	1	0	1
MIMAT0001538	rno-miR-429	Fam76b	367021	ENSRNOG00000024863	1	0	0	0	0	0	0	1	0	1
MIMAT0001538	rno-miR-429	Fbxo34	305830	ENSRNOG00000011704	0	1	0	0	0	0	0	1	0	1
MIMAT0001538	rno-miR-429	Fbxw11	303024	ENSRNOG00000004395	2	0	0	0	0	0	0	1	0	1
MIMAT0001538	rno-miR-429	Fbxw7	100360914	ENSRNOG00000010889	0	0	0	1	0	0	0	1	0	1
MIMAT0001538	rno-miR-429	Fchsd2	308864	ENSRNOG00000019319	1	0	0	0	0	0	0	1	0	1
MIMAT0001538	rno-miR-429	Fez2	94269	ENSRNOG00000004577	0	0	1	0	0	0	0	1	0	1
MIMAT0001538	rno-miR-429	Fgd1	102555067	ENSRNOG00000038970	1	0	0	0	0	0	0	1	0	1
MIMAT0001538	rno-miR-429	Fign	295649	ENSRNOG00000004679	1	0	0	0	0	0	0	1	0	1
MIMAT0001538	rno-miR-429	Folh1	85309	ENSRNOG00000013770	0	1	0	0	0	0	0	1	0	1
MIMAT0001538	rno-miR-429	Foxk2	303753	ENSRNOG00000036663	1	0	0	0	0	0	0	1	0	1
MIMAT0001538	rno-miR-429	Foxo3	294515	ENSRNOG00000000299	1	0	0	0	0	0	0	1	0	1
MIMAT0001538	rno-miR-429	Frs2	314850	ENSRNOG00000005642	1	0	0	0	0	0	0	1	0	1
MIMAT0001538	rno-miR-429	Fundc1	363442	ENSRNOG00000003470	0	0	1	0	0	0	0	1	0	1
MIMAT0001538	rno-miR-429	Fxr2	287433	ENSRNOG00000011876	1	0	0	0	0	0	0	1	0	1
MIMAT0001538	rno-miR-429	Gabarapl2	100359937	ENSRNOG00000019425	1	0	0	0	0	0	0	1	0	1
MIMAT0001538	rno-miR-429	Gabpa	363735	ENSRNOG00000053205	2	0	0	0	0	0	0	1	0	1
MIMAT0001538	rno-miR-429	Gata2	25159	ENSRNOG00000012347	1	0	0	0	0	0	0	1	0	1
MIMAT0001538	rno-miR-429	Gatsl2	304410	ENSRNOG00000001484	1	0	0	0	0	0	0	1	0	1
MIMAT0001538	rno-miR-429	Gdi2	29662	ENSRNOG00000018091	2	0	0	0	0	0	0	1	0	1
MIMAT0001538	rno-miR-429	Gem	297902	ENSRNOG00000015160	1	0	0	0	0	0	0	1	0	1
MIMAT0001538	rno-miR-429	Get4	288518	ENSRNOG00000001293	1	0	0	0	0	0	0	1	0	1
MIMAT0001538	rno-miR-429	Gfi1	24388	ENSRNOG00000002042	1	0	0	0	0	0	0	1	0	1
MIMAT0001538	rno-miR-429	Glg1	29476	ENSRNOG00000018668	1	0	0	0	0	0	0	1	0	1
MIMAT0001538	rno-miR-429	Gls	24398	ENSRNOG00000056246	3	0	0	0	0	0	0	1	0	1
MIMAT0001538	rno-miR-429	Gm2a	282838	ENSRNOG00000052219	0	0	1	0	0	0	0	1	0	1
MIMAT0001538	rno-miR-429	Gmfb	81661	ENSRNOG00000047250	1	0	0	0	0	0	0	1	0	1
MIMAT0001538	rno-miR-429	Gnai3	25643	ENSRNOG00000019465	1	0	0	0	0	0	0	1	0	1
MIMAT0001538	rno-miR-429	Gne	114711	ENSRNOG00000014365	0	2	0	0	0	0	0	1	0	1
MIMAT0001538	rno-miR-429	Gosr2	64154	ENSRNOG00000003506	1	0	0	0	0	0	0	1	0	1
MIMAT0001538	rno-miR-429	Gp49b			0	1	0	0	0	0	0	1	0	1
MIMAT0001538	rno-miR-429	Gpnmb	113955	ENSRNOG00000008816	0	1	0	0	0	0	0	1	0	1
MIMAT0001538	rno-miR-429	Gpr146	498153	ENSRNOG00000001288	1	0	0	0	0	0	0	1	0	1
MIMAT0001538	rno-miR-429	Gpr45	301372	ENSRNOG00000016446	1	0	0	0	0	0	0	1	0	1
MIMAT0001538	rno-miR-429	Grem2	289264	ENSRNOG00000003616	1	0	0	0	0	0	0	1	0	1
MIMAT0001538	rno-miR-429	Gtf2e1	303918	ENSRNOG00000026008	1	0	0	0	0	0	0	1	0	1
MIMAT0001538	rno-miR-429	Gulp1	314543	ENSRNOG00000003242	0	0	1	0	0	0	0	1	0	1
MIMAT0001538	rno-miR-429	Haus5	100362495	ENSRNOG00000024266	0	1	0	0	0	0	0	1	0	1
MIMAT0001538	rno-miR-429	Hdhd2	361351	ENSRNOG00000043171	0	0	1	0	0	0	0	1	0	1
MIMAT0001538	rno-miR-429	Hipk1	365895	ENSRNOG00000019333	0	0	0	1	0	0	0	1	0	1
MIMAT0001538	rno-miR-429	Hmbox1	305968	ENSRNOG00000013326	1	0	0	0	0	0	0	1	0	1
MIMAT0001538	rno-miR-429	Hnf1b	25640	ENSRNOG00000002598	1	0	0	0	0	0	0	1	0	1
MIMAT0001538	rno-miR-429	Hnrnpu	117280	ENSRNOG00000033790	1	0	0	0	0	0	0	1	0	1
MIMAT0001538	rno-miR-429	Hook1	313370	ENSRNOG00000026226	1	0	0	0	0	0	0	1	0	1
MIMAT0001538	rno-miR-429	Hs2st1	292155	ENSRNOG00000012549	1	0	0	0	0	0	0	1	0	1
MIMAT0001538	rno-miR-429	Hspa9	291671	ENSRNOG00000019525	0	0	0	1	0	0	0	1	0	1
MIMAT0001538	rno-miR-429	Hsph1	288444	ENSRNOG00000000902	1	0	0	0	0	0	0	1	0	1
MIMAT0001538	rno-miR-429	Htr2c	25187	ENSRNOG00000030877	0	1	0	0	0	0	0	1	0	1
MIMAT0001538	rno-miR-429	Hyou1	192235	ENSRNOG00000010944	1	0	0	0	0	0	0	1	0	1
MIMAT0001538	rno-miR-429	Ier5	498256	ENSRNOG00000050671	1	0	0	0	0	0	0	1	0	1
MIMAT0001538	rno-miR-429	Ifna4	298205	ENSRNOG00000033823	0	1	0	0	0	0	0	1	0	1
MIMAT0001538	rno-miR-429	Igsf3	295325	ENSRNOG00000023851	1	0	0	0	0	0	0	1	0	1
MIMAT0001538	rno-miR-429	Impad1	100910881	ENSRNOG00000046647	1	0	0	0	0	0	0	1	0	1
MIMAT0001538	rno-miR-429	Insig1	64194	ENSRNOG00000006859	1	0	0	0	0	0	0	1	0	1
MIMAT0001538	rno-miR-429	Ints2	360589	ENSRNOG00000003576	0	1	0	0	0	0	0	1	0	1
MIMAT0001538	rno-miR-429	Ints8		ENSRNOG00000008124	0	1	0	0	0	0	0	1	0	1
MIMAT0001538	rno-miR-429	Irs1	25467	ENSRNOG00000014597	1	0	0	0	0	0	0	1	0	1
MIMAT0001538	rno-miR-429	Jakmip3	365380	ENSRNOG00000027590	1	0	0	0	0	0	0	1	0	1
MIMAT0001538	rno-miR-429	Kank1	309429	ENSRNOG00000016023	1	0	0	0	0	0	0	1	0	1
MIMAT0001538	rno-miR-429	Kat2b	301164	ENSRNOG00000011871	0	0	1	0	0	0	0	1	0	1
MIMAT0001538	rno-miR-429	Kcna2	25468	ENSRNOG00000018285	0	2	0	0	0	0	0	1	0	1
MIMAT0001538	rno-miR-429	Kcnb1	25736	ENSRNOG00000046949	1	0	0	0	0	0	0	1	0	1
MIMAT0001538	rno-miR-429	Kcnk2	170899	ENSRNOG00000002653	1	0	0	0	0	0	0	1	0	1
MIMAT0001538	rno-miR-429	Kcnmb4	66016	ENSRNOG00000054458	0	1	0	0	0	0	0	1	0	1
MIMAT0001538	rno-miR-429	Kcnq3	29682	ENSRNOG00000005206	1	0	0	0	0	0	0	1	0	1
MIMAT0001538	rno-miR-429	Kcnq4	298496	ENSRNOG00000010576	0	1	0	0	0	0	0	1	0	1
MIMAT0001538	rno-miR-429	Kctd8	364148	ENSRNOG00000026472	1	0	0	0	0	0	0	1	0	1
MIMAT0001538	rno-miR-429	Kdm4a	313539	ENSRNOG00000019956	1	0	0	0	0	0	0	1	0	1
MIMAT0001538	rno-miR-429	Kif13a	308173	ENSRNOG00000001455	1	0	0	0	0	0	0	1	0	1
MIMAT0001538	rno-miR-429	Klf10	81813	ENSRNOG00000006118	1	0	0	0	0	0	0	1	0	1
MIMAT0001538	rno-miR-429	Klhl29	298867	ENSRNOG00000005371	1	0	0	0	0	0	0	1	0	1
MIMAT0001538	rno-miR-429	Klhl38	314996	ENSRNOG00000007896	0	0	1	0	0	0	0	1	0	1
MIMAT0001538	rno-miR-429	Klra7	494206	ENSRNOG00000033699	0	1	0	0	0	0	0	1	0	1
MIMAT0001538	rno-miR-429	Lamc1	117036	ENSRNOG00000002680	1	0	0	0	0	0	0	1	0	1
MIMAT0001538	rno-miR-429	Lcorl	498385	ENSRNOG00000003787	2	0	0	0	0	0	0	1	0	1
MIMAT0001538	rno-miR-429	Lcp1	306071	ENSRNOG00000010319	1	0	0	0	0	0	0	1	0	1
MIMAT0001538	rno-miR-429	Lfng	170905	ENSRNOG00000001250	1	0	0	0	0	0	0	1	0	1
MIMAT0001538	rno-miR-429	Lgalsl	360983	ENSRNOG00000005464	1	0	0	0	0	0	0	1	0	1
MIMAT0001538	rno-miR-429	Lmtk2	304286	ENSRNOG00000025155	1	0	0	0	0	0	0	1	0	1
MIMAT0001538	rno-miR-429	LOC100174910	100174910	ENSRNOG00000013738	1	0	0	0	0	0	0	1	0	1
MIMAT0001538	rno-miR-429	LOC100359916	117282	ENSRNOG00000019113	0	0	1	0	0	0	0	1	0	1
MIMAT0001538	rno-miR-429	LOC100359937	100359937	ENSRNOG00000032756	1	0	0	0	0	0	0	1	0	1
MIMAT0001538	rno-miR-429	LOC100362344	100362344	ENSRNOG00000036910	1	0	0	0	0	0	0	1	0	1
MIMAT0001538	rno-miR-429	LOC100362518		ENSRNOG00000002286	0	1	0	0	0	0	0	1	0	1
MIMAT0001538	rno-miR-429	LOC100362620	498709	ENSRNOG00000014130	0	1	0	0	0	0	0	1	0	1
MIMAT0001538	rno-miR-429	LOC100363335	117282	ENSRNOG00000019113	0	0	1	0	0	0	0	1	0	1
MIMAT0001538	rno-miR-429	LOC100363472	100363472	ENSRNOG00000000641	1	0	0	0	0	0	0	1	0	1
MIMAT0001538	rno-miR-429	LOC100364003		ENSRNOG00000046056	0	1	0	0	0	0	0	1	0	1
MIMAT0001538	rno-miR-429	LOC100364116	100364116	ENSRNOG00000030426	0	1	0	0	0	0	0	1	0	1
MIMAT0001538	rno-miR-429	LOC100909655	100909655	ENSRNOG00000003160	1	0	0	0	0	0	0	1	0	1
MIMAT0001538	rno-miR-429	LOC100909771	100909771	ENSRNOG00000014551	1	0	0	0	0	0	0	1	0	1
MIMAT0001538	rno-miR-429	LOC100910164	688581	ENSRNOG00000028176	2	0	0	0	0	0	0	1	0	1
MIMAT0001538	rno-miR-429	LOC100910207	100910207	ENSRNOG00000000070	1	0	0	0	0	0	0	1	0	1
MIMAT0001538	rno-miR-429	LOC100910531	311415	ENSRNOG00000026277	1	0	0	0	0	0	0	1	0	1
MIMAT0001538	rno-miR-429	LOC100910572	100910572	ENSRNOG00000003313	1	0	0	0	0	0	0	1	0	1
MIMAT0001538	rno-miR-429	LOC100910679	494206	ENSRNOG00000033699	0	1	0	0	0	0	0	1	0	1
MIMAT0001538	rno-miR-429	LOC100910779	100910779	ENSRNOG00000017100	1	0	0	0	0	0	0	1	0	1
MIMAT0001538	rno-miR-429	LOC100910838	304376	ENSRNOG00000024641	1	0	0	0	0	0	0	1	0	1
MIMAT0001538	rno-miR-429	LOC100910881	100910881	ENSRNOG00000046647	1	0	0	0	0	0	0	1	0	1
MIMAT0001538	rno-miR-429	LOC100911256	100911256	ENSRNOG00000005540	1	0	0	0	0	0	0	1	0	1
MIMAT0001538	rno-miR-429	LOC100911750	100911750	ENSRNOG00000020110	1	0	0	0	0	0	0	1	0	1
MIMAT0001538	rno-miR-429	LOC100912369	305373	ENSRNOG00000011096	0	0	0	1	0	0	0	1	0	1
MIMAT0001538	rno-miR-429	LOC100912469	100912469	ENSRNOG00000046005	1	0	0	0	0	0	0	1	0	1
MIMAT0001538	rno-miR-429	LOC100912512	246217	ENSRNOG00000016653	1	0	0	0	0	0	0	1	0	1
MIMAT0001538	rno-miR-429	LOC100912698	312654	ENSRNOG00000011614	1	0	0	0	0	0	0	1	0	1
MIMAT0001538	rno-miR-429	LOC102546863	494206	ENSRNOG00000033699	0	1	0	0	0	0	0	1	0	1
MIMAT0001538	rno-miR-429	LOC361635	361635	ENSRNOG00000016063	0	1	0	0	0	0	0	1	0	1
MIMAT0001538	rno-miR-429	LOC367830		ENSRNOG00000042530	0	1	0	0	0	0	0	1	0	1
MIMAT0001538	rno-miR-429	LOC497796	494206	ENSRNOG00000033699	0	1	0	0	0	0	0	1	0	1
MIMAT0001538	rno-miR-429	LOC502907	494206	ENSRNOG00000033699	0	1	0	0	0	0	0	1	0	1
MIMAT0001538	rno-miR-429	LOC690045	494206	ENSRNOG00000061895	0	1	0	0	0	0	0	1	0	1
MIMAT0001538	rno-miR-429	LOC690097	494206	ENSRNOG00000033699	0	1	0	0	0	0	0	1	0	1
MIMAT0001538	rno-miR-429	LOC690251	303874	ENSRNOG00000048136	1	0	0	0	0	0	0	1	0	1
MIMAT0001538	rno-miR-429	Lphn2	171447	ENSRNOG00000032660	1	0	0	0	0	0	0	1	0	1
MIMAT0001538	rno-miR-429	Lppr4	295401	ENSRNOG00000016872	1	0	0	0	0	0	0	1	0	1
MIMAT0001538	rno-miR-429	Lrat	64047	ENSRNOG00000025608	1	0	0	0	0	0	0	1	0	1
MIMAT0001538	rno-miR-429	Lrp1	299858	ENSRNOG00000025053	1	0	0	0	0	0	0	1	0	1
MIMAT0001538	rno-miR-429	Lrp1b	311926	ENSRNOG00000030243	1	0	0	0	0	0	0	1	0	1
MIMAT0001538	rno-miR-429	Lrrtm2	685472	ENSRNOG00000047085	1	0	0	0	0	0	0	1	0	1
MIMAT0001538	rno-miR-429	Lrrtm3	294380	ENSRNOG00000026466	1	0	0	0	0	0	0	1	0	1
MIMAT0001538	rno-miR-429	Ly49si2	494206	ENSRNOG00000033699	0	1	0	0	0	0	0	1	0	1
MIMAT0001538	rno-miR-429	Ly49si3	494206	ENSRNOG00000033699	0	1	0	0	0	0	0	1	0	1
MIMAT0001538	rno-miR-429	Lypla1	25514	ENSRNOG00000008320	1	0	0	0	0	0	0	1	0	1
MIMAT0001538	rno-miR-429	Mad2l1bp	316237	ENSRNOG00000019463	0	1	0	0	0	0	0	1	0	1
MIMAT0001538	rno-miR-429	Map4k3	170920	ENSRNOG00000007172	2	0	0	0	0	0	0	1	0	1
MIMAT0001538	rno-miR-429	Map4k4	301363	ENSRNOG00000014013	1	0	0	0	0	0	0	1	0	1
MIMAT0001538	rno-miR-429	Map4k5	503027	ENSRNOG00000004923	1	0	0	0	0	0	0	1	0	1
MIMAT0001538	rno-miR-429	March6	294862	ENSRNOG00000011066	1	0	0	0	0	0	0	1	0	1
MIMAT0001538	rno-miR-429	March8	312656	ENSRNOG00000012297	1	0	0	0	0	0	0	1	0	1
MIMAT0001538	rno-miR-429	Marcks	25603	ENSRNOG00000000579	0	0	0	1	0	0	0	1	0	1
MIMAT0001538	rno-miR-429	Marcksl1	100911122	ENSRNOG00000009113	1	0	0	0	0	0	0	1	0	1
MIMAT0001538	rno-miR-429	Mdfic	362325	ENSRNOG00000053787	1	0	0	0	0	0	0	1	0	1
MIMAT0001538	rno-miR-429	Med13	303403	ENSRNOG00000003679	1	0	0	0	0	0	0	1	0	1
MIMAT0001538	rno-miR-429	Mex3b	308790	ENSRNOG00000025142	1	0	0	0	0	0	0	1	0	1
MIMAT0001538	rno-miR-429	Mief1	315141	ENSRNOG00000017553	0	1	0	0	0	0	0	1	0	1
MIMAT0001538	rno-miR-429	Mknk1	500526	ENSRNOG00000010381	1	0	0	0	0	0	0	1	0	1
MIMAT0001538	rno-miR-429	Mmd2	304301	ENSRNOG00000001113	1	0	0	0	0	0	0	1	0	1
MIMAT0001538	rno-miR-429	Mmgt2	303211		0	0	1	0	0	0	0	1	0	1
MIMAT0001538	rno-miR-429	Mob4	171050	ENSRNOG00000014980	1	0	0	0	0	0	0	1	0	1
MIMAT0001538	rno-miR-429	Mpdz	29365	ENSRNOG00000007894	1	0	0	0	0	0	0	1	0	1
MIMAT0001538	rno-miR-429	Mpp5	314259	ENSRNOG00000008788	1	0	0	0	0	0	0	1	0	1
MIMAT0001538	rno-miR-429	Mpped1	362971	ENSRNOG00000010834	1	0	0	0	0	0	0	1	0	1
MIMAT0001538	rno-miR-429	Ms4a12	293741	ENSRNOG00000026387	0	1	0	0	0	0	0	1	0	1
MIMAT0001538	rno-miR-429	Msl2	315959	ENSRNOG00000023021	1	0	0	0	0	0	0	1	0	1
MIMAT0001538	rno-miR-429	Mtmr11	689613	ENSRNOG00000021176	0	1	0	0	0	0	0	1	0	1
MIMAT0001538	rno-miR-429	Mtus1	306487	ENSRNOG00000010748	1	0	0	0	0	0	0	1	0	1
MIMAT0001538	rno-miR-429	Mxd4	360961	ENSRNOG00000015033	1	0	0	0	0	0	0	1	0	1
MIMAT0001538	rno-miR-429	Mybl1	297783	ENSRNOG00000021669	1	0	0	0	0	0	0	1	0	1
MIMAT0001538	rno-miR-429	Mycn	298894	ENSRNOG00000051372	1	0	0	0	0	0	0	1	0	1
MIMAT0001538	rno-miR-429	Mylk	288057	ENSRNOG00000002215	1	0	0	0	0	0	0	1	0	1
MIMAT0001538	rno-miR-429	Myt1	362291	ENSRNOG00000017346	2	0	0	0	0	0	0	1	0	1
MIMAT0001538	rno-miR-429	Nab1	64824	ENSRNOG00000012959	1	0	0	0	0	0	0	1	0	1
MIMAT0001538	rno-miR-429	Nap1l3	170914	ENSRNOG00000029087	0	0	1	0	0	0	0	1	0	1
MIMAT0001538	rno-miR-429	Nck2	316369	ENSRNOG00000017155	1	0	0	0	0	0	0	1	0	1
MIMAT0001538	rno-miR-429	Ncoa4	619385	ENSRNOG00000019768	1	0	0	0	0	0	0	1	0	1
MIMAT0001538	rno-miR-429	Ncs1	65153	ENSRNOG00000008761	1	0	0	0	0	0	0	1	0	1
MIMAT0001538	rno-miR-429	Ndfip2	361089	ENSRNOG00000024022	0	0	0	1	0	0	0	1	0	1
MIMAT0001538	rno-miR-429	Ndrg3	296318		0	0	1	0	0	0	0	1	0	1
MIMAT0001538	rno-miR-429	Nedd1	299730	ENSRNOG00000004011	1	0	0	0	0	0	0	1	0	1
MIMAT0001538	rno-miR-429	Nedd4l	291553	ENSRNOG00000017610	1	0	0	0	0	0	0	1	0	1
MIMAT0001538	rno-miR-429	NEWGENE_1310847	103690404	ENSRNOG00000058841	0	0	0	1	0	0	0	1	0	1
MIMAT0001538	rno-miR-429	Nfasc	116690	ENSRNOG00000030515	1	0	0	0	0	0	0	1	0	1
MIMAT0001538	rno-miR-429	Nfia	25492	ENSRNOG00000006966	1	0	0	0	0	0	0	1	0	1
MIMAT0001538	rno-miR-429	Ngef	246217	ENSRNOG00000016653	1	0	0	0	0	0	0	1	0	1
MIMAT0001538	rno-miR-429	Nin	100911256	ENSRNOG00000005540	1	0	0	0	0	0	0	1	0	1
MIMAT0001538	rno-miR-429	Nos2	24599	ENSRNOG00000049980	0	0	1	0	0	0	0	1	0	1
MIMAT0001538	rno-miR-429	Npc1	266732	ENSRNOG00000012016	1	0	0	0	0	0	0	1	0	1
MIMAT0001538	rno-miR-429	Npm1	25498	ENSRNOG00000004616	0	0	1	0	0	0	0	1	0	1
MIMAT0001538	rno-miR-429	Nr2c2	50659	ENSRNOG00000010536	1	0	0	0	0	0	0	1	0	1
MIMAT0001538	rno-miR-429	Nrbf2	100363472	ENSRNOG00000000641	1	0	0	0	0	0	0	1	0	1
MIMAT0001538	rno-miR-429	Nrip1	304157	ENSRNOG00000001585	1	0	0	0	0	0	0	1	0	1
MIMAT0001538	rno-miR-429	Nudt21	291877	ENSRNOG00000042983	0	1	0	0	0	0	0	1	0	1
MIMAT0001538	rno-miR-429	Nup35	295692	ENSRNOG00000009290	0	1	0	0	0	0	0	1	0	1
MIMAT0001538	rno-miR-429	Nxn_predicted			0	1	0	0	0	0	0	1	0	1
MIMAT0001538	rno-miR-429	Nxn	360577	ENSRNOG00000008178	0	1	0	0	0	0	0	1	0	1
MIMAT0001538	rno-miR-429	Nyap1	304376	ENSRNOG00000024641	1	0	0	0	0	0	0	1	0	1
MIMAT0001538	rno-miR-429	Oat	64313	ENSRNOG00000016807	0	0	1	0	0	0	0	1	0	1
MIMAT0001538	rno-miR-429	Ocln	83497	ENSRNOG00000018297	1	0	0	0	0	0	0	1	0	1
MIMAT0001538	rno-miR-429	Olig3	293012	ENSRNOG00000012057	1	0	0	0	0	0	0	1	0	1
MIMAT0001538	rno-miR-429	Olr1709	309578	ENSRNOG00000050354	0	1	0	0	0	0	0	1	0	1
MIMAT0001538	rno-miR-429	Olr1768	293878	ENSRNOG00000037236	0	1	0	0	0	0	0	1	0	1
MIMAT0001538	rno-miR-429	Olr784_predicted			0	1	0	0	0	0	0	1	0	1
MIMAT0001538	rno-miR-429	Olr851	298040	ENSRNOG00000029023	0	1	0	0	0	0	0	1	0	1
MIMAT0001538	rno-miR-429	Omg	450224	ENSRNOG00000014107	0	0	1	0	0	0	0	1	0	1
MIMAT0001538	rno-miR-429	Osgepl1	314548	ENSRNOG00000004001	0	0	1	0	0	0	0	1	0	1
MIMAT0001538	rno-miR-429	Osr1	298878	ENSRNOG00000004210	1	0	0	0	0	0	0	1	0	1
MIMAT0001538	rno-miR-429	Ostc	362040	ENSRNOG00000023322	1	0	0	0	0	0	0	1	0	1
MIMAT0001538	rno-miR-429	Oxr1	117520	ENSRNOG00000056487	1	0	0	0	0	0	0	1	0	1
MIMAT0001538	rno-miR-429	P2rx2	114115	ENSRNOG00000037456	0	1	0	0	0	0	0	1	0	1
MIMAT0001538	rno-miR-429	Pak7	311450	ENSRNOG00000005509	1	0	0	0	0	0	0	1	0	1
MIMAT0001538	rno-miR-429	Pam	25508	ENSRNOG00000033280	1	0	0	0	0	0	0	1	0	1
MIMAT0001538	rno-miR-429	Pan3	360760	ENSRNOG00000000942	1	0	0	0	0	0	0	1	0	1
MIMAT0001538	rno-miR-429	Panx2	362979	ENSRNOG00000055530	1	0	0	0	0	0	0	1	0	1
MIMAT0001538	rno-miR-429	Papd5	307745	ENSRNOG00000024212	2	0	0	0	0	0	0	1	0	1
MIMAT0001538	rno-miR-429	Papola	314417	ENSRNOG00000004827	1	0	0	0	0	0	0	1	0	1
MIMAT0001538	rno-miR-429	Parpbp	100310874	ENSRNOG00000004682	1	0	0	0	0	0	0	1	0	1
MIMAT0001538	rno-miR-429	Patz1	305471	ENSRNOG00000018709	1	0	0	0	0	0	0	1	0	1
MIMAT0001538	rno-miR-429	Pawr	64513	ENSRNOG00000005917	0	0	1	0	0	0	0	1	0	1
MIMAT0001538	rno-miR-429	Pcca	687008	ENSRNOG00000014146	0	1	0	0	0	0	0	1	0	1
MIMAT0001538	rno-miR-429	Pcdh19	317183	ENSRNOG00000003929	1	0	0	0	0	0	0	1	0	1
MIMAT0001538	rno-miR-429	Pdlim5	64353	ENSRNOG00000016419	0	1	0	0	0	0	0	1	0	1
MIMAT0001538	rno-miR-429	Pds5b	304218	ENSRNOG00000001098	1	0	0	0	0	0	0	1	0	1
MIMAT0001538	rno-miR-429	Pfdn4	100366237	ENSRNOG00000050932	1	0	0	0	0	0	0	1	0	1
MIMAT0001538	rno-miR-429	Pfkfb2	24640	ENSRNOG00000004162	1	0	0	0	0	0	0	1	0	1
MIMAT0001538	rno-miR-429	Pgrmc1		ENSRNOG00000012786	1	0	0	0	0	0	0	1	0	1
MIMAT0001538	rno-miR-429	Phf21a	362166	ENSRNOG00000006063	1	0	0	0	0	0	0	1	0	1
MIMAT0001538	rno-miR-429	Phldb1	171434	ENSRNOG00000026985	1	0	0	0	0	0	0	1	0	1
MIMAT0001538	rno-miR-429	Phtf2_predicted			0	1	0	0	0	0	0	1	0	1
MIMAT0001538	rno-miR-429	Phtf2	296762	ENSRNOG00000013517	1	0	0	0	0	0	0	1	0	1
MIMAT0001538	rno-miR-429	Pi4kb	81747	ENSRNOG00000021024	1	0	0	0	0	0	0	1	0	1
MIMAT0001538	rno-miR-429	Piga	363464	ENSRNOG00000003554	1	0	0	0	0	0	0	1	0	1
MIMAT0001538	rno-miR-429	Pigm	79112	ENSRNOG00000007735	1	0	0	0	0	0	0	1	0	1
MIMAT0001538	rno-miR-429	Pim2	317366	ENSRNOG00000008177	1	0	0	0	0	0	0	1	0	1
MIMAT0001538	rno-miR-429	Pisd	681361	ENSRNOG00000018319	1	0	0	0	0	0	0	1	0	1
MIMAT0001538	rno-miR-429	Pitpnb	114561	ENSRNOG00000000665	0	0	2	0	0	0	0	1	0	1
MIMAT0001538	rno-miR-429	Pitpnm1	361694	ENSRNOG00000018553	0	1	0	0	0	0	0	1	0	1
MIMAT0001538	rno-miR-429	Plcg1	25738	ENSRNOG00000051490	1	0	0	0	0	0	0	1	0	1
MIMAT0001538	rno-miR-429	Plcxd2	363781	ENSRNOG00000042289	1	0	0	0	0	0	0	1	0	1
MIMAT0001538	rno-miR-429	Plekha5	246237	ENSRNOG00000008747	0	1	0	0	0	0	0	1	0	1
MIMAT0001538	rno-miR-429	Plpp3	192270	ENSRNOG00000008116	0	0	0	1	0	0	0	1	0	1
MIMAT0001538	rno-miR-429	Pls3	81748	ENSRNOG00000027520	1	0	0	0	0	0	0	1	0	1
MIMAT0001538	rno-miR-429	Plxna2	289392	ENSRNOG00000007324	1	0	0	0	0	0	0	1	0	1
MIMAT0001538	rno-miR-429	Ppapdc2	619549	ENSRNOG00000015268	1	0	0	0	0	0	0	1	0	1
MIMAT0001538	rno-miR-429	Ppm1b	24667	ENSRNOG00000030667	1	0	0	0	0	0	0	1	0	1
MIMAT0001538	rno-miR-429	Ppp2r5e	299147	ENSRNOG00000005045	1	0	0	0	0	0	0	1	0	1
MIMAT0001538	rno-miR-429	Prdm1	309871	ENSRNOG00000000323	1	0	0	0	0	0	0	1	0	1
MIMAT0001538	rno-miR-429	Prdx2	29338	ENSRNOG00000003520	1	0	0	0	0	0	0	1	0	1
MIMAT0001538	rno-miR-429	Prkar2b	24679	ENSRNOG00000009079	1	0	0	0	0	0	0	1	0	1
MIMAT0001538	rno-miR-429	Prkcb	25023	ENSRNOG00000012061	1	0	0	0	0	0	0	1	0	1
MIMAT0001538	rno-miR-429	Prkcn			0	1	0	0	0	0	0	1	0	1
MIMAT0001538	rno-miR-429	Prpf39_predicted			0	1	0	0	0	0	0	1	0	1
MIMAT0001538	rno-miR-429	Psme4	498433	ENSRNOG00000060340	1	0	0	0	0	0	0	1	0	1
MIMAT0001538	rno-miR-429	Ptbp1	29497	ENSRNOG00000010448	1	0	0	0	0	0	0	1	0	1
MIMAT0001538	rno-miR-429	Ptdss1	314553	ENSRNOG00000052289	1	0	0	0	0	0	0	1	0	1
MIMAT0001538	rno-miR-429	Ptpn11	25622	ENSRNOG00000030124	1	0	0	0	0	0	0	1	0	1
MIMAT0001538	rno-miR-429	Ptpn12	117255	ENSRNOG00000013135	1	0	0	0	0	0	0	1	0	1
MIMAT0001538	rno-miR-429	Ptpn21	171070	ENSRNOG00000060568	0	0	0	1	0	0	0	1	0	1
MIMAT0001538	rno-miR-429	Ptprz1	25613	ENSRNOG00000006030	1	0	0	0	0	0	0	1	0	1
MIMAT0001538	rno-miR-429	Pum2	298874	ENSRNOG00000006180	1	0	0	0	0	0	0	1	0	1
MIMAT0001538	rno-miR-429	Pvrl4	498281	ENSRNOG00000004029	1	0	0	0	0	0	0	1	0	1
MIMAT0001538	rno-miR-429	Q5EB79_RAT			0	1	0	0	0	0	0	1	0	1
MIMAT0001538	rno-miR-429	Q63169_RAT			0	1	0	0	0	0	0	1	0	1
MIMAT0001538	rno-miR-429	Q9CUK2_MOUSE			0	1	0	0	0	0	0	1	0	1
MIMAT0001538	rno-miR-429	R3hdm2	362894	ENSRNOG00000007801	1	0	0	0	0	0	0	1	0	1
MIMAT0001538	rno-miR-429	Rabif	304807	ENSRNOG00000045814	1	0	0	0	0	0	0	1	0	1
MIMAT0001538	rno-miR-429	Rai2	501555	ENSRNOG00000006670	1	0	0	0	0	0	0	1	0	1
MIMAT0001538	rno-miR-429	Ranbp10	361396	ENSRNOG00000018000	2	0	0	0	0	0	0	1	0	1
MIMAT0001538	rno-miR-429	Ranbp6	309326	ENSRNOG00000053859	1	0	0	0	0	0	0	1	0	1
MIMAT0001538	rno-miR-429	Rap1b	171337	ENSRNOG00000007048	0	0	1	0	0	0	0	1	0	1
MIMAT0001538	rno-miR-429	Rapgef2	310533	ENSRNOG00000021581	1	0	0	0	0	0	0	1	0	1
MIMAT0001538	rno-miR-429	Rbm20	309544	ENSRNOG00000014705	1	0	0	0	0	0	0	1	0	1
MIMAT0001538	rno-miR-429	Rbm44	501183	ENSRNOG00000024878	0	1	0	0	0	0	0	1	0	1
MIMAT0001538	rno-miR-429	Rbm45	266631	ENSRNOG00000010595	0	0	1	0	0	0	0	1	0	1
MIMAT0001538	rno-miR-429	Rec114	300751	ENSRNOG00000009332	1	0	0	0	0	0	0	1	0	1
MIMAT0001538	rno-miR-429	Reck	313488	ENSRNOG00000014863	1	0	0	0	0	0	0	1	0	1
MIMAT0001538	rno-miR-429	Reep1	362384	ENSRNOG00000008481	1	0	0	0	0	0	0	1	0	1
MIMAT0001538	rno-miR-429	Rev1	316344	ENSRNOG00000018623	1	0	0	0	0	0	0	1	0	1
MIMAT0001538	rno-miR-429	RGD1305110	305579	ENSRNOG00000005548	0	1	0	0	0	0	0	1	0	1
MIMAT0001538	rno-miR-429	RGD1305455	288545	ENSRNOG00000039214	1	0	0	0	0	0	0	1	0	1
MIMAT0001538	rno-miR-429	RGD1306437			0	1	0	0	0	0	0	1	0	1
MIMAT0001538	rno-miR-429	RGD1307235	309053	ENSRNOG00000015508	1	0	0	0	0	0	0	1	0	1
MIMAT0001538	rno-miR-429	RGD1309079	315891	ENSRNOG00000008519	0	0	0	1	0	0	0	1	0	1
MIMAT0001538	rno-miR-429	RGD1309748	302913	ENSRNOG00000002545	1	0	0	0	0	0	0	1	0	1
MIMAT0001538	rno-miR-429	RGD1309779_predicted			0	1	0	0	0	0	0	1	0	1
MIMAT0001538	rno-miR-429	RGD1309779	363074	ENSRNOG00000008340	1	0	0	0	0	0	0	1	0	1
MIMAT0001538	rno-miR-429	RGD1309903	292947	ENSRNOG00000011460	0	1	0	0	0	0	0	1	0	1
MIMAT0001538	rno-miR-429	RGD1310016	309306	ENSRNOG00000016172	1	0	0	0	0	0	0	1	0	1
MIMAT0001538	rno-miR-429	RGD1310553	301374	ENSRNOG00000016447	2	0	0	0	0	0	0	1	0	1
MIMAT0001538	rno-miR-429	RGD1310951	100361585	ENSRNOG00000016780	0	1	0	0	0	0	0	1	0	1
MIMAT0001538	rno-miR-429	RGD1311458	303948	ENSRNOG00000013721	0	1	0	0	0	0	0	1	0	1
MIMAT0001538	rno-miR-429	RGD1359460			0	1	0	0	0	0	0	1	0	1
MIMAT0001538	rno-miR-429	RGD1560263	100363472	ENSRNOG00000000641	1	0	0	0	0	0	0	1	0	1
MIMAT0001538	rno-miR-429	RGD1560493_predicted			0	1	0	0	0	0	0	1	0	1
MIMAT0001538	rno-miR-429	RGD1560685		ENSRNOG00000013839	0	1	0	0	0	0	0	1	0	1
MIMAT0001538	rno-miR-429	RGD1561306	494206	ENSRNOG00000033699	0	1	0	0	0	0	0	1	0	1
MIMAT0001538	rno-miR-429	RGD1561465_predicted			0	1	0	0	0	0	0	1	0	1
MIMAT0001538	rno-miR-429	RGD1563962	304807	ENSRNOG00000045814	1	0	0	0	0	0	0	1	0	1
MIMAT0001538	rno-miR-429	RGD1564243	291174	ENSRNOG00000015276	0	1	0	0	0	0	0	1	0	1
MIMAT0001538	rno-miR-429	RGD1564434_predicted			0	1	0	0	0	0	0	1	0	1
MIMAT0001538	rno-miR-429	RGD1564875_predicted			0	1	0	0	0	0	0	1	0	1
MIMAT0001538	rno-miR-429	RGD1565282_predicted			0	1	0	0	0	0	0	1	0	1
MIMAT0001538	rno-miR-429	RGD1566021_predicted			0	1	0	0	0	0	0	1	0	1
MIMAT0001538	rno-miR-429	Rhoq	100911716	ENSRNOG00000015415	1	0	0	0	0	0	0	1	0	1
MIMAT0001538	rno-miR-429	Rhot1	303351	ENSRNOG00000004093	1	0	0	0	0	0	0	1	0	1
MIMAT0001538	rno-miR-429	Ric1	309306	ENSRNOG00000016172	0	0	0	1	0	0	0	1	0	1
MIMAT0001538	rno-miR-429	Ripk2	362491	ENSRNOG00000009389	2	0	0	0	0	0	0	1	0	1
MIMAT0001538	rno-miR-429	Rlf	313566	ENSRNOG00000027921	1	0	0	0	0	0	0	1	0	1
MIMAT0001538	rno-miR-429	Rnf166	365022	ENSRNOG00000013777	0	0	1	0	0	0	0	1	0	1
MIMAT0001538	rno-miR-429	Rnf168	690043	ENSRNOG00000043345	0	0	0	1	0	0	0	1	0	1
MIMAT0001538	rno-miR-429	Rnf169	685009	ENSRNOG00000026408	0	0	0	1	0	0	0	1	0	1
MIMAT0001538	rno-miR-429	Rnf19a	362900	ENSRNOG00000009658	2	0	0	0	0	0	0	1	0	1
MIMAT0001538	rno-miR-429	Rnf39	171387	ENSRNOG00000000781	1	0	0	0	0	0	0	1	0	1
MIMAT0001538	rno-miR-429	Rnf5	407784	ENSRNOG00000000438	1	0	0	0	0	0	0	1	0	1
MIMAT0001538	rno-miR-429	Rngtt	313131	ENSRNOG00000007867	1	0	0	0	0	0	0	1	0	1
MIMAT0001538	rno-miR-429	Rpl19	81767	ENSRNOG00000004741	0	0	1	0	0	0	0	1	0	1
MIMAT0001538	rno-miR-429	Rpl26-ps1		ENSRNOG00000032777	0	1	0	0	0	0	0	1	0	1
MIMAT0001538	rno-miR-429	Rps6ka2	117269	ENSRNOG00000013194	1	0	0	0	0	0	0	1	0	1
MIMAT0001538	rno-miR-429	Rps6ka3	501560	ENSRNOG00000006632	1	0	0	0	0	0	0	1	0	1
MIMAT0001538	rno-miR-429	Rqcd1	301513	ENSRNOG00000016034	2	0	0	0	0	0	0	1	0	1
MIMAT0001538	rno-miR-429	RragB	100909655	ENSRNOG00000003160	1	0	0	0	0	0	0	1	0	1
MIMAT0001538	rno-miR-429	Rtf1	366169	ENSRNOG00000005183	1	0	0	0	0	0	0	1	0	1
MIMAT0001538	rno-miR-429	Rtp4	360733	ENSRNOG00000028895	0	1	0	0	0	0	0	1	0	1
MIMAT0001538	rno-miR-429	S100pbp	500551	ENSRNOG00000007099	1	0	0	0	0	0	0	1	0	1
MIMAT0001538	rno-miR-429	Saa4	308598	ENSRNOG00000055531	0	1	0	0	0	0	0	1	0	1
MIMAT0001538	rno-miR-429	Scamp1	29521	ENSRNOG00000010774	2	0	0	0	0	0	0	1	0	1
MIMAT0001538	rno-miR-429	Scd	100912469	ENSRNOG00000046005	1	0	0	0	0	0	0	1	0	1
MIMAT0001538	rno-miR-429	Schip1	295105	ENSRNOG00000009276	1	0	0	0	0	0	0	1	0	1
MIMAT0001538	rno-miR-429	Scn2a1	24766		0	0	1	0	0	0	0	1	0	1
MIMAT0001538	rno-miR-429	Scn3b	245956	ENSRNOG00000057221	1	0	0	0	0	0	0	1	0	1
MIMAT0001538	rno-miR-429	Scn5a	25665	ENSRNOG00000015049	2	0	0	0	0	0	0	1	0	1
MIMAT0001538	rno-miR-429	Scoc	364981	ENSRNOG00000003853	0	0	1	0	0	0	0	1	0	1
MIMAT0001538	rno-miR-429	Sdc2	25615	ENSRNOG00000004936	1	0	0	0	0	0	0	1	0	1
MIMAT0001538	rno-miR-429	Sdha	157074	ENSRNOG00000013331	0	1	0	0	0	0	0	1	0	1
MIMAT0001538	rno-miR-429	Sema3f	315996	ENSRNOG00000017704	1	0	0	0	0	0	0	1	0	1
MIMAT0001538	rno-miR-429	Sema6d	311384	ENSRNOG00000004812	2	0	0	0	0	0	0	1	0	1
MIMAT0001538	rno-miR-429	Senp5	303874	ENSRNOG00000048136	1	0	0	0	0	0	0	1	0	1
MIMAT0001538	rno-miR-429	Sephs1	291314	ENSRNOG00000018125	1	0	0	0	0	0	0	1	0	1
MIMAT0001538	rno-miR-429	Serinc1	294421	ENSRNOG00000029360	1	0	0	0	0	0	0	1	0	1
MIMAT0001538	rno-miR-429	Serpina7	81806	ENSRNOG00000011081	0	1	0	0	0	0	0	1	0	1
MIMAT0001538	rno-miR-429	Sgcb	680229	ENSRNOG00000002135	2	0	0	0	0	0	0	1	0	1
MIMAT0001538	rno-miR-429	Sgms2	310849	ENSRNOG00000011284	1	0	0	0	0	0	0	1	0	1
MIMAT0001538	rno-miR-429	Shc1	85385	ENSRNOG00000020657	1	0	0	0	0	0	0	1	0	1
MIMAT0001538	rno-miR-429	Sin3a	363067	ENSRNOG00000032254	1	0	0	0	0	0	0	1	0	1
MIMAT0001538	rno-miR-429	Six1	114634	ENSRNOG00000022777	1	0	0	0	0	0	0	1	0	1
MIMAT0001538	rno-miR-429	Slc16a1	25027	ENSRNOG00000019996	1	0	0	0	0	0	0	1	0	1
MIMAT0001538	rno-miR-429	Slc22a25	192273	ENSRNOG00000017964	0	0	1	0	0	0	0	1	0	1
MIMAT0001538	rno-miR-429	Slc2a5	65197	ENSRNOG00000017693	0	1	0	0	0	0	0	1	0	1
MIMAT0001538	rno-miR-429	Slc30a4	64469	ENSRNOG00000000170	2	0	0	0	0	0	0	1	0	1
MIMAT0001538	rno-miR-429	Slc35a2	100158233	ENSRNOG00000024801	2	0	0	0	0	0	0	1	0	1
MIMAT0001538	rno-miR-429	Slc38a2	29642	ENSRNOG00000006305	2	0	0	0	0	0	0	1	0	1
MIMAT0001538	rno-miR-429	Slc6a15	282712	ENSRNOG00000027468	1	0	0	0	0	0	0	1	0	1
MIMAT0001538	rno-miR-429	Smad5	59328	ENSRNOG00000022870	0	0	1	0	0	0	0	1	0	1
MIMAT0001538	rno-miR-429	Smad7	81516	ENSRNOG00000018359	1	0	0	0	0	0	0	1	0	1
MIMAT0001538	rno-miR-429	Smarcd1	363002	ENSRNOG00000061572	1	0	0	0	0	0	0	1	0	1
MIMAT0001538	rno-miR-429	Smg8	287596	ENSRNOG00000005769	1	0	0	0	0	0	0	1	0	1
MIMAT0001538	rno-miR-429	Smim11	100174909	ENSRNOG00000039877	1	0	0	0	0	0	0	1	0	1
MIMAT0001538	rno-miR-429	Smim5	689926	ENSRNOG00000049642	1	0	0	0	0	0	0	1	0	1
MIMAT0001538	rno-miR-429	Smurf2	303614	ENSRNOG00000014623	1	0	0	0	0	0	0	1	0	1
MIMAT0001538	rno-miR-429	Snap25	25012	ENSRNOG00000006037	2	0	0	0	0	0	0	1	0	1
MIMAT0001538	rno-miR-429	Snrpn	688682	ENSRNOG00000015976	1	0	0	0	0	0	0	1	0	1
MIMAT0001538	rno-miR-429	Socs5	500616	ENSRNOG00000028504	1	0	0	0	0	0	0	1	0	1
MIMAT0001538	rno-miR-429	Sox2	499593	ENSRNOG00000012199	1	0	0	0	0	0	0	1	0	1
MIMAT0001538	rno-miR-429	Sp1	24790	ENSRNOG00000014084	1	0	0	0	0	0	0	1	0	1
MIMAT0001538	rno-miR-429	Spag9	360600	ENSRNOG00000002749	2	0	0	0	0	0	0	1	0	1
MIMAT0001538	rno-miR-429	Sptssa	500651	ENSRNOG00000004292	1	0	0	0	0	0	0	1	0	1
MIMAT0001538	rno-miR-429	Sqle	29230	ENSRNOG00000009550	1	0	0	0	0	0	0	1	0	1
MIMAT0001538	rno-miR-429	Srf	501099	ENSRNOG00000018232	2	0	0	0	0	0	0	1	0	1
MIMAT0001538	rno-miR-429	Stard13	498130	ENSRNOG00000001090	1	0	0	0	0	0	0	1	0	1
MIMAT0001538	rno-miR-429	Stx12	65033	ENSRNOG00000011804	1	0	0	0	0	0	0	1	0	1
MIMAT0001538	rno-miR-429	Stx1a	116470	ENSRNOG00000029165	1	0	0	0	0	0	0	1	0	1
MIMAT0001538	rno-miR-429	Stxbp4_predicted			0	1	0	0	0	0	0	1	0	1
MIMAT0001538	rno-miR-429	Sumo1	301442	ENSRNOG00000016133	0	0	1	0	0	0	0	1	0	1
MIMAT0001538	rno-miR-429	Surf4	102553670	ENSRNOG00000047585	1	0	0	0	0	0	0	1	0	1
MIMAT0001538	rno-miR-429	Suv420h1	361688	ENSRNOG00000016790	1	0	0	0	0	0	0	1	0	1
[truncated: 2,125 more rows]
