# Supplementary material for: Integrated Analysis of Omics Data Reveal AP-1 as a Potential Regulation Hub in the Inflammation-Induced Hyperalgesia Rat Model
Source: Front Immunol. 2021 May 28;12:672498. doi: 10.3389/fimmu.2021.672498 (PMC8194263; doi:10.3389/fimmu.2021.672498)
Supplement: Supplementary file 8 [file Table_7.xlsx]

## Sheet: Sheet1
motif_ID	motif_alt_ID	consensus	p.value	adj_p.value	E.value	tests	FASTA_max	pos	neg	PWM_min	TP	X.TP	FP	X.FP
UP00029_1	Tbp_primary	NYHWTWTATAWAWHTN	8.91e-36	5.66e-33	1.01e-29	635	2661	2661	2661	1.05	462	17.36	172	6.46
UP00097_2	Mtf1_secondary	ANATAWGAAAWADV	1.28e-32	2.45e-29	4.38e-26	1911	2661	2661	2661	1.33	959	36.04	569	21.38
MA0346.1	NHP6B	YNTHHYWATATATWWWRDDN	7.93e-32	6.83e-29	1.22e-25	862	2661	2661	2661	2.12	432	16.23	166	6.24
MA0929.1	NCU00019	NNDGTAAAYAHA	1.84e-30	1.99e-27	3.57e-24	1083	2661	2661	2661	2.03	460	17.29	190	7.14
UP00255_1	Dbx1_3486.1	YARTWAATTAWTAAWNR	6.71e-29	6.91e-26	1.24e-22	1029	2661	2661	2661	2.18	454	17.06	192	7.22
MA0356.1	PHO2	WTAWTW	2.17e-28	2.37e-25	4.25e-22	1092	2661	2661	2661	1.21	616	23.15	313	11.76
MA0528.1	ZNF263	GGAGGAGGRRGRGGRGGRRGR	1e-27	1.32e-24	2.36e-21	1318	2661	2661	2661	1.56	759	28.52	430	16.16
UP00071_1	Sox21_primary	HHHWATTATAATWDDD	6.47e-27	4.01e-24	7.18e-21	620	2661	2661	2661	1.32	384	14.43	152	5.71
MA0345.1	NHP6A	NWDHHYWMTATATAAWWWWDH	6.62e-27	4.09e-24	7.31e-21	617	2661	2661	2661	1.71	352	13.23	131	4.92
MA0846.1	FOXC2	WAWGTAAACAWW	9.32e-27	8.33e-24	1.49e-20	893	2661	2661	2661	1.04	591	22.21	302	11.35
MA0165.1	Abd-B	TTTATKA	2.42e-26	2.35e-23	4.21e-20	970	2661	2661	2661	1.26	566	21.27	285	10.71
UP00036_2	Myf6_secondary	VNNRACAGVCGCRCC	1.32e-26	3.99e-23	7.14e-20	3028	2661	2661	2661	1.09	1583	59.49	1196	44.95
MA0543.1	eor-1	RRAGAGASRSAGAGA	1.9e-25	2.22e-22	3.97e-19	1170	2661	2661	2661	1.95	581	21.83	301	11.31
UP00061_1	Foxl1_primary	DWAATRTAAACAAWVVB	7.38e-25	2.92e-22	5.23e-19	396	2661	2661	2661	1.21	284	10.67	95	3.57
MA0852.2	FOXK1	NRDGTAAACAAGNN	6.8e-25	5.48e-22	9.82e-19	806	2661	2661	2661	1.21	483	18.15	230	8.64
UP00054_2	Tcf7_secondary	MBKTATTANAAAHHN	1.15e-24	1.36e-21	2.44e-18	1183	2661	2661	2661	1.3	577	21.68	302	11.35
MA0026.1	Eip74EF	CCGGAAR	8.95e-25	1.44e-21	2.58e-18	1613	2661	2661	2661	1.03	966	36.3	625	23.49
MA0497.1	MEF2C	DDDCYAAAAATAGMW	2.94e-24	1.58e-21	2.83e-18	537	2661	2661	2661	1.24	354	13.3	142	5.34
UP00025_1	Foxk1_primary	NRAATGTAAACAAAVNB	3.84e-24	1.78e-21	3.18e-18	463	2661	2661	2661	1.18	323	12.14	122	4.58
UP00073_1	Foxa2_primary	HWWAWGTAAAYAAANNN	4.07e-24	2.38e-21	4.25e-18	584	2661	2661	2661	1.99	301	11.31	108	4.06
UP00039_1	Foxj3_primary	NDAADGTAAACAAANNM	4.51e-24	3.08e-21	5.51e-18	683	2661	2661	2661	2.81	296	11.12	105	3.95
UP00024_2	Glis2_secondary	HDTATTAWTAAAGV	5.01e-24	5.17e-21	9.25e-18	1031	2661	2661	2661	1.17	597	22.44	321	12.06
UP00041_1	Foxj1_primary	ANHRTAAACAAANNND	5.26e-24	7e-21	1.25e-17	1330	2661	2661	2661	4.79	336	12.63	131	4.92
MA0601.1	Arid3b	ATATTAATWAN	1.13e-23	7.51e-21	1.34e-17	666	2661	2661	2661	1.23	420	15.78	190	7.14
UP00094_2	Zfp128_secondary	NGTATAYDTATAMN	8.76e-24	8.01e-21	1.43e-17	915	2661	2661	2661	1.35	465	17.47	222	8.34
UP00101_2	Sox12_secondary	VVNBASACAAAGRADT	4.89e-24	1.06e-20	1.89e-17	2165	2661	2661	2661	1.05	1257	47.24	897	33.71
MA1233.1	AT1G71450	CDCCRCCRCCDCCRCCGYCR	3.27e-23	2.18e-20	3.91e-17	667	2661	2661	2661	1.17	438	16.46	205	7.7
MA0850.1	FOXP3	RTAAACA	1.59e-23	2.24e-20	4.01e-17	1409	2661	2661	2661	1.83	517	19.43	262	9.85
UP00073_2	Foxa2_secondary	VVWAATAACAAANSN	2.19e-23	3.72e-20	6.66e-17	1695	2661	2661	2661	2.54	446	16.76	210	7.89
MA1267.1	AT5G66940	WHTTTTTTHYTTTTTACTTTTTNHTTTWW	8e-23	4.63e-20	8.29e-17	579	2661	2661	2661	2.65	385	14.47	169	6.35
MA0847.1	FOXD2	GTAAACA	4.04e-23	6.39e-20	1.14e-16	1583	2661	2661	2661	2.78	340	12.78	137	5.15
MA0210.1	ara	WAACA	7.15e-23	1.54e-19	2.76e-16	2156	2661	2661	2661	1.34	936	35.17	612	23
MA0934.1	AHL25	AWTTAAWT	2.88e-22	2.11e-19	3.79e-16	734	2661	2661	2661	1.05	482	18.11	242	9.09
MA0593.1	FOXP2	RWGTAAACAVR	4.84e-22	2.59e-19	4.64e-16	536	2661	2661	2661	1.13	363	13.64	157	5.9
MA0045.1	HMG-I/Y	VWAVAAAHRVMRAMAY	1.83e-22	2.75e-19	4.92e-16	1505	2661	2661	2661	2.79	563	21.16	303	11.39
MA0933.1	AHL20	AATTAAWT	4.48e-22	3.41e-19	6.11e-16	761	2661	2661	2661	1.08	490	18.41	249	9.36
UP00244_1	Tlx2_3498.2	KAATYAATTAATAAYWW	5.91e-22	3.46e-19	6.19e-16	585	2661	2661	2661	1.18	391	14.69	177	6.65
MA0448.1	H2.0	TTWATDA	8.02e-22	6.96e-19	1.25e-15	867	2661	2661	2661	1.81	376	14.13	167	6.28
MA0032.2	FOXC1	WAWGTAAAYAW	1.46e-21	1.02e-18	1.82e-15	696	2661	2661	2661	1.14	441	16.57	215	8.08
UP00077_2	Srf_secondary	STWNAAAAAAAAMVNNH	6.45e-22	1.13e-18	2.02e-15	1748	2661	2661	2661	1.47	870	32.69	561	21.08
MA0851.1	Foxj3	NDAADGTAAACAAANNM	2.17e-21	1.33e-18	2.38e-15	613	2661	2661	2661	2.97	272	10.22	99	3.72
MA0050.2	IRF1	NTTYASTTTCACTTTCDBTTT	3.07e-21	1.42e-18	2.54e-15	461	2661	2661	2661	2.97	252	9.47	87	3.27
UP00090_2	Elf3_secondary	GBTCHAAAAAAAAMYNY	1.6e-21	2.29e-18	4.1e-15	1429	2661	2661	2661	2.71	502	18.87	261	9.81
UP00061_2	Foxl1_secondary	ADATYAWAACAAMANM	2.91e-21	3.91e-18	7e-15	1344	2661	2661	2661	4.19	402	15.11	188	7.07
UP00078_1	Arid3a_primary	SNNHTTAATTAAAMNHN	7.07e-21	5.85e-18	1.05e-14	827	2661	2661	2661	1.15	504	18.94	266	10
MA0899.1	HOXA10	DGYMATAAAAH	8.13e-21	7.02e-18	1.26e-14	863	2661	2661	2661	1.78	388	14.58	180	6.76
UP00090_1	Elf3_primary	DAHVMGGAARTWA	7.73e-21	8.08e-18	1.45e-14	1045	2661	2661	2661	1.03	657	24.69	388	14.58
UP00013_2	Gabpa_secondary	CYNKYWTCCSMYBNVN	3.02e-21	8.7e-18	1.56e-14	2876	2661	2661	2661	1.24	1134	42.62	804	30.21
UP00217_1	Hoxa10_2318.1	DMKGYAATAAAATKHW	1.8e-20	1.08e-17	1.93e-14	600	2661	2661	2661	1.76	320	12.03	134	5.04
MA0233.1	mirr	WAACA	7.78e-21	1.78e-17	3.18e-14	2286	2661	2661	2661	2.03	550	20.67	302	11.35
MA1103.1	FOXK2	WDGTAAACANV	4.96e-20	3.81e-17	6.81e-14	768	2661	2661	2661	1.17	464	17.44	240	9.02
MA0033.2	FOXL1	RTAAACA	5.12e-20	4.63e-17	8.28e-14	904	2661	2661	2661	2.91	295	11.09	119	4.47
MA0514.1	Sox3	CCTTTGTYYY	4.12e-20	4.83e-17	8.65e-14	1174	2661	2661	2661	4.31	446	16.76	226	8.49
MA0481.2	FOXP1	NDGTAAACAGNN	5.86e-20	4.99e-17	8.93e-14	851	2661	2661	2661	1.08	527	19.8	289	10.86
MA1274.1	OBP3	TTTWCTTTTTHHYTTTTTTTT	1.36e-19	9.78e-17	1.75e-13	718	2661	2661	2661	7.25	294	11.05	120	4.51
MA0081.1	SPIB	WGMGGAA	9.69e-20	1.85e-16	3.32e-13	1913	2661	2661	2661	1.95	758	28.49	480	18.04
UP00188_1	Lmx1a_2238.2	CGWWTTAATTAAWWWHY	7.29e-19	2.62e-16	4.69e-13	359	2661	2661	2661	1.19	247	9.28	92	3.46
MA0305.1	GCR2	GCTTCCH	1.24e-19	2.76e-16	4.94e-13	2219	2661	2661	2661	1.66	970	36.45	667	25.07
MA0002.2	RUNX1	BBYTGTGGTTT	1.49e-19	3.29e-16	5.89e-13	2205	2661	2661	2661	2.4	665	24.99	403	15.14
UP00121_1	Hoxd10_2368.2	VRKNYAATAAAATDDWN	8.22e-19	5.53e-16	9.91e-13	673	2661	2661	2661	1.68	368	13.83	175	6.58
MA1281.1	AT5G02460	RAAAAAGWAAAAARAAAAARA	1.51e-18	1.01e-15	1.81e-12	669	2661	2661	2661	1.37	439	16.5	229	8.61
MA0041.1	Foxd3	GWWTGTTTDTTT	1.56e-18	1.12e-15	2.01e-12	719	2661	2661	2661	1.46	427	16.05	220	8.27
MA0136.2	ELF5	AMSMGGAAGTD	1.17e-18	1.39e-15	2.49e-12	1194	2661	2661	2661	1.05	716	26.91	452	16.99
MA0913.1	Hoxd9	GYAATWAAAW	2.74e-18	2.62e-15	4.68e-12	954	2661	2661	2661	1.32	517	19.43	291	10.94
MA0878.1	CDX1	GYMATAAAA	6.63e-18	4.82e-15	8.62e-12	727	2661	2661	2661	1.17	437	16.42	231	8.68
UP00028_2	Tcfap2e_secondary	HRCNNRAAAAAAWR	2.49e-18	4.94e-15	8.85e-12	1985	2661	2661	2661	1.2	1035	38.9	737	27.7
UP00225_1	Hlx1_2350.1	CMATAATTAATTAYH	9.84e-18	6.47e-15	1.16e-11	658	2661	2661	2661	1.35	369	13.87	181	6.8
MA0013.1	br(var.4)	TWRTAAACWAW	8.64e-18	8.2e-15	1.47e-11	950	2661	2661	2661	2.08	444	16.69	237	8.91
MA1107.1	KLF9	VSCCACACCCACH	7.71e-18	1.34e-14	2.4e-11	1741	2661	2661	2661	1.09	1002	37.66	711	26.72
MA0750.2	ZBTB7A	NVCCGGAAGTGSV	2.02e-17	1.85e-14	3.31e-11	916	2661	2661	2661	1.1	544	20.44	318	11.95
UP00213_1	Hoxa9_2622.2	RCGGYCATWAAAWTADW	3.87e-17	2.2e-14	3.94e-11	569	2661	2661	2661	1.32	343	12.89	165	6.2
MA0458.1	slp1	DTGTTTAYRYW	1.83e-17	2.24e-14	4.02e-11	1228	2661	2661	2661	2.45	439	16.5	235	8.83
MA1262.1	ERF2	YCDCCDCCDCCGCCGCCRYYD	6.55e-17	2.54e-14	4.55e-11	388	2661	2661	2661	2.41	206	7.74	73	2.74
MA0703.1	LMX1B	NYAATTAA	8.22e-17	8.08e-14	1.45e-10	983	2661	2661	2661	1.08	571	21.46	344	12.93
MA0910.1	Hoxd8	TAADTAATTAATRGCTN	3.26e-16	1.26e-13	2.26e-10	387	2661	2661	2661	1.12	269	10.11	117	4.4
MA1226.1	AT5G18450	GGHGGAGGCGGTGGH	2.36e-16	1.3e-13	2.32e-10	549	2661	2661	2661	5.19	175	6.58	56	2.1
MA0120.1	id1	TTKYYYYTHBCG	6.95e-17	1.41e-13	2.53e-10	2035	2661	2661	2661	1.05	1135	42.65	843	31.68
UP00168_1	Hoxd8_2644.1	TAADTAATTAATRGCTN	3.72e-16	1.49e-13	2.66e-10	400	2661	2661	2661	1.15	273	10.26	120	4.51
MA0152.1	NFATC2	TTTTCCA	1.26e-16	2.02e-13	3.61e-10	1596	2661	2661	2661	1.03	931	34.99	657	24.69
MA0537.1	blmp-1	RAAAGWGARAR	2.95e-16	2.86e-13	5.12e-10	969	2661	2661	2661	1.07	593	22.28	366	13.75
UP00037_1	Zfp105_primary	HDYAAAHAAMAADAD	1.51e-15	2.07e-12	3.71e-09	1371	2661	2661	2661	19.6	200	7.52	74	2.78
MA0377.1	SFL1	WHVHDNATMGAAGAAAWAWWW	2.21e-15	2.17e-12	3.89e-09	983	2661	2661	2661	1.12	595	22.36	374	14.05
UP00058_2	Tcf3_secondary	NSSSBAAWAWAAAWN	1.28e-15	2.28e-12	4.08e-09	1781	2661	2661	2661	1.42	634	23.83	405	15.22
MA0297.1	FKH2	GTAAACA	1.08e-14	3.17e-12	5.68e-09	295	2661	2661	2661	2.63	192	7.22	72	2.71
MA0920.1	fkh-2	RTAAACAH	4.23e-15	3.58e-12	6.41e-09	846	2661	2661	2661	6.56	160	6.01	51	1.92
UP00062_1	Sox4_primary	HNNWRAACAAAGRRNHW	3.47e-15	3.73e-12	6.67e-09	1075	2661	2661	2661	1.12	636	23.9	410	15.41
MA1225.1	ERF5	CCDCCGCCGCCGCCR	9.97e-15	4.32e-12	7.73e-09	433	2661	2661	2661	1.14	285	10.71	135	5.07
MA0383.1	SMP1	BNACCTWTAATTAWAHNWSVN	6.47e-15	4.92e-12	8.8e-09	760	2661	2661	2661	1.26	445	16.72	255	9.58
UP00015_1	Ehf_primary	VNNABCCGGAAGTDR	6.95e-15	5.51e-12	9.87e-09	793	2661	2661	2661	1.05	491	18.45	292	10.97
MA0442.2	SOX10	NDAACAAAGVN	5.02e-15	5.53e-12	9.9e-09	1102	2661	2661	2661	4.25	423	15.9	237	8.91
MA0076.2	ELK4	BCRCTTCCGGB	9.44e-15	6.83e-12	1.22e-08	723	2661	2661	2661	1.04	455	17.1	264	9.92
MA0480.1	Foxo1	TSYTGTTTACH	8.85e-15	7.55e-12	1.35e-08	853	2661	2661	2661	1.42	469	17.62	275	10.33
MA0599.1	KLF5	GCCCCDCCCH	5.36e-15	7.59e-12	1.36e-08	1414	2661	2661	2661	3.27	541	20.33	332	12.48
UP00004_1	Sox14_primary	DHNAATTATAATWWDN	1.92e-14	8.98e-12	1.61e-08	468	2661	2661	2661	1.06	312	11.72	156	5.86
MA0845.1	FOXB1	WATGTAAATAT	2.16e-14	1.08e-11	1.94e-08	502	2661	2661	2661	1.14	313	11.76	157	5.9
UP00158_1	Pou1f1_3818.1	DVNTAATTAATTAWNWC	3.88e-14	1.44e-11	2.58e-08	371	2661	2661	2661	1.9	195	7.33	76	2.86
MA0296.1	FKH1	NNWWWTGTAAACAAARRNGR	6.01e-14	1.59e-11	2.85e-08	265	2661	2661	2661	1.32	183	6.88	69	2.59
MA1268.1	AT1G69570	TTTTYACTTTTTYTTTTTTTTTTTTTW	5.52e-14	2.63e-11	4.71e-08	476	2661	2661	2661	2.63	306	11.5	154	5.79
UP00030_1	Sox11_primary	HNDARAACAAAGRANNH	2.8e-14	2.96e-11	5.29e-08	1057	2661	2661	2661	1.07	637	23.94	418	15.71
UP00180_1	Hoxd13_2356.1	NNNYYAATAAAAHYNN	5.66e-14	2.96e-11	5.3e-08	523	2661	2661	2661	1.58	284	10.67	138	5.19
MA1236.1	ESE3	HGGHGGHGGCGGCGGMGGW	9.87e-14	4.03e-11	7.21e-08	408	2661	2661	2661	4.23	161	6.05	56	2.1
MA1156.1	JKD	WWWWTTTTTGTCKTTTTSTD	1.56e-13	4.88e-11	8.73e-08	312	2661	2661	2661	5.91	145	5.45	47	1.77
MA1255.1	AT1G22810	GGHGGYGGCGGTGGH	1.25e-13	6.08e-11	1.09e-07	488	2661	2661	2661	1.87	248	9.32	114	4.28
MA1257.1	ERF9	YGGCGGHKRYGGCGGCGGMGR	1.58e-13	6.29e-11	1.13e-07	397	2661	2661	2661	3.33	179	6.73	68	2.56
MA1240.1	ERF10	NCCDCCNYCDCCGCCGCCRYH	1.82e-13	6.92e-11	1.24e-07	380	2661	2661	2661	1.76	218	8.19	94	3.53
MA0746.1	SP3	VCCACGCCCMC	3.67e-14	7.6e-11	1.36e-07	2072	2661	2661	2661	2.71	687	25.82	462	17.36
UP00118_1	Pou4f3_2791.1	HVTTATTAATKADKYC	3.72e-13	8.78e-11	1.57e-07	236	2661	2661	2661	1.49	148	5.56	50	1.88
MA0791.1	POU4F3	RTGMATWATTAATGAR	2.82e-13	9.48e-11	1.7e-07	336	2661	2661	2661	1.16	227	8.53	101	3.8
UP00207_1	Hoxb9_3413.1	VRRGCMATAAAAHYMD	2.26e-13	1.1e-10	1.98e-07	488	2661	2661	2661	1.07	319	11.99	167	6.28
UP00105_1	Pou3f4_3773.1	DVWTAATTAATTAANTC	3.95e-13	1.28e-10	2.29e-07	324	2661	2661	2661	1.47	189	7.1	76	2.86
MA0901.1	HOXB13	CCAATAAAAH	2.61e-13	1.38e-10	2.47e-07	529	2661	2661	2661	1.04	341	12.81	184	6.91
UP00164_1	Hoxa7_2668.2	SGMNTTAATTAATDNNC	3.07e-13	1.51e-10	2.7e-07	490	2661	2661	2661	1.08	318	11.95	167	6.28
MA0010.1	br	RTAAWWRACAARWN	1.76e-13	1.55e-10	2.78e-07	885	2661	2661	2661	5.63	237	8.91	107	4.02
MA1239.1	ERF104	CDCCDCCDCCGCCGCCRYH	4.51e-13	1.64e-10	2.93e-07	363	2661	2661	2661	23.3	83	3.12	15	0.56
MA0108.2	TBP	STATAAAWRSVVVBN	3.26e-13	1.78e-10	3.19e-07	547	2661	2661	2661	1.03	352	13.23	193	7.25
MA1327.1	ATHB23	AWWNWTAATTAATDAWWWAWTW	9.74e-13	2.09e-10	3.75e-07	215	2661	2661	2661	1.53	149	5.6	52	1.95
UP00260_1	Hoxc6_3954.2	YRAVKTAATTAMBWRNN	5.82e-13	2.44e-10	4.38e-07	420	2661	2661	2661	1.87	203	7.63	86	3.23
UP00254_1	Pou2f1_3081.2	DTDHRHTAATTARKTW	5.89e-13	2.6e-10	4.65e-07	441	2661	2661	2661	2.28	194	7.29	80	3.01
MA0790.1	POU4F1	ATGMATAATTAATG	8.45e-13	3.29e-10	5.88e-07	389	2661	2661	2661	2.07	187	7.03	76	2.86
MA0932.1	AHL12	AAWWWWTT	4.04e-13	3.42e-10	6.13e-07	847	2661	2661	2661	1.04	511	19.2	321	12.06
MA1160.1	AT1G14580	WWWWTTTTTGTCGTTTTSTK	1.29e-12	3.59e-10	6.43e-07	279	2661	2661	2661	4.85	130	4.89	41	1.54
MA0317.1	HCM1	ATAAACAA	2.37e-13	4.4e-10	7.88e-07	1853	2661	2661	2661	5.13	281	10.56	139	5.22
MA0148.3	FOXA1	YNBNTGTTTACWYWD	8.37e-13	4.64e-10	8.3e-07	554	2661	2661	2661	1.28	320	12.03	171	6.43
MA1264.1	ESE1	HGRYGGCGGCGGHGG	1.6e-12	5.38e-10	9.64e-07	337	2661	2661	2661	9.54	95	3.57	22	0.83
MA1272.1	AT2G28810	TTYTTTTTTTTTWACTTTTTB	9.71e-13	6.58e-10	1.18e-06	678	2661	2661	2661	39.5	113	4.25	31	1.16
MA0386.1	SPT15	VHHTAGNWATATATATWSVHN	4.14e-12	7.11e-10	1.27e-06	172	2661	2661	2661	1.44	117	4.4	35	1.32
MA0398.1	SUM1	AWWATTTTT	8.37e-13	7.49e-10	1.34e-06	895	2661	2661	2661	1.02	544	20.44	351	13.19
MA0940.1	AP1	MYAAAAAWRGAAA	8.11e-13	8.5e-10	1.52e-06	1048	2661	2661	2661	2.61	405	15.22	237	8.91
MA0079.3	SP1	GCCCCKCCCCC	6.68e-13	9.05e-10	1.62e-06	1355	2661	2661	2661	2.92	533	20.03	341	12.81
MA0240.1	repo	TTAATTA	2.69e-12	9.17e-10	1.64e-06	341	2661	2661	2661	7.12	92	3.46	21	0.79
MA0613.1	FOXG1	RTAAACAW	4.62e-12	9.92e-10	1.78e-06	215	2661	2661	2661	5.27	142	5.34	50	1.88
UP00263_1	Hoxb8_3780.2	HSBDGYAATTAATARW	2.48e-12	1.02e-09	1.82e-06	409	2661	2661	2661	1.14	260	9.77	129	4.85
UP00169_1	Lmx1b_3433.2	VDWWWTTAATTAATWHB	4.18e-12	1.04e-09	1.87e-06	250	2661	2661	2661	2.21	129	4.85	42	1.58
MA0909.1	HOXD13	CYMATAAAAH	2.1e-12	1.09e-09	1.96e-06	520	2661	2661	2661	1.06	330	12.4	181	6.8
UP00074_1	Isgf3g_primary	NDRAAWCGAAACTDA	2.46e-12	1.19e-09	2.12e-06	482	2661	2661	2661	1.63	235	8.83	111	4.17
MA1250.1	AT1G75490	CCDCCDCCACCGCCD	2.82e-12	1.35e-09	2.41e-06	477	2661	2661	2661	4.16	167	6.28	65	2.44
MA0990.1	EDT1	HAWTWAATGC	2.16e-12	1.94e-09	3.47e-06	898	2661	2661	2661	2.04	326	12.25	178	6.69
MA1152.1	SOX15	CYWTTGTTHW	1.34e-12	2.01e-09	3.59e-06	1498	2661	2661	2661	3.1	438	16.46	265	9.96
MA0174.1	Dbx	TTWATKA	2.38e-12	2.23e-09	3.98e-06	936	2661	2661	2661	1.96	349	13.12	196	7.37
MA0517.1	STAT1::STAT2	THAGTTTCRKTTTCY	4.95e-12	2.41e-09	4.32e-06	487	2661	2661	2661	1.12	314	11.8	171	6.43
UP00023_2	Sox30_secondary	TMNBATTATAATMCGV	5.86e-12	2.65e-09	4.74e-06	452	2661	2661	2661	1.12	283	10.64	148	5.56
MA1159.1	SGR5	AAAAWAAGACAAAAW	6.82e-12	2.82e-09	5.05e-06	414	2661	2661	2661	1.25	265	9.96	135	5.07
MA1100.1	ASCL1	VSAGCAGCTGSNN	2.17e-12	2.84e-09	5.09e-06	1310	2661	2661	2661	1.44	644	24.2	440	16.54
MA1221.1	RAP26	TKGCGGCGGMGGHGG	8.95e-12	2.85e-09	5.09e-06	318	2661	2661	2661	16.5	64	2.41	9	0.34
MA1000.2	ERF105	RHRRYGGCGGCGGHG	1.13e-11	3.04e-09	5.44e-06	268	2661	2661	2661	13.9	77	2.89	15	0.56
MA0892.1	GSX1	NCYMATTAVN	3.71e-12	3.5e-09	6.26e-06	942	2661	2661	2661	2.31	192	7.22	82	3.08
MA0893.1	GSX2	NSYMATTARH	3.58e-12	3.62e-09	6.49e-06	1013	2661	2661	2661	1.21	507	19.05	325	12.21
MA0707.1	MNX1	DNYAATTAAA	4.86e-12	3.64e-09	6.51e-06	748	2661	2661	2661	4.6	132	4.96	44	1.65
MA0191.1	HGTX	TTAATTA	6.59e-12	3.64e-09	6.52e-06	553	2661	2661	2661	6.77	96	3.61	24	0.9
MA1246.1	LEP	DCCKCCGCCGYCDMHDCCKCC	1.18e-11	3.96e-09	7.1e-06	337	2661	2661	2661	62.9	56	2.1	6	0.23
MA1222.1	AT1G44830	CCDCCDCCACCGMCA	1.38e-11	5.24e-09	9.38e-06	380	2661	2661	2661	2.51	178	6.69	75	2.82
MA1278.1	OBP1	HHYYTTYTTTTTTWVCTTTTT	6.38e-12	6.05e-09	1.08e-05	948	2661	2661	2661	3.47	376	14.13	220	8.27
UP00218_1	Dbx2_3487.1	BDNHATTAATTAWTWH	1.1e-11	6.63e-09	1.19e-05	603	2661	2661	2661	1.06	379	14.24	224	8.42
MA0030.1	FOXF2	BNAASGTAAACAAD	3.37e-11	7.52e-09	1.35e-05	223	2661	2661	2661	1.08	159	5.98	64	2.41
UP00051_1	Sox8_primary	NDATBWATTGTTHWDWW	9.03e-12	7.68e-09	1.38e-05	851	2661	2661	2661	1.2	484	18.19	309	11.61
MA0195.1	Lim3	YTAATTA	9.5e-12	7.74e-09	1.39e-05	815	2661	2661	2661	2.61	182	6.84	77	2.89
MA0675.1	NKX6-2	NYMATTAA	8.95e-12	7.99e-09	1.43e-05	893	2661	2661	2661	6.04	64	2.41	9	0.34
MA0902.1	HOXB2	NNTMATTANN	9.55e-12	8.12e-09	1.45e-05	850	2661	2661	2661	2.58	176	6.61	73	2.74
MA1228.1	AT4G18450	RYGGCGGCGGHGGHGGH	3.27e-11	8.7e-09	1.56e-05	266	2661	2661	2661	12.1	87	3.27	21	0.79
MA0516.1	SP2	GYCCCGCCYCYBSSS	7.66e-12	9.35e-09	1.67e-05	1220	2661	2661	2661	1.7	584	21.95	393	14.77
MA1231.1	ERF15	CDCCDCCGCCGCCRY	2.99e-11	1.14e-08	2.04e-05	382	2661	2661	2661	11.2	91	3.42	23	0.86
MA0515.1	Sox6	CCWTTGTYYY	1.45e-11	1.17e-08	2.1e-05	810	2661	2661	2661	2.03	414	15.56	253	9.51
MA1247.1	AT1G28160	YGRCGGCGGMGRHGG	4.47e-11	1.17e-08	2.1e-05	262	2661	2661	2661	13.1	68	2.56	12	0.45
UP00196_1	Hoxa4_3426.1	DDTTATTAATTAACKBG	5.35e-11	1.22e-08	2.18e-05	228	2661	2661	2661	3.59	86	3.23	21	0.79
MA0764.1	ETV4	ACCGGAAGTR	1.89e-11	1.3e-08	2.32e-05	686	2661	2661	2661	1.02	424	15.93	262	9.85
MA0047.2	Foxa2	TGTTTACWYWGB	2.39e-11	1.31e-08	2.34e-05	547	2661	2661	2661	1.09	342	12.85	197	7.4
MA0621.1	mix-a	NDTTAATTAGN	8.21e-11	1.52e-08	2.72e-05	185	2661	2661	2661	1.5	122	4.58	42	1.58
MA0178.1	CG32105	TTAATTA	3.33e-11	1.7e-08	3.05e-05	511	2661	2661	2661	4.8	100	3.76	28	1.05
UP00242_1	Hoxc8_3429.2	NWDDRGTAATTAHYKT	4.4e-11	1.71e-08	3.06e-05	389	2661	2661	2661	1.21	229	8.61	113	4.25
UP00101_1	Sox12_primary	THATTGTTMTNAWN	2.16e-11	1.94e-08	3.47e-05	897	2661	2661	2661	1.11	522	19.62	344	12.93
UP00129_1	Pou3f1_3819.1	DVNTAATTAATTAABTN	6.99e-11	2.06e-08	3.69e-05	295	2661	2661	2661	1.14	201	7.55	94	3.53
MA0614.1	Foxj2	RTAAACAA	2.48e-11	2.08e-08	3.72e-05	838	2661	2661	2661	3.75	250	9.39	127	4.77
UP00206_1	Hoxb7_3953.1	SBABTAATTAMTGNHR	6.25e-11	2.16e-08	3.87e-05	346	2661	2661	2661	2.84	121	4.55	41	1.54
MA1252.1	PUCHI	CCDCCKCCGCCGYYD	9.1e-11	2.48e-08	4.43e-05	272	2661	2661	2661	8.93	83	3.12	20	0.75
UP00200_1	Nkx6-1_2825.1	GVWAATTAATTAMYBBG	8.95e-11	2.59e-08	4.64e-05	290	2661	2661	2661	1.09	196	7.37	91	3.42
MA0098.3	ETS1	ACCGGAARTR	4.65e-11	2.69e-08	4.81e-05	577	2661	2661	2661	1.03	361	13.57	214	8.04
MA0257.1	zen2	YTAATKA	5.69e-11	2.99e-08	5.35e-05	526	2661	2661	2661	8.66	76	2.86	16	0.6
MA1256.1	RAP212	NGRHDRHDRYGGCGGCGGHGR	1.26e-10	3.36e-08	6.02e-05	267	2661	2661	2661	98.6	37	1.39	1	0.04
MA0685.1	SP4	BWRGCCACGCCCMCTYH	2.53e-10	3.37e-08	6.03e-05	133	2661	2661	2661	3.12	79	2.97	19	0.71
MA0848.1	FOXO4	GTAAACA	3.95e-11	3.44e-08	6.17e-05	873	2661	2661	2661	9.25	96	3.61	26	0.98
MA0236.1	otp	YTAATTA	6.78e-11	4.14e-08	7.41e-05	611	2661	2661	2661	4.87	109	4.1	34	1.28
MA0332.1	MET28	CTGTGG	2.43e-11	4.24e-08	7.58e-05	1744	2661	2661	2661	7.55	376	14.13	224	8.42
MA0217.1	caup	TAACA	2.3e-11	4.45e-08	7.97e-05	1936	2661	2661	2661	1.19	911	34.24	690	25.93
UP00096_1	Sox13_primary	WYWRGAACAATWWWTW	6.37e-11	4.47e-08	8e-05	702	2661	2661	2661	1.38	381	14.32	231	8.68
MA1242.1	AT3G57600	CCDCCACCGCC	1.1e-10	4.78e-08	8.56e-05	436	2661	2661	2661	9.64	113	4.25	37	1.39
MA0170.1	C15	TTAAWKR	5.26e-11	5.09e-08	9.11e-05	968	2661	2661	2661	6.61	72	2.71	14	0.53
MA1244.1	ABR1	GRHGRHDDTKGCGGCGGMG	1.8e-10	5.2e-08	9.3e-05	289	2661	2661	2661	70.2	40	1.5	2	0.08
MA0879.1	Dlx1	NVTAATTANN	6.04e-11	5.42e-08	9.71e-05	897	2661	2661	2661	3.21	165	6.2	69	2.59
MA0082.1	squamosa	MCAWAWATRGWAAN	8.72e-11	5.47e-08	9.78e-05	627	2661	2661	2661	1.39	341	12.81	200	7.52
MA1277.1	Adof1	AAAAAVAAAAAGTARAAAAWR	7.83e-11	6.38e-08	0.000114	815	2661	2661	2661	5.77	273	10.26	147	5.52
MA0457.1	PHDP	HTAATTD	9.52e-11	6.53e-08	0.000117	686	2661	2661	2661	5.38	120	4.51	41	1.54
MA1173.1	MYB101	AAMHNTAACCGAAWH	1.26e-10	8.18e-08	0.000146	647	2661	2661	2661	1.05	398	14.96	247	9.28
MA0052.3	MEF2A	KCTAWAAATAGM	7.73e-10	8.66e-08	0.000155	112	2661	2661	2661	1.16	86	3.23	24	0.9
MA0624.1	NFATC1	WWTTTCCRHN	5.68e-11	8.66e-08	0.000155	1526	2661	2661	2661	1.03	864	32.47	651	24.46
MA0558.1	FLC	WNWWDCCMAAAATRGAAAGWW	2.05e-10	9.76e-08	0.000175	476	2661	2661	2661	1.57	271	10.18	148	5.56
MA0650.1	HOXA13	CYAATAAAAM	1.7e-10	1.01e-07	0.000182	598	2661	2661	2661	1.22	341	12.81	202	7.59
MA0702.1	LMX1A	YTAATTAA	1.45e-10	1.05e-07	0.000189	728	2661	2661	2661	2.68	186	6.99	85	3.19
MA0474.2	ERG	ACCGGAARTV	1.94e-10	1.12e-07	0.0002	576	2661	2661	2661	1.03	358	13.45	216	8.12
UP00093_1	Klf7_primary	TNRRCCMCGCCCHYHD	1.54e-10	1.25e-07	0.000223	811	2661	2661	2661	1.37	424	15.93	269	10.11
MA0538.1	daf-12	GWGYGYGTGTGYGTB	1.17e-10	1.25e-07	0.000223	1065	2661	2661	2661	2.92	531	19.95	358	13.45
UP00238_1	Nkx6-3_3446.1	GVNWATTAATTAVTBNK	3.42e-10	1.32e-07	0.000237	386	2661	2661	2661	3.21	136	5.11	53	1.99
UP00144_1	Hoxb4_2627.1	CNNRTTAATTAATWAHY	4.43e-10	1.35e-07	0.000242	305	2661	2661	2661	3.31	103	3.87	33	1.24
MA0182.1	CG4328-RA	WTWATTR	1.57e-10	1.35e-07	0.000242	863	2661	2661	2661	3.31	180	6.76	81	3.04
MA0226.1	hbn	TTAATTR	3.16e-10	1.5e-07	0.000268	473	2661	2661	2661	12.2	60	2.25	10	0.38
UP00086_1	Irf3_primary	NARAAHSGAAACYR	1.65e-10	1.62e-07	0.000289	977	2661	2661	2661	1.04	577	21.68	399	14.99
MA0206.1	abd-A	TTAATKA	2.69e-10	1.63e-07	0.000291	605	2661	2661	2661	1.13	348	13.08	209	7.85
UP00197_1	Hoxc9_2367.2	NDVGGTCATTAAHYDB	3.87e-10	1.65e-07	0.000296	427	2661	2661	2661	1.06	274	10.3	152	5.71
MA1330.1	ATHB24	AAWHRTAATTAAKDW	6.46e-10	1.69e-07	0.000302	261	2661	2661	2661	1.73	142	5.34	58	2.18
MA0903.1	HOXB3	NNYMATTARN	2.87e-10	2.41e-07	0.000431	840	2661	2661	2661	4.27	104	3.91	33	1.24
MA1371.1	IDD4	MASAAAAMGACAAAAAW	1.13e-09	2.77e-07	0.000495	244	2661	2661	2661	1.88	145	5.45	61	2.29
MA0011.1	br(var.2)	TWCTATTT	3.13e-10	2.81e-07	0.000503	897	2661	2661	2661	2.71	188	7.07	88	3.31
MA1245.1	AT2G33710	CCDCCGCCGCCGYCR	9.79e-10	2.89e-07	0.000517	295	2661	2661	2661	9.81	80	3.01	21	0.79
MA0628.1	POU6F1	AYTAATTART	7.37e-10	2.9e-07	0.000519	393	2661	2661	2661	2.66	134	5.04	53	1.99
MA0722.1	VAX1	YTAATTAH	3.41e-10	2.92e-07	0.000523	856	2661	2661	2661	3.49	112	4.21	38	1.43
MA0127.1	PEND	AYTTCTTATK	3.24e-10	3.14e-07	0.000563	971	2661	2661	2661	1.05	560	21.04	387	14.54
UP00134_1	Hoxb13_3479.1	VRNCCAATAAAAWHHV	6.15e-10	3.35e-07	0.000599	544	2661	2661	2661	1.41	293	11.01	168	6.31
MA0704.1	Lhx4	YTAATTAR	5.03e-10	3.54e-07	0.000634	704	2661	2661	2661	3.46	135	5.07	53	1.99
MA0446.1	fkh	TGTTTRYHYAA	5.04e-10	3.73e-07	0.000668	741	2661	2661	2661	1.26	419	15.75	269	10.11
MA0189.1	E5	YTAATKA	5.98e-10	4.22e-07	0.000756	706	2661	2661	2661	4.7	122	4.58	45	1.69
MA0042.2	FOXI1	GTAAACA	7.44e-10	4.27e-07	0.000765	574	2661	2661	2661	2.72	198	7.44	97	3.65
MA0674.1	NKX6-1	NTMATTAA	6.78e-10	4.33e-07	0.000776	639	2661	2661	2661	4.6	128	4.81	49	1.84
MA0251.1	unpg	YTAATTR	1.05e-09	4.7e-07	0.00084	447	2661	2661	2661	6.25	101	3.8	33	1.24
UP00113_1	Hoxc4_3491.1	CRMRTTAATTAABNAHN	2.1e-09	5.43e-07	0.000972	259	2661	2661	2661	2.52	106	3.98	37	1.39
UP00091_2	Sox5_secondary	NHDCATMATTDASNN	4.28e-10	5.47e-07	0.000979	1278	2661	2661	2661	1.04	716	26.91	526	19.77
MA1373.1	IDD2	HABWAAACGACAAAA	2.22e-09	5.58e-07	0.000999	251	2661	2661	2661	1.65	152	5.71	67	2.52
UP00034_1	Sox7_primary	HNKDWWDAACAATARWNNTHNW	7.78e-10	5.65e-07	0.00101	726	2661	2661	2661	3	265	9.96	147	5.52
MA1365.1	AT5G47660	WWHHWTTTTTACYGY	1.6e-09	5.75e-07	0.00103	358	2661	2661	2661	5.05	105	3.95	36	1.35
UP00262_1	Lhx1_2240.2	VGWATTAATTAAWWAHB	2.33e-09	6.11e-07	0.00109	262	2661	2661	2661	5.48	80	3.01	22	0.83
MA0179.1	CG32532	TTAATTR	1.21e-09	6.11e-07	0.00109	503	2661	2661	2661	10.2	66	2.48	14	0.53
UP00133_1	Cdx2_4272.1	DVVGGYMATAAAAYKH	2e-09	6.69e-07	0.0012	335	2661	2661	2661	1.12	214	8.04	111	4.17
MA0151.1	Arid3a	ATYAAA	7.03e-10	7.22e-07	0.00129	1028	2661	2661	2661	6.43	120	4.51	44	1.65
MA0928.1	zfh-2	NVTTAATTAGN	4.27e-09	7.86e-07	0.00141	184	2661	2661	2661	2.68	101	3.8	35	1.32
MA0224.1	exex	BTAATTA	2.71e-09	8.3e-07	0.00149	306	2661	2661	2661	3.11	107	4.02	38	1.43
MA0220.1	en	YTAATTR	1.92e-09	8.35e-07	0.00149	436	2661	2661	2661	11	61	2.29	12	0.45
MA0706.1	MEOX2	DSTAATTAWN	1.04e-09	8.85e-07	0.00158	848	2661	2661	2661	3.22	130	4.89	51	1.92
MA0277.1	AZF1	AAAAAGAAA	6.72e-10	9.14e-07	0.00164	1361	2661	2661	2661	1.11	748	28.11	557	20.93
MA1116.1	RBPJ	BVTGGGAANN	8.5e-10	9.54e-07	0.00171	1123	2661	2661	2661	1.8	608	22.85	433	16.27
UP00240_1	Cdx1_2245.1	WDVGGTMATAAAAYKH	2.37e-09	9.66e-07	0.00173	408	2661	2661	2661	1.07	261	9.81	147	5.52
MA1279.1	COG1	RWAAAAADDAAAAAGTRAAAA	1.45e-09	1.04e-06	0.00185	715	2661	2661	2661	1.25	430	16.16	282	10.6
MA1049.1	ERF094	MGCCGCCR	1.23e-09	1.06e-06	0.00189	861	2661	2661	2661	14.1	85	3.19	24	0.9
MA1367.1	AT1G76870	AWHHWAAACCRSWW	1.7e-09	1.07e-06	0.00192	631	2661	2661	2661	1.71	312	11.72	186	6.99
MA0900.1	HOXA2	NSTMATTAVS	1.53e-09	1.14e-06	0.00204	744	2661	2661	2661	2.18	186	6.99	90	3.38
MA0285.1	CRZ1	CNVMGCCHC	4.46e-10	1.17e-06	0.00209	2623	2661	2661	2661	2.51	570	21.42	397	14.92
MA0245.1	slou	TTAATTR	1.8e-09	1.18e-06	0.00212	659	2661	2661	2661	8.37	59	2.22	11	0.41
UP00038_1	Spdef_primary	VHRCATCCGGATHYTY	3.37e-09	1.38e-06	0.00247	409	2661	2661	2661	1.06	261	9.81	148	5.56
MA0232.1	lbl	TAATKA	1.95e-09	1.39e-06	0.00249	714	2661	2661	2661	4.74	84	3.16	24	0.9
MA0184.1	CG9876	YTAATTA	3.43e-09	1.59e-06	0.00284	462	2661	2661	2661	4.91	116	4.36	44	1.65
MA1366.1	AT1G76880	AYRGTAAAAAWDDWWW	4.78e-09	1.7e-06	0.00305	356	2661	2661	2661	6.55	89	3.34	28	1.05
MA0606.1	NFAT5	NTTTTCCAYN	1.25e-09	1.71e-06	0.00307	1371	2661	2661	2661	1.11	748	28.11	560	21.04
MA0687.1	SPIC	HAAAAGVGGAAGTA	2.87e-09	1.75e-06	0.00313	609	2661	2661	2661	1.19	357	13.42	224	8.42
MA0230.1	lab	TTAATKA	4.43e-09	1.81e-06	0.00323	408	2661	2661	2661	1.02	260	9.77	148	5.56
MA1328.1	ATHB34	WTWAWHNVYTAATYA	6.69e-09	1.85e-06	0.00331	277	2661	2661	2661	1.41	166	6.24	79	2.97
MA0231.1	lbe	TAAYYA	2.16e-09	1.89e-06	0.00339	876	2661	2661	2661	2.84	125	4.7	49	1.84
MA0849.1	FOXO6	GTAAACA	3.7e-09	2.25e-06	0.00402	608	2661	2661	2661	5	152	5.71	68	2.56
MA0194.1	Lim1	TTAATTA	1.34e-08	2.3e-06	0.00411	172	2661	2661	2661	2.31	90	3.38	30	1.13
MA0881.1	Dlx4	VYAATTAN	3.68e-09	2.41e-06	0.00431	654	2661	2661	2661	4.33	103	3.87	36	1.35
MA0662.1	MIXL1	NBYAATTAVN	3.08e-09	2.59e-06	0.00463	841	2661	2661	2661	5.07	83	3.12	24	0.9
MA1374.1	IDD7	HASAAAACGACAAAAAWW	1.34e-08	2.86e-06	0.00512	214	2661	2661	2661	1.34	141	5.3	63	2.37
UP00130_1	Lhx3_3431.1	VNAATTAATTAAWWHHB	1.48e-08	2.97e-06	0.00531	201	2661	2661	2661	4.22	76	2.86	22	0.83
MA0716.1	PRRX1	YYAATTAR	4.37e-09	2.99e-06	0.00535	684	2661	2661	2661	6.31	75	2.82	20	0.75
UP00172_1	Prop1_3949.1	VGVRTTAATTAAKWNNC	1.51e-08	3.06e-06	0.00548	203	2661	2661	2661	4.14	63	2.37	15	0.56
MA0919.1	dsc-1	NYTAATTARN	5.9e-09	3.99e-06	0.00714	676	2661	2661	2661	5.59	78	2.93	22	0.83
MA0885.1	Dlx2	VYAATTAN	8.35e-09	4.09e-06	0.00733	490	2661	2661	2661	5.15	109	4.1	41	1.54
MA0241.1	ro	YTAATTA	9.85e-09	4.12e-06	0.00737	418	2661	2661	2661	4.3	107	4.02	40	1.5
MA0762.1	ETV2	AACCGGAAATR	1.53e-08	4.43e-06	0.00793	290	2661	2661	2661	1.05	191	7.18	99	3.72
MA1270.1	AT3G45610	KTWACTTTTTNNYTTTTTT	6.45e-09	4.65e-06	0.00832	721	2661	2661	2661	53.8	76	2.86	21	0.79
MA0031.1	FOXD1	GTAAACAW	8.31e-09	4.98e-06	0.00891	599	2661	2661	2661	3.29	135	5.07	58	2.18
MA0644.1	ESX1	NYYAATTAVM	6.63e-09	5.09e-06	0.00912	769	2661	2661	2661	3.92	108	4.06	40	1.5
MA0075.2	Prrx2	YYAATTAN	6.45e-09	5.21e-06	0.00932	808	2661	2661	2661	4.62	76	2.86	21	0.79
MA1027.1	KAN1	RNWTATTC	4.91e-09	5.39e-06	0.00965	1098	2661	2661	2661	1.01	634	23.83	464	17.44
MA0723.1	VAX2	YTAATTAB	7.08e-09	5.6e-06	0.01	791	2661	2661	2661	3.6	111	4.17	42	1.58
MA0886.1	EMX2	VBTAATTARB	1.2e-08	5.63e-06	0.0101	469	2661	2661	2661	3.04	131	4.92	56	2.1
MA0200.1	Pph13	HTAATTA	1.33e-08	5.98e-06	0.0107	449	2661	2661	2661	8.41	78	2.93	23	0.86
MA0645.1	ETV6	MSCGGAAGTR	8.66e-09	6e-06	0.0107	693	2661	2661	2661	1.02	416	15.63	277	10.41
MA0214.1	bsh	TTAATKR	9.35e-09	6.51e-06	0.0116	696	2661	2661	2661	6.97	62	2.33	14	0.53
MA0882.1	DLX6	VYAATTAN	1.14e-08	6.67e-06	0.0119	585	2661	2661	2661	5.54	87	3.27	28	1.05
MA0132.2	PDX1	VYAATTAR	1.05e-08	6.83e-06	0.0122	653	2661	2661	2661	4.89	110	4.13	42	1.58
MA1232.1	AT4G28140	GDCGGYGGHGRHGRHGGNGR	1.39e-08	6.87e-06	0.0123	495	2661	2661	2661	51.8	39	1.47	4	0.15
MA0710.1	NOTO	NYTAATTAVN	1.09e-08	6.97e-06	0.0125	638	2661	2661	2661	3.46	156	5.86	73	2.74
MA0433.1	YOX1	TTAATTAA	1.55e-08	7.09e-06	0.0127	459	2661	2661	2661	11.7	61	2.29	14	0.53
MA0625.1	NFATC3	WTTTTCCRYH	5.54e-09	7.38e-06	0.0132	1331	2661	2661	2661	1.17	678	25.48	504	18.94
UP00074_2	Isgf3g_secondary	GVAAAACABDACYD	3.77e-09	7.4e-06	0.0132	1963	2661	2661	2661	1.13	959	36.04	761	28.6
MA0923.1	lim-4	NSTAATTAR	1.25e-08	7.48e-06	0.0134	597	2661	2661	2661	4.95	100	3.76	36	1.35
MA1123.1	TWIST1	NNDCCAGATGTBN	7.18e-09	7.54e-06	0.0135	1050	2661	2661	2661	1.87	393	14.77	257	9.66
MA0135.1	Lhx3	WAATTAATTAWYY	5.24e-08	7.6e-06	0.0136	145	2661	2661	2661	1.29	98	3.68	37	1.39
UP00016_1	Sry_primary	NHNWATTATAATRWDN	3.26e-08	7.89e-06	0.0141	242	2661	2661	2661	1.34	147	5.52	69	2.59
MA0181.1	Vsx1	YTAATTA	1.42e-08	8.19e-06	0.0147	576	2661	2661	2661	12.3	53	1.99	10	0.38
MA0094.2	Ubx	YTTAATTA	1.51e-08	8.25e-06	0.0148	547	2661	2661	2661	12.9	63	2.37	15	0.56
MA0304.1	GCR1	TGGAAGCC	7.23e-09	8.69e-06	0.0155	1201	2661	2661	2661	1.09	671	25.22	499	18.75
MA0784.1	POU1F1	AWTATGCWAATKAG	3.14e-08	8.74e-06	0.0156	278	2661	2661	2661	1.17	175	6.58	89	3.34
UP00064_1	Sox18_primary	YWBHATTGTTNTMWHH	1.12e-08	1.04e-05	0.0186	924	2661	2661	2661	1.29	470	17.66	324	12.18
MA0177.1	CG18599	YTAATKA	2.45e-08	1.04e-05	0.0187	426	2661	2661	2661	4.92	129	4.85	56	2.1
MA0156.2	FEV	ACCGGAAGTN	2e-08	1.07e-05	0.0192	536	2661	2661	2661	1.03	328	12.33	207	7.78
MA0612.1	EMX1	VYTAATKASB	1.51e-08	1.08e-05	0.0193	715	2661	2661	2661	2.96	145	5.45	66	2.48
MA0157.2	FOXO3	GTAAACAW	2.87e-08	1.11e-05	0.0198	386	2661	2661	2661	1.08	235	8.83	134	5.04
UP00142_1	Uncx4.1_2281.2	VNTAATTAATTAABGSG	6.96e-08	1.18e-05	0.0212	170	2661	2661	2661	5.18	50	1.88	10	0.38
MA0208.1	al	TAATTAA	6.19e-08	1.24e-05	0.0223	201	2661	2661	2661	12.3	62	2.33	16	0.6
MA1248.1	DREB26	YCNCCDYCDYCDCCACCGMC	3.83e-08	1.33e-05	0.0238	347	2661	2661	2661	18.4	63	2.37	16	0.6
MA0444.1	CG34031	TTAATTG	2.4e-08	1.37e-05	0.0245	569	2661	2661	2661	1.11	326	12.25	206	7.74
MA1034.1	Os05g0497200	CGSCGCCR	8.91e-08	1.44e-05	0.0258	162	2661	2661	2661	27.5	72	2.71	22	0.83
UP00234_1	Msx1_3031.2	NRMHAYTAATTAATNH	4.05e-08	1.46e-05	0.0261	360	2661	2661	2661	5.64	89	3.34	31	1.16
UP00237_1	Otp_3496.1	VVYWRTTAATTAAYDNG	1.27e-07	1.48e-05	0.0265	117	2661	2661	2661	1.47	78	2.93	26	0.98
UP00149_1	Phox2b_3948.1	VVNAATTAATTAABDNG	9.27e-08	1.6e-05	0.0287	173	2661	2661	2661	3.17	63	2.37	17	0.64
MA1385.1	AT2G40260	TWWWAAHATTCTYTT	3.44e-08	1.61e-05	0.0289	469	2661	2661	2661	1.15	280	10.52	170	6.39
MA0172.1	CG11294	TTAATTA	7.8e-08	1.72e-05	0.0307	220	2661	2661	2661	11.1	67	2.52	19	0.71
MA1004.1	ERF13	SGCCGCCR	2.25e-08	1.9e-05	0.034	845	2661	2661	2661	17.1	50	1.88	9	0.34
MA1329.1	ATHB25	THAYTAATTAHNHWW	7.92e-08	1.91e-05	0.0341	241	2661	2661	2661	1.7	130	4.89	59	2.22
MA0630.1	SHOX	HTAATTRR	2.55e-08	1.94e-05	0.0347	761	2661	2661	2661	6.38	60	2.25	14	0.53
UP00059_2	Arid5a_secondary	NNYNMAATACGADWBVA	3.26e-08	2.21e-05	0.0396	678	2661	2661	2661	1.04	398	14.96	267	10.03
MA0518.1	Stat4	YTTCYRGGAARNVR	3.69e-08	2.28e-05	0.0409	619	2661	2661	2661	1.84	307	11.54	192	7.22
UP00212_1	Lhx5_2279.1	VNAATTAATTAAAWHHY	1.04e-07	2.31e-05	0.0414	222	2661	2661	2661	12.5	45	1.69	8	0.3
UP00085_2	Sfpi1_secondary	HHAWTTMVGGAACC	1.75e-08	2.36e-05	0.0423	1351	2661	2661	2661	1.1	707	26.57	536	20.14
MA1369.1	HDG1	RYAATTAATGM	1.08e-07	2.38e-05	0.0427	221	2661	2661	2661	3.16	93	3.49	35	1.32
MA0880.1	Dlx3	NYAATTAN	3.51e-08	2.46e-05	0.044	701	2661	2661	2661	4.58	81	3.04	26	0.98
MA0559.1	PI	CCAAAARWRGAAAR	2.72e-08	2.57e-05	0.0461	945	2661	2661	2661	2.2	381	14.32	252	9.47
MA0927.1	vab-7	CTAATTAA	4.81e-08	2.57e-05	0.0461	535	2661	2661	2661	3.53	130	4.89	58	2.18
UP00200_2	Nkx6-1_2825.2	VVTWATTAATTABBYC	9.62e-08	2.8e-05	0.0501	291	2661	2661	2661	1.28	174	6.54	91	3.42
MA1254.1	ERF13	MKCMGCCGCCATWDY	1.14e-07	3.06e-05	0.0547	269	2661	2661	2661	113	23	0.86	0	0
MA0721.1	UNCX	YYAATTAV	3.99e-08	3.2e-05	0.0572	801	2661	2661	2661	4.93	79	2.97	25	0.94
MA1375.1	ANL2	GCATTAATTRY	1.8e-07	3.39e-05	0.0608	189	2661	2661	2661	1.08	129	4.85	60	2.25
MA0924.1	pal-1	GTAATWAA	1.17e-07	3.57e-05	0.0639	304	2661	2661	2661	17.9	49	1.84	10	0.38
UP00128_1	Pou3f2_2824.1	SNWAATTAATTARKDND	1.56e-07	4.11e-05	0.0736	263	2661	2661	2661	1.1	171	6.43	90	3.38
MA0167.1	Awh	YTAATTA	7.18e-08	4.42e-05	0.0792	616	2661	2661	2661	2.92	146	5.49	70	2.63
MA0225.1	ftz	TTAATKA	8.91e-08	4.52e-05	0.0808	507	2661	2661	2661	11.8	72	2.71	22	0.83
MA1219.1	CEJ1	CCDYCDCCACCGMCA	1.19e-07	5.65e-05	0.101	474	2661	2661	2661	8.17	99	3.72	39	1.47
MA0202.1	Rx	YTAATTR	1.75e-07	5.76e-05	0.103	330	2661	2661	2661	11.2	67	2.52	20	0.75
MA0772.1	IRF7	HCGAAARYGAAAVT	3.16e-07	5.79e-05	0.104	183	2661	2661	2661	1.13	123	4.62	57	2.14
UP00224_1	Pax6_3838.3	TRAYTAATTARTKNDM	1.45e-07	6.11e-05	0.109	420	2661	2661	2661	1.48	225	8.46	131	4.92
MA0260.1	che-1	GAARCC	3.19e-08	6.13e-05	0.11	1925	2661	2661	2661	1.03	1047	39.35	857	32.21
MA0717.1	RAX2	YYAATTAV	7.91e-08	6.23e-05	0.111	787	2661	2661	2661	5	74	2.78	23	0.86
MA0334.1	MET32	MGCCACA	2.9e-08	6.55e-05	0.117	2263	2661	2661	2661	2.22	611	22.96	452	16.99
UP00014_1	Sox17_primary	MDAAACAATTRAWHW	8.58e-08	6.73e-05	0.121	785	2661	2661	2661	1.11	446	16.76	312	11.72
MA0520.1	Stat6	BDBTTCCWSAGAAVY	1.74e-07	6.83e-05	0.122	393	2661	2661	2661	11	98	3.68	39	1.47
MA1415.1	REF6	RAAACAGAGNA	9.62e-08	6.93e-05	0.124	720	2661	2661	2661	1.06	421	15.82	291	10.94
UP00059_1	Arid5a_primary	SYAATATTGVDANH	1.38e-07	7.2e-05	0.129	521	2661	2661	2661	2.14	198	7.44	110	4.13
MA1208.1	GT2	WTTTTTACCGYHDT	1.58e-07	7.6e-05	0.136	481	2661	2661	2661	1.24	270	10.15	167	6.28
MA1200.1	AGL25	WCTTTCCWTWTTTGGAAA	1.92e-07	7.88e-05	0.141	411	2661	2661	2661	1.18	253	9.51	154	5.79
MA0786.1	POU3F1	WTATGCWAATKW	1.59e-07	7.9e-05	0.141	497	2661	2661	2661	1.52	250	9.39	151	5.67
MA0238.1	pb	YTAATKA	2.15e-07	8.01e-05	0.143	373	2661	2661	2661	12.2	63	2.37	18	0.68
MA0215.1	btn	TTAATKA	1.58e-07	8.22e-05	0.147	520	2661	2661	2661	3.1	183	6.88	99	3.72
MA0701.1	LHX9	BYAATTAR	9.98e-08	8.36e-05	0.15	837	2661	2661	2661	5.66	70	2.63	21	0.79
MA1184.1	RVE1	HHVWAAATATCTWH	5.3e-07	8.59e-05	0.154	162	2661	2661	2661	6.65	50	1.88	12	0.45
MA0761.1	ETV1	ACCGGAAGTD	1.44e-07	8.66e-05	0.155	600	2661	2661	2661	1.17	323	12.14	210	7.89
MA0219.1	ems	YTAATKA	1.08e-07	8.85e-05	0.159	821	2661	2661	2661	5.54	93	3.49	35	1.32
MA1161.1	TSO1	WWTTWAAAATTTAAA	4.43e-07	8.9e-05	0.159	201	2661	2661	2661	2.06	106	3.98	46	1.73
UP00054_1	Tcf7_primary	KHWASATCAAAGGAAHH	9.41e-08	9.28e-05	0.166	987	2661	2661	2661	1.09	563	21.16	415	15.6
UP00209_2	Cart1_1275.1	BVMNTTAATTAAYYNNN	4.77e-07	9.93e-05	0.178	208	2661	2661	2661	5.26	54	2.03	14	0.53
UP00252_1	Hoxc5_2630.2	CGMRTTAATTAATWANN	3.51e-07	0.000105	0.189	300	2661	2661	2661	1.73	141	5.3	70	2.63
MA1273.1	dof4.2	AAADNAAAAAGGYAAAAAA	1.78e-07	0.00011	0.196	614	2661	2661	2661	24.1	101	3.8	41	1.54
MA0602.1	Arid5a	SYAATATTGVDANH	2.12e-07	0.000111	0.198	521	2661	2661	2661	3.51	144	5.41	71	2.67
MA1005.1	ERF3	CGCCGCCA	1.93e-07	0.000122	0.219	632	2661	2661	2661	30.1	32	1.2	3	0.11
MA0198.1	OdsH	YTAATTR	3.07e-07	0.000126	0.226	411	2661	2661	2661	6.01	110	4.13	48	1.8
MA0062.2	Gabpa	CCGGAAGTGVV	2.46e-07	0.000129	0.231	524	2661	2661	2661	1.33	278	10.45	175	6.58
UP00164_2	Hoxa7_3750.1	BBMKTAATTAMKRGHM	4.12e-07	0.00013	0.233	316	2661	2661	2661	1.75	146	5.49	74	2.78
MA1191.1	AT3G10113	HHHVAAAATATCTWA	1.07e-06	0.000139	0.248	129	2661	2661	2661	1.54	87	3.27	35	1.32
MA0683.1	POU4F2	RTGCATAATTAATGAG	2.25e-06	0.00014	0.25	62	2661	2661	2661	3.01	35	1.32	6	0.23
MA0176.1	CG15696-RA	TTAATTR	1.82e-07	0.00014	0.251	770	2661	2661	2661	8.84	56	2.1	14	0.53
MA1261.1	AT5G67000	HDDHTRCGGCKGHGG	2.06e-07	0.000141	0.252	683	2661	2661	2661	1.82	280	10.52	176	6.61
MA0180.1	Vsx2	KTTAATTAG	7.44e-07	0.000146	0.261	196	2661	2661	2661	6.91	62	2.33	19	0.71
MA1196.1	At5g05790	AWYCTTATCYTNWTH	4.1e-07	0.000163	0.292	398	2661	2661	2661	2.14	165	6.2	88	3.31
MA0634.1	ALX3	YYYAATTANV	1.96e-07	0.000164	0.294	835	2661	2661	2661	2.2	220	8.27	128	4.81
UP00085_1	Sfpi1_primary	NDAWGVGGAAGTDN	1.43e-07	0.000166	0.296	1161	2661	2661	2661	1.09	632	23.75	479	18
MA1182.1	At3g09600	AGATATTTTWDD	1.31e-06	0.000166	0.297	127	2661	2661	2661	1.16	88	3.31	36	1.35
MA1002.1	ERF112	SSCGCCGCCR	1.96e-07	0.000192	0.343	976	2661	2661	2661	12.4	52	1.95	12	0.45
UP00099_1	Ascl2_primary	NKYARCAGCTGCYVHHK	1.39e-07	0.000213	0.381	1528	2661	2661	2661	7.22	229	8.61	134	5.04
MA0660.1	MEF2B	RCTAWAAATAGC	4.12e-06	0.000214	0.383	52	2661	2661	2661	1.11	42	1.58	10	0.38
MA0816.1	Ascl2	ARCAGCTGCY	1.98e-07	0.000226	0.404	1141	2661	2661	2661	3.55	336	12.63	222	8.34
MA0187.1	Dll	TAATTRY	3.29e-07	0.000229	0.411	697	2661	2661	2661	3.69	130	4.89	62	2.33
MA0567.1	ERF1B	MGCCGCCA	4.08e-07	0.000244	0.436	597	2661	2661	2661	42.4	28	1.05	2	0.08
MA0725.1	VSX1	YTAATTAN	3.6e-07	0.000252	0.451	701	2661	2661	2661	4.9	82	3.08	30	1.13
MA0554.1	SOC1	WHTTTCCWTTTTTGG	5.99e-07	0.000282	0.505	471	2661	2661	2661	1.25	268	10.07	170	6.39
MA0718.1	RAX	RYYAATTARH	5.06e-07	0.000295	0.528	583	2661	2661	2661	10.2	52	1.95	13	0.49
UP00208_2	Obox5_3963.2	NWYAWTTAATCCCTBYB	1.62e-06	0.000312	0.558	193	2661	2661	2661	1.29	118	4.43	57	2.14
MA0166.1	Antp	TTAATKA	8.74e-07	0.000318	0.569	364	2661	2661	2661	1.6	165	6.2	90	3.38
MA0039.3	KLF4	MCACACCCTNN	2.02e-07	0.000352	0.63	1739	2661	2661	2661	2.2	663	24.92	509	19.13
MA1125.1	ZNF384	DNWMAAAAAAAA	5.93e-07	0.000361	0.646	609	2661	2661	2661	220	71	2.67	24	0.9
UP00247_1	Pax4_3989.2	WVRDYTAATTARYBSDN	1.89e-06	0.000368	0.658	195	2661	2661	2661	2.13	87	3.27	36	1.35
UP00063_1	Hoxa3_primary	NBGWGBTAATTARY	1.32e-06	0.000377	0.676	286	2661	2661	2661	3.98	91	3.42	38	1.43
MA0905.1	HOXC10	GTCRTAAAAH	9.8e-07	0.000382	0.684	390	2661	2661	2661	1.04	235	8.83	145	5.45
UP00026_2	Zscan4_secondary	HVHRGCACACAANHHN	2.43e-07	0.000385	0.689	1583	2661	2661	2661	1.46	761	28.6	600	22.55
MA0765.1	ETV5	ACCGGAWGYN	5.03e-07	0.000385	0.69	766	2661	2661	2661	1.02	446	16.76	320	12.03
MA0773.1	MEF2D	DCTAWAAATAGM	6.74e-06	0.000391	0.699	58	2661	2661	2661	1.57	41	1.54	10	0.38
MA0493.1	Klf1	RRCCACACCCW	4.06e-07	0.000403	0.721	993	2661	2661	2661	1.03	567	21.31	426	16.01
UP00075_1	Sox15_primary	WNNDGAACAATWRRNWT	4.79e-07	0.000412	0.738	861	2661	2661	2661	1.21	460	17.29	332	12.48
MA0146.2	Zfx	SSSGCCBVGGCCTS	3.91e-07	0.000417	0.746	1067	2661	2661	2661	4.8	276	10.37	175	6.58
MA0436.1	YPR022C	CCCCACN	2.05e-07	0.000424	0.759	2065	2661	2661	2661	1.14	1067	40.1	888	33.37
MA1188.1	At3g11280	AWYCTTATCTTHWY	1.1e-06	0.000437	0.782	397	2661	2661	2661	1.78	176	6.61	99	3.72
MA0015.1	Cf2	RTATATRTAB	1.26e-06	0.000515	0.923	408	2661	2661	2661	1.03	250	9.39	158	5.94
MA0196.1	NK7.1	TTAATTR	6.3e-07	0.000541	0.968	858	2661	2661	2661	1.69	321	12.06	214	8.04
MA1260.1	AT1G77640	KDNGDNGDHDDTGTCGGTGGH	2.22e-06	0.000548	0.981	247	2661	2661	2661	1.1	159	5.98	88	3.31
UP00211_1	Pou3f3_3235.2	WANDTATGCATAATDDA	1.64e-06	0.000569	1.02	348	2661	2661	2661	1.49	181	6.8	104	3.91
MA0073.1	RREB1	CCCCMAAMCAMCCMCMMMCV	9.08e-07	0.000572	1.02	630	2661	2661	2661	1.25	370	13.9	257	9.66
MA0465.1	CDX2	VDGYMATAAAA	2.04e-06	0.000581	1.04	285	2661	2661	2661	3.35	127	4.77	64	2.41
MA0209.1	ap	YTAATTA	1.17e-06	0.0006	1.07	512	2661	2661	2661	8.53	71	2.67	25	0.94
MA0715.1	PROP1	TAATYWAATTA	3.09e-06	0.0006	1.07	194	2661	2661	2661	1.08	127	4.77	65	2.44
MA0742.1	Klf12	GRCCACGCCCWHHWH	2.2e-06	0.000611	1.09	278	2661	2661	2661	1.08	176	6.61	101	3.8
MA0090.2	TEAD1	YRCATTCCWH	6.15e-07	0.000652	1.17	1061	2661	2661	2661	1.05	589	22.13	448	16.84
UP00060_1	Max_primary	DGASCACGTGBTNNKK	9.64e-07	0.000656	1.17	681	2661	2661	2661	2.32	245	9.21	153	5.75
MA0788.1	POU3F3	WWTATGCWAATTW	1.78e-06	0.000664	1.19	374	2661	2661	2661	1.24	210	7.89	127	4.77
MA0499.1	Myod1	NSCAGCTGYYNYB	5.94e-07	0.000675	1.21	1138	2661	2661	2661	17	173	6.5	95	3.57
MA0661.1	MEOX1	VSTAATTAHC	1.26e-06	0.000679	1.22	540	2661	2661	2661	3.68	103	3.87	46	1.73
UP00064_2	Sox18_secondary	RBRSTRAATTYADDHN	5.35e-07	0.000687	1.23	1284	2661	2661	2661	1.09	668	25.1	519	19.5
MA0555.1	SVP	NWWWCCAAAAAWGGAAARAH	2.03e-06	0.000689	1.23	340	2661	2661	2661	1.5	193	7.25	114	4.28
MA0001.2	AGL3	VKTWCCAWWWATAGWWMN	2.05e-06	0.000691	1.24	337	2661	2661	2661	1.81	154	5.79	84	3.16
MA0726.1	VSX2	CTAATTAN	1.27e-06	0.000696	1.25	547	2661	2661	2661	2.5	149	5.6	79	2.97
MA0654.1	ISX	YYAATTAR	1.73e-06	0.000698	1.25	404	2661	2661	2661	7.9	78	2.93	30	1.13
MA0379.1	MOT2	ATATA	1.4e-06	0.000728	1.3	520	2661	2661	2661	2.47	179	6.73	102	3.83
UP00076_2	Rfxdc2_secondary	BBRCDTRGAKACSVNWH	1.52e-06	0.000741	1.33	486	2661	2661	2661	1.88	163	6.13	90	3.38
MA0546.1	pha-4	WRWGYAAAYA	1.66e-06	0.000746	1.34	449	2661	2661	2661	2.13	234	8.79	146	5.49
MA0036.3	GATA2	NBCTTATCTNH	1.55e-06	0.000798	1.43	515	2661	2661	2661	1.34	265	9.96	171	6.43
MA0095.2	YY1	CAARATGGCBGC	2.05e-06	0.000806	1.44	393	2661	2661	2661	2.72	154	5.79	84	3.16
UP00116_1	Rhox6_4251.1	WVMMYTAATTARTBSNH	2.12e-06	0.000808	1.45	382	2661	2661	2661	1.37	189	7.1	111	4.17
MA0186.1	Dfd	TTAATGA	1.67e-06	0.000881	1.58	529	2661	2661	2661	1.09	308	11.57	207	7.78
MA0519.1	Stat5a::Stat5b	DTTTCCMAGAA	1.37e-06	0.000883	1.58	646	2661	2661	2661	1.19	348	13.08	240	9.02
MA0548.2	AGL15	NTTTCCWTTTTDGGWAANT	4.61e-06	0.000884	1.58	192	2661	2661	2661	6.14	66	2.48	24	0.9
MA0793.1	POU6F2	ASCTMATTAW	2.37e-06	0.000912	1.63	385	2661	2661	2661	1.08	230	8.64	144	5.41
UP00025_2	Foxk1_secondary	MHAAYMAYAACAHHN	8.11e-07	0.000962	1.72	1187	2661	2661	2661	3.74	274	10.3	176	6.61
MA1266.1	RAP211	CYDYCDYCGCCGGCN	1.85e-06	0.000995	1.78	539	2661	2661	2661	144	19	0.71	0	0
MA0175.1	lms	YTAATTR	1.5e-06	0.00102	1.83	680	2661	2661	2661	10.4	40	1.5	8	0.3
MA0741.1	KLF16	GMCACGCCCCC	8.6e-07	0.00103	1.84	1194	2661	2661	2661	1.34	567	21.31	430	16.16
MA0012.1	br(var.3)	TAAACWARWNS	8.87e-07	0.00109	1.94	1224	2661	2661	2661	3.57	254	9.55	160	6.01
MA0500.1	Myog	RRCAGCTGSNV	1.03e-06	0.00113	2.03	1102	2661	2661	2661	7.49	340	12.78	232	8.72
MA0641.1	ELF4	AACCCGGAAGTR	6.85e-06	0.00117	2.09	171	2661	2661	2661	1.1	112	4.21	56	2.1
MA0068.2	PAX4	CTAATTAG	2.42e-06	0.00121	2.16	499	2661	2661	2661	2.73	136	5.11	71	2.67
MA1115.1	POU5F1	WHATGCAAATN	1.29e-06	0.00123	2.21	956	2661	2661	2661	1.18	502	18.87	374	14.05
MA0759.1	ELK3	ACCGGAAGTD	2.69e-06	0.00126	2.25	468	2661	2661	2661	5.46	83	3.12	34	1.28
MA0908.1	HOXD11	RTCGTAAAAH	4.04e-06	0.00127	2.28	315	2661	2661	2661	2.21	122	4.58	62	2.33
MA0998.1	ERF096	NMGCCGCCDN	1.13e-06	0.0013	2.33	1149	2661	2661	2661	10.3	54	2.03	15	0.56
MA1401.1	EPR1	RAAAATATCTWA	2.15e-05	0.0014	2.5	65	2661	2661	2661	2.08	44	1.65	13	0.49
UP00091_1	Sox5_primary	WWDRGAACAATWRDHD	2.14e-06	0.00142	2.54	661	2661	2661	2661	1.11	376	14.13	266	10
MA0890.1	GBX2	RSYAATTARN	3.44e-06	0.00147	2.64	428	2661	2661	2661	5.26	110	4.13	53	1.99
MA0221.1	eve	YTAATKA	2.26e-06	0.00153	2.74	678	2661	2661	2661	6.01	91	3.42	39	1.47
MA0343.1	NDT80	HHTHCKGMCACAAAAACSVDA	2.55e-06	0.00154	2.76	604	2661	2661	2661	2.74	221	8.31	137	5.15
MA1193.1	At2g38090	AAWRDWDWGGATAAGDATRRD	8.65e-06	0.0017	3.05	197	2661	2661	2661	9.5	46	1.73	13	0.49
UP00202_1	Dlx1_1741.2	NTGMRDTAATTAAY	6.37e-06	0.00173	3.1	272	2661	2661	2661	12.5	43	1.62	11	0.41
MA0228.1	ind	YTAATKA	4.61e-06	0.00179	3.21	390	2661	2661	2661	9.57	66	2.48	24	0.9
MA0040.1	Foxq1	HATTGTTTATW	4.75e-06	0.00179	3.21	378	2661	2661	2661	2.3	164	6.16	94	3.53
MA0027.2	EN1	SYAATTAV	2.96e-06	0.00182	3.26	616	2661	2661	2661	3.19	154	5.79	85	3.19
MA0763.1	ETV3	ACCGGAAGTR	4.12e-06	0.00191	3.42	464	2661	2661	2661	9.86	42	1.58	10	0.38
MA0854.1	Alx1	CGMRYTAATTARTNMNY	1.04e-05	0.00195	3.49	187	2661	2661	2661	1.28	112	4.21	57	2.14
MA0598.2	EHF	WACCCGGAAGTA	7.05e-06	0.00201	3.61	286	2661	2661	2661	3.06	95	3.57	44	1.65
UP00099_2	Ascl2_secondary	BYVWCCCCDCCCNRBH	8.97e-07	0.00208	3.73	2326	2661	2661	2661	2.24	265	9.96	169	6.35
MA1203.1	AGL63	TKCCAAAAATGGMAA	9.5e-06	0.0021	3.76	221	2661	2661	2661	3.09	81	3.04	35	1.32
MA1326.1	ATHB33	NHGTRATTARB	6.41e-06	0.00219	3.92	342	2661	2661	2661	4.36	101	3.8	48	1.8
MA0485.1	Hoxc9	RGCCATAAATCAY	6.37e-06	0.00221	3.96	348	2661	2661	2661	2.25	138	5.19	75	2.82
UP00229_1	Otx1_2325.1	DGWRGGGATTAATWNNN	1.04e-05	0.00235	4.21	226	2661	2661	2661	1.5	112	4.21	57	2.14
UP00257_1	Shox2_2641.2	SDMNYTAATTARKYVNB	8.84e-06	0.00236	4.22	267	2661	2661	2661	2.69	90	3.38	41	1.54
MA0243.1	sd	GWMATTYNWVRN	2.14e-06	0.00241	4.31	1128	2661	2661	2661	1.17	557	20.93	426	16.01
MA0720.1	Shox2	YYAATTAR	4.61e-06	0.00245	4.39	533	2661	2661	2661	7.51	66	2.48	24	0.9
MA0505.1	Nr5a2	RAGTTCAAGGYCAGS	4.15e-06	0.00252	4.51	609	2661	2661	2661	67	36	1.35	7	0.26
UP00171_1	Msx3_3206.1	VAHAACYAATTAANHH	9.9e-06	0.0026	4.66	263	2661	2661	2661	2.02	119	4.47	62	2.33
MA1185.1	LHY1	AGATATTTTN	1.96e-05	0.00261	4.67	133	2661	2661	2661	1.91	73	2.74	31	1.16
UP00248_1	Pax7_3783.1	MSHNYTAATTARBHVDN	4.61e-06	0.00267	4.78	581	2661	2661	2661	8.34	66	2.48	24	0.9
MA0046.2	HNF1A	DRTTAATNATTAACN	1.57e-05	0.0027	4.83	172	2661	2661	2661	1.13	112	4.21	58	2.18
MA1162.1	TCX2	WTTYAAAATTYAAAW	1.7e-05	0.00285	5.09	168	2661	2661	2661	7.21	48	1.8	15	0.56
MA0658.1	LHX6	RCTAATTARY	9.07e-06	0.00325	5.82	359	2661	2661	2661	5.09	69	2.59	27	1.01
MA0229.1	inv	TYTAATTA	1.28e-05	0.00329	5.89	257	2661	2661	2661	7.97	86	3.23	39	1.47
MA1418.1	IRF3	NSRRAAMGGAAACCGAAACYR	9.1e-05	0.00336	6.02	37	2661	2661	2661	1.48	30	1.13	7	0.26
MA0084.1	SRY	NWWAACAAT	2.47e-06	0.00339	6.07	1378	2661	2661	2661	3.82	236	8.87	149	5.6
MA0952.1	ATHB-51	AATWATTG	1.48e-05	0.00344	6.17	233	2661	2661	2661	1.05	148	5.56	85	3.19
MA0035.3	Gata1	TYCTTATCTSY	1.11e-05	0.00349	6.25	315	2661	2661	2661	2.54	136	5.11	75	2.82
MA0853.1	Alx4	CGCRYTAATTARYHNNY	1.89e-05	0.00356	6.37	189	2661	2661	2661	8.93	37	1.39	9	0.34
MA1399.1	At5g08520	DWWDWRGATAAGR	1.75e-05	0.00362	6.49	208	2661	2661	2661	1.49	113	4.25	59	2.22
MA0137.3	STAT1	TTTCYRGGAAA	1.04e-05	0.00386	6.91	370	2661	2661	2661	1.3	205	7.7	129	4.85
MA0051.1	IRF2	SGAAAGYGAAASCRWWWM	6.18e-05	0.00401	7.17	65	2661	2661	2661	1.38	45	1.69	15	0.56
MA0250.1	unc-4	TTAATTG	9.34e-06	0.00402	7.2	432	2661	2661	2661	17.9	23	0.86	2	0.08
UP00042_2	Gm397_secondary	NVMVGCACACACKCVH	3.04e-06	0.00407	7.29	1344	2661	2661	2661	1.09	740	27.81	596	22.4
UP00267_1	Otx2_3441.1	NDDRGGGATTAATHDTC	1.64e-05	0.00408	7.3	249	2661	2661	2661	2.47	91	3.42	43	1.62
MA1183.1	At5g52660	AGATATTTTTD	3.07e-05	0.00414	7.41	135	2661	2661	2661	12.7	36	1.35	9	0.34
MA0318.1	HMRA2	CRTGTAAW	8.32e-06	0.00424	7.59	511	2661	2661	2661	1.04	300	11.27	207	7.78
MA1258.1	DREB2	NRDYDAWGKCGGTGRHKRNDR	1.47e-05	0.00438	7.85	299	2661	2661	2661	2.53	119	4.47	63	2.37
MA0993.1	ERF7	MGCCGYCRNN	3.71e-06	0.00442	7.9	1194	2661	2661	2661	8.18	18	0.68	0	0
MA0760.1	ERF	ACCGGAAGTR	1.07e-05	0.00445	7.97	419	2661	2661	2661	1.32	216	8.12	138	5.19
UP00187_1	Alx4_1744.1	CGCRYTAATTARYHNNB	2.61e-05	0.00489	8.75	188	2661	2661	2661	2.09	81	3.04	37	1.39
MA1237.1	AT4G16750	CNHCDYCRCCGACAH	1.19e-05	0.00502	8.99	423	2661	2661	2661	1.62	197	7.4	123	4.62
MA1379.1	SOL1	WTTWAAAATTTAAAW	3.33e-05	0.00515	9.22	155	2661	2661	2661	4.47	64	2.41	26	0.98
MA0028.2	ELK1	ACCGGAAGTR	2.15e-05	0.00524	9.37	244	2661	2661	2661	8.25	44	1.65	13	0.49
MA0994.1	ERF8	CGCCGYCANN	5.16e-06	0.00526	9.41	1022	2661	2661	2661	7.72	29	1.09	4	0.15
MA1155.1	ZSCAN4	TGCACACACTGAAAA	1.37e-05	0.00537	9.62	394	2661	2661	2661	10.3	77	2.89	33	1.24
UP00106_1	Vax2_3500.1	NDNCRCTAATTAABVC	1.8e-05	0.00551	9.87	307	2661	2661	2661	1.05	189	7.1	118	4.43
