# Supplementary material for: Integrated Analysis of Omics Data Reveal AP-1 as a Potential Regulation Hub in the Inflammation-Induced Hyperalgesia Rat Model
Source: Front Immunol. 2021 May 28;12:672498. doi: 10.3389/fimmu.2021.672498 (PMC8194263; doi:10.3389/fimmu.2021.672498)
Supplement: Supplementary file 9 [file Table_8.xlsx]

## Sheet: HyperMethylation
chr	start	end	meth_diff	Cpg_number	pvalue	qvalue	Annotation	Detailed.Annotation	Distance.to.TSS	Nearest.PromoterID	Gene.Name
chr9	8720416	8720538	0.192689	14	2.2021e-33	1.2442e-27	Intergenic	Intergenic	11360	NM_133284	Pgc
chr7	120582586	120582698	0.56085	10	6.2932e-29	3.5556e-23	exon (NM_001207022, exon 3 of 4)	-exon (NM_001207022, exon 3 of 4)	4578	NM_001207022	Shisa8
chr18	62914951	62915070	0.171202	12	9.3171e-29	5.2642e-23	intron (NM_001008385, intron 1 of 2)	-intron (NM_001008385, intron 1 of 2)	166	NM_001008385	Pmaip1
chr2	224815682	224815812	0.196304	15	1.0237e-28	5.784e-23	promoter-TSS (NM_001044290)	-promoter-TSS (NM_001044290)	43	NM_001044290	Larp7
chr20	5186626	5186719	0.154009	18	1.0515e-26	5.9411e-21	intron (NM_181092, intron 3 of 19)	-intron (NM_181092, intron 3 of 19)	-3266	NM_001113409	Syngap1
chr20	54907165	54907295	0.184979	12	1.0766e-25	6.0827e-20	promoter-TSS (NM_001107641)	-promoter-TSS (NM_001107641)	-948	NM_001107641	Sim1
chr2	115287738	115287857	0.150967	24	3.6452e-25	2.0595e-19	Intergenic	Intergenic	-19142	NM_030992	Pld1
chr1	80514541	80514893	0.271693	21	6.6145e-25	3.7372e-19	promoter-TSS (NM_017344)	-promoter-TSS (NM_017344)	-578	NM_017344	Gsk3a
chr17	26998686	26998793	0.44468	11	9.395e-25	5.3081e-19	Intergenic	Intergenic	33718	NM_001305178	Mcur1
chr7	137872777	137872897	0.420249	10	2.2241e-24	1.2566e-18	Intergenic	Intergenic	-2832	NM_001014204	Dnajc22
chr2	186761312	186761632	0.283107	18	3.3975e-24	1.9196e-18	Intergenic	Intergenic	115798	NM_031114	S100a10
chrX	122513185	122513330	0.426004	10	1.3662e-23	7.7191e-18	Intergenic	Intergenic	116684	NM_001109368	Pramel
chr4	57081627	57081905	0.225471	12	1.7066e-23	9.6421e-18	Intergenic	Intergenic	-6563	NR_031901	Mir183
chr3	41562432	41562856	0.380521	16	2.1338e-23	1.2056e-17	exon (NM_001002854, exon 26 of 26)	-exon (NM_001002854, exon 26 of 26)	40273	NM_001014179	Wdsub1
chr1	94893561	94893986	0.327339	10	2.9443e-23	1.6635e-17	Intergenic	Intergenic	26967	NM_019122	Syt3
chr5	118126665	118126835	0.153714	14	3.2646e-23	1.8445e-17	Intergenic	Intergenic	-38491	NM_012988	Nfia
chr7	116388268	116388443	0.192696	12	2.6932e-22	1.5217e-16	intron (NM_001134529, intron 6 of 7)	-intron (NM_001134529, intron 6 of 7)	8575	NM_001134529	Kctd17
chr4	165760861	165761039	0.424939	17	3.1959e-22	1.8057e-16	intron (NM_001024337, intron 1 of 6)	-intron (NM_001024337, intron 1 of 6)	692	NM_001024337	LOC500331
chr3	59346889	59347045	0.175443	10	3.2542e-22	1.8386e-16	promoter-TSS (NM_001024780)	-promoter-TSS (NM_001024780)	-456	NM_001024780	Prkra
chr8	38506027	38506091	0.329703	10	9.731e-22	5.498e-16	promoter-TSS (NM_001191994)	-promoter-TSS (NM_001191994)	-27	NM_001191994	Slc37a2
chr10	84099762	84099866	0.236282	18	9.8533e-22	5.5671e-16	promoter-TSS (NM_001100496)	-promoter-TSS (NM_001100496)	-176	NM_001100496	Spop
chr17	16520957	16521069	0.159501	12	1.0274e-21	5.8046e-16	Intergenic	Intergenic	-21970	NM_012965	Hrh2
chr20	54581907	54582026	0.205115	10	3.3408e-21	1.8876e-15	intron (NM_001277057, intron 1 of 42)	-intron (NM_001277057, intron 1 of 42)	314	NM_001277057	Ascc3
chr9	56853666	56853826	0.168503	28	3.5274e-21	1.993e-15	intron (NM_001008527, intron 32 of 33)	-intron (NM_001008527, intron 32 of 33)	-25313	NM_001008523	Aox4
chr15	33122371	33122492	0.402133	14	8.5375e-21	4.8236e-15	promoter-TSS (NM_001107263)	-promoter-TSS (NM_001107263)	-608	NM_001107263	Ngdn
chr17	40190044	40190199	0.160405	13	1.0211e-20	5.7693e-15	promoter-TSS (NM_001106108)	-promoter-TSS (NM_001106108)	-146	NM_001106108	Irf4
chr15	45256212	45256312	0.2709	11	1.0417e-20	5.8856e-15	Intergenic	Intergenic	-3191	NM_001108382	Ccdc25
chr4	106117923	106118237	0.151688	10	1.0975e-20	6.2006e-15	promoter-TSS (NM_138840)	-promoter-TSS (NM_138840)	-174	NM_138840	Tgoln2
chr7	98952260	98952376	0.164391	12	2.3295e-20	1.3162e-14	promoter-TSS (NM_012603)	-promoter-TSS (NM_012603)	-824	NM_012603	Myc
chr8	123378394	123378610	0.232765	13	3.268e-20	1.8464e-14	Intergenic	Intergenic	-26038	NM_001191080	Golga4
chr1	79228427	79228730	0.254899	10	4.0217e-20	2.2723e-14	intron (NM_017076, intron 1 of 7)	-intron (NM_017076, intron 1 of 7)	484	NM_017076	PVR
chr10	85623332	85623400	0.236802	10	4.1138e-20	2.3243e-14	TTS (NM_001108294)	-TTS (NM_001108294)	15121	NR_031894	Mir152
chr10	92343887	92344286	0.414518	10	2.0284e-19	1.146e-13	intron (NM_001105846, intron 1 of 24)	-intron (NM_001105846, intron 1 of 24)	539	NM_001105846	Fmnl1
chr5	115282617	115282698	0.245026	10	2.582e-19	1.4588e-13	Intergenic	Intergenic	-58451	NM_001039345	Eqtn
chr12	45355161	45355296	0.17861	23	3.1135e-19	1.7591e-13	promoter-TSS (NM_001191928)	-promoter-TSS (NM_001191928)	-114	NM_001191928	Mn1
chr4	65797618	65797797	0.239009	17	4.3609e-19	2.4639e-13	Intergenic	Intergenic	96983	NM_173045	Zc3hav1
chr20	28320441	28320545	0.245859	10	9.1963e-19	5.1959e-13	Intergenic	Intergenic	-128187	NM_001007601	Pcbd1
chr10	89563364	89563515	0.171504	10	9.9339e-19	5.6126e-13	intron (NM_213625, intron 1 of 13)	-intron (NM_213625, intron 1 of 13)	283	NM_213625	Dnajc7
chr10	4494968	4495100	0.185568	12	1.3355e-18	7.5458e-13	promoter-TSS (NM_001034083)	-promoter-TSS (NM_001034083)	-323	NM_001034083	Snn
chr2	113269256	113269515	0.446684	10	1.8262e-18	1.0318e-12	promoter-TSS (NM_032075)	-promoter-TSS (NM_032075)	-237	NM_032075	Ghsr
chr12	14506354	14506488	0.298376	10	1.9518e-18	1.1028e-12	promoter-TSS (NM_133393)	-promoter-TSS (NM_133393)	-698	NM_133393	Lfng
chrX	127812909	127813016	0.447005	10	2.5745e-18	1.4546e-12	promoter-TSS (NM_001024890)	-promoter-TSS (NM_001024890)	-221	NM_001024890	Pih1d3
chr3	163457187	163457295	0.231195	10	2.6488e-18	1.4966e-12	Intergenic	Intergenic	-2042	NM_201420	Tfap2c
chr10	11540076	11540234	0.153276	10	2.6496e-18	1.497e-12	Intergenic	Intergenic	-58525	NM_133381	Crebbp
chr7	28114762	28114905	0.157263	10	4.114e-18	2.3244e-12	Intergenic	Intergenic	-3034	NM_012887	Tmpo
chr17	11963340	11963625	0.563902	10	4.2703e-18	2.4127e-12	Intergenic	Intergenic	-28692	NM_080908	Slc28a3
chr14	85909441	85909508	0.165607	12	4.4095e-18	2.4914e-12	promoter-TSS (NM_053649)	-promoter-TSS (NM_053649)	100	NM_053649	Kremen1
chr5	169336661	169336972	0.167931	18	4.6515e-18	2.6281e-12	exon (NM_201272, exon 13 of 22)	-exon (NM_201272, exon 13 of 22)	-7878	NM_001137644	Tnfrsf25
chr7	74629854	74629970	0.394737	12	5.3514e-18	3.0235e-12	promoter-TSS (NM_001271300)	-promoter-TSS (NM_001271300)	-132	NM_001271300	Cthrc1
chr17	97121019	97121154	0.411887	12	6.9659e-18	3.9357e-12	Intergenic	Intergenic	362453	NM_053682	Yme1l1
chr4	56313499	56313637	0.215016	21	7.2897e-18	4.1186e-12	promoter-TSS (NM_001191862)	-promoter-TSS (NM_001191862)	-139	NM_001191862	Flnc
chr1	212555593	212555719	0.246461	10	1.0783e-17	6.0922e-12	Intergenic	Intergenic	-13035	NM_031344	Fads2
chr11	59431780	59431923	0.172913	10	1.1342e-17	6.4082e-12	Intergenic	Intergenic	-32639	NM_001105880	Zbtb20
chr10	93312966	93313124	0.251671	18	1.2908e-17	7.2928e-12	intron (NR_126014, intron 1 of 11)	-intron (NM_001301812, intron 1 of 12)	885	NM_001301812	Crhr1
chr7	114709276	114709391	0.1993	11	1.428e-17	8.068e-12	promoter-TSS (NM_001025122)	-promoter-TSS (NM_001025122)	-785	NM_001025122	Cyhr1
chr5	149686555	149686717	0.204014	13	1.9366e-17	1.0942e-11	Intergenic	Intergenic	-35369	NM_001108684	Pum1
chr3	91473921	91474101	0.150535	16	2.0227e-17	1.1428e-11	promoter-TSS (NM_001191853)	-promoter-TSS (NM_001191853)	-37	NM_001191853	Dnajc24
chr2	848110	848498	0.153667	29	2.0508e-17	1.1587e-11	Intergenic	Intergenic	-605574	NM_030836	Erap1
chr6	106005299	106005396	0.17626	13	2.4072e-17	1.3601e-11	Intergenic	Intergenic	-166548	NM_139330	Sipa1l1
chr16	19582204	19582326	0.389348	13	2.9214e-17	1.6506e-11	exon (NM_001044230, exon 7 of 8)	-exon (NM_001044230, exon 7 of 8)	14150	NM_001044240	Gdf1
chr7	31474688	31474769	0.166354	10	2.9315e-17	1.6563e-11	Intergenic	Intergenic	125372	NM_001106781	Ndufa12
chr4	118752944	118753080	0.185772	10	5.7391e-17	3.2426e-11	Intergenic	Intergenic	-1406	NM_181087	Cyp26b1
chr7	116901677	116901819	0.156765	11	7.1107e-17	4.0175e-11	promoter-TSS (NM_001012747)	-promoter-TSS (NM_001012747)	32	NM_001012747	Nol12
chr10	74436527	74436651	0.215774	12	8.2215e-17	4.6451e-11	Intergenic	Intergenic	49415	NM_001100630	Ints2
chr17	4280712	4280783	0.359912	10	9.0435e-17	5.1095e-11	Intergenic	Intergenic	-262742	NM_031007	Adcy2
chr3	41573687	41573895	0.298643	10	1.2151e-16	6.8652e-11	intron (NM_001014179, intron 10 of 10)	-intron (NM_001014179, intron 10 of 10)	29126	NM_001014179	Wdsub1
chr10	103312678	103312804	0.162289	13	1.4267e-16	8.061e-11	promoter-TSS (NM_001034958)	-promoter-TSS (NM_001034958)	-543	NM_001034958	Fam104a
chr9	74752959	74753067	0.214767	10	1.5518e-16	8.7679e-11	exon (NM_001005906, exon 2 of 4)	-exon (NM_001005906, exon 2 of 4)	1626	NM_001005906	Chpf
chr7	127864701	127864917	0.198702	14	2.4904e-16	1.4071e-10	exon (NM_021676, exon 21 of 24)	-exon (NM_021676, exon 21 of 24)	-20590	NM_012490	Acr
chr14	105005308	105005426	0.257651	10	2.7983e-16	1.581e-10	intron (NM_001191683, intron 1 of 3)	-intron (NM_001191683, intron 1 of 3)	2623	NM_001191683	Bcl11a
chr8	104501099	104501226	0.230941	10	2.8714e-16	1.6223e-10	Intergenic	Intergenic	-6438	NM_001014095	Dzip1l
chr2	232789636	232789698	0.267824	10	3.0688e-16	1.7338e-10	Intergenic	Intergenic	-9299	NM_001109385	Slc9b2
chr8	55845996	55846101	0.226707	10	5.8083e-16	3.2817e-10	Intergenic	Intergenic	259043	NM_001103354	LOC100125362
chrX	22700595	22700703	0.250116	10	7.449e-16	4.2087e-10	Intergenic	Intergenic	-77806	NM_001191586	Bcor
chr16	23027334	23027469	0.221614	10	8.3061e-16	4.6929e-10	intron (NM_001012048, intron 1 of 8)	-intron (NM_001012048, intron 1 of 8)	462	NM_001012048	Sh2d4a
chr1	211408312	211408544	0.236345	12	9.2339e-16	5.2171e-10	promoter-TSS (NM_031704)	-promoter-TSS (NM_031704)	-388	NM_031704	Stx5
chr10	83304587	83304764	0.18039	13	1.0962e-15	6.1936e-10	exon (NM_022296, exon 2 of 11)	-exon (NM_022296, exon 2 of 11)	6612	NM_022296	Xylt2
chr10	75751866	75752000	0.155061	18	1.1107e-15	6.2755e-10	Intergenic	Intergenic	-33564	NM_001129777	Rad51c
chr9	8296979	8297107	0.307918	12	1.1227e-15	6.3431e-10	Intergenic	Intergenic	14415	NM_001106886	RGD1565959
chr14	20087945	20088105	0.271378	10	1.2723e-15	7.1885e-10	Intergenic	Intergenic	-37526	NM_023980	Npffr2
chr7	11080494	11080525	0.206464	10	1.5123e-15	8.5447e-10	intron (NM_001108070, intron 2 of 11)	-intron (NM_001108070, intron 2 of 11)	1079	NM_001108070	Dos
chr1	73580863	73581058	0.219923	19	1.9342e-15	1.0928e-09	Intergenic	Intergenic	-12174	NM_001008944	Vom1r59
chr18	49142346	49142449	0.185067	10	1.9403e-15	1.0962e-09	Intergenic	Intergenic	112624	NM_001191697	Cep120
chr8	113349403	113349620	0.35032	10	2.28e-15	1.2882e-09	exon (NM_024352, exon 5 of 18)	-exon (NM_024352, exon 5 of 18)	1309	NM_024352	Mst1
chr3	345198	345371	0.24096	10	2.4361e-15	1.3764e-09	Intergenic	Intergenic	934652	NM_001024308	LOC499742
chr4	135079055	135079338	0.160116	10	2.4479e-15	1.3831e-09	Intergenic	Intergenic	74230	NM_001107879	Rybp
chr12	27698801	27698937	0.254439	10	3.0198e-15	1.7062e-09	intron (NM_053670, intron 1 of 5)	-intron (NM_053670, intron 1 of 5)	3872	NM_053670	Crcp
chr16	19346821	19347086	0.374246	10	3.4179e-15	1.9311e-09	intron (NM_001013880, intron 5 of 10)	-intron (NM_001013880, intron 5 of 10)	1187	NM_001013880	Isyna1
chr5	154208964	154209245	0.31392	24	3.5262e-15	1.9923e-09	TTS (NM_001012746)	-TTS (NM_001012746)	8263	NM_001012746	Rcan3
chr20	9956989	9957291	0.18727	12	3.7406e-15	2.1134e-09	exon (NM_022607, exon 3 of 4)	-exon (NM_022607, exon 3 of 4)	6031	NM_022607	Ndufv3
chr5	99792501	99792605	0.171489	10	3.8099e-15	2.1526e-09	Intergenic	Intergenic	192979	NM_001025022	Lurap1l
chr2	59837689	59837816	0.226933	13	4.2917e-15	2.4248e-09	promoter-TSS (NM_001029915)	-promoter-TSS (NM_001029915)	19	NM_001029915	Brix1
chr18	77595734	77595846	0.215202	10	5.04e-15	2.8476e-09	Intergenic	Intergenic	-1935	NM_001244933	Nfatc1
chr13	81572175	81572309	0.235499	10	6.8619e-15	3.877e-09	intron (NM_170789, intron 1 of 7)	-intron (NM_001205304, intron 1 of 6)	56859	NM_001205304	Cd247
chr13	88376960	88377068	0.162068	13	7.2035e-15	4.07e-09	promoter-TSS (NM_024144)	-promoter-TSS (NM_024144)	-198	NM_024144	Pigm
chr12	27103235	27103292	0.180977	16	7.5858e-15	4.2859e-09	intron (NM_001077201, intron 2 of 5)	-intron (NM_001077201, intron 2 of 5)	184239	NM_001077201	Caln1
chr1	135302225	135302451	0.176646	15	7.5967e-15	4.2921e-09	Intergenic	Intergenic	-48102	NR_037346	Mir3597-3
chr2	204598325	204598420	0.183321	10	9.3721e-15	5.2952e-09	intron (NM_001163568, intron 2 of 10)	-intron (NM_001163568, intron 2 of 10)	24821	NM_001163568	Fam102b
chr5	136975745	136975979	0.188071	22	9.4489e-15	5.3386e-09	promoter-TSS (NM_057114)	-promoter-TSS (NM_057114)	82	NM_057114	Prdx1
chr3	143193921	143194015	0.224078	10	9.9576e-15	5.626e-09	promoter-TSS (NM_001107790)	-promoter-TSS (NM_001107790)	-99	NM_001107790	Tpx2
chr10	31117189	31117279	0.391982	10	1.1298e-14	6.3833e-09	Intergenic	Intergenic	-22248	NM_001013966	Thg1l
chr9	105574927	105575065	0.187329	10	1.1518e-14	6.5074e-09	Intergenic	Intergenic	70078	NM_013017	Rab12
chr5	160441650	160441884	0.162676	12	1.2708e-14	7.1802e-09	Intergenic	Intergenic	-10149	NM_001271495	LOC690911
chrX	29125808	29125930	0.26573	10	1.4762e-14	8.3406e-09	intron (NM_001191730, intron 1 of 8)	-intron (NM_001191730, intron 1 of 8)	562	NM_001191730	Shroom4
chr5	108910847	108910911	0.217508	10	1.5638e-14	8.8352e-09	exon (NM_031550, exon 3 of 4)	-exon (NM_031550, exon 3 of 4)	5501	NM_031550	Cdkn2a
chr9	90712377	90712539	0.290634	10	1.5699e-14	8.8696e-09	intron (NM_001012204, intron 1 of 15)	-intron (NM_001012204, intron 1 of 15)	493	NM_001012204	Traf3ip1
chr20	10075380	10075473	0.171469	10	1.646e-14	9.2998e-09	promoter-TSS (NM_012522)	-promoter-TSS (NM_012522)	93	NM_012522	Cbs
chr18	28269619	28269771	0.182691	17	1.8241e-14	1.0306e-08	Intergenic	Intergenic	-5893	NM_001024240	Mzb1
chr16	18336176	18336339	0.379657	12	2.1492e-14	1.2143e-08	Intergenic	Intergenic	70789	NM_153731	Zfp709
chr1	99100584	99100973	0.192927	22	2.3258e-14	1.3141e-08	intron (NM_138529, intron 1 of 37)	-intron (NM_138529, intron 1 of 37)	59735	NM_138529	Nav2
chr7	10025738	10025830	0.23342	10	2.6458e-14	1.4949e-08	Intergenic	Intergenic	-3453	NM_017245	Eef2
chr19	24942889	24943106	0.216708	25	2.7278e-14	1.5412e-08	intron (NM_001191557, intron 1 of 4)	-intron (NM_001191557, intron 1 of 4)	273	NM_001191557	Syce2
chr2	123963397	123963551	0.169679	13	2.7601e-14	1.5595e-08	promoter-TSS (NM_181363)	-promoter-TSS (NM_181363)	599	NM_001108549	Spata5
chr1	93609187	93609375	0.251434	18	2.7608e-14	1.5598e-08	Intergenic	Intergenic	-125574	NM_001106249	Siglec5
chr7	10028907	10029052	0.193734	12	2.7955e-14	1.5795e-08	Intergenic	Intergenic	-1145	NM_001100757	Pias4
chr4	184642733	184642870	0.216276	10	3.8063e-14	2.1505e-08	intron (NM_001106628, intron 1 of 7)	-intron (NM_001106628, intron 1 of 7)	374	NM_001106628	Mrps35
chr19	14306945	14307210	0.23914	10	3.9368e-14	2.2243e-08	promoter-TSS (NM_001008291)	-promoter-TSS (NM_001008291)	-498	NM_001008291	Tfip11
chr7	114030402	114030495	0.405434	10	4.0425e-14	2.284e-08	intron (NM_173331, intron 8 of 13)	-intron (NM_173331, intron 8 of 13)	3755	NM_173331	Mapk15
chrX	22116431	22116536	0.157765	15	4.0636e-14	2.2959e-08	promoter-TSS (NM_001191727)	-promoter-TSS (NM_001191727)	-350	NM_001191727	Med14
chrX	28843375	28843488	0.234508	10	4.8223e-14	2.7246e-08	Intergenic	Intergenic	165564	NM_021670	Bmp15
chr3	114867148	114867222	0.15557	10	4.9846e-14	2.8163e-08	promoter-TSS (NM_138505)	-promoter-TSS (NM_138505)	-172	NM_138505	Adra2b
chr19	17720948	17721174	0.225065	10	6.7517e-14	3.8147e-08	Intergenic	Intergenic	-224489	NM_001106171	Tox3
chr1	94939960	94940143	0.204141	19	6.8121e-14	3.8488e-08	exon (NM_001271081, exon 3 of 3)	-exon (NM_001271081, exon 3 of 3)	-2736	NM_001009643	Aspdh
chr1	242142318	242142548	0.197296	12	7.4293e-14	4.1975e-08	Intergenic	Intergenic	-134017	NM_019277	Exoc6
chrX	61078721	61078965	0.175895	15	8.3768e-14	4.7328e-08	promoter-TSS (NM_001191734)	-promoter-TSS (NM_001191734)	-827	NM_001191734	Ptchd1
chr20	12088594	12088749	0.331494	15	8.4248e-14	4.76e-08	promoter-TSS (NM_001011945)	-promoter-TSS (NM_001011945)	-496	NM_001011945	Pcbp3
chr17	46914869	46915285	0.207641	14	8.8903e-14	5.023e-08	intron (NM_001106110, intron 8 of 9)	-intron (NM_001106110, intron 8 of 9)	55115	NM_001106109	Nrsn1
chr4	120139695	120139822	0.156547	12	9.0438e-14	5.1097e-08	Intergenic	Intergenic	-31552	NM_001025650	Dusp11
chr5	103538557	103538652	0.175763	14	9.7911e-14	5.5319e-08	Intergenic	Intergenic	-64362	NM_001106666	Bnc2
chr4	8151615	8151811	0.169966	10	9.9829e-14	5.6403e-08	intron (NM_080394, intron 1 of 63)	-intron (NM_080394, intron 1 of 63)	840	NM_080394	Reln
chr1	41858286	41858469	0.1591	10	1.0093e-13	5.7026e-08	Intergenic	Intergenic	11949	NM_017051	Sod2
chr7	114760426	114760506	0.19755	10	1.0155e-13	5.7378e-08	promoter-TSS (NM_001024354)	-promoter-TSS (NM_001024354)	-439	NM_001130494	Recql4
chr6	135086160	135086296	0.499834	10	1.0257e-13	5.7951e-08	Intergenic	Intergenic	-118177	NM_001191112	Ppp2r5c
chr12	45272379	45272654	0.395563	10	1.0811e-13	6.1082e-08	Intergenic	Intergenic	82598	NM_001191928	Mn1
chr2	235459816	235459889	0.16049	10	1.0996e-13	6.2129e-08	intron (NM_001108568, intron 1 of 8)	-intron (NM_001108568, intron 1 of 8)	14215	NM_001108568	Dapp1
chr12	20806674	20806887	0.16708	10	1.1228e-13	6.344e-08	promoter-TSS (NM_001105919)	-promoter-TSS (NM_001105919)	-59	NM_001105919	Fis1
chr2	140251128	140251392	0.167323	15	1.1866e-13	6.7043e-08	Intergenic	Intergenic	-29567	NM_001033909	Elf2
chr9	1052529	1052700	0.217327	13	1.3191e-13	7.4529e-08	intron (NM_001013177, intron 5 of 8)	-intron (NM_001013177, intron 5 of 8)	80093	NM_133547	Sult1c2
chr17	6745725	6746142	0.304325	14	1.3926e-13	7.8683e-08	Intergenic	Intergenic	191770	NM_054007	Hsd17b3
chr1	241291967	241292095	0.178713	10	1.8371e-13	1.038e-07	Intergenic	Intergenic	79600	NM_001191917	Btaf1
chr4	5452505	5452839	0.28005	15	1.9018e-13	1.0745e-07	Intergenic	Intergenic	-118806	NM_001025148	Galntl5
chr17	7811578	7811774	0.172788	10	2.1394e-13	1.2088e-07	intron (NM_012558, intron 3 of 5)	-intron (NM_012558, intron 3 of 5)	-12622	NM_053716	Fbp2
chr13	70707732	70707885	0.159851	10	2.8597e-13	1.6157e-07	intron (NM_001108348, intron 1 of 5)	-intron (NM_001108348, intron 1 of 5)	11169	NM_001108348	Lhx4
chr1	199560186	199560279	0.357901	10	3.2948e-13	1.8616e-07	Intergenic	Intergenic	-161332	NM_001107558	Nkx6-2
chr2	218922341	218922518	0.217543	10	3.3765e-13	1.9077e-07	Intergenic	Intergenic	18218	NR_032295	Mir760
chr7	141713262	141713602	0.34274	15	3.4976e-13	1.9761e-07	Intergenic	Intergenic	-4478	NM_001308639	Hoxc11
chr17	92239804	92239933	0.160019	15	3.9616e-13	2.2383e-07	Intergenic	Intergenic	-6597	NM_001012162	Mllt10
chr10	10520357	10520520	0.183022	11	3.9873e-13	2.2528e-07	intron (NM_001135710, intron 10 of 15)	-intron (NM_001135710, intron 10 of 15)	25195	NM_001108265	Nagpa
chr7	114777257	114777342	0.467385	10	4.2175e-13	2.3829e-07	promoter-TSS (NM_001007751)	-promoter-TSS (NM_001007751)	-475	NM_001007751	MGC94207
chr17	37181005	37181131	0.226784	14	4.4218e-13	2.4983e-07	promoter-TSS (NM_001037206)	-promoter-TSS (NM_001037206)	98	NM_001037206	Bphl
chr9	35174658	35174854	0.179373	12	4.5925e-13	2.5948e-07	Intergenic	Intergenic	-10562	NM_133596	Uggt1
chr8	96359353	96359527	0.276942	10	4.6709e-13	2.6391e-07	Intergenic	Intergenic	23466	NM_001108176	Zic4
chr6	11447096	11447444	0.34997	10	4.7758e-13	2.6983e-07	Intergenic	Intergenic	-93475	NM_022292	Kcnk12
chr16	61118707	61118847	0.225911	10	4.842e-13	2.7357e-07	intron (NM_022199, intron 1 of 3)	-intron (NM_022199, intron 1 of 3)	1204	NM_022199	Dusp4
chr1	265705270	265705433	0.220799	10	4.9282e-13	2.7844e-07	Intergenic	Intergenic	-2032	NM_022636	Vax1
chr3	170064679	170064971	0.18736	10	5.0615e-13	2.8597e-07	promoter-TSS (NM_001106550)	-promoter-TSS (NM_001106550)	-243	NM_001106550	Nkain4
chr7	17258715	17259140	0.175769	27	6.2524e-13	3.5326e-07	Intergenic	Intergenic	-707825	NM_001000485	Olr1096
chr3	117969377	117969451	0.222559	10	6.5608e-13	3.7068e-07	exon (NM_001191076, exon 13 of 16)	-exon (NM_001191076, exon 13 of 16)	38363	NM_001106511	Cpxm1
chr5	166222186	166222630	0.157096	17	6.809e-13	3.8471e-07	exon (NM_001305435, exon 11 of 13)	-exon (NM_001305435, exon 11 of 13)	-10478	NM_001204879	Apitd1
chr14	49590127	49590300	0.167565	10	7.0378e-13	3.9763e-07	Intergenic	Intergenic	-1019087	NM_001107216	Arap2
chr18	65820517	65820775	0.305295	10	7.2627e-13	4.1034e-07	Intergenic	Intergenic	-315217	NM_053369	Tcf4
chr12	3672104	3672372	0.228639	12	7.4232e-13	4.1941e-07	exon (NM_001109060, exon 6 of 14)	-exon (NM_001109060, exon 6 of 14)	100133	NM_031336	Kl
chr14	33107514	33107615	0.150265	10	7.4967e-13	4.2356e-07	promoter-TSS (NM_001006959)	-promoter-TSS (NM_001006959)	50	NM_001106002	Polr2b
chr6	132382347	132382450	0.292398	10	7.5755e-13	4.2801e-07	intron (NM_001277288, intron 1 of 2)	-intron (NM_001277287, intron 1 of 3)	1306	NM_001277287	Bcl11b
chr6	136173117	136173569	0.366907	10	8.0351e-13	4.5398e-07	intron (NM_001106759, intron 1 of 11)	-intron (NM_001106759, intron 1 of 11)	808	NM_001106759	Exoc3l4
chr19	54499928	54500332	0.37133	10	8.7851e-13	4.9635e-07	intron (NM_001106196, intron 2 of 13)	-intron (NM_001106196, intron 2 of 13)	20169	NM_001106196	Galnt2
chr13	46859227	46859422	0.18719	10	1.0169e-12	5.7452e-07	Intergenic	Intergenic	-1225	NM_001107176	Optc
chr8	21157686	21157838	0.154576	17	1.0347e-12	5.8463e-07	intron (NM_172324, intron 1 of 6)	-intron (NM_172324, intron 1 of 6)	470	NM_172324	Elavl3
chr16	81886906	81887050	0.247119	10	1.0451e-12	5.9045e-07	Intergenic	Intergenic	177937	NM_001107323	Tubgcp3
chr10	54501293	54501568	0.214741	21	1.1539e-12	6.5195e-07	Intergenic	Intergenic	-14371	NM_021848	Glp2r
chr1	245704460	245704614	0.315963	12	1.1611e-12	6.5602e-07	intron (NM_001108524, intron 7 of 18)	-intron (NM_001108524, intron 7 of 18)	13661	NM_001108524	Aldh18a1
chr10	106369213	106369430	0.174542	12	1.1634e-12	6.573e-07	intron (NM_001108840, intron 8 of 15)	-intron (NM_001108840, intron 8 of 15)	-16105	NM_001107066	Evpl
chr12	11264747	11264878	0.199906	16	1.2094e-12	6.8328e-07	Intergenic	Intergenic	-66668	NM_053912	Cyth3
chr7	34149714	34149986	0.170896	10	1.4743e-12	8.3297e-07	Intergenic	Intergenic	120550	NM_017258	Btg1
chr3	41228468	41228631	0.399583	10	1.5668e-12	8.8523e-07	Intergenic	Intergenic	40583	NM_001108582	Dapl1
chr3	169348198	169348326	0.302805	10	1.7016e-12	9.614e-07	Intergenic	Intergenic	37057	NM_031111	Rps21
chr16	7532188	7532475	0.419752	11	2.0572e-12	1.1623e-06	Intergenic	Intergenic	-14036	NM_001107295	Oxnad1
chr14	3474588	3474697	0.276493	17	2.0997e-12	1.1863e-06	Intergenic	Intergenic	-3208	NM_001191101	Hfm1
chr1	205292593	205292656	0.190852	10	2.1599e-12	1.2204e-06	intron (NM_053809, intron 2 of 3)	-intron (NM_053809, intron 2 of 3)	353	NM_053809	Fgf4
chr4	154365368	154365508	0.176303	12	2.1837e-12	1.2338e-06	Intergenic	Intergenic	65611	NM_001106616	Csgalnact2
chr1	203244308	203244407	0.170937	10	2.2084e-12	1.2477e-06	exon (NM_031503, exon 1 of 3)	-exon (NM_031503, exon 1 of 3)	178	NM_031503	Ascl2
chr5	160987989	160988358	0.18771	15	2.5352e-12	1.4324e-06	exon (NM_001109273, exon 1 of 3)	-exon (NM_001109273, exon 1 of 3)	404	NM_001109273	Tmem51
chr20	5226343	5226579	0.216016	10	2.7753e-12	1.568e-06	Intergenic	Intergenic	14248	NM_213564	Zbtb9
chr4	26268436	26268897	0.286201	14	2.8101e-12	1.5877e-06	Intergenic	Intergenic	274244	NM_021266	Fzd1
chr14	45907157	45907303	0.188918	18	3.1597e-12	1.7852e-06	Intergenic	Intergenic	-17880	NM_001025138	Tmem156
chr4	134698383	134698563	0.171192	12	3.1748e-12	1.7937e-06	Intergenic	Intergenic	-123986	NM_001037541	Prok2
chr9	8510317	8510762	0.348373	16	3.2126e-12	1.8151e-06	intron (NM_001108788, intron 1 of 15)	-intron (NM_001108788, intron 1 of 15)	1512	NM_001108788	Foxp4
chr3	6455447	6455539	0.266645	10	3.3478e-12	1.8915e-06	Intergenic	Intergenic	22614	NM_001039034	Wdr5
chr4	79441920	79441962	0.166736	10	3.6049e-12	2.0368e-06	Intergenic	Intergenic	-226128	NM_001305047	Nfe2l3
chr9	73737635	73737950	0.387868	10	3.8827e-12	2.1937e-06	Intergenic	Intergenic	3731	NR_031831	Mir26b
chr3	11521264	11521471	0.158226	16	3.9814e-12	2.2495e-06	exon (NM_001107832, exon 1 of 7)	-exon (NM_001107832, exon 1 of 7)	154	NM_001107832	Ptges2
chr10	84994286	84994562	0.403764	10	4.4763e-12	2.5291e-06	Intergenic	Intergenic	-1524	NR_032269	Mir196c
chr10	107440298	107440596	0.166042	12	4.6598e-12	2.6328e-06	intron (NM_176856, intron 3 of 11)	-intron (NM_031837, intron 2 of 10)	-4871	NM_001113497	Sept9
chr10	13403317	13403430	0.165757	10	4.7442e-12	2.6805e-06	Intergenic	Intergenic	-9294	NM_031081	Pdpk1
chr2	57778829	57778949	0.155809	14	4.7943e-12	2.7088e-06	Intergenic	Intergenic	67475	NM_053952	Nup155
chr6	25439426	25439564	0.315736	10	4.8751e-12	2.7544e-06	promoter-TSS (NM_031855)	-promoter-TSS (NM_031855)	-998	NM_031855	Khk
chr13	47300806	47300925	0.154603	10	5.0151e-12	2.8335e-06	promoter-TSS (NM_080409)	-promoter-TSS (NM_080409)	-122	NM_080409	Ppfia4
chr1	249896473	249896658	0.208113	10	5.2254e-12	2.9523e-06	Intergenic	Intergenic	-89868	NM_001134612	Fam178a
chr3	146962531	146962657	0.156259	12	5.323e-12	3.0075e-06	promoter-TSS (NM_001106535)	-promoter-TSS (NM_001106535)	-8	NM_001106535	Aar2
chr20	2712810	2713072	0.344806	10	5.4002e-12	3.0511e-06	Intergenic	Intergenic	-41328	NM_001002821	RT1-T18
chr6	20558732	20558847	0.167479	10	5.9556e-12	3.3649e-06	intron (NM_001106706, intron 12 of 19)	-intron (NM_001106706, intron 12 of 19)	74696	NM_001106706	Ttc27
chr5	155855031	155855435	0.205686	12	6.0242e-12	3.4037e-06	Intergenic	Intergenic	-41903	NM_001191871	Zbtb40
chr10	91779786	91780237	0.194351	22	6.063e-12	3.4256e-06	Intergenic	Intergenic	33353	NM_001100728	Ccdc43
chr7	70769801	70769964	0.167914	10	6.635e-12	3.7488e-06	intron (NM_001012118, intron 1 of 3)	-intron (NM_001012118, intron 1 of 3)	760	NM_001012118	Osr2
chr15	5714625	5714890	0.150193	10	6.708e-12	3.79e-06	intron (NM_134459, intron 8 of 12)	-intron (NM_001009969_2, intron 3 of 4)	41094	NM_134459	Cd99l2
chr8	93847529	93847640	0.171009	10	7.9701e-12	4.5031e-06	exon (NM_001134531, exon 1 of 6)	-exon (NM_001134531, exon 1 of 6)	274	NM_001134531	Zfp949
chr20	43869451	43869590	0.165803	12	8.2242e-12	4.6466e-06	promoter-TSS (NM_001083966)	-promoter-TSS (NM_001083966)	-988	NM_001083966	Rev3l
chr6	10204115	10204251	0.260341	16	8.264e-12	4.6691e-06	intron (NM_023090, intron 1 of 16)	-intron (NM_023090, intron 1 of 16)	1075	NM_023090	Epas1
chr20	7384744	7384908	0.308395	10	8.406e-12	4.7494e-06	intron (NM_080782, intron 2 of 3)	-intron (NM_080782, intron 2 of 3)	8501	NM_080782	Cdkn1a
chr2	224902206	224902464	0.162272	19	8.7148e-12	4.9238e-06	Intergenic	Intergenic	-86545	NM_001044290	Larp7
chr6	59715917	59716060	0.237171	10	8.7173e-12	4.9253e-06	Intergenic	Intergenic	-358988	NM_198748	Scin
chr7	59830764	59831074	0.212681	10	8.7879e-12	4.9652e-06	Intergenic	Intergenic	-77128	NM_032070	Hmga2
chrX	143135593	143135707	0.286718	12	9.1613e-12	5.1761e-06	intron (NM_001109019, intron 2 of 2)	-intron (NM_001109019, intron 2 of 2)	6926	NM_001109019	Zic3
chr4	152251556	152251835	0.22244	11	1.0334e-11	5.8386e-06	Intergenic	Intergenic	-91934	NM_199207	Fam21c
chr13	46584369	46584583	0.1523	10	1.0836e-11	6.1221e-06	intron (NM_001047902, intron 1 of 16)	-intron (NM_001047902, intron 1 of 16)	673	NM_001047902	Zc3h11a
chr16	6870889	6871704	0.249869	16	1.1385e-11	6.4325e-06	intron (NM_054011, intron 2 of 9)	-intron (NM_054011, intron 2 of 9)	17625	NM_054011	Sh3bp5
chrX	26585650	26585960	0.174324	19	1.2272e-11	6.9335e-06	Intergenic	Intergenic	21539	NM_012764	Gata1
chr1	29709586	29709767	0.151897	12	1.2841e-11	7.2554e-06	Intergenic	Intergenic	-15194	NM_001109333	Lrrc14b
chr1	145952993	145953153	0.188174	10	1.3244e-11	7.4829e-06	promoter-TSS (NM_022623)	-promoter-TSS (NM_022623)	-670	NM_022623	Fzd4
chr20	18889742	18889983	0.204072	10	1.3663e-11	7.7196e-06	Intergenic	Intergenic	74153	NM_001012076	Phyhipl
chr17	21304665	21304820	0.326968	10	1.4285e-11	8.071e-06	intron (NM_001108409, intron 1 of 15)	-intron (NM_001108409, intron 1 of 15)	12204	NM_001108409	Fgd3
chr5	148278729	148278803	0.232856	11	1.4581e-11	8.2384e-06	Intergenic	Intergenic	-2543	NM_017122	Hpca
chr1	171094914	171095180	0.214475	10	1.5183e-11	8.5785e-06	intron (NM_024362, intron 2 of 20)	-intron (NM_024362, intron 2 of 20)	32866	NM_024362	Arntl
chr10	95574151	95574424	0.228626	10	1.5341e-11	8.6679e-06	intron (NM_182820, intron 2 of 10)	-intron (NM_182820, intron 2 of 10)	12504	NM_182820	Strada
chr13	106470833	106470957	0.157035	10	1.7821e-11	1.0069e-05	intron (NM_001107201, intron 1 of 4)	-intron (NM_001107201, intron 1 of 4)	455	NM_001107201	Prox1
chr1	42253044	42253235	0.19864	22	1.8326e-11	1.0354e-05	promoter-TSS (NM_012756)	-promoter-TSS (NM_012756)	-133	NM_012756	Igf2r
chr7	32843509	32843614	0.252741	10	2.0012e-11	1.1306e-05	Intergenic	Intergenic	-73609	NM_053598	Nudt4
chr1	29933229	29933305	0.287876	10	2.1127e-11	1.1937e-05	exon (NM_012654, exon 17 of 17)	-exon (NM_012654, exon 17 of 17)	35731	NM_001024964	Exoc3
chr14	87419817	87420000	0.39648	10	2.3267e-11	1.3146e-05	intron (NM_020100, intron 1 of 2)	-intron (NM_020100, intron 1 of 2)	2619	NM_020100	Ramp3
chr1	27505435	27505589	0.153538	12	2.3606e-11	1.3337e-05	intron (NM_130417, intron 1 of 4)	-intron (NM_130417, intron 1 of 4)	395	NM_130417	Hey2
chr20	9899447	9899648	0.205213	10	2.379e-11	1.3441e-05	intron (NM_138543, intron 17 of 17)	-intron (NM_138543, intron 17 of 17)	42503	NM_001135667	Wdr4
chr12	28948507	28948698	0.262066	10	2.4147e-11	1.3643e-05	intron (NM_001100488, intron 3 of 22)	-intron (NM_001100488, intron 3 of 22)	87888	NM_001108853	Piwil1
chr17	85917187	85917519	0.157232	10	2.4405e-11	1.3789e-05	exon (NM_147145, exon 6 of 14)	-exon (NM_147145, exon 6 of 14)	11291	NM_147145	Dclre1c
chr10	58940804	58941022	0.175565	13	2.4721e-11	1.3967e-05	Intergenic	Intergenic	45651	NM_001113781	Fam64a
chr13	86830461	86830909	0.316343	10	2.5431e-11	1.4369e-05	Intergenic	Intergenic	-7086	NM_175756	Fcgr2b
chr6	26757570	26757677	0.273291	10	2.6944e-11	1.5223e-05	Intergenic	Intergenic	-44988	NM_001003958	Dnmt3a
chr8	102142188	102142486	0.293015	12	2.7694e-11	1.5647e-05	Intergenic	Intergenic	-34719	NM_001106849	Spsb4
chr3	120150238	120150419	0.215003	10	2.8317e-11	1.5999e-05	Intergenic	Intergenic	-2797	NM_138978	Prokr2
chr4	61521751	61522142	0.162585	11	3.2115e-11	1.8145e-05	Intergenic	Intergenic	-19129	NM_001106590	Slc35b4
chr1	55213280	55213371	0.17346	20	4.2152e-11	2.3816e-05	Intergenic	Intergenic	618466	NM_001107465	Chd1
chr10	20910271	20910384	0.182646	14	4.4301e-11	2.503e-05	Intergenic	Intergenic	-164844	NM_001105777	Rars
chr5	169325515	169325852	0.181961	25	4.4436e-11	2.5106e-05	intron (NM_201272, intron 2 of 21)	-intron (NM_201272, intron 2 of 21)	-19011	NM_001137644	Tnfrsf25
chr8	127176298	127176749	0.203456	10	4.5349e-11	2.5622e-05	Intergenic	Intergenic	-17217	NM_001108195	Klhl40
chr20	4676710	4676835	0.3116	10	4.5871e-11	2.5917e-05	intron (NM_001008884, intron 2 of 5)	-intron (NM_001008884, intron 2 of 5)	4285	NM_001008884	RT1-Db1
chr12	15201842	15201921	0.203451	10	5.0576e-11	2.8576e-05	promoter-TSS (NM_001105913)	-promoter-TSS (NM_001105913)	-515	NM_001105913	Elfn1
chr7	19214773	19215071	0.152298	17	5.483e-11	3.0979e-05	intron (NM_001013952, intron 5 of 11)	-intron (NM_001013952, intron 5 of 11)	-329517	NM_017109	Syn3
chr1	42253549	42253624	0.150738	13	5.5714e-11	3.1478e-05	intron (NM_012756, intron 1 of 47)	-intron (NM_012756, intron 1 of 47)	314	NM_012756	Igf2r
chrX	159533162	159533376	0.227897	16	5.8224e-11	3.2897e-05	Intergenic	Intergenic	-4743	NM_001037973	Dusp9
chr14	111146959	111147291	0.150679	16	6.0604e-11	3.4241e-05	intron (NM_001013130, intron 2 of 36)	-intron (NM_001013130, intron 2 of 36)	70384	NM_001013130	Sptbn1
chr20	10259081	10259326	0.313518	10	6.1689e-11	3.4854e-05	Intergenic	Intergenic	32531	NM_021693	Sik1
chr16	18796755	18796950	0.292378	10	6.3119e-11	3.5662e-05	TTS (NM_001106066)	-TTS (NM_001106066)	-1292	NM_001100908	Fam129c
chr18	57038823	57039363	0.18103	11	6.5835e-11	3.7197e-05	intron (NM_031525, intron 9 of 22)	-intron (NM_031525, intron 9 of 22)	24618	NM_031525	Pdgfrb
chr12	37605631	37606176	0.315583	12	6.5846e-11	3.7203e-05	Intergenic	Intergenic	-273647	NM_139036	Lhx5
chr5	8819678	8819742	0.16433	11	6.6839e-11	3.7764e-05	Intergenic	Intergenic	46337	NM_001127569	Ppp1r42
chr1	214857333	214857511	0.150367	10	6.696e-11	3.7832e-05	Intergenic	Intergenic	36115	NM_001000244	Olr321
chr18	62967327	62967730	0.175748	10	6.704e-11	3.7877e-05	Intergenic	Intergenic	52684	NM_001008385	Pmaip1
chr12	35234158	35234563	0.275529	10	6.8399e-11	3.8645e-05	Intergenic	Intergenic	-32239	NM_001110139	Atp2a2
chr17	20268252	20268390	0.159701	18	6.9645e-11	3.9349e-05	promoter-TSS (NM_001082409)	-promoter-TSS (NM_001082409)	93	NM_001082409	Fbxw17
chr3	148440677	148440859	0.158411	10	7.1334e-11	4.0303e-05	promoter-TSS (NM_001024870)	-promoter-TSS (NM_001024870)	11	NM_001024870	Ctnnbl1
chr3	118938674	118938811	0.172126	10	7.188e-11	4.0612e-05	intron (NM_001005556, intron 1 of 6)	-intron (NM_001005556, intron 1 of 6)	310	NM_001005556	Mavs
chr10	90676403	90676555	0.270931	10	7.8156e-11	4.4158e-05	Intergenic	Intergenic	17280	NM_001105842	Rdm1
chr5	138337962	138338453	0.197353	24	8.0229e-11	4.5329e-05	promoter-TSS (NM_001134626)	-promoter-TSS (NM_001134626)	-14	NM_001134626	Ccdc24
chr16	19834613	19834738	0.18199	12	8.2278e-11	4.6487e-05	promoter-TSS (NM_001127654)	-promoter-TSS (NM_001127654)	17	NM_001127654	Tm6sf2
chr1	95077978	95078112	0.16383	13	8.994e-11	5.0816e-05	exon (NM_053997, exon 4 of 4)	-exon (NM_053997, exon 4 of 4)	11404	NM_053997	Kcnc3
chr20	47708821	47709094	0.198835	13	9.0675e-11	5.1231e-05	Intergenic	Intergenic	109393	NM_001014034	Qrsl1
chr3	146875858	146876015	0.243293	10	9.3918e-11	5.3063e-05	promoter-TSS (NM_021681)	-promoter-TSS (NM_021681)	-518	NM_172090	Epb41l1
chr12	2687239	2687427	0.173805	20	9.5684e-11	5.4061e-05	exon (NM_001109059, exon 1 of 7)	-exon (NM_001109059, exon 1 of 7)	420	NM_001109059	RGD1563425
chr11	84361379	84361513	0.171196	17	1.0525e-10	5.9465e-05	Intergenic	Intergenic	-3734	NM_053931	Sept5
chr9	90108433	90108838	0.325678	18	1.0534e-10	5.9519e-05	Intergenic	Intergenic	-4672	NM_001012135	Mlph
chr7	19279174	19279449	0.240612	10	1.0552e-10	5.9618e-05	Intergenic	Intergenic	-265127	NM_017109	Syn3
chr15	32860486	32860661	0.182653	12	1.091e-10	6.1641e-05	exon (NM_053442, exon 1 of 11)	-exon (NM_053442, exon 1 of 11)	223	NM_053442	Slc7a8
chr16	38688338	38688454	0.162341	14	1.2066e-10	6.8172e-05	Intergenic	Intergenic	947204	NM_053724_1	Glra3
chr1	60227580	60227675	0.34416	12	1.4147e-10	7.9928e-05	Intergenic	Intergenic	-44527	NM_001099489	Vom2r13
chr10	48421050	48421313	0.276283	13	1.4485e-10	8.184e-05	promoter-TSS (NM_017161)	-promoter-TSS (NM_017161)	-413	NM_017161	Adora2b
chr20	49781088	49781256	0.216732	19	1.5106e-10	8.5348e-05	Intergenic	Intergenic	-74868	NM_001108539	Hace1
chr3	120571830	120572023	0.159366	10	1.5205e-10	8.5905e-05	intron (NM_012526, intron 1 of 4)	-intron (NM_012526, intron 1 of 4)	391	NM_012526	Chgb
chr10	108762788	108762924	0.16097	10	1.5622e-10	8.8262e-05	Intergenic	Intergenic	164760	NM_153735	Nptx1
chr2	124310950	124311042	0.38674	10	1.599e-10	9.0345e-05	Intergenic	Intergenic	97304	NM_001106427	Spry1
chr17	15981293	15981448	0.153672	10	1.6251e-10	9.182e-05	Intergenic	Intergenic	-5844	NM_001024795	Rnf44
chr3	7954535	7954675	0.240548	11	1.7231e-10	9.7356e-05	intron (NM_001127563, intron 5 of 5)	-intron (NM_001127563, intron 5 of 5)	-29441	NM_057109	Barhl1
chr9	77582677	77583023	0.229264	10	1.7307e-10	9.7782e-05	Intergenic	Intergenic	-6218	NM_053710	Pax3
chr18	64711952	64712032	0.16418	10	1.7478e-10	9.875e-05	promoter-TSS (NM_001008299)	-promoter-TSS (NM_001008299)	266	NM_001007688	Fam210a
chr9	90752772	90753034	0.292293	10	1.8018e-10	0.0001018	Intergenic	Intergenic	-5790	NM_001108232	Asb1
chr2	3653308	3653402	0.150684	10	1.8037e-10	0.00010191	Intergenic	Intergenic	-471793	NM_001047917	Arsk
chr19	26840573	26841153	0.192649	13	1.871e-10	0.00010571	intron (NM_001191093, intron 1 of 6)	-intron (NM_001191093, intron 1 of 6)	121607	NM_001191093	Rnf150
chr1	83486235	83486458	0.228401	14	2.0829e-10	0.00011768	TTS (NM_133290)	-TTS (NM_133290)	2776	NM_133290	Zfp36
chr16	19084362	19084796	0.18498	10	2.1165e-10	0.00011958	Intergenic	Intergenic	-8861	NM_019313	Kcnn1
chr17	39225807	39226133	0.185046	10	2.2636e-10	0.00012789	Intergenic	Intergenic	109059	NM_022858	Foxq1
chr12	21729391	21729590	0.166713	11	2.2957e-10	0.00012971	intron (NM_001109020, intron 1 of 5)	-intron (NM_001109020, intron 1 of 5)	2070	NM_001109020	Upk3bl
chr10	74412869	74413045	0.311019	10	2.3459e-10	0.00013255	Intergenic	Intergenic	73047	NM_001100630	Ints2
chr1	79785374	79785464	0.284242	12	2.3465e-10	0.00013258	exon (NM_001047107, exon 4 of 8)	-exon (NM_001047107, exon 4 of 8)	1447	NM_001047107	Cadm4
chr8	62232569	62232689	0.153718	10	2.4979e-10	0.00014113	Intergenic	Intergenic	-65218	NM_001113791	RGD1562618
chr8	96336070	96336238	0.298803	10	2.5385e-10	0.00014342	intron (NM_001108176, intron 1 of 2)	-intron (NM_001108176, intron 1 of 2)	180	NM_001108176	Zic4
chr20	27458063	27458216	0.287108	10	2.7569e-10	0.00015576	Intergenic	Intergenic	24850	NM_053408	Chst3
chr2	229152350	229152535	0.298858	10	2.7753e-10	0.0001568	Intergenic	Intergenic	146644	NM_001106471	Papss1
chr7	123027838	123028285	0.251209	14	2.8465e-10	0.00016083	Intergenic	Intergenic	-4711	NM_001130507	Upk3a
chr10	56126141	56126244	0.169996	12	3.1582e-10	0.00017844	exon (NM_031652, exon 14 of 14)	-exon (NM_031652, exon 14 of 14)	6732	NM_031652	Kcnab3
chr14	81830973	81831130	0.218635	10	3.2151e-10	0.00018165	intron (NM_001100684, intron 1 of 12)	-intron (NM_001100684, intron 1 of 12)	-22133	NM_016990	Add1
chr3	555881	556084	0.185351	20	3.3922e-10	0.00019166	Intergenic	Intergenic	723954	NM_001024308	LOC499742
chr14	74554487	74554749	0.184295	12	3.4501e-10	0.00019493	Intergenic	Intergenic	153077	NM_053978	Rab28
chr4	119418598	119418721	0.346648	10	3.469e-10	0.00019599	Intergenic	Intergenic	-49352	NM_019181	Spr
chr10	92383775	92384137	0.179293	16	3.4708e-10	0.0001961	exon (NM_001105846, exon 25 of 25)	-exon (NM_001105846, exon 25 of 25)	20869	NM_001005531	Spata32
chr1	201134540	201135504	0.21202	19	3.6876e-10	0.00020835	intron (NM_030833, intron 1 of 1)	-intron (NM_030833, intron 1 of 1)	515	NM_030833	Ifitm2
chr9	61130312	61130363	0.214357	10	3.9247e-10	0.00022174	intron (NM_001191808, intron 20 of 22)	-intron (NM_001191808, intron 20 of 22)	-218191	NM_030869	Nrp2
chr9	6206348	6206817	0.221978	17	3.9836e-10	0.00022507	exon (NM_001135011, exon 10 of 10)	-exon (NM_001135011, exon 10 of 10)	197635	NM_001135011	Rftn1
chr1	30557214	30557480	0.192535	12	4.6034e-10	0.00026009	intron (NM_012694, intron 1 of 14)	-intron (NM_012694, intron 1 of 14)	193	NM_012694	Slc6a3
chr8	108089123	108089301	0.235263	10	4.9825e-10	0.00028151	exon (NM_022667, exon 10 of 14)	-exon (NM_022667, exon 10 of 14)	-61849	NM_001108775	Rab6b
chr6	82402700	82402783	0.176274	14	5.033e-10	0.00028436	Intergenic	Intergenic	253537	NM_001108024	Lrfn5
chr7	10910978	10911182	0.196188	10	5.0713e-10	0.00028653	exon (NM_001106769, exon 14 of 14)	-exon (NM_001106769, exon 14 of 14)	8930	NM_001106769	Apc2
chr10	90926019	90926350	0.20398	10	5.2086e-10	0.00029428	intron (NM_001108837, intron 1 of 2)	-intron (NM_001108837, intron 1 of 2)	16113	NM_001108837	Meox1
chr10	5399777	5399901	0.187789	13	5.2879e-10	0.00029876	promoter-TSS (NM_001017471)	-promoter-TSS (NM_001017471)	-166	NM_001017471	Atf7ip2
chr12	12420808	12420961	0.153833	22	5.3259e-10	0.00030091	promoter-TSS (NM_001037218)	-promoter-TSS (NM_001037218)	8	NM_001037218	Radil
chr11	76927912	76928209	0.230462	10	5.5028e-10	0.00031091	intron (NM_019221, intron 7 of 14)	-intron (NM_001127339, intron 7 of 13)	66181	NM_001127342	Tp63
chr1	263119735	263119840	0.266125	14	5.9217e-10	0.00033458	Intergenic	Intergenic	-11189	NM_001106202	Tdrd1
chr13	85926009	85926370	0.242526	10	6.0346e-10	0.00034095	Intergenic	Intergenic	60947	NM_001191930	Uap1
chr20	8652681	8652984	0.28722	13	6.4514e-10	0.0003645	intron (NM_001013073, intron 3 of 7)	-intron (NM_001013073, intron 3 of 7)	224382	NM_001013073	Btbd9
chr1	135296215	135296449	0.205966	10	7.1353e-10	0.00040314	Intergenic	Intergenic	-42096	NR_037346	Mir3597-3
chr7	11321041	11321406	0.260297	10	7.2666e-10	0.00041056	intron (NM_001106768, intron 11 of 14)	-intron (NM_001106768, intron 11 of 14)	6037	NM_001077642	Cfd
chr2	35825661	35825931	0.208041	10	7.4234e-10	0.00041942	promoter-TSS (NM_001008373)	-promoter-TSS (NM_001008373)	-60	NM_001008373	Srek1ip1
chr7	1839032	1839194	0.188866	10	7.7448e-10	0.00043758	TTS (NM_139083)	-TTS (NM_139083)	449	NM_001191090	Zc3h10
chr4	117815034	117815203	0.182875	10	7.8202e-10	0.00044184	Intergenic	Intergenic	-23720	NM_138531	Stambp
chr3	155425169	155425265	0.183495	10	8.2534e-10	0.00046632	promoter-TSS (NM_001108604)	-promoter-TSS (NM_001108604)	97	NM_001108604	Rbpjl
chr10	57300262	57300448	0.177313	10	8.3369e-10	0.00047103	promoter-TSS (NM_001105800)	-promoter-TSS (NM_001105800)	-248	NM_001105800	Zmynd15
chr5	146770364	146770647	0.187731	12	8.3631e-10	0.00047251	Intergenic	Intergenic	2110	NM_019240	Gjb3
chr4	2483019	2483195	0.183442	10	8.5705e-10	0.00048423	Intergenic	Intergenic	-7378	NM_001109214	En2
chr1	202587320	202587523	0.158174	10	8.9865e-10	0.00050773	Intergenic	Intergenic	44123	NM_134334	Ctsd
chr7	129069263	129069454	0.286979	10	9.0379e-10	0.00051064	Intergenic	Intergenic	-7087	NM_001108750	Cpne8
chr10	97234296	97234528	0.202203	10	9.1824e-10	0.0005188	Intergenic	Intergenic	-19968	NM_080692	Cacng4
chr8	113349965	113350137	0.266512	10	9.3134e-10	0.0005262	intron (NM_024352, intron 7 of 17)	-intron (NM_024352, intron 7 of 17)	1848	NM_024352	Mst1
chr9	74658876	74659048	0.242957	10	9.4399e-10	0.00053335	intron (NM_001108802, intron 1 of 40)	-intron (NM_001108802, intron 1 of 40)	6436	NM_001108802	Speg
chr14	81316188	81316398	0.189871	14	9.4486e-10	0.00053384	exon (NM_001130062, exon 6 of 9)	-exon (NM_001130062, exon 6 of 9)	23565	NM_001130062	Dok7
chr19	32158179	32158317	0.160985	10	9.4878e-10	0.00053606	promoter-TSS (NM_178330)	-promoter-TSS (NM_178330)	-113	NM_178330	Tmem184c
chrX	22706180	22706393	0.287148	12	9.6988e-10	0.00054798	Intergenic	Intergenic	-72168	NM_001191586	Bcor
chr10	77690766	77690823	0.153072	14	9.9849e-10	0.00056414	promoter-TSS (NM_012990)	-promoter-TSS (NM_012990)	76	NM_012990	Nog
chr3	170430942	170431208	0.172493	11	1.0122e-09	0.00057189	promoter-TSS (NM_031803)	-promoter-TSS (NM_031803)	-323	NM_031803	Gmeb2
chrX	127388698	127388843	0.176796	10	1.1028e-09	0.00062309	Intergenic	Intergenic	79620	NM_001173349	Rnf128
chr2	38762806	38762978	0.208382	10	1.1306e-09	0.00063878	Intergenic	Intergenic	-499089	NM_001277210	Smim15
chr1	20532611	20532829	0.299237	10	1.2699e-09	0.00071748	Intergenic	Intergenic	-40495	NM_001001801	Akap7
chr12	19570969	19571133	0.169163	16	1.5128e-09	0.00085473	promoter-TSS (NM_001105918)	-promoter-TSS (NM_001105918)	10	NM_001105918	Pop7
chr15	42542622	42542705	0.347473	12	1.5673e-09	0.0008855	Intergenic	Intergenic	-23095	NM_144730	Gata4
chr16	24948987	24949243	0.210968	10	1.63e-09	0.00092095	intron (NM_001169102, intron 1 of 6)	-intron (NM_001169102, intron 1 of 6)	605	NM_001169102	Tma16
chrX	40497138	40497429	0.159505	10	1.666e-09	0.00094128	Intergenic	Intergenic	-34688	NM_001163607	Wnk3
chr10	108062770	108062897	0.201678	10	1.6706e-09	0.00094386	Intergenic	Intergenic	-103504	NM_053565	Socs3
chr1	46904825	46904916	0.254204	12	1.7035e-09	0.00096248	Intergenic	Intergenic	40117	NM_001106209	T
chr15	105473649	105473760	0.202516	11	1.704e-09	0.00096274	intron (NM_001111064, intron 6 of 9)	-intron (NM_001111064, intron 6 of 9)	-96389	NM_053741	Rap2a
chr14	78375031	78375231	0.183227	12	1.8667e-09	0.0010547	promoter-TSS (NM_001107224)	-promoter-TSS (NM_001107224)	-445	NM_001107224	Stk32b
chr9	33197130	33197215	0.153725	10	1.9425e-09	0.0010975	promoter-TSS (NM_001013111)	-promoter-TSS (NM_001013111)	-351	NM_001013111	Ptpn18
chr3	163628328	163628429	0.368562	12	1.9606e-09	0.0011078	Intergenic	Intergenic	169096	NM_201420	Tfap2c
chr1	208490617	208490774	0.229009	10	1.9781e-09	0.0011176	exon (NM_001008348, exon 11 of 11)	-exon (NM_001008348, exon 11 of 11)	19251	NM_001008348	Frmd8
chr2	1454024	1454162	0.232329	14	1.9812e-09	0.0011194	intron (NM_030836, intron 1 of 17)	-intron (NM_030836, intron 1 of 17)	215	NM_030836	Erap1
chr3	7518912	7519003	0.233646	12	2.0058e-09	0.0011333	intron (NM_019250, intron 1 of 17)	-intron (NM_019250, intron 1 of 17)	2904	NM_019250	Ralgds
chr7	18655946	18656136	0.22163	10	2.0347e-09	0.0011496	Intergenic	Intergenic	41092	NM_001127573_1	LOC689226
chr11	80736222	80736448	0.374495	10	2.0854e-09	0.0011783	intron (NM_013126, intron 21 of 25)	-intron (NM_013126, intron 21 of 25)	-109951	NM_001107082	Etv5
chr1	249799360	249799504	0.366559	10	2.1061e-09	0.00119	Intergenic	Intergenic	-4623	NM_001106361	Pax2
chr9	41889943	41890083	0.328945	10	2.1089e-09	0.0011915	Intergenic	Intergenic	16390	NM_138837	Pou3f3
chr19	16455369	16455689	0.29508	13	2.1342e-09	0.0012058	Intergenic	Intergenic	110350	NM_001107413	Irx3
chr4	173184191	173184350	0.235457	10	2.2078e-09	0.0012474	Intergenic	Intergenic	-1084	NM_012574	Grin2b
chr9	38131983	38132426	0.242015	12	2.2168e-09	0.0012525	Intergenic	Intergenic	-123157	NM_001108214	Npas2
chr9	105645474	105645717	0.160804	11	2.2356e-09	0.0012631	promoter-TSS (NM_013017)	-promoter-TSS (NM_013017)	-522	NM_013017	Rab12
chr11	66547669	66547793	0.151585	10	2.3241e-09	0.0013131	exon (NM_001024766, exon 1 of 1)	-exon (NM_001024766, exon 1 of 1)	136	NM_001024766	Wdr5b
chr20	45220751	45220840	0.277524	11	2.4485e-09	0.0013834	intron (NM_001047096, intron 3 of 22)	-intron (NM_001047096, intron 3 of 22)	27999	NM_001047096	Fig4
chr12	25801420	25801767	0.325917	12	2.4666e-09	0.0013936	Intergenic	Intergenic	-492686	NM_001025112	Wbscr17
chr13	68437635	68437733	0.199097	10	2.4824e-09	0.0014026	exon (NM_001105961, exon 1 of 10)	-exon (NM_001105961, exon 1 of 10)	241	NM_001105961	Shcbp1l
chr1	79595623	79595817	0.286371	10	2.485e-09	0.001404	intron (NM_001192010, intron 3 of 4)	-intron (NM_001192010, intron 3 of 4)	4204	NM_001192010	Lypd5
chr9	61921991	61922234	0.253587	11	2.5736e-09	0.0014541	Intergenic	Intergenic	-83245	NM_012961	Gpr1
chr14	101388828	101388985	0.165121	10	2.6057e-09	0.0014722	intron (NM_001024903, intron 1 of 1)	-intron (NM_001024903, intron 1 of 1)	16094	NM_001024903	Sertad2
chr20	6809359	6809436	0.292193	10	2.702e-09	0.0015266	Intergenic	Intergenic	-4658	NM_001013906	Lhfpl5
chr19	51898592	51898799	0.29711	12	2.7086e-09	0.0015304	Intergenic	Intergenic	51509	NM_022867	Map1lc3b
chr3	142666488	142666619	0.185214	12	2.7887e-09	0.0015756	exon (NM_144755, exon 3 of 4)	-exon (NM_144755, exon 3 of 4)	3581	NM_144755	Trib3
chr20	2730190	2730319	0.155249	20	2.7966e-09	0.0015801	Intergenic	Intergenic	-24014	NM_001002821	RT1-T18
chr2	226598002	226598174	0.287732	10	2.8307e-09	0.0015993	intron (NM_019334, intron 3 of 3)	-intron (NM_001042505, intron 2 of 2)	2134	NM_001042505	Pitx2
chr19	19375390	19375607	0.245024	10	2.9268e-09	0.0016536	Intergenic	Intergenic	96616	NM_001107415	Sall1
chr10	89084699	89084892	0.168377	10	2.9666e-09	0.0016761	intron (NM_199498, intron 1 of 5)	-intron (NM_199498, intron 1 of 5)	874	NM_199498	Krt19
chr17	2272874	2272952	0.509999	10	2.9913e-09	0.0016901	Intergenic	Intergenic	882019	NM_001107331	Irx1
chr18	11933466	11933516	0.197037	10	3.0332e-09	0.0017137	intron (NM_001033688, intron 1 of 14)	-intron (NM_001033688, intron 1 of 14)	498	NM_001033688	Dsc2
chr1	83481925	83482039	0.15179	10	3.0841e-09	0.0017425	exon (NM_001134972, exon 1 of 19)	-exon (NM_001134972, exon 1 of 19)	617	NM_001134972	Plekhg2
chr6	132621745	132621982	0.168073	11	3.1051e-09	0.0017544	Intergenic	Intergenic	74806	NM_001109672	Ccnk
chr5	167100711	167101111	0.193396	21	3.1898e-09	0.0018022	intron (NM_001106698, intron 3 of 4)	-intron (NM_001106698, intron 3 of 4)	24387	NM_001106698	H6pd
chr5	148656803	148656890	0.253366	10	3.3245e-09	0.0018783	Intergenic	Intergenic	9120	NM_001109266	Fam229a
chr4	184005227	184005412	0.190824	10	3.4806e-09	0.0019665	intron (NM_031046, intron 2 of 56)	-intron (NM_031046, intron 2 of 56)	60810	NM_031046	Itpr2
chr8	55085502	55085680	0.184757	13	3.5699e-09	0.002017	intron (NM_213629, intron 1 of 14)	-intron (NM_213629, intron 1 of 14)	262	NM_213629	Arhgap20
chr2	233113756	233113864	0.254124	12	3.8323e-09	0.0021653	exon (NM_001276711, exon 13 of 25)	-exon (NM_001276711, exon 13 of 25)	97381	NM_001276711	Nfkb1
chr7	9761917	9762120	0.258245	10	3.8729e-09	0.0021882	Intergenic	Intergenic	-6116	NM_031567	Nfic
chr18	73824690	73824796	0.18646	13	4.0009e-09	0.0022605	Intergenic	Intergenic	-71275	NM_001014151	Hdhd2
chr13	109007809	109007961	0.160206	10	4.027e-09	0.0022753	exon (NM_001103357, exon 1 of 2)	-exon (NM_001103357, exon 1 of 2)	139	NM_001103357	LOC100125367
chr7	142227138	142227369	0.209046	10	4.0428e-09	0.0022841	intron (NM_001135089, intron 3 of 7)	-intron (NM_001109470, intron 3 of 7)	-7250	NM_001109509	Gpr84
chr8	45313986	45314145	0.275082	13	4.0778e-09	0.002304	intron (NM_001106814, intron 20 of 23)	-intron (NM_001106814, intron 20 of 23)	69524	NM_001106814	Tecta
chr19	10320465	10320549	0.159012	10	4.0994e-09	0.0023162	Intergenic	Intergenic	-15282	NM_001103352	Kifc3
chr6	129879713	129879913	0.153148	10	4.1071e-09	0.0023205	intron (NM_001108055, intron 4 of 17)	-intron (NM_001108055, intron 4 of 17)	18314	NM_001108055	Ak7
chr1	8091230	8091625	0.239454	10	4.273e-09	0.0024142	intron (NM_214458, intron 1 of 11)	-intron (NM_214458, intron 1 of 11)	11239	NM_214458	Phactr2
chr3	161265206	161265349	0.17306	10	4.4914e-09	0.0025376	Intergenic	Intergenic	-104100	NM_001107813	Zfp217
chr13	107317016	107317193	0.163019	18	4.5227e-09	0.0025553	Intergenic	Intergenic	60196	NM_001002851	Nenf
chr12	34231162	34231254	0.270786	10	4.5815e-09	0.0025885	promoter-TSS (NM_001170396)	-promoter-TSS (NM_001170396)	29	NM_001170396	Lrrc43
chr13	105294178	105294425	0.356507	10	4.6026e-09	0.0026005	Intergenic	Intergenic	-138597	NM_001107199	Kctd3
chr7	10880430	10880714	0.243776	18	4.6162e-09	0.0026081	TTS (NM_001108071)	-TTS (NM_001108071)	5986	NM_001108071	Adamtsl5
chr3	142011624	142011855	0.301235	13	4.8973e-09	0.002767	Intergenic	Intergenic	-50043	NM_001106525	Snph
chr6	115298375	115298627	0.204655	10	5.0385e-09	0.0028467	intron (NM_001135874, intron 3 of 5)	-intron (NM_001135874, intron 3 of 5)	70628	NM_001135874	Ston2
chr4	88359201	88359562	0.167725	33	5.2593e-09	0.0029715	Intergenic	Intergenic	-427932	NM_001100862	Fam13a
chr1	68082462	68082545	0.268178	12	5.4351e-09	0.0030708	exon (NM_001108467, exon 5 of 19)	-exon (NM_001108467, exon 5 of 19)	4881	NM_001108467	Eps8l1
chr3	105781339	105781662	0.22137	10	5.8825e-09	0.0033236	Intergenic	Intergenic	14268	NM_138542	Rhov
chr18	70755492	70755901	0.173502	10	6.1183e-09	0.0034568	promoter-TSS (NM_019319)	-promoter-TSS (NM_019319)	-576	NM_019319	Mapk4
chr15	2932394	2932627	0.255308	10	6.2824e-09	0.0035495	Intergenic	Intergenic	283809	NM_001108368	Dupd1
chr7	9787199	9787376	0.236686	10	6.4227e-09	0.0036288	exon (NM_031567, exon 6 of 10)	-exon (NM_031567, exon 6 of 10)	19153	NM_031567	Nfic
chr2	52065750	52065950	0.177103	10	6.435e-09	0.0036358	Intergenic	Intergenic	-221216	NM_001100698	Zfp131
chr5	136834514	136834722	0.158298	12	6.6446e-09	0.0037542	promoter-TSS (NM_001035001)	-promoter-TSS (NM_001035001)	1	NM_001035001	Tmem69
chr5	25229389	25229620	0.227605	10	6.6984e-09	0.0037846	promoter-TSS (NM_001127564)	-promoter-TSS (NM_001127564)	-326	NM_001127564	Esrp1
chr13	70018386	70018841	0.202796	10	6.9037e-09	0.0039006	Intergenic	Intergenic	42296	NM_001025137	Ier5
chr6	6867436	6867903	0.188314	10	6.9564e-09	0.0039303	Intergenic	Intergenic	-6018	NM_001106704	Cox7a2l
chr2	252240069	252240136	0.199595	10	7.5111e-09	0.0042438	promoter-TSS (NM_001012219)	-promoter-TSS (NM_001012219)	-991	NM_001012219	Lhx8
chr10	97219137	97219354	0.205112	10	7.5386e-09	0.0042593	Intergenic	Intergenic	-4802	NM_080692	Cacng4
chr1	95809653	95809920	0.268041	12	7.6023e-09	0.0042953	exon (NM_001270985, exon 30 of 30)	-exon (NM_001270985, exon 30 of 30)	4644	NM_181369	Hrc
chr13	105155611	105155716	0.193527	13	8.0264e-09	0.0045349	promoter-TSS (NM_001107199)	-promoter-TSS (NM_001107199)	41	NM_001107199	Kctd3
chr2	179225146	179225292	0.309591	11	8.3256e-09	0.004704	Intergenic	Intergenic	-56034	NM_207606	Kirrel
chr1	246287004	246287373	0.217665	14	9.0676e-09	0.0051232	intron (NM_001191898, intron 9 of 20)	-intron (NM_001191898, intron 9 of 20)	-34894	NM_001017386	Opalin
chr2	203496249	203496572	0.228088	10	9.11e-09	0.0051471	intron (NM_031154, intron 2 of 7)	-intron (NM_031154, intron 2 of 7)	401	NM_031154	Gstm7
chr19	20086430	20086930	0.251413	12	9.3798e-09	0.0052996	Intergenic	Intergenic	-12819	NM_053396	Adcy7
chr7	112867722	112867828	0.215675	11	9.9152e-09	0.0056021	promoter-TSS (NM_001130546)	-promoter-TSS (NM_001130546)	-6	NM_001130546	Lynx1
chr3	161226027	161226130	0.215642	10	9.9171e-09	0.0056031	Intergenic	Intergenic	-64901	NM_001107813	Zfp217
chr2	61340027	61340123	0.166363	10	9.959e-09	0.0056268	intron (NM_012868, intron 1 of 7)	-intron (NM_012868, intron 1 of 7)	1385	NM_012868	Npr3
chr5	120328287	120328453	0.150346	12	1.0139e-08	0.0057285	Intergenic	Intergenic	-75716	NM_001033709	Alg6
chr1	207937684	207937795	0.200828	10	1.0598e-08	0.0059881	exon (NM_001024290, exon 3 of 3)	-exon (NM_001024290, exon 3 of 3)	9092	NM_001024290	Gal3st3
chr9	58063874	58063991	0.161155	20	1.0649e-08	0.0060164	exon (NM_001271185, exon 1 of 1)	-exon (NM_001271185, exon 1 of 1)	193	NM_001271185	LOC100360552
chr3	164391394	164391599	0.280921	13	1.0993e-08	0.0062111	Intergenic	Intergenic	-15898	NM_001109542	LOC689618
chr7	9939947	9940194	0.162264	10	1.2114e-08	0.0068441	TTS (NM_001106770)	-TTS (NM_001106770)	3468	NM_001106770	Mrpl54
chr1	184665462	184665938	0.238791	10	1.2977e-08	0.0073319	promoter-TSS (NM_001012469)	-promoter-TSS (NM_001012469)	-37	NM_001012469	Il21r
chr1	204745749	204746064	0.301931	10	1.3372e-08	0.0075551	intron (NM_201350, intron 15 of 21)	-intron (NM_001004133, intron 2 of 9)	22967	NM_001004133	Shank2
chr3	141799099	141799244	0.185322	10	1.3561e-08	0.007662	promoter-TSS (NM_031981)	-promoter-TSS (NM_031981)	-114	NM_031981	Nsfl1c
chr10	45431391	45431615	0.187311	10	1.3579e-08	0.0076723	Intergenic	Intergenic	36803	NM_001108827_1	Iba57
chr12	12319652	12319828	0.35451	10	1.4536e-08	0.0082128	intron (NM_001007615, intron 2 of 11)	-intron (NM_001007615, intron 2 of 11)	15253	NM_001007615	Wipi2
chr15	58956869	58957146	0.257751	10	1.4636e-08	0.0082695	Intergenic	Intergenic	-19155	NM_001106050	Dnajc15
chr17	47273814	47274114	0.159247	10	1.5105e-08	0.0085343	exon (NM_001197023, exon 3 of 21)	-exon (NM_001197023, exon 3 of 21)	13276	NM_001197023	RGD1307443
chr6	21453578	21453768	0.151285	10	1.5941e-08	0.0090064	exon (NM_022711, exon 1 of 6)	-exon (NM_022711, exon 1 of 6)	152	NM_022711	Srd5a2
chr12	43001081	43001219	0.206899	11	1.5956e-08	0.0090151	intron (NM_001009682, intron 4 of 5)	-intron (NM_001009682, intron 4 of 5)	8188	NM_001009682	Oasl2
chr19	32260964	32261131	0.163894	16	1.5986e-08	0.0090319	promoter-TSS (NM_001109501)	-promoter-TSS (NM_001109501)	-723	NM_001109501	Arhgap10
chrX	26933375	26933530	0.160025	10	1.6761e-08	0.0094697	intron (NM_053701, intron 5 of 50)	-intron (NM_053701, intron 5 of 50)	3712	NM_053701	Cacna1f
chr3	10587940	10588235	0.211199	12	1.7671e-08	0.0099842	intron (NM_013157, intron 3 of 13)	-intron (NM_013157, intron 3 of 13)	7307	NM_013157	Ass1
chr6	132359886	132360075	0.189439	13	1.7849e-08	0.010085	intron (NM_001277287, intron 2 of 3)	-intron (NM_001277287, intron 2 of 3)	23724	NM_001277287	Bcl11b
chr16	70905209	70905398	0.209516	12	1.7981e-08	0.010159	intron (NM_024146, intron 1 of 16)	-intron (NM_024146, intron 1 of 16)	4741	NM_024146	Fgfr1
chr12	37248682	37248992	0.241975	10	1.8006e-08	0.010173	exon (NM_001017488, exon 2 of 16)	-exon (NM_001017488, exon 2 of 16)	1861	NM_001017488	Slc8b1
chr7	10879825	10879996	0.192395	12	1.8283e-08	0.01033	TTS (NM_001108071)	-TTS (NM_001108071)	5325	NM_001108071	Adamtsl5
chr5	59150081	59150180	0.215719	10	1.8782e-08	0.010612	exon (NM_001173981, exon 4 of 7)	-exon (NM_001173981, exon 4 of 7)	-2711	NM_001108659	Dctn3
chr1	42252881	42253030	0.242606	12	1.9467e-08	0.010999	promoter-TSS (NM_012756)	-promoter-TSS (NM_012756)	-317	NM_012756	Igf2r
chr7	9949651	9949774	0.159155	10	2.0274e-08	0.011455	Intergenic	Intergenic	-3889	NM_021859	Matk
chr13	72321033	72321151	0.260458	10	2.0678e-08	0.011683	Intergenic	Intergenic	213110	NM_001107188	Rasal2
chr8	96334502	96334953	0.165256	12	2.0931e-08	0.011826	Intergenic	Intergenic	-1246	NM_001108176	Zic4
chr15	2355621	2355742	0.234372	12	2.1291e-08	0.01203	exon (NM_001107250, exon 2 of 2)	-exon (NM_001107250, exon 2 of 2)	2771	NM_001107250	Zfp503
chr14	43180632	43180746	0.260591	10	2.1462e-08	0.012126	promoter-TSS (NM_001109087)	-promoter-TSS (NM_001109087)	-631	NM_001109087	Shisa3
chr6	9090669	9090800	0.272508	12	2.1572e-08	0.012188	Intergenic	Intergenic	7238	NM_001191908	Six2
chr5	135263889	135264094	0.186795	15	2.1573e-08	0.012189	Intergenic	Intergenic	22556	NM_134339	Foxe3
chr10	107600222	107600642	0.25785	10	2.2371e-08	0.01264	Intergenic	Intergenic	155114	NM_001113497	Sept9
chr7	94672019	94672536	0.188359	10	2.4574e-08	0.013884	exon (NM_001134842, exon 20 of 22)	-exon (NM_001134842, exon 20 of 22)	-20620	NM_001130576	Fam83a
chr1	68005256	68005389	0.192588	11	2.4676e-08	0.013942	promoter-TSS (NM_019350)	-promoter-TSS (NM_019350)	-14	NM_019350	Syt5
chr7	115683946	115684105	0.285777	10	2.4909e-08	0.014073	intron (NM_013194, intron 35 of 39)	-intron (NM_001305877, intron 36 of 40)	31700	NM_001134801	RGD1309808
chr1	86100155	86100733	0.234396	12	2.5281e-08	0.014284	Intergenic	Intergenic	-1076	NM_031648	Fxyd1
chr1	79784850	79784963	0.302657	14	2.5934e-08	0.014652	intron (NM_001047107, intron 3 of 7)	-intron (NM_001047107, intron 3 of 7)	935	NM_001047107	Cadm4
chr17	30515126	30515317	0.290041	10	2.8014e-08	0.015828	Intergenic	Intergenic	497642	NM_001107345	Tfap2a
chr1	179660227	179660472	0.150754	13	2.8097e-08	0.015874	Intergenic	Intergenic	-52054	NM_012947	Eef2k
chr17	79955445	79955636	0.175779	10	2.826e-08	0.015967	Intergenic	Intergenic	-36046	NM_133293	Gata3
chr17	49018864	49018963	0.311692	10	2.8592e-08	0.016154	Intergenic	Intergenic	40865	NM_001135084	Zfp322a
chr7	59701668	59702215	0.160786	24	2.8848e-08	0.016299	intron (NM_032070, intron 4 of 5)	-intron (NM_032070, intron 4 of 5)	51849	NM_032070	Hmga2
chr12	42684054	42684332	0.234781	10	2.8997e-08	0.016383	Intergenic	Intergenic	-12190	NM_001033676	Cabp1
chr11	87373143	87373303	0.247228	12	2.9056e-08	0.016417	Intergenic	Intergenic	157399	NM_183052	Ube2v2
chr6	130131432	130131597	0.157489	10	2.9235e-08	0.016518	Intergenic	Intergenic	-50095	NM_001012194	Vrk1
chr10	46798880	46799630	0.176606	10	2.9821e-08	0.016849	Intergenic	Intergenic	-11950	NM_001191643	Alkbh5
chr1	232609915	232610117	0.270416	16	3.0971e-08	0.017498	Intergenic	Intergenic	-7611	NM_001014165	Spata6l
chr16	19142097	19142217	0.290628	12	3.1035e-08	0.017535	Intergenic	Intergenic	-4573	NM_001170604	Il12rb1
chr16	19347297	19347516	0.238428	12	3.1826e-08	0.017982	exon (NM_001013880, exon 4 of 11)	-exon (NM_001013880, exon 4 of 11)	734	NM_001013880	Isyna1
chr10	83636569	83636925	0.201509	16	3.5558e-08	0.02009	exon (NM_053304, exon 48 of 51)	-exon (NM_053304, exon 48 of 51)	14309	NM_053304	Col1a1
chr1	77277903	77278241	0.153233	10	3.6602e-08	0.02068	exon (NM_001107481, exon 1 of 1)	-exon (NM_001107481, exon 1 of 1)	730	NM_001107481	Pnmal2
chr1	95632544	95632898	0.150423	11	3.698e-08	0.020894	intron (NM_001024868, intron 1 of 8)	-intron (NM_001024868, intron 1 of 8)	509	NM_001024868	Pih1d1
chr12	38611340	38611638	0.199469	16	3.844e-08	0.021718	Intergenic	Intergenic	-444819	NM_181638	Tbx3
chr10	16833426	16833919	0.178206	10	3.8598e-08	0.021808	Intergenic	Intergenic	-69094	NM_053578	Atp6v0e1
chr7	1055319	1055451	0.262764	10	3.8715e-08	0.021874	Intergenic	Intergenic	82282	NM_173305	Hsd17b6
chr3	18959401	18959693	0.200388	10	3.8721e-08	0.021877	Intergenic	Intergenic	38249	NM_133589	Ppp6c
chr12	16039163	16039474	0.277752	12	3.9145e-08	0.022117	intron (NM_001033679, intron 3 of 9)	-intron (NM_001033679, intron 3 of 9)	13452	NM_001033679	Prkar1b
chr3	161174320	161174452	0.150932	10	4.077e-08	0.023035	Intergenic	Intergenic	-13208	NM_001107813	Zfp217
chr8	124063229	124063353	0.156052	10	4.2127e-08	0.023802	Intergenic	Intergenic	-11098	NM_017035	Plcd1
chr1	203383144	203383227	0.296068	10	4.2712e-08	0.024132	promoter-TSS (NM_032073)	-promoter-TSS (NM_032073)	-215	NM_032073	Kcnq1
chr11	73763262	73763515	0.176907	12	4.3993e-08	0.024856	intron (NM_001109056, intron 1 of 1)	-intron (NM_001109056, intron 1 of 1)	30148	NM_001109056	Mb21d2
chr8	21554943	21555075	0.187061	10	4.4114e-08	0.024924	Intergenic	Intergenic	240969	NM_001108756	Rp9
chr7	67300063	67300471	0.167203	10	4.4271e-08	0.025013	Intergenic	Intergenic	-2806	NM_001191910	Gli1
chr6	77008936	77009183	0.182071	10	4.4633e-08	0.025218	intron (NM_001106732, intron 1 of 1)	-intron (NM_001106732, intron 1 of 1)	597	NM_001106732	Nkx2-8
chr1	78875997	78876200	0.216682	22	4.521e-08	0.025544	Intergenic	Intergenic	10390	NM_001107482	Ppp1r37
chr19	50375520	50375745	0.318454	10	4.5324e-08	0.025608	exon (NM_138518, exon 14 of 14)	-exon (NM_138518, exon 14 of 14)	47587	NM_133394	Zdhhc7
chr12	42537576	42537769	0.18658	13	4.6595e-08	0.026326	promoter-TSS (NM_001108339)	-promoter-TSS (NM_001108339)	475	NM_001126099	Triap1
chr10	108946084	108946505	0.169771	14	4.7468e-08	0.026819	Intergenic	Intergenic	-18679	NM_153735	Nptx1
chr5	143980394	143980664	0.156476	13	4.8714e-08	0.027523	Intergenic	Intergenic	-1018	NM_138838	Pou3f1
chr18	76977286	76977601	0.249419	10	4.9233e-08	0.027817	intron (NM_001100973, intron 2 of 2)	-intron (NM_001100973, intron 2 of 2)	35159	NM_001100973	Pard6g
chr1	211497723	211498095	0.225211	12	5.1384e-08	0.029032	intron (NM_001305220, intron 11 of 13)	-intron (NM_001305220, intron 11 of 13)	10318	NM_001305220	Hnrnpul2
chr4	80479974	80480206	0.232806	12	5.3038e-08	0.029966	Intergenic	Intergenic	-15163	NM_012581	Hoxa2
chr1	44731346	44731577	0.17367	10	5.3369e-08	0.030153	intron (NM_001077677, intron 4 of 4)	-intron (NM_001077677, intron 4 of 4)	-190696	NM_001115021	Qk
chr4	177437442	177437641	0.192479	10	5.9088e-08	0.033384	Intergenic	Intergenic	-178408	NM_139340	Plekha5
chr1	140061853	140062033	0.234357	10	6.069e-08	0.03429	promoter-TSS (NM_001100581)	-promoter-TSS (NM_001100581)	-53	NM_001100581	RGD1310371
chr3	156764164	156764395	0.255802	10	6.1755e-08	0.034891	intron (NM_130427, intron 4 of 14)	-intron (NM_130427, intron 4 of 14)	32790	NM_130427	Eya2
chr12	28987116	28987289	0.182355	10	6.2079e-08	0.035074	intron (NM_001100488, intron 15 of 22)	-intron (NM_001100488, intron 15 of 22)	49288	NM_001108853	Piwil1
chr7	9702425	9702597	0.160615	10	6.2682e-08	0.035415	exon (NM_001014082, exon 8 of 14)	-exon (NM_001014082, exon 8 of 14)	6560	NM_001014082	Ncln
chr14	25821611	25821684	0.201989	10	6.324e-08	0.035731	intron (NM_024367, intron 7 of 16)	-intron (NM_001169137, intron 8 of 18)	297478	NM_024367	Epha5
chr5	153426494	153426774	0.287187	10	6.3681e-08	0.03598	intron (NM_001108687, intron 1 of 11)	-intron (NM_001108687, intron 1 of 11)	33152	NM_001108687	Man1c1
chr1	85260333	85260407	0.309825	11	6.5798e-08	0.037176	promoter-TSS (NM_001009283)	-promoter-TSS (NM_001009283)	-778	NM_001009283	Syne4
chr1	137099595	137099966	0.273576	10	6.8516e-08	0.038712	intron (NM_001109149, intron 1 of 2)	-intron (NM_001109149, intron 1 of 2)	426	NM_001109149	Nmb
chr10	17419342	17419568	0.174486	10	6.9047e-08	0.039012	intron (NM_019206, intron 2 of 20)	-intron (NM_019206, intron 2 of 20)	40210	NM_019206	Stk10
chr18	31167242	31167598	0.201939	10	7.0277e-08	0.039706	Intergenic	Intergenic	-11372	NM_199493	RGD735029
chr20	2645927	2646105	0.156556	13	7.0357e-08	0.039752	Intergenic	Intergenic	-2992	NM_001044283	Snx3
chr9	90277626	90277777	0.167001	10	7.5102e-08	0.042432	Intergenic	Intergenic	-1189	NM_001014269	Lrrfip1
chr18	30640261	30640369	0.255512	10	7.8934e-08	0.044597	intron (NM_001037156, intron 1 of 2)	-intron (NM_001014773, intron 1 of 2)	5282	NM_001037156	Pcdhga8
chr14	6071941	6072045	0.223219	10	8.2245e-08	0.046468	Intergenic	Intergenic	-25956	NM_001177909	LOC100366030
chr2	197254401	197254959	0.270672	10	8.3574e-08	0.047219	intron (NM_001109584, intron 5 of 7)	-intron (NM_001109584, intron 5 of 7)	41341	NM_001109584	Vangl1
chr3	135846563	135846720	0.201073	12	8.5135e-08	0.048101	Intergenic	Intergenic	-6679	NM_001191904	Nkx2-2
chr7	11477169	11477313	0.165356	10	8.7103e-08	0.049213	exon (NM_001106766, exon 3 of 21)	-exon (NM_001106766, exon 3 of 21)	2776	NM_001106766	Polrmt
chr12	28810898	28811101	0.264008	14	8.9288e-08	0.050447	intron (NM_001100488, intron 1 of 22)	-intron (NM_001100488, intron 1 of 22)	1013	NM_001100488	Rimbp2
chr10	98899837	98900033	0.285939	10	8.9668e-08	0.050662	promoter-TSS (NM_001014121)	-promoter-TSS (NM_001014121)	-96	NM_001014121	Amz2
chr19	35104583	35104724	0.166859	10	9.2808e-08	0.052436	promoter-TSS (NM_001044292)	-promoter-TSS (NM_001044292)	-93	NM_001044292	Kiaa0895l
chr7	67033108	67033256	0.16203	10	9.31e-08	0.052601	intron (NM_023026, intron 1 of 18)	-intron (NM_023026, intron 1 of 18)	1882	NM_023026	Agap2
chr3	57354829	57355139	0.162912	19	9.6973e-08	0.05479	intron (NM_001271038, intron 1 of 2)	-intron (NM_001271038, intron 1 of 2)	3864	NM_001271038	Hoxd3
chr3	78058535	78058620	0.216174	13	9.8235e-08	0.055503	intron (NM_001106553, intron 1 of 3)	-intron (NM_001106553, intron 1 of 3)	862	NM_001106553	Alx4
chr1	79784573	79784846	0.185451	15	1.0141e-07	0.057299	intron (NM_001047107, intron 2 of 7)	-intron (NM_001047107, intron 2 of 7)	738	NM_001047107	Cadm4
chr14	18679460	18679637	0.158259	10	1.0197e-07	0.057611	promoter-TSS (NM_053647)	-promoter-TSS (NM_053647)	-374	NM_053647	Cxcl2
chr3	10762478	10763167	0.22334	10	1.0592e-07	0.059846	Intergenic	Intergenic	-24162	NM_001108952	Exosc2
chr3	164429459	164429661	0.308855	12	1.0826e-07	0.061167	Intergenic	Intergenic	22165	NM_001109542	LOC689618
chr10	12790414	12790788	0.282415	10	1.107e-07	0.062547	Intergenic	Intergenic	-37861	NM_214831	Olr1382
chr15	57501323	57501898	0.231783	15	1.135e-07	0.064127	exon (NM_001109912, exon 3 of 3)	-exon (NM_001109912, exon 3 of 3)	2037	NM_013043	Tsc22d1
chr18	17615505	17615651	0.188599	13	1.1372e-07	0.06425	Intergenic	Intergenic	-1167	NM_001107400	Celf4
chr1	76486021	76486122	0.28589	12	1.1414e-07	0.064488	intron (NM_078619, intron 3 of 7)	-intron (NM_078619, intron 3 of 7)	12134	NM_078619	Slc8a2
chr17	92212950	92213100	0.211639	12	1.1763e-07	0.066461	Intergenic	Intergenic	-33441	NM_001012162	Mllt10
chr1	246704115	246704267	0.178568	11	1.1934e-07	0.067424	Intergenic	Intergenic	-94543	NM_001106368_1	Pik3ap1
chr17	96952169	96952292	0.204175	16	1.2553e-07	0.070925	Intergenic	Intergenic	193597	NM_053682	Yme1l1
chr12	15530123	15530368	0.223773	10	1.2722e-07	0.071881	Intergenic	Intergenic	50816	NM_017179	Uncx
chr16	81458500	81458663	0.250056	10	1.3153e-07	0.074314	intron (NM_053951, intron 1 of 30)	-intron (NM_053951, intron 1 of 30)	11184	NM_053951	Mcf2l
chr12	42357301	42357713	0.200746	13	1.326e-07	0.07492	intron (NM_001012147, intron 1 of 9)	-intron (NM_001012147, intron 1 of 9)	13000	NM_001012147	Pxn
chr2	201254334	201254526	0.180832	12	1.3759e-07	0.077736	Intergenic	Intergenic	47619	NM_001008771	Wdr77
chr7	9490097	9490200	0.231328	11	1.4351e-07	0.081085	Intergenic	Intergenic	42285	NM_001139487	LOC100125368
chr12	46751450	46751534	0.182018	10	1.4539e-07	0.082144	Intergenic	Intergenic	29361	NM_001135840	Gtpbp6
chr2	211856192	211856413	0.185633	10	1.5106e-07	0.085348	promoter-TSS (NM_017301)	-promoter-TSS (NM_017301)	-792	NM_017301	S1pr1
chr9	74116276	74116452	0.287618	10	1.6427e-07	0.092811	intron (NM_001108226, intron 3 of 3)	-intron (NM_001108226, intron 3 of 3)	-8039	NM_001108227	Wnt10a
chr3	4618088	4618155	0.170022	12	1.6621e-07	0.09391	promoter-TSS (NM_001276417)	-promoter-TSS (NM_001276417)	-665	NM_001276417	Sec16a
chr5	136392972	136393113	0.296367	10	1.6727e-07	0.094508	Intergenic	Intergenic	30713	NM_001109263	Lurap1
chr7	114327293	114327401	0.237278	10	1.7229e-07	0.097341	TTS (NM_001304747)	-TTS (NM_001304747)	2860	NM_001304747	Smpd5
chr19	52366334	52366679	0.243551	14	1.7486e-07	0.098797	Intergenic	Intergenic	-160207	NM_001242627	Zfpm1
chr5	170813263	170813841	0.2436	12	1.7524e-07	0.099009	intron (NM_001191063, intron 11 of 11)	-intron (NM_001191063, intron 11 of 11)	-1132	NM_001163723	Smim1
chr2	200920555	200920881	0.158674	10	1.7629e-07	0.099605	exon (NM_001270962, exon 7 of 8)	-exon (NM_001270962, exon 7 of 8)	17258	NM_001191711	Ddx20
chrX	160682494	160682645	0.277251	10	1.888e-07	0.10667	Intergenic	Intergenic	-212387	NM_001000264	Olr1768
chr7	140029401	140029549	0.197398	10	1.8916e-07	0.10687	promoter-TSS (NM_001007659)	-promoter-TSS (NM_001007659)	-316	NM_001271114	Atg101
chr1	201651975	201652130	0.194113	10	1.8936e-07	0.10699	exon (NM_001127541, exon 8 of 11)	-exon (NM_001127541, exon 8 of 11)	-1907	NM_022523	Cd151
chr5	150001977	150002214	0.175211	10	2.1117e-07	0.11931	Intergenic	Intergenic	196452	NM_001006979	Matn1
chr17	79986688	79986880	0.19324	12	2.1419e-07	0.12101	Intergenic	Intergenic	-4803	NM_133293	Gata3
chr6	34917684	34917826	0.224067	13	2.1688e-07	0.12253	Intergenic	Intergenic	-22535	NM_012686	Vsnl1
chr5	135286363	135286504	0.175561	23	2.1746e-07	0.12286	exon (NM_134339, exon 1 of 1)	-exon (NM_134339, exon 1 of 1)	114	NM_134339	Foxe3
chr11	34321817	34321998	0.343921	10	2.2196e-07	0.1254	Intergenic	Intergenic	-14306	NM_001107108	Sim2
chr3	140403273	140403365	0.241727	10	2.2358e-07	0.12632	Intergenic	Intergenic	-785123	NM_001106523	Cst7
chr12	23179165	23179724	0.173475	10	2.2495e-07	0.1271	intron (NM_173840, intron 8 of 10)	-intron (NM_173840, intron 8 of 10)	4891	NM_173840	Lat2
chr9	73737259	73737363	0.171309	12	2.251e-07	0.12718	TTS (NM_001128079)	-TTS (NM_001128079)	3249	NR_031831	Mir26b
chr1	189040407	189040691	0.255171	10	2.2563e-07	0.12748	Intergenic	Intergenic	521959	NM_001191631	Ppapdc1a
chr9	74490137	74490285	0.235572	13	2.2606e-07	0.12772	exon (NM_001127529, exon 3 of 17)	-exon (NM_001127529, exon 3 of 17)	1597	NM_001127529	Glb1l
chr4	2431426	2431598	0.283995	10	2.3205e-07	0.13111	Intergenic	Intergenic	44217	NM_001109214	En2
chr3	18763024	18763190	0.260979	10	2.3455e-07	0.13252	Intergenic	Intergenic	27845	NM_212511	Rpl35
chr10	43746415	43746750	0.180124	11	2.4041e-07	0.13583	intron (NM_001008382, intron 5 of 7)	-intron (NM_001008382, intron 5 of 7)	7693	NM_001008382	Cnot8
chr5	135468774	135468993	0.16938	15	2.4987e-07	0.14118	Intergenic	Intergenic	6738	NM_130401	Pdzk1ip1
chr4	185977857	185978066	0.219368	21	2.5379e-07	0.14339	exon (NM_001109612, exon 1 of 1)	-exon (NM_001109612, exon 1 of 1)	567	NM_001109612	Rps4y2
chr1	186397036	186397192	0.172423	10	2.5473e-07	0.14392	Intergenic	Intergenic	-4763	NM_001271086	Spn
chr17	738132	738256	0.204034	10	2.5837e-07	0.14598	Intergenic	Intergenic	10758	NM_001039505	Irx2
chr9	84649899	84650055	0.310359	10	2.589e-07	0.14628	intron (NM_001098240_1, intron 8 of 11)	-intron (NM_001098240_1, intron 8 of 11)	38221	NM_001009674	Itm2c
chr6	92655751	92656136	0.205604	14	2.5996e-07	0.14688	Intergenic	Intergenic	93352	NM_001024800	Tmx1
chr4	177092368	177092484	0.271435	10	2.6751e-07	0.15114	Intergenic	Intergenic	69683	NM_001012234	Plcz1
chr3	143304913	143305036	0.161842	12	2.7278e-07	0.15412	promoter-TSS (NM_001014051)	-promoter-TSS (NM_001014051)	38	NM_001014051	Ttll9
chr19	31808309	31808645	0.194043	16	2.8904e-07	0.16331	Intergenic	Intergenic	-142477	NM_001013890	Ttc29
chr2	79319156	79319843	0.25597	10	3.0139e-07	0.17028	intron (NM_053714, intron 1 of 11)	-intron (NM_053714, intron 1 of 11)	30074	NM_053714	Ankh
chr13	104423568	104423683	0.171173	12	3.0613e-07	0.17296	Intergenic	Intergenic	-58181	NM_001302219	Ush2a
chr10	76488960	76489154	0.260845	10	3.0907e-07	0.17463	TTS (NM_001013971)	-TTS (NM_001013971)	-11564	NM_001108289	Mrps23
chr8	21157392	21157464	0.167746	12	3.1298e-07	0.17683	intron (NM_172324, intron 1 of 6)	-intron (NM_172324, intron 1 of 6)	804	NM_172324	Elavl3
chr19	39868851	39868995	0.245348	10	3.1544e-07	0.17823	Intergenic	Intergenic	14760	NM_012668	Tat
chr20	6757107	6757318	0.155655	10	3.3099e-07	0.18701	Intergenic	Intergenic	-12671	NM_001113777	Armc12
chr2	27720389	27720521	0.189951	10	3.3219e-07	0.18769	intron (NM_001003401, intron 1 of 4)	-intron (NM_001003401, intron 1 of 4)	-48224	NM_001011946	Hexb
chr19	53981612	53981986	0.265602	10	3.3226e-07	0.18773	Intergenic	Intergenic	-9323	NM_013019	Rab4a
chr14	21088215	21088706	0.182888	11	3.3565e-07	0.18964	Intergenic	Intergenic	9152	NM_001012036	Utp3
chr20	48098565	48098700	0.208098	11	3.3586e-07	0.18976	Intergenic	Intergenic	-175344	NM_001014250	Atg5
chr8	10489308	10489678	0.269539	13	3.3687e-07	0.19033	Intergenic	Intergenic	-67151	NM_001108123	Mtmr2
chr20	4185767	4185901	0.171627	10	3.3972e-07	0.19194	intron (NM_031504, intron 32 of 40)	-intron (NM_031504, intron 32 of 40)	14202	NM_001002809	Atf6b
chr8	108123685	108123943	0.160304	18	3.4213e-07	0.1933	Intergenic	Intergenic	-27247	NM_001108775	Rab6b
chr9	105203519	105203718	0.186543	10	3.4226e-07	0.19338	Intergenic	Intergenic	317864	NM_001127390	Wash1
chr1	78707408	78708257	0.155068	29	3.4794e-07	0.19658	Intergenic	Intergenic	-3416	NM_001106228	Ercc1
chr7	130542022	130542230	0.257807	13	3.5492e-07	0.20053	Intergenic	Intergenic	-116710	NM_057118	Cntn1
chr10	63240289	63240494	0.196191	10	3.5616e-07	0.20123	intron (NM_133591, intron 3 of 8)	-intron (NM_133591, intron 3 of 8)	25176	NM_133591	Rph3al
chr12	22005760	22005909	0.169012	10	3.6069e-07	0.20379	promoter-TSS (NM_001277394)	-promoter-TSS (NM_001277394)	-154	NM_001277394	Srrm3
chr17	95265504	95265556	0.259055	10	3.6467e-07	0.20604	Intergenic	Intergenic	-57599	NM_001170326	Gpr158
chr1	228937751	228937910	0.194208	14	3.659e-07	0.20673	intron (NM_053706, intron 1 of 4)	-intron (NM_053706, intron 1 of 4)	1225	NM_053706	Dmrt1
chr10	14061965	14062060	0.166797	13	3.7133e-07	0.2098	intron (NM_001115033, intron 1 of 13)	-intron (NM_001115033, intron 1 of 13)	174	NM_001115033	Meiob
chr4	135469202	135469244	0.169802	10	3.7674e-07	0.21285	Intergenic	Intergenic	102075	NM_001134713	Shq1
chr3	158677385	158677550	0.223504	10	3.7803e-07	0.21358	exon (NM_053805, exon 2 of 3)	-exon (NM_053805, exon 2 of 3)	488	NM_053805	Snai1
chr6	25217378	25217467	0.15067	10	3.8036e-07	0.2149	TTS (NM_001013217)	-TTS (NM_001013217)	635	NM_019150	Ucn
chr20	27889047	27889220	0.244037	13	3.8077e-07	0.21513	intron (NM_053644, intron 6 of 66)	-intron (NM_053644, intron 6 of 66)	127011	NM_053644	Cdh23
chr18	77869068	77869366	0.305601	10	3.8657e-07	0.21841	Intergenic	Intergenic	-10564	NM_001108892	Sall3
chr3	11222476	11222748	0.155973	10	3.8874e-07	0.21964	intron (NM_001012349, intron 1 of 1)	-intron (NM_001012349, intron 1 of 1)	13014	NM_001012349	Ppapdc3
chr1	199022253	199022662	0.151032	20	4.194e-07	0.23696	Intergenic	Intergenic	-1183	NM_001108507	Pwwp2b
chr4	67303937	67304096	0.171998	11	4.2472e-07	0.23997	Intergenic	Intergenic	30356	NM_001047863	Mrps33
chr5	48231683	48231947	0.212517	13	4.2605e-07	0.24071	Intergenic	Intergenic	-20813	NM_001107920	Map3k7
chr1	83964204	83964530	0.188052	10	4.5199e-07	0.25537	Intergenic	Intergenic	-3896	NM_022582	Lgals7
chr20	13834589	13835095	0.247099	11	4.5339e-07	0.25616	promoter-TSS (NM_053294)	-promoter-TSS (NM_053294)	-711	NM_053294	Adora2a
chr19	38438170	38438515	0.292159	10	4.6215e-07	0.26111	Intergenic	Intergenic	-924173	NM_134393	Pmfbp1
chr3	149416588	149416779	0.283945	10	4.644e-07	0.26238	intron (NM_001191072, intron 1 of 10)	-intron (NM_001191072, intron 1 of 10)	12022	NM_001191072	Ppp1r16b
chr12	35643811	35644261	0.15269	10	4.7494e-07	0.26834	intron (NM_001025665, intron 6 of 10)	-intron (NM_001025665, intron 6 of 10)	20652	NM_001035252	Myl2
chr7	11439898	11440062	0.194081	16	4.7784e-07	0.26998	exon (NM_053629, exon 3 of 5)	-exon (NM_053629, exon 3 of 5)	2905	NM_053629	Fstl3
chr18	63798218	63798446	0.171259	10	4.7794e-07	0.27003	Intergenic	Intergenic	-11004	NM_172224	Impa2
chr1	209836893	209837069	0.180611	14	5.015e-07	0.28334	intron (NM_139337, intron 3 of 10)	-intron (NM_139337, intron 3 of 10)	42537	NM_001106332	Otub1
chr2	94707648	94707767	0.315429	10	5.0424e-07	0.28489	Intergenic	Intergenic	-138672	NM_024489	Zbtb10
chr7	121554787	121554876	0.204996	10	5.1967e-07	0.29361	Intergenic	Intergenic	-34613	NM_012515	Tspo
chr17	28576910	28577032	0.255749	20	5.4074e-07	0.30552	promoter-TSS (NM_001105751)	-promoter-TSS (NM_001105751)	-365	NM_001105751	Hivep1
chr6	119024818	119024937	0.189734	10	5.5199e-07	0.31187	Intergenic	Intergenic	-544488	NM_001106750	Flrt2
chr17	112527	112942	0.159699	10	5.5659e-07	0.31447	intron (NM_001107330, intron 2 of 6)	-intron (NM_001107330, intron 2 of 6)	3448	NM_001107330	Irx4
chr7	10545621	10545860	0.233849	10	5.5743e-07	0.31494	Intergenic	Intergenic	-4299	NM_001011985	Mknk2
chr1	90576308	90576819	0.260295	10	5.6452e-07	0.31895	exon (NM_001100821, exon 3 of 12)	-exon (NM_001100821, exon 3 of 12)	862	NM_001100821	Ccne1
chrX	143013113	143013425	0.1572	10	5.9458e-07	0.33594	Intergenic	Intergenic	-115455	NM_001109019	Zic3
chr1	125251766	125252573	0.203482	10	5.9853e-07	0.33817	Intergenic	Intergenic	34759	NM_080778	Nr2f2
chr5	151478311	151478767	0.193637	10	6.0127e-07	0.33972	Intergenic	Intergenic	18820	NM_001270959	Gpn2
chr1	79004842	79005124	0.180398	10	6.0272e-07	0.34053	exon (NM_001270681, exon 3 of 4)	-exon (NM_001270681, exon 3 of 4)	1282	NM_001270684	Apoe
chr4	80593160	80593295	0.202485	10	6.1571e-07	0.34788	Intergenic	Intergenic	-23237	NM_001191972	Evx1
chr19	51221688	51221912	0.163229	10	6.2904e-07	0.3554	Intergenic	Intergenic	121712	NM_001008722	Irf8
chr9	74595155	74595270	0.292575	16	6.2967e-07	0.35576	intron (NM_001024879, intron 1 of 14)	-intron (NM_001024879, intron 1 of 14)	201	NM_001024879	Dnpep
chr12	21557242	21557447	0.158897	20	6.3447e-07	0.35847	exon (NM_053669, exon 2 of 9)	-exon (NM_053669, exon 2 of 9)	12911	NM_053669	Sh2b2
chr5	160646382	160646589	0.179782	13	6.3689e-07	0.35984	exon (NM_001048185, exon 1 of 7)	-exon (NM_001048185, exon 1 of 7)	172	NM_001048185	Agmat
chr7	71823036	71823246	0.163747	10	6.3828e-07	0.36062	Intergenic	Intergenic	-19706	NM_001130560	Rnf19a
chr7	9911414	9911657	0.194645	14	6.5664e-07	0.371	Intergenic	Intergenic	-1885	NM_001009967	Pip5k1c
chr1	196309473	196309759	0.208046	11	6.5945e-07	0.37259	Intergenic	Intergenic	-319750	NM_012861	Mgmt
chr19	56799585	56799747	0.174924	10	6.5963e-07	0.37269	Intergenic	Intergenic	63501	NM_152935	Tomm20
chr1	84421346	84421459	0.162137	10	6.6114e-07	0.37354	promoter-TSS (NM_130403)	-promoter-TSS (NM_130403)	-235	NM_130403	Ppp1r14a
chr13	47194147	47194286	0.154665	10	6.6185e-07	0.37394	Intergenic	Intergenic	-1412	NM_017155	Adora1
chr1	201535204	201535454	0.165794	15	6.6779e-07	0.3773	Intergenic	Intergenic	-3885	NM_001108508	Eps8l2
chr16	39337085	39337262	0.278506	10	6.6932e-07	0.37816	Intergenic	Intergenic	446210	NM_178105	Gpm6a
chr13	93614885	93615177	0.186902	11	6.7014e-07	0.37862	Intergenic	Intergenic	-39685	NM_001109549	LOC689766
chr7	138723597	138723672	0.157464	10	6.8653e-07	0.38789	Intergenic	Intergenic	-140695	NM_001191615	Lima1
chr4	19845146	19845301	0.154772	10	6.9098e-07	0.3904	Intergenic	Intergenic	-900200	NM_001105712	Grm3
chr6	41368120	41368316	0.173917	10	6.9424e-07	0.39224	Intergenic	Intergenic	58905	NM_001302083	Odc1
chr2	24523805	24524065	0.23759	10	6.9491e-07	0.39262	intron (NM_001100636, intron 3 of 8)	-intron (NM_001100636, intron 3 of 8)	62934	NM_001100636	Scamp1
chr1	54060115	54060599	0.181363	10	6.9983e-07	0.3954	Intergenic	Intergenic	-154677	NM_001191559	Tcte3
chr9	74659288	74659429	0.155648	20	7.0404e-07	0.39778	intron (NM_001108802, intron 1 of 40)	-intron (NM_001108802, intron 1 of 40)	6833	NM_001108802	Speg
chr1	208378627	208378817	0.269129	10	7.0808e-07	0.40006	exon (NM_001191561, exon 15 of 27)	-exon (NM_001191561, exon 15 of 27)	9248	NM_001191561	Ltbp3
chr6	134739146	134739382	0.168579	12	7.1107e-07	0.40175	Intergenic	Intergenic	309379	NR_106704	Mir3072
chr10	92378847	92378991	0.271302	10	7.4012e-07	0.41817	exon (NM_001105846, exon 13 of 25)	-exon (NM_001105846, exon 13 of 25)	25906	NM_001005531	Spata32
chr7	18989195	18989362	0.200741	10	7.4118e-07	0.41876	intron (NM_001013952, intron 5 of 11)	-intron (NM_001013952, intron 5 of 11)	134064	NM_001013952	LOC300308
chr1	245500538	245501036	0.208575	10	7.6707e-07	0.43339	Intergenic	Intergenic	-101253	NM_017365	Pdlim1
chr3	118007788	118007907	0.226783	12	7.8858e-07	0.44554	promoter-TSS (NM_001106511)	-promoter-TSS (NM_001106511)	-71	NM_001106511	Cpxm1
chr10	87762093	87762676	0.158871	23	8.3189e-07	0.47001	Intergenic	Intergenic	21906	NM_031528	Rara
chr1	197032437	197032629	0.245991	10	8.489e-07	0.47962	intron (NM_001108506, intron 7 of 16)	-intron (NM_001108506, intron 7 of 16)	12899	NM_001108506	Ebf3
chr4	174921516	174921907	0.169013	14	8.637e-07	0.48799	Intergenic	Intergenic	58210	NM_001011969	Strap
chr11	43763360	43763645	0.192657	10	8.6987e-07	0.49147	promoter-TSS (NM_001013866)	-promoter-TSS (NM_001013866)	-485	NM_001013866	Cmss1
chr6	9226281	9226430	0.218274	11	8.8262e-07	0.49868	Intergenic	Intergenic	-128383	NM_001191908	Six2
chr3	10989465	10989550	0.187106	18	8.8582e-07	0.50048	exon (NM_001107830, exon 1 of 28)	-exon (NM_001107830, exon 1 of 28)	200	NM_001107830	Lamc3
chr2	190077777	190077886	0.174897	10	9.1136e-07	0.51492	exon (NM_017308, exon 18 of 18)	-exon (NM_017308, exon 18 of 18)	8343	NM_017308	Sema6c
chr19	21735713	21736001	0.227153	12	9.1603e-07	0.51755	intron (NM_080905, intron 1 of 1)	-intron (NM_080905, intron 1 of 1)	18716	NM_080905	Siah1
chr1	199612260	199613040	0.220759	10	9.2592e-07	0.52314	Intergenic	Intergenic	145552	NR_032736	Mir202
chr12	1020635	1020734	0.158617	10	9.7041e-07	0.54828	Intergenic	Intergenic	-38766	NM_001099466	Vom2r59
chr10	108442414	108442967	0.19247	10	9.7757e-07	0.55232	intron (NM_001007675, intron 1 of 3)	-intron (NM_001007675, intron 1 of 3)	10707	NM_001007675	C1qtnf1
chr12	41311506	41311654	0.270188	10	1.0038e-06	0.56713	Intergenic	Intergenic	-95586	NM_053612	Hspb8
chr6	7310794	7311237	0.321631	10	1.0283e-06	0.58098	Intergenic	Intergenic	-100560	NM_020076	Haao
chr2	181589252	181589338	0.269999	10	1.0368e-06	0.5858	Intergenic	Intergenic	9449	NM_053614	Lenep
chr12	11186943	11187452	0.19215	10	1.0419e-06	0.58865	intron (NM_053912, intron 4 of 11)	-intron (NM_053912, intron 4 of 11)	10947	NM_053912	Cyth3
chr7	141486426	141486708	0.30907	11	1.0446e-06	0.59021	Intergenic	Intergenic	6991	NR_104335	Cistr-act
chr10	57307026	57307089	0.229226	10	1.0479e-06	0.59207	exon (NM_001105800, exon 14 of 14)	-exon (NM_001105800, exon 14 of 14)	-6337	NM_001017478	Cxcl16
chr1	95981683	95981970	0.221411	10	1.0987e-06	0.62075	promoter-TSS (NM_053463)	-promoter-TSS (NM_053463)	83	NM_053463	Nucb1
chr3	164299173	164299634	0.292176	10	1.146e-06	0.64749	Intergenic	Intergenic	-107991	NM_001109542	LOC689618
chr4	59691386	59691514	0.226744	13	1.152e-06	0.6509	Intergenic	Intergenic	479453	NM_001106588	Chchd3
chr14	104467260	104467442	0.204613	10	1.1804e-06	0.66694	intron (NM_001100971, intron 21 of 21)	-intron (NM_001100971, intron 21 of 21)	-20798	NM_001109582	LOC690352
chr8	107507682	107507988	0.237113	15	1.2076e-06	0.68229	exon (NM_001108180, exon 11 of 11)	-exon (NM_001108180, exon 11 of 11)	36231	NM_001108180	Ky
chr18	31880133	31880324	0.248913	12	1.2803e-06	0.72336	Intergenic	Intergenic	-54524	NM_001107389	Arhgap26
chr12	35900870	35900985	0.190184	10	1.2857e-06	0.72642	exon (NM_001271380, exon 18 of 23)	-exon (NM_001271380, exon 18 of 23)	-53751	NM_031621	Sh2b3
chr7	123240276	123240489	0.158514	12	1.3364e-06	0.75506	exon (NM_001127547, exon 11 of 17)	-exon (NM_001127547, exon 11 of 17)	32229	NM_001127547	Fbln1
chr6	10793485	10793730	0.210044	12	1.3758e-06	0.77731	intron (NM_001100756, intron 1 of 19)	-intron (NM_001100756, intron 1 of 19)	6078	NM_001100756	Ttc7a
chr6	137005938	137006199	0.191479	12	1.3809e-06	0.78019	exon (NM_001170348, exon 13 of 15)	-exon (NM_001170348, exon 13 of 15)	58675	NM_001170348	Kif26a
chr5	149171056	149171445	0.287217	10	1.385e-06	0.78252	promoter-TSS (NM_013064)	-promoter-TSS (NM_013064)	-515	NM_013064	Hcrtr1
chr7	1742742	1742853	0.183068	18	1.401e-06	0.79154	Intergenic	Intergenic	32808	NM_001100983	Myl6l
chr10	31328629	31328904	0.172799	12	1.4029e-06	0.79265	intron (NM_001106996, intron 27 of 29)	-intron (NM_001106996, intron 27 of 29)	-28470	NM_001106995	Nipal4
chr1	266008071	266008250	0.27869	10	1.4127e-06	0.79818	intron (NM_001109169, intron 2 of 2)	-intron (NM_001109169, intron 2 of 2)	3904	NM_001109169	Emx2
chr16	83544295	83544774	0.179721	10	1.4272e-06	0.80637	Intergenic	Intergenic	-135178	NM_001047978	LOC689713
chr18	79405445	79405504	0.161294	10	1.4297e-06	0.8078	Intergenic	Intergenic	-40131	NM_001191695	Zfp516
chr12	15708918	15709297	0.198143	10	1.4422e-06	0.81483	intron (NM_001025033, intron 2 of 4)	-intron (NM_001025033, intron 2 of 4)	10785	NM_133573	Gper1
chr20	10258772	10259019	0.212204	10	1.4472e-06	0.81765	Intergenic	Intergenic	32839	NM_021693	Sik1
chr12	29881707	29882015	0.206863	15	1.4671e-06	0.8289	intron (NM_198727, intron 3 of 8)	-intron (NM_198727, intron 3 of 8)	-230002	NM_144758	Slc15a4
chr1	251932268	251932630	0.155655	12	1.4917e-06	0.84281	intron (NM_001127484, intron 1 of 3)	-intron (NM_001127484, intron 1 of 3)	30889	NM_001127484	Wbp1l
chr1	247234652	247234837	0.176641	14	1.4988e-06	0.84681	Intergenic	Intergenic	-10705	NM_001107594	Nkx2-3
chr3	57290800	57291028	0.164468	17	1.5145e-06	0.8557	exon (NM_001191903, exon 1 of 2)	-exon (NM_001191903, exon 1 of 2)	570	NM_001191903	Hoxd12
chr4	2204064	2204243	0.167021	10	1.5189e-06	0.8582	intron (NM_017221, intron 1 of 2)	-intron (NM_017221, intron 1 of 2)	3650	NM_017221	Shh
chr8	104501384	104501681	0.291285	12	1.5282e-06	0.86344	Intergenic	Intergenic	-6068	NM_001014095	Dzip1l
chr3	10679337	10679475	0.206827	14	1.5416e-06	0.87099	promoter-TSS (NM_001039337)	-promoter-TSS (NM_001039337)	-294	NM_001039337	Fubp3
chr13	49843467	49843852	0.23881	13	1.5509e-06	0.87624	Intergenic	Intergenic	143061	NM_001012030	Zfp281
chr2	122669774	122669860	0.187705	10	1.6069e-06	0.90787	exon (NM_001047885, exon 10 of 10)	-exon (NM_001047885, exon 10 of 10)	6780	NM_001047885	Arse
chr15	85711269	85711841	0.255855	10	1.616e-06	0.91304	intron (NM_001001515, intron 1 of 30)	-intron (NM_001001515, intron 1 of 30)	580	NM_001001515	Lmo7
chr4	119755507	119755958	0.181732	14	1.6213e-06	0.91605	Intergenic	Intergenic	11879	NM_019137	Egr4
chr2	127698906	127699061	0.152955	17	1.6312e-06	0.9216	exon (NM_001106428, exon 2 of 20)	-exon (NM_001106428, exon 2 of 20)	1480	NM_001106428	Hspa4l
chr3	106258713	106259127	0.195642	16	1.7044e-06	0.96296	intron (NM_031045, intron 1 of 6)	-intron (NM_031045, intron 1 of 6)	1438	NM_031045	Itpka
chr20	7358032	7358389	0.193785	15	1.7508e-06	0.9892	Intergenic	Intergenic	-18114	NM_080782	Cdkn1a
chr1	107698260	107698916	0.221852	10	6.878e-06	1	intron (NM_001271493, intron 1 of 22)	-intron (NM_001271493, intron 1 of 22)	28110	NM_001271493	LOC100365773
chr1	108820983	108821064	0.165624	10	0.0002234	1	promoter-TSS (NM_024370)	-promoter-TSS (NM_024370)	27	NM_024370	Gabrg3
chr1	120538497	120538564	0.1524	10	9.7743e-06	1	promoter-TSS (NM_001106268)	-promoter-TSS (NM_001106268)	-471	NM_001106268	Chsy1
chr1	124467090	124467509	0.193467	10	1.6263e-05	1	Intergenic	Intergenic	819629	NM_080778	Nr2f2
chr1	125210883	125210993	0.256734	10	3.7676e-06	1	Intergenic	Intergenic	75991	NM_080778	Nr2f2
chr1	131146376	131146652	0.226416	10	0.00014131	1	intron (NM_001106271, intron 2 of 38)	-intron (NM_001106271, intron 2 of 38)	93840	NM_001106271	Akap13
chr1	15419239	15419365	0.151682	23	4.9905e-05	1	promoter-TSS (NM_001198638)	-promoter-TSS (NM_001198638)	-221	NM_001198638	Map7
chr1	156101834	156101961	0.155735	12	0.02063	1	Intergenic	Intergenic	-24071	NM_080401	Wnt11
chr1	156989866	156990146	0.169044	10	0.0034465	1	Intergenic	Intergenic	38881	NM_080786	Slco2b1
chr1	158096077	158096255	0.215209	10	2.7516e-06	1	promoter-TSS (NM_172033)	-promoter-TSS (NM_172033)	31	NM_172033	Plekhb1
chr1	158860190	158860505	0.18225	10	1.1882e-05	1	Intergenic	Intergenic	40378	NM_001013069	Stard10
chr1	158961186	158961503	0.170914	10	6.4818e-05	1	intron (NM_031079, intron 1 of 29)	-intron (NM_001143847, intron 2 of 30)	9587	NM_031079	Pde2a
chr1	159272790	159273229	0.168001	12	0.00031503	1	promoter-TSS (NM_053869)	-promoter-TSS (NM_053869)	-514	NM_053869	Phox2a
chr1	160113163	160113467	0.194737	22	0.00045177	1	Intergenic	Intergenic	-21340	NM_001000127	Olr40
chr1	163157018	163157339	0.175225	10	4.6595e-06	1	intron (NM_013165, intron 1 of 4)	-intron (NM_013165, intron 1 of 4)	265	NM_013165	Cckbr
chr1	16472263	16472801	0.173262	10	0.00099561	1	Intergenic	Intergenic	139731	NM_001002277	Ahi1
chr1	168381796	168382266	0.194387	10	0.00027187	1	exon (NM_012715, exon 4 of 4)	-exon (NM_012715, exon 4 of 4)	1776	NM_012715	Adm
chr1	174191730	174192017	0.232334	10	3.4465e-06	1	Intergenic	Intergenic	17960	NM_001013898	RGD1311703
chr1	176824165	176824278	0.193613	10	0.011098	1	Intergenic	Intergenic	-13016	NM_001191950	Tmc7
chr1	180203118	180203209	0.180895	10	0.0010034	1	exon (NM_181370, exon 1 of 2)	-exon (NM_181370, exon 1 of 2)	373	NM_181370	Hs3st2
chr1	182366212	182366571	0.179679	10	0.00027826	1	Intergenic	Intergenic	34898	NM_019158	Aqp8
chr1	186008323	186008484	0.229836	10	5.2353e-06	1	TTS (NM_001106296)	-TTS (NM_001106296)	1329	NM_001109155	RGD1563217
chr1	196859790	196859919	0.166271	10	0.0001231	1	intron (NM_012861, intron 3 of 4)	-intron (NM_012861, intron 3 of 4)	185577	NM_001108506	Ebf3
chr1	201110431	201110588	0.252229	10	7.4749e-06	1	Intergenic	Intergenic	24751	NM_134375	Nlrp6
chr1	201199215	201199738	0.176339	11	4.7879e-06	1	exon (NM_001136124, exon 1 of 2)	-exon (NM_001136124, exon 1 of 2)	291	NM_001136124	Ifitm3
chr1	201289939	201290346	0.171051	13	3.5392e-06	1	intron (NM_001024887, intron 5 of 9)	-intron (NM_001024887, intron 5 of 9)	7017	NM_001024887	Sigirr
chr1	203751872	203752016	0.295868	10	3.7767e-06	1	intron (NM_032073, intron 14 of 14)	-intron (NM_032073, intron 14 of 14)	85899	NM_001033757	Cdkn1c
chr1	203879378	203879525	0.195351	10	2.6341e-05	1	promoter-TSS (NM_001100521)	-promoter-TSS (NM_001100521)	-420	NM_001100521	Phlda2
chr1	207694287	207694434	0.188919	10	7.031e-05	1	Intergenic	Intergenic	4408	NM_001106325	Cd248
chr1	208398320	208398752	0.164839	13	6.196e-05	1	intron (NM_001011938, intron 2 of 16)	-intron (NM_001011938, intron 2 of 16)	729	NM_001011938	Scyl1
chr1	208479302	208479712	0.209272	11	4.3541e-06	1	Intergenic	Intergenic	30440	NM_001008348	Frmd8
chr1	208921507	208921655	0.184278	10	0.0059097	1	promoter-TSS (NM_031711)	-promoter-TSS (NM_031711)	-180	NM_031711	Arl2
chr1	209083653	209083751	0.240401	10	0.00021345	1	promoter-TSS (NM_001130013)	-promoter-TSS (NM_001130013)	-255	NM_001130013	Cdc42bpg
chr1	209356265	209356909	0.162963	12	0.00035709	1	Intergenic	Intergenic	-28669	NM_001034943	Slc22a12
chr1	211550539	211550641	0.239655	10	0.00096886	1	promoter-TSS (NM_001168661)	-promoter-TSS (NM_001168661)	9	NM_001168661	LOC690344
chr1	21567602	21568107	0.161111	10	2.3975e-06	1	Intergenic	Intergenic	194169	NM_021869	Stx7
chr1	227245129	227245170	0.199245	10	9.7786e-06	1	exon (NM_031779, exon 2 of 13)	-exon (NM_031779, exon 2 of 13)	138322	NM_031779	Apba1
chr1	227554572	227554683	0.157863	15	0.00050691	1	intron (NM_053773, intron 1 of 30)	-intron (NM_053773, intron 1 of 30)	19829	NM_053773	Tjp2
chr1	229039192	229039433	0.262185	10	4.4827e-06	1	Intergenic	Intergenic	-4989	NM_001106358	Dmrt3
chr1	23502177	23502391	0.180223	10	0.00074113	1	exon (NM_001193568, exon 12 of 12)	-exon (NM_001193568, exon 12 of 12)	4413	NM_019232	Sgk1
chr1	236393950	236394169	0.180296	12	0.00044752	1	intron (NM_181386, intron 1 of 9)	-intron (NM_181386, intron 1 of 9)	2572	NM_181386	Sgms1
chr1	238602149	238602466	0.199888	16	2.4787e-05	1	Intergenic	Intergenic	-6862	NM_020096	Ifit1
chr1	240379575	240379938	0.156066	11	0.003214	1	Intergenic	Intergenic	-54956	NM_013220	Ankrd1
chr1	241534171	241534418	0.220589	10	5.7183e-05	1	Intergenic	Intergenic	58901	NM_001106372	March5
chr1	242506740	242507225	0.155705	10	8.1817e-06	1	intron (NM_001108522, intron 16 of 21)	-intron (NM_001108522, intron 16 of 21)	43842	NM_001014246	Fra10ac1
chr1	245356775	245356966	0.227875	10	4.9406e-06	1	exon (NM_017365, exon 5 of 7)	-exon (NM_017365, exon 5 of 7)	-27440	NM_138512	Cyp2c22
chr1	250956916	250957293	0.164627	10	4.9755e-05	1	promoter-TSS (NM_133286)	-promoter-TSS (NM_133286)	-375	NM_133286	Fgf8
chr1	251543352	251543514	0.150309	10	1.4989e-05	1	promoter-TSS (NM_001107603)	-promoter-TSS (NM_001107603)	-693	NM_134370	Psd
chr1	252186191	252186802	0.163631	10	0.00025038	1	intron (NM_001011942, intron 5 of 7)	-intron (NM_001011942, intron 5 of 7)	109238	NM_001011942	Cnnm2
chr1	253059190	253059623	0.176792	11	0.010718	1	promoter-TSS (NM_001106366)	-promoter-TSS (NM_001106366)	-22	NM_001106366	Col17a1
chr1	253334495	253334719	0.205228	10	0.00057827	1	Intergenic	Intergenic	-27039	NR_037378	Mir3584
chr1	259324852	259325168	0.208301	10	6.4083e-06	1	Intergenic	Intergenic	-65031	NM_013160_1	Mxi1
chr1	259755093	259755196	0.176643	10	0.001426	1	intron (NM_133578, intron 1 of 3)	-intron (NM_133578, intron 1 of 3)	911	NM_133578	Dusp5
chr1	262596721	262596983	0.192506	12	2.8005e-05	1	intron (NM_001113743, intron 38 of 41)	-intron (NM_001107443, intron 37 of 40)	40406	NM_001001505	Habp2
chr1	265705440	265705549	0.178754	10	5.7962e-06	1	Intergenic	Intergenic	-2175	NM_022636	Vax1
chr1	266001766	266002056	0.157061	10	0.0057696	1	Intergenic	Intergenic	-2346	NM_001109169	Emx2
chr1	3157357	3157452	0.18557	10	0.00079828	1	intron (NM_001108458, intron 1 of 7)	-intron (NM_001108458, intron 1 of 7)	826	NM_001108458	Ust
chr1	32827881	32828401	0.193299	13	0.00012165	1	Intergenic	Intergenic	-1176631	NM_133425	Ppp1r14c
chr1	385465	385724	0.154787	10	0.0025322	1	Intergenic	Intergenic	-118584	NM_001099461	Vom2r1
chr1	40152123	40152478	0.197994	10	4.0752e-05	1	Intergenic	Intergenic	248266	NM_183334	Ldhal6b
chr1	40403695	40403806	0.203814	10	0.0019991	1	intron (NM_001144860, intron 3 of 4)	-intron (NM_001144860, intron 3 of 4)	-3184	NM_183334	Ldhal6b
chr1	42282508	42282609	0.235283	10	0.00068728	1	intron (NM_012756, intron 2 of 47)	-intron (NM_012756, intron 2 of 47)	29286	NM_012756	Igf2r
chr1	42337128	42337390	0.185743	10	2.6014e-05	1	intron (NM_012756, intron 45 of 47)	-intron (NM_012756, intron 45 of 47)	-13980	NM_012697	Slc22a1
chr1	47088771	47088917	0.191228	13	0.0021387	1	intron (NM_133561, intron 1 of 4)	-intron (NM_133561, intron 1 of 4)	500	NM_133561	Mpc1
chr1	65035884	65036039	0.277953	10	0.00078615	1	Intergenic	Intergenic	57359	NM_001191620	Zfp418
chr1	65535967	65536268	0.15453	10	0.00021164	1	intron (NM_001107473, intron 1 of 6)	-intron (NM_001107473, intron 1 of 6)	218	NM_001107473	Zim1
chr1	66055151	66055230	0.161346	10	0.0012661	1	promoter-TSS (NM_001008557)	-promoter-TSS (NM_001008557)	-371	NM_001008557	Zfp667
chr1	79428239	79428702	0.23146	10	0.00082501	1	promoter-TSS (NM_133323)	-promoter-TSS (NM_133323)	-291	NM_133323	Zfp111
chr1	79784992	79785369	0.168477	12	6.1385e-05	1	intron (NM_001047107, intron 3 of 7)	-intron (NM_001047107, intron 3 of 7)	1209	NM_001047107	Cadm4
chr1	80043175	80043486	0.159591	10	0.010096	1	exon (NM_001191948, exon 11 of 17)	-exon (NM_001191948, exon 11 of 17)	10407	NM_001191948	Cd177
chr1	82680870	82681149	0.152978	11	0.00060973	1	Intergenic	Intergenic	-5223	NM_017093	Akt2
chr1	83369241	83369559	0.281823	10	1.81e-06	1	intron (NM_001166396, intron 1 of 5)	-intron (NM_001166396, intron 1 of 5)	825	NM_001166396	Selv
chr1	83477905	83478272	0.215472	10	0.0029049	1	intron (NM_001134972, intron 7 of 18)	-intron (NM_001134972, intron 7 of 18)	4510	NM_001134972	Plekhg2
chr1	83491599	83491726	0.190292	10	0.00077853	1	Intergenic	Intergenic	-2540	NM_133290	Zfp36
chr1	83551636	83552118	0.219681	10	1.2389e-05	1	promoter-TSS (NM_181091)	-promoter-TSS (NM_181091)	-155	NM_181091	Gmfg
chr1	84305607	84305716	0.1829	10	0.0019583	1	exon (NM_001013065, exon 1 of 2)	-exon (NM_001013065, exon 1 of 2)	680	NM_001013065	Ggn
chr1	85408080	85408260	0.196221	13	3.6692e-05	1	exon (NM_001271398, exon 9 of 15)	-exon (NM_001271398, exon 9 of 15)	4180	NM_001271398	Kirrel2
chr1	86013238	86013917	0.206062	10	0.00012189	1	Intergenic	Intergenic	-4196	NM_032616	Lsr
chr1	89162093	89162190	0.164991	10	1.7164e-05	1	Intergenic	Intergenic	-1736	NM_001107506	Tshz3
chr1	90577362	90577452	0.182294	17	0.00014635	1	promoter-TSS (NM_001100821)	-promoter-TSS (NM_001100821)	19	NM_001100821	Ccne1
chr1	91192162	91192746	0.181361	10	0.0012782	1	Intergenic	Intergenic	-318790	NM_001108913	LOC365238
chr1	95231291	95231462	0.1614	14	5.2115e-05	1	intron (NM_001005561, intron 1 of 14)	-intron (NM_001005561, intron 1 of 14)	211	NM_001005561	Vrk3
chr1	95653621	95653765	0.16936	10	0.0002865	1	Intergenic	Intergenic	-4057	NM_001109144	Pth2
chr1	95744966	95745031	0.221983	12	1.0589e-05	1	Intergenic	Intergenic	-2403	NM_001109146	RGD1562492
chr1	95784337	95784651	0.253048	10	0.00014045	1	intron (NM_001136229, intron 16 of 24)	-intron (NM_001136229, intron 16 of 24)	19048	NM_001136229	Trpm4
chr1	96086143	96086431	0.150377	12	6.027e-06	1	exon (NM_031236, exon 1 of 2)	-exon (NM_031236, exon 1 of 2)	373	NM_031236	Fut1
chr1	96211003	96211140	0.16183	10	0.0020332	1	intron (NM_001039665, intron 1 of 6)	-intron (NM_001039665, intron 1 of 6)	-17143	NM_001109623	Spaca4
chr1	99543962	99544113	0.152835	10	0.0004401	1	Intergenic	Intergenic	-19149	NM_001106263	Htatip2
chr10	101173428	101173645	0.172511	13	2.7988e-05	1	Intergenic	Intergenic	598552	NM_017296	Kcnj2
chr10	101363208	101363327	0.199689	10	0.00012923	1	Intergenic	Intergenic	788283	NM_017296	Kcnj2
chr10	103246128	103246243	0.159254	10	0.033323	1	promoter-TSS (NM_019348)	-promoter-TSS (NM_019348)	-694	NM_019348	Sstr2
chr10	105520553	105520672	0.159904	10	0.00078108	1	Intergenic	Intergenic	-21200	NM_019383_1	Atp5h
chr10	105990201	105990361	0.243496	10	1.0078e-05	1	Intergenic	Intergenic	-17390	NM_001163002	Smim5
chr10	106139443	106139508	0.194809	13	4.2221e-05	1	Intergenic	Intergenic	-6935	NM_053985	H3f3b
chr10	106590322	106590566	0.307559	10	4.4472e-06	1	exon (NM_022545, exon 4 of 10)	-exon (NM_022545, exon 4 of 10)	13628	NM_022545	Prpsap1
chr10	106618197	106618511	0.153932	10	0.0090925	1	Intergenic	Intergenic	-14282	NM_022545	Prpsap1
chr10	107638335	107638779	0.252758	10	3.1956e-06	1	Intergenic	Intergenic	193239	NM_001113497	Sept9
chr10	107707084	107707361	0.184966	10	0.00048109	1	Intergenic	Intergenic	252107	NM_053565	Socs3
chr10	108426936	108427165	0.200348	10	0.00037469	1	Intergenic	Intergenic	-4933	NM_001007675	C1qtnf1
chr10	109409803	109409939	0.158348	12	0.00052412	1	intron (NM_057196, intron 9 of 13)	-intron (NM_057196, intron 9 of 13)	-17104	NR_037349	Mir3065
chr10	109460929	109461824	0.156237	10	0.0047203	1	Intergenic	Intergenic	-5195	NM_001168703	Aatk
chr10	110051636	110051848	0.223744	10	0.00013426	1	intron (NM_001013975, intron 3 of 11)	-intron (NM_001013975, intron 3 of 11)	2364	NM_001013975	Notum
chr10	110093501	110094017	0.229834	10	0.00015828	1	Intergenic	Intergenic	-39653	NM_001013975	Notum
chr10	110409663	110410003	0.152488	10	5.6123e-05	1	intron (NM_001013976, intron 8 of 8)	-intron (NM_001013976, intron 8 of 8)	15051	NM_020537	Uts2r
chr10	13632953	13633239	0.190138	10	0.00028195	1	Intergenic	Intergenic	-32593	NM_001031637	Abca17
chr10	13986572	13987079	0.223076	10	0.00044853	1	intron (NM_001191589, intron 2 of 9)	-intron (NM_001191589, intron 2 of 9)	4878	NM_001191589	Rpl3l
chr10	14644921	14645497	0.193539	13	0.00034097	1	intron (NM_153814, intron 1 of 33)	-intron (NM_153814, intron 1 of 33)	27598	NM_175593	Tpsg1
chr10	15098992	15099156	0.28	10	0.001219	1	promoter-TSS (NM_001025625)	-promoter-TSS (NM_001025625)	-643	NM_001025625	Stub1
chr10	15102507	15102564	0.161844	10	2.7052e-06	1	promoter-TSS (NM_001191822)	-promoter-TSS (NM_001191822)	3	NM_001191822	Rhbdl1
chr10	15330520	15330647	0.174694	10	0.006072	1	Intergenic	Intergenic	28056	NM_171996	Decr2
chr10	16512808	16512938	0.171253	10	0.00016394	1	Intergenic	Intergenic	-1730	NM_022230	Stc2
chr10	16597447	16597576	0.154188	11	0.006073	1	Intergenic	Intergenic	-8671	NM_053651	Nkx2-5
chr10	16848603	16848977	0.152728	10	0.016698	1	Intergenic	Intergenic	-84211	NM_053578	Atp6v0e1
chr10	18093875	18094466	0.18145	10	3.8961e-06	1	Intergenic	Intergenic	-31457	NM_012992	Npm1
chr10	18438357	18438504	0.186612	10	2.3934e-05	1	Intergenic	Intergenic	-25328	NM_001106994	Ranbp17
chr10	28779280	28779737	0.183768	10	2.7224e-05	1	Intergenic	Intergenic	-9647	NM_001127296	Pwwp2a
chr10	29763385	29763552	0.150936	12	0.00059051	1	Intergenic	Intergenic	-6320	NM_053820	Ebf1
chr10	31129820	31129977	0.174353	10	1.2361e-05	1	Intergenic	Intergenic	-34913	NM_001013966	Thg1l
chr10	31300362	31300593	0.163948	10	0.00026207	1	promoter-TSS (NM_001106995)	-promoter-TSS (NM_001106995)	-181	NM_001106995	Nipal4
chr10	31556966	31557065	0.251329	10	0.0038116	1	promoter-TSS (NM_001286183)	-promoter-TSS (NM_001286183)	-92	NM_001286183	Med7
chr10	38473884	38473993	0.19735	10	8.0241e-06	1	intron (NM_001107000, intron 4 of 14)	-intron (NM_001107000, intron 4 of 14)	275119	NM_153629	Hspa4
chr10	38669275	38669422	0.177719	12	0.0005833	1	Intergenic	Intergenic	79709	NM_153629	Hspa4
chr10	45432363	45432457	0.17914	10	1.4431e-05	1	Intergenic	Intergenic	35896	NM_001108827_1	Iba57
chr10	46184474	46185000	0.15904	10	0.00022277	1	intron (NM_001105785, intron 2 of 4)	-intron (NM_001105785, intron 2 of 4)	9931	NM_001105785	Nt5m
chr10	48413720	48414073	0.226689	10	1.2167e-05	1	Intergenic	Intergenic	-7698	NM_017161	Adora2b
chr10	49155340	49155540	0.21843	10	1.094e-05	1	Intergenic	Intergenic	-84321	NM_001024739	Tekt3
chr10	55148240	55148376	0.166173	10	0.0003371	1	Intergenic	Intergenic	-14772	NM_053731	Ntn1
chr10	57053573	57053948	0.167636	14	0.0007046	1	intron (NM_001105797, intron 4 of 6)	-intron (NM_001105797, intron 4 of 6)	2208	NM_001105797	Slc16a11
chr10	57580004	57580172	0.299217	10	2.3658e-06	1	promoter-TSS (NM_145877)	-promoter-TSS (NM_145877)	101	NM_001108280	Inca1
chr10	62479447	62479545	0.174095	10	0.00055211	1	promoter-TSS (NR_031925)	-promoter-TSS (NR_031925)	-938	NR_031925	Mir212
chr10	65218154	65218627	0.208027	10	0.00053113	1	intron (NM_001108284, intron 3 of 17)	-intron (NM_001108284, intron 3 of 17)	-66339	NM_012977	Lgals9
chr10	6988163	6988932	0.176171	11	7.3048e-05	1	intron (NM_152790, intron 1 of 3)	-intron (NM_152790, intron 1 of 3)	1965	NM_152790	Carhsp1
chr10	73501518	73501623	0.156677	10	0.0020558	1	intron (NM_001100969, intron 1 of 12)	-intron (NM_001100969, intron 1 of 12)	602	NM_001100969	Appbp2
chr10	74138439	74138680	0.18873	12	0.00011252	1	intron (NM_001107034, intron 1 of 8)	-intron (NM_001107034, intron 1 of 8)	2144	NM_001107034	Tbx4
chr10	83758347	83758801	0.160172	10	5.4969e-05	1	Intergenic	Intergenic	-33601	NM_030872	Pdk2
chr10	83802856	83802985	0.172755	10	0.0010032	1	intron (NM_001105832, intron 1 of 2)	-intron (NM_001105832, intron 1 of 2)	752	NM_001105832	Dlx3
chr10	85025884	85026242	0.193305	18	0.0066858	1	Intergenic	Intergenic	8623	NM_001017480	Hoxb7
chr10	85049745	85049962	0.158469	11	0.00026238	1	promoter-TSS (NM_001100787)	-promoter-TSS (NM_001100787)	540	NR_031814	Mir10a
chr10	85088252	85088403	0.151866	14	0.00025386	1	Intergenic	Intergenic	11800	NM_001107042	Hoxb3
chr10	87253162	87253478	0.172778	10	0.0025351	1	intron (NM_053403, intron 1 of 14)	-intron (NM_053403, intron 1 of 14)	749	NM_053403	Grb7
chr10	90635575	90635763	0.206696	11	0.0048018	1	Intergenic	Intergenic	-23530	NM_001105842	Rdm1
chr10	91212201	91212461	0.17002	10	0.00036674	1	intron (NM_001107053, intron 1 of 6)	-intron (NM_001107053, intron 1 of 6)	841	NM_001107053	Nags
chr10	91212863	91213043	0.216172	10	2.7713e-06	1	exon (NM_001107053, exon 3 of 7)	-exon (NM_001107053, exon 3 of 7)	1463	NM_001107053	Nags
chr10	91399856	91399978	0.19045	12	0.020626	1	Intergenic	Intergenic	-1459	NM_001127690	Ubtf
chr10	95555488	95555582	0.160557	10	0.00012174	1	Intergenic	Intergenic	-1001	NM_001025715	Limd2
chr10	98593452	98593562	0.156205	10	0.0091448	1	Intergenic	Intergenic	59373	NM_019224	Rgs9
chr11	25156929	25157125	0.153278	10	0.00037307	1	exon (NM_001013980, exon 1 of 5)	-exon (NM_001013980, exon 1 of 5)	277	NM_001013980	Cyyr1
chr11	29921657	29922051	0.238407	12	0.00027062	1	Intergenic	Intergenic	-105512	NM_017050	Sod1
chr11	31153539	31153687	0.202684	12	1.2994e-05	1	Intergenic	Intergenic	-51803	NM_001100557	Olig2
chr11	32045653	32045897	0.286846	10	3.1384e-05	1	Intergenic	Intergenic	-17500	NM_053715	Slc5a3
chr11	32898848	32899098	0.157935	10	0.0032322	1	Intergenic	Intergenic	-173569	NM_017325	Runx1
chr11	34329147	34329228	0.220063	10	0.00016591	1	Intergenic	Intergenic	-7026	NM_001107108	Sim2
chr11	34336212	34336356	0.192972	21	5.7371e-06	1	promoter-TSS (NM_001107108)	-promoter-TSS (NM_001107108)	70	NM_001107108	Sim2
chr11	34347548	34347718	0.274286	10	6.8175e-06	1	intron (NM_001107108, intron 2 of 10)	-intron (NM_001107108, intron 2 of 10)	11419	NM_001107108	Sim2
chr11	37616973	37617072	0.16618	12	3.4456e-06	1	intron (NM_130424, intron 1 of 13)	-intron (NM_130424, intron 1 of 13)	266	NM_130424	Tmprss2
chr11	65926613	65926798	0.172961	12	0.00052624	1	promoter-TSS (NM_001127536)	-promoter-TSS (NM_001127536)	-185	NM_001127536	Ildr1
chr11	69483082	69483442	0.232489	10	0.0018311	1	exon (NM_001108843, exon 17 of 17)	-exon (NM_001108843, exon 17 of 17)	63871	NM_001108843	Lmln
chr11	70101695	70101989	0.177815	12	0.00025954	1	intron (NM_001039259, intron 5 of 8)	-intron (NM_001039259, intron 5 of 8)	3455	NM_001039259	Zdhhc19
chr11	70435517	70436045	0.164151	12	0.0036219	1	Intergenic	Intergenic	-13335	NM_001024995	Nrros
chr11	71635583	71635744	0.166165	14	0.00010499	1	Intergenic	Intergenic	223958	NM_001034006	Acap2
chr11	85512950	85513024	0.159996	10	0.0012891	1	Intergenic	Intergenic	-1953	NM_001013977	Aifm3
chr12	10099992	10100212	0.192073	11	9.2881e-05	1	intron (NM_001105907, intron 34 of 71)	-intron (NM_001105907, intron 34 of 71)	43634	NM_001105907	Trrap
chr12	12144130	12144234	0.155355	10	1.8433e-06	1	intron (NM_001107123, intron 1 of 34)	-intron (NM_001107123, intron 1 of 34)	1587	NM_001107123	Tnrc18
chr12	14502551	14502757	0.178008	10	4.0256e-05	1	intron (NM_133393, intron 1 of 7)	-intron (NM_133393, intron 1 of 7)	3069	NM_133393	Lfng
chr12	14516101	14516602	0.257457	12	5.3185e-05	1	Intergenic	Intergenic	-10629	NM_133393	Lfng
chr12	1541704	1541820	0.165712	10	3.0454e-05	1	Intergenic	Intergenic	-3706	NM_001013121	Snapc2
chr12	15702013	15702292	0.152704	10	0.00048433	1	intron (NM_001025033, intron 2 of 4)	-intron (NM_001025033, intron 2 of 4)	15739	NM_001025033	LOC498154
chr12	16150976	16151129	0.164919	13	0.0017631	1	promoter-TSS (NM_012801)	-promoter-TSS (NM_012801)	8	NM_012801	Pdgfa
chr12	17860252	17860553	0.168909	17	7.5738e-05	1	exon (NM_138511, exon 8 of 10)	-exon (NM_138511, exon 8 of 10)	-3090	NM_001109064	Gal3st4
chr12	17864941	17865056	0.174465	12	0.00010389	1	promoter-TSS (NM_053730)	-promoter-TSS (NM_053730)	-274	NM_053730	Stag3
chr12	23801715	23802020	0.173466	10	5.0318e-06	1	Intergenic	Intergenic	-27996	NM_001100561	Gatsl2
chr12	2522526	2522691	0.153211	10	0.00014666	1	intron (NM_031126, intron 1 of 18)	-intron (NM_031126, intron 1 of 18)	209	NM_031126	Stxbp2
chr12	28248944	28249084	0.164683	14	3.3977e-05	1	intron (NM_001034924, intron 1 of 17)	-intron (NM_001034924, intron 1 of 17)	411	NM_001034924	Sfswap
chr12	32584741	32585250	0.278851	10	2.4505e-05	1	intron (NM_001108334, intron 1 of 46)	-intron (NM_001108334, intron 1 of 46)	22203	NM_001108334	Ncor2
chr12	32683765	32684273	0.228466	10	8.164e-05	1	intron (NM_001108334, intron 17 of 46)	-intron (NM_001108334, intron 17 of 46)	55661	NM_001109547	Fam101a
chr12	33497947	33498383	0.193013	10	0.00040911	1	intron (NM_001107139, intron 1 of 22)	-intron (NM_001107139, intron 1 of 22)	1463	NM_001107139	Pitpnm2
chr12	35452278	35452475	0.267692	10	0.00016378	1	intron (NM_001107141, intron 3 of 5)	-intron (NM_001107141, intron 3 of 5)	31294	NM_001107141	Pptc7
chr12	35906283	35906429	0.170773	10	9.3886e-06	1	exon (NM_001271380, exon 22 of 23)	-exon (NM_001271380, exon 22 of 23)	-48323	NM_031621	Sh2b3
chr12	35921277	35921432	0.164515	10	0.00011842	1	Intergenic	Intergenic	-33324	NM_031621	Sh2b3
chr12	36117690	36117916	0.15666	10	0.0015557	1	Intergenic	Intergenic	-10735	NM_001164043	Mapkapk5
chr12	37163535	37163635	0.205519	10	0.00013097	1	intron (NM_139332, intron 2 of 19)	-intron (NM_139332, intron 2 of 19)	23157	NM_139332	Tpcn1
chr12	37332278	37332366	0.158569	10	9.3725e-06	1	promoter-TSS (NM_139036)	-promoter-TSS (NM_139036)	-65	NM_139036	Lhx5
chr12	38271545	38271771	0.232818	10	3.596e-05	1	Intergenic	Intergenic	-104988	NM_181638	Tbx3
chr12	40265004	40265202	0.21299	10	2.7278e-05	1	Intergenic	Intergenic	-130839	NM_001107146	Rfc5
chr12	42304968	42305235	0.150959	10	0.0014719	1	intron (NM_001168664, intron 2 of 57)	-intron (NM_001168664, intron 2 of 57)	8829	NM_001168664	Gcn1l1
chr12	42396531	42396765	0.15141	12	1.0482e-05	1	exon (NM_001107147, exon 2 of 5)	-exon (NM_001107147, exon 2 of 5)	2112	NM_001107147	Sirt4
chr12	43789863	43790332	0.174203	10	0.010468	1	intron (NM_001109327, intron 2 of 10)	-intron (NM_001109327, intron 2 of 10)	42910	NM_001109327	Coro1c
chr12	43837982	43838264	0.222937	10	0.00019416	1	Intergenic	Intergenic	-4145	NM_001013230	Selplg
chr12	43846190	43846353	0.171338	10	0.0014863	1	Intergenic	Intergenic	4004	NM_001013230	Selplg
chr12	44294655	44295088	0.16916	10	0.0031737	1	Intergenic	Intergenic	-34940	NM_001105937	Sgsm1
chr12	44436192	44436888	0.188597	10	1.2621e-05	1	Intergenic	Intergenic	106728	NM_001105937	Sgsm1
chr12	44441199	44441344	0.19016	10	2.9257e-05	1	Intergenic	Intergenic	111460	NM_001105937	Sgsm1
chr12	44441511	44441823	0.160459	10	0.00093991	1	Intergenic	Intergenic	111855	NM_001105937	Sgsm1
chr12	44462865	44463657	0.24195	12	5.2066e-05	1	Intergenic	Intergenic	133449	NM_001105937	Sgsm1
chr12	45592248	45592601	0.155456	10	0.00073297	1	Intergenic	Intergenic	-157681	NM_053742	Pitpnb
chr12	6273822	6274189	0.184969	14	6.0155e-05	1	Intergenic	Intergenic	-4210	NM_017260	Alox5ap
chr12	7630685	7630950	0.176469	10	0.00033938	1	Intergenic	Intergenic	-68071	NM_001024968	Slc46a3
chr12	8299845	8299939	0.179301	10	0.0016232	1	intron (NM_023963, intron 2 of 4)	-intron (NM_023963, intron 2 of 4)	3789	NM_023963	Cdx2
chr13	100299650	100300154	0.172672	13	0.0011329	1	Intergenic	Intergenic	277481	NM_001105734	Dusp10
chr13	100847690	100848327	0.198281	10	7.4676e-06	1	Intergenic	Intergenic	-9361	NM_134410_1	Marc2
chr13	103083166	103083326	0.17782	10	6.6244e-06	1	promoter-TSS (NM_001108858)	-promoter-TSS (NM_001108858)	88	NM_001108858	Ddx3y
chr13	103083382	103083504	0.232144	10	1.2991e-05	1	exon (NM_001108858, exon 1 of 1)	-exon (NM_001108858, exon 1 of 1)	285	NM_001108858	Ddx3y
chr13	103737167	103737265	0.238813	10	2.3676e-05	1	Intergenic	Intergenic	-57445	NM_203336	Esrrg
chr13	106003739	106004019	0.184677	11	0.0016144	1	Intergenic	Intergenic	-1056	NM_001107200	Ptpn14
chr13	107225100	107225236	0.251969	10	3.2169e-05	1	Intergenic	Intergenic	-1324	NM_012912	Atf3
chr13	108987222	108987611	0.16528	10	0.0061504	1	intron (NM_001108859, intron 1 of 7)	-intron (NM_001108859, intron 1 of 7)	444	NM_001108859	Irf6
chr13	110833350	110833816	0.150421	10	0.0007146	1	Intergenic	Intergenic	-44011	NM_001107202	Cd34
chr13	33557726	33557919	0.154944	10	9.9872e-05	1	exon (NM_024395, exon 1 of 2)	-exon (NM_024395, exon 1 of 2)	227	NM_024395	Htr5b
chr13	48591531	48591878	0.207513	10	5.7208e-05	1	Intergenic	Intergenic	-157778	NM_001107180	Ipo9
chr13	67562809	67563130	0.168914	10	0.0039703	1	intron (NM_001105957, intron 3 of 19)	-intron (NM_001105957, intron 3 of 19)	-174959	NM_001017492	Apobec4
chr13	68807839	68807993	0.152513	12	0.0004504	1	promoter-TSS (NM_001077589)	-promoter-TSS (NM_001077589)	53	NM_001077589	Rgs16
chr13	74918484	74918752	0.189337	10	0.00078643	1	Intergenic	Intergenic	49051	NM_001025126	Rfwd2
chr13	79030962	79031044	0.163775	10	5.2151e-06	1	Intergenic	Intergenic	-2122	NM_153821	Prrx1
chr13	8267537	8267917	0.22489	10	6.9855e-06	1	intron (NM_001047873, intron 11 of 23)	-intron (NM_001047873, intron 11 of 23)	553160	NM_001047873	Cntnap5b
chr13	85834215	85834499	0.183626	10	0.0019284	1	intron (NM_031764, intron 1 of 15)	-intron (NM_031764, intron 1 of 15)	12279	NM_031764	Ddr2
chr13	86934480	86934531	0.15846	13	4.8443e-05	1	Intergenic	Intergenic	-3479	NM_001135992	LOC498276
chr13	86953320	86953509	0.150182	10	0.0074623	1	Intergenic	Intergenic	-22388	NM_001135992	LOC498276
chr13	86962618	86962748	0.164442	10	0.0072731	1	Intergenic	Intergenic	-31656	NM_001135992	LOC498276
chr13	95004199	95004574	0.208584	10	0.018455	1	intron (NM_001025762, intron 2 of 8)	-intron (NM_001025762, intron 2 of 8)	211453	NM_001025762	Smyd3
chr13	97394199	97394389	0.254342	10	0.0003579	1	intron (NM_001166578, intron 1 of 5)	-intron (NM_001166578, intron 1 of 5)	414	NM_001166578	Cnih3
chr14	102725484	102725726	0.157677	16	2.5063e-05	1	promoter-TSS (NM_013109)	-promoter-TSS (NM_013109)	-857	NM_013109	Otx1
chr14	107294429	107294686	0.171132	12	1.9353e-05	1	exon (NM_001108366, exon 8 of 10)	-exon (NM_001108366, exon 8 of 10)	83110	NM_001191684	Fancl
chr14	12811290	12811605	0.157417	14	0.0026722	1	Intergenic	Intergenic	-76814	NM_022211	Fgf5
chr14	13796265	13796498	0.230442	10	0.00059402	1	Intergenic	Intergenic	-119061	NM_001012033	Paqr3
chr14	18988934	18989166	0.215709	10	8.7387e-05	1	Intergenic	Intergenic	32339	NM_001025671	Rassf6
chr14	33296561	33296837	0.182726	10	3.1635e-05	1	Intergenic	Intergenic	51516	NM_001008870	Spink2
chr14	3380682	3380863	0.170699	11	0.012381	1	Intergenic	Intergenic	60965	NM_001108352	Cdc7
chr14	34830868	34831009	0.16883	10	0.0018577	1	Intergenic	Intergenic	153880	NM_022264	Kit
chr14	43178775	43179048	0.175082	12	0.00048978	1	intron (NM_001109087, intron 1 of 1)	-intron (NM_001109087, intron 1 of 1)	1146	NM_001109087	Shisa3
chr14	4321147	4321603	0.167282	10	7.4613e-05	1	Intergenic	Intergenic	433222	NM_022956	Barhl2
chr14	43673839	43673986	0.15178	10	0.0025785	1	Intergenic	Intergenic	-156967	NM_021671	Tmem33
chr14	46234764	46235115	0.192279	10	0.0036844	1	Intergenic	Intergenic	-8863	NM_001105742	Klf3
chr14	62271219	62271380	0.176298	10	2.5249e-06	1	Intergenic	Intergenic	199589	NM_001134639	Smim20
chr14	72183623	72183887	0.20706	10	3.0712e-05	1	intron (NM_021751, intron 4 of 26)	-intron (NM_001110137, intron 3 of 23)	51537	NM_001110137	Prom1
chr14	77406438	77407033	0.173533	10	0.00020972	1	Intergenic	Intergenic	-83092	NM_001014135	Wdr1
chr14	77812071	77812269	0.174288	10	0.00022409	1	promoter-TSS (NM_181433)	-promoter-TSS (NM_181433)	-204	NM_181433	Otop1
chr14	78080664	78081013	0.178158	12	4.0243e-06	1	Intergenic	Intergenic	-35797	NM_001012151	Stx18
chr14	7874070	7874647	0.20225	15	8.2909e-06	1	intron (NM_012806, intron 3 of 13)	-intron (NM_001270556, intron 3 of 13)	155055	NM_001270556	Mapk10
chr14	80857373	80857749	0.15725	22	0.00040967	1	intron (NM_031766, intron 1 of 10)	-intron (NM_031766, intron 1 of 10)	190	NM_031766	Cpz
chr14	81855797	81855880	0.218688	10	0.0075573	1	promoter-TSS (NM_001100684)	-promoter-TSS (NM_001100684)	36	NM_001100684	Sh3bp2
chr14	86525703	86525821	0.191216	10	0.00027936	1	promoter-TSS (NM_001100970)	-promoter-TSS (NM_001100970)	14	NM_001100970	Aebp1
chr14	86573943	86574070	0.205541	12	4.4295e-06	1	exon (NM_001270849, exon 10 of 11)	-exon (NM_001270849, exon 10 of 11)	-3885	NM_001106017	Myl7
chr14	86664155	86664546	0.173915	10	0.00014437	1	intron (NM_021739, intron 4 of 20)	-intron (NM_001042354, intron 4 of 20)	44523	NM_031692	Ykt6
chr14	87517583	87517982	0.204672	10	0.00047823	1	Intergenic	Intergenic	100493	NM_020100	Ramp3
chr14	89224273	89224670	0.283671	10	1.7924e-06	1	Intergenic	Intergenic	-55792	NM_001170459	Tns3
chr14	9216561	9216797	0.180998	10	0.0018175	1	intron (NM_031737, intron 1 of 2)	-intron (NM_031737, intron 1 of 2)	1936	NM_031737	Nkx6-1
chr14	9231677	9231773	0.176038	10	3.1308e-06	1	Intergenic	Intergenic	16982	NM_031737	Nkx6-1
chr14	92327428	92327696	0.210294	10	0.032927	1	intron (NM_001025139_1, intron 1 of 5)	-intron (NM_001025139_1, intron 1 of 5)	593	NM_001025139_1	Zpbp
chr14	98110960	98111066	0.162227	10	0.00027083	1	promoter-TSS (NM_001127559)	-promoter-TSS (NM_001127559)	-24	NM_199083	Pno1
chr15	101069794	101069929	0.166568	10	0.00018727	1	intron (NM_001107285, intron 7 of 7)	-intron (NM_001107285, intron 7 of 7)	1152588	NM_001107285	Gpc5
chr15	103863452	103863554	0.181409	10	9.7477e-06	1	Intergenic	Intergenic	-18131	NM_022232	Dnajc3
chr15	106117187	106117301	0.173038	10	0.0024139	1	Intergenic	Intergenic	-63231	NM_001107287	Farp1
chr15	106592287	106592655	0.170768	23	1.2218e-05	1	intron (NM_057121, intron 1 of 21)	-intron (NM_057121, intron 1 of 21)	123	NM_057121	Slc15a1
chr15	107508428	107508590	0.18238	12	1.804e-05	1	intron (NM_001100685, intron 3 of 7)	-intron (NM_001100685, intron 3 of 7)	90418	NM_001108391	Zic5
chr15	2178184	2178462	0.204178	10	0.00050472	1	intron (NM_001109441, intron 2 of 6)	-intron (NM_001109441, intron 2 of 6)	146198	NM_001109441	LOC681383
chr15	22298041	22298214	0.176132	13	2.5543e-06	1	Intergenic	Intergenic	-11371	NM_012827	Bmp4
chr15	24620609	24620835	0.235728	10	4.2028e-05	1	Intergenic	Intergenic	11713	NM_001100566	Otx2
chr15	24630895	24631128	0.158513	12	0.017403	1	intron (NM_001100566, intron 3 of 5)	-intron (NM_001100566, intron 3 of 5)	1423	NM_001100566	Otx2
chr15	3100618	3100841	0.151202	10	8.401e-06	1	intron (NM_012895, intron 9 of 10)	-intron (NM_012895, intron 9 of 10)	358161	NM_012895	Adk
chr15	33924119	33924232	0.160262	13	0.0004481	1	exon (NM_053640, exon 1 of 1)	-exon (NM_053640, exon 1 of 1)	704	NM_053640	Ltb4r2
chr15	39468560	39468793	0.250127	10	0.00091559	1	Intergenic	Intergenic	105702	NM_001107268	Mtmr6
chr15	44789826	44789970	0.190529	10	3.0341e-05	1	Intergenic	Intergenic	-16402	NM_001107271	Zfp395
chr15	46453648	46453899	0.158862	14	0.00050302	1	intron (NM_001107272, intron 1 of 2)	-intron (NM_001107272, intron 1 of 2)	861	NM_001107272	Pnma2
chr15	46777885	46778005	0.152132	10	0.0012827	1	Intergenic	Intergenic	-1275	NM_001108383	Ebf2
chr15	50138728	50138870	0.209768	13	1.8863e-06	1	intron (NM_001108873, intron 1 of 5)	-intron (NM_001108873, intron 1 of 5)	360	NM_001108873	Tnfrsf10b
chr15	50590566	50590738	0.256412	13	0.00011456	1	intron (NM_001005762, intron 13 of 21)	-intron (NM_001005762, intron 13 of 21)	-14781	NM_001007622	Pdlim2
chr15	51028967	51029298	0.168681	15	2.8724e-06	1	intron (NM_001108385, intron 1 of 14)	-intron (NM_001108385, intron 1 of 14)	2985	NM_001108385	Dmtn
chr15	86044277	86044602	0.171887	10	0.00059065	1	Intergenic	Intergenic	333465	NM_001001515	Lmo7
chr16	10474546	10474904	0.150665	10	0.0039569	1	intron (NM_024378, intron 1 of 12)	-intron (NM_024378, intron 1 of 12)	1372	NM_024378	Grid1
chr16	17969823	17970134	0.153579	10	0.0001143	1	Intergenic	Intergenic	-26249	NM_001007684	Klf2
chr16	18122427	18122504	0.197156	16	0.017813	1	intron (NM_012678, intron 1 of 7)	-intron (NM_012678, intron 1 of 7)	490	NM_012678	Tpm4
chr16	18905028	18905123	0.235388	10	2.2595e-05	1	exon (NM_001106069, exon 28 of 28)	-exon (NM_001106069, exon 28 of 28)	-3168	NM_001106068	B3gnt3
chr16	19313234	19313380	0.150144	12	0.0011039	1	exon (NM_019216, exon 2 of 2)	-exon (NM_019216, exon 2 of 2)	2425	NM_019216	Gdf15
chr16	19347114	19347232	0.150389	12	6.568e-05	1	exon (NM_001013880, exon 5 of 11)	-exon (NM_001013880, exon 5 of 11)	968	NM_001013880	Isyna1
chr16	19582582	19582781	0.227508	10	5.1742e-06	1	exon (NM_001044230, exon 7 of 8)	-exon (NM_001044230, exon 7 of 8)	13733	NM_001044240	Gdf1
chr16	19698291	19698596	0.151711	10	5.9617e-06	1	intron (NM_001127590, intron 1 of 7)	-intron (NM_001127590, intron 1 of 7)	1344	NM_001127590	Slc25a42
chr16	20031322	20031417	0.150517	10	0.0032288	1	exon (NM_001107307, exon 8 of 8)	-exon (NM_001107307, exon 8 of 8)	6381	NM_001107307	Cilp2
chr16	26948787	26949459	0.193392	10	0.00048872	1	Intergenic	Intergenic	200531	NM_013128	Cpe
chr16	32057688	32057986	0.202759	15	4.2231e-06	1	intron (NM_198764, intron 10 of 10)	-intron (NM_198764, intron 10 of 10)	-100282	NM_182672	Cbr4
chr16	46928995	46929128	0.243668	10	4.9059e-06	1	intron (NM_001169133, intron 2 of 29)	-intron (NM_001169133, intron 2 of 29)	280291	NM_001169133	Tenm3
chr16	47146057	47146143	0.210479	10	9.3122e-06	1	exon (NM_001169133, exon 30 of 30)	-exon (NM_001169133, exon 30 of 30)	115815	NM_001161512	Dctd
chr16	48066875	48066984	0.219964	10	1.6577e-05	1	Intergenic	Intergenic	120272	NM_001169115	Trappc11
chr16	4878758	4879092	0.208358	11	0.000139	1	intron (NM_175595, intron 2 of 36)	-intron (NM_175595, intron 2 of 36)	180649	NM_175595	Cacna2d3
chr16	49272628	49272770	0.164817	15	0.0021806	1	Intergenic	Intergenic	-80777	NM_053515	Slc25a4
chr16	54690469	54690570	0.183908	10	5.7046e-05	1	intron (NM_001011921, intron 2 of 5)	-intron (NM_001011921, intron 2 of 5)	51974	NM_001011921	Pdgfrl
chr16	5702157	5702424	0.255104	13	1.3103e-05	1	intron (NM_017298, intron 1 of 52)	-intron (NM_017298, intron 1 of 52)	1070	NM_017298	Cacna1d
chr16	5919354	5919697	0.219438	10	0.00016428	1	intron (NM_022592, intron 3 of 14)	-intron (NM_022592, intron 3 of 14)	10767	NM_022592	Tkt
chr16	61859019	61859378	0.194176	14	0.0003395	1	Intergenic	Intergenic	54142	NM_001106085	Dctn6
chr16	62113704	62114101	0.207674	10	0.0015119	1	intron (NM_001271244, intron 5 of 6)	-intron (NM_001271244, intron 5 of 6)	104295	NM_001271244	Rbpms
chr16	62534876	62534907	0.159441	10	0.00036405	1	exon (NM_001191554, exon 2 of 2)	-exon (NM_001191554, exon 2 of 2)	746	NM_001191554	Purg
chr16	6450616	6450689	0.163483	13	0.0055168	1	promoter-TSS (NM_175580)	-promoter-TSS (NM_175580)	-278	NM_175580	Gnl3
chr16	6596013	6596335	0.162262	10	0.00061909	1	Intergenic	Intergenic	36555	NM_001009271	Nt5dc2
chr16	69538881	69539092	0.232087	10	0.0012265	1	Intergenic	Intergenic	-129850	NM_001109425	Zfp703
chr16	73523343	73523464	0.178131	18	0.00078305	1	Intergenic	Intergenic	-85565	NM_001107322	Ank1
chr16	73561926	73562377	0.150269	10	0.00018233	1	intron (NM_001100570, intron 14 of 15)	-intron (NM_001100570, intron 14 of 15)	70407	NM_001100570	Kat6a
chr16	74629567	74629865	0.185717	11	0.0086162	1	intron (NM_012511, intron 1 of 20)	-intron (NM_012511, intron 1 of 20)	21728	NM_012511	Atp7b
chr16	79489411	79489884	0.17188	13	7.6833e-05	1	Intergenic	Intergenic	-56785	NM_001107326	Kbtbd11
chr16	80327073	80327216	0.264879	14	1.2565e-05	1	intron (NM_053901, intron 1 of 15)	-intron (NM_053901, intron 1 of 15)	1069	NM_053901	Dlgap2
chr16	80332612	80332777	0.175654	10	7.5053e-05	1	promoter-TSS (NM_001127680)	-promoter-TSS (NM_001127680)	-509	NM_001127680	Erich1
chr16	82017934	82018140	0.18646	10	1.7764e-05	1	Intergenic	Intergenic	308996	NM_001107323	Tubgcp3
chr16	83092868	83093302	0.245078	13	1.9893e-05	1	intron (NM_001135009, intron 2 of 51)	-intron (NM_001135009, intron 2 of 51)	47902	NM_001135009	Col4a1
chr17	106319	106634	0.191406	10	0.0012485	1	exon (NM_001107330, exon 7 of 7)	-exon (NM_001107330, exon 7 of 7)	9706	NM_001107330	Irx4
chr17	11175772	11176024	0.157928	13	0.00060438	1	Intergenic	Intergenic	135559	NM_001106100	Agtpbp1
chr17	11605160	11605337	0.227309	12	0.0014083	1	intron (NM_012731, intron 13 of 17)	-intron (NM_012731, intron 13 of 17)	206405	NM_012731	Ntrk2
chr17	12212910	12213097	0.166022	12	0.00012571	1	intron (NM_001173436, intron 1 of 3)	-intron (NM_001173436, intron 1 of 3)	786	NM_001173436	RGD1311345
chr17	14371161	14371403	0.17034	17	6.832e-06	1	Intergenic	Intergenic	-38160	NM_001025029	Tifab
chr17	16250883	16251063	0.263931	12	0.00014318	1	Intergenic	Intergenic	17122	NM_001106059	Thoc3
chr17	1913072	1913485	0.155289	10	0.00012958	1	Intergenic	Intergenic	522385	NM_001107331	Irx1
chr17	19479395	19479923	0.164527	12	0.0071461	1	Intergenic	Intergenic	-41202	NM_001105743	Shc3
chr17	21433193	21433403	0.249095	10	2.068e-05	1	Intergenic	Intergenic	-13826	NM_012867	Ninj1
chr17	26948205	26948325	0.251087	10	0.0002881	1	Intergenic	Intergenic	-16757	NM_001305178	Mcur1
chr17	27025092	27025246	0.200113	10	9.6178e-05	1	Intergenic	Intergenic	60147	NM_001305178	Mcur1
chr17	27977754	27978053	0.153525	11	0.00068342	1	Intergenic	Intergenic	-93777	NM_214457	Phactr1
chr17	28487049	28487425	0.162794	10	0.0028404	1	intron (NM_001105751, intron 3 of 11)	-intron (NM_001105751, intron 3 of 11)	89369	NM_001105751	Hivep1
chr17	28951623	28952009	0.168062	10	0.00090002	1	Intergenic	Intergenic	-82311	NM_001177820	LOC100362172
chr17	33142759	33143000	0.15409	10	0.0069783	1	exon (NM_001107348, exon 11 of 13)	-exon (NM_001107348, exon 11 of 13)	80905	NM_001008891	Ssr1
chr17	37086096	37086529	0.155637	10	9.3458e-06	1	Intergenic	Intergenic	-1609	NM_001013886	Tubb2b
chr17	39264767	39264911	0.162609	10	1.7812e-05	1	Intergenic	Intergenic	70190	NM_022858	Foxq1
chr17	53802339	53802493	0.167183	10	5.4684e-06	1	intron (NM_022217, intron 2 of 21)	-intron (NM_022217, intron 2 of 21)	520	NM_022217	Amph
chr17	61982007	61982249	0.179439	10	2.0325e-06	1	Intergenic	Intergenic	71949	NM_053847	Map3k8
chr17	63591127	63591543	0.170097	10	2.1582e-05	1	Intergenic	Intergenic	93411	NM_001012468	Rab18
chr17	65970612	65970718	0.157785	10	0.00078905	1	exon (NM_001044251, exon 1 of 1)	-exon (NM_001044251, exon 1 of 1)	1926	NM_001044251	Fzd8
chr17	66560916	66561194	0.180257	11	0.001864	1	Intergenic	Intergenic	174347	NM_053518	Lyst
chr17	745710	745992	0.159548	23	1.453e-05	1	exon (NM_001039505, exon 3 of 5)	-exon (NM_001039505, exon 3 of 5)	3101	NM_001039505	Irx2
chr17	84141741	84141892	0.158231	10	9.9249e-05	1	Intergenic	Intergenic	-165151	NM_145081	Optn
chr17	8430985	8431134	0.180354	10	0.0070385	1	Intergenic	Intergenic	-500408	NM_181378	Ctsm
chr17	85344099	85344434	0.189957	10	0.00014147	1	Intergenic	Intergenic	-276166	NM_001191821	Frmd4a
chr17	93406632	93406818	0.160994	10	0.00058948	1	Intergenic	Intergenic	-10216	NM_001031660	Msrb2
chr18	116472	116869	0.209739	10	4.9713e-05	1	intron (NM_001135757, intron 1 of 4)	-intron (NM_001135757, intron 1 of 4)	1396	NM_001135757	Fundc2
chr18	12955729	12955981	0.163624	10	0.0018604	1	Intergenic	Intergenic	191635	NM_053588	Rnf138
chr18	16487877	16488119	0.15084	10	0.00025518	1	intron (NM_001271332, intron 1 of 26)	-intron (NM_001271332, intron 1 of 26)	1021	NM_001271332	Fhod3
chr18	26788821	26789015	0.159385	10	0.003202	1	exon (NM_012499, exon 15 of 15)	-exon (NM_012499, exon 15 of 15)	-11331	NM_001106157	Srp19
chr18	26800044	26800138	0.270923	10	0.0030894	1	promoter-TSS (NM_001106157)	-promoter-TSS (NM_001106157)	-158	NM_001106157	Srp19
chr18	2684495	2684592	0.171472	13	0.00031416	1	Intergenic	Intergenic	181333	NM_019185	Gata6
chr18	28280663	28280996	0.256372	10	0.00069287	1	intron (NM_001025636, intron 1 of 3)	-intron (NM_001025636, intron 1 of 3)	398	NM_001025636	Spata24
chr18	28958200	28958427	0.189475	10	0.0011206	1	Intergenic	Intergenic	-129542	NM_001136151	Nrg2
chr18	29200019	29200104	0.181934	10	5.595e-05	1	Intergenic	Intergenic	-1149	NM_001204053	Ankhd1
chr18	29735162	29735334	0.15387	10	0.010978	1	exon (NM_053940, exon 1 of 4)	-exon (NM_053940, exon 1 of 4)	735	NM_053940	Pcdha12
chr18	31167811	31167934	0.192236	10	0.00010424	1	Intergenic	Intergenic	-10919	NM_199493	RGD735029
chr18	31416696	31416832	0.200325	11	4.6557e-05	1	Intergenic	Intergenic	65226	NM_001013059	Ndfip1
chr18	3778110	3778316	0.202191	10	0.002005	1	promoter-TSS (NM_153624)	-promoter-TSS (NM_153624)	-411	NM_153624	Npc1
chr18	48643725	48644220	0.181826	10	0.006759	1	intron (NM_001106135, intron 1 of 14)	-intron (NM_001106135, intron 1 of 14)	1069	NM_001106135	Snx2
chr18	48927876	48928083	0.250354	11	3.9463e-06	1	Intergenic	Intergenic	-28826	NM_001004215	Ppic
chr18	49247869	49248259	0.168744	10	0.00019218	1	intron (NM_001191697, intron 4 of 20)	-intron (NM_001191697, intron 4 of 20)	6958	NM_001191697	Cep120
chr18	58300956	58301338	0.159256	10	0.0001143	1	Intergenic	Intergenic	-116014	NM_012853	Htr4
chr18	62567201	62567372	0.15884	13	0.00031719	1	promoter-TSS (NM_053678)	-promoter-TSS (NM_053678)	-198	NM_053678	Rax
chr18	63774872	63775348	0.160241	10	0.0033381	1	Intergenic	Intergenic	-18624	NM_001108435	Mppe1
chr18	72314227	72314481	0.198426	10	0.0074921	1	intron (NM_030858, intron 3 of 3)	-intron (NM_030858, intron 3 of 3)	19551	NM_030858	Smad7
chr18	73467821	73468013	0.20316	10	7.0679e-05	1	Intergenic	Intergenic	287498	NM_019191	Smad2
chr18	77258172	77258265	0.280752	11	3.0819e-06	1	intron (NM_001107372, intron 1 of 3)	-intron (NM_001107372, intron 1 of 3)	592	NM_001107372	Kcng2
chr18	78429398	78429507	0.246773	10	2.3989e-05	1	Intergenic	Intergenic	444998	NM_012958	Galr1
chr18	78454583	78454808	0.153398	10	8.5293e-05	1	Intergenic	Intergenic	419755	NM_012958	Galr1
chr18	78874714	78874865	0.17362	10	0.00013105	1	promoter-TSS (NM_012958)	-promoter-TSS (NM_012958)	-339	NM_012958	Galr1
chr19	10997207	10997760	0.159646	10	1.0239e-05	1	Intergenic	Intergenic	49430	NM_053523	Herpud1
chr19	14166760	14166943	0.208112	13	0.00011732	1	Intergenic	Intergenic	73582	NM_133568	Rasd2
chr19	15639456	15639658	0.172492	11	0.00031022	1	Intergenic	Intergenic	110857	NM_001030044	Irx5
chr19	15816014	15816119	0.164862	10	1.9534e-06	1	Intergenic	Intergenic	-65653	NM_001030044	Irx5
chr19	17944745	17945083	0.150199	10	0.019525	1	promoter-TSS (NM_001106171)	-promoter-TSS (NM_001106171)	-636	NM_001106171	Tox3
chr19	19279720	19279858	0.155445	12	0.00046684	1	intron (NM_001107415, intron 1 of 2)	-intron (NM_001107415, intron 1 of 2)	906	NM_001107415	Sall1
chr19	19786679	19787044	0.184493	10	0.011001	1	intron (NM_001271381, intron 3 of 9)	-intron (NM_001271381, intron 3 of 9)	46239	NM_001271381	Nkd1
chr19	20109121	20109343	0.268845	10	0.00053839	1	Intergenic	Intergenic	-35371	NM_053396	Adcy7
chr19	20944164	20944392	0.161025	10	0.00014955	1	exon (NM_001109127, exon 3 of 3)	-exon (NM_001109127, exon 3 of 3)	3024	NM_001109127	Cbln1
chr19	25032113	25032370	0.179437	10	4.2272e-05	1	intron (NM_030866, intron 1 of 9)	-intron (NM_030866, intron 1 of 9)	13890	NM_030866	Nfix
chr19	26767573	26768126	0.151909	10	0.0039727	1	intron (NM_001191093, intron 6 of 6)	-intron (NM_001191093, intron 6 of 6)	-95375	NM_001134539	Tbc1d9
chr19	31665930	31666240	0.189024	11	1.1832e-05	1	promoter-TSS (NM_001013890)	-promoter-TSS (NM_001013890)	-85	NM_001013890	Ttc29
chr19	35073955	35074168	0.16745	10	0.00010706	1	exon (NM_001100480, exon 3 of 4)	-exon (NM_001100480, exon 3 of 4)	1189	NM_001100480	Tradd
chr19	35162828	35162920	0.203128	10	0.0020591	1	intron (NM_001191600, intron 1 of 22)	-intron (NM_001191600, intron 1 of 22)	256	NM_001191600	Fhod1
chr19	35526237	35526467	0.156735	19	3.5529e-05	1	Intergenic	Intergenic	6897	NM_001037193	Acd
chr19	35987979	35988116	0.161536	16	0.00010683	1	exon (NM_001107423, exon 2 of 15)	-exon (NM_001107423, exon 2 of 15)	622	NM_001107423	Esrp2
chr19	40769495	40769757	0.2092	10	0.0032571	1	promoter-TSS (NM_001106187)	-promoter-TSS (NM_001106187)	407	NM_001108449	Cog4
chr19	47640468	47640584	0.208044	10	5.3168e-05	1	intron (NM_017168, intron 2 of 6)	-intron (NM_017168, intron 2 of 6)	29663	NM_017168	Plcg2
chr19	47673624	47674079	0.161523	10	0.00027981	1	intron (NM_017168, intron 2 of 6)	-intron (NM_017168, intron 2 of 6)	62989	NM_017168	Plcg2
chr19	47828677	47828814	0.177494	10	0.0011248	1	intron (NM_001271269, intron 1 of 3)	-intron (NM_001271269, intron 1 of 3)	130	NM_001271269	Sdr42e1
chr19	50564616	50565053	0.188917	10	0.00056035	1	Intergenic	Intergenic	99281	NM_001107436	RGD1304884
chr19	50718299	50718508	0.161575	11	0.00085578	1	Intergenic	Intergenic	209264	NM_001106190	Gins2
chr19	5181101	5181233	0.199143	10	2.6503e-06	1	Intergenic	Intergenic	-504695	NM_053393	Cdh8
chr19	52790049	52790188	0.214819	10	3.2122e-05	1	exon (NM_001077200, exon 10 of 51)	-exon (NM_001077200, exon 10 of 51)	24333	NM_001037094	Ctu2
chr19	52959270	52959601	0.187548	11	1.053e-05	1	intron (NM_001108453, intron 1 of 11)	-intron (NM_001108453, intron 1 of 11)	20963	NM_001108453	Cbfa2t3
chr19	52959875	52960201	0.164063	13	4.2591e-06	1	intron (NM_001108453, intron 1 of 11)	-intron (NM_001108453, intron 1 of 11)	20361	NM_001108453	Cbfa2t3
chr19	54178602	54178857	0.15418	10	0.0016079	1	intron (NM_001012166, intron 1 of 12)	-intron (NM_001012166, intron 1 of 12)	2765	NM_001012166	Abcb10
chr19	55312574	55312817	0.162065	10	0.0020365	1	intron (NM_175596, intron 5 of 11)	-intron (NM_175596, intron 5 of 11)	47572	NM_175596	Disc1
chr19	56641597	56641884	0.216288	10	0.00012477	1	Intergenic	Intergenic	221426	NM_152935	Tomm20
chr2	103087356	103087453	0.197528	13	3.9746e-06	1	exon (NM_001108940, exon 1 of 1)	-exon (NM_001108940, exon 1 of 1)	998	NM_001108940	Bhlhe22
chr2	1051552	1051699	0.202372	15	7.168e-05	1	Intergenic	Intergenic	-402252	NM_030836	Erap1
chr2	114973589	114973684	0.196211	12	0.00023286	1	Intergenic	Intergenic	-90961	NM_001106423_1	Mecom
chr2	116639401	116639662	0.182176	19	1.4141e-05	1	exon (NM_053457, exon 1 of 3)	-exon (NM_053457, exon 1 of 3)	200	NM_053457	Cldn11
chr2	117331291	117331368	0.171592	10	3.0768e-05	1	intron (NM_001106423, intron 1 of 1)	-intron (NM_001106423, intron 1 of 1)	36878	NM_001106423	Mecom
chr2	118593758	118593892	0.297979	10	1.9924e-06	1	Intergenic	Intergenic	-46452	NM_133399_1	Pik3ca
chr2	120215023	120215223	0.213812	10	5.4585e-05	1	Intergenic	Intergenic	-60165	NM_001107667	Ccdc39
chr2	127564727	127564867	0.28437	10	0.00074641	1	Intergenic	Intergenic	-132707	NM_001106428	Hspa4l
chr2	140032231	140032694	0.165143	10	0.00089801	1	Intergenic	Intergenic	-87847	NM_138526	Noct
chr2	142589443	142589820	0.176134	10	0.0063986	1	intron (NM_001245978, intron 2 of 23)	-intron (NM_001245978, intron 2 of 23)	14675	NM_001245978	Frem2
chr2	148624081	148624280	0.157798	13	0.00011612	1	Intergenic	Intergenic	-10196	NM_022800	P2ry12
chr2	156887487	156887704	0.155351	10	0.00098192	1	intron (NM_013028, intron 1 of 5)	-intron (NM_013028, intron 1 of 5)	2057	NM_013028	Shox2
chr2	159027222	159027498	0.229443	10	0.0024504	1	promoter-TSS (NM_001108945)	-promoter-TSS (NM_001108945)	-291	NM_001108945	Trim59
chr2	176196356	176196545	0.176153	10	0.0026346	1	Intergenic	Intergenic	62121	NM_001106437	Fhdc1
chr2	180077040	180077287	0.162795	12	0.00058144	1	exon (NM_001033665, exon 4 of 14)	-exon (NM_001033665, exon 4 of 14)	3778	NM_012916	Bcan
chr2	180105636	180105747	0.181399	10	4.2193e-05	1	exon (NM_022285, exon 6 of 7)	-exon (NM_022285, exon 6 of 7)	4421	NM_022285	Hapln2
chr2	181439804	181439898	0.161696	10	0.00012551	1	exon (NM_001109331, exon 2 of 2)	-exon (NM_001109331, exon 2 of 2)	400	NM_001109331	Dpm3
chr2	186529760	186529863	0.158485	10	0.00079295	1	Intergenic	Intergenic	-90548	NM_001004095	S100a11
chr2	190469233	190469387	0.195143	10	3.2028e-05	1	intron (NM_001108949, intron 1 of 14)	-intron (NM_001108949, intron 1 of 14)	201	NM_001108949	Hormad1
chr2	191303908	191304134	0.231722	10	0.00098824	1	Intergenic	Intergenic	-25623	NM_001012080	Hfe2
chr2	193932155	193932400	0.211795	10	9.4666e-06	1	Intergenic	Intergenic	-83624	NM_001106451	Tbx15
chr2	193937626	193937833	0.153821	10	0.0020407	1	Intergenic	Intergenic	-78172	NM_001106451	Tbx15
chr2	196139679	196139826	0.209516	10	2.2123e-06	1	intron (NM_019243, intron 2 of 9)	-intron (NM_019243, intron 2 of 9)	23197	NM_019243	Ptgfrn
chr2	196454532	196454911	0.15004	10	0.0065077	1	intron (NM_012830, intron 1 of 6)	-intron (NM_012830, intron 1 of 6)	-40483	NM_001106455	Igsf3
chr2	200233007	200233143	0.157918	12	0.0044284	1	promoter-TSS (NM_001191848)	-promoter-TSS (NM_001191848)	-73	NM_001191848	Wnt2b
chr2	202141181	202141335	0.26641	10	9.381e-05	1	promoter-TSS (NM_001127485)	-promoter-TSS (NM_001127485)	-155	NM_001127485	Lrif1
chr2	217792687	217792806	0.190191	10	0.0061569	1	Intergenic	Intergenic	32769	NM_001135879	Tmem56
chr2	220255976	220256114	0.152123	13	0.00049765	1	Intergenic	Intergenic	61455	NM_053504	Prss12
chr2	226598900	226599102	0.154455	10	0.0012326	1	intron (NM_019334, intron 3 of 3)	-intron (NM_001042505, intron 2 of 2)	3047	NM_001042505	Pitx2
chr2	227331856	227332087	0.241856	10	0.00044549	1	intron (NM_001108565, intron 1 of 2)	-intron (NM_001108565, intron 1 of 2)	923	NM_001108565	Pla2g12a
chr2	228551271	228551336	0.17136	10	2.3043e-05	1	intron (NM_130429, intron 1 of 10)	-intron (NM_130429, intron 1 of 10)	1041	NM_130429	Lef1
chr2	23355215	23355361	0.160023	10	0.000316	1	Intergenic	Intergenic	116135	NM_001008372	Papd4
chr2	236446682	236446929	0.230543	10	1.3601e-05	1	intron (NM_001004090, intron 1 of 7)	-intron (NM_001004090, intron 1 of 7)	132069	NM_001004090	Tspan5
chr2	244559	244744	0.15468	10	0.00013781	1	Intergenic	Intergenic	-1209226	NM_030836	Erap1
chr2	250650286	250650640	0.154291	18	7.0957e-06	1	Intergenic	Intergenic	-2477	NM_001037210	Gipc2
chr2	250843319	250843563	0.160062	10	0.00022239	1	Intergenic	Intergenic	-42287	NM_001191094	Usp33
chr2	255681581	255681800	0.185236	11	5.9818e-05	1	intron (NM_012704, intron 1 of 2)	-intron (NM_012704, intron 1 of 2)	1000	NM_012704	Ptger3
chr2	26264293	26264586	0.249969	10	4.1346e-05	1	Intergenic	Intergenic	-31270	NM_019223	Ndufs6
chr2	30220337	30220889	0.176777	10	0.017571	1	Intergenic	Intergenic	117486	NM_001107648	Ptcd2
chr2	32655141	32655304	0.209019	10	0.0012086	1	intron (NM_013005, intron 1 of 13)	-intron (NM_013005, intron 1 of 13)	20127	NM_013005	Pik3r1
chr2	43569286	43569570	0.205017	10	4.6434e-05	1	Intergenic	Intergenic	-62241	NM_001270039	Ankrd55
chr2	44437148	44437500	0.203782	10	4.2319e-05	1	Intergenic	Intergenic	-9721	NM_001106411	Gpx8
chr2	45444809	45445004	0.151204	10	0.00076283	1	Intergenic	Intergenic	-365578	NM_031750	Hspb3
chr2	51960019	51960236	0.157706	15	0.0011104	1	Intergenic	Intergenic	-115494	NM_001100698	Zfp131
chr2	52006405	52006513	0.176773	10	0.0074862	1	Intergenic	Intergenic	-161825	NM_001100698	Zfp131
chr2	52063424	52063730	0.16732	14	0.0042751	1	Intergenic	Intergenic	-218943	NM_001100698	Zfp131
chr2	52066036	52066133	0.262702	10	2.0187e-05	1	Intergenic	Intergenic	-221451	NM_001100698	Zfp131
chr2	52121841	52121975	0.224887	11	2.3319e-06	1	Intergenic	Intergenic	-277274	NM_001100698	Zfp131
chr2	58050874	58050953	0.209996	16	1.602e-05	1	Intergenic	Intergenic	296757	NM_019225	Slc1a3
chr2	58299273	58299562	0.208851	11	5.5074e-05	1	intron (NM_001289941, intron 2 of 8)	-intron (NM_001289941, intron 2 of 8)	48253	NM_019225	Slc1a3
chr2	62453186	62453678	0.160056	10	0.0030913	1	Intergenic	Intergenic	117416	NM_001107655	Drosha
chr2	62615599	62615715	0.157269	10	2.8224e-05	1	intron (NM_012927, intron 2 of 20)	-intron (NM_012927, intron 2 of 20)	87377	NM_012927	Cdh6
chr2	79547083	79547243	0.156036	10	0.0057151	1	intron (NM_001037648, intron 5 of 6)	-intron (NM_001037648, intron 5 of 6)	21969	NM_001037648	Fam105a
chr20	11086849	11087063	0.163186	10	0.00045331	1	intron (NM_001011559, intron 20 of 31)	-intron (NM_001011559, intron 20 of 31)	-20189	NM_145679	Lrrc3
chr20	11403942	11404083	0.165267	15	0.0019196	1	intron (NM_001024295, intron 1 of 3)	-intron (NM_001024295, intron 1 of 3)	497	NM_001024295	Sumo3
chr20	13833317	13833466	0.192118	10	0.0017842	1	intron (NM_053294, intron 1 of 2)	-intron (NM_053294, intron 1 of 2)	739	NM_053294	Adora2a
chr20	1416154	1416412	0.166677	12	0.0093124	1	exon (NM_022921, exon 2 of 7)	-exon (NM_022921, exon 2 of 7)	409	NM_022921	RT1-M3-1
chr20	1554764	1555025	0.165277	10	0.0026496	1	intron (NM_031028, intron 22 of 22)	-intron (NM_031028, intron 22 of 22)	12069	NM_212493	Olr1750
chr20	18415465	18415926	0.171025	10	0.00020555	1	intron (NM_001108531, intron 2 of 19)	-intron (NM_001108531, intron 2 of 19)	127617	NM_001108531	Bicc1
chr20	22369843	22370038	0.285475	10	1.7025e-05	1	intron (NM_001106386, intron 3 of 7)	-intron (NM_001106386, intron 3 of 7)	55848	NM_001106386	Reep3
chr20	27217217	27217566	0.156793	10	0.00012458	1	Intergenic	Intergenic	29327	NM_001013907_1	Dnajb12
chr20	27999534	28000350	0.171043	10	0.0012766	1	intron (NM_053644, intron 1 of 66)	-intron (NM_053644, intron 1 of 66)	16203	NM_053644	Cdh23
chr20	28733337	28733747	0.269299	10	3.5064e-06	1	Intergenic	Intergenic	-14860	NM_001034128	Pald1
chr20	29028512	29028896	0.164748	13	0.001094	1	intron (NM_001100834, intron 4 of 10)	-intron (NM_001100834, intron 4 of 10)	13057	NM_001100834	Ppa1
chr20	29288927	29289424	0.161876	10	3.1028e-05	1	intron (NM_001109172, intron 3 of 40)	-intron (NM_001109172, intron 3 of 40)	59575	NM_001109172	Col13a1
chr20	3186550	3186699	0.154146	13	5.8385e-05	1	intron (NM_012645_1, intron 6 of 7)	-intron (NM_012645_1, intron 6 of 7)	-7640	NM_001166022	Ddr1
chr20	4196011	4196206	0.151773	10	0.00012497	1	intron (NM_001002809, intron 8 of 16)	-intron (NM_001002809, intron 8 of 16)	3927	NM_001002809	Atf6b
chr20	44306999	44307122	0.167137	10	0.0012104	1	intron (NM_138831, intron 1 of 5)	-intron (NM_138831, intron 1 of 5)	18271	NM_138831	Slc16a10
chr20	46190091	46190372	0.165707	10	6.4694e-05	1	intron (NM_001106395, intron 2 of 3)	-intron (NM_001106395, intron 2 of 3)	72586	NM_001106395	Foxo3
chr20	46445307	46445461	0.230628	10	3.5293e-06	1	Intergenic	Intergenic	-132969	NM_001029925	Ostm1
chr20	46510353	46510780	0.20445	12	1.8336e-05	1	Intergenic	Intergenic	-67786	NM_001029925	Ostm1
chr20	46794396	46795104	0.162874	10	0.0046989	1	intron (NM_001107638, intron 1 of 7)	-intron (NM_001107638, intron 1 of 7)	23220	NM_001107638	Scml4
chr20	4769293	4769584	0.200308	10	0.00016507	1	Intergenic	Intergenic	-9791	NM_001008846	RT1-DOb
chr20	48412349	48412719	0.283022	10	3.1777e-05	1	Intergenic	Intergenic	47314	NM_001107639	Prdm1
chr20	4864884	4864966	0.159989	12	0.012293	1	exon (NM_212495, exon 1 of 12)	-exon (NM_212495, exon 1 of 12)	319	NM_212495	Brd2
chr20	4913419	4913842	0.250467	10	0.00020072	1	Intergenic	Intergenic	-5864	NM_001008848	RT1-Ha
chr20	5324385	5324701	0.162442	10	0.00031907	1	intron (NM_013138, intron 11 of 58)	-intron (NM_013138, intron 11 of 58)	32113	NM_013138	Itpr3
chr20	5460064	5460313	0.162299	10	4.0259e-05	1	Intergenic	Intergenic	-8437	NM_001110056	Mln
chr20	6514927	6515318	0.177661	10	0.00013821	1	intron (NM_013141, intron 2 of 7)	-intron (NM_013141, intron 2 of 7)	36015	NM_013141	Ppard
chr20	6537960	6538190	0.292812	10	2.9344e-06	1	intron (NM_013141, intron 3 of 7)	-intron (NM_013141, intron 3 of 7)	-17784	NM_001191718	Fance
chr20	7191562	7191850	0.158492	14	0.00074807	1	Intergenic	Intergenic	52322	NM_001191841	Pnpla1
chr20	7640343	7640770	0.159984	11	0.00067965	1	intron (NM_001170481, intron 2 of 6)	-intron (NM_001170481, intron 2 of 6)	4275	NM_001170481	Pi16
chr20	7643919	7644436	0.18079	13	5.9657e-05	1	intron (NM_001170481, intron 5 of 6)	-intron (NM_001170481, intron 5 of 6)	7896	NM_001170481	Pi16
chr20	8713975	8714036	0.209353	10	0.00060909	1	intron (NM_001013073, intron 3 of 7)	-intron (NM_001013073, intron 3 of 7)	163209	NM_001013073	Btbd9
chr20	9282640	9282758	0.160736	10	3.3522e-06	1	Intergenic	Intergenic	56818	NM_012728	Glp1r
chr20	9688835	9689037	0.162128	10	3.649e-06	1	promoter-TSS (NM_001011944)	-promoter-TSS (NM_001011944)	-725	NM_001011944	Slc37a1
chr20	9868671	9868996	0.178021	14	0.00056815	1	intron (NM_138543, intron 5 of 17)	-intron (NM_138543, intron 5 of 17)	52934	NM_138543	Pde9a
chr3	106273554	106273797	0.212833	10	0.00016007	1	promoter-TSS (NM_001107763)	-promoter-TSS (NM_001107763)	-554	NM_001107763	Ltk
chr3	106308671	106308999	0.162939	10	0.00071694	1	promoter-TSS (NM_017092)	-promoter-TSS (NM_017092)	-836	NM_017092	Tyro3
chr3	10754366	10754554	0.213285	13	1.0306e-05	1	Intergenic	Intergenic	-32525	NM_001108952	Exosc2
chr3	10926807	10926920	0.292588	10	5.2584e-06	1	intron (NM_001107829, intron 4 of 6)	-intron (NM_001107829, intron 4 of 6)	-14349	NM_198200	Qrfp
chr3	115044860	115045071	0.154655	13	0.00088825	1	promoter-TSS (NM_138857)	-promoter-TSS (NM_138857)	21	NM_138857	Prom2
chr3	11556559	11556737	0.178603	10	0.00087805	1	Intergenic	Intergenic	-7110	NM_145677	Slc25a25
chr3	118877561	118877743	0.188991	10	3.8101e-06	1	exon (NM_001039024, exon 7 of 7)	-exon (NM_001039024, exon 7 of 7)	3559	NM_001039024	Spef1
chr3	131927354	131927472	0.251497	12	8.4686e-05	1	intron (NM_012746, intron 1 of 11)	-intron (NM_012746, intron 1 of 11)	1765	NM_012746	Pcsk2
chr3	13690558	13690713	0.196128	12	0.00011204	1	Intergenic	Intergenic	-92983	NM_013083	Hspa5
chr3	141330314	141330750	0.150564	10	0.010492	1	promoter-TSS (NM_001109546)	-promoter-TSS (NM_001109546)	-117	NM_001109546	Vsx1
chr3	142744904	142745069	0.247683	10	3.2721e-06	1	promoter-TSS (NM_001025060)	-promoter-TSS (NM_001025060)	-107	NM_001025060	LOC502684
chr3	148243129	148243817	0.16638	14	0.00016019	1	Intergenic	Intergenic	-25850	NR_073089	Nnat
chr3	148250523	148250780	0.15481	10	0.00020025	1	Intergenic	Intergenic	-18671	NR_073089	Nnat
chr3	153479604	153479864	0.192823	10	3.0541e-05	1	Intergenic	Intergenic	-307658	NM_001108603	Ptprt
chr3	154394670	154394878	0.198136	10	0.00019315	1	Intergenic	Intergenic	-12276	NM_001107799	Fitm2
chr3	156034405	156034715	0.220795	10	1.5093e-05	1	intron (NM_134363, intron 22 of 26)	-intron (NM_134363, intron 22 of 26)	28543	NM_134363	Slc12a5
chr3	156235586	156236002	0.180222	12	6.7155e-05	1	intron (NM_019161, intron 1 of 9)	-intron (NM_019161, intron 1 of 9)	39746	NM_019161	Cdh22
chr3	156924500	156925725	0.150908	18	0.0014917	1	intron (NM_001100838, intron 2 of 21)	-intron (NM_001100838, intron 2 of 21)	32635	NM_001100838	Zmynd8
chr3	156931947	156932095	0.169704	12	0.00063726	1	intron (NM_001100838, intron 2 of 21)	-intron (NM_001100838, intron 2 of 21)	25727	NM_001100838	Zmynd8
chr3	158341011	158341277	0.171262	10	7.559e-05	1	intron (NM_013186, intron 1 of 25)	-intron (NM_013186, intron 1 of 25)	1279	NM_013186	Kcnb1
chr3	160003309	160003413	0.249326	10	4.6229e-06	1	promoter-TSS (NM_001106546)	-promoter-TSS (NM_001106546)	-317	NM_001106546	Zfp93
chr3	160138032	160138253	0.172545	13	2.9216e-06	1	Intergenic	Intergenic	-93503	NM_001012093	Zfp64
chr3	161033237	161033370	0.178106	10	8.4681e-05	1	Intergenic	Intergenic	127874	NM_001107813	Zfp217
chr3	161149690	161150195	0.211974	10	0.00011851	1	TTS (NM_001107813)	-TTS (NM_001107813)	11235	NM_001107813	Zfp217
chr3	163305428	163305665	0.186914	10	2.4821e-05	1	promoter-TSS (NM_001191744)	-promoter-TSS (NM_001191744)	-172	NM_001191744	Cass4
chr3	163326415	163326642	0.199963	10	5.6927e-05	1	exon (NM_001191744, exon 2 of 7)	-exon (NM_001191744, exon 2 of 7)	20810	NM_001191744	Cass4
chr3	163403894	163404284	0.173359	10	5.7176e-05	1	Intergenic	Intergenic	21985	NM_001106548	Fam209a
chr3	163796836	163797271	0.179904	10	0.0012808	1	intron (NM_001191856, intron 1 of 6)	-intron (NM_001191856, intron 1 of 6)	2513	NM_001191856	Bmp7
chr3	164684463	164684722	0.204587	10	1.6928e-05	1	Intergenic	Intergenic	52205	NM_021847	Vapb
chr3	169537119	169537339	0.165105	12	1.7948e-05	1	exon (NM_133608, exon 8 of 12)	-exon (NM_133608, exon 8 of 12)	16641	NM_133608	Slco4a1
chr3	169550604	169551077	0.16785	13	0.00022089	1	Intergenic	Intergenic	-16647	NM_001108967	Ntsr1
chr3	170239827	170239970	0.183964	10	0.0012227	1	intron (NM_133322, intron 11 of 15)	-intron (NM_133322, intron 11 of 15)	42988	NM_133322	Kcnq2
chr3	170826461	170826708	0.153507	12	3.1595e-05	1	Intergenic	Intergenic	-4323	NM_001024781	Sox18
chr3	18203030	18203453	0.168993	10	2.4025e-06	1	Intergenic	Intergenic	73787	NM_001106571	Lhx2
chr3	2636747	2636979	0.205977	11	8.9519e-05	1	intron (NM_001134881, intron 3 of 18)	-intron (NM_001134881, intron 3 of 18)	13945	NM_001134881	Psd4
chr3	2785506	2785734	0.157836	10	0.00060035	1	Intergenic	Intergenic	-58819	NM_031141	Pax8
chr3	3007776	3008484	0.208381	12	0.00037478	1	intron (NM_147141, intron 6 of 45)	-intron (NM_001195199, intron 6 of 46)	31535	NM_001195199	Cacna1b
chr3	35589581	35589924	0.172145	15	0.0010992	1	TTS (NM_001044276)	-TTS (NM_001044276)	1830	NM_001044276	Rprm
chr3	3793427	3793549	0.215784	13	0.0066582	1	promoter-TSS (NM_001109197)	-promoter-TSS (NM_001109197)	15	NM_001109197	Tmem141
chr3	40632670	40632909	0.295332	10	2.087e-06	1	intron (NM_001107732, intron 12 of 12)	-intron (NM_001107732, intron 12 of 12)	140788	NM_001106481	Upp2
chr3	41542992	41543501	0.187478	10	6.6807e-06	1	intron (NM_001002854, intron 18 of 25)	-intron (NM_001002854, intron 18 of 25)	59670	NM_001014179	Wdsub1
chr3	4678129	4678325	0.241493	10	0.00070283	1	promoter-TSS (NM_001105721)	-promoter-TSS (NM_001105721)	-587	NM_001105721	Notch1
chr3	57275647	57276147	0.193991	10	0.0049415	1	Intergenic	Intergenic	-7785	NM_001105886	Hoxd13
chr3	57364698	57364881	0.152152	10	0.00095856	1	Intergenic	Intergenic	-13049	NM_001105884	Hoxd1
chr3	57902517	57902736	0.239139	10	0.00011908	1	Intergenic	Intergenic	441727	NM_001008286	Mtx2
chr3	5960006	5960229	0.16586	10	0.029106	1	intron (NM_001134517, intron 3 of 4)	-intron (NM_001134517, intron 3 of 4)	6811	NM_001134517	Tmem8c
chr3	6971096	6971273	0.210843	10	4.7842e-06	1	TTS (NM_134452)	-TTS (NM_134452)	48181	NM_053634	Fcnb
chr3	74900756	74900997	0.181629	10	0.00022731	1	intron (NM_017269, intron 1 of 19)	-intron (NM_017269, intron 1 of 19)	34733	NM_017269	Ptprj
chr3	75143699	75143819	0.195423	10	3.4055e-05	1	Intergenic	Intergenic	32755	NM_001013159	Fnbp4
chr3	75143875	75144073	0.181311	10	2.5028e-05	1	Intergenic	Intergenic	32970	NM_001013159	Fnbp4
chr3	75553722	75554509	0.167393	10	0.025215	1	Intergenic	Intergenic	-3323	NM_031627	Nr1h3
chr3	760846	761770	0.22967	10	7.4912e-06	1	Intergenic	Intergenic	518629	NM_001024308	LOC499742
chr3	77897290	77897718	0.178816	13	1.4205e-05	1	Intergenic	Intergenic	-21740	NM_031797	Cd82
chr3	84406447	84406627	0.191224	10	0.0019179	1	Intergenic	Intergenic	1933964	NM_001047953	LOC499843
chr3	89355754	89355852	0.214181	10	3.842e-06	1	promoter-TSS (NM_001037358)	-promoter-TSS (NM_001037358)	38	NM_001244780	Lmo2
chr3	91123961	91124197	0.164773	10	0.00074272	1	Intergenic	Intergenic	-3526	NM_013001	Pax6
chr4	102403923	102404037	0.287977	10	1.2529e-05	1	Intergenic	Intergenic	1556594	NM_001108632	Rpia
chr4	105358033	105358380	0.173052	10	0.00046815	1	Intergenic	Intergenic	-15178	NM_031337	St3gal5
chr4	122309765	122309924	0.184643	10	5.251e-06	1	Intergenic	Intergenic	7133	NM_001109248	Dnajb8
chr4	123296727	123297109	0.176794	15	2.921e-06	1	Intergenic	Intergenic	301596	NM_053534	Tpra1
chr4	124915498	124915792	0.245881	10	0.0019128	1	Intergenic	Intergenic	-96281	NM_001008898	V1ra14
chr4	141463654	141463797	0.151314	10	5.0327e-05	1	intron (NM_053879, intron 2 of 23)	-intron (NM_053879, intron 2 of 23)	264280	NM_053879	Cntn4
chr4	149386540	149386738	0.17561	15	5.558e-06	1	exon (NM_001309463, exon 4 of 4)	-exon (NM_001309463, exon 4 of 4)	7168	NM_001309463	Prrt3
chr4	154364711	154365022	0.171703	10	2.2627e-05	1	Intergenic	Intergenic	66182	NM_001106616	Csgalnact2
chr4	161282877	161283543	0.177764	12	0.00017155	1	exon (NM_017008, exon 5 of 8)	-exon (NM_017008, exon 5 of 8)	2877	NM_017008	Gapdh
chr4	164188684	164189016	0.162279	10	6.3078e-06	1	intron (NM_001271385, intron 1 of 8)	-intron (NM_001271385, intron 1 of 8)	28668	NM_001271385	Prmt8
chr4	173913741	173914032	0.236448	10	4.2762e-05	1	promoter-TSS (NM_012862)	-promoter-TSS (NM_012862)	30	NM_012862	Mgp
chr4	174237984	174238097	0.24729	12	5.413e-06	1	Intergenic	Intergenic	-138355	NM_017336	Ptpro
chr4	174376407	174376511	0.168033	12	1.9429e-06	1	promoter-TSS (NM_017336)	-promoter-TSS (NM_017336)	63	NM_017336	Ptpro
chr4	183137526	183137822	0.173658	12	0.0045822	1	Intergenic	Intergenic	-60013	NM_001191980	Lmntd1
chr4	185138480	185138697	0.180103	10	0.0002242	1	intron (NM_001014061, intron 1 of 9)	-intron (NM_001014061, intron 1 of 9)	35315	NM_001014061	Ccdc91
chr4	2473881	2474055	0.162258	14	0.00032456	1	intron (NM_001109214, intron 1 of 1)	-intron (NM_001109214, intron 1 of 1)	1761	NM_001109214	En2
chr4	25033339	25033558	0.179467	10	0.0019678	1	promoter-TSS (NM_001107846)	-promoter-TSS (NM_001107846)	-727	NM_001107846	Steap2
chr4	2519416	2519703	0.155094	10	0.00025288	1	Intergenic	Intergenic	-43831	NM_001109214	En2
chr4	2525615	2525755	0.214723	10	0.0012682	1	Intergenic	Intergenic	-49956	NM_001109214	En2
chr4	44722587	44722695	0.210266	14	0.0016962	1	intron (NM_001106585, intron 1 of 3)	-intron (NM_001106585, intron 1 of 3)	228	NM_001106585	Lsm8
chr4	49656376	49656562	0.218527	10	2.375e-05	1	Intergenic	Intergenic	-11998	NM_001109224	Fezf1
chr4	50205717	50205792	0.209842	10	5.2118e-06	1	Intergenic	Intergenic	137681	NM_023994	Tas2r118
chr4	55704707	55704791	0.15825	10	0.029143	1	intron (NM_022694, intron 15 of 22)	-intron (NM_022694, intron 15 of 22)	-2905	NM_001037336	Lrrc4
chr4	5635330	5635717	0.206512	12	2.1001e-05	1	intron (NM_184051, intron 1 of 11)	-intron (NM_184051, intron 1 of 11)	14532	NM_184051	Prkag2
chr4	5952934	5953125	0.161496	11	0.0010417	1	intron (NM_001011966, intron 2 of 13)	-intron (NM_001011966, intron 2 of 13)	7259	NR_032287	Mir671
chr4	66232487	66232748	0.16022	10	0.0042263	1	intron (NM_001044233, intron 1 of 4)	-intron (NM_001044233, intron 1 of 4)	410	NM_001044233	Clec2l
chr4	6623908	6624148	0.156304	10	0.00065387	1	Intergenic	Intergenic	36370	NR_110709	LOC100909675
chr4	77345576	77345805	0.1806	10	0.00030046	1	Intergenic	Intergenic	45719	NM_001126296	Tra2a
chr4	80520168	80520310	0.249017	14	1.5235e-05	1	Intergenic	Intergenic	-2718	NM_001109233	Hoxa9
chr4	86171682	86171886	0.240224	10	5.5725e-05	1	promoter-TSS (NM_001009519)	-promoter-TSS (NM_001009519)	-833	NM_001009519	Vom1r70
chr5	101753964	101754492	0.1973	11	0.00029602	1	Intergenic	Intergenic	5223	NM_001115031	Cer1
chr5	108916215	108916300	0.171783	10	0.0025798	1	exon (NM_031550, exon 1 of 4)	-exon (NM_031550, exon 1 of 4)	122	NM_031550	Cdkn2a
chr5	117997253	117997584	0.179331	10	5.7321e-05	1	Intergenic	Intergenic	-167822	NM_012988	Nfia
chr5	118084365	118084655	0.176401	12	0.00032677	1	Intergenic	Intergenic	-80731	NM_012988	Nfia
chr5	127985943	127986180	0.216413	10	0.00026114	1	Intergenic	Intergenic	-1918	NM_053358	Ssbp3
chr5	128600284	128600700	0.254078	10	3.287e-05	1	Intergenic	Intergenic	130728	NM_001025023	Ndc1
chr5	134736991	134737130	0.165749	10	0.0012365	1	Intergenic	Intergenic	549487	NM_134339	Foxe3
chr5	138480597	138480835	0.167051	10	2.4739e-06	1	intron (NM_031697, intron 4 of 11)	-intron (NM_031697, intron 4 of 11)	-86466	NM_053397	Artn
chr5	142490217	142490445	0.161181	19	0.0029204	1	promoter-TSS (NM_017357)	-promoter-TSS (NM_017357)	-131	NM_017357	Hpcal4
chr5	144138060	144138249	0.155567	10	5.0816e-06	1	exon (NM_001108677, exon 2 of 11)	-exon (NM_001108677, exon 2 of 11)	2481	NM_001108677	Mtf1
chr5	145658957	145659193	0.163533	10	1.6719e-05	1	Intergenic	Intergenic	28630	NM_001008376	Trappc3
chr5	146148286	146148477	0.168133	10	0.0031457	1	intron (NM_001191764, intron 2 of 6)	-intron (NM_001191764, intron 2 of 6)	1014	NM_001191764	Tfap2e
chr5	148197196	148197351	0.170018	10	7.3826e-05	1	Intergenic	Intergenic	-32909	NM_001108003	Rnf19b
chr5	148584684	148584855	0.179015	13	2.1917e-05	1	exon (NM_001109265, exon 3 of 3)	-exon (NM_001109265, exon 3 of 3)	5476	NM_001109265	Zbtb8b
chr5	150191779	150191936	0.24476	10	9.4706e-06	1	Intergenic	Intergenic	386214	NM_001006979	Matn1
chr5	151874898	151875073	0.219297	10	0.00017847	1	intron (NM_001107909, intron 24 of 28)	-intron (NM_001107909, intron 24 of 28)	10497	NM_001107909	Map3k6
chr5	152027312	152027381	0.167798	12	0.00072692	1	Intergenic	Intergenic	74619	NM_001134956	Ahdc1
chr5	152038403	152038773	0.152719	11	0.0071316	1	intron (NM_001134956, intron 5 of 5)	-intron (NM_001134956, intron 5 of 5)	63378	NM_001134956	Ahdc1
chr5	153183024	153183505	0.161111	15	0.00013662	1	Intergenic	Intergenic	25627	NM_177932	Pafah2
chr5	153339010	153339259	0.151334	10	0.013742	1	intron (NM_001108687, intron 5 of 11)	-intron (NM_001108687, intron 5 of 11)	-47142	NM_001013935	Mtfr1l
chr5	153415593	153416043	0.275099	10	0.00012508	1	intron (NM_001108687, intron 1 of 11)	-intron (NM_001108687, intron 1 of 11)	43968	NM_001108687	Man1c1
chr5	153522106	153522497	0.201083	10	0.00015983	1	intron (NM_001109271, intron 1 of 8)	-intron (NM_001109271, intron 1 of 8)	5221	NM_001109271	Ldlrap1
chr5	153624426	153624670	0.224273	10	0.0012462	1	intron (NM_001025699, intron 2 of 10)	-intron (NM_001025699, intron 2 of 10)	1584	NM_001025699	Tmem57
chr5	153748167	153748320	0.216668	14	2.6558e-06	1	Intergenic	Intergenic	40590	NM_133417	Syf2
chr5	153783023	153783545	0.15945	14	4.8939e-05	1	Intergenic	Intergenic	75630	NM_133417	Syf2
chr5	153948410	153948734	0.221308	10	3.1294e-05	1	Intergenic	Intergenic	-1544	NM_130425	Runx3
chr5	153948888	153949232	0.218814	14	1.9938e-05	1	Intergenic	Intergenic	-1056	NM_130425	Runx3
chr5	154924784	154925035	0.168846	10	7.4416e-05	1	Intergenic	Intergenic	-9228	NM_013058	Id3
chr5	155208671	155208914	0.153126	10	0.033002	1	Intergenic	Intergenic	-11957	NM_030830	Luzp1
chr5	156990791	156990946	0.167057	10	0.02034	1	Intergenic	Intergenic	-5801	NM_199108	Hp1bp3
chr5	157790534	157790606	0.1745	10	0.00028006	1	exon (NM_001109592, exon 1 of 1)	-exon (NM_001109592, exon 1 of 1)	124	NM_001109592	Rnf186
chr5	158417896	158418380	0.169182	10	1.775e-05	1	intron (NM_001134703, intron 7 of 7)	-intron (NM_001134703, intron 7 of 7)	13798	NM_001134703	Iffo2
chr5	158646240	158646261	0.2274	11	9.106e-05	1	intron (NM_001191984, intron 1 of 8)	-intron (NM_001191984, intron 1 of 8)	1802	NM_001191984	Pax7
chr5	159673185	159673444	0.155189	10	4.2497e-05	1	exon (NM_019332, exon 16 of 16)	-exon (NM_019332, exon 16 of 16)	-4011	NM_017230	Padi3
chr5	161122911	161123040	0.212912	10	0.00061238	1	intron (NM_001014070, intron 1 of 7)	-intron (NM_001014070, intron 1 of 7)	-134398	NM_001109273	Tmem51
chr5	162463792	162463927	0.176982	10	0.0045731	1	Intergenic	Intergenic	135834	NM_001024986	RGD1306186
chr5	165012235	165012381	0.168986	10	0.00045685	1	intron (NM_053827, intron 1 of 16)	-intron (NM_053827, intron 1 of 16)	275	NM_053827	Plod1
chr5	165600284	165600689	0.211459	10	1.8212e-06	1	intron (NM_019906, intron 30 of 57)	-intron (NM_019906, intron 30 of 57)	69080	NM_019906	Mtor
chr5	166031523	166031631	0.16407	10	0.0025528	1	Intergenic	Intergenic	143075	NM_172063	Pex14
chr5	166211680	166211784	0.365658	10	9.6273e-06	1	intron (NM_001204879, intron 1 of 4)	-intron (NM_001204879, intron 1 of 4)	198	NM_001204879	Apitd1
chr5	166441389	166441752	0.229157	10	1.1839e-05	1	intron (NM_001271198, intron 10 of 26)	-intron (NM_001271198, intron 10 of 26)	-59789	NM_057200	Kif1b
chr5	166914181	166914487	0.163303	10	0.011696	1	Intergenic	Intergenic	-52809	NM_001127574	Slc25a33
chr5	166923168	166923748	0.156817	14	2.8071e-05	1	Intergenic	Intergenic	-61933	NM_001127574	Slc25a33
chr5	167003403	167003501	0.261282	10	8.4728e-06	1	Intergenic	Intergenic	22127	NM_001107994	Spsb1
chr5	167037261	167037622	0.200329	10	0.00053812	1	Intergenic	Intergenic	-11863	NM_001107994	Spsb1
chr5	169126849	169127345	0.185256	10	1.7729e-06	1	Intergenic	Intergenic	-36210	NM_001108694	Dnajc11
chr5	169337193	169337363	0.200118	10	0.0010554	1	exon (NM_201272, exon 14 of 22)	-exon (NM_201272, exon 14 of 22)	-7417	NM_001137644	Tnfrsf25
chr5	169570205	169570493	0.165776	15	0.00029703	1	promoter-TSS (NM_001271226)	-promoter-TSS (NM_001271226)	-433	NM_001271226	Chd5
chr5	169802318	169802517	0.211985	10	3.5192e-05	1	Intergenic	Intergenic	91380	NM_001037650	Nphp4
chr5	169926557	169926977	0.28323	10	8.7559e-06	1	Intergenic	Intergenic	215729	NM_001037650	Nphp4
chr5	170161996	170162099	0.161195	14	5.099e-05	1	Intergenic	Intergenic	451010	NM_001037650	Nphp4
chr5	170812112	170812306	0.176827	10	0.0055695	1	TTS (NM_001191063)	-TTS (NM_001191063)	211	NM_001163723	Smim1
chr5	171536171	171536796	0.153793	13	0.013087	1	Intergenic	Intergenic	-61319	NM_001013937	Actrt2
chr5	172432226	172432373	0.180484	10	0.0074568	1	exon (NM_001107998, exon 1 of 9)	-exon (NM_001107998, exon 1 of 9)	586	NM_001107998	Slc35e2b
chr5	29787802	29787911	0.164913	10	1.2099e-05	1	Intergenic	Intergenic	-123820	NM_022302	Necab1
chr5	36423264	36423354	0.1555	18	4.2812e-05	1	Intergenic	Intergenic	-42181	NM_001100472	Ccnc
chr5	44680330	44680602	0.166431	10	3.2318e-05	1	Intergenic	Intergenic	-47571	NM_134331	Epha7
chr5	59235386	59235499	0.185657	10	0.00077207	1	Intergenic	Intergenic	4558	NM_001008513	Ccl21
chr5	60787605	60787895	0.181887	10	0.0028518	1	intron (NM_001108662, intron 1 of 17)	-intron (NM_001108662, intron 1 of 17)	627	NM_001108662	Melk
chr5	62759532	62759751	0.224898	12	0.00019635	1	Intergenic	Intergenic	-8871	NM_001106656	Xpa
chr5	66310728	66310991	0.190889	11	7.104e-05	1	Intergenic	Intergenic	-14689	NM_012496	Aldob
chr5	75221250	75221566	0.153213	10	0.00028997	1	Intergenic	Intergenic	76140	NR_102365	LOC100910620
chr5	75620253	75620715	0.187237	10	0.00067151	1	intron (NM_001305995, intron 3 of 5)	-intron (NM_001305995, intron 3 of 5)	101651	NM_001305995	Palm2
chr5	99552920	99553221	0.175901	12	1.8763e-05	1	Intergenic	Intergenic	34765	NM_001106664	Tyrp1
chr6	10204606	10204837	0.186812	10	0.0004066	1	intron (NM_023090, intron 1 of 16)	-intron (NM_023090, intron 1 of 16)	1614	NM_023090	Epas1
chr6	109388608	109388736	0.157812	10	2.5735e-06	1	intron (NM_001106747, intron 1 of 22)	-intron (NM_001106747, intron 1 of 22)	502	NM_001106747	Nek9
chr6	10980246	10980419	0.21246	10	2.6429e-05	1	Intergenic	Intergenic	-32601	NM_001163562	LOC681766
chr6	111075019	111075133	0.150088	10	0.00016918	1	promoter-TSS (NM_001108044)	-promoter-TSS (NM_001108044)	-455	NM_001108044	Cipc
chr6	11180602	11180672	0.18406	10	0.00020651	1	exon (NM_138541, exon 3 of 9)	-exon (NM_138541, exon 3 of 9)	3973	NM_138541	Epcam
chr6	115025254	115025467	0.15689	10	0.0025106	1	intron (NM_012888, intron 1 of 10)	-intron (NM_012888, intron 1 of 10)	362	NM_012888	Tshr
chr6	123607737	123608048	0.239083	13	2.6837e-06	1	intron (NM_001108047, intron 2 of 6)	-intron (NM_001108047, intron 2 of 6)	154429	NM_001108047	Foxn3
chr6	124172577	124172744	0.202747	10	0.0012466	1	Intergenic	Intergenic	-1360	NM_022293	Kcnk13
chr6	131118096	131118234	0.290115	10	6.7693e-06	1	Intergenic	Intergenic	936555	NM_001012194	Vrk1
chr6	132613351	132613511	0.17097	10	0.0024149	1	Intergenic	Intergenic	66373	NM_001109672	Ccnk
chr6	132827558	132827782	0.162732	11	4.1699e-05	1	intron (NM_001025741, intron 1 of 4)	-intron (NM_001025741, intron 1 of 4)	2080	NM_001025741	Eml1
chr6	135078259	135078476	0.160796	13	4.4719e-06	1	Intergenic	Intergenic	-126037	NM_001191112	Ppp2r5c
chr6	135570768	135570957	0.157842	10	1.2544e-05	1	Intergenic	Intergenic	-8366	NM_001010965	Mok
chr6	136685256	136685849	0.185806	11	0.00018562	1	Intergenic	Intergenic	-9698	NM_001024749_1	RGD1305713
chr6	136909423	136909562	0.17766	12	8.0401e-06	1	promoter-TSS (NM_144750)	-promoter-TSS (NM_144750)	86	NM_144750	Aspg
chr6	137278386	137278623	0.1657	10	0.0020585	1	Intergenic	Intergenic	72054	NM_001126280	Tmem179
chr6	144416268	144416543	0.23229	12	0.00011229	1	intron (NM_031600, intron 12 of 22)	-intron (NM_031600, intron 12 of 22)	-104631	NR_031895	Mir153
chr6	22228399	22228653	0.158053	10	0.0020239	1	Intergenic	Intergenic	99105	NM_001025133	Capn13
chr6	24359364	24359565	0.259723	10	2.8145e-05	1	Intergenic	Intergenic	-64943	NM_138898	Plb1
chr6	35750234	35750373	0.150957	10	0.00015795	1	Intergenic	Intergenic	-80193	NM_001106718	Fam49a
chr6	48916918	48916998	0.212175	10	0.00027344	1	exon (NM_001025051, exon 1 of 2)	-exon (NM_001025051, exon 1 of 2)	656	NM_001025051	Fam110c
chr6	72121232	72121598	0.152025	10	0.0070908	1	Intergenic	Intergenic	37239	NM_001108981	Dtd2
chr6	73461476	73461713	0.175547	10	0.00016261	1	Intergenic	Intergenic	448236	NM_022618	Akap6
chr6	75043137	75043400	0.154321	10	0.003897	1	Intergenic	Intergenic	-30634	NM_001106729	Eapp
chr6	77102152	77102296	0.378044	10	1.4723e-05	1	Intergenic	Intergenic	-5544	NM_001039539	Pax9
chr6	77999933	78000122	0.166805	10	0.00012264	1	intron (NM_012742, intron 5 of 8)	-intron (NM_012742, intron 5 of 8)	9148	NM_012742	Foxa1
chr6	9225988	9226216	0.152556	14	0.00024024	1	Intergenic	Intergenic	-128129	NM_001191908	Six2
chr6	93009064	93009482	0.208864	10	0.00093511	1	intron (NM_001271054, intron 6 of 13)	-intron (NM_001271054, intron 6 of 13)	-45351	NM_001009602	Actr10
chr6	97772842	97773093	0.21503	11	1.0513e-05	1	promoter-TSS (NM_133610)	-promoter-TSS (NM_133610)	-886	NM_133610	Kcnh5
chr6	99479225	99479389	0.186144	11	0.0013619	1	intron (NM_172034, intron 6 of 11)	-intron (NM_172034, intron 6 of 11)	51340	NM_172034	Fntb
chr7	10022455	10022591	0.162221	10	0.00048343	1	promoter-TSS (NM_017245)	-promoter-TSS (NM_017245)	-192	NM_017245	Eef2
chr7	10053689	10054287	0.151275	10	0.0031401	1	intron (NM_054002, intron 1 of 2)	-intron (NM_054002, intron 1 of 2)	6468	NM_054002	Zbtb7a
chr7	10280775	10281040	0.161101	22	7.0483e-05	1	Intergenic	Intergenic	10194	NM_001008321	Gadd45b
chr7	10320596	10320743	0.170735	10	0.00044021	1	TTS (NM_001047100)	-TTS (NM_001047100)	711	NM_145781	Timm13
chr7	105490356	105490905	0.168827	10	0.00015948	1	Intergenic	Intergenic	246334	NM_001134957	Zfat
chr7	10606324	10606462	0.168354	16	0.036501	1	promoter-TSS (NM_001033870)	-promoter-TSS (NM_001033870)	-918	NM_023102	Csnk1g2
chr7	10873867	10873959	0.165603	10	9.7885e-05	1	promoter-TSS (NM_001108071)	-promoter-TSS (NM_001108071)	-673	NM_001108071	Adamtsl5
chr7	11053826	11054020	0.174655	13	0.00027385	1	Intergenic	Intergenic	-3103	NM_031147	Cirbp
chr7	11202500	11202764	0.179045	10	0.00012284	1	promoter-TSS (NM_001108067)	-promoter-TSS (NM_001108067)	85	NM_001108067	Hmha1
chr7	11204371	11204626	0.191496	10	1.8358e-06	1	intron (NM_207598, intron 45 of 46)	-intron (NM_207598, intron 45 of 46)	-1782	NM_001108067	Hmha1
chr7	113706699	113706819	0.164492	10	0.013266	1	Intergenic	Intergenic	41334	NM_001305237	Rhpn1
chr7	11582192	11582431	0.353044	10	2.5474e-06	1	TTS (NM_001191777)	-TTS (NM_001191777)	-1068	NM_001108065	Shc2
chr7	116883915	116884500	0.156044	10	0.026133	1	intron (NM_001135819, intron 1 of 1)	-intron (NM_001135819, intron 1 of 1)	3457	NM_001135819	Pdxp
chr7	117420735	117421183	0.174293	10	0.00045488	1	promoter-TSS (NM_031617)	-promoter-TSS (NM_031617)	-195	NM_031617	Csnk1e
chr7	118121893	118122120	0.178768	10	0.010657	1	intron (NM_001033703, intron 1 of 7)	-intron (NM_001033703, intron 1 of 7)	427	NM_001033703	Apobec3b
chr7	118156527	118157014	0.202892	10	0.00015068	1	intron (NM_199117, intron 2 of 5)	-intron (NM_199117, intron 2 of 5)	8950	NM_199117	Cbx7
chr7	118257043	118257266	0.162725	10	0.00095616	1	intron (NM_031524, intron 1 of 6)	-intron (NM_031524, intron 1 of 6)	4866	NM_031524	Pdgfb
chr7	120189128	120189571	0.185457	10	0.0069011	1	intron (NM_001098240_3, intron 4 of 9)	-intron (NM_001098240_3, intron 4 of 9)	20185	NM_001007146	Tob2
chr7	121033627	121033884	0.185153	10	0.0012057	1	Intergenic	Intergenic	-92710	NM_001130579	Serhl2
chr7	121039521	121039742	0.199203	10	3.7486e-06	1	Intergenic	Intergenic	-86834	NM_001130579	Serhl2
chr7	121555008	121555256	0.195266	12	6.1409e-06	1	Intergenic	Intergenic	-34313	NM_012515	Tspo
chr7	122569912	122570052	0.17684	10	8.681e-05	1	Intergenic	Intergenic	-123595	NM_001012121	Prr5
chr7	12738602	12738849	0.235538	10	6.573e-06	1	intron (NM_020087, intron 1 of 34)	-intron (NM_020087, intron 1 of 34)	1289	NM_020087	Notch3
chr7	129090873	129091156	0.172501	10	2.7833e-05	1	Intergenic	Intergenic	-28743	NM_001108750	Cpne8
chr7	13590298	13590419	0.217369	10	8.361e-06	1	intron (NM_019623, intron 11 of 11)	-intron (NM_019623, intron 11 of 11)	-7734	NM_001163062	Zfp870
chr7	136018806	136018952	0.160015	10	0.00049138	1	intron (NM_001039454, intron 2 of 3)	-intron (NM_001039454, intron 2 of 3)	15253	NM_001039454	Pced1b
chr7	137575677	137575761	0.192143	10	9.4678e-06	1	exon (NM_030993, exon 2 of 2)	-exon (NM_030993, exon 2 of 2)	811	NM_030993	Ddn
chr7	137864857	137865004	0.150916	10	0.015749	1	promoter-TSS (NM_001271242)	-promoter-TSS (NM_001271242)	-461	NM_001271242	C1ql4
chr7	138781733	138781909	0.153392	12	1.8245e-06	1	Intergenic	Intergenic	-189242	NM_001100895	Atf1
chr7	139042717	139042839	0.231378	10	0.00012644	1	Intergenic	Intergenic	-19442	NM_001037355_1	Mettl7a
chr7	139882749	139883165	0.19864	14	8.9007e-06	1	exon (NM_022441, exon 10 of 10)	-exon (NM_022441, exon 10 of 10)	9361	NM_022441	Acvrl1
chr7	140480248	140480436	0.185971	10	0.00036434	1	promoter-TSS (NM_001008809)	-promoter-TSS (NM_001008809)	66	NM_001008809	Krt72
chr7	141706412	141706517	0.213315	14	0.00016669	1	Intergenic	Intergenic	5907	NM_001106796	Hoxc12
chr7	141718853	141719071	0.157459	10	0.0074139	1	intron (NM_001308639, intron 1 of 1)	-intron (NM_001308639, intron 1 of 1)	1052	NM_001308639	Hoxc11
chr7	141739254	141739488	0.154046	12	6.4311e-05	1	Intergenic	Intergenic	2612	NR_031913	Mir196a
chr7	141822463	141822968	0.161157	13	0.00031517	1	Intergenic	Intergenic	25782	NM_001109884	Hoxc4
chr7	18655660	18655796	0.192854	10	8.3402e-05	1	Intergenic	Intergenic	40779	NM_001127573_1	LOC689226
chr7	20993578	20993698	0.183073	10	0.00069844	1	Intergenic	Intergenic	-28585	NM_175598	Ric8b
chr7	21142060	21142179	0.152006	10	0.0011823	1	Intergenic	Intergenic	129481	NM_001191878	Polr3b
chr7	22301929	22302169	0.158031	10	0.0092734	1	intron (NM_001108741, intron 4 of 20)	-intron (NM_001108741, intron 4 of 20)	22776	NM_001108741	Appl2
chr7	22335331	22335544	0.158386	12	0.00044632	1	Intergenic	Intergenic	56165	NM_001108741	Appl2
chr7	22728832	22729166	0.168537	10	6.9768e-05	1	intron (NM_001108079, intron 2 of 2)	-intron (NM_001108079, intron 2 of 2)	145767	NM_001108742	Slc41a2
chr7	22948785	22949210	0.178662	16	0.0025652	1	intron (NM_001108079, intron 1 of 2)	-intron (NM_001108079, intron 1 of 2)	1086	NM_001108079	Chst11
chr7	23286859	23287163	0.209894	11	2.3033e-05	1	Intergenic	Intergenic	33084	NM_053729	Tdg
chr7	38463989	38464375	0.173456	10	0.00042819	1	Intergenic	Intergenic	223303	NM_001024352	LOC500827
chr7	57435836	57436017	0.151065	10	0.0047738	1	Intergenic	Intergenic	-19639	NM_001017459	Mdm1
chr7	59211692	59212239	0.229346	10	0.0003295	1	intron (NM_032069, intron 7 of 20)	-intron (NM_032069, intron 7 of 20)	61850	NM_032069	Grip1
chr7	69715742	69715976	0.173079	23	0.0018942	1	Intergenic	Intergenic	60869	NM_001013174	Laptm4b
chr7	76652893	76653044	0.217	10	0.00011887	1	exon (NM_001130501, exon 8 of 8)	-exon (NM_001130501, exon 8 of 8)	-405695	NM_001197907	Oxr1
chr7	878163	878459	0.210825	10	3.2887e-05	1	Intergenic	Intergenic	259356	NM_173305	Hsd17b6
chr7	96088296	96088388	0.171048	10	6.4236e-05	1	Intergenic	Intergenic	-8555	NM_017136	Sqle
chr7	9962120	9962230	0.165068	10	0.00072262	1	Intergenic	Intergenic	-9388	NM_001040190	Atcay
chr8	111521993	111522530	0.167967	10	0.0034381	1	Intergenic	Intergenic	11904	NM_001100547	Dusp7
chr8	113612601	113612736	0.39	10	4.9962e-06	1	exon (NM_001033971, exon 2 of 5)	-exon (NM_001033971, exon 2 of 5)	787	NM_020080	Ndufaf3
chr8	114029415	114029674	0.212535	10	0.010273	1	intron (NM_019333, intron 8 of 14)	-intron (NM_019333, intron 8 of 14)	17002	NM_019333	Pfkfb4
chr8	115263240	115263263	0.226357	10	0.00078927	1	intron (NM_001109299, intron 2 of 5)	-intron (NM_001109299, intron 2 of 5)	5871	NM_001109299	Tmie
chr8	117805871	117806222	0.150452	11	0.00019834	1	Intergenic	Intergenic	544087	NM_001029910	Pdcd6ip
chr8	122812560	122812689	0.152276	10	0.0049577	1	Intergenic	Intergenic	-148677	NM_001025705	Azi2
chr8	123369898	123370225	0.15095	10	0.013239	1	Intergenic	Intergenic	-34478	NM_001191080	Golga4
chr8	124554592	124554781	0.181904	12	3.1473e-05	1	Intergenic	Intergenic	-9386	NM_001160162	Scn5a
chr8	126308152	126308199	0.214552	10	0.00061649	1	Intergenic	Intergenic	-63908	NM_001134565	Trak1
chr8	127285109	127285246	0.157031	14	9.2766e-06	1	Intergenic	Intergenic	-105100	NR_031885	Mir138-1
chr8	128489694	128489784	0.203514	13	0.0079839	1	intron (NM_001024266, intron 1 of 9)	-intron (NM_001024266, intron 1 of 9)	106	NM_001024266	Lztfl1
chr8	19713595	19713712	0.192775	10	0.0011856	1	intron (NM_001015017, intron 1 of 5)	-intron (NM_001015017, intron 1 of 5)	33320	NM_001015017	Olfm2
chr8	20890481	20891149	0.197555	10	1.8201e-06	1	intron (NM_001270413, intron 3 of 11)	-intron (NM_001270413, intron 3 of 11)	4176	NM_001270413	Kank2
chr8	22759998	22760321	0.20345	12	0.00014045	1	Intergenic	Intergenic	-223025	NM_001135799	Bmper
chr8	32314432	32314539	0.185318	10	1.3238e-05	1	Intergenic	Intergenic	-4704	NM_001017381	Fli1
chr8	32536549	32537256	0.17749	10	0.00035474	1	intron (NM_012555, intron 6 of 7)	-intron (NM_012555, intron 6 of 7)	55209	NM_012555	Ets1
chr8	34680267	34680487	0.183056	10	3.7901e-05	1	intron (NM_001048215, intron 1 of 15)	-intron (NM_001048215, intron 1 of 15)	214418	NM_203337	St3gal4
chr8	38791519	38791701	0.162212	10	0.00015746	1	intron (NM_024140, intron 3 of 3)	-intron (NM_024140, intron 3 of 3)	6372	NM_001106812	Vsig2
chr8	45167113	45167186	0.198173	10	5.3432e-06	1	Intergenic	Intergenic	-65307	NM_053519	Sorl1
chr8	4611806	4611963	0.165399	10	0.00021132	1	intron (NM_001014205, intron 1 of 3)	-intron (NM_001014205, intron 1 of 3)	7755	NM_001014205	Tmem123
chr8	46779468	46779845	0.174527	10	0.0010854	1	intron (NM_001100476, intron 1 of 5)	-intron (NM_001100476, intron 1 of 5)	40687	NM_001100476	Pvrl1
chr8	48521314	48521571	0.157151	10	0.010915	1	intron (NM_001108141, intron 3 of 32)	-intron (NM_001108141, intron 3 of 32)	115070	NM_001108141	Dscaml1
chr8	51993743	51994061	0.208929	11	1.5363e-05	1	intron (NM_001013181, intron 4 of 6)	-intron (NM_001013181, intron 4 of 6)	100911	NM_001013181	Zbtb16
chr8	57231038	57231220	0.183242	10	0.003212	1	intron (NM_001106822, intron 1 of 6)	-intron (NM_001106822, intron 1 of 6)	717	NM_001106822	Slc35f2
chr8	59085758	59085921	0.169146	10	3.6354e-05	1	Intergenic	Intergenic	-13827	NM_001009668	Etfa
chr8	59110663	59110793	0.153779	10	0.0032011	1	TTS (NM_020471)	-TTS (NM_020471)	5104	NM_020471	Isl2
chr8	62015159	62015583	0.17332	10	2.4291e-06	1	Intergenic	Intergenic	-37082	NM_001305238	Stoml1
chr8	68243860	68244077	0.155357	12	3.1382e-05	1	Intergenic	Intergenic	-31268	NM_001109002	Smad6
chr8	68596094	68596312	0.167184	10	3.7519e-06	1	Intergenic	Intergenic	-53164	NM_001008380	Dis3l
chr8	69055902	69056303	0.1977	10	0.00010424	1	Intergenic	Intergenic	-76589	NM_031152	Rab11a
chr8	69263779	69263927	0.164546	10	0.00012138	1	intron (NM_001106831, intron 1 of 5)	-intron (NM_001106831, intron 1 of 5)	755	NM_001106831	Hacd3
chr8	75692787	75692887	0.193326	10	2.3869e-05	1	intron (NM_053896, intron 1 of 13)	-intron (NM_053896, intron 1 of 13)	738	NM_053896	Aldh1a2
chr8	80042122	80042247	0.227594	10	0.0001253	1	Intergenic	Intergenic	-86602	NM_031770	Gnb5
chr8	81072346	81072568	0.201293	10	1.8579e-06	1	exon (NM_013074, exon 7 of 8)	-exon (NM_013074, exon 7 of 8)	-30930	NM_001191998	Gfral
chr8	96317295	96317435	0.151758	10	9.9901e-05	1	exon (NM_022677, exon 1 of 3)	-exon (NM_022677, exon 1 of 3)	765	NM_022677	Zic1
chr8	96337463	96337622	0.1561	14	0.00011545	1	exon (NM_001108176, exon 2 of 3)	-exon (NM_001108176, exon 2 of 3)	1569	NM_001108176	Zic4
chr8	97538520	97538806	0.231794	11	0.0013599	1	intron (NM_175869, intron 1 of 19)	-intron (NM_001142915, intron 1 of 18)	13384	NM_175869	Plod2
chr9	106838283	106838591	0.17327	10	0.004973	1	Intergenic	Intergenic	-16818	NM_001108237	Lama1
chr9	11003194	11003338	0.168237	10	9.8955e-05	1	intron (NM_031684, intron 1 of 16)	-intron (NM_031684, intron 1 of 16)	3212	NM_031684	Slc29a1
chr9	1289083	1289547	0.159174	10	1.7093e-05	1	Intergenic	Intergenic	-121072	NM_001013177	Sult1c2a
chr9	133901	134044	0.163022	12	0.00040977	1	exon (NM_053521, exon 1 of 9)	-exon (NM_053521, exon 1 of 9)	135	NM_053521	Slc5a7
chr9	17947083	17947400	0.157463	10	2.8109e-06	1	intron (NM_001106895, intron 2 of 6)	-intron (NM_001106895, intron 2 of 6)	10518	NM_001106895	Tfap2d
chr9	18085589	18085859	0.209544	10	4.4974e-06	1	Intergenic	Intergenic	33322	NM_001106896	Tfap2b
chr9	20767601	20767711	0.151418	17	4.2116e-05	1	exon (NM_001134643, exon 1 of 16)	-exon (NM_001134643, exon 1 of 16)	164	NM_001134643	Kcnq5
chr9	34946013	34946362	0.161432	10	0.013373	1	Intergenic	Intergenic	-32253	NM_001108210	Hs6st1
chr9	39492533	39492677	0.165956	10	0.028871	1	intron (NM_133575, intron 1 of 10)	-intron (NM_133575, intron 1 of 10)	418	NM_133575	Il1rl2
chr9	40324566	40324753	0.162174	10	0.013508	1	Intergenic	Intergenic	121906	NR_131082	LOC100910304
chr9	47194780	47194916	0.212134	10	9.6917e-05	1	promoter-TSS (NM_001014216)	-promoter-TSS (NM_001014216)	-43	NM_001014216	Nabp1
chr9	53026330	53026559	0.20247	10	0.0035426	1	Intergenic	Intergenic	-59477	NM_001191806	Ccdc150
chr9	53771543	53771784	0.160884	11	8.8502e-05	1	Intergenic	Intergenic	-41132	NM_001191807	Ankrd44
chr9	55831342	55831584	0.16883	10	0.016346	1	Intergenic	Intergenic	-6780	NM_001109306	Satb2
chr9	57849735	57849954	0.16304	10	0.00011334	1	Intergenic	Intergenic	-37193	NM_001013413	Als2
chr9	58087167	58087356	0.198881	10	0.00020217	1	Intergenic	Intergenic	23522	NM_001271185	LOC100360552
chr9	58092404	58092716	0.153572	10	0.02431	1	Intergenic	Intergenic	28820	NM_001271185	LOC100360552
chr9	5975125	5975319	0.182679	10	1.7016e-05	1	Intergenic	Intergenic	-33726	NM_001135011	Rftn1
chr9	61945668	61945752	0.174974	14	6.911e-05	1	Intergenic	Intergenic	-106842	NM_012961	Gpr1
chr9	62314470	62314608	0.239062	11	4.8654e-06	1	Intergenic	Intergenic	103673	NM_001108221	Mdh1b
chr9	6648986	6649141	0.159989	10	0.0002749	1	Intergenic	Intergenic	130866	NM_001106881	Mocs1
chr9	74116802	74116948	0.153616	18	4.1881e-06	1	exon (NM_001108226, exon 4 of 4)	-exon (NM_001108226, exon 4 of 4)	-7528	NM_001108227	Wnt10a
chr9	7755998	7756555	0.172574	10	0.0004479	1	Intergenic	Intergenic	-191223	NM_001106883	Apobec2
chr9	8297399	8297487	0.18604	10	8.6138e-06	1	Intergenic	Intergenic	14815	NM_001106886	RGD1565959
chr9	84280972	84281467	0.17197	10	0.00070409	1	promoter-TSS (NM_001012133)	-promoter-TSS (NM_001012133)	-165	NM_001012133	Sp140
chr9	86566305	86566451	0.172475	10	3.6294e-06	1	Intergenic	Intergenic	-10363	NM_019311	Inpp5d
chr9	8966491	8966721	0.198483	10	3.1369e-05	1	Intergenic	Intergenic	17414	NM_001108197	Taf8
chr9	91642425	91643025	0.165412	11	0.0024764	1	Intergenic	Intergenic	46890	NM_182671	Ndufa10l1
chr9	92277896	92278068	0.168068	10	2.9339e-05	1	exon (NM_001109009, exon 1 of 3)	-exon (NM_001109009, exon 1 of 3)	468	NM_001109009	Aqp12a
chr9	92576408	92576554	0.161987	10	0.0016133	1	intron (NM_001037209, intron 1 of 3)	-intron (NM_001037209, intron 1 of 3)	259	NM_001037209	Mterfd2
chr9	9448512	9448821	0.322328	10	7.3934e-05	1	Intergenic	Intergenic	99228	NM_001106888	Gltscr1l
chrX	122512994	122513182	0.229491	10	9.3705e-06	1	Intergenic	Intergenic	116854	NM_001109368	Pramel
chrX	159308402	159308672	0.16582	10	3.0648e-05	1	Intergenic	Intergenic	27543	NM_001107580	Trex2
chrX	22768674	22768799	0.188982	10	0.00022624	1	Intergenic	Intergenic	-9718	NM_001191586	Bcor
chrX	23207707	23207919	0.156361	10	7.4817e-05	1	Intergenic	Intergenic	429358	NM_001191586	Bcor
chrX	23402556	23402760	0.175925	10	9.6856e-05	1	Intergenic	Intergenic	624203	NM_001191586	Bcor
chrX	28062373	28062468	0.155347	13	0.011052	1	exon (NM_021837, exon 1 of 1)	-exon (NM_021837, exon 1 of 1)	881	NM_021837	Mycs
chrX	36243991	36244127	0.152186	12	2.9952e-05	1	promoter-TSS (NM_001101003)	-promoter-TSS (NM_001101003)	98	NM_001101003	Kcne5
chrX	93870939	93871081	0.16903	14	0.00076226	1	intron (NM_021867, intron 1 of 2)	-intron (NM_021867, intron 1 of 2)	526	NM_021867	Fgf16

## Sheet: Hypomethylation
chr	start	end	meth_diff	Cpg_number	pvalue	qvalue	Annotation	Detailed.Annotation	Distance.to.TSS	Nearest.PromoterID	Gene.Name
chr8	68480227	68480377	-0.296557	44	3.4578e-38	1.9537e-32	Intergenic	Intergenic	-6282	NM_001025287_1	Tipin
chr6	137872933	137873026	-0.388505	13	3.0484e-33	1.7223e-27	intron (NM_022588, intron 1 of 20)	-intron (NM_022588, intron 1 of 20)	-11045	NM_001170595	Gpr132
chr4	122994849	122994964	-0.176868	14	8.1735e-29	4.618e-23	promoter-TSS (NM_053534)	-promoter-TSS (NM_053534)	-415	NM_053534	Tpra1
chr16	20030280	20030475	-0.158295	34	3.9191e-27	2.2143e-21	exon (NM_001107307, exon 8 of 8)	-exon (NM_001107307, exon 8 of 8)	5389	NM_001107307	Cilp2
chr1	7882517	7882807	-0.212345	32	4.5206e-27	2.5541e-21	promoter-TSS (NM_012760)	-promoter-TSS (NM_012760)	-12	NM_012760	Plagl1
chr10	91065538	91065719	-0.391143	15	1.2321e-26	6.9613e-21	intron (NM_053668, intron 15 of 18)	-intron (NM_053668, intron 15 of 18)	20608	NM_053668	Mpp3
chr7	139830575	139830778	-0.173941	12	7.9865e-25	4.5124e-19	Intergenic	Intergenic	-42919	NM_022441	Acvrl1
chr14	80990378	80990667	-0.287349	18	6.1475e-24	3.4733e-18	Intergenic	Intergenic	8643	NM_001108363	Hmx1
chr4	57078865	57079026	-0.169571	15	8.2227e-24	4.6458e-18	Intergenic	Intergenic	-3743	NR_031901	Mir183
chr10	64457001	64457142	-0.200515	16	9.7164e-24	5.4897e-18	promoter-TSS (NM_001013858)	-promoter-TSS (NM_001013858)	-264	NM_001013858	Tlcd1
chr12	37118166	37118487	-0.419149	10	2.8446e-23	1.6072e-17	promoter-TSS (NM_001191548)	-promoter-TSS (NM_001191548)	376	NM_001044226	Rita1
chr4	122991894	122992027	-0.167016	17	1.5657e-22	8.8462e-17	promoter-TSS (NM_001107873)	-promoter-TSS (NM_001107873)	-27	NM_001107873	Mcm2
chr1	73581156	73581248	-0.165965	15	2.2945e-22	1.2964e-16	Intergenic	Intergenic	-11933	NM_001008944	Vom1r59
chr10	67014415	67014671	-0.168253	16	6.1734e-22	3.488e-16	Intergenic	Intergenic	-63935	NM_001037189	Nsrp1
chr4	120838151	120838254	-0.195118	12	9.4453e-22	5.3366e-16	promoter-TSS (NM_001108636)	-promoter-TSS (NM_001108636)	35	NM_001108636	Snrnp27
chrX	123250786	123250881	-0.189477	15	5.7077e-21	3.2249e-15	promoter-TSS (NM_001024267)	-promoter-TSS (NM_001024267)	-46	NM_001024267	MGC109340
chr7	139404866	139404894	-0.26316	10	1.2304e-20	6.9519e-15	intron (NM_199497, intron 2 of 23)	-intron (NM_001270794, intron 2 of 22)	-1063	NM_182817	Smagp
chr13	44450930	44451064	-0.157552	12	4.209e-20	2.3781e-14	intron (NM_001134958, intron 1 of 21)	-intron (NM_001134958, intron 1 of 21)	1449	NM_001134958	Srgap2
chr10	72082960	72083109	-0.255282	13	7.3645e-20	4.1609e-14	intron (NM_013103, intron 1 of 6)	-intron (NM_001308148, intron 1 of 6)	2065	NM_013103	Hnf1b
chr15	14313220	14313284	-0.295123	10	9.1337e-20	5.1605e-14	intron (NM_013219, intron 26 of 28)	-intron (NM_013219, intron 26 of 28)	-37544	NM_001107251	Fezf2
chr1	39972520	39972759	-0.179307	18	1.211e-19	6.8419e-14	Intergenic	Intergenic	427927	NM_183334	Ldhal6b
chr2	190334034	190334205	-0.158464	12	1.2189e-19	6.8866e-14	intron (NM_012780, intron 1 of 22)	-intron (NM_012780, intron 1 of 22)	142	NM_012780	Arnt
chr1	89163816	89163859	-0.162329	12	1.2498e-19	7.0615e-14	promoter-TSS (NM_001107506)	-promoter-TSS (NM_001107506)	-40	NM_001107506	Tshz3
chr9	46503707	46503770	-0.272256	10	3.6712e-19	2.0742e-13	Intergenic	Intergenic	-6179	NM_032612	Stat1
chr11	66196569	66196790	-0.17853	10	7.3939e-19	4.1775e-13	Intergenic	Intergenic	42199	NM_020081	Cd86
chr7	10016205	10016379	-0.163453	24	1.1102e-18	6.2724e-13	promoter-TSS (NM_022546)	-promoter-TSS (NM_022546)	73	NM_022546	Dapk3
chr1	210062397	210062620	-0.16718	10	1.2632e-18	7.1369e-13	promoter-TSS (NM_001134575)	-promoter-TSS (NM_001134575)	-733	NM_001134575	RGD1308106
chr1	13275134	13275253	-0.205724	14	1.3358e-18	7.5472e-13	intron (NM_001037789, intron 4 of 5)	-intron (NM_001037789, intron 4 of 5)	9006	NM_001037789	Ccdc28a
chr20	27499050	27499428	-0.332811	13	1.3574e-18	7.6691e-13	Intergenic	Intergenic	-16249	NM_053408	Chst3
chr1	85684731	85685352	-0.1617	37	1.7115e-18	9.6698e-13	Intergenic	Intergenic	-7847	NM_001145273	LOC688869
chr6	95012615	95012904	-0.191477	19	1.7799e-18	1.0057e-12	intron (NM_001013098, intron 2 of 5)	-intron (NM_001013098, intron 2 of 5)	16759	NM_001013098	Dhrs7
chr15	42809523	42809684	-0.17433	14	2.6595e-18	1.5026e-12	promoter-TSS (NM_001005761)	-promoter-TSS (NM_001005761)	74	NM_001005761	Mtmr9
chr7	10379918	10380068	-0.345218	14	2.8748e-18	1.6242e-12	intron (NM_001109609, intron 1 of 1)	-intron (NM_001109609, intron 1 of 1)	333	NM_001109609	Lingo3
chr3	101908860	101909040	-0.186486	10	3.0234e-18	1.7082e-12	Intergenic	Intergenic	208265	NM_001107758	Meis2
chr17	92792781	92792959	-0.187141	15	3.7142e-18	2.0985e-12	Intergenic	Intergenic	8654	NM_001107368	Bmi1
chr1	168380893	168380970	-0.155777	13	7.0276e-18	3.9706e-12	exon (NM_012715, exon 2 of 4)	-exon (NM_012715, exon 2 of 4)	677	NM_012715	Adm
chr13	81571833	81571949	-0.28138	10	7.0462e-18	3.9811e-12	intron (NM_170789, intron 1 of 7)	-intron (NM_001205304, intron 1 of 6)	56508	NM_001205304	Cd247
chr20	29548097	29548184	-0.21553	13	7.6147e-18	4.3023e-12	intron (NM_001106394, intron 1 of 2)	-intron (NM_001106394, intron 1 of 2)	1159	NM_001106394	Nodal
chr2	22703885	22704016	-0.262799	22	8.2713e-18	4.6733e-12	intron (NM_001134748, intron 3 of 5)	-intron (NM_001134748, intron 3 of 5)	18635	NM_001134748	Fam151b
chr3	136726532	136726712	-0.211994	17	9.3561e-18	5.2862e-12	Intergenic	Intergenic	16582	NM_012743	Foxa2
chr20	47315093	47315176	-0.24117	11	1.0443e-17	5.9e-12	intron (NM_001014249, intron 2 of 3)	-intron (NM_001014249, intron 2 of 3)	186785	NM_001014249	Pdss2
chr20	7159664	7159801	-0.15015	10	1.1697e-17	6.609e-12	exon (NM_001191841, exon 2 of 10)	-exon (NM_001191841, exon 2 of 10)	20349	NM_001191841	Pnpla1
chr8	83507796	83508004	-0.228286	14	1.6492e-17	9.3179e-12	Intergenic	Intergenic	-41087	NM_175838	Eef1a1
chr6	133178105	133178237	-0.198771	10	1.8607e-17	1.0513e-11	promoter-TSS (NM_001010958)	-promoter-TSS (NM_001010958)	-571	NM_001010958	Slc25a29
chrX	159005046	159005123	-0.15185	10	2.1599e-17	1.2203e-11	Intergenic	Intergenic	27319	NM_001107579	Pnma5
chr18	60546033	60546155	-0.295583	11	2.1663e-17	1.224e-11	Intergenic	Intergenic	-3279	NM_001106141	RGD1562699
chr7	117193071	117193281	-0.193568	17	3.6871e-17	2.0832e-11	Intergenic	Intergenic	-20123	NM_053460	Pick1
chr5	123707503	123707639	-0.184248	14	4.8465e-17	2.7383e-11	Intergenic	Intergenic	-205588	NM_001135030	Tctex1d1
chr17	33017057	33017167	-0.220094	11	4.8915e-17	2.7637e-11	promoter-TSS (NM_001012052)	-promoter-TSS (NM_001012052)	6	NM_001012052	Cage1
chrX	121209862	121209969	-0.170553	10	5.0071e-17	2.829e-11	promoter-TSS (NM_001169129)	-promoter-TSS (NM_001169129)	-817	NM_001169129	Pcdh19
chr10	15470470	15470619	-0.233966	14	7.2336e-17	4.0869e-11	exon (NM_019338, exon 4 of 16)	-exon (NM_019338, exon 4 of 16)	633	NM_019338	Rgs11
chr11	32718336	32718540	-0.219519	20	2.175e-16	1.2288e-10	exon (NM_017325, exon 2 of 6)	-exon (NM_017325, exon 2 of 6)	6966	NM_017325	Runx1
chr7	1443286	1443814	-0.270082	19	2.2706e-16	1.2829e-10	intron (NM_001025403, intron 2 of 11)	-intron (NM_001025403, intron 2 of 11)	18968	NM_001025403	Rbms2
chr10	87841196	87841448	-0.347569	12	3.8468e-16	2.1734e-10	Intergenic	Intergenic	18893	NM_001004274	Igfbp4
chr18	49143550	49143655	-0.255477	12	4.1407e-16	2.3395e-10	Intergenic	Intergenic	111419	NM_001191697	Cep120
chr18	57308967	57309236	-0.322097	10	4.7345e-16	2.675e-10	intron (NM_176075, intron 1 of 11)	-intron (NM_176075, intron 1 of 11)	68767	NR_032139	Mir378
chr13	68904353	68904439	-0.54693	10	4.8263e-16	2.7269e-10	Intergenic	Intergenic	4293	NM_198790	Rgsl2h
chr10	57355494	57355639	-0.223798	10	4.9583e-16	2.8015e-10	exon (NM_001107015, exon 4 of 5)	-exon (NM_001107015, exon 4 of 5)	3755	NM_001191823	Vmo1
chr1	201635157	201635371	-0.171308	15	5.2401e-16	2.9606e-10	promoter-TSS (NM_001030021)	-promoter-TSS (NM_001030021)	-317	NM_001030021	Rplp2
chr1	164435505	164435711	-0.23542	15	5.9694e-16	3.3727e-10	Intergenic	Intergenic	-23561	NM_001000207	Olr233
chr9	90640863	90640979	-0.176655	10	7.5674e-16	4.2756e-10	intron (NM_001013179, intron 2 of 2)	-intron (NM_001013179, intron 2 of 2)	675	NM_001013179	Hes6
chr2	102698603	102698807	-0.197134	16	7.8181e-16	4.4172e-10	promoter-TSS (NR_031867)	-promoter-TSS (NR_031867)	-761	NR_031867	Mir124-2
chr8	82498461	82498567	-0.188602	10	8.4803e-16	4.7913e-10	promoter-TSS (NM_001014268)	-promoter-TSS (NM_001014268)	-473	NM_001014268	Lrrc1
chr9	71389795	71389922	-0.186462	17	2.0267e-15	1.1451e-09	Intergenic	Intergenic	-31874	NM_001192002	Mreg
chr10	57068155	57068277	-0.180753	10	2.4121e-15	1.3628e-09	promoter-TSS (NM_001108279)	-promoter-TSS (NM_001108279)	90	NM_001108279	Bcl6b
chr1	260072673	260072776	-0.177248	10	3.4259e-15	1.9356e-09	intron (NM_001107611, intron 1 of 13)	-intron (NM_001107611, intron 1 of 13)	-110923	NM_022265	Pdcd4
chr1	29966126	29966335	-0.339874	14	3.5904e-15	2.0286e-09	intron (NM_012654, intron 1 of 16)	-intron (NM_012654, intron 1 of 16)	7455	NM_012654	Slc9a3
chr19	15745161	15745240	-0.185312	10	4.8974e-15	2.767e-09	Intergenic	Intergenic	5213	NM_001030044	Irx5
chr17	47301994	47302084	-0.157689	10	5.1753e-15	2.924e-09	promoter-TSS (NM_001034947)	-promoter-TSS (NM_001034947)	74	NM_001106111	Acot13
chr14	79379136	79379246	-0.187696	10	5.8154e-15	3.2857e-09	Intergenic	Intergenic	-8056	NM_031823	Wfs1
chr3	135841226	135841366	-0.191753	10	6.1473e-15	3.4732e-09	Intergenic	Intergenic	-1333	NM_001191904	Nkx2-2
chr10	13539664	13539833	-0.17537	10	6.1913e-15	3.4981e-09	intron (NM_001031637, intron 21 of 29)	-intron (NM_001031637, intron 21 of 29)	-38770	NM_001100474	Ccnf
chr2	33895507	33895602	-0.173822	10	6.2343e-15	3.5224e-09	Intergenic	Intergenic	286521	NM_001106405	Cd180
chr2	5806414	5806511	-0.158198	13	7.6427e-15	4.3181e-09	Intergenic	Intergenic	-12359	NM_031130	Nr2f1
chr4	117745696	117745891	-0.174849	10	7.7118e-15	4.3572e-09	intron (NM_012893, intron 2 of 7)	-intron (NM_012893, intron 2 of 7)	1212	NM_012893	Actg2
chr1	212007910	212008055	-0.167163	10	8.0284e-15	4.536e-09	Intergenic	Intergenic	11497	NM_177482	Scgb1d2
chr16	81908051	81908155	-0.22367	15	8.1194e-15	4.5874e-09	Intergenic	Intergenic	199062	NM_001107323	Tubgcp3
chr7	127673947	127674185	-0.196946	17	9.5271e-15	5.3828e-09	intron (NM_001191992, intron 2 of 4)	-intron (NM_001191992, intron 2 of 4)	541	NM_001191992	Odf3b
chr12	16823950	16824218	-0.310331	13	1.2067e-14	6.8179e-09	intron (NM_001105915, intron 2 of 6)	-intron (NM_001105915, intron 2 of 6)	1052	NM_001105915	Asmtl
chr9	4874453	4874590	-0.150687	17	1.3443e-14	7.595e-09	promoter-TSS (NM_001106880)	-promoter-TSS (NM_001106880)	-691	NM_001106880	Plcl2
chrX	38542995	38543111	-0.171936	12	2.3962e-14	1.3539e-08	exon (NM_001108252, exon 2 of 2)	-exon (NM_001108252, exon 2 of 2)	1246	NM_001108252	Usp51
chr2	140449429	140449684	-0.315974	11	2.5742e-14	1.4544e-08	intron (NM_001109558, intron 1 of 7)	-intron (NM_001109558, intron 1 of 7)	7022	NM_001109558	Setd7
chr10	16597664	16597775	-0.315552	10	2.8623e-14	1.6172e-08	Intergenic	Intergenic	-8463	NM_053651	Nkx2-5
chr2	116462831	116462941	-0.258626	10	3.3779e-14	1.9085e-08	intron (NM_001134615, intron 1 of 5)	-intron (NM_001134615, intron 1 of 5)	773	NM_001134615	Slc7a14
chr16	86189028	86189334	-0.185492	12	3.7525e-14	2.1202e-08	intron (NM_001107328, intron 1 of 4)	-intron (NM_001107328, intron 1 of 4)	1542	NM_001107328	Efnb2
chr13	95529023	95529239	-0.200474	10	3.9206e-14	2.2151e-08	Intergenic	Intergenic	-41928	NM_001271270	Ahctf1
chr1	125211458	125211681	-0.245345	14	4.2669e-14	2.4108e-08	Intergenic	Intergenic	75359	NM_080778	Nr2f2
chr7	123338616	123338705	-0.193424	10	4.7252e-14	2.6697e-08	promoter-TSS (NM_133313)	-promoter-TSS (NM_133313)	36	NM_133313	Atxn10
chr5	5291838	5291926	-0.366144	12	5.8913e-14	3.3286e-08	Intergenic	Intergenic	93991	NM_031822	Ncoa2
chr5	149208497	149209079	-0.255133	14	6.0971e-14	3.4449e-08	Intergenic	Intergenic	-1135	NM_053582	Tinagl1
chr5	162463653	162463755	-0.238246	10	7.0362e-14	3.9754e-08	Intergenic	Intergenic	135990	NM_001024986	RGD1306186
chr1	226422837	226422916	-0.253218	10	7.4855e-14	4.2293e-08	intron (NM_057211, intron 1 of 2)	-intron (NM_057211, intron 1 of 2)	1928	NM_057211	Klf9
chr2	234131032	234131090	-0.179821	10	8.2503e-14	4.6614e-08	intron (NM_017041, intron 1 of 13)	-intron (NM_017041, intron 1 of 13)	885	NM_017041	Ppp3ca
chr1	77425818	77425931	-0.204738	22	8.3511e-14	4.7183e-08	Intergenic	Intergenic	-15138	NM_012525	Cgm4
chr13	47030334	47030446	-0.159992	11	1.0071e-13	5.6902e-08	intron (NM_017259, intron 1 of 2)	-intron (NM_017259, intron 1 of 2)	355	NM_017259	Btg2
chr5	168245308	168245393	-0.494742	11	1.1204e-13	6.33e-08	intron (NM_001195559, intron 12 of 24)	-intron (NM_001195559, intron 12 of 24)	-44186	NM_057097	Vamp3
chr18	79445676	79445921	-0.187731	10	1.2017e-13	6.7898e-08	exon (NM_001191695, exon 1 of 5)	-exon (NM_001191695, exon 1 of 5)	193	NM_001191695	Zfp516
chr5	14739066	14739228	-0.150683	14	1.2036e-13	6.8001e-08	intron (NM_001127495, intron 1 of 4)	-intron (NM_001127495, intron 1 of 4)	1470	NM_001127495	Rgs20
chr11	31203582	31203716	-0.378572	10	1.2775e-13	7.2181e-08	Intergenic	Intergenic	-1767	NM_001100557	Olig2
chr5	154856717	154856873	-0.451107	10	1.489e-13	8.4127e-08	Intergenic	Intergenic	-26612	NM_001025739	Rpl11
chr4	30820511	30820971	-0.171358	18	1.5918e-13	8.9935e-08	Intergenic	Intergenic	324331	NM_019234	Dync1i1
chr3	15208569	15208828	-0.150579	10	1.7037e-13	9.6259e-08	intron (NM_001107837, intron 5 of 10)	-intron (NM_001107837, intron 5 of 10)	7377	NM_001107837	Lhx6
chr12	44505734	44506065	-0.248088	20	1.7084e-13	9.6525e-08	Intergenic	Intergenic	176088	NM_001105937	Sgsm1
chr12	15570366	15570704	-0.163966	18	1.8835e-13	1.0642e-07	Intergenic	Intergenic	10527	NM_017179	Uncx
chr4	163550379	163550479	-0.234096	10	2.0661e-13	1.1673e-07	Intergenic	Intergenic	-3928	NM_022267	Ccnd2
chr12	40579836	40580008	-0.164968	10	2.9706e-13	1.6784e-07	intron (NM_001024254, intron 2 of 19)	-intron (NM_001024254, intron 2 of 19)	71671	NM_001024254	Taok3
chr17	4286792	4287047	-0.219353	28	3.0346e-13	1.7146e-07	Intergenic	Intergenic	-256570	NM_031007	Adcy2
chr5	108929059	108929165	-0.19314	10	3.2824e-13	1.8546e-07	Intergenic	Intergenic	-12732	NM_031550	Cdkn2a
chr5	79588141	79588206	-0.271463	10	3.3298e-13	1.8813e-07	Intergenic	Intergenic	-36214	NM_019340	Rgs3
chr15	49982091	49982196	-0.160003	12	3.3824e-13	1.9111e-07	promoter-TSS (NM_001106047)	-promoter-TSS (NM_001106047)	41	NM_001106047	Loxl2
chr7	10416146	10416439	-0.288172	15	4.4669e-13	2.5238e-07	exon (NM_001109591, exon 7 of 7)	-exon (NM_001109591, exon 7 of 7)	3380	NM_012902	Amh
chr5	5291635	5291794	-0.16134	13	4.9949e-13	2.8221e-07	Intergenic	Intergenic	93824	NM_031822	Ncoa2
chr14	27035426	27035521	-0.160523	13	5.1419e-13	2.9051e-07	Intergenic	Intergenic	415535	NM_001108860	Tecrl
chr12	45185820	45186063	-0.372674	10	5.1426e-13	2.9056e-07	Intergenic	Intergenic	169173	NM_001191928	Mn1
chr8	115013016	115013184	-0.229352	15	5.8581e-13	3.3098e-07	Intergenic	Intergenic	-7808	NM_139259	Nradd
chr7	72070602	72070785	-0.280227	10	7.4511e-13	4.2099e-07	Intergenic	Intergenic	57739	NM_134353	Pabpc1
chr20	10060325	10060769	-0.159038	28	8.2444e-13	4.6581e-07	intron (NM_012522, intron 5 of 15)	-intron (NM_012522, intron 5 of 15)	14973	NM_012522	Cbs
chr19	11263007	11263267	-0.155369	14	9.4084e-13	5.3157e-07	promoter-TSS (NM_138826)	-promoter-TSS (NM_138826)	-490	NM_138826	Mt1a
chr6	32531923	32532153	-0.352987	11	1.0281e-12	5.8089e-07	Intergenic	Intergenic	-8197	NM_001099340_1	Wdr35l
chr8	52641114	52641213	-0.171657	12	1.1509e-12	6.5026e-07	promoter-TSS (NM_012547)	-promoter-TSS (NM_012547)	4	NM_012547	Drd2
chr8	20929875	20929942	-0.258822	10	1.2188e-12	6.8863e-07	intron (NM_001108997, intron 32 of 47)	-intron (NM_001108997, intron 32 of 47)	-18152	NM_001271710	LOC100361444
chr1	260002357	260002529	-0.427394	10	1.2989e-12	7.339e-07	intron (NM_001107611, intron 1 of 13)	-intron (NM_001107611, intron 1 of 13)	96898	NM_001107611	Rbm20
chr19	54362782	54362897	-0.242423	10	1.3266e-12	7.4951e-07	Intergenic	Intergenic	35962	NR_037621	Cox6c-ps1
chr12	25401956	25402163	-0.191008	10	1.385e-12	7.8252e-07	Intergenic	Intergenic	-532636	NR_106694	Mir6322
chr10	68525047	68525118	-0.184085	12	1.4935e-12	8.4382e-07	promoter-TSS (NM_001105819)	-promoter-TSS (NM_001105819)	-89	NM_001105819	Rhbdl3
chr4	29879698	29879866	-0.178219	10	1.5864e-12	8.9629e-07	intron (NM_053473, intron 9 of 17)	-intron (NM_053473, intron 9 of 17)	85039	NM_032077	Pon1
chr18	30562398	30562511	-0.254628	10	1.6727e-12	9.4505e-07	exon (NM_001108428, exon 1 of 2)	-exon (NM_001108428, exon 1 of 2)	186	NM_001108428	RGD1563159
chr3	156165054	156165277	-0.188467	10	1.7017e-12	9.6147e-07	intron (NM_019161, intron 8 of 9)	-intron (NM_019161, intron 8 of 9)	72564	NM_134360	Cd40
chr11	59432317	59432393	-0.203401	10	1.7232e-12	9.7358e-07	Intergenic	Intergenic	-33142	NM_001105880	Zbtb20
chr12	14380001	14380302	-0.15473	13	1.9512e-12	1.1024e-06	exon (NM_001047092, exon 1 of 6)	-exon (NM_001047092, exon 1 of 6)	170	NM_001047092	Amz1
chr17	19906837	19907004	-0.172207	10	2.1033e-12	1.1883e-06	Intergenic	Intergenic	20228	NM_001170429	Nxnl2
chr7	140582241	140582523	-0.180492	10	2.1582e-12	1.2194e-06	exon (NM_001008805, exon 9 of 9)	-exon (NM_001008805, exon 9 of 9)	7798	NM_001008805	Krt76
chr6	138061034	138061574	-0.256169	10	2.1715e-12	1.2269e-06	intron (NM_022588, intron 2 of 20)	-intron (NM_022588, intron 2 of 20)	-53663	NM_001106761	Brf1
chr3	158697217	158697540	-0.152063	28	2.2334e-12	1.2618e-06	Intergenic	Intergenic	20399	NM_053805	Snai1
chr4	66889392	66889574	-0.218696	10	2.3875e-12	1.3489e-06	promoter-TSS (NM_001024326)	-promoter-TSS (NM_001024326)	37	NM_001024326	Rab19
chr11	81895770	81895920	-0.398838	10	2.7356e-12	1.5456e-06	Intergenic	Intergenic	150487	NM_001105868	Ephb3
chr1	125211188	125211366	-0.170641	10	3.0916e-12	1.7467e-06	Intergenic	Intergenic	75652	NM_080778	Nr2f2
chr3	10597293	10597741	-0.16802	19	3.5045e-12	1.98e-06	intron (NM_013157, intron 7 of 13)	-intron (NM_013157, intron 7 of 13)	16736	NM_013157	Ass1
chr5	3702916	3703122	-0.193249	10	4.3797e-12	2.4745e-06	promoter-TSS (NM_001191754)	-promoter-TSS (NM_001191754)	-196	NM_001191754	Msc
chr15	107598242	107598388	-0.161913	14	4.5071e-12	2.5465e-06	exon (NM_001108391, exon 1 of 3)	-exon (NM_001108391, exon 1 of 3)	612	NM_001108391	Zic5
chrX	23090707	23090830	-0.436809	10	4.7219e-12	2.6678e-06	Intergenic	Intergenic	312314	NM_001191586	Bcor
chr11	66123708	66123967	-0.246932	10	4.9377e-12	2.7898e-06	intron (NM_016996, intron 1 of 6)	-intron (NM_001309638, intron 1 of 6)	6936	NM_001309638	Casr
chr1	208205034	208205196	-0.191873	15	5.0506e-12	2.8536e-06	promoter-TSS (NM_001107572)	-promoter-TSS (NM_001107572)	-662	NM_001107572	Ovol1
chr14	43516534	43516644	-0.194126	10	5.2446e-12	2.9632e-06	exon (NM_001034198, exon 2 of 9)	-exon (NM_001034198, exon 2 of 9)	357	NM_001034198	Tmem33
chr17	14537432	14537598	-0.423151	11	5.5245e-12	3.1213e-06	Intergenic	Intergenic	80208	NM_017182	H2afy
chr3	164236195	164236321	-0.158162	12	5.5687e-12	3.1463e-06	Intergenic	Intergenic	-131346	NM_001107807	Pmepa1
chr7	947440	947536	-0.272062	10	5.9532e-12	3.3635e-06	Intergenic	Intergenic	190179	NM_173305	Hsd17b6
chr14	99689289	99689457	-0.16312	12	6.1699e-12	3.486e-06	Intergenic	Intergenic	142900	NM_001134702	Meis1
chr19	19899168	19899476	-0.281314	18	6.3286e-12	3.5756e-06	Intergenic	Intergenic	-66221	NM_001271381	Nkd1
chr10	48751248	48751526	-0.256336	14	6.723e-12	3.7985e-06	Intergenic	Intergenic	12885	NM_138895	Ubb
chrX	157604981	157605126	-0.212791	13	6.7927e-12	3.8378e-06	Intergenic	Intergenic	-29273	NM_012928	Cnga2
chr5	171557001	171557172	-0.341671	10	7.7088e-12	4.3555e-06	Intergenic	Intergenic	-81922	NM_001013937	Actrt2
chr10	20576235	20576359	-0.380824	10	7.9689e-12	4.5024e-06	exon (NM_031321, exon 37 of 37)	-exon (NM_031321, exon 37 of 37)	88865	NR_031930	Mir218-2
chr7	114065950	114066034	-0.180197	13	9.5405e-12	5.3904e-06	Intergenic	Intergenic	-24007	NM_001130565	Fam83h
chr3	77876590	77876758	-0.283024	10	1.0091e-11	5.7015e-06	promoter-TSS (NM_031797)	-promoter-TSS (NM_031797)	-910	NM_031797	Cd82
chr8	101982684	101982775	-0.181279	10	1.0239e-11	5.7849e-06	intron (NM_001007710, intron 1 of 5)	-intron (NM_001007710, intron 1 of 5)	428	NM_001007710	Pxylp1
chr18	49142848	49142955	-0.203368	13	1.0333e-11	5.8383e-06	Intergenic	Intergenic	112120	NM_001191697	Cep120
chr11	34337676	34338166	-0.269411	20	1.3132e-11	7.4194e-06	intron (NM_001107108, intron 1 of 10)	-intron (NM_001107108, intron 1 of 10)	1707	NM_001107108	Sim2
chr1	85280114	85280272	-0.338657	10	1.3208e-11	7.4624e-06	intron (NM_001098240, intron 4 of 9)	-intron (NM_001098240, intron 4 of 9)	-11451	NM_001177687	RGD1562079
chr17	7219430	7219503	-0.15313	10	1.3668e-11	7.7222e-06	intron (NM_012557, intron 1 of 14)	-intron (NM_012557, intron 1 of 14)	382	NM_012557	Fancc
chr20	18353190	18353300	-0.235073	10	1.3839e-11	7.8189e-06	intron (NM_001108531, intron 2 of 19)	-intron (NM_001108531, intron 2 of 19)	65166	NM_001108531	Bicc1
chr8	20470856	20471010	-0.162495	14	1.3988e-11	7.9033e-06	Intergenic	Intergenic	-10813	NM_053412	Ilf3
chr14	5254256	5254363	-0.222585	11	1.3991e-11	7.9051e-06	Intergenic	Intergenic	-134272	NM_001008338	Lrrc8d
chr6	128529961	128530126	-0.2268	17	1.6605e-11	9.3819e-06	Intergenic	Intergenic	-1360	NM_001191873	Gsc
chr9	35716782	35716893	-0.184178	10	1.7839e-11	1.0079e-05	Intergenic	Intergenic	23749	NM_001012002	Zap70
chr16	17846124	17846257	-0.197282	10	1.8127e-11	1.0242e-05	promoter-TSS (NM_001029921)	-promoter-TSS (NM_001029921)	-266	NM_001029921	Eps15l1
chr14	48466753	48467093	-0.176452	10	2.0929e-11	1.1825e-05	Intergenic	Intergenic	-77652	NM_001271306	Wdr82
chr15	10636114	10636526	-0.248034	17	2.1455e-11	1.2122e-05	Intergenic	Intergenic	114244	NM_001014136	Ngly1
chr6	124499537	124499761	-0.388842	11	2.1502e-11	1.2149e-05	Intergenic	Intergenic	22048	NM_031969	Calm1
chr19	53192410	53192553	-0.166149	13	2.2371e-11	1.264e-05	exon (NM_207613, exon 10 of 13)	-exon (NM_207613, exon 10 of 13)	9948	NM_207613	Cdh15
chr17	14839587	14839706	-0.37139	12	2.6076e-11	1.4733e-05	exon (NM_053624, exon 3 of 3)	-exon (NM_053624, exon 3 of 3)	5503	NM_053624	Pitx1
chr7	127773240	127773357	-0.189824	10	2.636e-11	1.4893e-05	Intergenic	Intergenic	19435	NM_001034933	Arsa
chr16	72449120	72449187	-0.357789	10	2.8447e-11	1.6072e-05	intron (NM_001134747, intron 5 of 5)	-intron (NM_001134747, intron 5 of 5)	359570	NM_001134747	Zmat4
chrX	127812367	127812555	-0.187317	21	2.8505e-11	1.6106e-05	promoter-TSS (NM_001024890)	-promoter-TSS (NM_001024890)	-723	NM_001024890	Pih1d3
chr10	85129850	85130113	-0.166004	10	2.8587e-11	1.6152e-05	Intergenic	Intergenic	53454	NM_001107042	Hoxb3
chr7	70766588	70766810	-0.183885	12	3.0137e-11	1.7027e-05	Intergenic	Intergenic	-2424	NM_001012118	Osr2
chr7	136996572	136996758	-0.236863	10	3.0975e-11	1.7501e-05	promoter-TSS (NM_001024356)	-promoter-TSS (NM_001024356)	96	NM_001024356	H1fnt
chr6	26860498	26861303	-0.326647	13	3.2291e-11	1.8244e-05	intron (NM_001003957, intron 1 of 17)	-intron (NM_001003957, intron 1 of 17)	1026	NM_001003957	Dnmt3a
chr10	55798681	55798783	-0.167906	12	3.7323e-11	2.1087e-05	promoter-TSS (NM_053749)	-promoter-TSS (NM_053749)	22	NM_053749	Aurkb
chr17	92212671	92212799	-0.204876	14	3.8281e-11	2.1629e-05	Intergenic	Intergenic	-33731	NM_001012162	Mllt10
chr10	92947187	92947328	-0.16792	10	3.869e-11	2.186e-05	intron (NM_001105715, intron 1 of 4)	-intron (NM_001105715, intron 1 of 4)	21653	NM_001105715	Wnt3
chr3	115688655	115688837	-0.309924	10	3.9554e-11	2.2348e-05	promoter-TSS (NM_171988)	-promoter-TSS (NM_171988)	-917	NM_171988	Bcl2l11
chr17	22001701	22002172	-0.233694	19	4.5461e-11	2.5686e-05	Intergenic	Intergenic	-4697	NM_001108880	Barx1
chr2	61677920	61678115	-0.257712	10	4.8778e-11	2.7559e-05	intron (NM_001012077, intron 1 of 14)	-intron (NM_001012077, intron 1 of 14)	12959	NM_001012077	Mtmr12
chr1	180111277	180111531	-0.290991	10	5.4314e-11	3.0687e-05	Intergenic	Intergenic	-91387	NM_181370	Hs3st2
chr1	227522059	227522403	-0.251539	10	5.7522e-11	3.25e-05	intron (NM_053773, intron 1 of 30)	-intron (NM_053773, intron 1 of 30)	52226	NM_053773	Tjp2
chr1	167034374	167034563	-0.197021	15	5.8271e-11	3.2923e-05	Intergenic	Intergenic	67869	NM_001191839	Trim66
chr16	5895695	5895826	-0.249534	10	6.5242e-11	3.6862e-05	Intergenic	Intergenic	-12998	NM_022592	Tkt
chr18	58175693	58176026	-0.158964	10	6.6056e-11	3.7321e-05	exon (NM_012492, exon 1 of 1)	-exon (NM_012492, exon 1 of 1)	1140	NM_012492	Adrb2
chr5	156168554	156168735	-0.183147	10	6.945e-11	3.9239e-05	Intergenic	Intergenic	18246	NM_001106692	Cela3b
chr5	151878988	151879112	-0.173556	10	7.5105e-11	4.2434e-05	exon (NM_001107909, exon 13 of 29)	-exon (NM_001107909, exon 13 of 29)	6433	NM_001107909	Map3k6
chr8	95155953	95156042	-0.299123	13	7.8822e-11	4.4534e-05	intron (NM_001108175, intron 3 of 13)	-intron (NM_001108175, intron 3 of 13)	22778	NM_001108175	Tbc1d2b
chr12	44316308	44316464	-0.412581	10	8.4291e-11	4.7624e-05	Intergenic	Intergenic	-13426	NM_001105937	Sgsm1
chr12	38169657	38169953	-0.312768	10	9.1767e-11	5.1848e-05	Intergenic	Intergenic	-3135	NM_181638	Tbx3
chr2	77270964	77271041	-0.252576	10	9.9935e-11	5.6463e-05	intron (NM_001107657, intron 2 of 39)	-intron (NM_001107657, intron 2 of 39)	87975	NM_001107657	Myo10
chr7	3422989	3423129	-0.281776	11	1.0369e-10	5.8587e-05	Intergenic	Intergenic	-34077	NM_001000057	Olr901
chr2	174851471	174851558	-0.221436	10	1.1441e-10	6.4639e-05	Intergenic	Intergenic	71100	NM_021757	Plrg1
chr6	126555850	126556018	-0.204233	10	1.1446e-10	6.4669e-05	intron (NM_001108052, intron 1 of 8)	-intron (NM_001108052, intron 1 of 8)	547	NM_001108052	Rin3
chr12	44350468	44350631	-0.261364	16	1.1631e-10	6.5712e-05	exon (NM_001105937, exon 4 of 25)	-exon (NM_001105937, exon 4 of 25)	20738	NM_001105937	Sgsm1
chr5	64716362	64716745	-0.163973	25	1.2189e-10	6.8869e-05	intron (NM_031628, intron 1 of 7)	-intron (NM_031628, intron 1 of 7)	3086	NM_031628	Nr4a3
chr10	86816557	86816900	-0.289916	11	1.2332e-10	6.9677e-05	promoter-TSS (NM_001108834)	-promoter-TSS (NM_001108834)	-347	NM_001108834	Stac2
chr20	4279281	4279439	-0.180775	10	1.4455e-10	8.1668e-05	intron (NM_001002827, intron 9 of 29)	-intron (NM_001002827, intron 9 of 29)	7952	NM_001002827	Notch4
chr9	92382681	92382957	-0.260849	10	1.492e-10	8.43e-05	Intergenic	Intergenic	-29309	NM_030656	Agxt
chr12	19809209	19809336	-0.254147	11	1.6036e-10	9.0604e-05	promoter-TSS (NM_001107132)	-promoter-TSS (NM_001107132)	-113	NM_001107132	Nyap1
chr8	108799789	108799915	-0.199358	10	1.6101e-10	9.0971e-05	Intergenic	Intergenic	-265548	NM_001191882	Nphp3
chr2	182518110	182518291	-0.303634	10	1.7291e-10	9.7696e-05	Intergenic	Intergenic	-18924	NM_001024888	Gatad2b
chr6	72765299	72765425	-0.156357	10	1.8795e-10	0.00010619	Intergenic	Intergenic	80131	NM_001047869	Arhgap5
chr6	137341278	137341595	-0.355185	11	1.9161e-10	0.00010826	intron (NM_001126280, intron 3 of 3)	-intron (NM_001126280, intron 3 of 3)	9122	NM_001126280	Tmem179
chr1	73710422	73710536	-0.193353	11	2.1555e-10	0.00012178	Intergenic	Intergenic	11507	NM_001008943	Vom1r62
chr10	63383402	63383814	-0.248826	14	2.4285e-10	0.00013721	TTS (NM_001007611)	-TTS (NM_001007611)	7071	NM_001007611	Fam101b
chr20	47330726	47330952	-0.173882	14	2.4778e-10	0.00013999	intron (NM_001014249, intron 3 of 3)	-intron (NM_001014249, intron 3 of 3)	-171515	NM_012752	Cd24
chr11	84370609	84370736	-0.159529	18	3.0944e-10	0.00017483	exon (NM_053930, exon 2 of 2)	-exon (NM_053930, exon 2 of 2)	878	NM_053930	Gp1bb
chr7	139360908	139361108	-0.160749	12	3.2227e-10	0.00018208	intron (NM_199497, intron 2 of 23)	-intron (NM_001270794, intron 2 of 22)	-1240	NM_001013107	Dazap2
chr4	117949326	117949435	-0.184153	10	3.4788e-10	0.00019655	exon (NM_001107867, exon 13 of 14)	-exon (NM_001107867, exon 13 of 14)	17409	NM_001107867	Atp6v1b1
chr1	228937168	228937270	-0.224646	10	3.5624e-10	0.00020127	intron (NM_053706, intron 1 of 4)	-intron (NM_053706, intron 1 of 4)	613	NM_053706	Dmrt1
chr9	84725582	84725754	-0.325504	10	3.7598e-10	0.00021243	promoter-TSS (NM_001108805)	-promoter-TSS (NM_001108805)	-483	NM_001108805	Spata3
chr7	114326791	114327233	-0.201909	24	3.8323e-10	0.00021652	TTS (NM_001304747)	-TTS (NM_001304747)	2525	NM_001304747	Smpd5
chr16	7382420	7382609	-0.239231	10	3.8984e-10	0.00022026	Intergenic	Intergenic	-163853	NM_001107295	Oxnad1
chr5	142722073	142722380	-0.180021	10	4.3205e-10	0.00024411	promoter-TSS (NM_001291383)	-promoter-TSS (NM_001291383)	-993	NM_001291383	LOC100361083
chr14	42585518	42585609	-0.241575	12	4.4295e-10	0.00025026	Intergenic	Intergenic	142939	NM_001191935	Grxcr1
chr19	54447831	54448506	-0.237344	23	4.8454e-10	0.00027377	Intergenic	Intergenic	-31792	NM_001106196	Galnt2
chr18	81290517	81290985	-0.180064	12	4.9488e-10	0.00027961	Intergenic	Intergenic	-57802	NM_001010920	Cndp2
chr4	40402674	40402915	-0.161458	10	5.0377e-10	0.00028463	promoter-TSS (NM_001271104)	-promoter-TSS (NM_001271104)	-664	NM_001271104	Foxp2
chr7	62225152	62225638	-0.275059	10	5.3491e-10	0.00030222	promoter-TSS (NM_053019)	-promoter-TSS (NM_053019)	-142	NM_053019	Avpr1a
chr12	39132292	39132570	-0.238885	16	5.5674e-10	0.00031455	Intergenic	Intergenic	329284	NM_001109066	RGD1562310
chr7	141865487	141865584	-0.379908	10	5.7681e-10	0.0003259	Intergenic	Intergenic	68602	NM_001109884	Hoxc4
chr4	18831544	18831698	-0.185991	10	5.9822e-10	0.00033799	intron (NM_001104633, intron 1 of 17)	-intron (NM_001104633, intron 1 of 17)	718	NM_001104633	Sema3d
chr1	95524275	95524434	-0.160512	10	6.2832e-10	0.000355	Intergenic	Intergenic	9056	NM_001108482	Prrg2
chr7	32414512	32414658	-0.285431	10	7.6647e-10	0.00043305	Intergenic	Intergenic	102996	NM_001108085	Cradd
chr15	24311902	24312242	-0.289086	10	8.0158e-10	0.00045289	intron (NM_001107259, intron 2 of 6)	-intron (NM_001107259, intron 2 of 6)	84338	NM_001107259	Peli2
chr10	109551066	109551337	-0.204894	10	8.6544e-10	0.00048897	Intergenic	Intergenic	40571	NM_001195482	LOC690871
chr3	57260558	57260882	-0.160622	10	8.7717e-10	0.0004956	Intergenic	Intergenic	-22962	NM_001105886	Hoxd13
chr2	190066200	190066582	-0.26553	16	9.0091e-10	0.00050901	Intergenic	Intergenic	-3098	NM_017308	Sema6c
chr17	50186911	50186990	-0.161219	10	9.5126e-10	0.00053746	promoter-TSS (NM_001162930)	-promoter-TSS (NM_001162930)	-34	NM_001162931	Pom121l2
chr12	38097039	38097283	-0.228119	17	9.907e-10	0.00055974	Intergenic	Intergenic	69509	NM_181638	Tbx3
chr1	97207434	97207582	-0.152082	12	1.0359e-09	0.0005853	promoter-TSS (NM_001100634)	-promoter-TSS (NM_001100634)	43	NM_001100634	Tph1
chr6	135586872	135587057	-0.302141	10	1.0847e-09	0.00061286	Intergenic	Intergenic	22519	NM_001106758	Cinp
chr1	242896101	242896231	-0.156467	10	1.2938e-09	0.00073097	intron (NM_053758, intron 2 of 32)	-intron (NM_053758, intron 2 of 32)	101308	NM_053758	Plce1
chr12	45380568	45380698	-0.2083	10	1.3076e-09	0.00073878	Intergenic	Intergenic	-25518	NM_001191928	Mn1
chr2	193918692	193919016	-0.296585	12	1.3131e-09	0.00074188	Intergenic	Intergenic	-97048	NM_001106451	Tbx15
chr3	154075225	154075479	-0.199663	10	1.3927e-09	0.00078689	promoter-TSS (NM_199392)	-promoter-TSS (NM_199392)	-190	NM_199392	Tox2
chr17	82708277	82709046	-0.156197	20	1.6775e-09	0.0009478	intron (NM_017197, intron 1 of 12)	-intron (NM_001083586, intron 1 of 12)	308	NM_017197	Celf2
chr14	87419319	87419804	-0.198766	16	1.6868e-09	0.00095302	intron (NM_020100, intron 1 of 2)	-intron (NM_020100, intron 1 of 2)	2272	NM_020100	Ramp3
chr9	85290374	85290523	-0.167212	10	1.6937e-09	0.00095691	promoter-TSS (NM_021740)	-promoter-TSS (NM_021740)	-754	NM_021740	Ptma
chr17	62770193	62770394	-0.204857	10	1.7434e-09	0.00098503	promoter-TSS (NM_001110860)	-promoter-TSS (NM_001110860)	-338	NM_001110860	Crem
chr4	125584895	125585074	-0.168648	15	1.832e-09	0.0010351	intron (NM_001100473, intron 1 of 3)	-intron (NM_001100473, intron 1 of 3)	1438	NM_001100473	Wnt7a
chrX	26777722	26777975	-0.226253	10	1.917e-09	0.0010831	intron (NM_001271227, intron 2 of 9)	-intron (NM_001271227, intron 2 of 9)	3271	NM_001271227	Tfe3
chr3	7920740	7921014	-0.344009	10	1.9426e-09	0.0010976	intron (NM_057109, intron 1 of 2)	-intron (NM_057109, intron 1 of 2)	4287	NM_057109	Barhl1
chr10	74136304	74136427	-0.307322	10	1.9467e-09	0.0010999	promoter-TSS (NM_001107034)	-promoter-TSS (NM_001107034)	-50	NM_001107034	Tbx4
chr3	3341695	3341832	-0.165445	10	1.9752e-09	0.001116	promoter-TSS (NM_001143750)	-promoter-TSS (NM_001143750)	-161	NM_001143750	Nrarp
chr12	12141012	12141253	-0.187861	12	2.0014e-09	0.0011308	Intergenic	Intergenic	-1462	NM_001107123	Tnrc18
chr3	158913636	158913917	-0.259821	10	2.0973e-09	0.0011849	Intergenic	Intergenic	87360	NM_001301720	Cebpb
chr10	108309097	108309215	-0.211608	10	2.185e-09	0.0012345	Intergenic	Intergenic	-12772	NM_001107069	Usp36
chr2	30441739	30442062	-0.223555	17	2.324e-09	0.0013131	intron (NM_019217, intron 2 of 6)	-intron (NM_019217, intron 2 of 6)	66453	NM_019217	Map1b
chr1	16480748	16480969	-0.335996	12	2.3337e-09	0.0013186	Intergenic	Intergenic	148058	NM_001002277	Ahi1
chr7	1054150	1054370	-0.172691	15	2.3393e-09	0.0013217	Intergenic	Intergenic	83407	NM_173305	Hsd17b6
chr17	12246339	12246542	-0.185377	10	2.4862e-09	0.0014047	exon (NM_198050, exon 5 of 18)	-exon (NM_198050, exon 5 of 18)	16060	NM_198050	Kif27
chr8	68596694	68596839	-0.207317	12	2.5861e-09	0.0014611	Intergenic	Intergenic	-53728	NM_001008380	Dis3l
chr10	84332197	84332710	-0.228731	13	2.6997e-09	0.0015253	Intergenic	Intergenic	-51448	NM_012610	Ngfr
chr11	29967706	29967960	-0.19727	10	2.7604e-09	0.0015596	Intergenic	Intergenic	-151491	NM_017050	Sod1
chr7	127818070	127818172	-0.291124	10	2.7751e-09	0.0015679	intron (NM_021676, intron 2 of 23)	-intron (NM_021676, intron 2 of 23)	1151	NM_021676	Shank3
chr16	18385389	18385552	-0.178044	12	2.8196e-09	0.0015931	Intergenic	Intergenic	21576	NM_153731	Zfp709
chr20	10948330	10948729	-0.169364	12	2.8213e-09	0.001594	Intergenic	Intergenic	24892	NM_001003964	Dnmt3l
chr19	25033380	25033928	-0.19897	32	2.9242e-09	0.0016522	intron (NM_030866, intron 1 of 9)	-intron (NM_030866, intron 1 of 9)	15302	NM_030866	Nfix
chr16	18828708	18828841	-0.338766	10	3.0255e-09	0.0017094	exon (NM_022861_1, exon 39 of 40)	-exon (NM_022861_1, exon 39 of 40)	17813	NM_001106067	Colgalt1
chr8	43743179	43743294	-0.195006	10	3.0594e-09	0.0017285	intron (NM_173154, intron 1 of 6)	-intron (NM_173154, intron 1 of 6)	-40798	NM_024351_1	Hspa8
chr16	18690031	18690169	-0.196435	10	3.154e-09	0.001782	Intergenic	Intergenic	11668	NM_198134	Bst2
chr19	20740396	20740838	-0.217255	17	3.1889e-09	0.0018017	Intergenic	Intergenic	-200637	NM_001109127	Cbln1
chr3	169689076	169689226	-0.155039	15	3.3067e-09	0.0018683	Intergenic	Intergenic	9389	NM_053340	Ogfr
chr1	42023649	42023810	-0.166799	10	3.3683e-09	0.0019031	Intergenic	Intergenic	87492	NM_012670	Tcp1
chr1	253671381	253671463	-0.167905	10	3.4832e-09	0.001968	promoter-TSS (NM_001106367)	-promoter-TSS (NM_001106367)	97	NM_001106367	Sorcs3
chr3	62231472	62231605	-0.2455	10	3.555e-09	0.0020086	Intergenic	Intergenic	-3603	NM_019218	Neurod1
chr1	262067267	262067720	-0.257457	10	3.6258e-09	0.0020486	intron (NM_001191052, intron 4 of 14)	-intron (NM_001191052, intron 4 of 14)	35671	NM_001191052	Tcf7l2
chr3	118731022	118731207	-0.259195	10	3.7663e-09	0.002128	Intergenic	Intergenic	-16342	NM_023967	Gfra4
chr6	9040878	9041150	-0.195225	10	4.2616e-09	0.0024078	Intergenic	Intergenic	25640	NM_023990	Six3
chr14	5951107	5951316	-0.359287	10	4.304e-09	0.0024318	intron (NM_001107205, intron 1 of 15)	-intron (NM_001107205, intron 1 of 15)	270	NM_001107205	Abcg3l3
chr1	168379242	168379555	-0.204311	13	4.3729e-09	0.0024707	promoter-TSS (NM_012715)	-promoter-TSS (NM_012715)	-856	NM_012715	Adm
chr2	197100426	197100721	-0.287024	10	4.5847e-09	0.0025903	exon (NM_001106457, exon 2 of 2)	-exon (NM_001106457, exon 2 of 2)	1058	NM_001106457	Nhlh2
chr4	119419757	119420007	-0.18657	10	4.6253e-09	0.0026133	Intergenic	Intergenic	-50574	NM_019181	Spr
chr2	57462789	57463039	-0.170062	13	4.6723e-09	0.0026398	intron (NM_001013909, intron 17 of 17)	-intron (NM_001013909, intron 17 of 17)	63602	NM_019139	Gdnf
chr10	14503430	14503573	-0.205722	15	4.7978e-09	0.0027108	Intergenic	Intergenic	-10327	NR_037321	Mir3547
chr17	10422625	10423007	-0.230932	18	5.1197e-09	0.0028926	Intergenic	Intergenic	-386150	NM_181626	Isca1
chr7	10061622	10061773	-0.174783	14	5.3081e-09	0.0029991	Intergenic	Intergenic	-1242	NM_054002	Zbtb7a
chr3	90198154	90198261	-0.223209	10	5.8624e-09	0.0033123	intron (NM_001109203, intron 1 of 5)	-intron (NM_001109203, intron 1 of 5)	446	NM_001109203	Prrg4
chr3	11750897	11751159	-0.206348	10	5.9229e-09	0.0033464	TTS (NM_001100869)	-TTS (NM_001100869)	7842	NM_001100869	LOC499781
chr10	72804385	72804522	-0.331768	10	6.1869e-09	0.0034956	intron (NM_145880, intron 1 of 4)	-intron (NM_145880, intron 1 of 4)	1345	NM_145880	Lhx1
chr1	204173872	204174085	-0.275151	14	6.2204e-09	0.0035145	Intergenic	Intergenic	-1975	NM_001002288	Mrgpre
chr6	11180396	11180564	-0.219823	10	6.4935e-09	0.0036688	exon (NM_138541, exon 3 of 9)	-exon (NM_138541, exon 3 of 9)	3816	NM_138541	Epcam
chr17	59485410	59485534	-0.187027	10	6.5896e-09	0.0037231	promoter-TSS (NM_001012161)	-promoter-TSS (NM_001012161)	21	NM_001012161	Tbce
chr1	174577263	174577597	-0.279921	13	6.607e-09	0.0037329	Intergenic	Intergenic	-28247	NM_021663	Nucb2
chr10	92884782	92884986	-0.186274	10	6.6919e-09	0.0037809	exon (NM_001107055, exon 3 of 4)	-exon (NM_001107055, exon 3 of 4)	16757	NM_001107055	Wnt9b
chr20	14198752	14198970	-0.268948	10	6.8659e-09	0.0038792	Intergenic	Intergenic	-24725	NM_013189	Gnaz
chr17	17576211	17576318	-0.154778	14	7.1555e-09	0.0040429	promoter-TSS (NM_001108406)	-promoter-TSS (NM_001108406)	-136	NM_001108406	Sptlc1
chr11	64151127	64151198	-0.351385	12	8.0789e-09	0.0045646	Intergenic	Intergenic	19119	NM_199113	Popdc2
chr13	41202293	41202791	-0.168568	10	8.7719e-09	0.0049561	Intergenic	Intergenic	-70029	NM_053799	Dars
chr13	72061149	72061559	-0.175795	18	9.244e-09	0.0052228	intron (NM_001100680, intron 7 of 10)	-intron (NM_001100680, intron 7 of 10)	22156	NM_001109383	Angptl1
chr19	19280334	19280564	-0.324111	10	9.6086e-09	0.0054288	intron (NM_001107415, intron 1 of 2)	-intron (NM_001107415, intron 1 of 2)	1566	NM_001107415	Sall1
chr12	8309228	8309414	-0.285356	10	9.7167e-09	0.0054899	Intergenic	Intergenic	13218	NM_023963	Cdx2
chr1	136526840	136527038	-0.158454	10	9.8121e-09	0.0055438	Intergenic	Intergenic	115606	NM_001108489	Iqgap1
chr15	106293432	106293625	-0.162988	10	9.9258e-09	0.005608	intron (NM_001127494, intron 1 of 9)	-intron (NM_001127494, intron 1 of 9)	13605	NM_001127494	Stk24
chr8	124051976	124052032	-0.170086	10	1.0073e-08	0.0056915	exon (NM_017035, exon 1 of 15)	-exon (NM_017035, exon 1 of 15)	189	NM_017035	Plcd1
chr10	38960534	38960751	-0.192818	10	1.0086e-08	0.0056985	Intergenic	Intergenic	-27387	NM_001107002	Sept8
chr2	614678	614879	-0.184712	22	1.0511e-08	0.0059389	Intergenic	Intergenic	-839099	NM_030836	Erap1
chr12	34595347	34595518	-0.195604	12	1.0544e-08	0.0059576	Intergenic	Intergenic	22596	NM_001271309	Tmem120b
chr6	76905694	76905831	-0.21722	13	1.0576e-08	0.0059754	Intergenic	Intergenic	14370	NM_013093	Nkx2-1
chr19	25777235	25777362	-0.216828	10	1.1261e-08	0.0063622	promoter-TSS (NM_001105944)	-promoter-TSS (NM_001105944)	-597	NM_001105944	Rfx1
chr10	104052658	104053090	-0.152297	20	1.1301e-08	0.0063848	Intergenic	Intergenic	-492770	NM_001077592	Rpl38
chr11	63856250	63856437	-0.276921	10	1.1618e-08	0.0065639	intron (NM_001105879, intron 1 of 11)	-intron (NM_001105879, intron 1 of 11)	41428	NM_001105879	Arhgap31
chr10	18429054	18429240	-0.207234	13	1.2064e-08	0.006816	Intergenic	Intergenic	-16044	NM_001106994	Ranbp17
chr5	172634402	172634587	-0.252694	10	1.2512e-08	0.0070692	Intergenic	Intergenic	-2904	NM_001013938	Vwa1
chr3	162558962	162559255	-0.247004	10	1.2744e-08	0.0072004	Intergenic	Intergenic	362533	NM_001109210	Cbln4
chr5	152846316	152846375	-0.259947	10	1.3567e-08	0.0076652	Intergenic	Intergenic	-1803	NM_053983	Cd52
chr4	117275624	117275986	-0.179114	12	1.3977e-08	0.0078971	intron (NM_001109407, intron 9 of 11)	-intron (NM_001109407, intron 9 of 11)	5798	NM_001172125	Tlx2
chr12	10370687	10370786	-0.276145	12	1.4634e-08	0.0082679	promoter-TSS (NM_001034199)	-promoter-TSS (NM_001034199)	-422	NM_001034199	Nptx2
chr13	13791257	13791316	-0.234668	10	1.5222e-08	0.0086003	Intergenic	Intergenic	73148	NM_001105948	Serpinb8
chr17	13801684	13801898	-0.233676	10	1.5505e-08	0.0087603	Intergenic	Intergenic	22567	NM_021692	Smad5
chr12	5195978	5196272	-0.22958	10	1.5529e-08	0.0087738	Intergenic	Intergenic	-60162	NM_001170398	Fry
chr4	182388738	182389147	-0.26865	15	1.5663e-08	0.0088495	Intergenic	Intergenic	303974	NM_017253	Bcat1
chr14	104672115	104672523	-0.174513	10	1.7302e-08	0.0097753	Intergenic	Intergenic	100717	NM_001025278	Pus10
chr12	38150526	38150660	-0.194408	10	1.7333e-08	0.0097931	Intergenic	Intergenic	16077	NM_181638	Tbx3
chr2	193212228	193212386	-0.158175	11	1.9162e-08	0.010827	Intergenic	Intergenic	-25158	NM_001271334	Zfp697
chr2	191920608	191920753	-0.176633	10	2.0029e-08	0.011316	Intergenic	Intergenic	-21364	NM_001031645	Acp6
chr13	100798799	100799038	-0.178092	10	2.1112e-08	0.011928	exon (NM_001100811, exon 3 of 7)	-exon (NM_001100811, exon 3 of 7)	7339	NM_001100811	Marc1
chr13	76463339	76463476	-0.155791	12	2.1208e-08	0.011982	Intergenic	Intergenic	-85048	NM_001012027	Serpinc1
chr8	51131088	51131380	-0.294271	12	2.2256e-08	0.012575	Intergenic	Intergenic	365589	NM_001012201	Cadm1
chr3	116018087	116018482	-0.224817	10	2.2633e-08	0.012788	Intergenic	Intergenic	137439	NR_110721	LOC102550367
chr1	179083248	179083389	-0.30936	10	2.6381e-08	0.014905	Intergenic	Intergenic	110380	NM_001106293	Abca15
chr13	107233695	107233873	-0.183989	11	2.7892e-08	0.015759	Intergenic	Intergenic	-9940	NM_012912	Atf3
chr7	22282755	22282946	-0.196778	13	2.7938e-08	0.015785	intron (NM_001108741, intron 1 of 20)	-intron (NM_001108741, intron 1 of 20)	3578	NM_001108741	Appl2
chr19	50528609	50528999	-0.175871	10	2.9663e-08	0.016759	Intergenic	Intergenic	63250	NM_001107436	RGD1304884
chr6	132385771	132385905	-0.163808	12	2.9871e-08	0.016877	Intergenic	Intergenic	-2133	NM_001277288	Bcl11b
chr16	19150829	19150984	-0.156648	16	3.0183e-08	0.017053	Intergenic	Intergenic	-4339	NM_001134796	Mast3
chr20	4837479	4837790	-0.214233	12	3.0431e-08	0.017193	promoter-TSS (NM_198740)	-promoter-TSS (NM_198740)	-863	NM_198740	RT1-DMb
chr4	93302835	93303292	-0.183448	10	3.1104e-08	0.017574	intron (NM_024379, intron 3 of 15)	-intron (NM_024379, intron 3 of 15)	660637	NM_024379	Grid2
chr8	69350088	69350228	-0.296471	10	3.1184e-08	0.017619	Intergenic	Intergenic	73117	NM_001108159	Dpp8
chr1	262699779	262699898	-0.187533	10	3.2368e-08	0.018288	intron (NM_022260, intron 1 of 5)	-intron (NM_022260, intron 1 of 5)	10539	NM_022260	Casp7
chr6	3448064	3448103	-0.310117	14	3.5228e-08	0.019904	Intergenic	Intergenic	-57423	NM_001100716	Sos1
chrX	90843013	90843206	-0.169369	19	3.553e-08	0.020074	Intergenic	Intergenic	-44264	NM_001014222	Dmrtc1c1
chrX	87600430	87600640	-0.160986	10	3.7279e-08	0.021062	Intergenic	Intergenic	-381768	NM_001305243	Eda
chr3	132852885	132853187	-0.157136	15	3.7822e-08	0.02137	intron (NM_001106519, intron 3 of 3)	-intron (NM_001106519, intron 3 of 3)	18170	NM_001106519	Ovol2
chr16	72285818	72286005	-0.174391	10	3.808e-08	0.021515	Intergenic	Intergenic	419572	NM_023973	Ido1
chr10	10550294	10550707	-0.29955	10	3.9782e-08	0.022477	intron (NM_001135710, intron 1 of 15)	-intron (NM_001135710, intron 1 of 15)	583	NM_001135710	Sec14l5
chr5	152992924	152993293	-0.161509	12	3.9934e-08	0.022563	Intergenic	Intergenic	-3056	NM_001106689	Zfp593
chr13	100682825	100683359	-0.314973	13	4.0174e-08	0.022698	Intergenic	Intergenic	8566	NM_001077674	Hlx
chr19	32361778	32362023	-0.186633	10	4.0481e-08	0.022872	intron (NM_001109501, intron 6 of 22)	-intron (NM_001109501, intron 6 of 22)	100130	NM_001109501	Arhgap10
chr6	95467992	95468054	-0.241094	10	4.0924e-08	0.023122	Intergenic	Intergenic	7366	NM_053759	Six1
chr10	107014060	107014213	-0.249163	10	4.2029e-08	0.023746	Intergenic	Intergenic	-5732	NM_001107068	Mgat5b
chr20	12819129	12819405	-0.262601	10	4.2428e-08	0.023972	intron (NM_013191, intron 1 of 2)	-intron (NM_013191, intron 1 of 2)	2434	NR_032769	Mir678
chr7	10907390	10907594	-0.219923	10	4.2578e-08	0.024056	exon (NM_001106769, exon 14 of 14)	-exon (NM_001106769, exon 14 of 14)	5898	NM_001007657	RGD1359127
chr14	103827185	103827457	-0.186127	16	4.5796e-08	0.025875	Intergenic	Intergenic	-115928	NM_053490	Xpo1
chr11	61411385	61411750	-0.157832	13	4.857e-08	0.027442	Intergenic	Intergenic	-540693	NM_017242	Lsamp
chr1	201617199	201617336	-0.309966	12	5.1003e-08	0.028816	TTS (NM_001014027)	-TTS (NM_001014027)	102	NM_001014163	Cend1
chr2	52120904	52121208	-0.200915	19	5.2397e-08	0.029604	Intergenic	Intergenic	-276422	NM_001100698	Zfp131
chr19	16459060	16459321	-0.162841	12	5.2428e-08	0.029622	Intergenic	Intergenic	114012	NM_001107413	Irx3
chr7	120597816	120597920	-0.256767	10	5.548e-08	0.031346	intron (NM_001098240_3, intron 9 of 9)	-intron (NM_001098240_3, intron 9 of 9)	-10648	NM_001207022	Shisa8
chr4	125972278	125972925	-0.212275	11	5.9331e-08	0.033522	intron (NM_138535, intron 10 of 23)	-intron (NM_138535, intron 10 of 23)	29201	NM_138535	Grip2
chr2	174780184	174780320	-0.184917	14	5.9509e-08	0.033622	promoter-TSS (NM_021757)	-promoter-TSS (NM_021757)	-163	NM_021757	Plrg1
chr19	52509705	52509867	-0.28238	10	5.9516e-08	0.033626	Intergenic	Intergenic	-16928	NM_001242627	Zfpm1
chr7	9595051	9595178	-0.24605	10	6.2336e-08	0.03522	exon (NM_001039013, exon 16 of 20)	-exon (NM_001039013, exon 16 of 20)	12372	NM_001039013	Tle2
chr12	32576712	32576999	-0.290525	10	6.6037e-08	0.037311	intron (NM_001108334, intron 1 of 46)	-intron (NM_001108334, intron 1 of 46)	14063	NM_001108334	Ncor2
chr3	4075772	4075923	-0.240649	10	6.7955e-08	0.038394	exon (NM_021853, exon 19 of 32)	-exon (NM_021853, exon 19 of 32)	25508	NM_021853	Kcnt1
chr8	97770492	97770647	-0.176466	10	6.8654e-08	0.038789	Intergenic	Intergenic	245291	NM_175869	Plod2
chr1	242539192	242539317	-0.224377	10	6.955e-08	0.039295	intron (NM_001014246, intron 7 of 13)	-intron (NM_001014246, intron 7 of 13)	11570	NM_001014246	Fra10ac1
chr16	20031095	20031230	-0.159739	16	7.3213e-08	0.041365	exon (NM_001107307, exon 8 of 8)	-exon (NM_001107307, exon 8 of 8)	6174	NM_001107307	Cilp2
chr14	97692518	97692748	-0.171151	13	7.5897e-08	0.042882	intron (NM_031507, intron 1 of 27)	-intron (NM_031507, intron 1 of 27)	75275	NM_031507	Egfr
chr10	106642705	106642901	-0.167541	13	7.6625e-08	0.043293	exon (NM_133386, exon 1 of 5)	-exon (NM_133386, exon 1 of 5)	1329	NM_001270811	Sphk1
chr20	13594059	13594152	-0.291625	10	8.1965e-08	0.04631	exon (NM_024131, exon 1 of 3)	-exon (NM_024131, exon 1 of 3)	147	NM_024131	Ddt
chr9	5686142	5686296	-0.216464	10	8.5825e-08	0.048491	Intergenic	Intergenic	-212885	NM_001109414	Dazl
chrX	89379021	89379577	-0.238954	10	8.7453e-08	0.049411	exon (NM_134336, exon 2 of 8)	-exon (NM_134336, exon 2 of 8)	3106	NM_134336	Nlgn3
chr18	31004302	31004419	-0.240548	10	8.8153e-08	0.049806	Intergenic	Intergenic	-113686	NM_001107392	Fchsd1
chr1	95887695	95887772	-0.164538	10	8.8467e-08	0.049984	exon (NM_013184, exon 3 of 3)	-exon (NM_013184, exon 3 of 3)	2157	NM_013184	Ntf4
chr1	192600626	192600770	-0.187628	10	9.3017e-08	0.052554	Intergenic	Intergenic	-107763	NM_053335	Ctbp2
chr3	105842965	105843071	-0.24932	10	9.3104e-08	0.052604	Intergenic	Intergenic	-1653	NM_001107760	Dll4
chr19	20407057	20407516	-0.181686	18	9.8872e-08	0.055863	Intergenic	Intergenic	-68578	NM_053583	Zfp423
chr12	44928956	44929282	-0.22773	10	1.0362e-07	0.058547	Intergenic	Intergenic	425996	NM_001191928	Mn1
chr13	81740164	81740308	-0.17489	10	1.0486e-07	0.059245	promoter-TSS (NM_001100639)	-promoter-TSS (NM_001100639)	-278	NM_001100639	Pou2f1
chr12	16155857	16155969	-0.171084	10	1.0886e-07	0.061507	intron (NM_012801, intron 3 of 6)	-intron (NM_012801, intron 3 of 6)	4868	NM_012801	Pdgfa
chr8	19832265	19832429	-0.15039	10	1.0947e-07	0.061853	intron (NM_021760, intron 1 of 66)	-intron (NM_021760, intron 1 of 66)	1894	NM_021760	Col5a3
chr17	4281638	4281756	-0.17309	12	1.1468e-07	0.064795	Intergenic	Intergenic	-261793	NM_031007	Adcy2
chr1	42006710	42006876	-0.167122	13	1.1644e-07	0.065787	Intergenic	Intergenic	84773	NM_001006995	Acat2
chr11	72011347	72011539	-0.194603	12	1.1653e-07	0.065839	exon (NM_001039002, exon 1 of 1)	-exon (NM_001039002, exon 1 of 1)	1443	NM_001039002	Fam43a
chr17	23358911	23359091	-0.215065	12	1.1816e-07	0.066761	Intergenic	Intergenic	256442	NM_001108881	Rnf144b
chr1	135507010	135507179	-0.267181	10	1.1858e-07	0.066997	intron (NM_001308145, intron 3 of 8)	-intron (NM_001308145, intron 3 of 8)	3378	NM_001308145	Plin1
chr3	11326489	11326622	-0.227815	10	1.1871e-07	0.067073	Intergenic	Intergenic	-22230	NM_053406	Pomt1
chr1	69449663	69449886	-0.278433	12	1.1876e-07	0.067101	exon (NM_001108469, exon 1 of 1)	-exon (NM_001108469, exon 1 of 1)	363	NM_001108469	Cdc42ep5
chr12	19854833	19854937	-0.170574	10	1.1956e-07	0.06755	Intergenic	Intergenic	-1253	NM_001100678	Mepce
chr2	78751520	78751664	-0.213825	10	1.2395e-07	0.070031	Intergenic	Intergenic	-141427	NM_001108545	Fbxl7
chr18	67223556	67223779	-0.281715	10	1.2678e-07	0.071629	intron (NM_001106137, intron 4 of 9)	-intron (NM_001106137, intron 4 of 9)	6912	NM_001106137	Poli
chr12	46392691	46393151	-0.152134	10	1.2734e-07	0.071945	Intergenic	Intergenic	90459	NM_001270418	Lrcol1
chr2	140282667	140282948	-0.312321	12	1.3008e-07	0.073497	exon (NM_001109556, exon 4 of 4)	-exon (NM_001109556, exon 4 of 4)	7564	NM_001109556	Mgarp
chr4	58012616	58012747	-0.210762	10	1.3097e-07	0.073997	exon (NM_001135094, exon 1 of 1)	-exon (NM_001135094, exon 1 of 1)	778	NM_001135094	Klf14
chr1	240791809	240791930	-0.178738	10	1.3114e-07	0.074092	intron (NM_001107608, intron 1 of 20)	-intron (NM_001107608, intron 1 of 20)	116	NM_001107608	Hectd2
chr12	20735904	20736016	-0.46	10	1.3151e-07	0.074305	Intergenic	Intergenic	-25391	NM_001011902	Ift22
chr16	19125689	19125833	-0.163852	10	1.3283e-07	0.075048	TTS (NM_001170604)	-TTS (NM_001170604)	11823	NM_001170604	Il12rb1
chr3	135467689	135467820	-0.296822	10	1.3783e-07	0.077871	Intergenic	Intergenic	-183304	NM_001108596	Xrn2
chr3	10202630	10202816	-0.192383	10	1.3881e-07	0.07843	promoter-TSS (NM_138914)	-promoter-TSS (NM_138914)	-524	NM_138914	Fnbp1
chr19	29004989	29005520	-0.248202	10	1.5065e-07	0.085116	intron (NM_001108444, intron 1 of 9)	-intron (NM_001108444, intron 1 of 9)	24971	NM_001108444	Gab1
chr13	96512610	96512776	-0.238343	10	1.5786e-07	0.089188	Intergenic	Intergenic	51366	NM_182843	Acbd3
chr5	155722842	155723000	-0.166891	14	1.5986e-07	0.090321	Intergenic	Intergenic	-57741	NM_001008515	C1qa
chrX	150060633	150060769	-0.153689	10	1.6243e-07	0.091771	Intergenic	Intergenic	-1026	NM_001106947	Slitrk4
chr12	38311654	38311677	-0.15645	12	1.6352e-07	0.092386	Intergenic	Intergenic	-144996	NM_181638	Tbx3
chr7	21183860	21184230	-0.173636	13	1.6766e-07	0.09473	intron (NM_001191878, intron 23 of 27)	-intron (NM_001191878, intron 23 of 27)	87556	NM_001191878	Polr3b
chr20	7628185	7628505	-0.233449	10	1.7325e-07	0.097886	Intergenic	Intergenic	-7937	NM_001170481	Pi16
chr20	7535009	7535155	-0.279705	10	1.7369e-07	0.098135	intron (NM_001107616, intron 1 of 20)	-intron (NM_001107616, intron 1 of 20)	284	NM_001107616	Cpne5
chr7	72454420	72454664	-0.219623	10	1.7852e-07	0.10086	Intergenic	Intergenic	63134	NM_001126087	Zfp706
chr20	3813369	3813641	-0.231501	10	1.8066e-07	0.10207	exon (NM_001001970, exon 2 of 3)	-exon (NM_001001970, exon 2 of 3)	219	NM_001001970	Ly6g6d
chr12	45269698	45269872	-0.227189	10	1.8095e-07	0.10223	Intergenic	Intergenic	85330	NM_001191928	Mn1
chr9	92937045	92937255	-0.250881	12	1.864e-07	0.10531	Intergenic	Intergenic	-17247	NM_184049	Stk25
chr4	122318510	122318720	-0.169737	13	1.8877e-07	0.10666	Intergenic	Intergenic	15903	NM_001109248	Dnajb8
chr5	168056735	168057063	-0.193108	10	1.905e-07	0.10763	intron (NM_057143, intron 5 of 6)	-intron (NM_001277249, intron 5 of 6)	4717	NM_057143	Park7
chr17	83229416	83229692	-0.314828	11	1.969e-07	0.11125	intron (NM_001106120, intron 2 of 14)	-intron (NM_001106120, intron 2 of 14)	26929	NM_001106120	Usp6nl
chr10	92964216	92964612	-0.174017	24	2.0476e-07	0.11569	intron (NM_001105715, intron 4 of 4)	-intron (NM_001105715, intron 4 of 4)	38809	NM_001105715	Wnt3
chr5	129481593	129481684	-0.181429	10	2.0668e-07	0.11677	Intergenic	Intergenic	33191	NM_001106673	Gpx7
chr12	45228598	45228749	-0.161603	12	2.1331e-07	0.12052	Intergenic	Intergenic	126441	NM_001191928	Mn1
chr1	245512157	245512661	-0.279867	10	2.1992e-07	0.12426	Intergenic	Intergenic	-112875	NM_017365	Pdlim1
chr7	10778589	10778675	-0.210615	10	2.2063e-07	0.12466	Intergenic	Intergenic	-12679	NM_133524	Tcf3
chr14	35414892	35415072	-0.166718	10	2.2068e-07	0.12469	intron (NM_012802, intron 1 of 22)	-intron (NM_012802, intron 1 of 22)	3144	NM_012802	Pdgfra
chr14	83907106	83907362	-0.268477	10	2.2574e-07	0.12754	exon (NM_001107231, exon 1 of 4)	-exon (NM_001107231, exon 1 of 4)	-1071	NR_102353	Patz1
chr3	117409043	117409111	-0.182777	10	2.2611e-07	0.12775	intron (NM_001107773, intron 1 of 3)	-intron (NM_001107773, intron 1 of 3)	1822	NM_001107773	Stk35
chr6	136692640	136692821	-0.165957	10	2.284e-07	0.12905	Intergenic	Intergenic	-2520	NM_001024749_1	RGD1305713
chr20	27716861	27717099	-0.224339	10	2.321e-07	0.13114	intron (NM_053644, intron 27 of 66)	-intron (NM_053644, intron 27 of 66)	54347	NM_001044300	MGC112715
chr1	95105880	95106093	-0.186637	10	2.4052e-07	0.13589	exon (NM_001100690, exon 21 of 42)	-exon (NM_001100690, exon 21 of 42)	39346	NM_053997	Kcnc3
chr18	30629886	30629986	-0.192856	10	2.459e-07	0.13893	intron (NM_001014773, intron 1 of 2)	-intron (NM_001014773, intron 1 of 2)	-5097	NM_001037156	Pcdhga8
chr19	54829928	54830207	-0.273307	10	2.4622e-07	0.13912	intron (NM_001109134, intron 1 of 3)	-intron (NM_001109134, intron 1 of 3)	9470	NM_001109134	RGD1559896
chr8	113881302	113881484	-0.179455	10	2.4695e-07	0.13953	Intergenic	Intergenic	-1490	NM_031320	Celsr3
chr1	202233354	202233541	-0.162314	10	2.509e-07	0.14176	Intergenic	Intergenic	-3702	NM_001108510	Dusp8
chr16	83837945	83838085	-0.301573	10	2.5105e-07	0.14184	intron (NM_138893, intron 33 of 33)	-intron (NM_138893, intron 33 of 33)	158302	NM_001047978	LOC689713
chr15	40423306	40423419	-0.188346	14	2.527e-07	0.14278	Intergenic	Intergenic	-13302	NM_001006993	Sgcg
chr4	150937480	150937895	-0.207516	12	2.5651e-07	0.14493	intron (NM_001012097, intron 17 of 17)	-intron (NM_001012097, intron 17 of 17)	118048	NM_001015004	Vgll4
chr10	110000100	110000273	-0.20713	10	2.5998e-07	0.14689	TTS (NM_001126082)	-TTS (NM_001126082)	342	NM_153293	Npb
chr7	11322206	11322267	-0.227164	10	2.6161e-07	0.14781	intron (NM_001106768, intron 13 of 14)	-intron (NM_001106768, intron 13 of 14)	5024	NM_001077642	Cfd
chr4	146037279	146037416	-0.18243	17	2.6694e-07	0.15082	Intergenic	Intergenic	-295230	NM_031040	Grm7
chr3	107387319	107387455	-0.201095	10	2.6762e-07	0.1512	Intergenic	Intergenic	-15571	NM_001012354	Lrrc57
chr20	5988679	5988919	-0.225468	10	2.7539e-07	0.1556	intron (NM_001047939, intron 12 of 14)	-intron (NM_001039607, intron 3 of 4)	23878	NM_001047939	LOC499407
chr15	24727901	24728085	-0.208528	10	2.8964e-07	0.16365	Intergenic	Intergenic	-95558	NM_001100566	Otx2
chr14	67875443	67875899	-0.212231	12	2.9973e-07	0.16934	intron (NM_022632, intron 4 of 36)	-intron (NM_022632, intron 4 of 36)	16169	NM_022632	Slit2
chr5	171350584	171350904	-0.292298	12	3.1083e-07	0.17562	Intergenic	Intergenic	124421	NM_001013937	Actrt2
chr5	169394806	169394963	-0.230789	10	3.1337e-07	0.17705	Intergenic	Intergenic	5654	NM_019236	Hes2
chr4	122282194	122282551	-0.179032	13	3.2538e-07	0.18384	exon (NM_033442, exon 4 of 7)	-exon (NM_033442, exon 4 of 7)	2620	NM_033442	Gata2
chr7	879442	880101	-0.160019	21	3.5638e-07	0.20136	Intergenic	Intergenic	257895	NM_173305	Hsd17b6
chr10	66654163	66654275	-0.160342	10	3.5822e-07	0.20239	promoter-TSS (NM_139115)	-promoter-TSS (NM_139115)	-955	NM_139115	Coro6
chr12	35698285	35698433	-0.211059	10	3.6233e-07	0.20471	Intergenic	Intergenic	-26125	NM_001271380	Cux2
chr14	99691391	99691777	-0.169301	10	3.6336e-07	0.2053	Intergenic	Intergenic	140689	NM_001134702	Meis1
chr1	135345978	135346666	-0.166779	17	3.6872e-07	0.20832	Intergenic	Intergenic	40139	NM_183053	Rhcg
chr4	76936362	76936457	-0.178612	10	3.6966e-07	0.20886	Intergenic	Intergenic	15886	NM_001039008	Tmem176a
chr13	44188722	44188843	-0.158482	10	3.7072e-07	0.20946	promoter-TSS (NM_019365)	-promoter-TSS (NM_019365)	-290	NM_019365	Rassf5
chr15	21454225	21454593	-0.173903	10	3.7202e-07	0.21019	Intergenic	Intergenic	-27145	NM_001011915	Fermt2
chr10	84906542	84906859	-0.16012	15	3.751e-07	0.21193	Intergenic	Intergenic	-18819	NM_001107041	Hoxb13
chr11	85728603	85728772	-0.189864	16	3.7621e-07	0.21256	Intergenic	Intergenic	41823	NM_001105862	Hic2
chr1	136011048	136011522	-0.164858	11	3.7956e-07	0.21445	intron (NM_001170462, intron 1 of 12)	-intron (NM_001170462, intron 1 of 12)	10066	NM_001170462	Sema4b
chr9	74558052	74558174	-0.151811	12	3.825e-07	0.21611	promoter-TSS (NM_019278)	-promoter-TSS (NM_019278)	38	NM_019278	Resp18
chr15	39264512	39264862	-0.249609	11	3.9481e-07	0.22307	Intergenic	Intergenic	85388	NM_139091	Nupl1
chr8	55846614	55846763	-0.184188	17	4.3701e-07	0.24691	Intergenic	Intergenic	258403	NM_001103354	LOC100125362
chr6	123891169	123891400	-0.321492	10	4.8344e-07	0.27314	Intergenic	Intergenic	-128963	NM_001108047	Foxn3
chr10	13766431	13766678	-0.243039	10	4.9452e-07	0.2794	intron (NM_001127548, intron 4 of 20)	-intron (NM_001127548, intron 4 of 20)	12673	NM_001127548	Traf7
chr12	33623586	33623685	-0.18121	10	5.006e-07	0.28284	intron (NM_022238, intron 1 of 11)	-intron (NM_022238, intron 1 of 11)	253	NM_022238	Abcb9
chr3	115501676	115501798	-0.230455	10	5.0467e-07	0.28513	intron (NM_001106508, intron 11 of 19)	-intron (NM_001106508, intron 11 of 19)	136458	NM_001106508	Acoxl
chr19	47582224	47582378	-0.201843	10	5.1519e-07	0.29108	Intergenic	Intergenic	-28562	NM_017168	Plcg2
chr5	153505269	153505444	-0.193589	10	5.2194e-07	0.2949	exon (NM_001109271, exon 9 of 9)	-exon (NM_001109271, exon 9 of 9)	22166	NM_001109271	Ldlrap1
chr4	63780547	63780690	-0.161455	12	5.6165e-07	0.31733	Intergenic	Intergenic	-34768	NR_032737	Mir490
chr10	47832589	47832892	-0.213095	10	5.7256e-07	0.3235	intron (NM_001107007, intron 11 of 14)	-intron (NM_001107007, intron 11 of 14)	20379	NM_001025749	Grap
chr7	135250620	135250996	-0.196638	11	5.8287e-07	0.32932	Intergenic	Intergenic	65448	NM_138832	Slc38a1
chr7	10367456	10367947	-0.241323	10	6.2126e-07	0.35101	promoter-TSS (NM_001014200)	-promoter-TSS (NM_001014200)	373	NM_001108732	Lsm7
chr17	33304808	33304954	-0.180988	10	6.2311e-07	0.35205	Intergenic	Intergenic	-53390	NM_001107348	Rreb1
chr2	124692990	124693300	-0.228637	11	6.3599e-07	0.35933	Intergenic	Intergenic	479453	NM_001106427	Spry1
chr14	9346503	9346946	-0.163235	15	6.5062e-07	0.3676	Intergenic	Intergenic	131982	NM_031737	Nkx6-1
chr20	34905812	34905907	-0.239733	10	6.5331e-07	0.36912	exon (NM_001014032, exon 2 of 2)	-exon (NM_001014032, exon 2 of 2)	1920	NM_001014032	Msl3l2
chr14	8074845	8075491	-0.177539	15	6.5806e-07	0.3718	promoter-TSS (NM_001012032)	-promoter-TSS (NM_001012032)	-135	NM_001012032	Arhgap24
chr8	112837355	112837488	-0.338858	10	6.6978e-07	0.37842	exon (NM_001047871, exon 4 of 12)	-exon (NM_001047871, exon 4 of 12)	2688	NM_001047871	Ifrd2
chr5	153324572	153324789	-0.204704	11	6.7177e-07	0.37955	intron (NM_001108687, intron 9 of 11)	-intron (NM_001108687, intron 9 of 11)	-32688	NM_001013935	Mtfr1l
chr4	172398285	172398435	-0.158549	10	6.9322e-07	0.39167	Intergenic	Intergenic	83238	NM_012843	Emp1
chr6	11682999	11683282	-0.154155	12	7.0443e-07	0.398	Intergenic	Intergenic	-116312	NM_181631	Fbxo11
chr7	135655706	135655815	-0.189243	10	7.0591e-07	0.39884	Intergenic	Intergenic	94942	NM_130748	Slc38a4
chr9	73200138	73200670	-0.218483	10	7.261e-07	0.41025	Intergenic	Intergenic	243796	NM_001191810	Tns1
chr12	17563529	17563709	-0.189346	17	7.4581e-07	0.42138	intron (NM_001012021, intron 1 of 3)	-intron (NM_001012021, intron 1 of 3)	1307	NM_001012021	Zscan21
chr10	83886285	83886354	-0.191187	10	7.4738e-07	0.42227	Intergenic	Intergenic	-58110	NM_001107040	Dlx4
chr15	107583853	107583987	-0.219398	10	7.6741e-07	0.43358	Intergenic	Intergenic	15007	NM_001108391	Zic5
chr20	6256720	6257029	-0.183872	10	7.7213e-07	0.43625	intron (NM_001107613, intron 12 of 23)	-intron (NM_001107613, intron 12 of 23)	36537	NM_001007695	Tcp11
chr2	219408986	219409183	-0.161952	10	7.8409e-07	0.44301	Intergenic	Intergenic	-1309	NM_133584	Pde5a
chr7	137863963	137864069	-0.190377	10	7.8587e-07	0.44401	exon (NM_001271242, exon 1 of 2)	-exon (NM_001271242, exon 1 of 2)	454	NM_001271242	C1ql4
chrX	7463371	7463449	-0.170685	10	7.9635e-07	0.44993	Intergenic	Intergenic	-33275	NM_001024874	Rhox9
chr3	91055574	91055764	-0.174464	10	8.226e-07	0.46477	Intergenic	Intergenic	-71936	NM_013001	Pax6
chr16	50411262	50411595	-0.267492	10	8.4184e-07	0.47564	Intergenic	Intergenic	47156	NM_053676	Mtnr1a
chr13	47034748	47035069	-0.164296	10	8.5496e-07	0.48305	Intergenic	Intergenic	-4164	NM_017259	Btg2
chr5	165883906	165884135	-0.31167	10	9.212e-07	0.52047	Intergenic	Intergenic	-174490	NM_001011979	Tardbp
chr1	229107443	229107699	-0.175348	10	9.5825e-07	0.54141	Intergenic	Intergenic	-6495	NM_001107597	Dmrt2
chr19	25209406	25209526	-0.319719	10	1.007e-06	0.56897	intron (NM_012918, intron 36 of 47)	-intron (NM_012918, intron 36 of 47)	50190	NM_001009541	Ier2
chr3	171052354	171052508	-0.236459	10	1.0095e-06	0.57036	Intergenic	Intergenic	34501	NM_001014259	Polr3k
chr1	84489979	84490150	-0.178376	12	1.0238e-06	0.57844	exon (NM_001013066, exon 2 of 10)	-exon (NM_001013066, exon 2 of 10)	3512	NM_001013066	Sipa1l3
chr7	67285230	67285475	-0.231526	15	1.025e-06	0.5791	intron (NM_001080789, intron 10 of 15)	-intron (NM_001012198, intron 9 of 14)	3247	NM_001012198	Arhgap9
chr8	80042348	80042518	-0.239058	12	1.0299e-06	0.58188	Intergenic	Intergenic	-86354	NM_031770	Gnb5
chr7	141791124	141791268	-0.190143	10	1.0426e-06	0.58908	Intergenic	Intergenic	-5738	NM_001109884	Hoxc4
chr4	173667951	173668066	-0.197787	10	1.0454e-06	0.59064	promoter-TSS (NM_001013927)	-promoter-TSS (NM_001013927)	-250	NM_001013927	Plbd1
chr1	252793303	252793389	-0.16103	10	1.0482e-06	0.59224	intron (NM_001107606, intron 1 of 13)	-intron (NM_001107606, intron 1 of 13)	3430	NM_001107606	Sh3pxd2a
chr5	60916436	60916619	-0.22153	10	1.0567e-06	0.59705	Intergenic	Intergenic	129405	NM_001108662	Melk
chr5	166198958	166199242	-0.221991	10	1.1049e-06	0.62427	exon (NM_012835, exon 2 of 2)	-exon (NM_012835, exon 2 of 2)	1328	NM_012835	Cort
chr18	28552278	28552439	-0.227548	10	1.1331e-06	0.64021	Intergenic	Intergenic	-43777	NM_001107395	Psd2
chr17	84518725	84518917	-0.22882	10	1.1406e-06	0.64444	Intergenic	Intergenic	-45387	NM_001104630	Sephs1
chr7	116735003	116735185	-0.187971	10	1.2165e-06	0.6873	exon (NM_199110, exon 1 of 8)	-exon (NM_199110, exon 1 of 8)	186	NM_199110	Mfng
chr1	120696003	120696249	-0.226179	15	1.2349e-06	0.6977	exon (NM_001191624, exon 33 of 33)	-exon (NM_001191624, exon 33 of 33)	140198	NM_001191624	Lrrk1
chr6	7210650	7210810	-0.191776	10	1.2785e-06	0.72233	promoter-TSS (NM_020076)	-promoter-TSS (NM_020076)	-274	NM_020076	Haao
chrX	160539102	160539389	-0.230669	24	1.3103e-06	0.74031	Intergenic	Intergenic	-69063	NM_001000264	Olr1768
chr5	146067728	146067917	-0.220261	10	1.3118e-06	0.74115	Intergenic	Intergenic	-21411	NM_017284	Psmb2
chr20	12313959	12314424	-0.282843	10	1.3144e-06	0.74262	Intergenic	Intergenic	-122591	NM_001100741	Col6a2
chr18	77531984	77532554	-0.215862	17	1.317e-06	0.74409	exon (NM_001244933, exon 5 of 6)	-exon (NM_001244933, exon 5 of 6)	61586	NM_001244933	Nfatc1
chr1	197050062	197050509	-0.19807	23	1.3172e-06	0.7442	Intergenic	Intergenic	-4854	NM_001108506	Ebf3
chr5	153086683	153086851	-0.203653	10	1.3338e-06	0.75358	promoter-TSS (NM_012890)	-promoter-TSS (NM_012890)	-309	NM_012890	Slc30a2
chr16	74273187	74273478	-0.157236	13	1.3368e-06	0.75529	Intergenic	Intergenic	-3301	NM_001106091	Mrps31
chr3	91639221	91639692	-0.161985	10	1.3385e-06	0.75627	Intergenic	Intergenic	-76952	NM_001114621	Dcdc5
chr7	120928879	120929151	-0.284787	10	1.3472e-06	0.76118	intron (NM_001130574, intron 1 of 4)	-intron (NM_001130574, intron 1 of 4)	701	NM_001130574	Tcf20
chr4	162507197	162507386	-0.15082	12	1.3552e-06	0.76567	promoter-TSS (NM_001270870)	-promoter-TSS (NM_001270870)	-330	NM_001270870	Ntf3
chr3	42233415	42233646	-0.199839	14	1.3633e-06	0.77024	intron (NM_001100837, intron 1 of 29)	-intron (NM_001100837, intron 1 of 29)	17468	NM_001100837	Pla2r1
chr1	220715267	220715650	-0.173524	10	1.3712e-06	0.77471	Intergenic	Intergenic	114521	NM_022276	Gcnt1
chr7	13524328	13524504	-0.157518	10	1.3781e-06	0.7786	Intergenic	Intergenic	-35893	NM_001009537	Zfp799
chr10	104662157	104662447	-0.208723	10	1.4268e-06	0.80614	intron (NM_001271202, intron 3 of 19)	-intron (NM_001271202, intron 3 of 19)	14160	NM_001271202	Kif19
chr1	131411276	131411577	-0.179558	10	1.4315e-06	0.80878	Intergenic	Intergenic	-129522	NM_001039006	Klhl25
chr1	170033746	170034061	-0.219825	12	1.4341e-06	0.81028	Intergenic	Intergenic	-42105	NM_001139508	Mical2
chr10	90185350	90185468	-0.211228	14	1.4983e-06	0.84656	exon (NM_001037202, exon 11 of 13)	-exon (NM_001037202, exon 11 of 13)	6696	NM_001037202	Plekhh3
chr10	83641446	83642302	-0.190895	16	1.5686e-06	0.88624	Intergenic	Intergenic	-10249	NM_001109565	Hils1
chr5	108236652	108236839	-0.170785	10	1.575e-06	0.88986	Intergenic	Intergenic	-35581	NM_001107944	Klhl9
chr16	6566140	6566575	-0.22635	16	1.5783e-06	0.89172	intron (NM_001009271, intron 10 of 13)	-intron (NM_001009271, intron 10 of 13)	6739	NM_001009271	Nt5dc2
chr12	21994498	21994853	-0.313808	10	1.6246e-06	0.91792	intron (NM_001277394, intron 1 of 15)	-intron (NM_001277394, intron 1 of 15)	11005	NM_001277394	Srrm3
chr1	7341828	7341989	-0.301394	10	1.6585e-06	0.93706	intron (NM_013070, intron 51 of 74)	-intron (NM_013070, intron 51 of 74)	273071	NM_013070	Utrn
chr6	107812053	107812157	-0.214185	10	1.7319e-06	0.9785	Intergenic	Intergenic	70197	NM_133287	Numb
chr5	157704668	157704917	-0.160308	10	1.733e-06	0.97913	exon (NM_001106696, exon 5 of 5)	-exon (NM_001106696, exon 5 of 5)	4999	NM_001106696	Pla2g2e
chr8	4611474	4611591	-0.166911	12	1.7431e-06	0.98487	intron (NM_001014205, intron 1 of 3)	-intron (NM_001014205, intron 1 of 3)	7403	NM_001014205	Tmem123
chr1	120357960	120358361	-0.156018	10	0.0019753	1	intron (NM_012999, intron 5 of 18)	-intron (NM_012999, intron 5 of 18)	33318	NM_012999	Pcsk6
chr1	122953972	122954281	-0.262984	10	2.5951e-06	1	intron (NM_052807, intron 10 of 20)	-intron (NM_052807, intron 10 of 20)	249153	NM_052807	Igf1r
chr1	125256614	125256784	-0.190201	10	0.003194	1	Intergenic	Intergenic	30230	NM_080778	Nr2f2
chr1	13386757	13387093	-0.188705	10	0.00065679	1	Intergenic	Intergenic	-102725	NM_001037789	Ccdc28a
chr1	134601598	134601689	-0.185325	10	3.0459e-06	1	Intergenic	Intergenic	-5620	NR_031809	Mir7a-2
chr1	135895605	135895714	-0.162222	12	2.661e-05	1	promoter-TSS (NM_001014161)	-promoter-TSS (NM_001014161)	-287	NM_001014161	Idh2
chr1	137664699	137665116	-0.198412	15	1.8351e-05	1	intron (NM_001106276, intron 1 of 11)	-intron (NM_001106276, intron 1 of 11)	2021	NM_001106276	Cpeb1
chr1	137667186	137667351	-0.166916	10	0.00057686	1	promoter-TSS (NM_001106276)	-promoter-TSS (NM_001106276)	-340	NM_001106276	Cpeb1
chr1	15049476	15049673	-0.156494	10	0.0012669	1	Intergenic	Intergenic	40151	NM_001107522	Slc35d3
chr1	154096262	154096471	-0.246504	10	4.5743e-05	1	intron (NM_001191628, intron 17 of 31)	-intron (NM_001191628, intron 17 of 31)	-119767	NM_001034921	Nars2
chr1	154238253	154238399	-0.220003	10	2.394e-05	1	intron (NM_001034921, intron 4 of 11)	-intron (NM_001034921, intron 4 of 11)	22192	NM_001034921	Nars2
chr1	155760985	155761144	-0.15523	17	0.0027651	1	promoter-TSS (NM_001170434)	-promoter-TSS (NM_001170434)	-269	NM_001170434	Lrrc32
chr1	156763489	156763876	-0.150435	11	0.0020691	1	Intergenic	Intergenic	53087	NM_001009239	Rps3
chr1	185363686	185363791	-0.159382	10	7.4577e-05	1	exon (NM_147135, exon 4 of 4)	-exon (NM_147135, exon 4 of 4)	19472	NM_147135	Sbk1
chr1	185455492	185455945	-0.184614	10	2.1164e-05	1	promoter-TSS (NM_030853)	-promoter-TSS (NM_030853)	-539	NM_030853	Lat
chr1	190075698	190076163	-0.159284	10	0.0031189	1	intron (NM_001004418, intron 17 of 20)	-intron (NM_001004415, intron 18 of 21)	-17709	NM_001017464	Btbd16
chr1	194562167	194562383	-0.210291	10	0.00096337	1	intron (NM_001143803, intron 1 of 3)	-intron (NM_001143803, intron 1 of 3)	821	NM_001143803	Fam196a
chr1	195737545	195737857	-0.216868	10	0.0003619	1	Intergenic	Intergenic	-401231	NM_001271366	Mki67
chr1	199400803	199400901	-0.190786	10	0.00057442	1	Intergenic	Intergenic	-1951	NM_001107558	Nkx6-2
chr1	201110112	201110326	-0.272192	10	1.1664e-05	1	Intergenic	Intergenic	24460	NM_134375	Nlrp6
chr1	201173536	201173704	-0.173375	10	2.7917e-06	1	Intergenic	Intergenic	19126	NM_001106314	Ifitm1
chr1	201293785	201294064	-0.152425	10	0.024421	1	intron (NM_001024887, intron 1 of 9)	-intron (NM_001024887, intron 1 of 9)	3235	NM_001024887	Sigirr
chr1	202674089	202674375	-0.201971	10	0.00012649	1	Intergenic	Intergenic	-9696	NM_053325	Syt8
chr1	206159061	206159420	-0.2245	10	0.00060273	1	intron (NM_001106321, intron 5 of 22)	-intron (NM_001106321, intron 5 of 22)	47109	NM_001106321	Lrp5
chr1	209210548	209211187	-0.151243	15	0.00025751	1	promoter-TSS (NM_053846)	-promoter-TSS (NM_053846)	-872	NM_053846	Nrxn2
chr1	209339313	209339597	-0.195539	10	0.0022681	1	Intergenic	Intergenic	-11537	NM_001034943	Slc22a12
chr1	209730355	209730473	-0.161107	10	2.5359e-06	1	promoter-TSS (NM_139337)	-promoter-TSS (NM_139337)	-493	NM_139337	Macrod1
chr1	209869666	209869764	-0.237175	10	5.1563e-06	1	exon (NM_139337, exon 5 of 11)	-exon (NM_139337, exon 5 of 11)	9803	NM_001106332	Otub1
chr1	212441234	212441434	-0.181698	10	0.00038133	1	intron (NM_001011940, intron 3 of 11)	-intron (NM_001011940, intron 3 of 11)	8040	NM_001011940	Best1
chr1	212681962	212682132	-0.208443	13	3.5479e-06	1	intron (NM_053445, intron 7 of 11)	-intron (NM_053445, intron 7 of 11)	10439	NM_053430	Fen1
chr1	212771340	212771891	-0.272131	10	1.6276e-05	1	intron (NM_001005886, intron 1 of 19)	-intron (NM_001005886, intron 1 of 19)	18638	NM_001005886	Dagla
chr1	213210154	213210633	-0.235051	13	2.1462e-06	1	TTS (NM_001107463)	-TTS (NM_001107463)	23883	NM_019295	Cd5
chr1	213542007	213542475	-0.218179	18	2.7837e-05	1	Intergenic	Intergenic	16636	NR_102351	LOC100910973
chr1	228829319	228829838	-0.197221	10	0.0004462	1	intron (NM_001037197, intron 2 of 12)	-intron (NM_001037197, intron 2 of 12)	81458	NM_001037197	Kank1
chr1	240979521	240979863	-0.205184	11	1.7244e-05	1	Intergenic	Intergenic	17195	NM_001012072	Ppp1r3c
chr1	242122751	242123296	-0.273383	10	6.3097e-06	1	Intergenic	Intergenic	-114608	NM_019277	Exoc6
chr1	246914715	246915024	-0.18393	10	3.8345e-05	1	intron (NM_022953, intron 1 of 33)	-intron (NM_022953, intron 1 of 33)	49538	NM_022953	Slit1
chr1	247460477	247460615	-0.199699	12	0.0016797	1	intron (NM_001135762, intron 1 of 15)	-intron (NM_001135762, intron 1 of 15)	1607	NM_001135762	Hpse2
chr1	249417365	249417609	-0.162891	18	0.00037817	1	Intergenic	Intergenic	53973	NM_139192	Scd1
chr1	249806756	249806855	-0.186904	12	0.00018396	1	intron (NM_001106361, intron 1 of 10)	-intron (NM_001106361, intron 1 of 10)	2751	NM_001106361	Pax2
chr1	250189816	250190239	-0.211736	13	0.00058488	1	promoter-TSS (NM_001033064)	-promoter-TSS (NM_001033064)	87	NM_001033064	Kazald1
chr1	250193961	250194270	-0.17474	10	0.019957	1	TTS (NM_001033064)	-TTS (NM_001033064)	4175	NM_001033064	Kazald1
chr1	250263562	250263725	-0.167056	10	3.0231e-05	1	Intergenic	Intergenic	8301	NM_001109166	Tlx1
chr1	250393072	250394086	-0.154202	20	1.1367e-05	1	Intergenic	Intergenic	9323	NM_001047108	Lbx1
chr1	250463783	250464057	-0.159846	12	0.00018282	1	Intergenic	Intergenic	45183	NR_110710	LOC100911827
chr1	251530729	251530921	-0.17242	12	0.017276	1	exon (NM_134370, exon 13 of 18)	-exon (NM_134370, exon 13 of 18)	9266	NM_001008349	Nfkb2
chr1	251542354	251542498	-0.184997	10	0.0012817	1	intron (NM_134370, intron 1 of 17)	-intron (NM_134370, intron 1 of 17)	314	NM_134370	Psd
chr1	252029554	252029732	-0.222199	10	0.0025223	1	promoter-TSS (NM_080890)	-promoter-TSS (NM_080890)	5	NM_080890	As3mt
chr1	252586837	252586961	-0.187155	10	0.00027432	1	Intergenic	Intergenic	84235	NM_001107605	Neurl1
chr1	252783060	252783340	-0.18526	10	0.0020053	1	intron (NM_001107606, intron 1 of 13)	-intron (NM_001107606, intron 1 of 13)	13576	NM_001107606	Sh3pxd2a
chr1	252937255	252937444	-0.167919	12	8.6408e-05	1	Intergenic	Intergenic	-17164	NM_019349	Slk
chr1	259191401	259191752	-0.15228	10	0.00057518	1	Intergenic	Intergenic	-51896	NM_131913	Xpnpep1
chr1	265316982	265317389	-0.195434	10	9.6837e-05	1	intron (NM_001107445, intron 7 of 11)	-intron (NM_001107445, intron 7 of 11)	49577	NM_057206	Pnliprp2
chr1	266006712	266006826	-0.161623	10	1.6988e-05	1	intron (NM_001109169, intron 1 of 2)	-intron (NM_001109169, intron 1 of 2)	2512	NM_001109169	Emx2
chr1	41437248	41437508	-0.159997	10	0.00096536	1	Intergenic	Intergenic	-45732	NM_001309449	Tagap
chr1	41994646	41994875	-0.152687	12	0.00076194	1	Intergenic	Intergenic	72741	NM_001006995	Acat2
chr1	42060178	42060544	-0.15272	10	0.00045669	1	Intergenic	Intergenic	50861	NM_012670	Tcp1
chr1	42076711	42076907	-0.206802	12	5.3022e-05	1	Intergenic	Intergenic	34413	NM_012670	Tcp1
chr1	45168807	45168948	-0.212493	11	0.00024002	1	Intergenic	Intergenic	246720	NM_001115021	Qk
chr1	45362062	45362283	-0.185608	10	7.1805e-05	1	Intergenic	Intergenic	-228253	NM_001106208	Pabpc6
chr1	65887074	65887374	-0.206944	10	0.00017147	1	intron (NM_001109138, intron 1 of 3)	-intron (NM_001109138, intron 1 of 3)	419	NM_001109138	Smim17
chr1	77136220	77136380	-0.174164	15	0.00017712	1	exon (NM_001025678, exon 2 of 2)	-exon (NM_001025678, exon 2 of 2)	3185	NM_001025678	Fkrp
chr1	77277361	77277495	-0.167493	10	4.9215e-06	1	promoter-TSS (NM_001107481)	-promoter-TSS (NM_001107481)	86	NM_001107481	Pnmal2
chr1	78354807	78355059	-0.176152	10	0.0073826	1	exon (NM_001109139, exon 3 of 4)	-exon (NM_001109139, exon 3 of 4)	-3238	NM_001107483	Irf2bp1
chr1	78360780	78360987	-0.224902	10	0.00011011	1	TTS (NM_001107483)	-TTS (NM_001107483)	2713	NM_001107483	Irf2bp1
chr1	78692130	78692511	-0.198378	10	0.00032504	1	Intergenic	Intergenic	-18830	NM_001256509	Fosb
chr1	80600196	80600688	-0.181859	13	1.2568e-05	1	intron (NM_053628, intron 1 of 41)	-intron (NM_053628, intron 1 of 41)	8980	NM_053628	Megf8
chr1	82437569	82437691	-0.227048	10	0.00028847	1	exon (NM_001100845, exon 35 of 35)	-exon (NM_001100845, exon 35 of 35)	-1422	NM_001271080	Shkbp1
chr1	83190105	83190479	-0.188419	10	0.015767	1	exon (NM_001164657, exon 6 of 20)	-exon (NM_001164657, exon 6 of 20)	12881	NM_001164657	Fcgbp
chr1	83195645	83195956	-0.197486	10	0.0014998	1	exon (NM_001164657, exon 8 of 20)	-exon (NM_001164657, exon 8 of 20)	18390	NM_001164657	Fcgbp
chr1	83989100	83989242	-0.151237	10	0.00013022	1	exon (NM_001110808, exon 1 of 21)	-exon (NM_001110808, exon 1 of 21)	171	NM_001110808	Capn12
chr1	84353341	84353476	-0.177179	13	1.9709e-06	1	promoter-TSS (NM_001170340)	-promoter-TSS (NM_001170340)	-76	NM_001170340	Catsperg1
chr1	84885925	84886342	-0.158409	10	0.00023741	1	Intergenic	Intergenic	92072	NM_001271339	Zfp74
chr1	85374891	85375020	-0.242312	10	3.4451e-06	1	intron (NM_001098240, intron 5 of 9)	-intron (NM_001098240, intron 5 of 9)	-3573	NM_001005900	Hcst
chr1	85487654	85487925	-0.154993	10	0.00039082	1	exon (NM_001289820, exon 3 of 4)	-exon (NM_001289820, exon 3 of 4)	2341	NM_001289820	Ovol3
chr1	85488927	85489145	-0.166785	10	0.00079044	1	TTS (NM_001106244)	-TTS (NM_001106244)	1490	NM_001106244	Polr2i
chr1	94212031	94212208	-0.163608	10	0.0012751	1	exon (NM_001004100, exon 2 of 5)	-exon (NM_001004100, exon 2 of 5)	1196	NM_001004100	Klk10
chr1	94787345	94787454	-0.217044	10	5.1719e-06	1	exon (NM_001012459, exon 3 of 4)	-exon (NM_001012459, exon 3 of 4)	920	NM_001012459	Clec11a
chr1	94832829	94833213	-0.153774	10	4.747e-05	1	exon (NM_031751, exon 24 of 25)	-exon (NM_031751, exon 24 of 25)	22435	NM_001106255	RGD1309036
chr1	96108610	96108907	-0.178258	12	0.00016855	1	TTS (NM_001106261)	-TTS (NM_001106261)	11091	NM_001106261	Rasip1
chr1	96227427	96227656	-0.166025	14	4.9402e-06	1	intron (NM_001039665, intron 1 of 6)	-intron (NM_001039665, intron 1 of 6)	-33613	NM_001109623	Spaca4
chr1	99441150	99441265	-0.221454	10	0.0001411	1	intron (NM_001009644, intron 1 of 3)	-intron (NM_001009644, intron 1 of 3)	411	NM_001009644	Dbx1
chr1	99445629	99446179	-0.234246	10	6.0032e-06	1	Intergenic	Intergenic	-4285	NM_001009644	Dbx1
chr10	102482661	102483045	-0.200575	10	0.0045465	1	Intergenic	Intergenic	89344	NM_080403_1	Sox9
chr10	102798039	102798343	-0.206424	10	0.004364	1	Intergenic	Intergenic	3159	NR_031941	Mir297
chr10	103116536	103116719	-0.163152	10	9.3684e-05	1	intron (NM_001013042, intron 4 of 9)	-intron (NM_001013042, intron 4 of 9)	72453	NM_001013042	Slc39a11
chr10	104268986	104269348	-0.165912	10	0.0022311	1	Intergenic	Intergenic	-276477	NM_001077592	Rpl38
chr10	10503017	10503497	-0.165513	10	0.001405	1	exon (NM_001108265, exon 10 of 10)	-exon (NM_001108265, exon 10 of 10)	8013	NM_001108265	Nagpa
chr10	105305084	105305774	-0.20518	14	0.00017081	1	intron (NM_001191655, intron 9 of 9)	-intron (NM_001191655, intron 9 of 9)	35547	NM_012575	Grin2c
chr10	106724034	106724353	-0.153043	13	0.00015104	1	exon (NM_001107067, exon 3 of 19)	-exon (NM_001107067, exon 3 of 19)	14823	NM_012818	Aanat
chr10	107234903	107235231	-0.169688	10	0.00092185	1	intron (NM_001108309, intron 2 of 16)	-intron (NM_001108309, intron 2 of 16)	14333	NM_001108309	Sec14l1
chr10	10831174	10831316	-0.183341	10	0.00016767	1	Intergenic	Intergenic	17904	NM_001007668	Ubald1
chr10	108614977	108615130	-0.209471	10	2.278e-05	1	Intergenic	Intergenic	-98047	NM_001134498	Rbfox3
chr10	109650199	109650705	-0.278638	10	7.1191e-06	1	Intergenic	Intergenic	125882	NM_001127449	Actg1
chr10	110019427	110019713	-0.158586	10	0.00016728	1	TTS (NM_022386)	-TTS (NM_022386)	-3224	NM_001107073	Sirt7
chr10	11200249	11200515	-0.153922	12	1.8493e-06	1	Intergenic	Intergenic	56325	NM_001108267	Tfap4
chr10	13109363	13109541	-0.174996	10	0.0037684	1	exon (NM_001135087, exon 4 of 7)	-exon (NM_001135087, exon 4 of 7)	647	NM_001135087	Prss41
chr10	13393021	13393470	-0.220729	10	5.7327e-06	1	intron (NM_031081, intron 1 of 13)	-intron (NM_031081, intron 1 of 13)	834	NM_031081	Pdpk1
chr10	13758950	13759123	-0.157454	10	4.06e-05	1	exon (NM_080690, exon 20 of 20)	-exon (NM_080690, exon 20 of 20)	18444	NM_080690	Caskin1
chr10	16562932	16563254	-0.150087	10	0.0038148	1	Intergenic	Intergenic	-43090	NM_053651	Nkx2-5
chr10	17189583	17189952	-0.19279	10	0.00036603	1	Intergenic	Intergenic	-141520	NM_001142652	Neurl1b
chr10	29733143	29733274	-0.166173	10	0.00045329	1	Intergenic	Intergenic	-36580	NM_053820	Ebf1
chr10	31299994	31300181	-0.18265	11	0.0002233	1	intron (NM_001106995, intron 1 of 5)	-intron (NM_001106995, intron 1 of 5)	209	NM_001106995	Nipal4
chr10	38930879	38931003	-0.206103	15	1.9197e-06	1	Intergenic	Intergenic	31816	NM_021672	Gdf9
chr10	42613572	42613894	-0.237109	10	0.00057416	1	Intergenic	Intergenic	-492580	NM_001007609	Mfap3
chr10	43423143	43423334	-0.16786	10	0.0061151	1	TTS (NM_021592)	-TTS (NM_021592)	2694	NM_021592	Hand1
chr10	43426874	43427047	-0.178683	10	2.2135e-05	1	Intergenic	Intergenic	-1028	NM_021592	Hand1
chr10	45203966	45204160	-0.201068	10	3.0403e-05	1	Intergenic	Intergenic	-11901	NM_001107004	Zfp39
chr10	45287342	45287550	-0.168413	10	0.0015589	1	Intergenic	Intergenic	16863	NM_001108276	Trim11
chr10	4814810	4814979	-0.1524	10	3.1112e-06	1	TTS (NM_012873)	-TTS (NM_012873)	128	NM_001002855	Prm3
chr10	51588596	51588731	-0.179505	10	2.5874e-05	1	promoter-TSS (NM_182667)	-promoter-TSS (NM_182667)	-438	NM_182667	Myocd
chr10	55880188	55880516	-0.203155	10	0.011116	1	intron (NM_001105792, intron 1 of 3)	-intron (NM_001105792, intron 1 of 3)	461	NM_001105792	Hes7
chr10	55885436	55885744	-0.203849	11	0.00019739	1	promoter-TSS (NM_001105793)	-promoter-TSS (NM_001105793)	17	NM_001105793	Aloxe3
chr10	56134088	56134263	-0.193919	10	0.00093789	1	TTS (NM_001126292)	-TTS (NM_001126292)	752	NM_001126292	RGD1563441
chr10	64016273	64016509	-0.230407	14	4.3284e-06	1	exon (NM_001105754, exon 9 of 17)	-exon (NM_001105754, exon 9 of 17)	-8140	NM_001013117	Phf12
chr10	65848755	65849279	-0.183904	10	0.00036873	1	intron (NM_001107023, intron 3 of 14)	-intron (NM_001107023, intron 3 of 14)	-52031	NR_031909	Mir193
chr10	65914752	65915124	-0.16891	10	0.013769	1	promoter-TSS (NR_031952)	-promoter-TSS (NR_031952)	-10	NR_031952	Mir365
chr10	70823404	70823463	-0.176712	10	7.1759e-05	1	Intergenic	Intergenic	160277	NM_001014228	Cct6b
chr10	72080141	72080335	-0.203245	13	0.00039116	1	promoter-TSS (NM_001308148)	-promoter-TSS (NM_001308148)	-732	NM_001308148	Hnf1b
chr10	72800256	72800446	-0.181704	10	0.00012757	1	TTS (NM_145880)	-TTS (NM_145880)	5448	NM_145880	Lhx1
chr10	72921042	72921304	-0.161561	10	4.0885e-05	1	Intergenic	Intergenic	-115374	NM_145880	Lhx1
chr10	74083832	74083901	-0.162265	10	6.9015e-06	1	Intergenic	Intergenic	-1336	NM_001107033	Tbx2
chr10	74126480	74126682	-0.159822	10	1.5633e-05	1	Intergenic	Intergenic	-9835	NM_001107034	Tbx4
chr10	74293099	74293305	-0.167512	10	0.00020947	1	Intergenic	Intergenic	156786	NM_001107034	Tbx4
chr10	76051735	76052201	-0.185309	10	0.00019119	1	Intergenic	Intergenic	2688	NR_031888	Mir142
chr10	76316830	76317079	-0.243285	10	2.079e-05	1	Intergenic	Intergenic	-23709	NM_001109552	Srsf1
chr10	76317652	76318168	-0.15791	12	2.8172e-05	1	Intergenic	Intergenic	-22754	NM_001109552	Srsf1
chr10	82796176	82796730	-0.20209	10	0.00044788	1	Intergenic	Intergenic	-55952	NM_133317	Tob1
chr10	82882002	82882375	-0.179306	12	3.0837e-05	1	Intergenic	Intergenic	29784	NM_133317	Tob1
chr10	83030843	83031290	-0.192151	10	0.00069189	1	promoter-TSS (NM_080581)	-promoter-TSS (NM_080581)	-268	NM_080581	Abcc3
chr10	83799972	83800138	-0.206393	10	0.0011572	1	Intergenic	Intergenic	-2114	NM_001105832	Dlx3
chr10	83873896	83874083	-0.194776	10	9.0201e-06	1	Intergenic	Intergenic	-45780	NM_001107040	Dlx4
chr10	84671010	84671228	-0.169576	10	0.0030381	1	TTS (NM_175594)	-TTS (NM_175594)	43529	NM_175594	Igf2bp1
chr10	85008124	85008334	-0.158879	14	7.6441e-05	1	Intergenic	Intergenic	-5482	NM_001191649	Hoxb8
chr10	85099311	85099938	-0.166464	16	2.5023e-05	1	Intergenic	Intergenic	23097	NM_001107042	Hoxb3
chr10	85149532	85149814	-0.186781	11	0.00015586	1	Intergenic	Intergenic	-44131	NM_173311	Skap1
chr10	85392070	85392530	-0.160511	10	0.0015211	1	intron (NM_173311, intron 4 of 12)	-intron (NM_173311, intron 4 of 12)	134595	NM_001199169	Snx11
chr10	86156679	86156863	-0.195786	10	1.0097e-05	1	Intergenic	Intergenic	110230	NM_001105834	Mrpl45
chr10	86190341	86191286	-0.191423	17	3.217e-05	1	Intergenic	Intergenic	129860	NM_019378	Srcin1
chr10	87122597	87123123	-0.198677	10	0.006157	1	intron (NM_138521, intron 1 of 6)	-intron (NM_138521, intron 1 of 6)	971	NM_138521	Ppp1r1b
chr10	87539978	87540434	-0.168061	10	0.00088932	1	intron (NM_031134, intron 8 of 8)	-intron (NM_031134, intron 8 of 8)	5895	NM_145775	Nr1d1
chr10	90185059	90185177	-0.162659	17	9.6597e-05	1	exon (NM_001037202, exon 11 of 13)	-exon (NM_001037202, exon 11 of 13)	6987	NM_001037202	Plekhh3
chr10	91065736	91066045	-0.153491	13	0.0017509	1	intron (NM_053668, intron 15 of 18)	-intron (NM_053668, intron 15 of 18)	20346	NM_053668	Mpp3
chr10	91544172	91544301	-0.170651	10	0.0085111	1	Intergenic	Intergenic	8102	NM_017113	Grn
chr10	91891975	91892208	-0.166468	15	6.7476e-05	1	intron (NM_001108300, intron 10 of 24)	-intron (NM_001108300, intron 10 of 24)	10918	NM_001108300	Adam11
chr10	96323742	96324111	-0.213128	10	2.3152e-06	1	Intergenic	Intergenic	30449	NM_053483	Kpna2
chr10	96366699	96366954	-0.225418	10	0.00019351	1	Intergenic	Intergenic	-12451	NM_001270802	Kpna2
chr10	96838321	96838630	-0.182942	12	4.9603e-05	1	Intergenic	Intergenic	42170	NM_001047898	RGD1359290
chr10	98756602	98756871	-0.156267	10	0.0046057	1	intron (NM_001047877, intron 10 of 10)	-intron (NM_001047877, intron 10 of 10)	34471	NM_001127297	Wipi1
chr11	30198851	30199055	-0.250468	10	6.227e-06	1	intron (NM_001100558, intron 11 of 24)	-intron (NM_001100558, intron 11 of 24)	75201	NM_001100558	Tiam1
chr11	30220589	30221011	-0.18699	10	0.0012537	1	intron (NM_001100558, intron 13 of 24)	-intron (NM_001100558, intron 13 of 24)	97048	NM_001100558	Tiam1
chr11	30720555	30720889	-0.206332	12	4.2842e-06	1	promoter-TSS (NM_001135834)	-promoter-TSS (NM_001135834)	-61	NM_001135834	Mrap
chr11	32324198	32324472	-0.154117	10	1.637e-05	1	Intergenic	Intergenic	-11027	NM_001017483	LOC498063
chr11	34550815	34550921	-0.156401	10	9.3111e-06	1	Intergenic	Intergenic	-24215	NM_001105892	Ripply3
chr11	35877164	35877506	-0.256258	10	2.1501e-05	1	Intergenic	Intergenic	-117280	NM_133397	Erg
chr11	35966706	35966870	-0.155835	12	0.0031341	1	Intergenic	Intergenic	-47259	NM_001107107	Ets2
chr11	58454733	58454861	-0.188088	10	0.0019484	1	intron (NM_017140, intron 3 of 6)	-intron (NM_017140, intron 3 of 6)	65792	NM_017140	Drd3
chr11	58819541	58820162	-0.150474	10	0.035346	1	intron (NM_001105880, intron 7 of 12)	-intron (NM_001105880, intron 7 of 12)	-175818	NR_032745	Mir568
chr11	64151207	64151288	-0.179883	11	0.00054805	1	Intergenic	Intergenic	19034	NM_199113	Popdc2
chr11	65951123	65951373	-0.15279	10	0.0001017	1	Intergenic	Intergenic	-24727	NM_001127536	Ildr1
chr11	70529668	70529826	-0.169386	17	4.3226e-06	1	promoter-TSS (NM_053306)	-promoter-TSS (NM_053306)	-235	NM_053306	Pak2
chr11	78185879	78186135	-0.222609	12	3.3471e-06	1	intron (NM_001013864, intron 5 of 10)	-intron (NM_001013864, intron 5 of 10)	230865	NM_001013864	Lpp
chr11	82408974	82409128	-0.270989	10	1.952e-06	1	intron (NM_057134, intron 4 of 22)	-intron (NM_057134, intron 4 of 22)	1350	NM_057134	Chrd
chr11	84405138	84405364	-0.178573	15	7.0729e-05	1	intron (NM_001108322, intron 3 of 8)	-intron (NM_001108322, intron 3 of 8)	4271	NM_001108322	Tbx1
chr11	84753885	84754237	-0.156141	10	0.00088014	1	intron (NM_001039021, intron 1 of 11)	-intron (NM_001039021, intron 1 of 11)	5122	NM_001039021	Zdhhc8
chr12	10712469	10712562	-0.167492	10	1.7746e-05	1	Intergenic	Intergenic	-6579	NM_001037191	Tecpr1
chr12	15706761	15707163	-0.17392	10	6.3986e-06	1	intron (NM_001025033, intron 2 of 4)	-intron (NM_001025033, intron 2 of 4)	12931	NM_133573	Gper1
chr12	15793738	15793881	-0.185201	10	4.655e-06	1	Intergenic	Intergenic	-10505	NM_001107126	Cox19
chr12	16151951	16152222	-0.174519	10	1.8347e-05	1	exon (NM_012801, exon 2 of 7)	-exon (NM_012801, exon 2 of 7)	1042	NM_012801	Pdgfa
chr12	16333747	16333932	-0.153289	10	1.878e-05	1	Intergenic	Intergenic	-40413	NM_001047924	LOC498155
chr12	19807949	19808254	-0.157472	10	0.00021538	1	intron (NM_001107132, intron 1 of 6)	-intron (NM_001107132, intron 1 of 6)	1058	NM_001107132	Nyap1
chr12	27966886	27967180	-0.231436	10	3.8864e-05	1	intron (NM_001017486, intron 10 of 10)	-intron (NM_001017486, intron 10 of 10)	17285	NM_001009679	Psph
chr12	32526898	32527132	-0.25427	10	0.00014787	1	Intergenic	Intergenic	-35778	NM_001108334	Ncor2
chr12	32615855	32616353	-0.198201	10	0.0016608	1	intron (NM_001108334, intron 1 of 46)	-intron (NM_001108334, intron 1 of 46)	53311	NM_001108334	Ncor2
chr12	33021717	33021864	-0.151014	14	5.1142e-06	1	Intergenic	Intergenic	70630	NM_053775	Atp6v0a2
chr12	34582825	34582980	-0.151795	10	0.00044287	1	Intergenic	Intergenic	34583	NM_017233	Hpd
chr12	37585454	37585608	-0.173144	10	0.00096893	1	Intergenic	Intergenic	-253274	NM_139036	Lhx5
chr12	3772403	3772554	-0.211639	10	4.2235e-05	1	promoter-TSS (NM_031336)	-promoter-TSS (NM_031336)	-108	NM_031336	Kl
chr12	38899806	38900061	-0.151492	10	7.3678e-05	1	Intergenic	Intergenic	561781	NM_001109066	RGD1562310
chr12	39340092	39340275	-0.167738	10	3.7964e-05	1	Intergenic	Intergenic	121531	NM_001109066	RGD1562310
chr12	39368381	39368517	-0.185201	10	0.00028742	1	Intergenic	Intergenic	93266	NM_001109066	RGD1562310
chr12	39412630	39412948	-0.163176	10	0.011071	1	Intergenic	Intergenic	48926	NM_001109066	RGD1562310
chr12	39714626	39714908	-0.176941	10	0.00035147	1	Intergenic	Intergenic	39125	NM_001108338	Fbxo21
chr12	40276976	40277274	-0.193063	10	6.0715e-06	1	Intergenic	Intergenic	-118817	NM_001107146	Rfc5
chr12	40294789	40295026	-0.221387	10	2.405e-05	1	Intergenic	Intergenic	-101034	NM_001107146	Rfc5
chr12	42339368	42339677	-0.209705	10	0.00078332	1	intron (NM_001012147, intron 1 of 9)	-intron (NM_001012147, intron 1 of 9)	-20491	NM_022402	Rplp0
chr12	43098457	43098762	-0.23706	10	9.1671e-06	1	intron (NM_001012148, intron 6 of 14)	-intron (NM_001012148, intron 6 of 14)	17267	NM_001012148	Ankrd13a
chr12	43100242	43100398	-0.202842	10	5.0407e-05	1	intron (NM_001012148, intron 5 of 14)	-intron (NM_001012148, intron 5 of 14)	15557	NM_001012148	Ankrd13a
chr12	43180462	43180631	-0.181554	10	3.9421e-05	1	exon (NM_001191666, exon 1 of 12)	-exon (NM_001191666, exon 1 of 12)	145	NM_001191666	Tchp
chr12	43308860	43309270	-0.172468	13	8.8141e-06	1	Intergenic	Intergenic	-13771	NM_001109067	Fam222a
chr12	43717241	43717536	-0.151178	10	0.0012381	1	Intergenic	Intergenic	-29799	NM_001109327	Coro1c
chr12	45198536	45198921	-0.171091	10	0.00031155	1	Intergenic	Intergenic	156386	NM_001191928	Mn1
chr12	45208873	45209100	-0.233087	10	9.3651e-05	1	Intergenic	Intergenic	146128	NM_001191928	Mn1
chr12	46025653	46025850	-0.202865	10	0.0011431	1	exon (NM_001025563, exon 2 of 6)	-exon (NM_001025563, exon 2 of 6)	774	NM_001025563	Pus1
chr12	8508791	8509075	-0.194291	10	1.6454e-05	1	Intergenic	Intergenic	-42217	NM_001191663	Gsx1
chr12	9819027	9819565	-0.153377	10	0.0040245	1	intron (NM_031146, intron 7 of 7)	-intron (NM_031146, intron 7 of 7)	-15657	NM_019289	Arpc1b
chr13	100675215	100675374	-0.215503	10	0.0004792	1	Intergenic	Intergenic	16363	NM_001077674	Hlx
chr13	103734165	103734477	-0.158504	12	0.00029078	1	Intergenic	Intergenic	-60340	NM_203336	Esrrg
chr13	26057701	26057860	-0.16835	10	9.7614e-05	1	Intergenic	Intergenic	-2651889	NM_001047865	Cntnap5a
chr13	31699551	31699847	-0.251993	10	1.3972e-05	1	Intergenic	Intergenic	-92435	NM_001107169	Gli2
chr13	41309827	41310496	-0.200368	14	2.9585e-06	1	intron (NM_022205, intron 1 of 1)	-intron (NM_022205, intron 1 of 1)	2028	NM_022205	Cxcr4
chr13	44145115	44145360	-0.187625	14	0.00032831	1	intron (NM_019365, intron 2 of 6)	-intron (NM_019365, intron 2 of 6)	43255	NM_019365	Rassf5
chr13	47029079	47029251	-0.174357	10	0.001525	1	exon (NM_017259, exon 2 of 3)	-exon (NM_017259, exon 2 of 3)	1580	NM_017259	Btg2
chr13	47697709	47697871	-0.223876	10	0.0049497	1	exon (NM_012665, exon 8 of 8)	-exon (NM_012665, exon 8 of 8)	7272	NM_012665	Syt2
chr13	49917825	49917924	-0.182425	12	0.0011489	1	Intergenic	Intergenic	130881	NM_021742	Nr5a2
chr13	52149137	52149362	-0.222965	15	1.4298e-05	1	intron (NM_181367, intron 5 of 6)	-intron (NM_181367, intron 5 of 6)	11672	NM_181367	Lhx9
chr13	66724797	66725263	-0.153367	10	0.012364	1	Intergenic	Intergenic	71099	NM_001191671	Edem3
chr13	69852112	69852323	-0.219146	10	3.8057e-06	1	Intergenic	Intergenic	-168275	NM_019294	Cacna1e
chr13	72329034	72329435	-0.208957	10	0.0025643	1	Intergenic	Intergenic	204967	NM_001107188	Rasal2
chr13	86300552	86300973	-0.159983	10	0.00032444	1	intron (NM_138922, intron 2 of 9)	-intron (NM_138922, intron 2 of 9)	132052	NM_138922	Nos1ap
chr13	86891820	86892043	-0.154286	10	0.0016304	1	Intergenic	Intergenic	19811	NM_053843	Fcgr2a
chr13	90434497	90434814	-0.158467	10	0.0016575	1	Intergenic	Intergenic	187647	NM_001105974	Grem2
chr14	101216210	101216379	-0.25254	10	0.00027596	1	Intergenic	Intergenic	-62505	NM_198763	Slc1a4
chr14	101435960	101436287	-0.165245	10	0.0017882	1	intron (NM_001024903, intron 1 of 1)	-intron (NM_001024903, intron 1 of 1)	63311	NM_001024903	Sertad2
chr14	102722684	102722973	-0.165115	10	1.1497e-05	1	intron (NM_013109, intron 2 of 3)	-intron (NM_013109, intron 2 of 3)	1919	NM_013109	Otx1
chr14	102727457	102727574	-0.239989	12	1.0346e-05	1	Intergenic	Intergenic	-2768	NM_013109	Otx1
chr14	16347385	16347945	-0.185478	10	0.0017329	1	Intergenic	Intergenic	-1037	NM_001105725	Ccng2
chr14	2849262	2849792	-0.196993	11	0.011307	1	Intergenic	Intergenic	-20015	NM_001109563	LOC689986
chr14	33591840	33592121	-0.224807	10	0.015892	1	Intergenic	Intergenic	-82592	NM_080910	Paics
chr14	34181730	34182013	-0.163373	10	0.0039152	1	Intergenic	Intergenic	-36600	NM_001289832	Clock
chr14	35012318	35012527	-0.191835	10	0.00060093	1	Intergenic	Intergenic	-27604	NM_022264	Kit
chr14	35499486	35499638	-0.19828	11	0.0011035	1	Intergenic	Intergenic	-8397	NM_001137563	Gsx2
chr14	43552343	43552657	-0.223392	10	4.2278e-05	1	Intergenic	Intergenic	-35554	NM_021671	Tmem33
chr14	43674309	43674495	-0.198326	12	2.3857e-05	1	Intergenic	Intergenic	-157456	NM_021671	Tmem33
chr14	44590796	44591071	-0.172683	10	0.00037148	1	Intergenic	Intergenic	-8004	NM_001017452	Nsun7
chr14	46067970	46068240	-0.150728	10	0.00037263	1	Intergenic	Intergenic	-21260	NM_207604	Tlr6
chr14	49807258	49807337	-0.151515	10	0.016823	1	Intergenic	Intergenic	-802003	NM_001107216	Arap2
chr14	67888722	67888829	-0.198184	11	5.2962e-05	1	intron (NM_022632, intron 1 of 36)	-intron (NM_022632, intron 1 of 36)	3064	NM_022632	Slit2
chr14	78255194	78255655	-0.161399	10	7.5148e-06	1	Intergenic	Intergenic	-1920	NM_031059	Msx1
chr14	79499973	79500242	-0.169354	12	0.004817	1	intron (NM_057116, intron 1 of 9)	-intron (NM_057116, intron 1 of 9)	15806	NM_057116	Ppp2r2c
chr14	82887778	82888270	-0.175237	11	0.00012896	1	Intergenic	Intergenic	87439	NM_138533	Spon2
chr14	85725138	85725486	-0.169303	18	2.7964e-05	1	exon (NM_001108365, exon 3 of 7)	-exon (NM_001108365, exon 3 of 7)	1056	NM_001108365	Gas2l1
chr14	9220410	9220542	-0.177476	12	1.4052e-05	1	exon (NM_031737, exon 3 of 3)	-exon (NM_031737, exon 3 of 3)	5733	NM_031737	Nkx6-1
chr14	99683487	99683637	-0.195724	10	0.00071037	1	Intergenic	Intergenic	148711	NM_001134702	Meis1
chr15	18939497	18939908	-0.163889	10	0.049026	1	Intergenic	Intergenic	30340	NM_053907	Dnase1l3
chr15	21911434	21912186	-0.182935	13	0.00011598	1	Intergenic	Intergenic	-342514	NM_001033066	Ddhd1
chr15	2357464	2357738	-0.154442	10	0.0015616	1	TTS (NM_001107250)	-TTS (NM_001107250)	4690	NM_001107250	Zfp503
chr15	3193	3367	-0.151388	15	2.7301e-05	1	Intergenic	Intergenic	-319009	NM_031828	Kcnma1
chr15	32709943	32710213	-0.156113	10	3.0444e-06	1	Intergenic	Intergenic	12445	NM_001106032	Psmb11
chr15	33038279	33038781	-0.211142	10	1.2115e-05	1	promoter-TSS (NM_001106034)	-promoter-TSS (NM_001106034)	-482	NM_001106034	Cmtm5
chr15	37312000	37312437	-0.184306	12	0.001097	1	Intergenic	Intergenic	197151	NM_012952	Fgf9
chr15	39777501	39778005	-0.209159	10	4.2045e-05	1	intron (NM_001191686, intron 1 of 12)	-intron (NM_001191686, intron 1 of 12)	55284	NM_001191686	Spata13
chr15	42771017	42771643	-0.159823	10	0.024802	1	intron (NM_001106044, intron 1 of 8)	-intron (NM_001106044, intron 1 of 8)	519	NM_001106044	Tdh
chr15	43721342	43722048	-0.218133	13	2.366e-06	1	intron (NM_053307, intron 1 of 4)	-intron (NM_053307, intron 1 of 4)	34588	NM_053307	Msra
chr15	44409099	44409466	-0.164177	10	0.012876	1	intron (NM_020097, intron 2 of 4)	-intron (NM_020097, intron 2 of 4)	15301	NM_020097	Extl3
chr15	44489990	44490247	-0.156844	10	4.6645e-05	1	Intergenic	Intergenic	-65535	NM_020097	Extl3
chr15	44794221	44794658	-0.245059	10	7.8163e-06	1	Intergenic	Intergenic	-11860	NM_001107271	Zfp395
chr15	44795209	44795592	-0.155081	10	0.0047494	1	Intergenic	Intergenic	-10899	NM_001107271	Zfp395
chr15	51020088	51020416	-0.240052	10	9.6091e-05	1	exon (NM_001108385, exon 4 of 15)	-exon (NM_001108385, exon 4 of 15)	11866	NM_001108385	Dmtn
chr15	56288505	56288796	-0.151694	10	0.0036015	1	Intergenic	Intergenic	-32021	NM_001191118	Siah3
chr15	8380965	8381684	-0.163351	10	0.0039983	1	Intergenic	Intergenic	-173538	NM_001108371	Ube2e2
chr15	8670228	8670600	-0.182426	10	0.0025817	1	intron (NM_001108371, intron 1 of 3)	-intron (NM_001108371, intron 1 of 3)	115551	NM_001108371	Ube2e2
chr16	13100711	13101249	-0.198477	10	7.1176e-05	1	Intergenic	Intergenic	155984	NM_001107299	Rgr
chr16	17569627	17569793	-0.150573	10	0.00034719	1	Intergenic	Intergenic	-1175	NM_001270647	Sftpa1
chr16	18025162	18025362	-0.276739	10	8.6239e-06	1	promoter-TSS (NM_001044239)	-promoter-TSS (NM_001044239)	-498	NM_001044239	Ap1m1
chr16	18533538	18533721	-0.163549	10	0.00098467	1	exon (NM_001106065, exon 2 of 4)	-exon (NM_001106065, exon 2 of 4)	1153	NM_001106065	Ocel1
chr16	19045155	19045344	-0.194715	10	5.9605e-05	1	promoter-TSS (NM_052983)	-promoter-TSS (NM_052983)	-950	NM_052983	Slc5a5
chr16	19110518	19110734	-0.261366	10	3.8754e-06	1	intron (NM_001107303, intron 5 of 7)	-intron (NM_001107303, intron 5 of 7)	2282	NM_001107303	Arrdc2
chr16	19203182	19203570	-0.155205	15	0.00014362	1	intron (NM_001276765, intron 2 of 15)	-intron (NM_001276765, intron 2 of 15)	-9502	NM_013018	Rab3a
chr16	19333213	19333347	-0.215241	10	1.3268e-05	1	promoter-TSS (NM_001014236)	-promoter-TSS (NM_001014236)	-936	NM_001014236	Ssbp4
chr16	19631235	19631315	-0.18155	10	0.0032255	1	Intergenic	Intergenic	-6360	NM_053310	Homer3
chr16	20036948	20037149	-0.18284	14	0.00013643	1	Intergenic	Intergenic	12060	NM_001107307	Cilp2
chr16	26698281	26698357	-0.18326	10	2.7875e-06	1	promoter-TSS (NM_080886)	-promoter-TSS (NM_080886)	-5	NM_080886	Msmo1
chr16	27641393	27642132	-0.176393	11	0.00025728	1	Intergenic	Intergenic	-791343	NM_001106081	Tll1
chr16	27805428	27806184	-0.163103	10	7.3293e-05	1	Intergenic	Intergenic	-627300	NM_001106081	Tll1
chr16	60109978	60110125	-0.154756	10	5.1529e-05	1	exon (NM_001033062, exon 1 of 1)	-exon (NM_001033062, exon 1 of 1)	891	NM_001033062	Cldn23
chr16	6655450	6655753	-0.216349	10	5.0756e-06	1	intron (NM_001100882, intron 7 of 15)	-intron (NM_001100882, intron 7 of 15)	4236	NM_001100882	Sema3g
chr16	6948208	6948482	-0.162109	10	0.00015836	1	exon (NM_001107293, exon 5 of 6)	-exon (NM_001107293, exon 5 of 6)	-8783	NM_001007623	Mettl6
chr16	6951068	6951178	-0.16092	13	0.0006382	1	exon (NM_001107293, exon 6 of 6)	-exon (NM_001107293, exon 6 of 6)	-11561	NM_001007623	Mettl6
chr16	71083696	71083917	-0.248895	10	1.2518e-05	1	Intergenic	Intergenic	-157950	NM_001004107	Tacc1
chr16	7146342	7146568	-0.150766	10	0.00095622	1	Intergenic	Intergenic	35104	NM_001012047	Btd
chr16	72449194	72449317	-0.171882	10	0.00013168	1	intron (NM_001134747, intron 5 of 5)	-intron (NM_001134747, intron 5 of 5)	359468	NM_001134747	Zmat4
chr16	80622582	80622705	-0.163714	10	7.4516e-05	1	intron (NM_001012159, intron 2 of 8)	-intron (NM_001012159, intron 2 of 8)	896	NM_001012159	Upf3a
chr16	80770473	80770773	-0.184566	11	0.00032272	1	intron (NM_031574, intron 2 of 23)	-intron (NM_031574, intron 2 of 23)	-59711	NM_001037182	LOC290876
chr16	81189551	81189662	-0.153474	10	4.3045e-05	1	promoter-TSS (NM_001031813)	-promoter-TSS (NM_001031813)	-716	NM_001170477	Grtp1
chr16	82004506	82004736	-0.16348	14	8.5967e-06	1	Intergenic	Intergenic	295580	NM_001107323	Tubgcp3
chr16	82020234	82020533	-0.160964	10	0.00036132	1	Intergenic	Intergenic	311343	NM_001107323	Tubgcp3
chr16	82834076	82834251	-0.186548	10	1.1684e-05	1	intron (NM_001177684, intron 8 of 13)	-intron (NM_001177684, intron 8 of 13)	22507	NM_001108402	Carkd
chr16	83187050	83187183	-0.150774	12	0.0074476	1	Intergenic	Intergenic	141934	NM_001135009	Col4a1
chr16	83202369	83202555	-0.162888	10	5.6089e-05	1	Intergenic	Intergenic	157279	NM_001135009	Col4a1
chr16	83382292	83382621	-0.150747	10	0.0001271	1	exon (NM_001168633, exon 1 of 2)	-exon (NM_001168633, exon 1 of 2)	2470	NM_001168633	Irs2
chr16	84855030	84855273	-0.194041	11	1.2572e-05	1	intron (NM_001109112, intron 2 of 4)	-intron (NM_001109112, intron 2 of 4)	951	NM_001109112	Tnfsf13b
chr16	84974779	84974882	-0.171965	10	2.3898e-05	1	Intergenic	Intergenic	92951	NM_001106095	Lig4
chr16	8866853	8867008	-0.151473	10	0.001632	1	intron (NM_001107297, intron 1 of 5)	-intron (NM_001107297, intron 1 of 5)	3394	NM_001107297	Arhgap22
chr17	14393583	14394209	-0.164743	10	0.0040446	1	Intergenic	Intergenic	-15546	NM_001025029	Tifab
chr17	14827464	14827737	-0.157382	10	0.0045215	1	Intergenic	Intergenic	-6543	NM_053624	Pitx1
chr17	15802919	15803384	-0.198782	12	5.6343e-06	1	Intergenic	Intergenic	-78245	NM_022206	Unc5a
chr17	15851105	15851269	-0.210434	10	0.00093494	1	Intergenic	Intergenic	36312	NM_001013138	Tspan17
chr17	27272581	27272848	-0.174391	10	0.0010002	1	intron (NM_001170334, intron 1 of 1)	-intron (NM_001170334, intron 1 of 1)	46089	NM_001170334	Gfod1
chr17	30048344	30048562	-0.240723	13	3.3382e-06	1	Intergenic	Intergenic	30873	NM_001107345	Tfap2a
chr17	38585456	38585708	-0.235986	10	3.7781e-06	1	intron (NM_001039606, intron 4 of 10)	-intron (NM_001039606, intron 4 of 10)	123849	NM_001039606	Gmds
chr17	39024759	39024901	-0.205892	10	0.00016724	1	Intergenic	Intergenic	5341	NM_134338	Foxc1
chr17	39265391	39265644	-0.192447	10	0.00021928	1	Intergenic	Intergenic	69511	NM_022858	Foxq1
chr17	42238915	42239119	-0.154286	10	0.00016406	1	Intergenic	Intergenic	66133	NM_001271205	Sox4
chr17	50341397	50341548	-0.160085	12	0.0070801	1	Intergenic	Intergenic	9067	NM_001271221	Hist1h4m
chr17	68782611	68782745	-0.27472	10	0.0017967	1	promoter-TSS (NM_030864)	-promoter-TSS (NM_030864)	-30	NM_030864	Mtr
chr17	71823551	71823968	-0.156943	10	0.001484	1	intron (NM_001107360, intron 1 of 37)	-intron (NM_001107360, intron 1 of 37)	1143	NM_001107360	Dip2c
chr17	84058111	84058538	-0.184256	10	0.002229	1	exon (NM_001107365, exon 10 of 10)	-exon (NM_001107365, exon 10 of 10)	-248643	NM_145081	Optn
chr17	96102352	96102553	-0.163183	11	0.0017291	1	Intergenic	Intergenic	-156977	NM_012563	Gad2
chr18	12944543	12945248	-0.176992	10	0.02025	1	Intergenic	Intergenic	180676	NM_053588	Rnf138
chr18	23682498	23682666	-0.169852	10	2.509e-05	1	exon (NM_001013060, exon 1 of 5)	-exon (NM_001013060, exon 1 of 5)	345	NM_001013060	Rit2
chr18	26831730	26832040	-0.172074	10	2.3684e-05	1	intron (NM_001108888, intron 2 of 4)	-intron (NM_001108888, intron 2 of 4)	13293	NM_001108888	Reep5
chr18	28991795	28992782	-0.166814	12	0.0013346	1	Intergenic	Intergenic	104186	NM_001108427	Pfdn1
chr18	29358157	29358465	-0.224766	10	3.5041e-06	1	Intergenic	Intergenic	17879	NM_021744	Cd14
chr18	30327140	30327549	-0.169576	12	7.2099e-06	1	Intergenic	Intergenic	4881	NM_001114604	Pcdhb21
chr18	30656523	30656629	-0.155561	10	5.4961e-06	1	exon (NM_001037135, exon 1 of 3)	-exon (NM_001037135, exon 1 of 3)	732	NM_001037135	Pcdhga10
chr18	31178609	31178795	-0.20714	10	0.032124	1	promoter-TSS (NM_199493)	-promoter-TSS (NM_199493)	-90	NM_199493	RGD735029
chr18	31492440	31492698	-0.274559	10	0.00013463	1	Intergenic	Intergenic	55017	NM_001106150	Spry4
chr18	4917317	4917375	-0.150359	10	0.041655	1	Intergenic	Intergenic	231139	NM_001107403	Zfp521
chr18	61794682	61795424	-0.151383	12	0.00058728	1	Intergenic	Intergenic	-73928	NM_001107382	Zfp532
chr18	66623618	66623829	-0.189134	11	0.00019643	1	intron (NM_001077667, intron 1 of 8)	-intron (NM_001077667, intron 1 of 8)	151	NM_001077667	Ccdc68
chr18	72091480	72091752	-0.216924	10	0.0003493	1	intron (NM_001106133, intron 13 of 17)	-intron (NM_001106133, intron 13 of 17)	202563	NM_001106133	Dym
chr18	77540333	77540404	-0.179823	10	9.7581e-06	1	intron (NM_001244933, intron 4 of 5)	-intron (NM_001244933, intron 4 of 5)	53486	NM_001244933	Nfatc1
chr18	77871186	77871273	-0.151525	10	0.00017067	1	Intergenic	Intergenic	-12577	NM_001108892	Sall3
chr18	78940281	78940655	-0.155795	14	0.001284	1	Intergenic	Intergenic	-3140	NM_001025289	Mbp
chr19	10373935	10374278	-0.165612	10	0.00083845	1	Intergenic	Intergenic	-1097	NM_001024746	Katnb1
chr19	10468047	10468743	-0.159889	15	5.9504e-05	1	intron (NM_152242, intron 1 of 13)	-intron (NM_152242, intron 1 of 13)	7212	NM_152242	Adgrg1
chr19	10497211	10497473	-0.165092	16	6.0985e-06	1	Intergenic	Intergenic	-21735	NM_152242	Adgrg1
chr19	11045361	11045591	-0.208426	10	0.0054688	1	intron (NM_053523, intron 1 of 7)	-intron (NM_053523, intron 1 of 7)	1438	NM_053523	Herpud1
chr19	11621852	11622387	-0.162141	10	0.0067234	1	intron (NM_017327, intron 2 of 8)	-intron (NM_017327, intron 2 of 8)	1480	NM_017327	Gnao1
chr19	14145476	14145519	-0.209357	13	1.9067e-06	1	Intergenic	Intergenic	52228	NM_133568	Rasd2
chr19	15751281	15751498	-0.177149	12	4.4924e-06	1	promoter-TSS (NM_001030044)	-promoter-TSS (NM_001030044)	-976	NM_001030044	Irx5
chr19	16341321	16341512	-0.171385	10	0.00039115	1	Intergenic	Intergenic	-3762	NM_001107413	Irx3
chr19	19275389	19275652	-0.154961	12	0.00024912	1	Intergenic	Intergenic	-3362	NM_001107415	Sall1
chr19	19841756	19842014	-0.186144	12	1.7943e-05	1	Intergenic	Intergenic	-8784	NM_001271381	Nkd1
chr19	19904076	19904328	-0.248409	12	7.5562e-06	1	Intergenic	Intergenic	-71101	NM_001271381	Nkd1
chr19	22896575	22897102	-0.176908	12	0.0021107	1	intron (NM_001012057, intron 5 of 10)	-intron (NM_001012057, intron 5 of 10)	18714	NM_001012057	Gpt2
chr19	22929874	22930272	-0.197566	10	0.00076136	1	Intergenic	Intergenic	-14520	NM_001012057	Gpt2
chr19	25112870	25113002	-0.177496	13	2.7909e-05	1	Intergenic	Intergenic	5164	NM_001007677	Lyl1
chr19	25659693	25659816	-0.3	10	0.0009627	1	Intergenic	Intergenic	-7629	NR_031897	Mir181c
chr19	25696082	25696259	-0.181102	10	0.0050556	1	intron (NM_001013869, intron 1 of 27)	-intron (NM_001013869, intron 1 of 27)	387	NM_001013869	Cc2d1a
chr19	26731717	26731954	-0.154998	10	0.00094062	1	Intergenic	Intergenic	-59361	NM_001134539	Tbc1d9
chr19	29690749	29691036	-0.19504	12	0.0017521	1	Intergenic	Intergenic	-61702	NM_001191817	Hhip
chr19	35084072	35084216	-0.162462	10	1.7564e-05	1	exon (NM_001109128, exon 3 of 3)	-exon (NM_001109128, exon 3 of 3)	-1388	NM_001106177	Hsf4
chr19	38409439	38409689	-0.168251	12	0.00046033	1	Intergenic	Intergenic	-950124	NM_001107426	Psmd7
chr19	40415254	40415318	-0.183776	12	0.024009	1	Intergenic	Intergenic	-123106	NM_177930	Vac14
chr19	47400203	47400518	-0.217041	10	0.0038826	1	intron (NM_001163273, intron 1 of 20)	-intron (NM_001163273, intron 1 of 20)	35866	NM_001163273	Cmip
chr19	47506167	47506544	-0.154991	10	3.7785e-06	1	intron (NM_001163273, intron 3 of 20)	-intron (NM_001163273, intron 3 of 20)	-104507	NM_017168	Plcg2
chr19	49292357	49292740	-0.187255	13	1.4047e-05	1	intron (NM_138889, intron 5 of 13)	-intron (NM_138889, intron 5 of 13)	-296952	NM_173119	Hsbp1
chr19	49713174	49713317	-0.216732	10	0.00060724	1	intron (NM_133415, intron 8 of 12)	-intron (NM_133415, intron 8 of 12)	21779	NM_133415	Necab2
chr19	49756961	49757265	-0.153087	10	3.5142e-06	1	exon (NM_053569, exon 21 of 23)	-exon (NM_053569, exon 21 of 23)	-12864	NM_001192009	Slc38a8
chr19	50886212	50886815	-0.24519	10	1.9133e-05	1	Intergenic	Intergenic	41154	NM_001106190	Gins2
chr19	52362308	52362531	-0.154144	10	0.0010997	1	Intergenic	Intergenic	-164294	NM_001242627	Zfpm1
chr19	52624084	52624302	-0.19452	10	0.0016258	1	TTS (NM_181364)	-TTS (NM_181364)	3615	NM_181364	Trhr2
chr19	53192940	53193097	-0.168779	10	1.8903e-06	1	exon (NM_207613, exon 12 of 13)	-exon (NM_207613, exon 12 of 13)	10485	NM_207613	Cdh15
chr19	53197834	53197942	-0.167123	10	6.9701e-05	1	Intergenic	Intergenic	15354	NM_207613	Cdh15
chr19	54467291	54467597	-0.177322	10	0.00021907	1	Intergenic	Intergenic	-12517	NM_001106196	Galnt2
chr19	54562571	54562925	-0.200535	10	0.00016634	1	intron (NM_001106198, intron 1 of 6)	-intron (NM_001106198, intron 1 of 6)	45763	NM_001106198	Pgbd5
chr2	116723987	116724142	-0.201269	10	2.7068e-06	1	Intergenic	Intergenic	77019	NM_032059	Prkci
chr2	123109656	123109887	-0.205977	10	9.0812e-06	1	promoter-TSS (NM_001012180)	-promoter-TSS (NM_001012180)	90	NM_001012180	Bbs7
chr2	140457238	140457346	-0.168738	10	9.1333e-05	1	promoter-TSS (NM_001109558)	-promoter-TSS (NM_001109558)	-713	NM_001109558	Setd7
chr2	141230280	141230484	-0.184576	11	5.3684e-06	1	Intergenic	Intergenic	103037	NM_001191846	Foxo1
chr2	177762602	177762758	-0.227803	10	5.9789e-05	1	Intergenic	Intergenic	-120878	NM_001134592	Fam160a1
chr2	181414856	181415166	-0.261946	10	1.5273e-05	1	exon (NM_001107691, exon 3 of 9)	-exon (NM_001107691, exon 3 of 9)	1992	NM_001107691	Trim46
chr2	181857738	181857887	-0.240142	15	0.00020601	1	intron (NM_019315, intron 7 of 7)	-intron (NM_019315, intron 7 of 7)	-77433	NM_031006	Adar
chr2	186645584	186645640	-0.184744	12	1.0742e-05	1	promoter-TSS (NM_031114)	-promoter-TSS (NM_031114)	-62	NM_031114	S100a10
chr2	191196915	191197154	-0.170811	12	1.0155e-05	1	Intergenic	Intergenic	-93093	NM_001100836	Fcgr1a
chr2	191201509	191201665	-0.155591	10	0.0016145	1	Intergenic	Intergenic	-97645	NM_001100836	Fcgr1a
chr2	193075683	193075818	-0.1939	19	1.9192e-06	1	intron (NM_001004096, intron 4 of 4)	-intron (NM_001004096, intron 4 of 4)	9324	NM_001004096	Reg4
chr2	205501739	205501804	-0.153111	10	9.8235e-05	1	intron (NM_001106465, intron 5 of 7)	-intron (NM_001106465, intron 5 of 7)	304477	NM_001106465	Ntng1
chr2	219119055	219119237	-0.281416	10	5.2145e-06	1	intron (NM_001107722, intron 3 of 11)	-intron (NM_001107722, intron 3 of 11)	43940	NM_001107722	Bcar3
chr2	25906016	25906275	-0.19843	10	2.7807e-05	1	Intergenic	Intergenic	-7018	NM_053897	F2rl1
chr2	27137858	27138098	-0.164084	10	0.00021401	1	intron (NM_013134, intron 6 of 19)	-intron (NM_013134, intron 6 of 19)	11602	NM_013134	Hmgcr
chr2	29310981	29311805	-0.194904	20	1.8384e-05	1	promoter-TSS (NM_001013903)	-promoter-TSS (NM_001013903)	-743	NM_001013903	Tmem171
chr2	59915044	59915235	-0.23604	10	1.7704e-05	1	Intergenic	Intergenic	77206	NM_001106419	Rad1
chr2	94496747	94497079	-0.178865	10	6.5277e-06	1	Intergenic	Intergenic	72123	NM_024489	Zbtb10
chr2	9683511	9683665	-0.155659	12	0.0020648	1	Intergenic	Intergenic	-68359	NM_001009698	Lysmd3
chr20	10215143	10215552	-0.167446	10	0.0032346	1	Intergenic	Intergenic	76387	NM_021693	Sik1
chr20	10517281	10517798	-0.230295	10	0.00026479	1	Intergenic	Intergenic	-24116	NM_031769	Pdxk
chr20	11691956	11692323	-0.168085	12	0.00016673	1	intron (NM_012894, intron 2 of 10)	-intron (NM_001111055, intron 2 of 10)	75422	NM_001111057	Adarb1
chr20	11977519	11977755	-0.208773	10	0.00012628	1	intron (NM_053489, intron 37 of 40)	-intron (NM_053489, intron 37 of 40)	23655	NM_017299	Slc19a1
chr20	12789979	12790382	-0.154704	10	0.049414	1	Intergenic	Intergenic	-10218	NM_001025144	Prmt2
chr20	13124595	13124924	-0.153002	16	0.00015428	1	TTS (NM_001007008)	-TTS (NM_001007008)	1701	NM_001007008	Chchd10
chr20	13170233	13170456	-0.216852	13	2.8465e-05	1	Intergenic	Intergenic	-4497	NM_001109577	Derl3
chr20	27398952	27399085	-0.20509	10	5.2134e-05	1	intron (NM_001108533, intron 3 of 11)	-intron (NM_001108533, intron 3 of 11)	1192	NM_001108533	Spock2
chr20	29461757	29461945	-0.164985	10	0.00037817	1	Intergenic	Intergenic	35887	NM_001127452	RGD1305587
chr20	3782106	3782562	-0.168779	10	0.0011733	1	TTS (NM_212531)	-TTS (NM_212531)	-5072	NM_198739	Ly6g5c
chr20	43783817	43784116	-0.201538	10	0.00022308	1	intron (NM_001044248, intron 6 of 8)	-intron (NM_001044248, intron 6 of 8)	36345	NM_001044248	Traf3ip2
chr20	43816802	43816933	-0.164079	10	4.5915e-05	1	Intergenic	Intergenic	-53641	NM_001083966	Rev3l
chr20	46231859	46232159	-0.175109	10	0.00021259	1	intron (NM_001106395, intron 2 of 3)	-intron (NM_001106395, intron 2 of 3)	30809	NM_001106395	Foxo3
chr20	48833967	48834250	-0.22935	10	5.8755e-06	1	Intergenic	Intergenic	-190808	NM_031324	Prep
chr20	4999560	4999678	-0.166044	10	7.2955e-05	1	exon (NM_001008830, exon 3 of 8)	-exon (NM_001008830, exon 3 of 8)	974	NM_001008830	RT1-A3
chr20	54915557	54915825	-0.186904	12	0.00055489	1	intron (NM_001107641, intron 1 of 10)	-intron (NM_001107641, intron 1 of 10)	7513	NM_001107641	Sim1
chr20	5648949	5649302	-0.150049	11	0.020415	1	intron (NM_022666, intron 3 of 7)	-intron (NM_022666, intron 3 of 7)	78148	NM_022666	Grm4
chr20	5764673	5764816	-0.161266	13	5.7694e-05	1	Intergenic	Intergenic	-4307	NM_139327	Hmga1
chr20	5986575	5986977	-0.197591	10	0.00014766	1	intron (NM_001047939, intron 12 of 14)	-intron (NM_001039607, intron 3 of 4)	21855	NM_001047939	LOC499407
chr20	6017346	6017806	-0.153175	10	0.00046083	1	intron (NM_001039607, intron 1 of 4)	-intron (NM_001039607, intron 1 of 4)	16148	NM_001039607	LOC294154
chr20	6225108	6225647	-0.164297	10	9.9025e-05	1	intron (NM_001107613, intron 11 of 23)	-intron (NM_001107613, intron 11 of 23)	68034	NM_001007695	Tcp11
chr20	7639057	7639287	-0.153317	13	1.4765e-05	1	intron (NM_001170481, intron 1 of 6)	-intron (NM_001170481, intron 1 of 6)	2890	NM_001170481	Pi16
chr20	7639733	7639883	-0.15342	10	0.00072335	1	intron (NM_001170481, intron 2 of 6)	-intron (NM_001170481, intron 2 of 6)	3526	NM_001170481	Pi16
chr20	8202126	8202259	-0.224235	12	1.2433e-05	1	Intergenic	Intergenic	-2044	NM_001107618	Mdga1
chr3	10196727	10197303	-0.17444	10	0.0017207	1	intron (NM_138914, intron 1 of 15)	-intron (NM_138914, intron 1 of 15)	5184	NM_138914	Fnbp1
chr3	113121345	113121734	-0.17637	11	3.1525e-06	1	Intergenic	Intergenic	-29112	NM_001168527	Secisbp2l
chr3	121373006	121373709	-0.176633	10	0.00072201	1	intron (NM_017178, intron 1 of 3)	-intron (NM_017178, intron 1 of 3)	666	NM_017178	Bmp2
chr3	1277677	1277987	-0.152667	10	0.0025613	1	intron (NM_001024308, intron 2 of 4)	-intron (NM_001024308, intron 2 of 4)	2105	NM_001024308	LOC499742
chr3	134902746	134903109	-0.187324	10	0.00077796	1	Intergenic	Intergenic	-348258	NM_053797	Crnkl1
chr3	135846721	135847003	-0.176864	14	0.00012592	1	Intergenic	Intergenic	-6899	NM_001191904	Nkx2-2
chr3	139974464	139974737	-0.175189	10	0.00011217	1	Intergenic	Intergenic	540431	NM_001025020	Syndig1
chr3	142457675	142457982	-0.258678	10	3.3665e-06	1	intron (NM_001047858, intron 1 of 1)	-intron (NM_001047858, intron 1 of 1)	655	NM_001047858	Srxn1
chr3	142713194	142713474	-0.183013	10	2.4448e-05	1	Intergenic	Intergenic	2521	NM_001168650	Sox12
chr3	144153209	144153762	-0.16301	11	0.010448	1	Intergenic	Intergenic	32954	NM_138509	Mapre1
chr3	144873496	144873646	-0.193058	10	0.016289	1	intron (NM_001100901, intron 1 of 7)	-intron (NM_001100901, intron 1 of 7)	667	NM_001100901	Snta1
chr3	144895831	144896143	-0.177856	10	0.00094472	1	Intergenic	Intergenic	-8546	NM_001168542	Cbfa2t2
chr3	145310203	145310724	-0.194556	17	0.00053203	1	intron (NM_001011958, intron 2 of 6)	-intron (NM_001011958, intron 2 of 6)	34632	NM_001011958	Raly
chr3	148165420	148165487	-0.193874	10	5.2642e-06	1	intron (NM_031977, intron 6 of 11)	-intron (NM_031977, intron 6 of 11)	8198	NM_031977	Src
chr3	148832115	148832213	-0.19071	10	0.0001023	1	TTS (NM_019386)	-TTS (NM_019386)	30221	NM_019386	Tgm2
chr3	152862809	152862992	-0.183177	10	9.3994e-06	1	intron (NM_001108603, intron 4 of 25)	-intron (NM_001108603, intron 4 of 25)	309175	NM_001108603	Ptprt
chr3	154938184	154938378	-0.151068	12	3.4003e-06	1	intron (NM_019377, intron 1 of 5)	-intron (NM_019377, intron 1 of 5)	12256	NM_019377	Ywhab
chr3	155411106	155411413	-0.168438	10	1.737e-05	1	TTS (NM_001106539)	-TTS (NM_001106539)	-13860	NM_001108604	Rbpjl
chr3	155582266	155582458	-0.208846	12	4.934e-05	1	promoter-TSS (NM_173109)	-promoter-TSS (NM_173109)	-16	NM_173109	Wfdc2
chr3	156617076	156617235	-0.259855	10	1.3219e-05	1	Intergenic	Intergenic	56705	NM_001108963	Slc2a10
chr3	157642342	157642641	-0.196726	10	0.00061297	1	Intergenic	Intergenic	221451	NM_001135718	Prex1
chr3	157718943	157719430	-0.178908	13	2.7301e-05	1	intron (NM_001135718, intron 18 of 39)	-intron (NM_001135718, intron 18 of 39)	144756	NM_001135718	Prex1
chr3	157738095	157738503	-0.256511	10	2.7817e-06	1	intron (NM_001135718, intron 10 of 39)	-intron (NM_001135718, intron 10 of 39)	125644	NM_001135718	Prex1
chr3	157762667	157762896	-0.249902	10	1.8107e-05	1	intron (NM_001135718, intron 7 of 39)	-intron (NM_001135718, intron 7 of 39)	101161	NM_001135718	Prex1
chr3	157943893	157944172	-0.171501	10	0.018431	1	Intergenic	Intergenic	-5531	NM_001108606	Tp53rk
chr3	158677217	158677350	-0.158007	10	0.00036996	1	intron (NM_053805, intron 1 of 2)	-intron (NM_053805, intron 1 of 2)	304	NM_053805	Snai1
chr3	158787002	158787686	-0.160996	13	0.003287	1	intron (NM_001113752, intron 1 of 4)	-intron (NM_001113752, intron 1 of 4)	2910	NM_001113752	Tmem189
chr3	158822706	158823002	-0.205748	10	4.2422e-05	1	Intergenic	Intergenic	-3563	NM_001301715	Cebpb
chr3	158884471	158884906	-0.210263	10	0.00015711	1	Intergenic	Intergenic	58272	NM_001301720	Cebpb
chr3	159248993	159249222	-0.173979	10	8.5925e-06	1	exon (NM_001108609, exon 3 of 3)	-exon (NM_001108609, exon 3 of 3)	18435	NM_001108609	Pard6b
chr3	159446984	159447182	-0.190224	10	5.0451e-06	1	exon (NM_001106545, exon 1 of 4)	-exon (NM_001106545, exon 1 of 4)	151	NM_001106545	Kcng1
chr3	159522933	159523165	-0.161467	13	0.00057368	1	Intergenic	Intergenic	-75815	NM_001106545	Kcng1
chr3	159889972	159890286	-0.158099	12	0.0010139	1	Intergenic	Intergenic	112915	NM_001106546	Zfp93
chr3	159918519	159918839	-0.238006	10	0.00015567	1	Intergenic	Intergenic	84365	NM_001106546	Zfp93
chr3	161358924	161359081	-0.194758	10	5.7005e-05	1	Intergenic	Intergenic	116652	NM_145670	Bcas1
chr3	163457530	163457782	-0.25977	10	4.5504e-06	1	Intergenic	Intergenic	-1627	NM_201420	Tfap2c
chr3	163890381	163890759	-0.168645	10	0.0041137	1	intron (NM_001108965, intron 2 of 2)	-intron (NM_001108965, intron 2 of 2)	5082	NM_001108965	Rbm38
chr3	164118725	164118846	-0.193202	12	6.8259e-05	1	Intergenic	Intergenic	-13874	NM_001107807	Pmepa1
chr3	164153756	164154077	-0.174403	10	0.00016773	1	Intergenic	Intergenic	-49005	NM_001107807	Pmepa1
chr3	164993460	164993710	-0.270142	10	2.6291e-06	1	Intergenic	Intergenic	-1604	NM_001108610	Stx16
chr3	169752087	169752175	-0.152016	10	0.00012896	1	Intergenic	Intergenic	-55197	NM_198743	Gid8
chr3	18135288	18135477	-0.16225	10	0.00022415	1	intron (NM_001106571, intron 3 of 4)	-intron (NM_001106571, intron 3 of 4)	5928	NM_001106571	Lhx2
chr3	18477797	18477974	-0.174687	13	4.5453e-06	1	Intergenic	Intergenic	-26678	NM_053532	Psmb7
chr3	2667758	2667974	-0.170363	12	7.5411e-05	1	Intergenic	Intergenic	44948	NM_001134881	Psd4
chr3	3308338	3308607	-0.189789	10	0.00028845	1	Intergenic	Intergenic	-33452	NM_001143750	Nrarp
chr3	3535890	3535958	-0.181575	10	0.0016087	1	Intergenic	Intergenic	-2553	NM_001109418	Sapcd2
chr3	3601968	3602854	-0.209886	10	0.00043796	1	intron (NM_024396, intron 8 of 47)	-intron (NM_024396, intron 8 of 47)	6988	NM_024396	Abca2
chr3	3671095	3671182	-0.170248	10	0.0039617	1	TTS (NM_001106555)	-TTS (NM_001106555)	-2779	NM_001025730	Fbxw5
chr3	43484235	43484549	-0.234776	10	0.011011	1	Intergenic	Intergenic	73798	NM_145788	Tank
chr3	4514894	4515118	-0.205823	11	7.363e-06	1	promoter-TSS (NM_001145469)	-promoter-TSS (NM_001145469)	-11	NM_001145469	Gpsm1
chr3	55774770	55774920	-0.201166	10	2.6133e-06	1	Intergenic	Intergenic	-1495	NM_001191902	Sp9
chr3	57342588	57342923	-0.20908	10	0.00010571	1	intron (NM_001105885, intron 5 of 5)	-intron (NM_001105885, intron 5 of 5)	1903	NR_031815	Mir10b
chr3	6217480	6217839	-0.177886	11	1.3716e-05	1	intron (NM_001106563, intron 3 of 27)	-intron (NM_001106563, intron 3 of 27)	-75095	NM_053664	Sardh
chr3	74904472	74904868	-0.165084	10	0.00036432	1	intron (NM_017269, intron 1 of 19)	-intron (NM_017269, intron 1 of 19)	30940	NM_017269	Ptprj
chr3	77369219	77369627	-0.156832	10	0.00024311	1	Intergenic	Intergenic	51545	NM_030839	Syt13
chr3	77588643	77588881	-0.152668	10	3.0171e-05	1	intron (NM_001107749, intron 1 of 7)	-intron (NM_001107749, intron 1 of 7)	1216	NM_001107749	Tp53i11
chr3	890767	891006	-0.150233	10	0.0018057	1	Intergenic	Intergenic	389050	NM_001024308	LOC499742
chr3	89368561	89369033	-0.166517	10	0.00015767	1	Intergenic	Intergenic	12598	NM_001244781	Lmo2
chr3	91128407	91128780	-0.210671	10	2.7767e-05	1	intron (NM_013001, intron 1 of 11)	-intron (NM_013001, intron 1 of 11)	989	NM_013001	Pax6
chr3	93841634	93841763	-0.182481	10	0.00098716	1	Intergenic	Intergenic	981408	NM_001024981	Mettl15
chr3	9460396	9460675	-0.155267	10	0.0010016	1	intron (NM_001004085, intron 1 of 13)	-intron (NM_001004085, intron 1 of 13)	644	NM_001004085	Crat
chr3	9730631	9730734	-0.173162	10	2.3482e-05	1	Intergenic	Intergenic	122852	NM_001100979	RGD1311084
chr4	117297983	117298071	-0.157622	10	2.324e-05	1	promoter-TSS (NM_001109244)	-promoter-TSS (NM_001109244)	66	NM_001109244	Lbx2
chr4	117579291	117579409	-0.211423	10	6.4789e-05	1	Intergenic	Intergenic	16813	NM_001106601	Bola3
chr4	117674841	117675334	-0.210239	10	1.7878e-05	1	Intergenic	Intergenic	50295	NM_001106602	Dguok
chr4	119732964	119733136	-0.161287	11	4.1737e-06	1	exon (NM_001107871, exon 5 of 12)	-exon (NM_001107871, exon 5 of 12)	7110	NM_001107871	Fbxo41
chr4	120781863	120782199	-0.234138	12	8.4503e-06	1	Intergenic	Intergenic	40315	NM_001100749	Mxd1
chr4	123104121	123104284	-0.212085	10	0.00048339	1	Intergenic	Intergenic	108881	NM_053534	Tpra1
chr4	125326463	125326833	-0.201183	10	3.5773e-05	1	intron (NM_001106610, intron 1 of 9)	-intron (NM_001106610, intron 1 of 9)	504	NM_001106610	Hdac11
chr4	125881563	125882127	-0.24207	10	3.7778e-06	1	intron (NM_017206, intron 1 of 14)	-intron (NM_017206, intron 1 of 14)	6028	NM_017206	Slc6a6
chr4	128225334	128225541	-0.239124	10	5.2643e-06	1	intron (NM_001030045, intron 2 of 17)	-intron (NM_001030045, intron 2 of 17)	371681	NM_001030045	Magi1
chr4	134816665	134816993	-0.177429	10	0.00025812	1	Intergenic	Intergenic	-242342	NM_001037541	Prok2
chr4	154490337	154490616	-0.2022	10	1.4278e-05	1	intron (NM_012643, intron 1 of 19)	-intron (NM_001110099, intron 1 of 18)	626	NM_001110099	Ret
chr4	155847526	155847863	-0.160722	11	0.0011441	1	Intergenic	Intergenic	22895	NM_001271276	Fbxl14
chr4	162308036	162308706	-0.185155	12	0.00031865	1	intron (NM_053018, intron 1 of 7)	-intron (NM_053018, intron 1 of 7)	4518	NM_053018	Cd9
chr4	164130478	164130792	-0.194919	10	6.5488e-06	1	Intergenic	Intergenic	86883	NM_001271385	Prmt8
chr4	164913984	164914109	-0.186214	10	0.0010066	1	Intergenic	Intergenic	-175346	NM_001002833	Senp17
chr4	182600319	182600468	-0.210459	10	5.1294e-05	1	Intergenic	Intergenic	92523	NM_017253	Bcat1
chr4	184685051	184685226	-0.223688	10	5.101e-05	1	Intergenic	Intergenic	-3787	NM_001109257	Klhl42
chr4	2526439	2526761	-0.16196	10	0.00057478	1	Intergenic	Intergenic	-50871	NM_001109214	En2
chr4	31756255	31756450	-0.27678	10	9.5705e-06	1	Intergenic	Intergenic	26414	NM_012943	Dlx5
chr4	55934238	55934426	-0.159724	13	0.00074446	1	Intergenic	Intergenic	-9498	NM_013076	Lep
chr4	59879945	59880142	-0.28335	10	3.8719e-06	1	Intergenic	Intergenic	290859	NM_001106588	Chchd3
chr4	6421509	6421769	-0.168853	10	0.0037614	1	intron (NM_001012187, intron 1 of 10)	-intron (NM_001012187, intron 1 of 10)	732	NM_001012187	Klhl7
chr4	79855935	79856076	-0.158859	10	0.00010183	1	Intergenic	Intergenic	66450	NM_001013085	Snx10
chr4	82856690	82857081	-0.193345	10	2.0084e-05	1	intron (NM_147211, intron 1 of 8)	-intron (NM_147211, intron 1 of 8)	33877	NM_147211	Wipf3
chr4	84477456	84477827	-0.150475	10	6.9802e-05	1	exon (NM_001109237, exon 2 of 2)	-exon (NM_001109237, exon 2 of 2)	1674	NM_001109237	Neurod6
chr4	8771517	8771795	-0.215722	10	8.3666e-05	1	Intergenic	Intergenic	-11975	NM_022395	Pmpcb
chr5	102919045	102919506	-0.159086	13	3.718e-06	1	Intergenic	Intergenic	554967	NM_001106666	Bnc2
chr5	108906976	108907090	-0.154847	10	4.0632e-05	1	Intergenic	Intergenic	9347	NM_031550	Cdkn2a
chr5	108929327	108929486	-0.166518	10	5.464e-05	1	Intergenic	Intergenic	-13027	NM_031550	Cdkn2a
chr5	127371205	127371320	-0.324611	10	0.00046303	1	exon (NM_001271206, exon 1 of 69)	-exon (NM_001271206, exon 1 of 69)	296	NM_001271206	Usp24
chr5	127596422	127596463	-0.232897	10	0.0015901	1	Intergenic	Intergenic	-40995	NM_001080148	Dhcr24
chr5	127695590	127695774	-0.168709	12	0.00014424	1	promoter-TSS (NM_001109262)	-promoter-TSS (NM_001109262)	-15	NM_001109262	RGD1559493
chr5	131415388	131415553	-0.200458	10	9.2581e-06	1	exon (NM_001107951, exon 4 of 4)	-exon (NM_001107951, exon 4 of 4)	5020	NM_001107951	Dmrta2
chr5	135051488	135051730	-0.186464	10	5.6265e-05	1	Intergenic	Intergenic	234939	NM_134339	Foxe3
chr5	140828289	140828792	-0.163484	10	0.0030622	1	Intergenic	Intergenic	85855	NM_012549	Edn2
chr5	141624233	141624359	-0.241126	10	9.6474e-06	1	intron (NM_001108675, intron 1 of 31)	-intron (NM_001108675, intron 1 of 31)	931	NM_001108675	Col9a2
chr5	142421472	142421617	-0.151532	10	0.0024499	1	Intergenic	Intergenic	-10714	NM_001012221	Oxct2a
chr5	144335950	144336290	-0.166927	10	0.00011539	1	intron (NM_001107980, intron 1 of 5)	-intron (NM_001107980, intron 1 of 5)	3818	NM_001107980	Rspo1
chr5	144627349	144627521	-0.150432	10	0.00058478	1	Intergenic	Intergenic	-160160	NM_001077671	Zc3h12a
chr5	145520580	145520736	-0.204185	10	0.00052408	1	promoter-TSS (NM_001162535)	-promoter-TSS (NM_001162535)	-582	NM_001162535	Sh3d21
chr5	146245255	146245895	-0.185286	10	0.00056201	1	intron (NM_001159655, intron 12 of 20)	-intron (NM_001159655, intron 12 of 20)	78283	NM_001159655	LOC100294508
chr5	146805042	146805340	-0.189954	10	5.6982e-05	1	Intergenic	Intergenic	-1527	NM_019241	Gjb5
chr5	149078317	149078505	-0.303128	10	1.8476e-05	1	exon (NM_001302967, exon 6 of 70)	-exon (NM_001302967, exon 6 of 70)	5555	NM_001302967	Col16a1
chr5	149170671	149170765	-0.1845	10	0.00015467	1	promoter-TSS (NM_013064)	-promoter-TSS (NM_013064)	18	NM_013064	Hcrtr1
chr5	151563232	151563444	-0.151097	14	0.00062565	1	intron (NM_001004268, intron 1 of 3)	-intron (NM_001004268, intron 1 of 3)	421	NM_001004268	Kdf1
chr5	152146815	152146995	-0.151447	10	0.00015796	1	exon (NM_024145, exon 1 of 13)	-exon (NM_024145, exon 1 of 13)	152	NM_024145	Fgr
chr5	152982333	152982608	-0.151095	10	0.00033977	1	intron (NM_001039011, intron 1 of 20)	-intron (NM_001039011, intron 1 of 20)	737	NM_001039011	Cnksr1
chr5	155555519	155555906	-0.190162	10	0.0020091	1	intron (NM_001127319, intron 1 of 15)	-intron (NM_001127319, intron 1 of 15)	49671	NM_001127319	Ephb2
chr5	156245455	156245681	-0.202846	11	4.5885e-05	1	Intergenic	Intergenic	36461	NM_001109567	LOC690206
chr5	156665748	156666316	-0.205108	12	7.757e-05	1	intron (NM_053596, intron 1 of 18)	-intron (NM_053596, intron 1 of 18)	30376	NM_053596	Ece1
chr5	157206051	157206347	-0.174601	10	9.7685e-05	1	Intergenic	Intergenic	-7151	NM_001106695	Mul1
chr5	159114307	159114556	-0.202128	11	6.0216e-06	1	intron (NM_001271454, intron 1 of 5)	-intron (NM_001271454, intron 1 of 5)	33613	NM_001271454	Igsf21
chr5	159595826	159596043	-0.264873	12	5.3284e-06	1	intron (NM_017227, intron 5 of 15)	-intron (NM_017227, intron 5 of 15)	18693	NM_017227	Padi4
chr5	160099740	160099927	-0.188616	10	0.0049886	1	exon (NM_001108692, exon 6 of 18)	-exon (NM_001108692, exon 6 of 18)	8040	NM_001108692	Arhgef19
chr5	160100567	160101130	-0.169021	16	2.8421e-05	1	intron (NM_001108692, intron 8 of 17)	-intron (NM_001108692, intron 8 of 17)	9055	NM_001108692	Arhgef19
chr5	160361781	160362392	-0.160978	18	0.00055537	1	exon (NM_001271495, exon 13 of 16)	-exon (NM_001271495, exon 13 of 16)	24099	NM_001012105	Zbtb17
chr5	162175904	162176411	-0.161411	17	0.0016572	1	promoter-TSS (NM_019358)	-promoter-TSS (NM_019358)	-237	NM_019358	Pdpn
chr5	165179888	165180060	-0.154444	12	0.00020994	1	Intergenic	Intergenic	-15404	NM_001007654	Agtrap
chr5	165335247	165335477	-0.219721	10	2.269e-05	1	Intergenic	Intergenic	96282	NM_053511	Fbxo2
chr5	165751998	165752323	-0.192228	10	0.00077734	1	Intergenic	Intergenic	-42630	NM_001011979	Tardbp
chr5	165884618	165884841	-0.174222	11	9.1406e-06	1	Intergenic	Intergenic	-175199	NM_001011979	Tardbp
chr5	167347562	167347680	-0.1763	12	1.3965e-05	1	intron (NM_001134841, intron 2 of 7)	-intron (NM_001134841, intron 2 of 7)	3259	NM_001134841	Car6
chr5	167766336	167766574	-0.150671	10	0.0061069	1	exon (NM_053885, exon 13 of 23)	-exon (NM_053885, exon 13 of 23)	40799	NM_144747	Slc45a1
chr5	169104545	169104653	-0.159477	10	0.0061634	1	Intergenic	Intergenic	-32548	NM_001195560	Camta1
chr5	169304853	169305278	-0.173959	11	2.2164e-05	1	intron (NM_201272, intron 1 of 21)	-intron (NM_201272, intron 1 of 21)	3971	NM_201272	Plekhg5
chr5	169725356	169725689	-0.155945	10	0.00019768	1	intron (NM_001037650, intron 3 of 29)	-intron (NM_001037650, intron 3 of 29)	14485	NM_001037650	Nphp4
chr5	169763258	169763404	-0.175062	12	3.3572e-06	1	intron (NM_001037650, intron 11 of 29)	-intron (NM_001037650, intron 11 of 29)	52293	NM_001037650	Nphp4
chr5	169800743	169801526	-0.163136	11	0.00015685	1	Intergenic	Intergenic	90097	NM_001037650	Nphp4
chr5	172062224	172062532	-0.199922	10	0.00014817	1	exon (NM_022507, exon 17 of 17)	-exon (NM_022507, exon 17 of 17)	12773	NM_001108698	Faap20
chr5	173020576	173021072	-0.203478	18	3.8321e-06	1	promoter-TSS (NM_175754)	-promoter-TSS (NM_175754)	-60	NM_175754	Agrn
chr5	22590776	22590853	-0.170667	12	0.00037526	1	Intergenic	Intergenic	105248	NM_001135894	Wdr25l
chr5	49895174	49895452	-0.169259	11	0.0016202	1	Intergenic	Intergenic	290163	NM_001107923	Rngtt
chr5	59501919	59502087	-0.154652	10	7.0153e-05	1	Intergenic	Intergenic	-10495	NM_053864	Vcp
chr5	75389805	75390079	-0.151133	10	0.0012505	1	Intergenic	Intergenic	-92394	NR_102362	LOC100910620
chr5	79691278	79691795	-0.274427	11	3.1872e-06	1	intron (NM_019340, intron 10 of 15)	-intron (NM_019340, intron 10 of 15)	67149	NM_019340	Rgs3
chr5	79744473	79744692	-0.224665	11	5.5569e-06	1	Intergenic	Intergenic	120195	NM_019340	Rgs3
chr6	10110645	10111255	-0.221515	10	0.0025379	1	Intergenic	Intergenic	-92158	NM_023090	Epas1
chr6	102979418	102979540	-0.191829	13	4.5671e-06	1	Intergenic	Intergenic	145097	NM_017172	Zfp36l1
chr6	109854526	109854799	-0.151181	10	8.2258e-05	1	exon (NM_199109, exon 1 of 8)	-exon (NM_199109, exon 1 of 8)	900	NM_199109	Flvcr2
chr6	109945251	109945507	-0.155357	10	0.038885	1	intron (NM_001106749, intron 1 of 5)	-intron (NM_001106749, intron 1 of 5)	544	NM_001106749	RGD1310769
chr6	111123457	111123697	-0.174036	12	2.9231e-06	1	promoter-TSS (NM_001039325)	-promoter-TSS (NM_001039325)	-72	NM_001039325	Zdhhc22
chr6	124749913	124750105	-0.176796	10	0.027128	1	Intergenic	Intergenic	-53581	NM_001108719	Ttc7b
chr6	125251309	125251614	-0.229669	10	0.0016648	1	Intergenic	Intergenic	-77429	NM_001108049	Gpr68
chr6	132605090	132605423	-0.162145	10	0.0031025	1	Intergenic	Intergenic	58199	NM_001109672	Ccnk
chr6	132688527	132688778	-0.266192	10	1.9825e-06	1	Intergenic	Intergenic	-11901	NM_001108723	Cyp46a1
chr6	136001359	136001414	-0.18539	10	0.00036923	1	intron (NM_001108724, intron 4 of 13)	-intron (NM_001108724, intron 4 of 13)	-30091	NM_001108061	Amn
chr6	136463113	136463586	-0.150686	16	3.5871e-06	1	exon (NM_001007706, exon 3 of 4)	-exon (NM_001007706, exon 3 of 4)	3289	NM_001007706	Trmt61a
chr6	136477747	136478108	-0.176594	10	0.0084592	1	Intergenic	Intergenic	17165	NM_001008526	Bag5
chr6	136827466	136827945	-0.215236	10	0.0061516	1	Intergenic	Intergenic	-54179	NM_001134560	Rd3l
chr6	137278715	137279063	-0.263969	10	1.2209e-05	1	Intergenic	Intergenic	71670	NM_001126280	Tmem179
chr6	144416625	144416739	-0.17422	10	0.00037501	1	intron (NM_031600, intron 12 of 22)	-intron (NM_031600, intron 12 of 22)	-104355	NR_031895	Mir153
chr6	24716285	24716489	-0.161934	19	6.3836e-06	1	intron (NM_199270, intron 3 of 11)	-intron (NM_199270, intron 3 of 11)	75531	NM_199270	Bre
chr6	26542214	26542407	-0.154529	10	0.0079018	1	exon (NM_001012191, exon 1 of 19)	-exon (NM_001012191, exon 1 of 19)	163	NM_001012191	Dtnb
chr6	26801924	26802216	-0.15277	10	9.3118e-05	1	promoter-TSS (NM_001003958)	-promoter-TSS (NM_001003958)	-542	NM_001003958	Dnmt3a
chr6	28524033	28524364	-0.211502	10	0.00060661	1	intron (NM_001106713, intron 3 of 13)	-intron (NM_001106713, intron 3 of 13)	179979	NM_001106713	Klhl29
chr6	3448104	3448153	-0.163097	17	0.00026783	1	Intergenic	Intergenic	-57468	NM_001100716	Sos1
chr6	35856367	35856668	-0.191549	10	0.00016938	1	intron (NM_001106718, intron 1 of 11)	-intron (NM_001106718, intron 1 of 11)	26021	NM_001106718	Fam49a
chr6	40838990	40839315	-0.278598	10	5.856e-06	1	Intergenic	Intergenic	73915	NM_001169104	Kcnf1
chr6	44073263	44073368	-0.160323	10	9.0478e-06	1	intron (NM_001082410, intron 1 of 8)	-intron (NM_001082410, intron 1 of 8)	624	NM_001082410	Rnf144a
chr6	75037152	75037468	-0.283877	10	3.358e-06	1	Intergenic	Intergenic	-24675	NM_001106729	Eapp
chr6	98903056	98903695	-0.162225	10	9.545e-05	1	intron (NM_022508, intron 22 of 27)	-intron (NM_022508, intron 22 of 27)	-19729	NM_133515	Akap5
chr7	10165925	10166035	-0.152449	10	0.00079121	1	exon (NM_001008356, exon 4 of 4)	-exon (NM_001008356, exon 4 of 4)	5234	NM_001008356	Slc39a3
chr7	10209527	10209752	-0.193453	10	5.6087e-05	1	intron (NM_024138, intron 1 of 2)	-intron (NM_024138, intron 1 of 2)	6528	NM_024138	Gng7
chr7	10330778	10330948	-0.164871	10	0.00048744	1	exon (NM_001047100, exon 9 of 17)	-exon (NM_001047100, exon 9 of 17)	10883	NM_001047100	Tmprss9
chr7	10332830	10332951	-0.151926	12	4.9469e-06	1	exon (NM_001047100, exon 7 of 17)	-exon (NM_001047100, exon 7 of 17)	8855	NM_001047100	Tmprss9
chr7	10735869	10736318	-0.162474	12	0.00023323	1	Intergenic	Intergenic	-55217	NM_133524	Tcf3
chr7	110858677	110859065	-0.194097	10	0.0025037	1	intron (NM_021597, intron 1 of 17)	-intron (NM_021597, intron 1 of 17)	6718	NM_021597	Ago2
chr7	11326077	11326357	-0.160687	10	0.00058961	1	intron (NM_001077642, intron 3 of 4)	-intron (NM_001077642, intron 3 of 4)	1044	NM_001077642	Cfd
chr7	114220081	114220457	-0.282986	10	3.5754e-06	1	intron (NM_022401, intron 15 of 31)	-intron (NM_001164296, intron 15 of 31)	6919	NM_001164308	Plec
chr7	114239908	114240559	-0.191994	12	1.7312e-05	1	promoter-TSS (NM_001164299)	-promoter-TSS (NM_001164299)	-8	NM_001164299	Plec
chr7	114590922	114591139	-0.169416	10	0.0057651	1	promoter-TSS (NM_001005563)	-promoter-TSS (NM_001005563)	279	NM_001109670	Slc52a2
chr7	115874213	115874363	-0.24261	10	9.1493e-05	1	promoter-TSS (NM_001191787)	-promoter-TSS (NM_001191787)	-79	NM_001191787	Foxred2
chr7	11609059	11609292	-0.158134	12	9.4158e-05	1	intron (NM_001109285, intron 1 of 1)	-intron (NM_001109285, intron 1 of 1)	506	NM_001109285	C2cd4c
chr7	116678527	116679127	-0.161227	15	2.0921e-05	1	Intergenic	Intergenic	56453	NM_199110	Mfng
chr7	117139951	117140236	-0.195868	12	0.00070764	1	exon (NM_019193, exon 5 of 5)	-exon (NM_019193, exon 5 of 5)	9845	NM_019193	Sox10
chr7	118635150	118635259	-0.21872	10	1.7819e-05	1	intron (NM_020084, intron 5 of 36)	-intron (NM_020084, intron 5 of 36)	52926	NM_020084	Cacna1i
chr7	119201813	119202045	-0.150574	10	0.0016229	1	exon (NM_138845, exon 25 of 25)	-exon (NM_138845, exon 25 of 25)	-21653	NM_001130503	Adsl
chr7	120318198	120318370	-0.220237	10	4.1044e-06	1	intron (NM_001170542, intron 1 of 3)	-intron (NM_001098240_3, intron 7 of 9)	15781	NM_001008323	Pmm1
chr7	122534441	122534622	-0.163037	10	6.0162e-05	1	Intergenic	Intergenic	-159045	NM_001012121	Prr5
chr7	122681350	122681530	-0.218035	10	1.7924e-06	1	Intergenic	Intergenic	-12137	NM_001012121	Prr5
chr7	122693369	122693578	-0.158911	10	4.0853e-06	1	promoter-TSS (NM_001012121)	-promoter-TSS (NM_001012121)	-103	NM_001012121	Prr5
chr7	123671344	123671416	-0.193837	10	3.1821e-05	1	Intergenic	Intergenic	-29410	NR_031804	Mirlet7c-2
chr7	124296137	124296769	-0.18757	10	0.0049119	1	Intergenic	Intergenic	-114383	NM_001134861	Cerk
chr7	12715882	12715979	-0.160148	10	6.3474e-05	1	exon (NM_020087, exon 24 of 35)	-exon (NM_020087, exon 24 of 35)	24084	NM_020087	Notch3
chr7	127476368	127476557	-0.165452	10	0.00029169	1	intron (NM_001108106, intron 1 of 37)	-intron (NM_001108106, intron 1 of 37)	6699	NM_001108106	Plxnb2
chr7	136474398	136474512	-0.180808	10	0.00010535	1	exon (NM_021690, exon 1 of 27)	-exon (NM_021690, exon 1 of 27)	204	NM_021690	Rapgef3
chr7	137441494	137441674	-0.224812	10	3.5834e-06	1	Intergenic	Intergenic	-15994	NM_001013222	Rnd1
chr7	137573951	137574129	-0.183576	13	0.00075614	1	exon (NM_030993, exon 2 of 2)	-exon (NM_030993, exon 2 of 2)	2490	NM_030993	Ddn
chr7	138190823	138191066	-0.225129	10	0.00012343	1	Intergenic	Intergenic	-11533	NM_001271369	Nckap5l
chr7	138462816	138463225	-0.173574	10	0.00048211	1	intron (NM_022215, intron 5 of 7)	-intron (NM_022215, intron 5 of 7)	4146	NM_022215	Gpd1
chr7	141107925	141108053	-0.1532	10	0.024269	1	promoter-TSS (NM_001106795)	-promoter-TSS (NM_001106795)	-408	NM_001106795	Aaas
chr7	141682146	141682490	-0.171671	10	2.6485e-06	1	Intergenic	Intergenic	-18240	NM_001106796	Hoxc12
chr7	141768964	141769081	-0.211789	10	9.6899e-05	1	Intergenic	Intergenic	-8308	NM_001108116	Hoxc5
chr7	141870639	141870871	-0.173384	10	2.1071e-05	1	Intergenic	Intergenic	73821	NM_001109884	Hoxc4
chr7	20418069	20418166	-0.157969	10	9.8593e-05	1	Intergenic	Intergenic	-225761	NM_198750	Cry1
chr7	21162194	21162343	-0.167312	10	4.3139e-05	1	Intergenic	Intergenic	109332	NM_001191878	Polr3b
chr7	21623778	21624100	-0.150251	10	0.0015264	1	Intergenic	Intergenic	162526	NM_001106774	Nuak1
chr7	22731399	22731902	-0.202553	10	0.013424	1	intron (NM_001108079, intron 2 of 2)	-intron (NM_001108079, intron 2 of 2)	148419	NM_001108742	Slc41a2
chr7	23141461	23141580	-0.165487	13	0.0004644	1	Intergenic	Intergenic	-47706	NM_031614	Txnrd1
chr7	24200033	24200260	-0.20859	10	0.00018364	1	intron (NM_012619, intron 3 of 12)	-intron (NM_012619, intron 3 of 12)	24249	NM_012619	Pah
chr7	31795268	31795606	-0.167472	13	0.00031576	1	Intergenic	Intergenic	103492	NM_001108084	Tmcc3
chr7	32611168	32611420	-0.187165	10	0.013541	1	Intergenic	Intergenic	-2971	NM_058208	Socs2
chr7	37236906	37237135	-0.162175	12	7.9985e-06	1	Intergenic	Intergenic	343757	NM_053883	Dusp6
chr7	60433127	60433407	-0.190563	10	0.00037208	1	Intergenic	Intergenic	102750	NM_053738	Wif1
chr7	67121833	67122188	-0.178158	10	8.4536e-06	1	intron (NM_022860, intron 2 of 10)	-intron (NM_022860, intron 2 of 10)	1229	NM_022860	B4galnt1
chr7	70648704	70648843	-0.165931	10	3.8512e-05	1	Intergenic	Intergenic	-51329	NM_031735	Stk3
chr7	9741202	9741400	-0.158384	14	9.8105e-05	1	Intergenic	Intergenic	-26834	NM_031567	Nfic
chr7	9945342	9945637	-0.155902	10	0.00056984	1	intron (NM_021859, intron 1 of 12)	-intron (NM_021859, intron 1 of 12)	334	NM_021859	Matk
chr8	108157552	108157750	-0.17433	10	0.00031879	1	intron (NM_001108775, intron 1 of 6)	-intron (NM_001108775, intron 1 of 6)	6590	NM_001108775	Rab6b
chr8	111495255	111495592	-0.239674	10	0.00023435	1	Intergenic	Intergenic	-14934	NM_001100547	Dusp7
chr8	112941130	112941691	-0.184058	10	0.0016315	1	intron (NM_001108185, intron 6 of 18)	-intron (NM_001108185, intron 6 of 18)	-11257	NM_001108780	Gnat1
chr8	113176184	113176532	-0.182715	10	6.9895e-05	1	exon (NM_001106855, exon 1 of 19)	-exon (NM_001106855, exon 1 of 19)	381	NM_001106855	Mst1r
chr8	118996916	118997147	-0.171424	16	3.0065e-05	1	Intergenic	Intergenic	-24667	NM_001191801	Trim71
chr8	121688371	121688613	-0.164305	10	0.00073252	1	Intergenic	Intergenic	-269861	NM_138833	Snrk
chr8	122812958	122813606	-0.172195	10	0.010567	1	Intergenic	Intergenic	-148020	NM_001025705	Azi2
chr8	123374727	123374840	-0.166945	10	0.00094061	1	Intergenic	Intergenic	-29756	NM_001191080	Golga4
chr8	124479922	124480114	-0.256584	14	2.6604e-05	1	exon (NM_001160162, exon 17 of 27)	-exon (NM_001160162, exon 17 of 27)	65283	NM_013125	Scn5a
chr8	126404953	126405362	-0.169602	13	5.7837e-06	1	intron (NM_001134565, intron 2 of 15)	-intron (NM_001134565, intron 2 of 15)	33074	NM_001134565	Trak1
chr8	13284590	13284717	-0.22958	10	0.00032859	1	Intergenic	Intergenic	-1065	NM_138544	Fat3
chr8	20891722	20891897	-0.175459	18	0.0023923	1	exon (NM_001270413, exon 3 of 12)	-exon (NM_001270413, exon 3 of 12)	3181	NM_001270413	Kank2
chr8	38773100	38773350	-0.171107	12	7.6332e-05	1	promoter-TSS (NM_001004245)	-promoter-TSS (NM_001004245)	1	NM_001004245	Esam
chr8	43766549	43766719	-0.164427	10	0.0006199	1	exon (NM_173154, exon 7 of 7)	-exon (NM_173154, exon 7 of 7)	-17401	NM_024351_1	Hspa8
chr8	44340864	44341116	-0.168658	10	0.00014897	1	Intergenic	Intergenic	-122078	NR_126581	Lnc215
chr8	4612212	4612337	-0.203982	10	5.2312e-06	1	intron (NM_001014205, intron 1 of 3)	-intron (NM_001014205, intron 1 of 3)	8145	NM_001014205	Tmem123
chr8	46351524	46351737	-0.203521	10	0.0061257	1	Intergenic	Intergenic	38986	NM_001106815	Trim29
chr8	48235407	48235655	-0.172552	10	0.0013948	1	Intergenic	Intergenic	-11092	NM_057193	Il10ra
chr8	53701254	53701437	-0.183652	11	0.00089584	1	Intergenic	Intergenic	-150757	NM_001014209	Plet1
chr8	56599340	56599558	-0.191691	10	8.703e-06	1	intron (NM_001106820, intron 15 of 17)	-intron (NM_001106820, intron 15 of 17)	107074	NM_001106820	Ddx10
chr8	62232320	62232429	-0.169924	10	0.001005	1	Intergenic	Intergenic	-65472	NM_001113791	RGD1562618
chr8	64215032	64215366	-0.173314	10	4.809e-05	1	Intergenic	Intergenic	416705	NM_001134469	Lrrc49
chr8	70361158	70361314	-0.156128	10	0.0094611	1	Intergenic	Intergenic	-8800	NM_001106832	Snx22
chr8	73342442	73342661	-0.173612	12	4.9333e-05	1	Intergenic	Intergenic	-494285	NM_001191108	Ice2
chr8	74211692	74211801	-0.205028	10	0.0005744	1	Intergenic	Intergenic	-8856	NM_001013248	Foxb1
chr8	75934492	75935017	-0.171373	10	0.0013143	1	Intergenic	Intergenic	19838	NM_183402	Polr2m
chr8	94629730	94630108	-0.222477	10	9.7613e-06	1	intron (NM_001106845, intron 1 of 1)	-intron (NM_001106845, intron 1 of 1)	436	NM_001106845	Ankrd34c
chr8	94781576	94781823	-0.214709	11	1.4928e-05	1	Intergenic	Intergenic	-20767	NM_001105753	Rasgrf1
chr9	10240156	10240366	-0.236974	10	0.00019291	1	TTS (NM_001108201)	-TTS (NM_001108201)	3810	NM_001108202	Dlk2
chr9	105493794	105494127	-0.175466	10	0.0001071	1	Intergenic	Intergenic	151113	NM_013017	Rab12
chr9	106856182	106856292	-0.203621	10	2.3855e-05	1	intron (NM_001108237, intron 1 of 62)	-intron (NM_001108237, intron 1 of 62)	982	NM_001108237	Lama1
chr9	11367469	11367656	-0.164999	10	3.5155e-05	1	Intergenic	Intergenic	201932	NM_053527	Cdc5l
chr9	11409205	11409363	-0.183318	10	0.00040771	1	Intergenic	Intergenic	243653	NM_053527	Cdc5l
chr9	18080835	18080966	-0.192249	10	0.0047833	1	exon (NM_001106896, exon 8 of 8)	-exon (NM_001106896, exon 8 of 8)	28499	NM_001106896	Tfap2b
chr9	24920002	24920685	-0.162821	15	0.0019707	1	Intergenic	Intergenic	-424935	NM_001106898	Adgrb3
chr9	2547750	2547835	-0.174206	10	2.9266e-05	1	Intergenic	Intergenic	-1288	NM_145095	Kcnh8
chr9	35258813	35259522	-0.156768	11	7.2182e-05	1	exon (NM_001034835, exon 20 of 20)	-exon (NM_001034835, exon 20 of 20)	19355	NM_001034934	Arid5a
chr9	37559962	37560252	-0.157366	10	0.0030215	1	Intergenic	Intergenic	-43271	NM_001191887	Aff3
chr9	37798893	37799429	-0.167729	10	0.0062226	1	Intergenic	Intergenic	82496	NM_080397	Chst10
chr9	38253595	38253804	-0.176534	10	7.8825e-06	1	Intergenic	Intergenic	-1662	NM_001108214	Npas2
chr9	41862762	41862920	-0.160789	10	0.00012724	1	Intergenic	Intergenic	-10782	NM_138837	Pou3f3
chr9	53909447	53909516	-0.163825	11	0.00013574	1	Intergenic	Intergenic	-13313	NM_133528	Mob4
chr9	55830999	55831177	-0.253947	10	4.2807e-05	1	Intergenic	Intergenic	-6405	NM_001109306	Satb2
chr9	6063650	6063913	-0.193963	10	0.0058698	1	intron (NM_001135011, intron 2 of 9)	-intron (NM_001135011, intron 2 of 9)	54834	NM_001135011	Rftn1
chr9	8297251	8297391	-0.195214	12	4.2225e-06	1	Intergenic	Intergenic	14693	NM_001106886	RGD1565959
chr9	8418024	8418210	-0.151604	15	4.2452e-05	1	Intergenic	Intergenic	-90911	NM_001108788	Foxp4
chr9	8510906	8511006	-0.239939	10	9.9009e-05	1	intron (NM_001108788, intron 1 of 15)	-intron (NM_001108788, intron 1 of 15)	1928	NM_001108788	Foxp4
chr9	8696078	8696527	-0.212338	10	2.027e-06	1	Intergenic	Intergenic	-24560	NM_001025707	Tfeb
chr9	88616564	88616779	-0.176549	13	0.0013814	1	Intergenic	Intergenic	-94736	NM_001108230	Agap1
chr9	91300762	91301233	-0.173699	10	0.00097436	1	intron (NM_053449, intron 2 of 26)	-intron (NM_053449, intron 2 of 26)	88812	NM_053449	Hdac4
chr9	94749655	94749896	-0.197896	10	0.0020322	1	Intergenic	Intergenic	-70506	NM_053914	St8sia4
chr9	9540887	9541064	-0.252315	10	2.3133e-05	1	Intergenic	Intergenic	-182180	NM_001106889	Ptk7
chrX	127606843	127607050	-0.160824	10	0.041581	1	Intergenic	Intergenic	68262	NM_001106846	Cldn2
chrX	134065100	134065213	-0.233689	10	7.9424e-06	1	Intergenic	Intergenic	183532	NM_001271190	Smarca1
chrX	143135828	143135927	-0.16041	10	9.5628e-06	1	intron (NM_001109019, intron 2 of 2)	-intron (NM_001109019, intron 2 of 2)	7154	NM_001109019	Zic3
chrX	159538161	159538310	-0.176856	10	1.8966e-06	1	intron (NM_001037973, intron 1 of 3)	-intron (NM_001037973, intron 1 of 3)	224	NM_001037973	Dusp9
chrX	159745613	159745821	-0.159362	10	0.0049785	1	intron (NM_001135836, intron 1 of 7)	-intron (NM_001135836, intron 1 of 7)	493	NM_001135836	Pdzd4
chrX	22704146	22704280	-0.251756	10	7.2642e-05	1	Intergenic	Intergenic	-74242	NM_001191586	Bcor
chrX	22864923	22865095	-0.167457	10	2.5794e-06	1	Intergenic	Intergenic	86554	NM_001191586	Bcor
chrX	23228633	23228822	-0.231829	10	7.8558e-05	1	Intergenic	Intergenic	450273	NM_001191586	Bcor
chrX	2560105	2560363	-0.266888	10	2.8852e-05	1	exon (NM_001109313, exon 1 of 5)	-exon (NM_001109313, exon 1 of 5)	290	NM_001109313	Sh2d1a
chrX	26018079	26018418	-0.232701	10	9.7753e-05	1	Intergenic	Intergenic	26525	NM_001110367	LOC691895
chrX	26614848	26614953	-0.198955	10	0.00029087	1	exon (NM_019279, exon 3 of 3)	-exon (NM_019279, exon 3 of 3)	3126	NM_019279	Pcsk1n
chrX	38586377	38586569	-0.152627	10	4.8944e-06	1	Intergenic	Intergenic	-1498	NM_001013250	Mageh1
chrX	46181007	46181155	-0.155141	10	7.7942e-06	1	Intergenic	Intergenic	-149709	NM_001014111	Msl3
