# Supplementary material for: Integrated Analysis of Omics Data Reveal AP-1 as a Potential Regulation Hub in the Inflammation-Induced Hyperalgesia Rat Model
Source: Front Immunol. 2021 May 28;12:672498. doi: 10.3389/fimmu.2021.672498 (PMC8194263; doi:10.3389/fimmu.2021.672498)
Supplement: Supplementary file 12 [file Table_11.xlsx]

## Sheet: Sheet1
Ensembl.ID	Gene.name	Ctrl_1	Ctrl_2	Ctrl_3	Ctrl_4	Ctrl_5	Ctrl_6	Ctrl_7	Ctrl_8	Ctrl_9	Ctrl_10	CFA_1	CFA_2	CFA_3	CFA_4	CFA_5	CFA_6	CFA_7	CFA_8	CFA_9	CFA_10
ENSRNOG00000001369	Oas1a	71	111	130	135	115	85	66	164	157	112	42	86	104	34	55	52	45	63	17	17
ENSRNOG00000005154	Alkal2	28	16	18	15	7	24	22	29	24	21	36	70	38	68	113	68	93	167	123	125
ENSRNOG00000006151	Reg3b	11	19	49	15	3	40	19	19	14	20	272	253	245	186	492	240	245	406	236	163
ENSRNOG00000006360	Reg3a	9	12	18	19	8	11	10	6	13	5	61	68	62	84	120	77	77	102	66	52
ENSRNOG00000012843	Aspg	15	17	16	17	44	15	12	20	10	22	30	42	81	34	18	46	69	132	28	35
ENSRNOG00000014079	Stat4	1792	1780	1911	2070	1588	2286	1781	2179	1867	1921	1720	2163	1592	1798	1551	1947	1927	1788	1581	1387
ENSRNOG00000038135	RatNP-3b	10	14	25	20	17	16	21	17	18	25	47	33	151	18	18	32	17	73	93	95
ENSRNOG00000047450	Lmo3	48	71	85	41	36	61	44	54	35	51	27	30	35	36	49	47	33	48	30	37
ENSRNOG00000048976	LOC501467	6	4	11	97	77	30	40	44	16	2	165	135	63	148	120	156	119	103	193	136
ENSRNOG00000050134	LOC108348293	0	0	0	7	2	3	6	5	1	0	13	7	13	9	8	12	3	7	20	15
